# Supplementary material for: The cooperation between RNA binding proteins ZFP36L1 and ZFP36L2 controls thymic epithelial cell differentiation to promote thymus function.
Source: Research Square preprint supplement (doi:10.21203/rs.3.rs-6941685/v1), 2025-06-25
Supplement: Supplementary file 1 [file 148d94296e33127526d93246.xlsx]

## Sheet: cTEC
GeneName	baseMean	log2FoldChange	lfcSE	stat	pvalue	padj
Malat1	561.574	0.685378	0.12769	26.5486	2.56986e-07	7.51899e-06
Ctsl	181.852	0.555728	0.156707	11.7873	0.000596347	0.004465
Cd74	144.034	-0.115375	0.115267	1.01621	0.313421	0.402935
Krt18	109.623	0.749286	0.128958	30.9662	2.62566e-08	9.7741e-07
Tbata	104.567	0.568585	0.173399	10.0676	0.00150899	0.00930386
Fabp5	100.605	0.352173	0.170774	4.0879	0.0431914	0.113324
Ccl21a	99.9358	-0.646199	0.350607	3.63328	0.056635	0.137368
Fth1	81.7362	0.366087	0.167761	4.57141	0.0325099	0.0926567
Cstb	71.5702	0.538691	0.15573	11.2639	0.00079027	0.00563493
Ubb	58.8809	0.27514	0.111674	5.91015	0.0150539	0.0532638
Ccl25	58.0592	0.0696364	0.215515	0.103863	0.747242	0.759892
mt-Cytb	57.2573	0.163977	0.0831717	3.82288	0.0505571	0.126457
Ifitm3	54.4106	0.213891	0.136212	2.41407	0.120249	0.221322
mt-Co3	50.9301	-0.171107	0.0836394	4.25572	0.0391184	0.105755
Actb	50.0236	0.227762	0.116129	3.7706	0.0521608	0.129285
Eef1a1	47.7274	0.150294	0.120706	1.53739	0.215007	0.316523
Ptma	46.8286	0.313464	0.109941	7.88796	0.0049765	0.0231701
H3f3b	46.0294	0.703474	0.121557	31.0785	2.47805e-08	9.26815e-07
Tmsb4x	45.4268	0.104882	0.141245	0.550467	0.458127	0.514007
mt-Atp6	45.2897	-0.176852	0.0927952	3.6971	0.054507	0.133597
Krt8	45.0408	0.62323	0.129213	21.7965	3.03153e-06	5.99427e-05
H2-Aa	44.6172	-0.0493078	0.125627	0.159735	0.689401	0.706691
Tpt1	43.4513	-0.230938	0.108737	4.64065	0.0312232	0.090156
mt-Co1	43.0569	-0.211873	0.101159	4.47981	0.0342975	0.0964273
Prss16	42.7941	0.714292	0.200168	11.7429	0.000610773	0.0045558
Actg1	41.4706	0.556345	0.137346	15.4746	8.36222e-05	0.000892383
H2-Ab1	40.226	-0.0857082	0.106983	0.662929	0.415528	0.48122
mt-Co2	39.6099	-0.0431628	0.0876328	0.24772	0.618685	0.644704
Rps8	39.4919	0.147443	0.112098	1.72336	0.189262	0.293958
Rpl13	39.4636	-0.0739298	0.10436	0.522962	0.469581	0.523145
Hsp90ab1	38.715	0.316146	0.0977348	10.2125	0.00139495	0.00875738
Itm2b	38.4047	0.814841	0.133732	34.0276	5.4336e-09	2.38225e-07
Krt17	37.597	0.280631	0.224161	1.51924	0.217735	0.319245
Rps24	35.449	0.00571394	0.113425	0.0143648	0.904599	0.906543
Rpl41	35.2726	-0.165419	0.103899	2.61175	0.106075	0.205415
Rps20	34.8776	0.202642	0.107428	3.51711	0.0607384	0.143931
Ppia	34.5293	0.233375	0.120393	3.69217	0.0546686	0.133869
Rpl39	33.3734	-0.0532874	0.118018	0.222011	0.637512	0.661281
Fau	33.1184	0.077052	0.105197	0.55266	0.457233	0.513367
Rps27a	32.7736	0.177734	0.117291	2.27723	0.131286	0.232878
H2-K1	31.6462	-0.37744	0.116883	10.8708	0.000976905	0.00661092
Rpl18a	31.4178	0.0335668	0.110203	0.108854	0.741453	0.754489
Rpl27a	30.6942	0.264842	0.109444	5.74923	0.0164959	0.0568431
Rpl11	30.5086	0.197337	0.108773	3.26795	0.0706458	0.158413
Krt5	29.8556	1.48391	0.222713	37.263	1.03222e-09	5.42018e-08
Rpl9	29.7159	0.0824928	0.119977	0.488186	0.484738	0.535535
Rps3a1	29.564	-0.00704597	0.127136	0.0162419	0.898589	0.900976
Rpl19	29.3992	0.0496165	0.110948	0.222078	0.637461	0.661281
Rpl21	28.9216	0.06493	0.105611	0.403024	0.525532	0.56778
Rpl23	28.785	-0.0986627	0.113588	0.78555	0.375449	0.450109
Rpl35a	28.2456	-0.0985033	0.100274	1.02052	0.312396	0.401978
B2m	28.1086	-0.703161	0.120629	36.4356	1.57799e-09	7.8639e-08
Hspa1b	27.6915	0.172275	0.164849	1.07609	0.299574	0.391407
Rps2	26.9318	0.0556687	0.128579	0.204964	0.650744	0.672894
Rps10	26.2804	0.0676786	0.112642	0.393551	0.530439	0.571602
Rpl37	26.2112	0.00525603	0.107755	0.0320621	0.857892	0.862679
Rpl6	25.789	0.187191	0.109012	2.94125	0.0863441	0.181443
Rplp0	25.6122	0.352486	0.128824	7.27366	0.0069973	0.0302708
mt-Nd4	25.1431	-0.0452939	0.0892143	0.270467	0.603019	0.631748
H2-Eb1	25.0434	-0.178529	0.117063	2.39626	0.121626	0.222866
Rps7	24.7737	0.0297992	0.118522	0.0893314	0.765029	0.776089
Rpl10	24.2979	0.165826	0.128843	1.66039	0.197551	0.301169
Tmsb10	24.2954	-0.551991	0.134494	17.8192	2.42923e-05	0.000325361
Rplp1	24.0961	0.120806	0.118365	1.0696	0.301035	0.392358
Rps16	23.9956	-0.0588902	0.108522	0.331041	0.565047	0.600007
Jun	23.8874	0.409998	0.215915	3.44838	0.063314	0.147869
H2-D1	23.5818	-0.366736	0.119461	9.81949	0.00172672	0.0104115
Rps26	23.4922	0.522854	0.114296	20.0309	7.62026e-06	0.000124323
Rps12	23.4183	-0.134885	0.106314	1.69582	0.192835	0.296776
Rpl32	23.3665	0.13656	0.111292	1.5322	0.215783	0.317429
Rpl28	23.155	0.137052	0.100628	1.89468	0.168676	0.272666
Rpl30	22.7745	0.0463415	0.115289	0.196213	0.657795	0.678945
Ifi27l2a	22.4165	-1.00817	0.210597	25.2574	5.01673e-07	1.34839e-05
Rps21	21.9258	-0.121219	0.109934	1.28708	0.256587	0.353711
Rps4x	21.8975	-0.154609	0.118712	1.76235	0.184332	0.289592
Rps15a	21.8144	-0.00225603	0.119752	0.0359759	0.849565	0.855717
Hspa8	21.7932	0.25191	0.108271	5.38396	0.0203227	0.0664763
Ftl1	21.6165	0.135587	0.124222	1.20328	0.272667	0.367238
Rpl38	21.5611	-0.0531507	0.0984212	0.352481	0.552712	0.590301
Rpl17	21.5013	-0.00861697	0.109374	0.0591653	0.80782	0.816262
Rpl34	21.2388	-0.00225671	0.11122	0.0458378	0.830471	0.837655
Rpl37a	21.2349	-0.194142	0.0971439	4.18637	0.0407504	0.108828
Rpsa	20.7788	0.035791	0.114854	0.143451	0.704874	0.720597
Ly6e	20.6499	0.304071	0.120188	6.27078	0.0122745	0.0462331
Rps5	20.2794	0.118074	0.120583	0.990366	0.319653	0.407593
Rps14	20.1195	0.0535646	0.110542	0.300417	0.583621	0.616101
S100a11	20.1022	0.120714	0.133837	0.827991	0.362854	0.440795
Rpl24	19.8774	0.102636	0.101367	1.10577	0.293002	0.385852
Hspa1a	19.7983	0.251214	0.197725	1.57463	0.209536	0.31206
Rpl36	19.7513	-0.119572	0.0886442	1.96119	0.161387	0.266351
Cxcl12	19.6614	0.383152	0.181182	4.31598	0.037756	0.103301
Cox8a	19.6168	0.278003	0.12051	5.25664	0.0218632	0.070155
Rps11	19.4516	0.320552	0.105338	9.11749	0.00253177	0.0139309
Rps29	19.3098	-0.339632	0.0997449	12.1412	0.000493211	0.00379677
mt-Nd1	19.2251	0.235931	0.0919969	6.44915	0.0111006	0.0429139
Gas6	19.1623	0.461651	0.110535	16.8647	4.01409e-05	0.000487768
Ndufa11	18.9954	0.209629	0.111399	3.54874	0.0595906	0.141975
Rpl26	18.6431	-0.0608435	0.0967426	0.499426	0.479752	0.531799
Rplp2	18.608	0.142554	0.103636	1.9735	0.160077	0.265199
Prxl2b	18.3967	0.686756	0.132459	25.2646	4.998e-07	1.34839e-05
Wfdc18	18.1983	-0.373742	0.427492	0.795421	0.372466	0.447671
Rpl13a	18.1512	0.220393	0.103987	4.55786	0.032768	0.0932387
Rpl8	18.0909	-0.101136	0.10888	0.949867	0.329753	0.415414
Rps23	18.0523	0.0342558	0.108163	0.173517	0.677005	0.695874
Rpl10a	18.0339	0.109322	0.107439	1.12101	0.289701	0.383031
Eif1	17.9402	-0.00395286	0.110847	0.0513958	0.820652	0.8287
Rpl18	17.3627	0.210597	0.111975	3.55968	0.0591992	0.141226
Rps19	17.1933	0.0376526	0.110976	0.19016	0.662783	0.683471
Rps3	16.9705	0.101196	0.121302	0.75441	0.385083	0.457799
Rpl15	16.9588	0.0620595	0.117555	0.340631	0.559465	0.595596
Txn1	16.9068	-0.0650117	0.121847	0.315072	0.574585	0.608018
Naca	16.8266	0.153319	0.111448	1.95004	0.162583	0.267452
Sfn	16.8004	1.9479	0.150457	140.268	2.32585e-32	9.22083e-29
Rpl3	16.4939	0.259031	0.120244	4.64475	0.0311487	0.0900067
Gapdh	16.1601	0.513264	0.124707	16.3366	5.30304e-05	0.000608507
Rbfox1	16.0583	-1.12358	0.255167	21.5543	3.43951e-06	6.49331e-05
Junb	16.036	0.497937	0.18586	6.82272	0.00900055	0.0366729
Rpl27	16.0346	0.0895059	0.10267	0.860168	0.353692	0.433584
Pltp	15.91	0.408177	0.125138	10.3568	0.00128999	0.00823539
Myl6	15.8938	-0.209382	0.113092	3.57344	0.0587104	0.140469
Rps28	15.7465	-0.185474	0.116785	2.67483	0.101946	0.200878
H3f3a	15.4608	0.485447	0.112386	18.1031	2.09264e-05	0.000287566
Rps9	15.4207	-0.163626	0.12099	1.91575	0.166325	0.270577
Chchd2	15.3905	0.227627	0.112844	4.10811	0.0426779	0.112311
Fos	15.3479	0.569654	0.290395	3.6101	0.0574298	0.138323
Tsc22d1	15.0708	0.591015	0.126673	20.889	4.86673e-06	8.81011e-05
Rps13	14.743	0.210326	0.120963	3.06432	0.0800286	0.172338
Rps18	14.5759	0.165391	0.107761	2.49597	0.114138	0.214456
Anxa5	14.2881	0.3866	0.124431	9.43356	0.0021305	0.0122678
Rpl29	14.0492	0.159024	0.106795	2.31635	0.12802	0.229745
Clu	13.6569	2.41798	0.22335	90.7732	1.61123e-21	1.16141e-18
Rps27	13.4321	-0.466303	0.110302	18.9209	1.36252e-05	0.000201933
Tmem176b	13.2923	0.0120669	0.135873	0.04628	0.829668	0.837057
Rpl7	13.1269	-0.0936415	0.115589	0.770148	0.380171	0.453761
Bnip3l	13.0669	0.0476026	0.123864	0.221844	0.637638	0.661325
mt-Nd2	13.0219	0.068408	0.0997245	0.478509	0.489098	0.538994
Tmem131l	12.7736	-0.081649	0.142063	0.339758	0.559969	0.596052
Jund	12.5521	0.0975103	0.150428	0.427719	0.51311	0.557704
Dstn	12.4525	0.0352387	0.106925	0.204792	0.65088	0.672947
Rpl7a	12.447	0.253953	0.111584	5.26126	0.0218052	0.0700257
Lamp2	12.4087	0.304667	0.12331	6.14727	0.0131615	0.0484935
Rpl14	12.3664	0.0901807	0.106807	0.888546	0.345872	0.428784
Atp5e	12.2751	0.14745	0.100092	2.31256	0.128333	0.229903
Igfbp5	12.1105	-0.0887953	0.208392	0.184197	0.667791	0.687652
S100a10	12.0503	0.598419	0.157336	13.7917	0.000204238	0.00185295
Hspb1	12.0157	1.3753	0.284708	19.8851	8.22381e-06	0.000132265
Hmgb1	11.6221	0.0321924	0.105837	0.264265	0.607205	0.63466
Slc25a4	11.6199	0.222613	0.121573	3.45945	0.0628911	0.147403
Hpgd	11.571	1.32622	0.195842	40.1007	2.41202e-10	1.47115e-08
Rpl22	11.4756	-0.0599244	0.104795	0.51417	0.473339	0.526087
Sumo2	11.4716	0.191856	0.125846	2.38301	0.122661	0.223942
Gpx4	11.3977	0.360126	0.100884	12.7723	0.000351784	0.00289702
Fgf14	11.3964	-0.84496	0.223165	15.5982	7.83297e-05	0.000851956
Atp6v1g1	11.3888	0.915728	0.119939	54.9791	1.21817e-13	1.60981e-11
Crip3	11.2137	0.162246	0.181519	0.799831	0.371144	0.446821
Nfkbia	11.1694	0.68652	0.154489	18.5583	1.64783e-05	0.000235583
Elob	11.1034	0.150827	0.100279	2.42396	0.119492	0.22039
Gnas	11.1031	-0.0508324	0.100076	0.454704	0.50011	0.546721
Ubc	11.0971	0.55591	0.132072	17.0898	3.56538e-05	0.000448728
Btf3	11.0895	0.244468	0.117339	4.45519	0.0347954	0.0974973
Rpl35	10.8973	-0.0851433	0.107833	0.884548	0.346959	0.429447
Atpif1	10.8407	0.137806	0.102191	2.05902	0.151308	0.254934
Psmb10	10.7734	-0.197849	0.146774	1.89047	0.169149	0.273104
Prdx1	10.7199	0.332669	0.122788	7.36476	0.00665143	0.0291699
Prdx2	10.7115	0.527244	0.112691	21.5152	3.5104e-06	6.61138e-05
Cox6c	10.6981	-0.0093814	0.108737	0.186888	0.665519	0.685757
Gm36660	10.5379	8.60319	0.652441	1053.59	4.04019e-231	3.20347e-227
Pfn1	10.3889	0.123709	0.110241	1.38151	0.239845	0.338981
Ddx5	10.2916	-0.00785546	0.0928939	0.320124	0.571533	0.605355
Ank3	10.2616	-0.365205	0.11769	10.0954	0.00148638	0.0091859
Psmb9	10.2282	0.0245729	0.129623	0.140408	0.707876	0.722919
Cox4i1	10.2166	0.295742	0.109734	7.39795	0.00652982	0.0287172
Calm1	10.1808	0.352115	0.126003	7.83865	0.00511408	0.0235753
Rps15	10.1293	-0.0686214	0.097151	0.873747	0.34992	0.431294
Rpl5	10.1191	-0.0798777	0.110207	0.828175	0.362801	0.440795
Nfia	10.079	-0.106853	0.102546	1.26259	0.261161	0.357646
Hsp90b1	10.0751	0.532072	0.130852	16.0701	6.10392e-05	0.000687471
Fxyd2	9.84534	0.421863	0.286712	2.07348	0.149879	0.253392
Hsp90aa1	9.83209	-0.137913	0.12172	1.36145	0.243286	0.342024
Ndufa4	9.72536	0.271958	0.114807	5.76795	0.0163211	0.0564124
Nav2	9.66701	-0.037377	0.131687	0.108541	0.741811	0.75466
Tmbim6	9.66302	0.938634	0.122954	55.4384	9.64355e-14	1.296e-11
Hspa5	9.62327	0.44838	0.1386	10.2108	0.00139623	0.00875845
Cbr2	9.59137	-0.309409	0.22662	1.93429	0.16429	0.26881
Rps6	9.57398	-0.14639	0.107925	2.17217	0.140528	0.243232
Gas5	9.54566	-0.273172	0.119963	5.5109	0.0188983	0.0629157
Ifi27	9.51084	0.301843	0.149893	4.00602	0.0453381	0.117167
Cox7c	9.45262	0.268802	0.104586	6.93112	0.00847088	0.0350368
Hnrnpa2b1	9.40092	0.206713	0.0955392	5.10693	0.0238305	0.0745371
Cxcl10	9.35952	1.1282	0.381053	7.6904	0.00555154	0.025276
Rps25	9.2584	0.0476935	0.103502	0.61755	0.431959	0.494051
Calm2	9.21851	0.110314	0.118083	0.968536	0.325045	0.41197
Oaz1	9.20522	0.346209	0.125169	7.67956	0.00558499	0.0253773
Pbx1	9.20479	0.0204199	0.114705	0.0925635	0.760943	0.772538
Hspe1	9.06609	0.182041	0.136761	1.86427	0.172132	0.276143
Slc46a2	9.06599	-0.172309	0.123937	2.02573	0.154655	0.259032
Rpl36a	9.05297	-0.157885	0.120523	1.94047	0.163618	0.268266
Eef1b2	8.98762	0.196704	0.123299	2.74554	0.0975261	0.196148
Lifr	8.95544	-0.0832307	0.175618	0.229156	0.63215	0.656825
Serf2	8.88801	0.225934	0.103497	5.01579	0.0251172	0.0773416
Cst3	8.85718	0.106074	0.123926	0.863054	0.352886	0.43317
Psma7	8.79447	0.227316	0.114963	4.14251	0.0418191	0.110707
Rack1	8.7818	-0.110706	0.116868	1.13933	0.285794	0.379638
Rbms3	8.73749	-0.33258	0.135551	6.32257	0.0119211	0.0452909
Npm1	8.70256	0.0564816	0.116179	0.492021	0.483027	0.534457
Edf1	8.65603	0.288367	0.110087	7.09967	0.00770981	0.0325599
Psmb4	8.64411	0.622816	0.13264	21.5663	3.41807e-06	6.46823e-05
Cox7a2	8.61554	0.708358	0.109873	41.0107	1.51395e-10	9.83943e-09
Sem1	8.46362	-0.0459854	0.100048	0.539651	0.462577	0.517974
Rpl12	8.44477	-0.151188	0.11704	2.02905	0.154317	0.258683
Atp5g2	8.40786	0.212067	0.111756	3.91208	0.0479404	0.122186
Uqcrh	8.39623	0.29758	0.113223	7.1772	0.00738357	0.0314416
Anxa2	8.27634	-0.269708	0.151103	3.3272	0.068143	0.155127
Mdk	8.27065	0.950327	0.183612	24.4485	7.63215e-07	1.86723e-05
Gng5	8.1943	0.0558498	0.108152	0.550162	0.458251	0.514074
Rpl36al	8.19024	0.331638	0.102354	10.825	0.00100136	0.00674232
Tnc	8.18613	-1.10361	0.181519	40.7554	1.72526e-10	1.11216e-08
Spint2	8.17274	0.0953616	0.109804	0.820906	0.364915	0.442553
Atp5l	8.15906	0.0892353	0.106274	1.11698	0.290569	0.383732
Atp5h	8.05854	0.0894582	0.109236	1.02742	0.310766	0.400791
Atp5j	8.04954	0.270181	0.10448	7.18047	0.00737015	0.0314013
Rps17	8.04126	0.166833	0.110097	2.70771	0.0998642	0.198502
Pfdn5	8.0219	0.0709747	0.103213	0.86954	0.351083	0.43205
Il7	7.99955	0.560091	0.144164	14.5375	0.000137401	0.00133185
Sf3b6	7.97488	0.539846	0.113857	22.5114	2.08895e-06	4.40513e-05
Epcam	7.96785	0.441877	0.121171	13.1601	0.000285967	0.0024646
Pax1	7.9316	0.425905	0.130599	10.737	0.00105013	0.00697743
Gabarap	7.88998	0.0152141	0.106418	0.371569	0.54215	0.581457
Atp5j2	7.85278	0.36611	0.11062	11.3624	0.000749446	0.00541692
Hmgn1	7.83756	-0.0484905	0.119284	0.45076	0.501974	0.548381
Atp5b	7.78312	0.278902	0.113322	6.52525	0.0106353	0.0414998
Mif	7.77374	0.440753	0.120693	13.2804	0.000268202	0.00232922
Cox5b	7.70132	0.328534	0.105494	10.0719	0.00150545	0.00928926
Mast4	7.69919	-0.309272	0.129282	6.05559	0.0138624	0.0503042
Alcam	7.6205	-0.700543	0.142253	25.9307	3.5389e-07	9.91518e-06
Nlgn1	7.54258	-1.31007	0.204788	46.0343	1.16199e-11	1.00146e-09
Auts2	7.47055	-0.339111	0.131676	6.86131	0.0088082	0.0360931
Cd9	7.46447	1.20544	0.138953	70.485	4.63775e-17	1.5322e-14
Dnaja1	7.45756	0.174925	0.123043	2.15429	0.142172	0.245009
Isg20	7.44872	1.11013	0.212907	24.6395	6.91213e-07	1.72948e-05
Ifitm2	7.44435	0.00856404	0.128862	0.0854486	0.770045	0.780379
Rpl23a	7.42402	0.0310314	0.114484	0.439696	0.507269	0.552871
Nme2	7.37158	0.181557	0.117648	2.59326	0.107319	0.206889
Cox6b1	7.35487	0.222313	0.104132	5.13682	0.0234235	0.0737295
Meis2	7.33656	-0.0483311	0.111739	0.328361	0.566626	0.601362
D17H6S56E-5	7.30382	0.454179	0.178078	6.25269	0.0124005	0.0465159
S100a1	7.29371	0.623485	0.147581	17.3672	3.08099e-05	0.000396577
Selenof	7.28934	0.256322	0.124807	4.39707	0.0360006	0.0997725
Itm2c	7.28922	0.850012	0.138311	36.1959	1.78446e-09	8.68038e-08
Tle5	7.25231	0.0939277	0.0998667	1.43124	0.231563	0.332018
Eef2	7.24781	0.282935	0.101103	8.61401	0.00333588	0.016977
Pakap.1	7.23272	0.320405	0.154358	4.25616	0.0391083	0.105755
Atox1	7.22471	0.505185	0.102106	24.6666	6.81546e-07	1.72101e-05
H2-T23	7.20422	-0.119515	0.121413	1.18057	0.27724	0.371826
Laptm4a	7.18763	0.0272601	0.123206	0.326219	0.567894	0.602364
Map1lc3a	7.1778	0.643031	0.143605	19.2924	1.12149e-05	0.000171336
Ybx1	7.12447	0.0419303	0.102525	0.692488	0.405319	0.473721
Atp5d	7.01851	0.204507	0.107251	4.18254	0.0408424	0.108963
Sec61b	6.97458	0.627278	0.123946	25.2608	5.00776e-07	1.34839e-05
Rps27l	6.95492	0.41933	0.111163	14.8056	0.00011918	0.00119165
H2bc4	6.93655	0.75139	0.157911	21.7135	3.16552e-06	6.16694e-05
Wnt4	6.91118	0.0901195	0.107004	1.06102	0.302982	0.393822
Uqcrb	6.88649	0.380141	0.11113	12.1178	0.000499426	0.00383344
Psmb1	6.88029	0.57926	0.105799	30.552	3.2504e-08	1.19317e-06
Nxn	6.86229	0.136159	0.106301	1.82805	0.176358	0.280623
Egr1	6.84532	0.22827	0.249661	0.819048	0.365459	0.443009
Hint1	6.81385	-0.578412	0.146535	16.4887	4.89405e-05	0.000566824
Npc2	6.73969	-0.275085	0.129272	4.75572	0.0292011	0.0862142
Perp	6.72402	0.831705	0.155693	27.2631	1.7757e-07	5.5214e-06
Atp6v0e	6.70479	1.06969	0.134503	60.745	6.49677e-15	1.09602e-12
Uqcr11	6.69949	0.224006	0.106367	5.12296	0.0236113	0.0740855
Rpl31	6.65919	0.0714683	0.0994917	1.30459	0.253376	0.351033
Rbm39	6.64571	0.0444919	0.0862775	1.15421	0.282669	0.376507
S100a16	6.5897	-0.0862127	0.139203	0.472749	0.491725	0.540312
Ndrg3	6.58144	0.682533	0.136334	24.5326	7.30629e-07	1.82175e-05
Shisa2	6.57905	1.18831	0.15727	52.9957	3.34273e-13	4.01584e-11
Atp5g1	6.56295	0.605132	0.122916	24.1649	8.84285e-07	2.09925e-05
Clta	6.50787	0.190013	0.105339	4.02517	0.0448261	0.116152
Nedd4	6.49181	-0.354196	0.09426	14.8527	0.00011624	0.00116666
Hexb	6.48409	0.505965	0.139929	12.8647	0.000334837	0.00278002
Hagh	6.47501	0.669406	0.152037	18.6693	1.55467e-05	0.000224945
Ndufa7	6.47263	0.158755	0.109649	2.74726	0.0974213	0.196148
Etfa	6.44541	0.553949	0.114787	23.8034	1.06691e-06	2.45917e-05
Sec61g	6.42653	0.225184	0.115238	4.22591	0.0398114	0.107097
Pdia3	6.41324	0.147547	0.125367	1.67747	0.19526	0.298954
Vcam1	6.39034	0.0666839	0.157295	0.20267	0.652574	0.674435
Ier2	6.3573	0.68943	0.231955	8.27648	0.00401618	0.019657
Cnn3	6.35683	0.44506	0.111465	16.5503	4.73777e-05	0.000553252
Dsp	6.35318	0.163166	0.119593	2.03607	0.153606	0.25782
Rpl4	6.32318	-0.0409988	0.098963	0.926408	0.335798	0.420557
Myl12a	6.29564	0.428887	0.122338	12.5565	0.000394837	0.00317511
Atp5mpl	6.28181	0.0774639	0.121007	0.738373	0.390182	0.461686
Tst	6.26974	0.308649	0.144275	4.55397	0.0328426	0.0932696
Dynll1	6.20576	0.350596	0.134805	6.84783	0.00887492	0.0362915
Rhoa	6.17061	0.114344	0.114982	1.60338	0.205424	0.308399
Ly75	6.16339	0.288566	0.15977	3.33547	0.0678008	0.154703
Cdc42	6.16125	0.199051	0.108888	4.32558	0.0375437	0.102827
Tpm2	6.15571	-0.271155	0.193124	2.0249	0.154739	0.259119
H2aj	6.10245	0.334269	0.10346	10.9446	0.000938754	0.00641671
Snx3	6.0461	0.535574	0.119867	20.4749	6.04169e-06	0.00010414
Atp6v0c	5.99121	0.324942	0.121624	7.56845	0.00593989	0.0266087
Gphn	5.96597	-0.0776015	0.116045	0.547332	0.45941	0.515002
Plgrkt	5.95791	0.525942	0.126549	17.5533	2.79369e-05	0.000367349
Fkbp1a	5.95288	0.28853	0.115643	6.96876	0.00829449	0.0344691
Serbp1	5.91607	0.178423	0.104345	3.9767	0.0461339	0.118457
Copz2	5.90985	0.842964	0.140684	34.7482	3.7522e-09	1.75007e-07
Iigp1	5.90434	0.991669	0.248795	14.4289	0.000145554	0.00139706
Hes6	5.87347	-0.70491	0.225148	10.4532	0.00122439	0.00786724
Ndufb9	5.85678	0.42023	0.116221	13.7661	0.00020704	0.00187399
Eif3f	5.83205	0.172617	0.124785	2.32083	0.127652	0.229565
Ywhae	5.81748	0.0447381	0.104264	1.20499	0.272327	0.367159
Park7	5.80447	0.230815	0.109398	5.30826	0.0212246	0.0686056
1810037I17Rik	5.79457	0.569439	0.115916	24.5096	7.39419e-07	1.83214e-05
Gm10076	5.78457	-0.0705246	0.10792	0.937136	0.333016	0.41809
Cox5a	5.77469	0.306268	0.119588	7.01097	0.00810119	0.0338076
Atp5a1	5.7527	0.00961513	0.111896	0.702485	0.40195	0.470901
Cfl1	5.67756	0.0169445	0.11566	0.551045	0.457891	0.513815
Hnrnpk	5.67711	0.178705	0.11176	3.36835	0.0664602	0.152787
Rgcc	5.6751	1.27596	0.166547	54.6755	1.42169e-13	1.81815e-11
Pebp1	5.67408	0.343103	0.132652	7.10171	0.00770105	0.0325599
Psmb5	5.66865	0.77051	0.121384	40.3985	2.07101e-10	1.28289e-08
Rpl22l1	5.66527	0.018833	0.118645	0.424066	0.514915	0.559206
Btg2	5.6373	0.709924	0.219259	9.85748	0.00169142	0.0102376
Fcgbp	5.63302	-0.567243	0.325436	3.20851	0.0732562	0.162566
Comt	5.63116	0.376465	0.106632	13.3936	0.000252483	0.00220721
Slc25a3	5.62717	0.0936473	0.117442	1.31957	0.25067	0.349166
Mt1	5.58764	-0.712138	0.250116	8.74219	0.0031093	0.016103
Cmss1	5.57483	0.100765	0.109831	0.882094	0.347629	0.429879
Tomm7	5.56266	-0.0725956	0.101827	1.46499	0.226138	0.326588
Macf1	5.555	-0.182579	0.113303	2.84161	0.0918519	0.189216
Arhgdib	5.55474	0.110766	0.146461	0.738951	0.389997	0.461662
Cox7b	5.54757	0.133815	0.113345	2.1999	0.13802	0.240478
Sppl2a	5.54576	0.10536	0.11933	1.21206	0.270924	0.366017
Arf4	5.52493	0.218611	0.135137	2.88796	0.0892436	0.1856
Pomp	5.50407	0.406176	0.115951	13.1218	0.000291878	0.00250737
Atp5pb	5.50352	0.362388	0.117534	10.3053	0.00132648	0.00842759
Psma3	5.49694	0.267434	0.109602	7.06847	0.00784521	0.0328951
Ost4	5.48605	0.21562	0.114082	4.26042	0.0390103	0.105671
Ndufa2	5.45997	0.065142	0.098262	1.25116	0.263331	0.359311
Uba52	5.45982	-0.0180025	0.115952	0.60117	0.438132	0.498453
Aplp2	5.4577	-0.230145	0.103392	5.54722	0.01851	0.0618796
Aldoa	5.45455	0.0446145	0.128399	0.493917	0.482185	0.533824
Psma2	5.44572	0.674894	0.120434	32.0251	1.52195e-08	6.07298e-07
Marcksl1	5.42679	1.15726	0.139925	66.0486	4.39938e-16	1.02596e-13
Mdh1	5.40982	0.143122	0.116771	2.03256	0.153961	0.258251
Apobec3	5.40812	0.289675	0.123135	5.75617	0.0164308	0.0566681
Smdt1	5.40404	0.160567	0.103047	3.19302	0.0739534	0.163655
Rsrp1	5.37233	-0.113827	0.111998	1.5521	0.212826	0.31489
Krt7	5.36497	-0.824337	0.18814	20.6301	5.57134e-06	9.73022e-05
Eef1d	5.36303	0.0947763	0.10916	1.5301	0.216098	0.317774
Sh2d4b	5.36099	0.0855194	0.137027	0.398246	0.527997	0.569667
Uqcr10	5.3556	-0.0973981	0.10469	1.6342	0.201123	0.304392
Cox17	5.32327	0.921539	0.11999	58.928	1.63544e-14	2.59349e-12
Gm20186	5.28101	0.989707	0.144655	45.4107	1.59759e-11	1.3334e-09
H2az1	5.27471	0.175052	0.125675	2.28824	0.130358	0.231803
Tbca	5.27147	0.479609	0.111718	19.4417	1.03716e-05	0.000159993
Ndufc1	5.26549	0.452991	0.120204	14.8488	0.000116481	0.00116761
Isg15	5.2634	0.261469	0.194517	1.8079	0.178761	0.283309
Cnbp	5.25934	0.139038	0.121797	1.88094	0.170227	0.274168
Arf1	5.25452	0.39661	0.120277	11.6581	0.000639235	0.00474194
Uqcrq	5.24379	0.00603455	0.105919	0.468753	0.493561	0.541729
Mbnl2	5.24312	0.384541	0.110766	12.6988	0.000365894	0.0029909
Ube2d3	5.23589	0.26196	0.107652	7.08995	0.00775175	0.0326815
Mrfap1	5.22885	0.15257	0.113999	2.68021	0.101602	0.200698
Dnajb1	5.22176	0.688092	0.25603	6.78228	0.00920673	0.0373211
Dpp6	5.22165	-0.316938	0.202999	2.51164	0.113008	0.21314
Gnb2	5.19763	0.735912	0.120159	38.1308	6.61561e-10	3.59282e-08
Slc25a5	5.1944	0.413253	0.129498	10.5679	0.0011507	0.0075032
Psap	5.18012	0.132119	0.114394	1.95526	0.162021	0.266832
Csrp1	5.177	0.1888	0.141106	1.98374	0.158997	0.264018
Morf4l1	5.15889	-0.063751	0.100322	1.60689	0.204929	0.307918
Pdcd4	5.15715	0.495156	0.126878	15.5999	7.826e-05	0.000851956
Nfkb1	5.14467	0.528154	0.145085	13.2051	0.000279187	0.00241141
Atf3	5.14368	0.748677	0.350722	4.21096	0.0401637	0.10766
Eif5a	5.14154	0.209662	0.12058	3.70444	0.0542678	0.133134
Ncl	5.13424	-0.0270849	0.10651	0.604292	0.436945	0.497493
Irf1	5.10437	0.764002	0.195635	14.4268	0.000145714	0.00139706
Srp14	5.09203	0.787005	0.138193	32.391	1.26067e-08	5.12607e-07
Tax1bp1	5.02991	0.219016	0.107998	5.2	0.0225869	0.0717515
Ubl5	5.01365	-0.0465005	0.107959	1.07087	0.300749	0.392275
Chd6	5.01159	-0.292576	0.105133	7.97984	0.00473012	0.0222582
Zfp36	4.9954	0.806365	0.246538	9.96221	0.00159786	0.00978048
Ndufb1	4.97478	0.151066	0.107479	2.77181	0.0959377	0.19445
Ndufa13	4.97297	0.0907808	0.0998466	1.73256	0.188084	0.292991
Mreg	4.96505	0.103917	0.121543	1.10421	0.293343	0.386237
Ndufb10	4.95644	0.164042	0.112645	2.9276	0.087077	0.182459
Pnrc1	4.95259	0.480026	0.140161	11.6944	0.000626869	0.0046627
Rtraf	4.95171	0.224118	0.123886	4.00186	0.0454502	0.117259
Cd274	4.93845	1.26576	0.178485	46.9821	7.16398e-12	6.38238e-10
Hnrnpa3	4.93746	-0.0396928	0.107062	1.31432	0.251614	0.34964
Swi5	4.93621	0.0412621	0.108897	1.00798	0.315388	0.40416
Ndufs5	4.9319	0.320334	0.10387	10.8703	0.000977172	0.00661092
Calr	4.92072	0.0142157	0.138026	0.185591	0.666612	0.686705
Akr1a1	4.90554	0.368209	0.118597	10.5962	0.00113319	0.00741814
Ppp1r2	4.89459	0.784976	0.130512	36.6603	1.40615e-09	7.10151e-08
Tma7	4.89276	0.235882	0.103879	6.26017	0.0123482	0.0463585
Tmem176a	4.86187	0.101848	0.145844	0.691592	0.405624	0.47382
Psmb2	4.85619	0.158206	0.110177	3.11517	0.0775664	0.168832
Sgpl1	4.85583	0.0114563	0.124793	0.266107	0.605955	0.633854
Pcbp1	4.85322	0.472024	0.111872	18.835	1.42526e-05	0.000210444
Sh3glb1	4.85162	0.35577	0.115705	10.1193	0.00146727	0.00910718
Cyrib	4.84355	-0.523507	0.139238	15.1937	9.70284e-05	0.00101229
Ndfip1	4.82381	0.238159	0.11059	5.74243	0.0165598	0.0569397
Rbx1	4.80122	0.477283	0.108561	20.7684	5.18304e-06	9.18794e-05
Psmb3	4.79809	0.28244	0.111611	7.35878	0.00667361	0.029251
Son	4.78822	-0.0755092	0.0874375	1.44454	0.229406	0.329642
Tcf4	4.78323	-0.156972	0.117334	2.25851	0.132882	0.235183
Xist	4.77826	0.214163	0.215011	0.97637	0.323097	0.410353
Sdc4	4.77175	0.572289	0.135809	17.9999	2.2092e-05	0.000299944
Psma4	4.74944	0.232977	0.117439	4.79073	0.0286133	0.0849955
Bsg	4.74187	0.515377	0.127293	16.9891	3.75946e-05	0.000466491
Kif5b	4.72419	0.482684	0.11441	18.6938	1.53483e-05	0.000223361
Atp5md	4.70337	0.389554	0.115197	12.6272	0.000380182	0.00307598
Eif4a1	4.69328	0.566597	0.117036	24.6564	6.85167e-07	1.72466e-05
Prdx5	4.67927	0.4461	0.140921	10.3056	0.00132626	0.00842759
Arpc3	4.67335	0.301	0.112337	8.24474	0.00408703	0.0198932
Dst	4.67147	-0.327664	0.138071	5.94614	0.0147496	0.052538
Psmb11	4.66818	-1.04237	0.192318	32.453	1.2211e-08	5.04274e-07
Lrch1	4.65386	-0.16419	0.135436	1.52087	0.217488	0.319245
Ndufc2	4.64285	0.482564	0.113471	19.1	1.24046e-05	0.000186281
Mir100hg	4.64003	-0.164846	0.16163	1.15713	0.282062	0.37613
Selenow	4.6318	-0.30235	0.159798	3.82368	0.0505331	0.126436
Atp5c1	4.62872	0.320657	0.122423	7.90211	0.00493773	0.0230301
Crip2	4.62705	-0.0583201	0.146379	0.378073	0.538637	0.578549
Icam1	4.62172	0.293612	0.145112	4.18507	0.0407815	0.108874
Top1	4.62019	0.474491	0.117019	17.2342	3.30426e-05	0.000419192
Dcxr	4.61264	0.354393	0.143669	6.26373	0.0123235	0.0462978
Map1lc3b	4.59714	-0.0937395	0.114925	1.28876	0.256276	0.353578
Psmb6	4.59557	0.442347	0.11097	16.8719	3.99897e-05	0.000487063
Grcc10	4.58883	-0.0112186	0.113027	0.674985	0.411319	0.477923
Eif2s2	4.58717	0.667591	0.118257	32.5728	1.14808e-08	4.76605e-07
Dynlrb1	4.57541	0.595661	0.114838	27.947	1.24685e-07	3.98641e-06
Eya2	4.57406	-0.232128	0.107631	4.73451	0.0295633	0.0869142
Micos10	4.56983	0.416135	0.110093	15.5833	7.89484e-05	0.000856337
Rab2a	4.5345	0.244193	0.105661	6.53677	0.0105667	0.0413338
Myl12b	4.52164	0.43422	0.107385	17.2419	3.29105e-05	0.000418185
Snhg11	4.51316	1.0055	0.188596	26.893	2.15032e-07	6.48284e-06
Ndufa6	4.50386	0.546615	0.112415	25.1084	5.41976e-07	1.40896e-05
Nedd8	4.48756	0.122033	0.105171	2.59207	0.1074	0.206995
Arpc2	4.47351	0.194751	0.118017	3.67417	0.0552616	0.135071
Bri3	4.46698	-0.0458425	0.118831	0.985571	0.320827	0.408583
Atp6v1f	4.46362	0.28439	0.111697	7.4766	0.00625061	0.0277965
Ybx3	4.43001	0.594938	0.144456	17.3504	3.10828e-05	0.000399441
Mdh2	4.42604	0.825496	0.123711	45.9939	1.18623e-11	1.01136e-09
Apoe	4.42585	-1.1561	0.233762	27.1822	1.85155e-07	5.71244e-06
Trp63	4.41138	-0.572591	0.132092	19.6189	9.45271e-06	0.000148417
Sec62	4.39357	0.164743	0.109065	3.32457	0.0682519	0.15533
Sox4	4.38439	0.5778	0.183007	9.5454	0.00200452	0.0117471
Stat1	4.36275	-0.0879789	0.118776	0.937051	0.333038	0.41809
Csnk1a1	4.35081	0.271432	0.100821	9.74738	0.00179578	0.0107381
Limch1	4.34941	0.317343	0.143693	4.88164	0.0271439	0.0819588
Ywhaz	4.34696	0.10764	0.100398	3.08006	0.0792576	0.171375
Rbms1	4.3435	0.0557959	0.112334	0.815287	0.366562	0.44386
Ezr	4.33624	0.665442	0.119216	32.6802	1.0864e-08	4.5337e-07
Nfib	4.33407	-0.0445489	0.126743	0.565567	0.452026	0.509861
Cdh4	4.32642	-0.70314	0.182678	15.8758	6.76375e-05	0.000752171
Zfp706	4.3226	0.227527	0.118078	4.79269	0.0285807	0.0849955
Arf5	4.30303	0.228378	0.114028	5.14951	0.0232529	0.0733382
Pithd1	4.29488	0.634545	0.193369	10.568	0.00115061	0.0075032
Myo10	4.29076	0.0511294	0.11554	0.253715	0.614472	0.641156
H2-Q7	4.28	-0.874298	0.19274	22.1532	2.51741e-06	5.07902e-05
Psme2	4.24543	0.618018	0.131244	22.4966	2.10516e-06	4.41354e-05
Mcc	4.2402	-0.430498	0.133125	11.0777	0.000873744	0.0060878
Ndufb11	4.23995	0.198719	0.110533	4.37837	0.0363977	0.100557
Gm56555	4.23446	0.58348	0.142951	16.8781	3.98598e-05	0.000486228
Tpm1	4.23161	-0.0692624	0.148668	0.296187	0.586283	0.618087
Mrpl52	4.22922	0.222704	0.105338	5.62158	0.0177406	0.0600234
Scand1	4.22602	0.0531291	0.103059	1.41737	0.233837	0.33389
Selenok	4.21423	0.270738	0.112096	6.85057	0.00886128	0.0362732
Etv6	4.20516	-0.0675881	0.141119	0.267273	0.605167	0.633281
Pdlim1	4.186	0.548762	0.132371	18.2372	1.95037e-05	0.000271306
Ptms	4.17294	-0.206528	0.108722	4.10134	0.0428491	0.112687
Arl6ip5	4.17163	0.555159	0.128613	19.7084	9.02041e-06	0.000143046
mt-Nd5	4.15421	0.207143	0.130891	2.50657	0.113373	0.213624
Hspd1	4.14826	0.399531	0.130905	10.2492	0.00136741	0.00863917
Pde4b	4.14627	0.392036	0.204088	3.6443	0.0562614	0.136839
Gnb1	4.12845	0.137809	0.107365	3.456	0.0630228	0.147481
Ndufab1	4.12383	0.630708	0.123696	27.3933	1.66007e-07	5.20266e-06
Fxyd3	4.12356	0.88547	0.168114	26.9971	2.03763e-07	6.21399e-06
Vamp8	4.10692	0.222942	0.118252	4.18661	0.0407444	0.108828
Ppp1r27	4.09772	2.88211	0.397521	39.9369	2.62305e-10	1.56377e-08
Clic5	4.09057	0.0312953	0.136433	0.373577	0.541061	0.580524
Eef1g	4.08166	-0.130683	0.105761	3.00349	0.0830852	0.176809
Srrm2	4.08037	-0.158032	0.0995977	3.15408	0.0757374	0.166428
Spryd7	4.06965	0.800825	0.120917	45.3319	1.66317e-11	1.37367e-09
S100a6	4.06908	-0.155607	0.303831	0.267052	0.605316	0.633354
Tomm6	4.06858	0.144816	0.112594	2.90504	0.0883033	0.1843
Stmp1	4.0597	-0.29517	0.122876	6.37171	0.0115954	0.0443726
Rbpms	4.05233	0.323276	0.119767	7.91416	0.00490494	0.0229309
Sub1	4.04855	0.715719	0.130325	31.304	2.20622e-08	8.45077e-07
Nfix	4.03865	0.32585	0.111892	9.51336	0.00203981	0.0119073
Ralbp1	4.01044	0.488595	0.112135	20.8591	4.94326e-06	8.82772e-05
Lpp	4.00896	-0.438143	0.116939	15.1532	9.91308e-05	0.0010285
Synpo2	3.99006	-0.502526	0.165568	9.66654	0.00187654	0.011137
Pard3	3.98312	-0.164166	0.132504	1.70081	0.192182	0.296296
Eif4g2	3.97987	0.141656	0.109252	2.70555	0.0999995	0.198621
S100a14	3.96306	0.11078	0.216955	0.26792	0.604731	0.633075
Tagln	3.96169	-1.76295	0.43977	18.5844
Tmem59	3.9372	0.419318	0.123642	12.5419	0.000397921	0.00319021
Nop10	3.93223	-0.145622	0.116846	2.40941	0.120608	0.221827
Jak1	3.93141	-0.2964	0.140916	4.67722	0.0305652	0.0887691
Gnai2	3.92573	0.032265	0.115426	1.24721	0.264087	0.359927
Cyb5a	3.92307	0.579425	0.138699	18.1287	2.06467e-05	0.000284214
Set	3.90202	0.305867	0.117343	8.05664	0.00453371	0.0214614
S100a13	3.89878	0.226408	0.155212	2.20598	0.137476	0.240079
Tuba1a	3.89704	0.753069	0.176514	17.5711	2.76763e-05	0.000365134
Atp5g3	3.88996	0.0876603	0.11738	1.96097	0.161409	0.266351
Cd63	3.86702	-0.603935	0.144276	18.525	1.67689e-05	0.000238708
Kcnma1	3.85764	-0.895939	0.143351	41.5613	1.1423e-10	7.61114e-09
Stox2	3.85085	0.14576	0.152106	0.957388	0.327846	0.414261
Frmd6	3.8495	-0.704947	0.211725	11.8604	0.000573417	0.00431778
Dynlt3	3.84423	0.755492	0.134241	32.9093	9.65592e-09	4.07244e-07
Frmd4a	3.8388	0.561249	0.159756	12.2466	0.000466105	0.00362632
Smim14	3.83491	0.411148	0.117283	14.2137	0.000163182	0.00153484
Palld	3.83258	0.063378	0.143753	0.560566	0.454032	0.511585
Atp5k	3.82851	-0.0897702	0.108904	1.90974	0.166992	0.271161
Prdx6	3.81846	0.315681	0.139577	5.66113	0.017345	0.0590596
Dapl1	3.80315	4.53523	0.466106	70.8736	3.80853e-17	1.37263e-14
Tceal9	3.80286	0.528419	0.145494	13.4195	0.000249018	0.00219199
Mid1	3.79871	-0.42294	0.151428	8.14442	0.00431938	0.0206689
Nfat5	3.79672	-0.0584197	0.15431	0.183156	0.668675	0.688382
Flnb	3.79197	0.225714	0.12894	3.40545	0.0649815	0.150391
Erbin	3.79132	-0.242851	0.124266	4.27467	0.0386845	0.105152
Meis1	3.79087	-0.304731	0.132688	5.59387	0.0180234	0.0606472
Snrpg	3.77415	-0.252407	0.103584	7.30796	0.006865	0.0297934
Atp5o	3.76068	0.247397	0.114853	5.96836	0.0145648	0.0521375
Ctnnd2	3.75908	-0.845441	0.137205	40.1406	2.36325e-10	1.45258e-08
Kcnq3	3.75409	-0.472057	0.293183	2.71029	0.0997031	0.198281
Vdac2	3.75044	0.73148	0.125751	35.8092	2.17622e-09	1.03947e-07
Ppib	3.74564	-0.176387	0.120389	2.99898	0.0833171	0.176974
Camk1d	3.74431	-0.0638293	0.139884	0.291511	0.589254	0.620477
Mat2a	3.73762	0.0320588	0.152044	0.130089	0.718339	0.73285
Nsa2	3.73155	0.014374	0.115486	0.83695	0.36027	0.43853
Ube2i	3.72322	0.389705	0.114596	13.3335	0.000260712	0.00227163
Eif3k	3.72033	0.32793	0.11007	10.3256	0.00131198	0.00836232
Zfp36l1	3.71275	-1.41262	0.149868	97.2059	6.24803e-23	7.07723e-20
Plaat3	3.70992	-0.0760934	0.135502	0.776331	0.378266	0.452378
Ptges3	3.70983	0.0333698	0.107226	2.0229	0.154943	0.259405
Kctd1	3.70569	-0.291787	0.108717	8.31287	0.00393651	0.0193507
Ran	3.70352	0.0924345	0.123347	1.84611	0.174236	0.27842
Romo1	3.69903	-0.0196787	0.110613	1.37829	0.240393	0.339462
Kazn	3.69776	-0.942209	0.16131	36.3485	1.65009e-09	8.07625e-08
Ociad2	3.68755	-0.197823	0.149189	2.14675	0.142872	0.245605
Vcp	3.68279	-0.0608111	0.096711	2.45201	0.117375	0.217852
Rheb	3.66526	0.232923	0.118047	5.39704	0.0201709	0.066089
H2-DMb1	3.66179	1.05644	0.135793	62.1231	3.22644e-15	6.23962e-13
Psmd7	3.65546	0.252077	0.115174	6.00756	0.0142447	0.0511996
Psma6	3.6522	0.49036	0.120413	17.8647	2.37175e-05	0.000318739
Pds5b	3.6519	-0.185714	0.240221	0.629266	0.427625	0.490716
Arpp19	3.64229	0.299077	0.105869	9.57339	0.00197418	0.0116036
Vapa	3.63844	0.405284	0.114223	15.0371	0.000105416	0.00107434
Txnip	3.62858	0.285974	0.177237	2.68898	0.101045	0.200021
D8Ertd738e	3.6221	-0.00715334	0.108617	1.39905	0.236882	0.336662
Rtn4	3.605	0.0977183	0.129566	1.32473	0.249745	0.348325
Cox6a1	3.60363	0.384078	0.114427	13.0925	0.000296487	0.00253324
Ppa1	3.60349	1.43268	0.171702	68.0454	1.59775e-16	4.22286e-14
Ube2b	3.60048	0.442344	0.105882	20.3993	6.28541e-06	0.000106036
H2-DMa	3.59749	-0.045569	0.125196	0.983749	0.321275	0.409022
Fkbp4	3.59659	0.760171	0.128237	36.9476	1.21347e-09	6.1677e-08
Srsf3	3.58752	-0.123585	0.114648	2.11708	0.145664	0.248916
Zbtb20	3.58475	-0.60171	0.134759	20.9711	4.66257e-06	8.51832e-05
Ywhaq	3.58228	0.167437	0.111241	3.85192	0.0496892	0.124916
Phlda3	3.5707	0.0450988	0.149229	0.434896	0.509596	0.554797
Ldhb	3.56346	-0.347867	0.154943	5.46886	0.0193582	0.0640081
Capg	3.55717	2.10663	0.196467	110.939	6.10264e-26	9.67757e-23
Rhob	3.55581	0.779196	0.167591	21.0605	4.45006e-06	8.18666e-05
Gsk3b	3.54949	0.0575772	0.106311	1.98044	0.159344	0.264318
Eif3h	3.54822	0.250333	0.118818	5.76706	0.0163294	0.0564163
Ssb	3.54512	0.184658	0.109162	5.1336	0.023467	0.0738081
Lima1	3.53897	-0.187883	0.125792	2.49081	0.114513	0.214854
Fgfr2	3.53545	0.109629	0.125366	1.18898	0.275536	0.370146
Mpc1	3.52851	0.42032	0.13795	10.2142	0.00139364	0.0087561
Rere	3.51699	-0.457206	0.132379	12.4765	0.000412101	0.00328067
Ubd	3.51027	-0.507375	0.302291	2.95942	0.0853786	0.18014
Smap1	3.50961	0.252124	0.114112	6.3053	0.0120377	0.045603
Castor1	3.50733	0.267632	0.173756	2.42471	0.119435	0.220336
Anp32b	3.49801	0.26171	0.10963	6.87197	0.00875583	0.0359715
Foxp1	3.48777	-0.231483	0.122959	3.8032	0.0511547	0.127441
Cct7	3.47947	0.822436	0.126434	44.9405	2.03117e-11	1.62678e-09
1700025G04Rik	3.44529	-0.419123	0.117494	13.8087	0.000202398	0.00184038
Maml2	3.44283	-0.617404	0.161711	15.4266	8.57718e-05	0.000911641
Chmp2a	3.43713	0.0806444	0.109377	1.92742	0.165041	0.269549
Pdcd5	3.43305	0.115758	0.117528	2.31468	0.128158	0.229745
Dynll2	3.42882	0.490078	0.129898	15.9401	6.53803e-05	0.000729114
Gmpr	3.42718	0.478054	0.137113	12.9991	0.000311634	0.00263321
Serpinb6a	3.41614	-0.25762	0.150263	3.45811	0.0629423	0.147436
Clic1	3.40831	-0.0661416	0.128402	1.00642	0.315762	0.404341
Pabpc1	3.4013	-0.29851	0.113504	8.17401	0.00424948	0.0204331
Oat	3.40108	0.209065	0.170291	1.67253	0.19592	0.299317
Bst2	3.39149	-0.0739145	0.169475	0.313674	0.575434	0.608836
Psmd4	3.39016	0.241867	0.111661	6.58348	0.0102929	0.0405832
Micos13	3.38854	0.304631	0.115179	8.43262	0.00368549	0.0183557
Manf	3.38412	1.13902	0.185605	36.0393	1.93376e-09	9.29261e-08
Ndufa5	3.38027	0.0147784	0.114256	1.32604	0.249511	0.348238
Dbi	3.37831	0.112144	0.150806	0.817558	0.365895	0.443335
Etl4	3.3778	-0.510846	0.151031	12.0773	0.0005104	0.00390633
Tpd52	3.37181	0.741815	0.123588	39.0347	4.16347e-10	2.35801e-08
Vdac1	3.37149	0.635447	0.129993	25.7361	3.91441e-07	1.08903e-05
Sqstm1	3.36969	0.0836734	0.136017	0.669531	0.413215	0.479224
Cbx3	3.36036	0.0620196	0.119304	1.62685	0.202139	0.305115
Sh3bgrl3	3.35633	0.0825152	0.125272	1.26725	0.260283	0.356983
Mrpl14	3.35443	0.515694	0.120845	19.7822	8.67886e-06	0.00013846
Capzb	3.35374	0.322906	0.10951	11.1351	0.000847094	0.00594917
Ndufs4	3.34541	0.387933	0.105662	16.3842	5.17152e-05	0.000595137
Paip2	3.34514	0.292895	0.118635	8.30267	0.00395868	0.0194338
Marcks	3.34511	0.291125	0.149387	4.34273	0.0371673	0.102255
Slco2a1	3.33977	-0.232268	0.134446	3.02084	0.0822011	0.17568
Lgals9	3.3346	-0.530224	0.14884	13.4041	0.000251079	0.00220222
Metap2	3.32291	0.268	0.110836	8.20211	0.00418416	0.0201925
Snrpb	3.32056	0.00973117	0.110831	1.32625	0.249474	0.348238
Glul	3.3204	0.511603	0.163231	9.62095	0.0019237	0.011349
Slc1a3	3.3197	0.191584	0.142125	1.86413	0.172149	0.276143
H1f0	3.31196	0.189914	0.153218	1.70709	0.191363	0.295773
Eloc	3.31102	0.617428	0.124781	26.7159	2.35679e-07	6.97274e-06
Rbm47	3.30442	0.294529	0.121795	6.2419	0.0124762	0.0467285
Celf2	3.30268	-0.613185	0.151952	17.0234	3.69221e-05	0.000459585
Foxn3	3.30147	0.201002	0.116348	3.63445	0.0565952	0.137314
Plxdc2	3.2972	-0.592595	0.169829	12.8118	0.000344436	0.00285077
Ndufa12	3.29323	0.362125	0.120443	10.6439	0.00110433	0.00726659
Ndufb8	3.27648	0.255309	0.116628	6.12173	0.013353	0.0489939
Bok	3.27137	0.3551	0.150816	5.93588	0.0148356	0.0527497
Ndufb7	3.26661	0.219799	0.112484	5.31637	0.021126	0.0683708
Cryl1	3.25822	1.5435	0.163416	90.8241	1.57028e-21	1.16141e-18
Jmjd1c	3.24714	-0.00282963	0.140941	0.00574809	0.939565	0.940277
Tns3	3.22861	-0.127925	0.123527	1.44062	0.230038	0.33037
Oma1	3.22804	-0.131606	0.210595	0.475074
Rbp1	3.2231	0.339243	0.213717	2.55172	0.110175	0.209803
Spcs2	3.22264	0.654132	0.148631	20.1684	7.0914e-06	0.000117631
Hcfc1r1	3.22238	0.122432	0.115341	2.53671	0.111226	0.211064
Uqcrc2	3.22158	0.624035	0.126986	26.5659	2.54699e-07	7.47965e-06
Slc38a2	3.22153	-0.416191	0.147534	8.14891	0.00430871	0.0206319
Reep5	3.21761	0.0885902	0.118605	1.41512	0.234209	0.334148
Zfr	3.21733	0.706927	0.138375	27.3438	1.70312e-07	5.31654e-06
Fosb	3.21291	0.236706	0.294529	0.638509	0.424251	0.488511
Ier3	3.2128	0.709992	0.247248	7.81361	0.00518542	0.0238349
Six1	3.21118	1.0574	0.133349	66.8298	2.95989e-16	7.11181e-14
Stx7	3.21021	0.488936	0.117839	18.3664	1.82242e-05	0.0002553
Ing1	3.20891	0.640302	0.156386	17.0659	3.6104e-05	0.000452676
Lamp1	3.20205	-0.0535231	0.134829	1.04968	0.30558	0.396165
Cetn3	3.20148	0.0914904	0.122304	1.7894	0.180999	0.285827
Drap1	3.20126	0.115241	0.110987	2.66326	0.10269	0.201542
Atp6v1e1	3.19217	0.962142	0.125366	62.9675	2.10143e-15	4.38481e-13
Selenos	3.19182	1.32659	0.169074	61.3313	4.82362e-15	8.89453e-13
Arid1b	3.18775	-0.444778	0.138598	10.8794	0.00097239	0.00658981
Mpp7	3.1849	0.0403062	0.200427	0.0685746	0.793424	0.802738
Oasl2	3.17111	0.0709561	0.121044	0.920579	0.337323	0.421711
BC031181	3.16998	0.703711	0.125587	33.6192	6.70273e-09	2.92011e-07
Enah	3.16571	-0.137235	0.12962	1.63364	0.2012	0.304392
Taldo1	3.16255	0.485333	0.134915	13.8544	0.000197533	0.00180859
Mgp	3.16191	-0.153932	0.266781	0.338788	0.56053	0.596329
Fus	3.16029	0.108618	0.10875	1.93296	0.164435	0.268992
Spop	3.15845	-0.15869	0.104142	3.32947	0.0680488	0.155046
Hsbp1	3.15517	0.17678	0.120002	4.09296	0.0430622	0.113097
Esd	3.15207	0.357206	0.120304	10.7821	0.00102487	0.00686917
Tomm20	3.15114	0.584657	0.117836	27.5826	1.50524e-07	4.73612e-06
Hdgf	3.15024	0.245859	0.124982	4.95451	0.0260227	0.0793899
Aldh2	3.14785	1.13418	0.179415	39.4192	3.41913e-10	1.97886e-08
Bex3	3.14711	0.447456	0.13683	11.4112	0.000730037	0.0052911
Galnt18	3.14216	-0.304873	0.159292	3.7516	0.0527568	0.130314
Atp1b1	3.12826	2.38863	0.268172	69.8429	6.42219e-17	1.95852e-14
Nenf	3.12698	-0.108383	0.121265	1.36046	0.243458	0.342144
Ccn1	3.11925	-0.831418	0.302518	8.15771	0.00428785	0.0205677
Baz2b	3.11454	-0.148425	0.127729	1.58349	0.208259	0.310919
Arid5b	3.10938	0.19919	0.135765	2.66758	0.102411	0.201221
Macrod2	3.10275	-1.09677	0.20279	31.9269	1.60081e-08	6.31484e-07
Rab14	3.09952	0.162677	0.111921	4.46864	0.0345225	0.0969637
Ndufb2	3.09148	-0.0188075	0.116413	1.46744	0.225749	0.326279
Rer1	3.08957	0.647843	0.130399	27.023	2.01046e-07	6.17865e-06
Eya4	3.08494	-0.369526	0.137501	7.56736	0.00594347	0.0266097
Gabarapl2	3.08482	0.588836	0.122624	25.1471	5.31191e-07	1.39314e-05
Man2a1	3.08165	-0.322218	0.160037	4.56313	0.0326673	0.0930386
Psma1	3.07724	0.492653	0.130386	16.2986	5.41032e-05	0.000616356
Snrpd2	3.07701	-0.0305665	0.110733	1.47831	0.224038	0.324635
Ascl1	3.07517	-0.896623	0.348789	7.16922	0.00741649	0.0315479
Cib1	3.07331	0.82448	0.160333	26.3726	2.81504e-07	8.09531e-06
Ly6a	3.07195	-0.351265	0.37986	0.884725	0.346911	0.429447
Bag3	3.06786	-0.0190164	0.254261	0.0149218	0.902776	0.904831
Ndufs7	3.06099	0.0576499	0.107501	2.46997	0.11604	0.216542
B230219D22Rik	3.05977	0.571283	0.129822	20.6163	5.61173e-06	9.77921e-05
Atxn1	3.05707	-0.168742	0.150785	1.32557	0.249595	0.348238
Tuba1b	3.0548	-0.159872	0.146947	1.96181	0.16132	0.266351
Pafah1b1	3.04601	0.210122	0.114854	5.32147	0.0210642	0.0682959
Ptp4a2	3.0454	0.0189747	0.115593	1.28292	0.257357	0.354576
Cops9	3.04514	0.171459	0.119894	3.49286	0.0616341	0.145297
Atrnl1	3.04422	-0.367063	0.161433	5.35535	0.0206588	0.0672705
Glrx3	3.04191	0.444099	0.136931	11.8094	0.000589322	0.00442075
Fbxo32	3.03753	1.62036	0.233436	43.6222	3.98304e-11	3.03668e-09
Tmed10	3.03489	0.156805	0.12729	2.8187	0.0931717	0.190873
Tcf12	3.0322	-0.511694	0.134256	15.2709	9.31406e-05	0.000982371
Ndufa3	3.02852	0.147653	0.109576	3.54116	0.0598635	0.142412
Septin7	3.02601	0.253678	0.114522	7.41452	0.00646994	0.0285477
Pcbp2	3.02208	-0.22533	0.103018	7.467	0.00628403	0.0278981
Anxa1	3.01973	-0.326724	0.181478	3.39937	0.0652212	0.150813
Abtb3	3.01877	-0.310366	0.148983	4.72264	0.029768	0.0872893
Kalrn	3.01686	0.0130117	0.166124	0.0192437	0.88967	0.892371
Plpp3	3.01047	-0.385347	0.135566	8.60427	0.00335376	0.0170243
Hnrnpa1	3.00917	-0.0266974	0.134092	0.930336	0.334776	0.419686
Arih1	3.00798	-0.243624	0.176441	2.10696	0.14663	0.249994
Tpm3	3.00361	0.283617	0.116576	8.02938	0.00460246	0.021722
H2-Q4	2.99676	-0.798747	0.127445	41.6561	1.08827e-10	7.36049e-09
Cds1	2.99465	0.513004	0.138377	14.7834	0.000120594	0.00120124
Dcn	2.99376	1.47871	0.310072	19.9992	7.74762e-06	0.000125883
Zfand3	2.99234	0.0616067	0.115886	1.07089	0.300744	0.392275
Parm1	2.98999	0.114241	0.143598	0.651345	0.419632	0.484669
Luc7l2	2.98991	0.0618147	0.113194	1.17109	0.279178	0.373288
Gdi2	2.98991	0.226949	0.115626	6.31822	0.0119503	0.0453586
Ndufb3	2.97699	-0.0364547	0.108902	1.55104	0.212982	0.314905
Rnh1	2.97612	0.540092	0.126712	20.4993	5.96525e-06	0.000103047
Acta2	2.97607	0.400373	0.496711	0.622667
Pard6g	2.9744	0.172592	0.11442	3.68596	0.0548723	0.134254
Agpat3	2.97224	0.943377	0.155911	37.5237	9.03067e-10	4.77361e-08
Mafb	2.97092	-0.00449435	0.171471	0.0282374	0.866552	0.870835
Tenm4	2.96306	0.106888	0.185271	0.359217	0.548941	0.586914
Pepd	2.95816	-0.135686	0.134148	1.6947	0.192982	0.296887
Psmc2	2.95582	0.552437	0.119019	25.0397	5.61605e-07	1.45522e-05
ENSMUSG00000121482	2.95349	0.657175	0.136559	24.1489	8.91649e-07	2.11041e-05
Eif4a2	2.95177	0.0189882	0.11339	1.87998	0.170337	0.274233
Mtss2	2.94563	0.529212	0.131363	16.9282	3.88214e-05	0.000476494
Rab21	2.93223	0.236711	0.120875	5.21753	0.0223604	0.0711736
Cdkn1a	2.93117	1.79342	0.303557	30.1436	4.01218e-08	1.42657e-06
Txndc17	2.93038	-0.321633	0.124847	8.09275	0.00444427	0.0211263
Dlg2	2.91935	0.217012	0.176933	1.5251	0.216849	0.318643
Trmt112	2.91898	0.155432	0.117536	3.27018	0.0705501	0.158288
Lpar1	2.91827	-0.639794	0.134776	23.8733	1.02888e-06	2.39238e-05
Mir99ahg	2.91464	-0.313144	0.146833	4.8654	0.0274004	0.0825449
mt-Nd3	2.91356	-0.204669	0.122583	2.81846	0.0931856	0.190873
Rrp1	2.90654	0.476351	0.1248	16.6937	4.39255e-05	0.000521657
Ptprd	2.90483	0.268732	0.169158	2.53285	0.111499	0.2114
Gtf2h5	2.90312	0.287289	0.118981	7.81857	0.0051712	0.0237833
Bhlhe41	2.9029	0.353631	0.180662	3.82904	0.0503719	0.126232
Prkar1a	2.89642	0.556702	0.129252	20.7236	5.30579e-06	9.32807e-05
Lmo4	2.8902	0.870529	0.15047	34.7241	3.7989e-09	1.76149e-07
Hif1a	2.88807	-0.375344	0.129041	9.01401	0.00267918	0.0144709
Ssbp3	2.88548	0.113855	0.111642	2.18625	0.139248	0.241967
App	2.88305	0.296614	0.136187	5.07374	0.0242909	0.0754714
Psma5	2.88104	0.105456	0.12287	2.2307	0.135293	0.238074
Id3	2.88083	-0.26905	0.255067	1.15474	0.282559	0.376476
Ncor1	2.88062	-0.21723	0.0978017	6.61074	0.0101365	0.0401261
Anapc13	2.87683	-0.0291377	0.115174	1.3022	0.253811	0.351355
Hnrnpu	2.86742	-0.0139316	0.117109	0.679046	0.409915	0.476848
Rabac1	2.86582	-0.296545	0.118416	7.12118	0.00761787	0.0323006
Lasp1	2.86581	-0.264918	0.117243	5.91541	0.015009	0.0532229
Srsf5	2.86004	0.147604	0.114982	3.36283	0.0666835	0.153034
Mrpl38	2.84134	0.520672	0.166912	9.72717	0.00181564	0.0108324
Psat1	2.84046	0.617076	0.172752	13.1184	0.000292404	0.00250917
Cope	2.83737	0.568283	0.129969	20.8631	4.93295e-06	8.82772e-05
Ttc3	2.83679	-0.307443	0.113838	7.88135	0.00499471	0.0231868
Btg1	2.83532	0.160578	0.161035	1.07377	0.300095	0.391808
Fis1	2.83395	0.320253	0.113282	10.0406	0.00153128	0.00940473
Grm8	2.8286	-0.439259	0.238704	3.59727	0.0578745	0.139015
Psmc6	2.82827	0.531188	0.120779	21.9395	2.81381e-06	5.59165e-05
Sox9	2.82745	0.564858	0.180297	9.7738	0.00177016	0.0106029
Ctnna1	2.82665	0.0522309	0.124399	1.49901	0.220824	0.32174
Chmp5	2.82442	0.645308	0.126831	29.1123	6.83028e-08	2.31442e-06
Hnrnpf	2.8237	0.153114	0.11985	4.09448	0.0430235	0.113033
Dync1i2	2.81961	0.201433	0.117139	4.60367	0.0319036	0.0913886
Cald1	2.81809	-0.711859	0.241793	9.17731	0.00245034	0.013655
Eif3c	2.81593	0.159101	0.119808	2.73422	0.0982196	0.19694
Psmc5	2.81586	0.467894	0.123598	16.7734	4.21201e-05	0.000506016
Fryl	2.80774	0.0255877	0.12933	0.0999644	0.751872	0.764307
Hs2st1	2.8062	-0.0987717	0.132801	1.11506	0.290984	0.384215
Timp3	2.80267	-0.0221164	0.252231	0.00897814	0.924511	0.925678
Ptov1	2.79591	0.0461995	0.117956	1.15105	0.283329	0.377058
Abracl	2.79487	0.202724	0.136087	2.90806	0.0881377	0.1841
Tubb4b	2.78972	1.03768	0.182339	32.2563	1.35118e-08	5.46608e-07
Tbl1xr1	2.7815	0.986625	0.151412	43.6935	3.84037e-11	2.95634e-09
Mpc2	2.7792	0.269151	0.123476	5.43388	0.0197498	0.0649776
Pam16	2.77169	0.587172	0.128811	23.0412	1.58564e-06	3.454e-05
Lamtor4	2.77125	0.134601	0.121038	2.87164	0.0901529	0.186833
Sulf1	2.76892	-0.158101	0.184842	0.835268	0.360754	0.438916
Fn1	2.76444	-0.267201	0.322067	0.705575	0.400917	0.469899
Nfe2l3	2.76301	0.6604	0.139443	23.241	1.42921e-06	3.14784e-05
Zfand5	2.75964	0.506169	0.160742	9.83179	0.00171521	0.0103658
Hnrnpa0	2.75284	-0.207354	0.112909	5.1201	0.0236503	0.0741491
Ranbp1	2.75248	0.44522	0.131766	13.0034	0.000310927	0.00263321
Sypl	2.74973	-0.0133251	0.125619	1.02186	0.312078	0.401699
Timm8b	2.74545	0.28702	0.118087	8.1306	0.00435243	0.0207394
Immp2l	2.74511	-0.0975386	0.208936	0.272169	0.601881	0.630815
Psmc3	2.7415	0.473261	0.123938	16.7841	4.18829e-05	0.000503929
Fmnl2	2.74056	-0.868915	0.169794	27.979	1.22641e-07	3.93692e-06
Cox14	2.73984	0.339797	0.117068	10.8197	0.00100424	0.00674663
Slc29a1	2.73342	-0.130983	0.145733	1.18824	0.275685	0.370179
Anp32a	2.72533	0.379959	0.128513	10.0459	0.00152688	0.0093971
Krt14	2.72444	-0.521009	0.326685	2.67344	0.102035	0.200981
Cltb	2.72246	1.04585	0.147938	52.0535	5.40079e-13	6.20622e-11
Tbc1d10a	2.71628	0.702511	0.145315	24.2032	8.66879e-07	2.06411e-05
Nfe2l1	2.71488	0.396446	0.133424	9.14841	0.00248934	0.0137739
Robo1	2.71132	-1.34017	0.208599	45.2494	1.73476e-11	1.41803e-09
Zfand6	2.71074	0.303599	0.117988	8.08321	0.00446772	0.0211996
Mien1	2.70953	0.401327	0.127184	11.6801	0.000631705	0.00469427
Vdac3	2.70843	0.494276	0.143595	13.1222	0.000291818	0.00250737
Tpr	2.70687	-0.0346931	0.121064	1.06106	0.302973	0.393822
Atp6v0b	2.70622	0.494353	0.136406	14.5011	0.000140079	0.0013545
Arhgap5	2.70488	0.220626	0.128709	3.58912	0.0581591	0.139487
Tox	2.69997	-0.516535	0.16168	10.6495	0.00110102	0.00725084
Ube2d2a	2.69672	0.190597	0.115995	5.23487	0.0221385	0.0706666
Ndufa1	2.69206	0.0444305	0.113854	1.415	0.234228	0.334148
Ubxn1	2.68343	0.178396	0.118268	3.93102	0.0474032	0.121089
Pgls	2.68279	0.354678	0.123334	10.179	0.00142051	0.00888402
Sf3b1	2.68017	-0.0175612	0.123123	0.769162	0.380477	0.453791
Snrpe	2.67893	0.0815743	0.113757	2.15092	0.142484	0.24528
Ndufb5	2.67669	0.0987953	0.11808	2.38985	0.122126	0.223427
Eid1	2.67299	0.259324	0.14016	4.51227	0.0336525	0.0951268
Srsf2	2.67158	0.137583	0.123037	2.03129	0.15409	0.258413
Gm15943	2.66796	0.248849	0.312048	0.623697	0.429677	0.492114
Ablim1	2.66644	-0.36827	0.129317	8.63319	0.00330092	0.0168424
Morf4l2	2.66588	0.351567	0.12903	9.44631	0.00211575	0.0122272
Nucks1	2.66308	0.0797286	0.114255	2.49155	0.114459	0.214803
Wls	2.66118	-0.232708	0.128692	4.1718	0.041102	0.109472
Ndufv2	2.66107	0.0168187	0.120658	1.71104	0.190851	0.295385
Cox7a2l	2.65335	-0.125149	0.129388	2.10966	0.146372	0.249857
1110004F10Rik	2.65146	0.210258	0.129874	4.22088	0.0399296	0.107323
Hmg20b	2.65039	0.338807	0.131728	8.41605	0.00371923	0.0184889
Rnasek	2.64886	0.487118	0.132609	15.1423	9.97054e-05	0.00103072
Spcs1	2.64679	0.108987	0.125363	2.39129	0.122013	0.223324
Rrbp1	2.64664	-0.0606812	0.116952	0.629245	0.427632	0.490716
Skp1	2.63673	0.527066	0.134242	16.5108	4.83725e-05	0.00056156
Ube2m	2.62159	0.476897	0.132347	15.2578	9.37896e-05	0.000986971
Nhs	2.62059	-0.316713	0.183007	3.07823	0.0793467	0.171428
Txndc15	2.61845	0.736387	0.161166	21.3739	3.77883e-06	7.06659e-05
Timm13	2.61712	-0.142276	0.112716	2.62153	0.105423	0.205236
Atxn7l3b	2.61658	-0.081798	0.110764	2.45963	0.116807	0.217308
Gm16685	2.61522	-0.207664	0.210253	0.99405	0.318755	0.407055
Arpc1a	2.61258	0.566366	0.128448	22.5356	2.06284e-06	4.36167e-05
Tspan3	2.61212	0.18937	0.12693	3.56753	0.0589199	0.140843
Ccdc34	2.60186	-0.0264922	0.144061	0.647432	0.421032	0.485588
Tnrc6c	2.6001	-0.211263	0.12262	3.15179	0.0758437	0.166577
Akap12	2.5995	0.826114	0.184962	19.6667	9.21943e-06	0.00014533
Dennd2b	2.58791	-0.128082	0.135146	1.05225	0.304989	0.395523
Mrpl17	2.58733	0.608733	0.131711	24.0675	9.3015e-07	2.182e-05
Mlf2	2.58524	0.728469	0.141178	29.0982	6.88012e-08	2.32138e-06
Hras	2.58491	1.37052	0.15889	79.5139	4.78848e-19	2.2334e-16
Igf1r	2.58485	-0.945639	0.157528	38.0071	7.04875e-10	3.77632e-08
Mrps24	2.57709	-0.266188	0.122705	6.54638	0.0105098	0.0412078
Prrc2c	2.57687	-0.309226	0.11175	9.04254	0.00263769	0.0143346
Swt1	2.57622	-0.428009	0.232	3.58665	0.0582454	0.139567
Nqo1	2.56598	0.837354	0.22061	14.0874	0.000174512	0.0016298
St3gal6	2.56425	0.398355	0.176429	5.70891	0.016879	0.0578116
Eif5b	2.55838	-0.139881	0.118077	2.88347	0.0894933	0.185952
Ecpas	2.55735	-0.34733	0.155244	5.24112	0.022059	0.0704996
Ddx39b	2.54839	0.292873	0.12575	7.05651	0.00789778	0.0330981
Sf3b2	2.54831	0.204149	0.119303	4.91947	0.0265557	0.0806126
Nsd1	2.54811	-0.115134	0.119049	1.11214	0.291617	0.384666
Srsf11	2.53814	0.0366132	0.107007	2.01511	0.15574	0.2603
Pax9	2.53212	0.630982	0.148826	19.1584	1.20308e-05	0.000181009
Dctn3	2.52936	0.814321	0.130795	42.5936	6.7379e-11	4.81305e-09
Pdap1	2.52333	0.302702	0.119152	8.68046	0.00321639	0.0164945
Snu13	2.52307	0.16771	0.126889	3.2686	0.0706177	0.158395
Hes1	2.52074	0.864953	0.204477	17.2617	3.25679e-05	0.000414496
6030407O03Rik	2.51979	-0.761871	0.434983	3.29204	0.0696166	0.157173
Atp1a1	2.5152	0.546575	0.151083	13.8241	0.000200742	0.00182742
Rbbp8	2.51094	-0.271436	0.139042	4.15368	0.0415441	0.110242
Nipbl	2.51029	-0.153541	0.126832	1.82067	0.177234	0.281718
Tap2	2.5098	0.0124199	0.129439	0.804702	0.369691	0.446162
Synm	2.50738	-0.311079	0.148965	4.85703	0.0275337	0.0828206
Arl6ip1	2.50478	0.188698	0.128182	3.81036	0.0509366	0.12719
Usp34	2.50301	-0.493204	0.121201	17.1531	3.44844e-05	0.000436087
Pgrmc1	2.50115	0.254573	0.130735	4.44938	0.0349138	0.0976413
Ktn1	2.49573	-0.0198706	0.131803	0.738618	0.390104	0.461662
Ifrd1	2.4956	0.593543	0.182469	10.4658	0.00121603	0.00782619
Snrnp27	2.48936	0.804522	0.137857	37.206	1.06289e-09	5.50825e-08
Ppp3ca	2.48883	-0.195347	0.131693	2.45403	0.117223	0.217673
Hdlbp	2.4887	0.212661	0.132687	3.21918	0.07278	0.161736
Sumo1	2.4847	0.0742861	0.120409	2.61193	0.106062	0.205415
3830406C13Rik	2.4837	0.398499	0.128064	10.5299	0.00117456	0.00761603
Taf10	2.48223	0.429289	0.132354	12.0319	0.000522985	0.00398343
Tuba1c	2.48179	0.581659	0.155592	14.5732	0.000134821	0.00131326
Mef2a	2.47503	-0.167575	0.131265	1.91137	0.166811	0.271047
Anapc11	2.47476	0.059779	0.126055	1.15835	0.281808	0.375918
Gnaq	2.47457	-0.334387	0.139209	6.54138	0.0105394	0.0412566
Rbbp7	2.47265	0.233138	0.121932	5.62698	0.0176861	0.0598775
Srp9	2.46837	0.339628	0.123055	9.33472	0.00224852	0.0127986
Tmem258	2.46691	0.249052	0.134874	4.60517	0.0318757	0.0913886
Atxn10	2.46292	-0.0428233	0.116706	1.9693	0.160522	0.265655
Mir205hg	2.46199	0.125051	0.152645	0.851284	0.356189	0.435434
Capns1	2.46124	0.0611428	0.120032	2.35725	0.124702	0.226427
St13	2.46106	-0.0850928	0.118162	2.5059	0.11342	0.213664
Hnrnpc	2.45712	-0.00172126	0.112797	2.83687	0.0921235	0.189421
Sap18	2.45687	0.227857	0.123168	4.80942	0.0283045	0.0845298
Cdh1	2.45623	-0.20895	0.140852	2.44811	0.117667	0.218241
Phf21a	2.45617	-0.0173583	0.14108	0.221734	0.637722	0.661326
Sdhb	2.45183	0.546886	0.131621	19.7487	8.83228e-06	0.000140625
Chst11	2.44939	-0.425379	0.150285	8.39132	0.00377017	0.0186719
Ndufa8	2.44781	0.307764	0.128113	7.87063	0.00502441	0.0232702
Rdx	2.43973	-0.00856676	0.122949	1.99514	0.157804	0.262588
AI646519	2.43812	0.0229784	0.131503	1.46135	0.226715	0.326781
Psip1	2.43203	0.107209	0.139442	2.07321	0.149905	0.253392
Clip4	2.43138	-0.380888	0.154879	6.3979	0.0114255	0.0438707
Eif3a	2.43118	0.188519	0.126451	3.35246	0.0671048	0.153645
Ndufb6	2.42903	0.248805	0.121994	6.37741	0.0115582	0.0442515
Maml3	2.42897	-0.600706	0.163813	14.0244	0.000180456	0.00167742
Ccl19	2.4287	-0.869536	0.305933	8.70588	0.00317185	0.0163309
Zfhx3	2.42843	-0.00914872	0.125454	0.466645	0.494535	0.542675
Cycs	2.42634	0.660672	0.141109	23.7512	1.09626e-06	2.50497e-05
Eif3i	2.42626	0.179871	0.126243	3.76856	0.0522246	0.129321
Pdzd2	2.42568	1.07528	0.196273	29.4171	5.83616e-08	2.01809e-06
2410006H16Rik	2.42411	0.0280283	0.155762	0.409026	0.522464	0.565506
Rbm3	2.41842	0.175175	0.133657	2.81516	0.0933778	0.191168
Nsd3	2.41804	-0.328234	0.144798	5.65161	0.0174394	0.0591939
Cpne8	2.4172	0.496234	0.160942	10.1787	0.00142073	0.00888402
Chd9	2.41601	-0.521677	0.135233	15.4856	8.31345e-05	0.00089008
Gpx1	2.41448	0.198556	0.1448	2.20577	0.137495	0.240079
Ppp1ca	2.41035	0.0656547	0.125869	1.88138	0.170178	0.274144
Dpy30	2.40972	0.392755	0.130244	10.9181	0.000952304	0.00648933
Gadd45g	2.40966	-0.773961	0.299955	7.1363	0.00755389	0.0320465
Efna5	2.40685	-0.952658	0.176882	31.1373	2.40411e-08	9.03423e-07
Nol7	2.40089	0.0638785	0.120209	2.00813	0.156458	0.260985
Shisa6	2.39976	0.695496	0.221082	9.63502	0.00190902	0.0112876
Sarnp	2.39963	0.393554	0.119481	13.9177	0.000190987	0.00175677
Ube2r2	2.39941	0.075438	0.119509	2.21944	0.136282	0.239014
Zc3h15	2.39771	0.369136	0.124884	11.1619	0.000834939	0.00588465
Ndufv3	2.39751	-0.0432056	0.117627	1.62076	0.202986	0.305868
Mrpl20	2.39449	0.479896	0.127163	16.4304	5.04689e-05	0.000582486
Rap1a	2.39422	-0.0831772	0.125507	1.20653	0.27202	0.367147
Zcrb1	2.39373	0.831179	0.141881	36.9798	1.19361e-09	6.10591e-08
Hspb11	2.38869	0.439835	0.139606	11.03	0.000896499	0.00619733
Exoc4	2.38837	-0.420312	0.155535	7.89104	0.00496802	0.0231442
Mrps21	2.38832	0.0795268	0.121929	2.09267	0.148007	0.251672
Sesn3	2.38811	0.00546036	0.137615	1.4236	0.232811	0.332966
Isl1	2.38651	0.330884	0.157801	4.94988	0.0260925	0.079572
Dipk1a	2.3814	-0.56226	0.152201	14.3116	0.00015491	0.00146748
Cct8	2.38137	0.220536	0.124043	6.11581	0.0133978	0.0490901
Snrpd1	2.38135	0.000800987	0.118577	1.94405	0.16323	0.268071
Srrm1	2.37925	0.0898885	0.114666	3.51535	0.0608028	0.144041
2610307P16Rik	2.37906	0.150796	0.183525	0.673102	0.411972	0.478192
Tubb5	2.37844	0.60927	0.172636	12.6746	0.000370661	0.00301742
Smim29	2.37627	0.252759	0.145536	3.67782	0.0551409	0.134859
Gm56730	2.37583	0.620707	0.153179	17.5671	2.77349e-05	0.000365299
Matr3	2.37481	-0.0943572	0.117498	1.96778	0.160684	0.265707
Napa	2.37353	0.815126	0.153509	29.9863	4.35103e-08	1.54015e-06
Lrrc42	2.37023	0.117163	0.14362	1.09218	0.295989	0.388531
Cebpb	2.3696	1.1225	0.17722	40.4195	2.04885e-10	1.27916e-08
Rexo2	2.36889	0.429632	0.144943	10.4163	0.00124909	0.00800611
Csrp2	2.36848	-0.10347	0.222296	0.229644	0.631788	0.656546
Stat3	2.36782	-0.384622	0.152103	6.6952	0.00966731	0.0386936
Syngr1	2.36733	0.740738	0.190166	15.4846	8.31819e-05	0.00089008
Fbxl17	2.36676	-0.451047	0.150233	9.5384	0.00201217	0.0117833
Ctnnb1	2.36594	-0.00601033	0.114737	2.0349	0.153724	0.257964
Nktr	2.36448	-0.264078	0.128919	4.53018	0.033302	0.0942369
Ccl11	2.36298	3.33426	0.812101	11.5542
Dad1	2.3616	0.0354311	0.123338	1.76347	0.184192	0.289544
Trir	2.35939	0.554418	0.130722	20.2676	6.73311e-06	0.000112631
Phgdh	2.35824	0.170617	0.147803	1.87461	0.170949	0.274828
Pten	2.35544	-0.0814576	0.119153	2.20469	0.137592	0.240195
mt-Nd4l	2.35528	-0.15508	0.133003	1.3699	0.241829	0.34064
2610016A17Rik	2.35466	0.843098	0.151527	32.4239	1.23952e-08	5.06606e-07
Hmgn2	2.35373	-0.0654375	0.141036	0.955866	0.328231	0.414522
Hadh	2.35364	0.569614	0.138683	19.683	9.14102e-06	0.000144381
Uqcrfs1	2.34797	0.476069	0.140092	13.2457	0.000273213	0.00237014
Scp2	2.3441	0.229341	0.13124	5.31933	0.0210902	0.0682959
Sod2	2.34369	0.260467	0.133305	5.84745	0.0155996	0.054499
Cnpy2	2.34275	0.432969	0.140664	10.5681	0.00115057	0.0075032
Arl1	2.34203	0.232898	0.128943	5.46593	0.0193907	0.0640621
Rbm25	2.3381	-0.413845	0.110354	15.564	7.97582e-05	0.000861584
Cct5	2.3377	0.101503	0.127294	2.78752	0.0950012	0.193145
Txnl1	2.33381	0.336594	0.131706	9.22846	0.00238282	0.0133708
Jpt1	2.33257	-0.365978	0.127397	8.81558	0.00298669	0.0156623
Gls	2.33249	-0.145264	0.181294	0.649481	0.420298	0.485081
Ide	2.3297	-0.157901	0.130915	2.63194	0.104734	0.20444
Hnrnpab	2.32856	0.230879	0.121067	5.66085	0.0173477	0.0590596
Ubxn4	2.32485	-0.00188602	0.127208	1.31637	0.251245	0.349434
Kansl1	2.32299	-0.619963	0.139576	20.428	6.19178e-06	0.00010558
Ostc	2.31465	0.340156	0.151044	5.91012	0.0150541	0.0532638
Vcl	2.31366	-0.0513799	0.2088	0.0985609	0.753563	0.765732
Ywhab	2.3119	0.12125	0.12302	4.03278	0.0446244	0.115781
Pfdn1	2.3114	0.218942	0.122287	5.20518	0.0225197	0.0715871
Tagln2	2.30866	1.0187	0.210197	22.8093	1.78898e-06	3.83373e-05
Ube2k	2.30844	-0.0392599	0.109466	2.37747	0.123097	0.224376
H2-DMb2	2.30843	-1.32399	0.184448	56.0821	6.95069e-14	9.66878e-12
Srsf7	2.30502	0.180647	0.138271	1.88251	0.170049	0.274088
Klhl29	2.30347	-0.459392	0.165843	8.14876	0.00430905	0.0206319
Cfdp1	2.30284	0.123257	0.114796	3.63627	0.0565335	0.137314
Eif3m	2.30003	-0.0167694	0.125479	2.18367	0.139481	0.242157
Atrx	2.2997	-0.247216	0.124272	4.76034	0.0291228	0.086066
Cdk4	2.29732	0.245068	0.14023	4.31054	0.0378769	0.103561
Mrps7	2.29647	0.29395	0.132348	6.42688	0.0112406	0.0432654
Lars2	2.29605	0.435315	0.193922	5.07901	0.0242172	0.0752916
Magi1	2.29553	-0.604373	0.164628	14.0295	0.000179963	0.00167676
Pdgfa	2.29548	-0.158056	0.130799	2.15479	0.142126	0.244982
Maged1	2.29479	0.0846268	0.133804	1.20405	0.272515	0.367209
Dnajb6	2.29148	0.506109	0.123183	19.1852	1.18629e-05	0.000179164
Pdcd10	2.2885	0.0330045	0.119403	2.43019	0.119018	0.219976
Purb	2.2885	0.325661	0.125805	8.9771	0.00273384	0.0146464
Tubb2b	2.28601	0.761207	0.224117	11.2921	0.000778366	0.00556505
Prnp	2.28599	-0.238088	0.129168	4.82511	0.0280481	0.0839222
Ift20	2.28569	0.371246	0.134681	9.48164	0.00207539	0.0120555
Arpc1b	2.28482	0.625683	0.159999	16.6079	4.59588e-05	0.000538268
Snx29	2.28236	-0.676391	0.169902	16.6589	4.47391e-05	0.000526315
Rac1	2.28076	0.563514	0.130355	22.4925	2.10964e-06	4.41354e-05
Ly6d	2.27908	3.66062	0.541455	33.5399	6.9818e-09	3.02507e-07
Trim29	2.27899	0.113932	0.131035	2.10312	0.146999	0.25028
Aimp1	2.276	0.133984	0.123163	2.80355	0.094056	0.192098
Hadhb	2.27545	0.449918	0.148831	10.7392	0.00104888	0.00697701
Ifi35	2.27457	-0.164639	0.132249	2.36575	0.124024	0.225548
Rbfox2	2.274	-0.116167	0.15163	0.924855	0.336203	0.420858
Snrpf	2.27363	-0.0696365	0.116438	2.19628	0.138344	0.240978
Snrpd3	2.27308	0.27233	0.125376	6.43577	0.0111845	0.0431247
Pigp	2.2688	0.18447	0.120502	4.04544	0.0442908	0.115179
Aamp	2.26781	0.394805	0.133806	11.3428	0.000757424	0.00546462
Tpm4	2.26753	0.274441	0.139609	5.08397	0.0241481	0.0751747
Mtdh	2.2636	-0.188002	0.122441	4.27707	0.0386299	0.10504
Atp6v1d	2.26111	0.485112	0.132806	15.8433	6.88099e-05	0.000762002
Tmbim4	2.26092	0.526199	0.139663	15.8652	6.80195e-05	0.00075536
Gtf2i	2.25979	-0.230309	0.11271	5.10183	0.0239006	0.0745508
Aff1	2.25578	-0.420317	0.146493	8.5284	0.00349646	0.0176022
Pdia6	2.25492	0.12067	0.177018	0.827682	0.362944	0.440836
Polr1d	2.2548	0.479731	0.131634	15.6636	7.56651e-05	0.000829805
Aopep	2.25449	-0.172746	0.141161	1.5599	0.211679	0.313962
Bcl7c	2.24986	0.17908	0.118283	4.5552	0.0328189	0.0932534
Arpc5	2.24236	0.634679	0.133606	25.2391	5.06461e-07	1.35666e-05
Gem	2.24187	-0.870774	0.244614	13.5268	0.000235178	0.00209284
Arhgef10l	2.2413	0.176791	0.165161	1.17165	0.279062	0.373196
Adamts9	2.23829	0.0411358	0.211962	0.0400905	0.841304	0.848258
Syf2	2.23737	0.367896	0.125062	11.0359	0.000893635	0.00618972
Vps13a	2.23593	-0.558803	0.123225	21.3951	3.73721e-06	7.00528e-05
Tiam1	2.23523	-0.641293	0.162986	16.033	6.22464e-05	0.000698093
Cfl2	2.23396	-0.15409	0.133867	2.75547	0.0969226	0.195678
Prpf19	2.23136	1.30898	0.175689	57.2317	3.87381e-14	5.68805e-12
Commd3	2.23004	0.570888	0.153458	15.5748	7.93059e-05	0.000859039
Htra1	2.22896	-0.42126	0.237728	3.29587	0.0694542	0.157148
Srp19	2.22744	0.570353	0.135718	20.2443	6.81569e-06	0.000113372
Ap2s1	2.22731	0.267808	0.131195	6.07091	0.0137426	0.0499839
Irf2bp2	2.22515	0.280106	0.133578	5.53337	0.0186571	0.0622349
Krtcap2	2.2251	0.200574	0.147452	2.39549	0.121686	0.222866
Psmd11	2.22334	0.222943	0.135841	4.61352	0.0317208	0.0911614
Mrps33	2.22175	0.394785	0.129462	11.4845	0.000701802	0.00512393
Psmd12	2.22101	0.380786	0.148287	8.29845	0.0039679	0.0194567
Rsrc2	2.2194	0.189039	0.124046	3.23938	0.0718879	0.160292
Elavl1	2.21808	0.0938231	0.134286	1.74712	0.186239	0.290973
Ucp2	2.21773	0.737145	0.176588	17.8856	2.34593e-05	0.000315805
Atp2b1	2.21519	-0.134196	0.139015	2.04223	0.152985	0.256974
Rnf11	2.2138	0.276825	0.125378	7.64625	0.00568903	0.0257028
Rala	2.21301	0.41128	0.126897	13.1126	0.000293322	0.00251433
Psenen	2.21051	0.125217	0.126985	2.44773	0.117695	0.218242
Pura	2.2098	-0.12979	0.125002	2.70024	0.100333	0.199084
Rab10	2.20694	-0.205004	0.121201	5.37888	0.0203819	0.0666376
Il11ra1	2.20566	0.26143	0.173058	2.2994	0.129424	0.231198
Sfrp1	2.20412	-1.07205	0.193068	33.0308	9.07093e-09	3.84617e-07
Hebp1	2.20377	-0.101365	0.146173	1.42203	0.23307	0.333171
Tcea1	2.2012	-0.0348563	0.121462	1.88043	0.170285	0.274206
Iscu	2.19785	0.339308	0.12877	8.85006	0.0029308	0.015451
Errfi1	2.19533	-0.272413	0.201591	1.86538	0.172005	0.276122
Ssr4	2.19404	0.291519	0.135821	5.76133	0.0163827	0.0565514
Cct4	2.19289	-0.262946	0.125105	6.54097	0.0105418	0.0412566
Csnk2a1	2.19251	0.327699	0.128628	8.93729	0.00279407	0.0149086
Ddx6	2.19156	-0.366075	0.128111	9.04058	0.00264053	0.0143402
Ankrd11	2.18879	-0.0320468	0.12978	0.235504	0.627472	0.652917
Rora	2.18819	-0.950121	0.182571	28.7344	8.30175e-08	2.74269e-06
Ier5	2.18603	0.476986	0.211891	4.92965	0.0263996	0.0802147
Ddt	2.18422	0.184445	0.132383	3.4977	0.0614542	0.14515
Zfyve21	2.1838	0.158264	0.15523	2.12896	0.144539	0.247687
Nfe2l2	2.18311	0.511405	0.150468	12.99	0.000313167	0.00263321
Cxxc5	2.18215	0.414276	0.144802	8.93995	0.00279	0.0148969
Mrpl18	2.18208	0.594603	0.137236	21.6051	3.34968e-06	6.35397e-05
Eno1	2.18188	-0.252194	0.146119	3.68583	0.0548766	0.134254
Senp6	2.18157	-0.116889	0.12771	2.08539	0.148714	0.252159
Pabpn1	2.18112	0.093649	0.122682	1.58563	0.207951	0.310634
Eif5	2.17948	0.446677	0.139994	11.7948	0.000593977	0.00445146
Cck	2.1787	2.48429	0.55502	15.5612
Arid4b	2.17585	0.0406869	0.135097	0.850506	0.356409	0.435578
Cd81	2.17289	1.68445	0.234122	49.6792	1.81054e-12	1.88891e-10
Etnk1	2.17242	-0.19426	0.145615	2.38884	0.122204	0.223468
Atp2a2	2.17207	0.267396	0.16251	2.98176	0.0842076	0.178334
U2af1	2.17146	0.18076	0.12754	3.82998	0.0503436	0.126201
G3bp1	2.16849	-0.309847	0.115555	8.87136	0.00289679	0.0153329
Bcap31	2.16587	0.344716	0.127211	9.37333	0.00220165	0.0125861
Ldha	2.16338	-0.0576308	0.144019	1.10355	0.293487	0.386298
G3bp2	2.1591	-0.183337	0.121942	3.85138	0.0497051	0.124917
Sec11c	2.15619	0.561456	0.159331	12.9926	0.000312724	0.00263321
Adh5	2.15614	0.327482	0.140294	7.07261	0.00782713	0.0328541
Srgn	2.15457	-1.06021	0.28415	15.1579	9.88836e-05	0.0010285
Phip	2.15307	-0.170883	0.129155	2.33691	0.12634	0.228033
Ppp1r12a	2.15287	-0.31836	0.133979	6.10633	0.0134699	0.0491951
Tnrc6b	2.15264	-0.316123	0.128124	6.60036	0.0101958	0.0403206
Papss1	2.14816	0.482118	0.135857	14.8671	0.000115358	0.00116076
Cwc15	2.1461	0.391054	0.128506	11.1879	0.000823309	0.00582339
Eif4g3	2.14418	0.218023	0.125984	3.72329	0.0536586	0.132007
Fabp4	2.14409	1.45665	0.836402	2.56949
Cox20	2.14192	0.0874915	0.133564	2.2907	0.130152	0.23154
Psmc4	2.14075	0.445224	0.135443	12.6065	0.000384411	0.00309756
Pcmtd1	2.13965	-0.251512	0.1239	4.88312	0.0271206	0.0819197
Hey1	2.13882	1.22196	0.193469	40.4315	2.03631e-10	1.27916e-08
Ube2n	2.13657	0.373319	0.124851	12.6902	0.000367584	0.00300162
Eif3e	2.13649	0.0647198	0.124796	3.09992	0.0782962	0.169984
Pls1	2.13536	1.4968	0.183401	70.0064	5.9111e-17	1.87477e-14
Socs3	2.13352	0.231554	0.277268	0.703165	0.401722	0.470774
Dact2	2.13312	0.0921445	0.18471	0.725083	0.394482	0.465176
Hspa4	2.13186	0.156042	0.127871	2.94436	0.086178	0.181296
Cux1	2.13156	-0.130793	0.132428	1.89849	0.168248	0.272142
Msi2	2.13023	0.0320253	0.147965	0.319596	0.57185	0.60561
Rgs4	2.12965	2.98674	0.380166	52.0237	5.48362e-13	6.21137e-11
Slc4a4	2.12782	0.487962	0.216098	5.24039	0.0220684	0.0704996
Dlg1	2.12553	-0.331909	0.15005	5.81417	0.0158976	0.0553101
Pcbd2	2.12531	0.418584	0.144676	9.52179	0.00203047	0.0118663
Tbcb	2.12487	0.406456	0.130276	12.0032	0.000531105	0.00403286
Cdk2ap1	2.12475	0.446735	0.141985	11.5409	0.000680809	0.00500291
Klf4	2.12189	0.626662	0.326208	3.49848	0.0614253	0.145125
Clk1	2.11973	0.134244	0.15414	0.925417	0.336057	0.420814
Usp15	2.11634	0.146264	0.149167	1.38945	0.238498	0.337964
Smad1	2.11495	-0.3892	0.130733	9.23768	0.00237085	0.0133134
Dctn2	2.11322	0.143867	0.126038	4.13184	0.0420835	0.111227
Ociad1	2.11194	0.524339	0.122087	22.8514	1.75021e-06	3.76083e-05
Golgb1	2.10972	-0.0368767	0.131634	0.649323	0.420355	0.485081
Kcnk2	2.10931	-0.959713	0.154427	41.6505	1.09137e-10	7.36049e-09
Exoc7	2.10887	0.755069	0.164301	22.4658	2.13921e-06	4.46364e-05
Dnaja2	2.10847	0.462605	0.124299	17.3223	3.15468e-05	0.000404095
Cdc37	2.1082	0.0940005	0.122802	3.04197	0.0811373	0.174158
Abi1	2.1079	0.371999	0.150113	6.76608	0.00929066	0.0375462
Mrps14	2.10725	0.358697	0.128913	10.8244	0.0010017	0.00674232
Nectin1	2.10718	-0.301041	0.124058	6.56889	0.0103776	0.0407954
Rapgef2	2.10704	-0.541866	0.180703	9.3028	0.00228804	0.0129677
Cct2	2.10698	0.40057	0.130741	11.6557	0.000640059	0.00474302
Lpcat2	2.10692	0.148595	0.156599	1.46282	0.226482	0.326654
Mgll	2.10651	-0.13054	0.230246	0.454175	0.500359	0.546918
Cmip	2.10286	-0.01797	0.140373	0.0890538	0.765384	0.77635
Bcas2	2.10089	0.192556	0.132119	4.30686	0.037959	0.103714
Itga6	2.10053	-0.71509	0.187674	15.1387	9.98927e-05	0.00103131
Ext1	2.09911	-0.430686	0.169173	6.98733	0.00820887	0.0341602
Thoc7	2.09682	0.465385	0.13766	13.9664	0.000186108	0.00171787
Polr2k	2.09574	0.297385	0.132821	6.23061	0.0125561	0.0469166
Mtarc2	2.09174	0.26143	0.141676	4.68146	0.0304898	0.0886326
Ust	2.08943	0.00660405	0.17004	0.291292	0.589394	0.620542
Ndufs3	2.08928	0.182805	0.127407	4.1376	0.0419407	0.110923
Chmp4b	2.08871	0.198004	0.124295	5.05253	0.02459	0.0761319
Sf3b5	2.0855	0.259227	0.129519	5.30415	0.0212747	0.0687115
Rab18	2.08428	0.494653	0.133011	17.2808	3.22435e-05	0.000411688
Erp29	2.08188	0.0422869	0.128632	1.78678	0.18132	0.28622
Igfbp7	2.07991	-0.50533	0.375308	1.91454	0.166459	0.270629
Trafd1	2.07885	0.266552	0.128728	6.0842	0.0136396	0.0496777
Ndufs6	2.07769	0.0622043	0.121063	1.74492	0.186517	0.29135
Pclo	2.07722	-0.795876	0.147773	30.2283	3.84071e-08	1.37176e-06
Arpc5l	2.07471	0.305552	0.131464	7.85333	0.00507271	0.0234528
Rnpepl1	2.07398	0.558053	0.159203	12.6625	0.000373065	0.00302719
Washc3	2.07333	0.0963066	0.134231	1.58915	0.207447	0.310173
Tmed2	2.07157	0.600465	0.154372	16.8081	4.13565e-05	0.000499111
Wac	2.07142	0.033666	0.132338	1.19952	0.273418	0.367945
Unc119	2.07082	0.21311	0.172069	2.08326	0.148922	0.252361
Cyc1	2.07061	0.406568	0.137941	11.1479	0.000841248	0.00591334
Stard5	2.06985	1.18309	0.182394	43.7699	3.69351e-11	2.87116e-09
Mrpl51	2.06733	-0.0823259	0.131307	2.34243	0.125893	0.227589
Prmt1	2.06666	0.495315	0.14069	14.1336	0.000170279	0.00159403
Abhd6	2.06367	0.495472	0.155951	10.8989	0.000962205	0.00653196
Sptbn1	2.0632	-0.187512	0.139945	2.57986	0.108231	0.207838
Lrpap1	2.06269	0.244367	0.147901	3.30553	0.069047	0.156645
Egln2	2.06131	0.871577	0.160843	31.5805	1.91337e-08	7.36461e-07
Sfpq	2.06059	-0.158095	0.118916	2.51645	0.112664	0.212795
Pfdn2	2.05609	0.455841	0.123866	16.1845	5.74629e-05	0.00065089
Calm3	2.05514	0.421369	0.138047	11.1901	0.000822356	0.00582339
Gadd45b	2.05336	0.834951	0.281806	8.22974	0.00412094	0.0200092
Lamtor2	2.05141	0.26944	0.12693	7.30971	0.00685832	0.0297913
Naa20	2.05095	0.143566	0.129138	3.37315	0.0662669	0.152475
Picalm	2.04297	0.0753663	0.154062	0.419863	0.517005	0.560708
Twf1	2.04261	0.358439	0.142256	8.22176	0.0041391	0.0200728
Bax	2.04145	0.444048	0.147371	10.2507	0.00136636	0.00863917
Phb2	2.03891	0.18015	0.140509	3.34758	0.0673039	0.153968
H2az2	2.03844	0.0718246	0.125207	1.33589	0.24776	0.34647
Tspo	2.03829	-0.929708	0.19105	25.2983	4.9115e-07	1.33826e-05
Serpinh1	2.03636	-0.000816435	0.164191	0.420694	0.516591	0.560412
Mtch1	2.03532	-0.217891	0.13785	3.69867	0.054456	0.133513
Jup	2.0345	0.331765	0.139848	7.29704	0.00690682	0.0299421
Gsn	2.03433	0.911345	0.222709	16.3049	5.39239e-05	0.000615606
Ccnd2	2.03338	0.98613	0.298034	10.2146	0.00139334	0.0087561
Csde1	2.03199	-0.0237155	0.124215	1.42723	0.232217	0.332369
Chd3	2.03127	0.121245	0.140406	0.927336	0.335556	0.420422
Uqcc2	2.03123	-0.0415308	0.135938	0.608108	0.435501	0.49649
Ccl19-ps2	2.02897	-0.586331	0.323709	3.45023	0.063243	0.147791
Aff4	2.02647	0.0343645	0.132692	0.854002	0.355423	0.435014
Arhgdia	2.02574	-0.0187408	0.130112	2.02874	0.154349	0.258683
Tbl1x	2.0221	-0.209154	0.144115	2.73696	0.0980512	0.196673
Rex1bd	2.02029	-0.0670918	0.132578	1.38254	0.23967	0.338981
Rab1a	2.01917	0.0742604	0.124732	2.54531	0.110622	0.21029
Tmcc3	2.01774	0.205639	0.178982	1.30753	0.252842	0.350549
Mrpl30	2.0163	0.0860952	0.126888	1.64027	0.200288	0.303766
Ankrd12	2.01507	-0.400445	0.134147	9.74337	0.0017997	0.0107454
Lancl1	2.01208	-0.254571	0.146759	3.79731	0.051335	0.127717
Clic4	2.01039	0.55208	0.185224	8.89851	0.00285404	0.0151673
Ppp1r10	2.01003	0.212287	0.156505	1.89968	0.168114	0.27198
Grip1	2.00963	-1.40524	0.203908	52.3762	4.58243e-13	5.34325e-11
Clstn1	2.00628	0.139563	0.125474	2.86012	0.0908008	0.187775
Ppp1cb	2.00525	0.167529	0.130108	3.354	0.0670418	0.153575
Sntb2	2.00286	0.0836013	0.16233	0.891692	0.345019	0.428317
Suclg1	2.00215	0.307802	0.140686	6.74642	0.00939361	0.0378657
Ap2m1	1.99995	-0.0238361	0.125238	1.69139	0.193418	0.297282
Rnf7	1.99992	0.239213	0.130438	6.22699	0.0125818	0.0469605
Cachd1	1.9992	-0.276532	0.182914	2.42734	0.119235	0.22012
Arl3	1.99801	-0.172723	0.127945	3.61879	0.0571303	0.137976
Pde4d	1.99767	-0.822461	0.199885	17.96	2.25591e-05	0.00030472
Hgsnat	1.99689	0.410953	0.165645	6.70046	0.00963881	0.0385991
Ppic	1.99519	1.12999	0.174733	43.57	4.09059e-11	3.08898e-09
Wnk1	1.9942	-0.228464	0.146385	2.64182	0.104084	0.203473
Fbxw7	1.99249	-0.267255	0.172997	2.54219	0.110841	0.210555
Pycard	1.99216	0.0122385	0.149642	0.780443	0.377006	0.451348
Med28	1.99081	0.495291	0.137413	15.1304	0.000100335	0.00103453
Dnajc3	1.99064	0.656541	0.158092	18.4376	1.75557e-05	0.000246371
Arhgef12	1.9843	-0.370819	0.131867	8.72575	0.00313748	0.0161855
Usp18	1.98399	0.240297	0.155262	2.7992	0.0943111	0.192376
Ppm1h	1.97767	-0.234478	0.165309	2.29397	0.129877	0.231502
Ep400	1.97766	-0.340798	0.195521	3.09651	0.0784601	0.170115
Ufc1	1.97666	0.283587	0.127296	7.29705	0.00690679	0.0299421
Uqcrc1	1.97539	0.172571	0.13515	2.95071	0.0858396	0.180824
Trappc4	1.97283	0.565968	0.136846	20.2584	6.76543e-06	0.000112933
Tulp3	1.971	-0.0276916	0.139506	0.605507	0.436485	0.497281
Dmrt2	1.97095	0.667486	0.161423	17.7363	2.53742e-05	0.000336441
Psmg4	1.97049	-0.129071	0.128852	2.5054	0.113457	0.213677
Vav3	1.96946	0.306414	0.189779	2.68416	0.101351	0.200352
Cnih4	1.96788	-0.0694335	0.160351	0.369093	0.543499	0.582509
Plekha5	1.96613	-0.208184	0.140533	2.54612	0.110565	0.210233
Pard3b	1.96569	-0.462672	0.183974	6.54186	0.0105365	0.0412566
Sra1	1.96507	0.22148	0.132197	4.33574	0.0373203	0.102534
Tulp4	1.96446	0.232491	0.134042	4.4983	0.0339287	0.0958249
Ppp2ca	1.96298	0.206843	0.122957	5.82293	0.0158186	0.0551321
Ech1	1.9628	0.144724	0.134601	2.68838	0.101083	0.200021
ENSMUSG00000121513	1.96186	-0.666764	0.183256	13.867	0.000196218	0.00179863
Cct6a	1.96102	0.344113	0.128489	9.84762	0.00170052	0.0102848
Tcf7l2	1.96015	0.371148	0.158823	6.15907	0.013074	0.048328
Sparc	1.9598	-0.0735673	0.209163	0.201814	0.653261	0.674968
Lims1	1.95753	0.12927	0.154101	0.876506	0.349161	0.43076
Fkbp8	1.95729	-0.0227647	0.125241	1.89796	0.168307	0.272148
Susd6	1.95729	-0.448286	0.160598	8.32653	0.00390703	0.0192415
Txn2	1.95222	0.380061	0.141064	9.77346	0.00177049	0.0106029
Cd24a	1.95175	2.77835	0.326923	67.5663	2.03719e-16	5.21061e-14
Map3k20	1.94999	-0.208887	0.142986	2.49452	0.114243	0.214551
Akirin2	1.94946	0.352364	0.137592	9.27381	0.00232454	0.0131237
Ddr1	1.94835	0.252896	0.130582	5.32026	0.0210789	0.0682959
Tmem234	1.94821	-0.020055	0.120549	1.83502	0.175536	0.279652
Reps1	1.9473	-0.317005	0.139097	5.88346	0.0152838	0.0537644
Cacybp	1.94523	0.0428336	0.137538	2.20717	0.137371	0.240021
Yy1	1.94369	0.0575064	0.125779	2.62005	0.105521	0.205236
Churc1	1.9433	0.600413	0.160888	14.5832	0.000134103	0.00130788
Pgam1	1.94301	0.0171814	0.137426	2.04822	0.152384	0.256204
Strn3	1.94299	-0.238466	0.1385	3.66046	0.0557182	0.135935
Actr10	1.94115	0.380764	0.135164	10.6294	0.00111305	0.00731183
Kmt2e	1.94059	-0.302046	0.127992	6.15224	0.0131246	0.0484473
Polr2a	1.93979	0.17683	0.22219	0.632923	0.426285	0.489715
Nme1	1.93941	-0.206996	0.145851	3.40983	0.064809	0.150079
Higd2a	1.9384	0.457248	0.142251	12.2307	0.000470107	0.00364724
1700019D03Rik	1.93638	0.893633	0.221318	16.2221	5.63329e-05	0.000639003
Arl8a	1.9328	0.667655	0.142486	25.6565	4.07924e-07	1.13092e-05
Mtpn	1.92928	0.296893	0.134326	8.62872	0.00330904	0.0168729
Rtn3	1.92709	0.113099	0.139263	2.14852	0.142708	0.245558
Capza2	1.92648	0.119544	0.129219	3.83973	0.0500515	0.125628
Prpf40a	1.92055	0.272181	0.140899	4.78878	0.0286457	0.0850363
Csnk2b	1.91889	0.521947	0.133033	18.493	1.70528e-05	0.000241449
H2-Q6	1.91861	-1.42806	0.1712	74.9337	4.86789e-18	2.03145e-15
Tfdp2	1.91799	-0.59187	0.141778	18.8076	1.44593e-05	0.000212705
Dusp1	1.91742	0.772298	0.348785	4.59449	0.0320748	0.0916804
Sptssa	1.9167	0.241258	0.143247	4.5576	0.0327729	0.0932387
Nkx6-2	1.91067	1.39146	0.415972	9.81203	0.00173374	0.010438
Smarca5	1.91001	0.0228415	0.143893	0.440632	0.506818	0.552629
Snrnp70	1.9094	-0.110346	0.11948	2.79727	0.0944247	0.192417
Ahnak	1.90646	-0.600366	0.14351	18.2817	1.90532e-05	0.000265506
Arl15	1.90614	-0.313646	0.167626	3.65075	0.056044	0.136394
Enho	1.90605	1.12713	0.225598	24.4939	7.45455e-07	1.83563e-05
Dip2b	1.90559	0.0412206	0.139786	0.490108	0.483879	0.535027
Gucy1a2	1.90552	-0.878524	0.191532	22.3168	2.3118e-06	4.76112e-05
Mtln	1.90401	0.0617063	0.139277	1.67563	0.195506	0.298954
Timm17a	1.90305	0.977558	0.146623	50.5362	1.16989e-12	1.28834e-10
Hspb8	1.89464	0.736781	0.17764	18.098	2.09819e-05	0.000287829
Hprt	1.89235	0.256905	0.138182	4.99667	0.0253961	0.0779278
Mrpl57	1.89136	0.8673	0.144303	41.3179	1.29376e-10	8.54854e-09
Foxn1	1.88923	-0.0416574	0.16095	0.232642	0.629572	0.654615
Brd2	1.88791	0.0492714	0.153041	0.212812	0.644572	0.667382
Ache	1.88605	0.0687729	0.15542	0.487112	0.485218	0.53591
Nudc	1.88597	0.0453294	0.132168	2.22615	0.135692	0.2384
Lncpint	1.88007	-0.293901	0.155801	3.78456	0.0517274	0.128573
Klf6	1.87654	0.65779	0.260505	6.21782	0.0126471	0.0471456
Mrps16	1.87584	-0.000113705	0.133103	1.62685	0.20214	0.305115
Bzw1	1.87489	0.0755316	0.12785	2.65665	0.103118	0.202168
Plekha7	1.87388	-0.181899	0.155582	1.48647	0.222765	0.323617
Hypk	1.87346	0.49146	0.134281	15.8229	6.95564e-05	0.00076883
Ube2l3	1.87204	0.365485	0.131523	10.5091	0.00118785	0.00767603
Etfb	1.87103	0.148958	0.130241	2.89807	0.0886854	0.184855
Prpf4b	1.87058	-0.154516	0.134613	1.4296	0.23183	0.332216
Arglu1	1.87029	-0.394161	0.124866	11.0918	0.00086712	0.00605229
Prkn	1.86928	-0.604896	0.215503	8.44878	0.00365289	0.0182391
Adss	1.86891	0.26184	0.147283	4.43943	0.0351179	0.0980803
Rab7	1.86673	0.168975	0.135369	4.00855	0.04527	0.117035
Wasf2	1.86411	-0.155506	0.121061	2.99892	0.08332	0.176974
Pdlim3	1.86372	-0.324184	0.303391	1.17576	0.27822	0.372762
Scx	1.86308	0.462266	0.310796	2.13399	0.144065	0.247196
Scmh1	1.86139	-0.626122	0.150035	18.6345	1.58327e-05	0.00022825
Mycbp2	1.8602	-0.490643	0.137225	13.4358	0.000246863	0.0021797
Ube2e1	1.86019	0.191323	0.129958	4.38829	0.0361867	0.100113
Huwe1	1.85897	-0.310594	0.136429	5.58233	0.0181426	0.0609029
Nrtn	1.85775	0.281264	0.179664	2.74004	0.0978625	0.196394
Spg21	1.85714	0.308537	0.144888	6.82625	0.00898276	0.036638
Rab15	1.85632	0.614182	0.143908	21.6314	3.30405e-06	6.31273e-05
Canx	1.85539	0.0955542	0.143704	1.48346	0.223233	0.323942
Psmd1	1.85524	-0.102401	0.131473	2.49231	0.114404	0.214751
Nufip2	1.85463	-0.079287	0.15976	0.295096	0.586974	0.618569
Snx9	1.85424	0.214424	0.142568	4.09884	0.0429128	0.112779
Rab6a	1.85366	0.688385	0.156625	21.7333	3.13312e-06	6.11885e-05
Hnrnpdl	1.85306	0.0864255	0.135598	0.77214	0.379556	0.453443
Alyref	1.853	0.206393	0.136708	4.21242	0.0401291	0.107603
Ppp1r15a	1.85242	0.636554	0.256686	5.96061	0.0146289	0.052272
Runx1	1.85073	0.439918	0.194668	5.03896	0.0247834	0.0765965
Sfxn1	1.85004	0.52272	0.166839	11.1218	0.000853175	0.00598128
Ppdpf	1.84798	0.0307227	0.143357	1.28646	0.256701	0.353795
Lrp6	1.84728	-0.173415	0.143361	2.14204	0.143311	0.246116
Ccser1	1.84626	-1.19919	0.233075	29.0788	6.9493e-08	2.33479e-06
Usp9x	1.84487	-0.0411856	0.143895	0.533227	0.465253	0.520016
Fezf2	1.84482	0.102539	0.339243	0.0922253	0.761367	0.772869
Rras	1.84292	-0.17412	0.14279	2.80756	0.0938212	0.19168
Rock1	1.84219	-0.27681	0.133507	5.45721	0.0194877	0.0643556
Dnajc13	1.84161	-0.190818	0.176489	1.48026	0.223735	0.324372
Tapbp	1.84087	-0.178531	0.135826	3.01373	0.0825621	0.176119
Ptpn13	1.8406	0.108382	0.147383	0.839627	0.359504	0.438
Krcc1	1.8394	0.50795	0.142427	15.2565	9.3855e-05	0.000986971
Mrpl33	1.83885	0.139108	0.129715	2.60205	0.106726	0.206146
Rp9	1.83859	-0.0924902	0.125939	1.82018	0.177292	0.281718
Sugt1	1.83639	0.296062	0.132532	6.58048	0.0103103	0.0406001
Tra2b	1.83579	-0.155885	0.13777	1.96983	0.160466	0.265623
Tmem167	1.83484	0.456864	0.14141	12.4703	0.000413464	0.00328822
Pkm	1.8337	-0.185011	0.144989	2.77841	0.0955429	0.193929
Znrf2	1.83156	0.0869413	0.139554	1.02387	0.311602	0.4013
Wdr83os	1.8249	0.296325	0.133932	7.22603	0.00718539	0.0308629
Tecr	1.82444	0.282523	0.156384	4.45443	0.0348108	0.0974973
Myh9	1.82429	-0.303176	0.143171	4.5983	0.0320036	0.0915758
Tnks2	1.82358	0.294856	0.138372	5.49373	0.0190848	0.0632867
Map3k5	1.82256	0.0976899	0.151961	0.594512	0.44068	0.50038
Psmd8	1.82229	0.367005	0.139752	9.2845	0.00231101	0.0130769
Dleu2	1.82212	0.56515	0.229799	5.88726	0.0152508	0.0536963
Pak2	1.82146	0.129238	0.135706	2.44156	0.118159	0.218665
Akap9	1.82122	-0.021783	0.132089	1.13491	0.28673	0.380322
Bag1	1.81967	0.175656	0.132781	3.01796	0.0823468	0.175896
Irf8	1.81805	-0.290361	0.162599	3.89939	0.0483036	0.12256
Tcf25	1.81608	0.0170687	0.124351	1.17752	0.27786	0.372343
Rhoc	1.816	0.616162	0.176503	12.9935	0.000312573	0.00263321
Zmynd8	1.81499	-0.148368	0.13891	1.43532	0.230899	0.331426
Itgb1	1.81435	-0.153061	0.141764	2.29138	0.130094	0.23154
Tmed9	1.81428	0.110467	0.14331	2.06766	0.150452	0.254008
Zranb2	1.81405	0.196959	0.136518	3.08025	0.0792484	0.171375
Ndufs8	1.81392	0.0316129	0.130336	1.80318	0.179329	0.283755
Mrpl3	1.81211	0.257612	0.156973	4.01001	0.0452309	0.116972
Hnrnpl	1.80937	0.465832	0.136164	13.6132	0.000224602	0.00201456
Sfr1	1.80806	0.25907	0.147262	4.83969	0.0278119	0.0834042
Hadha	1.8076	0.3488	0.143634	7.94659	0.0048178	0.0226172
Vps29	1.80701	0.273958	0.132352	6.46306	0.011014	0.0426704
Commd1	1.80642	0.180475	0.128935	4.35662	0.0368654	0.101636
Echs1	1.80415	0.326628	0.154262	6.14292	0.0131939	0.048545
Cbx1	1.80258	0.0597884	0.134483	1.727	0.188795	0.293521
Polr2f	1.80207	0.0313247	0.126823	1.73187	0.188172	0.29307
Tenm3	1.79973	-0.672667	0.22956	9.09883	0.00255773	0.014025
Golga4	1.7991	0.20317	0.147516	2.42496	0.119417	0.220336
Wbp4	1.7968	0.434589	0.135062	13.0327	0.000306092	0.00260095
Tomm22	1.79635	0.157887	0.138852	3.41945	0.0644326	0.149487
Gtf2a2	1.79622	0.392945	0.137865	10.2818	0.00134352	0.00851541
Sec31a	1.7961	-0.0614632	0.128814	1.42927	0.231883	0.332216
Serp1	1.79608	0.754776	0.167433	22.445	2.1625e-06	4.50039e-05
Kitl	1.7957	-0.0919163	0.180093	0.783884	0.375956	0.450431
Fnbp1l	1.79561	-0.578845	0.137527	18.4749	1.72155e-05	0.000242454
Naa38	1.7955	-0.0311623	0.139495	1.80027	0.17968	0.284255
Xrcc5	1.79487	0.372562	0.140462	9.16096	0.00247233	0.0137221
Xaf1	1.79266	-0.387528	0.168218	5.67779	0.017181	0.058618
Mbd3	1.79163	0.203274	0.13581	4.53139	0.0332787	0.0942044
Glod4	1.79035	0.223255	0.140969	4.63232	0.031375	0.0904957
Hsdl2	1.7893	0.952079	0.165331	36.3992	1.60767e-09	7.91751e-08
Sltm	1.78868	0.121468	0.133113	1.99007	0.158334	0.263137
Srp72	1.78848	0.760577	0.145385	31.2155	2.30913e-08	8.76459e-07
Pitpnb	1.7882	0.34357	0.144573	8.07868	0.0044789	0.02124
Mrps6	1.78799	0.0196122	0.159082	0.650295	0.420007	0.484892
Slc25a13	1.78614	0.0442174	0.157455	0.61366	0.433413	0.495103
Utrn	1.78487	-0.121582	0.159039	0.907605	0.340751	0.424947
Jph1	1.78484	-0.524269	0.160454	10.8541	0.000985776	0.00666344
Pik3r1	1.78331	-0.637988	0.151752	19.3448	1.09115e-05	0.000167295
Osbpl6	1.78312	0.580079	0.195837	8.99792	0.00270287	0.0145493
Prelid1	1.78224	0.0609449	0.137789	2.1959	0.138378	0.240979
Wapl	1.78071	0.18235	0.132848	3.4344	0.0638518	0.148557
Suco	1.78012	0.434134	0.168149	7.68561	0.0055663	0.0253214
Id2	1.77892	0.34909	0.28696	1.46301	0.226452	0.326654
Siva1	1.77868	0.027134	0.168613	0.441922	0.506196	0.552309
Ube4b	1.7786	0.286017	0.149937	4.39019	0.0361464	0.100071
Pbrm1	1.77855	0.081113	0.135327	1.98493	0.158872	0.263921
Dtymk	1.77776	0.216228	0.138039	4.75914	0.0291431	0.0860937
Eya1	1.77576	-0.064044	0.172616	0.260347	0.609882	0.63687
Pstpip2	1.77502	-0.40116	0.173193	5.80845	0.0159494	0.0554417
Tmem223	1.77407	0.158033	0.150822	2.05333	0.151874	0.255562
Ash1l	1.77282	-0.240048	0.136616	3.71201	0.0540221	0.132613
Hnrnph3	1.77272	0.356932	0.132875	8.87344	0.0028935	0.0153257
Llph	1.7715	0.25494	0.140942	4.79025	0.0286213	0.0849955
Papola	1.77057	-0.0361281	0.133205	2.08363	0.148885	0.252354
Spats2	1.77022	0.500157	0.208927	5.80432	0.0159869	0.0555477
Tra2a	1.77001	-0.0911051	0.149343	0.559172	0.454594	0.511913
Rab11b	1.76889	0.0825943	0.128822	3.17224	0.0748996	0.165252
Aurkaip1	1.76632	0.346637	0.137752	8.19626	0.00419768	0.0202454
Tmem256	1.76595	-0.349859	0.145501	7.10442	0.00768943	0.0325344
Amotl1	1.76435	0.00843256	0.163095	0.735203	0.391202	0.462478
Dsc3	1.76198	0.0297283	0.15715	0.814215	0.366877	0.443982
Setd5	1.75689	-0.35364	0.148338	6.29217	0.0121272	0.0458326
Mrpl53	1.75661	1.11662	0.154125	60.8259	6.23517e-15	1.0751e-12
Fstl1	1.75366	0.182621	0.169888	1.20477	0.272371	0.367159
Zfp91	1.75219	0.238422	0.133843	5.03599	0.0248259	0.0766257
Birc2	1.75205	-0.674198	0.141969	22.9899	1.62855e-06	3.53776e-05
Elf1	1.75198	0.051906	0.139225	0.930324	0.334779	0.419686
Rin2	1.75178	-0.401508	0.158058	6.76115	0.00931639	0.037631
Tor1aip2	1.75129	0.406857	0.149682	8.18286	0.00422879	0.0203583
Riok3	1.75082	-0.146767	0.129724	2.92513	0.0872102	0.182568
Vps28	1.74879	0.157279	0.138545	2.73358	0.0982587	0.19694
Ciao2b	1.74826	0.726395	0.151849	24.7851	6.40903e-07	1.63667e-05
Bmpr1a	1.74794	-0.17285	0.15094	1.92721	0.165064	0.269549
Mrpl23	1.74682	0.293395	0.142232	5.86708	0.0154266	0.0541469
Rbbp4	1.74634	0.240508	0.13421	6.02863	0.0140757	0.050892
Acat1	1.74618	0.136911	0.150827	2.33733	0.126306	0.228033
Tmem50a	1.74462	0.0672782	0.138203	1.61795	0.203378	0.306186
Parp8	1.74442	-0.239784	0.164904	2.15391	0.142207	0.245015
Cobl	1.7429	0.142627	0.172569	1.12621	0.288585	0.38213
Cenpx	1.74263	0.279001	0.14956	4.68864	0.0303627	0.0883472
Mxd4	1.74207	-0.450924	0.135272	12.4165	0.000425565	0.00336086
Stub1	1.74203	0.492583	0.140686	15.0989	0.000102023	0.00104785
Fgf21	1.74132	0.482804	0.358992	1.7291	0.188526	0.29339
Chchd1	1.73914	0.186843	0.140583	3.40825	0.064871	0.150179
Cops6	1.73876	0.192464	0.134178	4.37003	0.0365763	0.10098
Eif4e	1.73614	0.485227	0.137332	14.6346	0.000130498	0.00128536
Mrpl42	1.73455	0.2988	0.142705	6.3477	0.0117533	0.0447866
Hnrnph1	1.73418	-0.14311	0.124533	2.25527	0.13316	0.235522
Zmynd11	1.73067	-0.139971	0.126763	3.41876	0.0644595	0.149488
Mical3	1.73051	-0.367029	0.142505	6.68071	0.00974616	0.0389502
Srpk2	1.72959	-0.091107	0.136592	1.9999	0.15731	0.262025
Kcnj15	1.72935	0.257794	0.170257	2.4287	0.119132	0.220099
Tmem30a	1.72911	0.270464	0.139405	6.13639	0.0132427	0.0486726
Eif4h	1.72908	-0.0723242	0.133033	2.96641	0.0850105	0.179688
Srsf10	1.7287	0.468574	0.13504	15.2703	9.31698e-05	0.000982371
Mllt10	1.72677	-0.586602	0.141562	17.7532	2.51501e-05	0.000334589
Cox16	1.72474	-0.323062	0.133055	7.3234	0.00680624	0.0296683
Tspan5	1.72282	0.19945	0.205052	0.941789	0.331818	0.416889
Ubn1	1.72279	0.104381	0.137569	2.41559	0.120133	0.22121
Gm4951	1.72211	0.0107847	0.252613	0.0342563	0.853163	0.858686
Diaph1	1.72178	0.0201479	0.15074	0.430279	0.511852	0.556565
Relb	1.72138	-0.214796	0.148095	2.62442	0.105231	0.205107
Luc7l3	1.72119	-0.258619	0.133703	4.20016	0.0404201	0.108128
Ralb	1.72035	0.344747	0.157223	6.23647	0.0125146	0.0468499
Luzp1	1.71811	-0.368353	0.134334	8.47623	0.00359818	0.0180102
Bcl2	1.71708	0.0539626	0.189191	0.22784	0.63313	0.657424
Timm10b	1.71626	0.185538	0.140025	3.44229	0.0635477	0.148146
Dpysl2	1.7135	-0.213556	0.234912	0.955746	0.328261	0.414522
Smim11	1.71324	-0.287599	0.133347	6.18945	0.0128514	0.0476609
Ubl3	1.71255	0.21282	0.137983	4.04263	0.0443647	0.11522
Rab5if	1.71243	0.409684	0.13928	12.7507	0.00035587	0.00291799
Naxe	1.71001	0.1961	0.136748	3.71024	0.0540797	0.132714
Acadl	1.70814	0.145595	0.133315	3.74886	0.0528436	0.130447
Actr3	1.70748	-0.121896	0.131271	2.85976	0.0908208	0.187775
Puf60	1.70734	0.347609	0.135274	9.26015	0.00234194	0.013179
Spacdr	1.70704	0.140524	0.1359	1.69114	0.19345	0.297282
Mrps28	1.70697	0.432636	0.140392	12.1424	0.000492882	0.00379677
Magoh	1.70548	0.0527854	0.134986	2.15546	0.142064	0.244981
Eny2	1.70539	0.273634	0.134834	6.16723	0.0130138	0.0481506
Kcmf1	1.70511	0.261665	0.129812	6.57241	0.0103571	0.040735
Aox2	1.70341	4.80285	0.544078	86.4086	1.46345e-20	8.92589e-18
Cct3	1.70309	0.141447	0.133489	3.26069	0.0709595	0.158797
Lamtor1	1.70271	0.222052	0.144569	4.74791	0.0293339	0.0864127
Pnpla8	1.7027	-0.424533	0.131926	12.0416	0.000520252	0.00396642
Gtf2e2	1.70262	0.471022	0.181779	7.64751	0.00568507	0.0256995
Kdelr2	1.70202	0.720944	0.165906	20.9919	4.61221e-06	8.46533e-05
H2-T22	1.69927	-0.487082	0.165935	9.19123	0.00243178	0.0135786
Hnrnpm	1.69862	0.0175938	0.133744	2.01383	0.155871	0.260464
Ppp1r11	1.6984	0.088325	0.139721	1.70995	0.190992	0.29549
Nop58	1.6975	-0.023763	0.17767	0.44503	0.504705	0.551061
Grpel1	1.69719	0.387328	0.140393	10.7712	0.00103089	0.00690368
Higd1a	1.69678	-0.0340131	0.147779	1.60416	0.205315	0.308323
Sp100	1.69481	-0.692096	0.147298	23.2065	1.45508e-06	3.19594e-05
Lsm12	1.69366	0.420708	0.140984	11.4091	0.000730855	0.00529219
Actn1	1.69326	-0.992679	0.147995	47.0436	6.94241e-12	6.25527e-10
Hnrnpd	1.69309	0.00344712	0.128405	1.80964	0.178551	0.283145
Coa3	1.691	0.127194	0.135639	3.32753	0.0681291	0.155127
Cuta	1.6885	0.208493	0.13694	4.2305	0.0397036	0.107005
Brk1	1.68791	-0.130752	0.133622	3.64733	0.0561592	0.136633
Gm12216	1.6853	-0.076457	0.182824	0.395135	0.529613	0.57079
Chd4	1.68358	-0.0709482	0.174156	0.17102	0.679207	0.697685
Ube2h	1.682	0.172607	0.146003	1.80472	0.179143	0.283564
Trappc6b	1.68173	0.784002	0.155379	28.9217	7.53656e-08	2.51082e-06
Evl	1.68115	0.222795	0.150697	3.33486	0.067826	0.154716
Cltc	1.68015	-0.269501	0.140899	4.15635	0.0414787	0.110105
Tcp1	1.67644	0.39374	0.141232	10.2334	0.00137923	0.00870001
Hnrnpr	1.67407	-0.10555	0.128664	2.98787	0.0838905	0.177947
Rchy1	1.67215	-0.132011	0.132062	2.49915	0.113907	0.214123
Psmb8	1.67084	-1.09093	0.187144	36.5462	1.49091e-09	7.4819e-08
Dctn1	1.66939	-0.129758	0.184207	1.14294	0.285031	0.378879
Vars	1.66929	-0.280767	0.145212	3.90339	0.0481887	0.122464
Dpm1	1.66784	0.216027	0.138539	4.6019	0.0319365	0.0914497
Macroh2a1	1.66776	0.198767	0.13935	3.38554	0.0657707	0.151774
Snx6	1.66728	0.108058	0.136279	2.54226	0.110836	0.210555
Sipa1l1	1.66331	0.077188	0.16395	0.504621	0.477477	0.529498
Mrpl48	1.66148	0.606974	0.136891	23.5614	1.20991e-06	2.71767e-05
Acin1	1.66074	-0.146582	0.126543	2.62731	0.105039	0.204834
Khdrbs1	1.66042	0.0846247	0.133989	2.25445	0.133231	0.235537
Setbp1	1.66023	-0.144325	0.188398	0.659591	0.416704	0.482018
Smarcb1	1.66001	0.218566	0.13462	4.17502	0.0410242	0.109301
Chchd3	1.65998	-0.0391078	0.142539	1.56805	0.21049	0.312836
Pkp4	1.65985	-0.37879	0.148338	6.67497	0.0097776	0.0390098
Stk39	1.65939	0.685028	0.175285	16.6829	4.41783e-05	0.000521657
Chrac1	1.65897	0.116709	0.136176	2.4675	0.116223	0.216678
Socs1	1.65821	0.704592	0.212907	10.9489	0.000936616	0.00640762
Slc3a2	1.65606	0.650253	0.154991	19.5216	9.94667e-06	0.00015525
Ddx3x	1.65585	-0.222557	0.160495	2.0282	0.154403	0.25872
Atf4	1.65503	0.402149	0.162845	6.54881	0.0104955	0.0411769
Rock2	1.65495	-0.00576346	0.168272	0.839795	0.359455	0.438
Cd83	1.65474	0.0180863	0.350708	0.0366676	0.848143	0.854393
Chka	1.65439	-0.278407	0.268317	1.10723	0.292684	0.385562
Strbp	1.65402	-0.0265319	0.152362	0.456616	0.49921	0.546114
Crim1	1.6539	-0.561614	0.203724	7.97644	0.00473901	0.0222869
Sri	1.65276	-0.296557	0.14613	5.1442	0.0233241	0.0735336
Adm	1.65256	-0.887423	0.306123	9.0338	0.00265033	0.0143666
Mob4	1.65119	0.666941	0.14982	23.0586	1.57142e-06	3.43244e-05
Ndufs2	1.6508	0.0200041	0.141665	1.62989	0.201719	0.304885
Rbm8a	1.64982	0.182561	0.134858	4.11973	0.0423857	0.111802
Ifi30	1.64777	-0.117631	0.16789	0.708526	0.399934	0.469302
Map2k2	1.647	0.144812	0.133807	2.55224	0.110138	0.209803
Psmd6	1.64634	0.440274	0.142515	13.6214	0.000223623	0.00201032
Kif1b	1.64574	-0.0593827	0.154972	0.633315	0.426142	0.489643
Crebbp	1.64546	-0.481248	0.133775	13.3995	0.000251689	0.00220513
Ptprk	1.64455	-0.789215	0.168744	22.7275	1.86675e-06	3.97888e-05
Cyb5r3	1.64446	0.438333	0.16222	9.00501	0.00269241	0.0145127
Plekhj1	1.64446	0.760189	0.156218	26.9077	2.1341e-07	6.4585e-06
Lacc1	1.64317	0.427117	0.156044	7.90853	0.00492022	0.0229755
Arhgap24	1.64222	1.29291	0.259873	23.8947	1.0175e-06	2.37287e-05
Srsf9	1.63977	0.366078	0.1368	9.91573	0.00163872	0.00994902
Pcnp	1.63969	0.373635	0.136818	11.5382	0.000681797	0.00500553
Skint10	1.63834	-1.03043	0.311199	11.876	0.000568624	0.00428576
Rap1b	1.6382	0.0328068	0.13425	2.57043	0.108878	0.2085
Ube3a	1.63816	0.134177	0.144766	2.57626	0.108478	0.20806
Smad4	1.63808	0.377414	0.172628	5.58915	0.018072	0.0607432
Kdelr1	1.63787	0.189316	0.146206	3.2098	0.0731983	0.16252
Resf1	1.63778	0.169289	0.181262	1.17052	0.279294	0.373381
Stag1	1.63714	-0.537701	0.144208	14.8644	0.000115524	0.00116095
Erh	1.63698	-0.0774985	0.143188	2.8168	0.0932821	0.191021
Pde6d	1.63607	1.03945	0.174276	38.2124	6.34494e-10	3.51034e-08
Lamtor5	1.63593	-0.162153	0.129725	3.18889	0.0741406	0.164024
Lsm8	1.63518	1.16272	0.167563	54.627	1.45716e-13	1.83394e-11
Mat2b	1.63465	0.349262	0.148631	7.6845	0.00556972	0.0253224
2210016L21Rik	1.63458	0.00796426	0.144516	0.566548	0.451634	0.509606
Mcrip1	1.63402	0.131497	0.144538	2.76155	0.0965544	0.195201
Psme1	1.63345	-0.308376	0.196794	2.48356	0.115042	0.215737
Dcun1d5	1.63335	0.0374888	0.134645	2.71145	0.0996302	0.198186
Tacc2	1.63185	0.256769	0.176298	2.2878	0.130395	0.231816
Irf2	1.6314	-0.264858	0.127491	4.89271	0.0269704	0.0815592
Nisch	1.63131	-0.22406	0.137849	3.15931	0.075495	0.166139
Tmem254	1.62809	0.584522	0.162489	14.6564	0.000128993	0.00127213
Cd151	1.62783	0.480392	0.153296	11.755	0.000606793	0.00453038
Rad51b	1.62618	2.00948	0.263453	57.6782	3.08702e-14	4.70711e-12
Ssu72	1.62568	0.276212	0.1445	5.98423	0.0144344	0.0517406
Hpf1	1.62273	0.477675	0.140383	14.2099	0.000163506	0.00153607
Kif21a	1.62253	0.321298	0.158622	5.32725	0.0209945	0.0681396
Tob1	1.62179	0.239787	0.153573	2.79752	0.0944103	0.192417
Derl1	1.62171	0.652869	0.159318	18.7729	1.47247e-05	0.000215807
Psmd14	1.62134	0.201698	0.136644	4.77339	0.0289028	0.0855752
Eif6	1.62075	0.048907	0.14579	1.71794	0.189958	0.294422
Hsph1	1.6201	-0.589842	0.247498	5.90379	0.0151083	0.0533884
Tbrg1	1.61997	0.18931	0.136262	3.6598	0.0557404	0.135948
Vgll4	1.61938	0.376488	0.151856	7.18365	0.00735707	0.0313962
Clint1	1.61915	-0.0155032	0.136338	1.34921	0.245416	0.344164
Nop53	1.61868	0.209457	0.130308	4.14671	0.0417155	0.110507
Spock2	1.6186	-0.369483	0.164428	6.05941	0.0138324	0.0502184
Banf1	1.61732	0.111286	0.13766	2.29723	0.129605	0.2314
Ccdc186	1.61211	0.486582	0.160632	10.9551	0.000933486	0.00639172
Daam1	1.61158	-0.577502	0.151748	15.0373	0.000105407	0.00107434
Mier1	1.61148	-0.0548387	0.137579	1.0754	0.299729	0.39146
Mvb12a	1.61089	0.086863	0.135121	1.30885	0.252602	0.350384
Id1	1.61065	0.214923	0.345633	0.386695	0.534042	0.574703
Med10	1.61042	0.281398	0.147237	5.97898	0.0144774	0.0518479
Fxr1	1.60968	0.0151397	0.136231	1.45738	0.227347	0.327514
Gpi1	1.60913	-0.0812141	0.13483	2.46828	0.116165	0.216621
Dennd1a	1.6091	-0.657148	0.163353	17.0629	3.61611e-05	0.000452676
Psmd13	1.60897	0.354476	0.143594	8.404	0.00374397	0.0185653
Copb2	1.60893	0.113005	0.139491	2.74854	0.097343	0.196148
Lsm3	1.60872	0.904114	0.168693	31.9306	1.59778e-08	6.31484e-07
Mylip	1.60411	0.45912	0.163033	8.20471	0.00417819	0.0201759
Cd47	1.60372	-0.517602	0.14088	15.8211	6.96204e-05	0.00076883
Zhx2	1.60342	0.14293	0.153613	1.01865	0.31284	0.402353
Septin11	1.60326	0.17527	0.14602	2.5278	0.111856	0.211699
Egfr	1.60002	-0.775751	0.157105	26.0143	3.38901e-07	9.59695e-06
Cetn2	1.59948	-0.0863478	0.135211	2.87925	0.0897277	0.186281
Ubap2l	1.59936	-0.249691	0.127137	5.49702	0.0190489	0.0632754
Creb3l2	1.59923	0.125854	0.145925	1.87016	0.171457	0.275422
Zswim6	1.59885	-0.276056	0.193596	2.26154	0.132622	0.234881
Oxr1	1.59796	-0.231554	0.153352	2.4174	0.119994	0.22105
Mbd2	1.59682	-0.481738	0.134336	14.421	0.000146162	0.00139797
Marchf5	1.59613	0.127169	0.145125	2.5567	0.109827	0.209584
Pnrc2	1.59577	0.16758	0.146729	3.49534	0.0615419	0.14528
Rraga	1.59504	0.391705	0.150516	9.32656	0.00225856	0.0128398
Grb2	1.59323	0.306351	0.136052	7.18649	0.00734545	0.0313635
U2surp	1.59305	-0.0634619	0.12582	1.4213	0.233189	0.333205
Zfp318	1.59231	-0.161013	0.18475	0.77746	0.377919	0.452032
Cap1	1.59204	0.603313	0.14922	19.0945	1.24402e-05	0.000186462
Kcnn3	1.59137	-0.00665805	0.190739	0.225683	0.634743	0.658754
Birc6	1.59073	-0.331124	0.141399	5.82065	0.0158391	0.0551793
Hspa9	1.58945	-0.138906	0.145692	2.37912	0.122967	0.224242
Hsd17b10	1.58809	0.0323317	0.157147	1.72652	0.188855	0.293557
Immp1l	1.58674	-0.0843008	0.132672	2.74628	0.0974808	0.196148
Ndfip2	1.58447	0.186195	0.146885	3.90752	0.0480706	0.12236
Rbis	1.57842	-0.108449	0.130693	2.26641	0.132206	0.234195
Trappc2l	1.57703	0.491934	0.148774	13.4642	0.000243163	0.00215423
Nckap1	1.57576	-0.180739	0.148485	2.21509	0.136668	0.239422
Ddx24	1.57508	-0.0770026	0.131959	1.68604	0.194124	0.297891
Fto	1.57483	-0.0256878	0.160625	0.272638	0.601568	0.63068
Eprs	1.5745	-0.0501286	0.141256	1.57273	0.20981	0.312235
Carhsp1	1.5739	1.25433	0.184654	51.0555	8.97888e-13	1.00273e-10
Pfdn6	1.57362	0.0827674	0.131662	2.5884	0.107649	0.207298
Tspan14	1.57286	-0.00610086	0.144479	1.14528	0.28454	0.378439
Eif1b	1.57155	-0.168756	0.14446	2.97076	0.0847818	0.179263
Ror1	1.57103	-0.164362	0.240793	0.612484	0.433854	0.495396
Lsm4	1.56911	0.19079	0.14012	3.7209	0.0537354	0.132155
Iah1	1.56882	0.27392	0.156542	3.61592	0.057229	0.138007
Cisd1	1.56856	0.310599	0.162652	5.08096	0.02419	0.0752461
Tpd52l2	1.56806	0.0255765	0.134033	1.88201	0.170106	0.274088
Tmcc1	1.56803	-0.39676	0.160267	6.30654	0.0120293	0.0455929
Nherf1	1.56784	1.45407	0.195322	61.1651	5.24835e-15	9.45777e-13
Hectd1	1.56721	0.0344257	0.134326	0.957998	0.327692	0.414198
Hp1bp3	1.56717	-0.0230212	0.132718	1.09628	0.295085	0.387822
Net1	1.56637	0.601443	0.176525	12.1378	0.000494093	0.00379987
Cyth1	1.56416	0.247825	0.159687	2.72896	0.0985437	0.197026
Ndufa10	1.56408	0.172868	0.139016	4.07348	0.0435614	0.114015
Carmn	1.56273	-0.335671	0.180662	3.51293	0.0608916	0.144122
Psmb7	1.56208	0.268872	0.149039	5.79402	0.0160808	0.0557519
Retreg1	1.56175	0.155383	0.18124	1.46623	0.225941	0.326442
Aebp2	1.56052	-0.131929	0.161148	1.40316	0.236195	0.335866
Lamb1	1.56039	0.655104	0.16767	15.603	7.81303e-05	0.000851956
Vti1b	1.55999	0.0558713	0.133462	3.04096	0.0811881	0.174219
Smc1a	1.5593	-0.25281	0.141767	4.06626	0.0437481	0.114293
Ssbp1	1.55926	0.0386271	0.12961	3.48653	0.0618703	0.145613
Clec2d	1.55922	-0.134288	0.18342	0.709927	0.399468	0.469103
Fdx1	1.55916	0.690243	0.14715	26.3564	2.83884e-07	8.12605e-06
Tprgl	1.5589	-0.00571646	0.143807	2.55968	0.109621	0.209392
Diras2	1.55887	-0.297325	0.194767	2.62132	0.105437	0.205236
Atg3	1.55813	0.357293	0.144626	8.48728	0.00357639	0.0179476
Fbl	1.55593	-0.0624421	0.14828	1.59221	0.20701	0.309812
Ctnnd1	1.55376	0.200408	0.160938	2.10722	0.146605	0.249994
Tmem134	1.55357	0.503304	0.152883	12.9334	0.000322771	0.00269679
Use1	1.55331	-0.149623	0.132458	2.41818	0.119934	0.220999
Eif3g	1.5529	0.00604286	0.142159	2.5385	0.1111	0.210896
Lman1	1.54898	0.617051	0.16136	16.5413	4.76023e-05	0.000554242
Azin1	1.54708	0.256764	0.158551	3.576	0.0586202	0.140358
Anxa4	1.54619	-0.441132	0.152067	9.09432	0.00256404	0.0140402
Kazald1	1.54568	0.775772	0.204714	14.7725	0.00012129	0.00120666
Pdcd6	1.54262	-0.0204571	0.136806	2.52625	0.111966	0.211729
Aco2	1.54184	0.549124	0.150997	16.5234	4.80535e-05	0.000558675
Tsg101	1.54003	0.697419	0.154099	23.7042	1.12336e-06	2.53765e-05
Grina	1.53972	-0.210785	0.148847	2.4596	0.116809	0.217308
Smc4	1.53969	0.519523	0.183196	9.0449	0.00263428	0.0143259
Stx11	1.53962	0.452924	0.159833	9.80074	0.00174441	0.0104943
Pnisr	1.53904	-0.378228	0.133303	8.01988	0.00462667	0.0218103
Prr13	1.53873	-0.0298972	0.139789	0.695982	0.404137	0.472765
Cd200	1.53714	0.290403	0.182196	3.36452	0.066615	0.152966
Pnn	1.53686	0.0365697	0.140988	0.874598	0.349686	0.431206
Thrap3	1.53617	-0.0401136	0.143148	0.848756	0.356905	0.435905
Ankrd17	1.53529	-0.497708	0.15505	10.6664	0.00109099	0.00719073
Bcl10	1.53514	-0.132855	0.150886	1.82892	0.176256	0.280516
Pim1	1.53488	0.496734	0.20194	6.19751	0.012793	0.047511
Clpp	1.53375	0.199953	0.142034	3.72503	0.0536027	0.131951
Map3k7cl	1.53357	1.0878	0.249573	18.4864	1.71124e-05	0.000241862
Snw1	1.53326	0.116565	0.13878	2.52639	0.111956	0.211729
Klf2	1.53275	0.537347	0.316183	2.80222	0.0941338	0.19217
Snrpc	1.53233	0.325862	0.138496	8.31384	0.00393441	0.0193507
Srsf6	1.53074	0.236004	0.135	6.04807	0.0139215	0.0504726
Gli3	1.53062	-0.763906	0.16062	23.718	1.11535e-06	2.53398e-05
Cd2ap	1.53052	0.172775	0.148056	2.72032	0.0990782	0.197658
Ak2	1.52891	0.509797	0.152217	14.1004	0.000173306	0.00162045
Hivep3	1.5276	-1.16611	0.150502	62.7811	2.31002e-15	4.69645e-13
Dnajc8	1.52613	0.163278	0.145383	2.95074	0.0858384	0.180824
Cnn2	1.52576	-0.653938	0.172883	15.2428	9.45349e-05	0.000992804
Tsc22d3	1.5234	-0.133862	0.157585	1.31835	0.250888	0.349305
Hipk3	1.52291	-0.228455	0.148963	2.81378	0.0934578	0.191282
Pttg1	1.52262	0.357256	0.167992	5.40679	0.0200586	0.065857
Cd164	1.52207	0.500941	0.163392	11.8284	0.000583353	0.00438427
Phf20l1	1.52079	-0.0640386	0.139941	0.870404	0.350843	0.43205
Ralgapa1	1.51968	-0.506578	0.140832	13.4168	0.000249381	0.00219199
Slirp	1.51913	0.0845149	0.139331	2.69402	0.100725	0.199705
Cul1	1.51898	-0.128466	0.12843	1.83511	0.175525	0.279652
Kdm1a	1.51642	-0.0638212	0.136231	0.837986	0.359973	0.438303
Ube2e3	1.51562	0.107719	0.145905	1.21305	0.270729	0.366017
Mprip	1.51553	-0.272936	0.134549	4.26644	0.0388722	0.105436
Btbd9	1.51498	0.265508	0.178053	2.41709	0.120018	0.22105
Zfp467	1.51485	0.66623	0.158716	19.8402	8.41928e-06	0.000135135
Imp3	1.51415	0.304607	0.150327	6.14451	0.0131821	0.0485241
C1qbp	1.51221	0.096735	0.143403	2.70216	0.100212	0.198994
Mrpl43	1.50996	0.47528	0.146147	13.9486	0.00018788	0.00173221
Atp6v1a	1.50975	0.164847	0.148502	3.55261	0.0594517	0.141728
Sh3rf3	1.50889	-1.16822	0.183766	43.2118	4.91243e-11	3.64025e-09
Nampt	1.50834	-0.11195	0.151815	1.87491	0.170914	0.274828
Ube2v1	1.50824	0.366285	0.144102	9.47413	0.0020839	0.0120836
Fgf13	1.50783	-0.829799	0.221706	15.0918	0.000102406	0.00104992
Tomm5	1.50771	-0.062415	0.139032	2.74734	0.0974163	0.196148
Rtf1	1.50757	-0.347786	0.125975	9.16431	0.0024678	0.0137221
Cmtm7	1.50725	0.385563	0.162718	6.32672	0.0118932	0.0452067
Cd82	1.50621	-0.510714	0.156163	10.9938	0.00091416	0.00629199
Yipf4	1.50475	0.260511	0.14208	6.00837	0.0142382	0.0511996
Filip1l	1.50453	-0.49271	0.196727	6.40879	0.0113557	0.043666
Mif4gd	1.50433	0.0749588	0.170986	0.587317	0.443459	0.502671
Polr2g	1.50391	0.744985	0.157558	25.9437	3.51522e-07	9.88374e-06
Rcn1	1.5038	0.163582	0.166654	2.85394	0.0911502	0.188309
Smarca2	1.50344	-0.230007	0.143297	3.4636	0.0627336	0.147077
Rbbp6	1.50268	-0.365911	0.137293	7.48982	0.00620488	0.0276086
Ewsr1	1.50244	-0.0950794	0.132387	1.41993	0.233415	0.333347
Vezf1	1.50204	0.147021	0.146575	3.3568	0.0669279	0.153418
Nsfl1c	1.50178	0.444328	0.145614	11.9246	0.000553963	0.0041872
Copg2	1.5007	0.308215	0.142883	5.83729	0.0156899	0.0547318
Akirin1	1.50038	0.548331	0.154402	15.2352	9.49169e-05	0.000995497
Tnfrsf1a	1.50007	0.271986	0.155403	4.22721	0.0397807	0.107068
Kras	1.4995	0.308636	0.160579	5.29323	0.0214085	0.0690122
Smc6	1.49896	-0.15723	0.147855	1.72954	0.18847	0.293361
Nono	1.49652	0.194164	0.141815	3.81002	0.0509467	0.12719
Dctn6	1.49637	0.662129	0.152863	22.8924	1.71326e-06	3.70148e-05
Enpp5	1.4958	0.0717958	0.158874	1.59923	0.206012	0.308926
Ppig	1.49357	-0.0915977	0.141634	1.70538	0.191586	0.295946
Gsta4	1.49351	1.30407	0.276478	21.433	3.66419e-06	6.88469e-05
Scnn1a	1.49308	0.197567	0.17251	1.75361	0.185423	0.290615
Pawr	1.49303	-0.269485	0.175735	2.50706	0.113337	0.213609
Cbx4	1.49269	0.283721	0.163396	3.07847	0.079335	0.171428
Msrb3	1.49266	-0.991815	0.208661	23.7764	1.08199e-06	2.47951e-05
Tubb2a	1.49236	0.409305	0.200554	4.81081	0.0282818	0.0844936
Gpbp1	1.49152	0.0668807	0.142485	1.5963	0.206428	0.309248
Chchd6	1.49041	-0.663655	0.145187	21.9975	2.73003e-06	5.4525e-05
Svil	1.48981	0.357205	0.168354	4.84865	0.0276678	0.0831291
Dpm3	1.48968	-0.0049903	0.136391	1.51004	0.219133	0.320194
Acaa1a	1.48921	0.0616223	0.140467	2.12159	0.145236	0.248344
Cuedc1	1.48873	0.0788445	0.141139	0.762258	0.382623	0.455939
Ascc3	1.48736	-0.320045	0.143087	5.35605	0.0206505	0.0672705
Ndufb4	1.48652	0.159542	0.148691	3.35853	0.0668577	0.153301
Med13	1.48552	-0.285356	0.179156	2.61458	0.105886	0.205415
Rad23a	1.4847	0.123585	0.143451	2.79292	0.0946815	0.192674
Dek	1.48402	-0.366928	0.146813	7.20981	0.00725063	0.0310718
Caprin1	1.48173	0.0230553	0.145132	0.866627	0.351891	0.432647
Abhd14b	1.48153	0.73559	0.17309	20.0516	7.53789e-06	0.000123233
Ralgps2	1.48146	0.0830496	0.148633	1.68307	0.194517	0.298323
Pdia4	1.48122	0.639094	0.188388	12.4095	0.000427158	0.00337008
Brd1	1.48108	0.474479	0.149943	11.5206	0.000688276	0.00504375
Nfkbiz	1.48044	0.608587	0.272579	4.88566	0.0270807	0.0818304
Pum1	1.48026	-0.1841	0.137	3.1606	0.0754356	0.166063
Zfp462	1.47991	-0.236989	0.165466	2.20848	0.137253	0.239921
Cers6	1.4765	-0.233361	0.18276	2.18171	0.139659	0.242364
Naxd	1.47632	0.161469	0.141191	2.80323	0.0940747	0.192098
Eif3l	1.47596	0.385964	0.150361	8.34002	0.00387812	0.0191348
Prxl2c	1.47458	0.122129	0.143448	2.73054	0.0984463	0.197026
Mettl9	1.47349	0.216431	0.14886	4.13539	0.0419955	0.111031
Rwdd1	1.47229	-0.209102	0.141787	3.77789	0.0519342	0.128932
Tm9sf3	1.47204	-0.088049	0.144018	2.24712	0.133864	0.236446
Lgr4	1.47196	-0.210628	0.165988	1.94744	0.162863	0.267772
Anapc16	1.47164	0.25255	0.146648	4.90928	0.0267128	0.0809655
Trio	1.47113	-0.281469	0.161301	3.07925	0.0792971	0.171414
Ssr2	1.47104	0.37681	0.158909	7.45594	0.00632274	0.0280078
Fbxo11	1.47013	-0.433468	0.147923	9.0524	0.0026235	0.0142869
Glrx5	1.46798	0.231064	0.144382	4.33345	0.0373704	0.102565
Tsen34	1.4675	-0.191178	0.135613	3.81389	0.0508293	0.127017
Kidins220	1.46715	-0.308754	0.163987	4.40617	0.0358091	0.0994851
Irs2	1.46695	0.204347	0.158811	2.57821	0.108344	0.20795
Ncoa1	1.46674	-0.224728	0.156368	2.65381	0.103302	0.202443
Nr6a1	1.46639	-0.271091	0.182727	2.56586	0.109193	0.208875
Fndc3a	1.46542	-0.457425	0.158112	8.86628	0.00290487	0.0153551
Col4a1	1.46481	-0.487361	0.16359	9.37363	0.0022013	0.0125861
Nptn	1.46448	0.136578	0.149432	2.44654	0.117784	0.218356
Pkn2	1.46341	-0.20155	0.137945	3.08358	0.0790862	0.171191
Dhx29	1.4628	-0.0693961	0.186934	0.291516	0.589251	0.620477
Btbd7	1.46227	0.00538117	0.156402	0.54448	0.460582	0.515959
Chmp2b	1.45989	0.0449558	0.140107	3.44214	0.0635532	0.148146
Zmat2	1.45707	0.100051	0.141457	1.96728	0.160737	0.265739
Ythdc1	1.45702	0.344739	0.166959	4.52545	0.0333942	0.0944304
Lmna	1.45625	-0.0375003	0.1545	0.603806	0.43713	0.497599
Dock1	1.45599	-0.194025	0.178558	1.6331	0.201275	0.304446
Spag9	1.45578	-0.266874	0.156849	3.49523	0.0615458	0.14528
Norad	1.45439	-0.306016	0.141563	5.93795	0.0148182	0.0527113
Ccdc50	1.45367	-0.0106211	0.135314	1.08797	0.296922	0.389268
Naaladl2	1.45365	-1.46077	0.233717	42.8756	5.83329e-11	4.24331e-09
Acp1	1.4529	0.0268689	0.138683	2.99603	0.0834686	0.177147
Alas1	1.45225	1.44499	0.215804	47.8011	4.71721e-12	4.45271e-10
Fam162a	1.45101	0.178253	0.146457	3.30582	0.069035	0.156645
Ugdh	1.44906	0.73135	0.181963	18.0314	2.17289e-05	0.000297049
Smg6	1.44869	-0.0319361	0.167462	0.0869597	0.768078	0.778784
Dnajc1	1.44686	-0.502126	0.148684	12.2461	0.000466223	0.00362632
Fermt2	1.44684	-0.11514	0.145743	1.78421	0.181633	0.286544
Inpp1	1.44564	0.0134064	0.157993	1.17216	0.278957	0.373119
Boc	1.44519	0.252831	0.16427	2.66889	0.102327	0.201221
Mfge8	1.44454	0.0614553	0.194475	0.798414	0.371568	0.447065
Pin1	1.44365	0.493778	0.147934	13.9151	0.000191254	0.00175719
Cbx6	1.44245	0.559238	0.160433	13.1663	0.000285029	0.00245919
Skic8	1.44243	0.192297	0.145334	4.15902	0.0414134	0.110006
Faf1	1.44225	-0.313344	0.143942	5.47204	0.0193231	0.0639186
Mrpl54	1.44003	0.154541	0.145596	2.94231	0.0862873	0.181392
Fam32a	1.43772	0.346576	0.150007	7.58529	0.00588466	0.0264061
Sbf2	1.43634	-0.512034	0.163423	10.1716	0.00142623	0.00889739
Immt	1.43595	-0.00155214	0.143107	2.5276	0.11187	0.211699
Txndc9	1.43554	0.349767	0.150059	7.41595	0.00646482	0.0285477
Pfn2	1.43362	-0.107199	0.154338	2.24387	0.134145	0.236594
Gatad1	1.43327	0.0582898	0.150347	2.07046	0.150177	0.253729
Ppp1r14b	1.43242	0.315009	0.169778	4.24408	0.0393875	0.106334
Ddit4	1.43219	0.46893	0.251595	3.40316	0.0650718	0.150556
Pdcl3	1.43187	0.602968	0.151451	19.1994	1.1775e-05	0.000178175
Qki	1.4315	-0.417211	0.161659	7.08905	0.00775563	0.0326815
Fermt1	1.43136	0.22283	0.148401	3.44425	0.0634723	0.148102
Dctn4	1.43002	0.0639048	0.136603	2.23692	0.134749	0.237375
Iqgap1	1.42968	-0.402826	0.156757	7.27155	0.00700554	0.0302708
Gm14207	1.42966	-0.00182185	0.193172	0.421739	0.516071	0.560077
Hibadh	1.42954	0.295269	0.142903	6.84424	0.00889273	0.0363456
Pcm1	1.42933	-0.0943691	0.14769	0.903705	0.34179	0.425738
Mrps12	1.42861	0.339229	0.146645	8.19405	0.0042028	0.0202468
Phlda1	1.42858	1.09228	0.323106	10.7435	0.00104645	0.00697255
Saraf	1.42443	0.225906	0.147454	4.0149	0.0450998	0.116709
Bola3	1.4244	0.169808	0.148726	2.76297	0.0964691	0.195079
Larp1	1.42326	-0.200726	0.136016	2.56779	0.10906	0.208722
Pgm1	1.42305	1.23756	0.22178	31.8506	1.66497e-08	6.53542e-07
Gadd45gip1	1.42296	0.178848	0.149596	3.14622	0.0761031	0.166829
Odc1	1.42289	-0.609146	0.173018	13.4829	0.000240742	0.00213517
Trip12	1.4225	-0.236607	0.149898	3.05473	0.0805022	0.173263
Pa2g4	1.42239	0.419836	0.153615	10.3909	0.0012664	0.00810435
Ggh	1.42147	-0.32462	0.187928	4.16146	0.0413538	0.109958
Zfp106	1.42022	-0.0360533	0.15231	0.920245	0.337411	0.421711
Bltp1	1.41982	-0.404928	0.178719	5.56771	0.0182947	0.0613356
Emd	1.41972	0.231752	0.149777	4.48077	0.0342782	0.0964144
Etf1	1.41789	0.109066	0.160135	1.26573	0.26057	0.357017
Spats2l	1.41784	-0.736385	0.156644	23.352	1.34907e-06	2.99629e-05
Nap1l4	1.41681	0.698861	0.159385	22.165	2.50192e-06	5.07358e-05
Zwint	1.41642	0.607279	0.176408	13.9178	0.00019098	0.00175677
Hivep2	1.41504	-0.279093	0.192781	2.26754	0.132109	0.234077
Eif3j1	1.41502	0.233546	0.149608	4.16399	0.041292	0.109867
Ddx50	1.4148	-0.203133	0.135465	3.44384	0.0634881	0.148102
Reep3	1.41452	0.131433	0.162629	0.905605	0.341283	0.42541
Gclc	1.41403	0.659321	0.257993	6.30971	0.0120078	0.0455551
Birc3	1.41396	0.28555	0.235557	1.46529	0.22609	0.326588
Timm23	1.41388	0.0925252	0.145425	2.99294	0.083628	0.177438
Jarid2	1.41358	-0.457066	0.160731	8.35587	0.00384442	0.0189922
Me2	1.41333	0.173964	0.166802	2.16266	0.1414	0.244262
Cflar	1.41297	0.0236212	0.138968	0.876792	0.349082	0.43073
Pbx3	1.41155	-0.281245	0.200811	2.18759	0.139127	0.241915
Fat1	1.41109	0.0713565	0.166768	1.00479	0.316153	0.404711
Ppp2r2a	1.41037	0.257335	0.149976	4.47933	0.0343071	0.0964273
Nudt14	1.40958	0.463618	0.154075	10.8185	0.00100489	0.00674663
Slc25a17	1.40888	0.701303	0.15356	24.4321	7.69759e-07	1.87221e-05
Arhgap26	1.40855	-0.207985	0.194932	1.49406	0.221587	0.322497
Bclaf1	1.40831	-0.269414	0.144223	3.85309	0.0496545	0.124908
Scaper	1.40715	-0.215089	0.158078	2.31172	0.128402	0.229937
Rsf1	1.4066	0.0308877	0.14358	1.12166	0.289562	0.382912
Isoc1	1.40655	0.144238	0.170294	2.37036	0.123659	0.225142
Pts	1.40651	0.204178	0.149456	4.03125	0.044665	0.115848
Cst6	1.4062	1.28198	0.246654	27.0102	2.0238e-07	6.19565e-06
Exoc6b	1.40596	-0.57552	0.167392	12.6609	0.000373388	0.00302719
Acbd6	1.40577	-0.0609458	0.136143	2.00949	0.156318	0.260938
Vps36	1.40508	0.992988	0.170785	38.0987	6.72563e-10	3.62772e-08
Mmp2	1.40483	0.846448	0.260393	10.547	0.00116374	0.00756957
Cul3	1.40482	-0.0438977	0.152856	1.60315	0.205458	0.308399
Gas1	1.40464	0.446548	0.240828	3.53499	0.0600866	0.142643
Polr2m	1.40437	0.141302	0.140661	4.28238	0.0385093	0.104748
Psmd2	1.40435	0.00287367	0.147859	1.75216	0.185605	0.29066
Rab11a	1.40429	0.32503	0.148396	7.79999	0.00522466	0.0239736
Polr2i	1.40405	0.371581	0.150622	7.80999	0.00519582	0.0238689
Ccdc124	1.4036	0.129772	0.146259	2.04823	0.152383	0.256204
Tle4	1.40277	-0.273162	0.174651	2.47738	0.115494	0.21598
Tcim	1.40237	2.21892	0.373277	31.6969	1.80211e-08	6.97021e-07
Fam104a	1.40175	0.338445	0.156044	6.44973	0.0110969	0.0429139
Kif13b	1.39985	-0.148935	0.160075	1.13785	0.286106	0.379878
Ppp4r2	1.39915	0.0746317	0.143148	1.90898	0.167077	0.271184
Eif1ax	1.39759	0.159249	0.161446	1.70463	0.191683	0.295979
Tnrc18	1.39731	-0.528118	0.151933	12.245	0.000466496	0.00362632
Cript	1.39691	0.31609	0.146225	6.94127	0.00842293	0.0348749
Smarce1	1.39571	-0.04635	0.139443	1.95711	0.161822	0.266818
Art3	1.39569	2.01478	0.251484	69.7272	6.81005e-17	1.99988e-14
Rb1	1.39527	0.0293232	0.156964	0.943672	0.331335	0.416546
Ggt5	1.39455	-0.698926	0.167119	17.7589	2.5074e-05	0.000334137
Supt4a	1.3938	0.054859	0.143238	1.06563	0.301934	0.39298
Slc22a7	1.39319	-0.900278	0.285305	10.7659	0.00103387	0.00691774
Dpyd	1.39286	-0.682446	0.209383	11.1781	0.000827681	0.00584406
Sdcbp	1.39285	-0.00381579	0.153137	1.46445	0.226223	0.326606
Lncppara	1.39255	-0.00102594	0.184466	0.00652895	0.9356	0.936426
Serpinb1a	1.39199	-0.849934	0.369065	5.71288	0.0168409	0.0577058
Zmpste24	1.39162	0.435539	0.162025	9.36755	0.0022086	0.0126076
Sdf4	1.3912	-0.00311836	0.140373	1.70834	0.191201	0.295695
Nmi	1.39102	-0.288527	0.14494	5.31349	0.021161	0.0684558
Kmt2c	1.39066	-0.378496	0.153776	6.38718	0.0114947	0.044051
Ints6	1.38953	0.0434985	0.240554	0.0353139	0.850939	0.856774
Lsm7	1.38929	-0.0609837	0.136895	1.63527	0.200975	0.304392
Plcb4	1.38928	-0.595825	0.177161	12.1261	0.000497214	0.00382016
Cnot4	1.38911	-0.628104	0.141235	20.4067	6.26115e-06	0.000106036
Neat1	1.3876	0.102389	0.216845	0.26536	0.606461	0.634119
Fkbp3	1.38756	0.24399	0.16096	3.96739	0.0463895	0.118883
Thsd4	1.38706	-0.49066	0.270859	3.43477	0.0638375	0.148557
Denr	1.3864	0.256918	0.148756	5.31247	0.0211733	0.0684678
Niban1	1.38546	-0.017812	0.180171	0.7778	0.377815	0.451976
Nsmce4a	1.38473	0.432791	0.155245	9.70966	0.00183302	0.0109196
Spr	1.38421	0.385613	0.160633	7.23934	0.00713232	0.0307289
Usp25	1.38291	-0.360432	0.152217	6.759	0.00932762	0.0376572
Dph3	1.38169	0.140563	0.148509	2.6021	0.106722	0.206146
Dhrs3	1.38096	0.0571767	0.176686	0.522831	0.469637	0.523145
Rnf213	1.38094	-0.931889	0.174736	29.1918	6.55564e-08	2.23089e-06
Irgm1	1.38071	0.465413	0.229678	4.3979	0.0359832	0.0997725
Srpr	1.3801	0.704333	0.157367	24.5032	7.41871e-07	1.83249e-05
Pkhd1l1	1.37894	-0.590056	0.177579	11.5023	0.000695101	0.00508437
Tmem14c	1.3789	0.00761524	0.14443	2.0016	0.157133	0.261801
Zcchc7	1.37786	-0.235922	0.15666	2.52432	0.112103	0.211937
Hacd2	1.37773	1.05469	0.180933	38.4247	5.69086e-10	3.17767e-08
Rapgef6	1.37755	0.0478165	0.176501	0.22816	0.632892	0.657281
Kdm5b	1.37753	0.537695	0.179729	9.32621	0.00225899	0.0128398
Cirbp	1.37605	-0.119041	0.152218	1.31049	0.252306	0.350295
Ubn2	1.37547	-0.337109	0.145394	5.74259	0.0165584	0.0569397
Sgpp1	1.37364	-0.343588	0.17099	4.46132	0.0346708	0.0973113
Cbr1	1.37237	0.517798	0.157952	13.2292	0.000275621	0.00238841
Mrpl24	1.37182	0.223447	0.148229	4.32916	0.0374647	0.102717
Nfic	1.36909	0.118977	0.146232	1.62156	0.202874	0.305758
Pgm5	1.36869	-0.134792	0.190612	0.607015	0.435914	0.496889
Snrpa	1.36864	0.317419	0.149705	6.23132	0.012551	0.0469166
Trip11	1.36734	0.0561904	0.15034	0.887584	0.346133	0.42896
Snhg12	1.36726	-0.351271	0.171909	4.45498	0.0347997	0.0974973
Dnajc19	1.36702	0.211684	0.141672	4.30268	0.0380525	0.103862
Osbpl10	1.36533	-1.06386	0.198426	30.5025	3.33434e-08	1.21834e-06
Trpm7	1.36464	-0.303718	0.157189	4.11815	0.0424255	0.11187
Cox8b	1.3645	1.28622	0.454298	7.23871	0.00713481	0.0307289
Man1a2	1.36369	-0.428353	0.139754	9.63672	0.00190726	0.0112856
Smyd3	1.36336	-0.440678	0.192275	5.61221	0.0178357	0.0602812
Fundc2	1.36313	-0.182615	0.138843	4.19604	0.0405186	0.108355
Mia2	1.36273	0.135369	0.151326	1.89397	0.168754	0.272738
Cdc26	1.36137	0.210594	0.142891	4.48732	0.0341472	0.0961285
Arhgap8	1.36105	-0.104858	0.156258	1.3562	0.244196	0.342939
Spint1	1.35937	-0.109388	0.157745	1.24632	0.264256	0.360015
Ackr4	1.35767	-0.196524	0.328517	0.399656	0.527267	0.569345
Mmp9	1.35526	-0.548077	0.290459	3.71664	0.0538727	0.13237
Slc25a11	1.35413	0.637563	0.171356	15.653	7.60912e-05	0.000832175
Rbm42	1.35101	0.077408	0.147167	1.59259	0.206956	0.30979
Adrm1	1.35084	0.696323	0.172562	18.4808	1.71626e-05	0.000242139
Gm11808	1.35072	-0.0434463	0.168124	1.28202	0.257523	0.35462
Mapre1	1.35053	0.0557828	0.148092	1.69153	0.193399	0.297282
Mcl1	1.3503	0.392579	0.172437	6.42262	0.0112676	0.0433482
Grk5	1.34927	-0.683428	0.220367	10.0438	0.00152863	0.0093971
Grp	1.34747	-1.41129	0.360523	17.119	3.51097e-05	0.000442584
Hdac2	1.34733	0.41899	0.147611	11.3085	0.000771525	0.00554617
Mtx2	1.34732	0.0986624	0.147939	3.758	0.0525556	0.129939
Snap47	1.34715	0.425519	0.163358	9.21647	0.00239848	0.013421
Syngr2	1.3461	0.0566873	0.179992	0.398837	0.527691	0.569415
Xbp1	1.34586	0.144232	0.178099	1.9152	0.166387	0.270622
R3hdm2	1.34556	0.174927	0.151468	1.55088	0.213005	0.314905
Txnl4a	1.34512	0.159692	0.147273	3.25545	0.0711865	0.159131
Scamp2	1.34508	0.284569	0.157232	4.39503	0.0360438	0.0998485
Ppp1r12b	1.34352	-0.169517	0.184244	1.08949	0.296584	0.388954
Akap13	1.34285	-0.107197	0.185247	0.852025	0.35598	0.435349
Eif2s1	1.34275	0.219893	0.142856	6.66364	0.00983996	0.0391868
Ramac	1.34254	0.406808	0.153567	9.27535	0.00232258	0.0131237
Bod1l	1.34242	0.198399	0.149514	3.03358	0.0815578	0.174776
Klf3	1.34094	0.461119	0.170636	8.64456	0.00328039	0.0167591
Ntan1	1.34036	-0.381834	0.141363	8.72161	0.0031446	0.0162031
Hdac1	1.34025	0.236807	0.145487	4.25304	0.0391801	0.105846
Mctp1	1.33983	1.72266	0.389639	17.4394	2.96613e-05	0.000386181
Dbnl	1.33952	0.0635876	0.144484	2.77606	0.0956834	0.194034
Nr2f6	1.33919	0.283941	0.148603	5.35702	0.0206391	0.0672705
Hmgb2	1.33872	1.00399	0.208283	24.451	7.62224e-07	1.86723e-05
Actr2	1.3375	0.0424792	0.143778	1.58954	0.207393	0.31017
Hsd17b8	1.33732	0.310722	0.162398	5.15294	0.023207	0.0732225
Arfgef1	1.33711	0.22065	0.157329	2.30425	0.12902	0.230718
Actn4	1.33614	0.208309	0.150647	3.12501	0.0770993	0.168176
Sec13	1.33575	0.688302	0.15756	22.6581	1.93543e-06	4.11422e-05
Notch2	1.33567	-0.456663	0.165949	7.9407	0.00483351	0.0226775
Nin	1.33529	0.700782	0.197664	13.3605	0.000256978	0.00224403
Sar1b	1.33456	0.401813	0.152168	9.15819	0.00247608	0.0137221
Scn1a	1.33445	-0.502634	0.294582	3.17077	0.0749669	0.165252
Snx27	1.3341	0.373486	0.163474	6.27868	0.0122199	0.0460732
Cpt1a	1.33292	0.262937	0.159268	4.12813	0.0421758	0.111348
Rab5c	1.33267	0.20657	0.143242	3.96767	0.0463819	0.118883
Rnf10	1.33251	0.0285012	0.148217	2.106	0.146722	0.249994
Psmc1	1.33191	0.4075	0.151126	9.62545	0.00191899	0.0113296
Sod1	1.33154	0.200123	0.154741	3.24045	0.0718409	0.160232
Id4	1.33124	0.475824	0.20454	5.44707	0.0196012	0.0646496
Dazap2	1.33121	0.220877	0.147382	4.04302	0.0443544	0.11522
Polr2e	1.3306	0.129769	0.144633	2.67643	0.101844	0.200875
Gspt1	1.33042	0.153944	0.152475	3.60762	0.0575155	0.138446
Ier3ip1	1.32874	0.625924	0.153706	20.243	6.82036e-06	0.000113372
Cited2	1.32873	0.761206	0.259715	8.49017	0.0035707	0.0179304
Raly	1.32829	-0.106505	0.150912	1.55353	0.212616	0.314809
Ptpn1	1.32804	-0.202606	0.154469	1.85454	0.173256	0.277301
Mrpl58	1.32723	0.562178	0.159838	14.9005	0.000113335	0.00114185
Sec63	1.32604	-0.205526	0.154038	2.66337	0.102683	0.201542
Gab1	1.32538	-0.289108	0.179774	2.64126	0.104121	0.203494
Gna13	1.3253	0.247665	0.157527	4.55839	0.0327578	0.0932387
Rab5a	1.32527	0.249303	0.153062	4.79268	0.0285809	0.0849955
Efnb2	1.32396	0.39536	0.198832	3.98836	0.0458157	0.117908
Trp53	1.32387	0.00940673	0.148271	1.43339	0.231212	0.331635
Fam172a	1.32355	-0.798364	0.157755	26.8011	2.25513e-07	6.69696e-06
Gchfr	1.32338	4.03718	0.459131	94.9139	1.98852e-22	1.97088e-19
Wdr33	1.3227	-0.176635	0.136809	2.58141	0.108125	0.207786
Nudt3	1.32269	0.615497	0.154312	18.5594	1.64691e-05	0.000235583
Taok1	1.32159	-0.298818	0.150878	4.61883	0.0316228	0.0909126
Rtp4	1.32137	-0.0440138	0.224835	0.106392	0.74429	0.756987
Fubp1	1.32118	-0.170827	0.152186	1.46223	0.226576	0.3267
Pitpna	1.32104	-0.166339	0.140285	3.26703	0.0706853	0.158413
Rcn2	1.32044	0.198718	0.160241	2.6649	0.102584	0.201434
Thoc2	1.31948	-0.365717	0.14418	6.78983	0.00916787	0.0372017
2010004M13Rik	1.31915	1.51928	0.224694	50.0527	1.49675e-12	1.58236e-10
Ccdc90b	1.31888	0.0975714	0.152871	2.55764	0.109762	0.209516
Pnkd	1.31749	0.45303	0.152849	12.0093	0.000529366	0.0040243
Cdk12	1.31735	-0.166151	0.159508	1.30214	0.253823	0.351355
Ghitm	1.31684	0.399404	0.152848	9.32182	0.00226441	0.0128614
Mrpl27	1.31605	0.0267091	0.147952	1.75065	0.185795	0.290709
Slc24a4	1.31571	0.186272	0.310831	0.376244	0.53962	0.579292
Myo1e	1.31518	-0.823898	0.229883	13.6176	0.000224072	0.00201208
Diaph2	1.31474	-0.812514	0.184559	20.2952	6.63671e-06	0.000111725
Vps35	1.31459	0.236581	0.148389	5.1537	0.0231968	0.0732197
Jag1	1.31454	1.15194	0.199205	36.119	1.85629e-09	8.9747e-08
Crip1	1.31393	-0.876308	0.261813	12.1533	0.000490015	0.00378318
Antkmt	1.31371	0.177244	0.144955	2.85877	0.0908771	0.187843
Taf15	1.31249	-0.284635	0.144076	4.48814	0.0341309	0.0961285
Copb1	1.31221	0.0929199	0.158252	2.18973	0.138934	0.241633
Nr3c1	1.31116	-0.418206	0.161214	8.04667	0.00455873	0.0215412
Lonrf1	1.31089	1.00188	0.198697	26.8495	2.19927e-07	6.58039e-06
Chd2	1.31012	0.00273111	0.175482	0.0730025	0.787014	0.796863
Ryr3	1.31007	0.316049	0.339266	0.858811	0.354072	0.433845
Gng12	1.30996	-0.251851	0.160609	3.82564	0.050474	0.126397
[truncated: 5,991 more rows]

## Sheet: TEC Progenitors
GeneName	baseMean	log2FoldChange	lfcSE	stat	pvalue	padj
Malat1	577.735	0.441054	0.0794202	30.857	2.77755e-08	3.09132e-07
Cd74	98.5279	-0.0900958	0.065727	1.87862	0.170491	0.28493
Itm2b	68.9814	0.736967	0.0616997	142.386	8.00859e-33	1.25142e-30
Ifitm3	62.6997	-0.293237	0.0606364	23.3057	1.38189e-06	1.14737e-05
Tmsb4x	59.9986	0.241584	0.0749288	10.4205	0.00124627	0.00505036
Eef1a1	58.3931	0.295054	0.0633612	21.7383	3.12487e-06	2.43416e-05
Rpl13	55.5957	-0.198075	0.0558959	12.5397	0.000398403	0.00183858
Rps8	51.4337	0.207456	0.0600348	11.9698	0.000540685	0.0024264
mt-Co3	49.3249	-0.138203	0.0501423	7.58565	0.00588349	0.0192092
Tpt1	46.5046	-0.293809	0.0600557	23.8754	1.02778e-06	8.7283e-06
mt-Co1	45.17	-0.332886	0.0555205	35.7821	2.20668e-09	2.9984e-08
mt-Cytb	44.899	0.194271	0.0490429	15.7094	7.38557e-05	0.000410993
Rps24	44.708	-0.0816912	0.0576916	2.00838	0.156432	0.267675
Actb	42.0415	0.512965	0.0830641	38.1915	6.41323e-10	9.38325e-09
mt-Atp6	42.0286	-0.146866	0.0543937	7.28172	0.006966	0.0220511
Dcn	41.7427	2.10771	0.111903	335.005	7.8121e-75	1.5259e-71
Rplp1	40.1857	-0.142254	0.0612231	5.4072	0.0200538	0.0535843
Rpl23	40.0582	-0.0446299	0.055903	0.644853	0.421959	0.518604
Rpl9	40.0194	-0.0629714	0.0608478	1.07483	0.299857	0.419412
Rps20	39.0021	0.053922	0.0560432	0.935451	0.33345	0.448485
Rpl39	38.8841	-0.0682145	0.0580318	1.39741	0.237158	0.35644
Rps27a	38.8022	0.11886	0.0589503	4.08091	0.0433702	0.099217
Rpl41	38.0102	-0.157748	0.0580555	7.40173	0.00651611	0.0208906
Rps3a1	37.8823	0.0864144	0.0664336	1.69992	0.192298	0.308951
Ifi27l2a	37.2742	-0.95193	0.0883537	113.272	1.88099e-26	1.72897e-24
Ptma	36.9248	0.147037	0.0562073	6.8751	0.00874047	0.0267906
Fau	36.8464	0.0723008	0.0544346	1.77381	0.182911	0.299342
Ubb	36.3652	0.122947	0.0651568	3.57701	0.0585846	0.125851
mt-Co2	36.0788	-0.0339044	0.0507999	0.445372	0.504541	0.575219
Rpl21	35.6889	0.00330315	0.0524052	0.0111035	0.91608	0.916666
H2-Aa	35.6001	-0.104869	0.0612073	2.94091	0.0863619	0.171073
Rpl37	35.0949	-0.116366	0.0536547	4.71839	0.0298416	0.0732263
Actg1	34.4927	0.834604	0.0892649	87.1261	1.01817e-20	5.52426e-19
Ctsl	33.1635	0.671773	0.0762648	77.623	1.24711e-18	5.5049e-17
Rpl19	33.094	0.0306818	0.058063	0.287	0.592149	0.634806
Rpl6	32.9836	0.138143	0.0598864	5.34267	0.0208096	0.0551323
Rpl18a	32.9761	-0.0237644	0.0540627	0.203608	0.651824	0.680115
Rpl35a	32.7785	-0.146841	0.0556126	6.98308	0.0082284	0.0254507
Rps2	32.5208	0.0377255	0.0629721	0.36829	0.543938	0.602379
Apoe	32.3999	-0.811298	0.0761873	111.412	4.80748e-26	4.26828e-24
Rps16	32.3535	-0.0404497	0.0560405	0.528956	0.467046	0.54782
Rpl27a	32.0868	0.229968	0.056253	16.7869	4.18205e-05	0.000247909
Rps21	32.0317	-0.309837	0.0563703	30.1718	3.95425e-08	4.28496e-07
H2-Ab1	32.0248	-0.294222	0.0583202	25.4283	4.59139e-07	4.14233e-06
H3f3b	31.4898	0.7006	0.0651645	115.602	5.81018e-27	5.60431e-25
Rpl11	31.0772	0.0346905	0.0548541	0.412948	0.520477	0.58671
Rps12	31.0217	-0.161245	0.0575137	7.87974	0.00499917	0.0168066
Rps4x	30.9937	-0.15129	0.0635285	5.67593	0.0171992	0.0470345
Rps10	30.8171	-0.0363238	0.0591069	0.388531	0.533072	0.594306
Rps7	30.5755	-0.144496	0.0601184	5.78544	0.0161595	0.0448505
Fth1	29.8383	-0.134531	0.068336	3.88733	0.0486516	0.108791
Rps5	29.7524	0.0438913	0.0640682	0.476122	0.490184	0.564037
Ppia	29.7312	0.30064	0.0589772	26.1036	3.23581e-07	3.01687e-06
Rpl32	28.9822	-0.0933907	0.0567328	2.72828	0.0985856	0.189623
Rps26	28.9053	0.230618	0.0576634	16.0787	6.0764e-05	0.00034477
Rpsa	28.5574	0.0329696	0.0626554	0.285703	0.592987	0.635442
Ly6e	28.5316	-0.0799125	0.0569648	1.97858	0.15954	0.271389
Rpl30	28.403	-0.00726303	0.0565936	0.0306078	0.861118	0.863993
Rpl28	28.1167	-0.0744738	0.0536007	1.9502	0.162565	0.27468
Rps15a	28.0345	-0.028412	0.0618394	0.223926	0.636065	0.667953
Rpl37a	27.1154	-0.251443	0.0549804	20.9527	4.70758e-06	3.51965e-05
Rplp0	27.1118	0.170799	0.0650212	6.9321	0.00846624	0.0260831
Rpl10	27.0512	-0.0363173	0.0604458	0.381167	0.53698	0.597128
Hsp90ab1	26.2341	0.240597	0.0587962	16.8588	4.02669e-05	0.000239974
Ccl21a	25.7633	0.762253	0.288297	6.96387
Rpl17	25.7406	-0.0234333	0.0594924	0.172163	0.678197	0.701575
Rpl34	25.6003	-0.0601671	0.0589244	1.06004	0.303207	0.422425
Rpl38	25.558	-0.226544	0.0519576	19.0568	1.26886e-05	8.47318e-05
Rps14	24.1574	-0.0275287	0.0588687	0.241927	0.622818	0.6574
Rpl36	23.6008	-0.189984	0.0517217	13.5445	0.000232975	0.00115278
Tmsb10	23.2219	-0.386274	0.0759286	25.8289	3.73069e-07	3.4171e-06
Rps29	22.4828	-0.351975	0.0552184	40.7134	1.76275e-10	2.78793e-09
Rps23	22.3053	-0.167511	0.0556885	9.08538	0.00257661	0.00941584
Rpl26	22.2111	-0.181433	0.0523784	12.0541	0.000516773	0.00233115
Rpl18	22.0835	0.17921	0.0586167	9.40457	0.00216446	0.00810297
Rps3	21.8637	0.0857603	0.0635715	1.84041	0.174903	0.289824
Rpl8	21.7123	-0.0042863	0.0610182	0.0211347	0.884413	0.886228
Rps9	21.6817	-0.1127	0.0627546	3.24775	0.0715215	0.147829
Rpl10a	21.6657	0.0758098	0.0626317	1.49295	0.221759	0.341983
Rpl24	21.5871	0.0971125	0.0555032	3.10542	0.0780323	0.158355
Rps11	21.3194	0.0891747	0.0548898	2.67708	0.101802	0.193853
H2-K1	21.217	-0.669259	0.0696822	91.2944	1.23809e-21	7.32819e-20
H2-Eb1	20.8258	-0.303496	0.0572314	28.1083	1.14715e-07	1.17159e-06
Rps19	20.6562	-0.283864	0.056446	25.3399	4.80669e-07	4.31695e-06
H2-D1	20.5275	-0.446462	0.0697095	40.8037	1.68312e-10	2.6728e-09
mt-Nd4	20.5203	0.0316881	0.0554634	0.327033	0.567411	0.617952
Rpl13a	20.5013	0.034129	0.0527817	0.472009	0.492064	0.565617
Ly6a	20.1636	-1.13518	0.138089	65.325	6.3511e-16	2.0762e-14
Rps27	20.0569	-0.252506	0.0591504	18.3047	1.88243e-05	0.00012085
B2m	19.7436	-1.00876	0.073625	183.842	7.02352e-42	2.0324e-39
Ftl1	19.3634	0.512934	0.0648481	62.8343	2.24844e-15	6.91617e-14
Myl6	19.2306	0.390894	0.0706946	30.6986	3.01381e-08	3.33999e-07
Rplp2	19.1165	-0.113178	0.0557951	4.16446	0.0412805	0.0954496
Rps13	19.0413	0.0525782	0.0621869	0.746743	0.387509	0.494546
Rps28	18.8586	-0.251317	0.0575967	19.1608	1.20158e-05	8.07217e-05
Rpl15	18.6527	0.149994	0.060974	6.11836	0.0133785	0.0383723
Tmem176b	18.6276	-0.124942	0.0735322	2.89643	0.0887762	0.174775
Rpl3	18.1643	0.135918	0.0644416	4.50322	0.0338311	0.08128
Rps18	18.1593	-0.0565999	0.060361	0.917676	0.338086	0.452926
S100a11	18.0758	-0.191947	0.0604264	10.1499	0.00144306	0.00573771
Krt18	17.1636	0.0583084	0.0823827	0.511178	0.474629	0.553248
Rpl7	17.0704	-0.0667837	0.0604303	1.25989	0.261672	0.381996
Naca	16.4533	0.223891	0.0596611	14.202	0.000164197	0.000841779
Rpl27	15.9812	-0.051609	0.0544086	0.966666	0.325513	0.442101
Hspa1b	15.9693	-0.0356086	0.107507	0.113612	0.736069	0.750396
Igfbp5	15.4376	0.295661	0.129477	5.23421	0.0221469	0.0579678
Rbms3	15.1183	0.155435	0.0744801	4.41901	0.0355407	0.0843499
Gas1	15.0032	0.51335	0.0838106	37.5779	8.78324e-10	1.25915e-08
Rpl14	14.8557	-0.0451496	0.0552036	0.725883	0.394221	0.499846
Eif1	14.7375	0.137474	0.0570638	5.89457	0.0151877	0.0426727
Gapdh	14.2832	0.485779	0.0663155	53.9486	2.05807e-13	5.0249e-12
Rpl7a	14.2177	0.155394	0.0578338	7.29842	0.00690152	0.0219104
Cst3	14.1655	0.169612	0.057768	8.68106	0.00321535	0.0114345
Rpl22	14.082	-0.0651004	0.0586323	1.28159	0.257604	0.377362
Meis2	13.6988	0.38565	0.0666062	33.7052	6.41285e-09	8.07614e-08
Gas5	13.6832	-0.227509	0.0637815	12.7917	0.00034816	0.00163178
Jun	13.5033	-0.428569	0.126868	11.3505	0.000754293	0.00325957
Mgp	13.2637	0.74875	0.112935	43.8922	3.46977e-11	6.06472e-10
Hspa8	13.2322	0.214835	0.0680964	10.0913	0.00148967	0.00589606
Rpl29	13.2031	0.00339109	0.057582	0.0522395	0.819211	0.825019
mt-Nd1	13.0139	0.248662	0.0618026	16.219	5.6425e-05	0.000323203
Cox8a	12.8887	0.362165	0.0583256	38.961	4.32362e-10	6.49625e-09
Hspb1	12.4224	0.180687	0.134238	1.81365	0.178072	0.293583
Rpl36a	12.3334	-0.221374	0.0604665	13.507	0.000237669	0.00117229
Rps15	12.0999	-0.134497	0.0527268	6.72877	0.00948702	0.0287072
Hmgb1	11.8574	0.0768937	0.0539563	2.20901	0.137207	0.24321
Gas6	11.636	0.190772	0.0536277	12.9684	0.000316797	0.00150325
H3f3a	11.6171	0.243491	0.0554727	19.6155	9.46963e-06	6.51287e-05
Rpl35	11.2293	-0.126818	0.0597133	4.72945	0.0296503	0.0728605
Nfia	11.2283	0.078293	0.0641049	1.58399	0.208187	0.327606
Ndufa11	11.1463	0.375993	0.0658095	32.9421	9.49449e-09	1.16206e-07
Calm2	11.0352	0.610388	0.0629791	94.6325	2.29225e-22	1.46798e-20
Rps6	10.8741	-0.229406	0.0571541	16.3382	5.2985e-05	0.000305064
Rpl12	10.818	-0.118608	0.0594853	4.17978	0.0409089	0.0947307
Rpl5	10.8167	-0.134638	0.0597726	5.24575	0.0220005	0.0576618
Fos	10.6094	-0.720995	0.21066	11.5308	0.000684529	0.00299621
Fabp5	10.5044	-0.20802	0.12933	2.59798	0.107	0.201395
Rack1	10.4757	-0.161022	0.0609578	7.07929	0.007798	0.0242926
S100a10	10.4258	0.00946426	0.0683936	0.116302	0.733081	0.748016
Hspa1a	10.4249	-0.129545	0.139631	0.862331	0.353087	0.465913
Atp1b1	10.3872	1.72212	0.0962677	313.105	4.59965e-70	7.18741e-67
Cox6c	10.2054	0.595056	0.0672544	78.8437	6.72244e-19	3.03598e-17
Rbfox1	10.1353	-0.237177	0.166552	2.02354	0.154878	0.265831
Gsn	10.1342	0.760256	0.104359	52.926	3.46358e-13	8.20028e-12
Rps25	10.0176	0.0862461	0.057046	2.55247	0.110122	0.206031
Pbx1	9.93031	0.410657	0.0739398	31.1204	2.42507e-08	2.7262e-07
Tagln	9.92868	0.703431	0.215204	10.6598	0.00109487	0.00451173
Auts2	9.92528	-0.151354	0.0769325	3.91332	0.047905	0.107579
Mir100hg	9.90607	0.449643	0.0867022	27.0521	1.98047e-07	1.93659e-06
Chchd2	9.85716	0.227814	0.060346	14.5352	0.000137566	0.000719895
Cd9	9.53932	0.86284	0.0654231	174.804	6.60608e-40	1.66495e-37
H2-T23	9.53424	-0.00767073	0.0632646	0.0838812	0.772105	0.781811
Gm36660	9.48582	12.1882	1.02175	4664.6	0	0
Anxa2	9.44462	-0.0802125	0.0768972	1.09577	0.295195	0.415279
Krt8	9.40255	0.133676	0.0790813	2.94077	0.0863694	0.171073
Krt17	9.24771	0.496229	0.138757	12.8153	0.0003438	0.00161328
Btf3	9.20542	0.213943	0.0618702	12.2509	0.000465031	0.00211945
Hsp90b1	9.11674	0.778387	0.0743686	110.134	9.15653e-26	7.94889e-24
Eef1b2	9.04168	0.0933987	0.0643792	2.2473	0.133848	0.238702
Tsc22d1	9.01854	-0.340141	0.0748587	20.7371	5.26854e-06	3.85062e-05
Ifitm2	8.98788	-0.158838	0.0614432	6.7542	0.00935274	0.0283836
Pfdn5	8.96077	0.127407	0.0576291	5.02535	0.0249789	0.0638821
Cox4i1	8.93067	0.138481	0.0557638	6.44087	0.0111524	0.0330428
Rpl23a	8.87724	-0.29427	0.0605144	23.9716	9.77692e-07	8.34831e-06
Gnas	8.85764	0.0761534	0.0532139	2.42701	0.11926	0.218624
Atp5e	8.79506	0.010408	0.0589495	0.235922	0.627167	0.660474
Isg15	8.78773	-0.637589	0.103517	37.5301	9.0015e-10	1.28807e-08
Npm1	8.63592	0.0323647	0.0660662	0.4234	0.515245	0.582915
Oat	8.59533	0.250071	0.0770627	10.6132	0.00112283	0.00461236
Pltp	8.56858	0.143058	0.0727007	4.00476	0.0453719	0.10296
Laptm4a	8.56849	-0.0164936	0.0566383	0.340833	0.559349	0.613274
Selenow	8.51998	0.0794974	0.0634906	1.7068	0.1914	0.307951
Txnip	8.5171	0.145317	0.0803658	3.3239	0.0682797	0.142372
Junb	8.48329	-0.461218	0.147218	9.75519	0.00178817	0.00688565
Krt14	8.46062	-0.502807	0.132155	14.3664	0.000150463	0.000779552
mt-Nd2	8.43677	0.0574172	0.06628	0.762798	0.382454	0.490096
S100a6	8.41471	-0.307171	0.134913	5.16917	0.0229912	0.0596938
Cxcl12	8.26639	0.316437	0.100494	10.0105	0.00155648	0.00611708
Oaz1	8.19801	0.357702	0.0663588	29.4423	5.76061e-08	6.0858e-07
Nfib	8.19494	0.393801	0.0662981	35.8199	2.16427e-09	2.95104e-08
Epcam	8.1306	0.574184	0.0662531	75.7073	3.28981e-18	1.3819e-16
Ubc	8.11078	-0.000992307	0.0774477	0.0565016	0.812113	0.818398
Tmem176a	8.04728	0.0315539	0.0816199	0.184658	0.6674	0.692391
Dstn	8.02223	0.276101	0.0762377	13.2847	0.000267582	0.00129852
Rps17	8.00257	-0.00255451	0.0594141	0.328348	0.566634	0.617653
Id3	7.81024	-0.242704	0.13237	3.35693	0.0669227	0.140141
Nme2	7.66431	0.346082	0.0681364	26.054	3.32002e-07	3.08801e-06
Hpgd	7.63475	1.34039	0.101537	172.838	1.77592e-39	4.08097e-37
Hmgn1	7.53459	0.156195	0.0720914	4.90618	0.0267607	0.0674674
Trp63	7.52746	0.125072	0.0874691	2.09036	0.148231	0.257821
Gpx4	7.51161	0.463742	0.0659063	50.1432	1.42929e-12	3.11059e-11
Selenof	7.4552	0.401266	0.0603993	44.8049	2.17675e-11	3.94593e-10
Prdx1	7.43545	0.472482	0.0637954	55.5541	9.09224e-14	2.34448e-12
Elob	7.39606	0.124573	0.0584357	4.83539	0.0278813	0.0695741
Eef2	7.37383	0.396308	0.0605321	43.607	4.01401e-11	6.96921e-10
Sparc	7.32129	0.408567	0.078795	27.1166	1.91548e-07	1.88684e-06
Hspa5	7.28854	0.323509	0.0780766	17.3894	3.04514e-05	0.000186163
Atpif1	7.28434	-0.0148611	0.0591036	0.409873	0.522034	0.587642
Rpl4	7.28344	-0.0481999	0.0569671	0.965297	0.325856	0.442152
Serf2	7.24329	-0.0566237	0.0580052	1.16304	0.280835	0.402633
Tpm1	7.21757	0.958266	0.086508	123.173	1.27791e-28	1.40624e-26
Anxa5	7.20782	0.337248	0.0688815	24.2152	8.61507e-07	7.47054e-06
Sec62	7.18002	0.823227	0.0686186	145.246	1.89704e-33	3.08784e-31
Jund	7.17512	0.0171648	0.0925686	0.0687263	0.7932	0.800992
Krt5	7.15708	0.342002	0.177186	3.73326	0.0533391	0.116904
Rpl31	7.1558	0.00893515	0.0559287	0.511477	0.4745	0.553248
Hnrnpa2b1	6.88871	0.311142	0.0569407	30.7781	2.89285e-08	3.21506e-07
Myl12a	6.86219	0.752989	0.0676916	124.93	5.27186e-29	5.96942e-27
Bsg	6.85575	0.556133	0.0663847	71.0897	3.41352e-17	1.26999e-15
Uqcrh	6.85187	0.129018	0.0631699	4.46035	0.0346905	0.0827593
Slc25a4	6.83868	0.54585	0.069354	62.9728	2.09583e-15	6.5238e-14
Atp5g2	6.83207	0.116876	0.0595192	4.16075	0.0413712	0.0956028
Sumo2	6.8319	0.290746	0.0603895	23.7058	1.12243e-06	9.44996e-06
Eef1d	6.78052	0.121722	0.0629175	3.86686	0.0492486	0.109683
Pfn1	6.73518	0.465121	0.0658193	50.6445	1.10705e-12	2.45026e-11
Nedd4	6.69996	0.0122087	0.0570995	0.632407	0.426474	0.520818
Acta2	6.68918	2.21441	0.302221	50.3683	1.27437e-12	2.78118e-11
Gng5	6.67825	-0.000519327	0.0595471	0.30287	0.582089	0.62798
Mif	6.61248	0.409967	0.067243	37.7236	8.15129e-10	1.1707e-08
Atp5h	6.58729	0.111595	0.0589354	3.90787	0.0480603	0.107746
Fxyd3	6.5764	0.578362	0.0715324	66.1073	4.2703e-16	1.43497e-14
Itm2c	6.56349	0.248429	0.0710197	12.4942	0.00040821	0.0018794
Atp5l	6.5446	0.0903573	0.0598075	2.70539	0.10001	0.191467
Ank3	6.53878	-0.18384	0.0779492	5.76013	0.0163939	0.0453721
Cstb	6.48671	-0.329337	0.0892542	13.7499	0.000208831	0.00104389
Gm10076	6.48327	-0.076405	0.0613541	1.7566	0.185049	0.301269
Ifi27	6.47175	0.565168	0.0852553	44.2662	2.86618e-11	5.08942e-10
Ddx5	6.41999	0.225319	0.0623401	13.9209	0.000190669	0.000959238
Zbtb20	6.367	-0.406224	0.0764332	28.4109	9.81118e-08	1.01261e-06
Igfbp4	6.34589	-0.0662389	0.115265	0.330034	0.565639	0.617054
Rbp1	6.27817	0.502407	0.0857966	34.5821	4.08642e-09	5.31234e-08
Eif3f	6.26714	0.0801467	0.0665594	1.57823	0.209016	0.328448
Prdx2	6.23109	0.44495	0.0663833	45.7796	1.32337e-11	2.49747e-10
Cox7c	6.20614	0.255653	0.0594068	19.2699	1.13481e-05	7.66315e-05
App	6.15664	0.57308	0.0669364	74.0362	7.66963e-18	3.0888e-16
Cpne8	6.15075	0.342723	0.0617296	31.0515	2.51276e-08	2.82071e-07
Rpl36al	6.13514	0.214825	0.0603512	13.1408	0.000288942	0.00138667
Rbm39	6.10374	-0.0397741	0.0535012	1.04255	0.307228	0.426592
Gabarap	6.04473	0.100448	0.0626869	2.84635	0.0915818	0.17857
Cox7a2	6.04334	0.783276	0.0598488	174.465	7.83343e-40	1.91258e-37
Calm1	6.02134	0.364957	0.0710641	26.8903	2.1534e-07	2.08482e-06
Nxn	6.01504	0.648671	0.0660513	97.7084	4.84763e-23	3.20971e-21
Pdia3	5.99586	0.295493	0.0683971	19.1892	1.18384e-05	7.95982e-05
Rpl22l1	5.93165	-0.12117	0.069034	3.44742	0.0633508	0.133773
Kcnma1	5.92604	-0.185815	0.0853534	4.83878	0.0278266	0.069482
Uba52	5.88905	-0.00511191	0.0676254	0.400071	0.527052	0.59029
Sfn	5.84874	0.740184	0.0913565	66.0161	4.4725e-16	1.48696e-14
Ptprz1	5.71885	0.168937	0.0900755	3.55756	0.059275	0.12695
Nfkb1	5.67377	0.392285	0.0761368	26.9944	2.04047e-07	1.98533e-06
Rsrp1	5.64771	-0.313327	0.0601454	27.4571	1.60616e-07	1.60063e-06
Perp	5.63584	0.429831	0.0679849	40.7204	1.75644e-10	2.78358e-09
Ptms	5.59333	0.0634956	0.0604915	1.38669	0.238964	0.357858
Lamp2	5.5874	0.00443176	0.0713059	0.62735	0.428329	0.522325
Ndufa4	5.56662	0.375944	0.0670705	32.2538	1.35296e-08	1.60161e-07
Ybx1	5.53749	-0.00724509	0.0656929	0.216016	0.642093	0.672656
Ctnnd2	5.51274	-0.336026	0.0961562	12.2977	0.000453506	0.00207207
Iigp1	5.46787	-0.126505	0.126511	1.01022	0.31485	0.433085
Eya4	5.44845	-0.114531	0.0875856	1.76856	0.183561	0.299595
Hsp90aa1	5.44655	-0.101197	0.0837115	1.65778	0.197903	0.314912
Spint2	5.42959	0.351565	0.0620818	32.5611	1.15504e-08	1.39696e-07
Txn1	5.38059	0.0538709	0.0667634	1.02074	0.312343	0.430926
Serbp1	5.36882	0.246702	0.0638689	15.8374	6.9025e-05	0.00038576
Atp5j	5.35622	0.185924	0.0616179	9.5897	0.00195672	0.00742851
Lifr	5.34506	0.693418	0.123827	31.6044	1.89005e-08	2.17161e-07
Fgf13	5.31588	-0.0248289	0.113026	0.074413	0.785017	0.793446
Dynll1	5.25173	0.415794	0.0796014	27.5695	1.5155e-07	1.51608e-06
Lpp	5.21506	-0.0102465	0.0710314	0.358325	0.549438	0.60675
Cox6b1	5.17949	0.05237	0.0632425	1.12669	0.288483	0.409208
Sem1	5.17499	-0.0525827	0.0617558	1.26616	0.260488	0.380553
Atp5d	5.14296	0.188142	0.0630658	9.33568	0.00224735	0.00837317
Wls	5.13235	0.486622	0.0641901	58.8272	1.72147e-14	4.82074e-13
Csrp1	5.09174	0.653745	0.0856886	58.8627	1.69068e-14	4.75154e-13
Sf3b6	5.08773	0.652552	0.0680757	93.6442	3.77659e-22	2.30519e-20
Clu	5.08737	1.14064	0.146578	60.0393	9.29814e-15	2.68068e-13
Palld	5.07493	0.388734	0.0851007	21.2255	4.08299e-06	3.09412e-05
Atp1a1	5.07465	0.577933	0.0676361	74.1519	7.2331e-18	2.92809e-16
Atp5b	5.06082	0.475775	0.0706847	46.3607	9.83706e-12	1.89303e-10
Klhl29	5.05182	0.557419	0.10005	31.251	2.26736e-08	2.57484e-07
Edf1	5.04131	0.30309	0.0676134	20.5967	5.66927e-06	4.1013e-05
Aldoa	5.00353	0.42631	0.0743416	33.3759	7.59592e-09	9.45014e-08
Atp5j2	4.99394	0.167324	0.0615681	8.02536	0.00461269	0.0156283
Pdgfa	4.94195	0.355392	0.0704169	25.8779	3.63706e-07	3.35098e-06
Sec61g	4.93204	0.262329	0.0646273	17.3269	3.14693e-05	0.000191338
Mdk	4.91964	0.705227	0.11969	34.8651	3.5335e-09	4.64768e-08
Ndufa7	4.88798	0.198264	0.0644879	9.97685	0.00158521	0.00621748
Psap	4.83667	0.233326	0.0602556	15.6076	7.794e-05	0.000431265
Gphn	4.8363	-0.282437	0.0749821	14.2707	0.000158306	0.000816507
Uqcr11	4.82945	0.128003	0.066152	4.29717	0.0381758	0.0894892
Hspe1	4.80749	-0.0330019	0.0765181	0.60412	0.43701	0.528217
Rhoa	4.79985	0.270506	0.0621726	20.0303	7.62242e-06	5.35557e-05
Hif1a	4.7944	0.164973	0.0730761	5.57197	0.0182502	0.0494242
Tmbim6	4.79402	0.416572	0.0625417	45.717	1.36633e-11	2.57232e-10
Cmss1	4.78649	-0.23323	0.0693015	11.412	0.0007297	0.00316555
Atp6v1g1	4.77901	0.696885	0.0684127	105.257	1.07283e-24	8.382e-23
Mast4	4.76435	-0.341655	0.084008	16.7508	4.26247e-05	0.000251911
Marcks	4.75811	-0.298925	0.0716688	17.842	2.40024e-05	0.000151662
Mir99ahg	4.75689	-0.0816558	0.0908721	0.885308	0.346752	0.460822
Cox5b	4.71928	0.267842	0.0646723	17.7005	2.58563e-05	0.000161612
Egr1	4.68548	-0.724377	0.185773	15.0077	0.000107071	0.00057534
Mid1	4.66948	0.232593	0.109128	4.62375	0.0315322	0.076581
Tpm2	4.66858	1.21995	0.105323	134.162	5.03666e-31	6.66974e-29
Tomm7	4.65636	-0.0222032	0.0608879	0.761437	0.382879	0.49048
H2bc4	4.62627	1.23769	0.100502	152.825	4.18385e-35	7.42919e-33
Nfix	4.62147	0.379787	0.0590148	43.2584	4.79666e-11	8.17968e-10
Immp2l	4.60001	0.240753	0.11039	4.85382	0.027585	0.0690774
Hint1	4.59667	-0.169959	0.0694073	6.20542	0.012736	0.0368679
Pard3	4.59445	0.274014	0.081021	11.7459	0.000609785	0.00270082
Srp14	4.58971	0.771876	0.0681683	131.147	2.29917e-30	2.89733e-28
Atp6v0c	4.58149	0.702068	0.0654009	117.519	2.20948e-27	2.21317e-25
Maml2	4.53299	-0.0901933	0.0941234	0.971547	0.324295	0.44103
Meis1	4.49299	-0.167673	0.0899789	3.53571	0.0600607	0.128317
Calr	4.46786	0.078274	0.0792987	1.24379	0.264742	0.385039
Nsa2	4.46019	0.193782	0.0711061	7.64094	0.00570581	0.018723
Fat3	4.44144	0.570885	0.121502	22.119	2.56263e-06	2.0265e-05
Cbr2	4.43707	-0.802684	0.0973231	67.6475	1.95505e-16	6.8497e-15
Bri3	4.43407	0.225977	0.0698665	10.8336	0.000996732	0.00414889
Park7	4.4214	0.190069	0.0629196	9.58086	0.00196616	0.00745568
Rnase4	4.41906	-0.476768	0.0939607	25.8686	3.65468e-07	3.36325e-06
Ywhae	4.40628	0.385467	0.0653323	36.2485	1.73697e-09	2.4062e-08
Ubl5	4.37641	0.154001	0.065073	6.25093	0.0124128	0.036133
Cdc42	4.37526	0.401065	0.0619996	44.0585	3.18709e-11	5.59568e-10
Slc25a3	4.37194	0.242008	0.0676571	13.5528	0.000231944	0.00115059
Cd63	4.3635	0.00212224	0.066307	0.138925	0.709352	0.727255
Hnrnpk	4.36326	0.327898	0.0688958	23.7806	1.07968e-06	9.12936e-06
Ppib	4.36302	-0.125337	0.0656577	4.00311	0.0454165	0.103002
Tmem59	4.33761	0.561602	0.0641257	78.3682	8.55188e-19	3.83999e-17
Slc25a5	4.33652	0.304302	0.0710806	18.7657	1.47799e-05	9.76948e-05
Fst	4.32696	1.2677	0.163107	59.6199	1.15064e-14	3.26907e-13
Plpp3	4.31526	-0.272883	0.089737	9.37849	0.00219546	0.00820425
Grcc10	4.31417	0.156296	0.0664318	6.24482	0.0124557	0.0362445
Cnn3	4.30993	0.475164	0.0700269	47.1731	6.49867e-12	1.28217e-10
Eef1g	4.29466	0.0928092	0.0647393	2.74444	0.0975932	0.187992
Uqcrb	4.2919	0.315672	0.065371	24.0599	9.33862e-07	8.02669e-06
Morf4l1	4.28607	0.169505	0.0626904	8.22218	0.00413815	0.0142429
Egfr	4.25986	-0.147536	0.0887072	2.8334	0.0923228	0.179611
Ndfip1	4.25829	0.541608	0.0641399	73.3538	1.08372e-17	4.27631e-16
Atxn1	4.24807	0.269937	0.0873919	9.71391	0.00182879	0.00701094
Bst2	4.24766	-0.498197	0.095798	26.9586	2.07862e-07	2.01993e-06
H2-DMb1	4.24041	1.01749	0.0658108	245.532	2.44647e-55	1.73766e-52
Arhgdib	4.23475	0.605855	0.0804729	57.4799	3.41449e-14	9.23094e-13
Pnrc1	4.23185	-0.411577	0.0727898	32.3919	1.26013e-08	1.50349e-07
Krt7	4.22792	0.46646	0.116507	16.1164	5.95647e-05	0.00033895
Rora	4.2279	-0.260455	0.0952583	7.51798	0.00610861	0.0197789
Atp6v0e	4.22174	1.20459	0.0729056	281.405	3.71071e-63	4.27772e-60
Anxa1	4.21887	-0.445538	0.0898528	24.5713	7.1612e-07	6.25145e-06
Tcf4	4.19033	-0.115891	0.0736971	2.86446	0.0905563	0.177234
Eif3k	4.18794	0.0828867	0.064152	1.98584	0.158777	0.27062
Ackr4	4.17825	-0.0959548	0.10143	0.973071	0.323915	0.440897
Gnb2	4.14943	0.622651	0.0659639	90.6611	1.7051e-21	9.86809e-20
Zfp36l1	4.13442	-0.894368	0.085103	111.05	5.77001e-26	5.06529e-24
Pik3r1	4.13295	-0.222638	0.0773036	8.50038	0.00355072	0.0124514
Npc2	4.11582	-0.438393	0.078359	31.6697	1.8275e-08	2.10594e-07
Enah	4.11299	0.251831	0.0800304	10.3477	0.00129638	0.00522901
H2-DMa	4.1038	-0.242395	0.0701045	12.2093	0.000475528	0.00216131
Itga6	4.10359	0.762873	0.0932153	67.5296	2.07544e-16	7.20686e-15
Kif5b	4.10197	0.912468	0.0675683	187.935	8.97578e-43	2.92199e-40
Nfkbia	4.09738	-0.474724	0.118443	16.0337	6.22264e-05	0.000352046
Son	4.0907	0.195494	0.0598603	11.516	0.00068999	0.00301673
Nrtn	4.08835	0.626654	0.0855663	54.144	1.86325e-13	4.58385e-12
Selenok	4.08033	0.203503	0.0609816	11.7501	0.000608402	0.00269744
Ndufb11	4.07643	0.184809	0.0643968	8.71319	0.00315916	0.0112706
Rbpms	4.07619	0.00336239	0.0784295	0.303004	0.582005	0.62798
Cfl1	4.07575	0.0771557	0.0716602	1.73916	0.187245	0.303623
Comt	4.05382	0.806048	0.0705044	133.43	7.27875e-31	9.47815e-29
Grm8	4.04842	0.343559	0.131152	6.94451	0.0084077	0.0259334
Ndufa13	4.04727	0.197835	0.0616596	11.056	0.000884022	0.00374966
Fgfr2	4.04182	0.695202	0.0861346	66.2602	3.95152e-16	1.34231e-14
Cnbp	4.02668	-0.0323876	0.0677751	0.888156	0.345978	0.460008
Ndufa2	4.01674	0.0679793	0.0639071	1.60088	0.205778	0.324567
Rps27l	4.01524	0.298162	0.0674253	20.6225	5.59354e-06	4.05026e-05
2410006H16Rik	4.01328	-0.235565	0.0833982	8.09061	0.00444953	0.0151441
Psma7	4.0121	0.11737	0.0692961	3.46252	0.0627744	0.132974
Ucp2	3.99324	0.728693	0.0798912	84.4603	3.92004e-20	2.02829e-18
Clta	3.97678	0.0558106	0.0683623	1.12768	0.28827	0.408981
Atp5a1	3.97177	0.100315	0.0654353	3.48918	0.0617712	0.131146
Atox1	3.9582	0.44179	0.0704724	39.95	2.60548e-10	3.99149e-09
Ost4	3.92921	0.220999	0.0675745	11.4662	0.000708751	0.00308494
Arf1	3.929	0.543696	0.0647238	72.7746	1.45333e-17	5.53895e-16
Foxp1	3.89465	-0.144734	0.0821038	3.28926	0.0697344	0.145019
Arid5b	3.89155	0.465282	0.0800466	34.4003	4.48665e-09	5.78452e-08
Pebp1	3.88671	0.0936472	0.0728331	2.31843	0.127849	0.230795
Apobec3	3.88451	0.119495	0.0713443	3.1342	0.0766661	0.156395
Ccnd2	3.88424	0.63092	0.127067	24.9969	5.7424e-07	5.09834e-06
Rbms1	3.884	0.00392887	0.076332	0.347119	0.555748	0.610956
Mrpl52	3.8811	0.0563661	0.0643032	1.14587	0.284415	0.405714
G0s2	3.87663	1.04544	0.140129	55.4663	9.50728e-14	2.43542e-12
Hexb	3.86817	0.461458	0.0818541	32.1301	1.44184e-08	1.69911e-07
Btg2	3.85242	0.279378	0.133367	4.42405	0.0354359	0.0841266
Aldh2	3.84527	0.36106	0.0743516	24.0718	9.28072e-07	7.98572e-06
Ndufb9	3.84449	0.21279	0.0666863	10.847	0.00098957	0.00412128
Prdx6	3.84382	0.16683	0.0793863	4.7089	0.0300068	0.0735393
Sdc4	3.84106	0.737343	0.0777735	91.4528	1.14288e-21	6.8163e-20
Nenf	3.8378	-0.0379839	0.0641785	0.574684	0.448404	0.535931
Sec61b	3.82915	0.5122	0.0712049	53.0031	3.33019e-13	7.95682e-12
Wnt4	3.81454	0.315495	0.0776903	16.7138	4.34633e-05	0.000255899
Eif5a	3.80044	0.199957	0.0749118	7.60309	0.00582684	0.0190641
Ybx3	3.79742	0.220126	0.0716666	9.78404	0.00176033	0.00680863
Atp5g1	3.79353	0.135597	0.0721129	3.95653	0.04669	0.105369
Etl4	3.79124	-0.0105175	0.0964696	0.156599	0.692308	0.712273
Tbca	3.78558	0.560164	0.0636623	79.5234	4.7656e-19	2.21629e-17
Eif3h	3.77013	0.282245	0.0701273	16.6732	4.4404e-05	0.000260457
Psmb1	3.76217	0.588082	0.0665216	80.6909	2.63933e-19	1.2729e-17
Ndufa6	3.73962	0.543824	0.0638252	74.6173	5.71413e-18	2.34971e-16
Xist	3.73892	-0.0826084	0.160883	0.264175	0.607266	0.645695
Mbnl2	3.72411	0.49305	0.070706	49.9516	1.57587e-12	3.41061e-11
Mrfap1	3.70652	0.229071	0.0736403	10.4445	0.00123016	0.00499024
Ptprd	3.70342	0.326759	0.107698	9.26586	0.00233465	0.00864075
Aplp2	3.69775	0.147028	0.0697811	5.39882	0.0201504	0.0538056
Marcksl1	3.68891	0.469848	0.0808722	34.3874	4.51633e-09	5.80363e-08
Tax1bp1	3.68626	0.072044	0.0662628	1.7865	0.181353	0.297482
Nedd8	3.68092	0.115201	0.0623211	4.2682	0.0388321	0.090864
Psmb9	3.67958	-0.393342	0.08353	22.5171	2.08286e-06	1.67767e-05
Txndc17	3.67458	-0.40527	0.0890748	20.9998	4.59337e-06	3.44084e-05
Mdh1	3.67365	0.175387	0.0715927	6.42584	0.0112472	0.0332228
S100a1	3.66503	0.235038	0.0849623	7.98508	0.00471643	0.0159522
Ncl	3.64511	0.00968519	0.0722595	0.664626	0.414932	0.514418
Nedd4l	3.64269	1.18206	0.108045	120.333	5.34928e-28	5.64783e-26
Hnrnpa3	3.64262	0.0516234	0.0685017	1.83423	0.175628	0.290532
Uqcr10	3.6358	-0.0210025	0.067785	0.652121	0.419355	0.516921
Nfat5	3.62814	-0.0376786	0.0913	0.360846	0.548037	0.605716
Mt1	3.62532	-0.653281	0.150791	18.6379	1.58049e-05	0.000103594
Snrpg	3.6168	-0.301758	0.0643823	22.4013	2.21227e-06	1.77095e-05
Csnk1a1	3.61654	0.184764	0.0662924	9.08801	0.00257291	0.00941112
Atp5mpl	3.61392	0.267679	0.0731003	14.4487	0.00014403	0.000749203
Lamp1	3.60225	-0.0098384	0.0677324	0.480607	0.488147	0.562646
Ube2d3	3.59278	0.387759	0.0676876	34.6435	3.95962e-09	5.16249e-08
Swi5	3.5876	0.217427	0.0642745	12.4653	0.000414573	0.00190645
Trpm3	3.58201	0.0301393	0.11761	0.0770179	0.78138	0.790077
Tns3	3.57081	-0.0123211	0.0785701	0.241539	0.623097	0.657552
Mgll	3.56841	-0.0214971	0.084091	0.347896	0.555307	0.610556
Plxdc2	3.55001	-0.74841	0.094825	62.4892	2.67911e-15	8.17651e-14
Rab2a	3.54435	0.178785	0.0617076	9.8558	0.00169297	0.00658069
H2az1	3.54229	0.569542	0.0828045	48.1715	3.90517e-12	8.05042e-11
Scn1a	3.53712	-0.6484	0.119638	29.3932	5.90834e-08	6.22128e-07
Akr1a1	3.52723	0.316166	0.0707961	21.1405	4.26813e-06	3.22192e-05
Alcam	3.51253	-0.310958	0.109153	8.32689	0.00390625	0.0135402
Myl12b	3.50964	0.257319	0.0674445	14.9646	0.000109549	0.000587039
Tma7	3.4883	0.387706	0.0682702	33.4641	7.25903e-09	9.07437e-08
Aopep	3.47682	0.483655	0.0809169	36.4938	1.53152e-09	2.13293e-08
Pde4b	3.47053	-0.302623	0.126552	5.74942	0.0164941	0.0455849
Arf4	3.4703	0.0623402	0.0813838	1.00373	0.316409	0.434239
Dst	3.47011	0.561998	0.0859359	43.4461	4.3581e-11	7.46707e-10
Cyb5a	3.46432	0.40651	0.0706546	33.7852	6.15454e-09	7.79342e-08
Pdcd4	3.46292	0.4157	0.0758341	31.2698	2.24551e-08	2.55746e-07
Id1	3.45446	0.0159886	0.128485	0.0264356	0.870841	0.873412
Rabac1	3.44336	-0.0438382	0.0667226	0.599751	0.438673	0.529076
Gnai2	3.44149	0.197057	0.0719703	7.95004	0.00480862	0.0162218
Rtraf	3.44031	0.18308	0.0709633	7.31521	0.00683735	0.0217686
Gm20186	3.43216	0.703022	0.093775	57.434	3.4951e-14	9.38392e-13
Map1lc3a	3.43067	1.07892	0.0844425	166.534	4.22988e-38	9.18002e-36
Cox7b	3.41729	0.071381	0.0721905	1.65614	0.198126	0.315138
Baz2b	3.41405	0.249834	0.083436	9.34964	0.0022303	0.00832552
Nop10	3.40991	-0.105955	0.0713716	2.5897	0.107561	0.202255
Atp6v1f	3.40266	0.445642	0.0668875	45.367	1.63367e-11	3.02462e-10
Pax1	3.39716	0.122854	0.082245	2.74183	0.0977528	0.188207
Gnb1	3.39409	0.370539	0.0644815	34.5221	4.21431e-09	5.46906e-08
Rbx1	3.38977	0.398104	0.0644181	39.4029	3.44786e-10	5.2307e-09
Eif4a1	3.38293	0.601703	0.0764336	63.5018	1.60219e-15	5.02726e-14
Ier2	3.37024	-0.37855	0.158538	5.69353	0.0170276	0.046745
Atp5pb	3.36967	0.412607	0.0705868	35.2972	2.83032e-09	3.76718e-08
Rtn4	3.36242	-0.0320129	0.075573	0.891675	0.345024	0.459307
Map1lc3b	3.356	-0.0360966	0.0740761	0.586245	0.443875	0.532674
Eif2s2	3.35353	0.577117	0.0716485	66.5849	3.35145e-16	1.14846e-14
Ywhaz	3.3451	0.380124	0.0692733	31.7113	1.78878e-08	2.06741e-07
Smdt1	3.34237	0.275217	0.0725232	15.1114	0.00010135	0.000547615
Dnaja1	3.3401	0.099399	0.092157	1.3926	0.237967	0.357064
Rgcc	3.33393	1.34717	0.115576	136.096	1.90117e-31	2.65248e-29
Atp5md	3.33127	0.496355	0.0694087	53.4172	2.69719e-13	6.48403e-12
Srrm2	3.33053	-0.00937801	0.0674184	0.912604	0.339424	0.454252
Mir205hg	3.32314	0.353769	0.0772289	21.2723	3.98457e-06	3.02247e-05
Cyrib	3.32023	0.0786668	0.0877932	1.13085	0.287594	0.40817
Ier3	3.31423	-0.275631	0.176363	2.43915	0.11834	0.217278
Cobl	3.30829	0.577793	0.089423	42.4546	7.2343e-11	1.20773e-09
Top1	3.30569	0.405169	0.0728087	32.4532	1.22101e-08	1.4654e-07
Zfand3	3.29948	0.250353	0.0780807	11.0132	0.000904672	0.00381035
Phlda3	3.27591	-0.180624	0.0760875	6.07607	0.0137025	0.0390295
Bcam	3.27372	0.0931641	0.0833755	1.34294	0.246517	0.366166
Dsp	3.26973	0.196738	0.0821333	6.21516	0.0126661	0.0367199
Ndufc1	3.25561	0.454657	0.0729572	40.2894	2.18988e-10	3.4015e-09
Ndufb10	3.2461	0.182917	0.0701717	7.34779	0.00671452	0.02143
S100a16	3.24197	-0.0317942	0.0728361	0.572901	0.449108	0.536588
Kazald1	3.24094	0.486456	0.0900627	29.5989	5.31343e-08	5.64814e-07
Luc7l2	3.22685	-0.0474762	0.0717967	0.671012	0.412699	0.51287
Fus	3.20834	0.0964843	0.0656142	2.54263	0.11081	0.206951
Mdh2	3.20771	1.00506	0.0725828	198.674	4.06586e-45	1.51269e-42
Rbbp8	3.20544	0.275379	0.0868774	10.4648	0.00121671	0.00494083
Cd200	3.20319	1.21094	0.0878414	194.698	2.99913e-44	1.0651e-41
Foxn3	3.20153	0.32803	0.0794464	17.764	2.50076e-05	0.000156642
Atp5c1	3.19409	0.309183	0.0717966	19.5671	9.71298e-06	6.66265e-05
Serpinb6a	3.17937	-0.337443	0.0814223	17.4172	3.00097e-05	0.000183751
Suco	3.17539	1.28178	0.0967229	179.874	5.1632e-41	1.34467e-38
Anp32b	3.17504	0.325381	0.074311	19.8207	8.50585e-06	5.89151e-05
Eid1	3.1739	0.0266963	0.078238	0.503098	0.478142	0.555581
Eif4a2	3.17226	0.30032	0.0653754	22.3827	2.23381e-06	1.78636e-05
Arf5	3.17003	0.100271	0.0697963	2.67733	0.101786	0.193853
Cd81	3.16867	0.280937	0.0911228	9.68782	0.00185493	0.00710074
Setbp1	3.16606	0.0831277	0.0990816	0.806455	0.36917	0.479522
Sub1	3.16567	0.280546	0.0693779	17.2204	3.32846e-05	0.000201279
Prxl2b	3.1639	0.184651	0.0985543	3.65754	0.0558161	0.121136
Psma2	3.15611	0.3869	0.0692671	32.5424	1.1662e-08	1.40828e-07
Ralbp1	3.14814	0.0912975	0.0725055	1.96201	0.161298	0.273258
Tcf12	3.14239	-0.166572	0.0873545	3.94296	0.0470679	0.1061
Serpinh1	3.14141	-0.205747	0.08607	6.09936	0.0135231	0.0387181
Tle5	3.13971	-0.112572	0.0795036	2.26058	0.132704	0.237204
Clic1	3.13867	0.306143	0.0713512	19.4961	1.00806e-05	6.88459e-05
Col12a1	3.13647	1.00906	0.122922	67.5402	2.06431e-16	7.2002e-15
Eya1	3.12689	-0.23059	0.0968572	5.7285	0.0166917	0.0459846
Pomp	3.1221	0.400563	0.0705173	33.8114	6.07229e-09	7.70175e-08
Ndufs5	3.11805	0.579909	0.0658878	79.5585	4.6816e-19	2.19026e-17
Tomm6	3.10836	0.0929109	0.0699666	2.54733	0.110481	0.206603
Cox7a2l	3.10829	0.0656475	0.0753137	1.10592	0.292971	0.413322
Psmb4	3.10741	0.509171	0.0763837	45.6816	1.39127e-11	2.61298e-10
Crim1	3.09073	0.349277	0.0992273	12.5614	0.000393787	0.00181943
Psma3	3.06152	0.351475	0.0687753	27.3039	1.7386e-07	1.72601e-06
Ube2b	3.0569	0.45943	0.0648562	52.6456	3.99497e-13	9.40141e-12
Niban1	3.05621	0.482191	0.0962348	25.6851	4.01913e-07	3.6574e-06
Set	3.05342	0.0873995	0.0765219	2.26305	0.132493	0.237097
Svil	3.05325	0.475062	0.0822883	34.0963	5.24516e-09	6.68522e-08
Atf3	3.04897	-0.549871	0.250781	4.76667	0.0290159	0.0715598
Phip	3.04226	0.14126	0.0887365	2.68633	0.101213	0.193249
Ywhaq	3.04002	0.586451	0.0762028	61.0722	5.502e-15	1.64073e-13
Dnajc13	3.03748	-0.115325	0.104217	1.32635	0.249456	0.369338
Hnrnpa1	3.03281	0.376257	0.0827799	21.6499	3.27227e-06	2.53382e-05
Id2	3.02315	0.887067	0.15681	32.0735	1.48447e-08	1.74147e-07
1810037I17Rik	3.01251	0.699534	0.0716552	98.1948	3.79192e-23	2.5762e-21
Reep5	3.00796	0.363581	0.0710792	27.1983	1.83622e-07	1.816e-06
Il7	3.00337	0.474414	0.0839228	32.3914	1.26044e-08	1.50349e-07
Etfa	2.9953	0.161607	0.0721734	5.94959	0.0147207	0.0415659
Sntb2	2.99347	0.139314	0.0834374	3.31697	0.0685681	0.142859
Arpc2	2.98844	0.31303	0.0779221	17.3348	3.13396e-05	0.000190698
Frmd4b	2.98705	-0.371015	0.0946219	15.5957	7.8433e-05	0.000433072
Myl9	2.97963	-0.303572	0.142086	4.5614	0.0327004	0.0789453
Dynlrb1	2.97853	0.646123	0.0722881	81.9985	1.3619e-19	6.69217e-18
Ppp3ca	2.97216	0.410139	0.0865874	22.9251	1.68436e-06	1.3809e-05
Nlgn1	2.96929	-2.32025	0.168318	181.333	2.47998e-41	6.6814e-39
mt-Nd5	2.96656	0.0662643	0.0830264	0.64209	0.422955	0.519004
Ndufc2	2.95726	0.213648	0.0722993	9.75798	0.00178546	0.00688107
Capzb	2.94481	0.281575	0.0720641	16.0198	6.26845e-05	0.000354257
Snrpb	2.92976	0.0412651	0.0681467	0.817745	0.36584	0.476862
Psmb2	2.92876	0.253351	0.0691682	14.312	0.000154877	0.000800299
Ext1	2.9248	-0.248223	0.104051	5.86849	0.0154142	0.0431621
Spcs1	2.92228	0.524686	0.0735856	52.2577	4.86753e-13	1.12515e-11
Rhoc	2.91466	0.718446	0.0776291	87.0767	1.04394e-20	5.58653e-19
Cox5a	2.91424	0.27173	0.0771382	13.1221	0.000291832	0.00139797
Slc38a2	2.90992	0.0742816	0.101254	0.581967	0.445542	0.533941
Tuba1b	2.90897	-0.0704529	0.0853743	0.905767	0.34124	0.455905
Macf1	2.88758	-0.181711	0.0859958	4.93925	0.0262534	0.0664241
H2aj	2.853	0.429208	0.0800626	29.8717	4.61612e-08	4.9609e-07
Romo1	2.84991	0.122177	0.0706765	4.07109	0.0436231	0.0997154
Psmb3	2.84867	0.455915	0.0688427	44.6736	2.32776e-11	4.19049e-10
Grip1	2.84167	-1.2914	0.130334	97.7328	4.7883e-23	3.19752e-21
F3	2.8332	1.37098	0.159907	72.8647	1.3885e-17	5.34401e-16
Tpd52	2.83053	0.592955	0.0705652	73.4284	1.04354e-17	4.13866e-16
Gnaq	2.82805	0.238003	0.0888097	7.74233	0.00539412	0.0179032
Tcf7l2	2.80933	0.346179	0.0836911	17.676	2.61907e-05	0.00016331
Cnpy2	2.80485	0.366613	0.0731678	25.9333	3.53421e-07	3.2618e-06
Rdx	2.80169	0.00267491	0.0748172	0.59684	0.439786	0.530156
Uqcrq	2.79564	0.0641083	0.0729898	1.40195	0.236398	0.355803
Ahnak	2.79272	-0.188843	0.0873702	4.83118	0.0279495	0.0697095
Snrpd2	2.79098	-0.0704479	0.0718873	1.51527	0.218336	0.338733
Ptges3	2.78691	0.0727424	0.0714007	1.77664	0.182563	0.298965
Tceal9	2.78619	0.187769	0.0795579	6.09474	0.0135585	0.0387746
Gdi2	2.78507	0.218056	0.0692508	11.5589	0.000674264	0.00295458
Lamb1	2.78275	1.561	0.0870735	336.973	2.91075e-75	7.58057e-72
Irf1	2.77512	-0.428137	0.145874	8.64782	0.00327453	0.0116238
Pcbp1	2.77369	0.316088	0.0761075	18.0215	2.18419e-05	0.000138628
Trim29	2.77243	0.199123	0.0765762	7.59368	0.00585732	0.0191398
Myo10	2.77007	0.107383	0.0943236	1.65018	0.198934	0.316231
Ssb	2.7692	0.102571	0.071434	2.85023	0.0913606	0.178306
Sh3glb1	2.75441	0.545312	0.0746061	55.2486	1.06211e-13	2.70303e-12
Cdh11	2.75334	-0.233966	0.145876	2.58215	0.108075	0.203027
Gria3	2.75258	-1.42636	0.11405	156.858	5.497e-36	9.98793e-34
Gpc5	2.75012	-3.71402	0.23105	231.906	2.28966e-52	1.19261e-49
Icam1	2.74983	0.215713	0.102253	4.56101	0.0327078	0.0789453
Fis1	2.7453	0.290996	0.0683468	19.2784	1.12979e-05	7.64248e-05
Frmpd4	2.74365	0.353828	0.17593	4.06016	0.0439063	0.100187
Tmed10	2.7429	0.216988	0.0711232	10.1355	0.00145442	0.00576952
Tgfbr3	2.74275	-0.533657	0.0909242	34.716	3.81483e-09	5.00089e-08
Bcl2	2.74262	-0.0938685	0.100874	0.978253	0.32263	0.439838
Ran	2.74046	0.166339	0.0789635	5.13063	0.0235073	0.0607549
Vamp8	2.73512	0.225111	0.0769952	8.85774	0.00291848	0.0105176
Mef2a	2.72889	0.453863	0.0789166	33.7779	6.17763e-09	7.81e-08
Oasl2	2.71917	-0.464391	0.0840455	30.6789	3.04465e-08	3.36939e-07
Septin7	2.71699	0.24564	0.0742604	11.9196	0.000555466	0.0024856
Glul	2.71646	0.84743	0.1036	67.6925	1.91089e-16	6.75557e-15
Camk1d	2.71203	0.108228	0.0914951	1.51144	0.21892	0.339378
Zfhx3	2.69852	0.0290716	0.0782061	0.507712	0.476131	0.554178
Limch1	2.69724	0.809623	0.0958592	73.093	1.23683e-17	4.85597e-16
Eya2	2.68889	0.31613	0.0805508	16.1083	5.98205e-05	0.000340158
Rheb	2.68707	0.499829	0.0708749	51.6085	6.77482e-13	1.55225e-11
Arpc3	2.68379	0.315955	0.0718716	20.1301	7.23478e-06	5.11541e-05
Arl6ip5	2.6829	0.423767	0.07506	32.9442	9.48425e-09	1.16206e-07
Snhg11	2.68156	0.909765	0.131111	48.5756	3.17803e-12	6.62132e-11
Bnip3l	2.67086	0.0870509	0.0886566	1.29772	0.25463	0.374684
Trmt112	2.66873	0.0171171	0.0691053	0.285184	0.593323	0.635536
Hcfc1r1	2.66625	0.222059	0.0781782	8.48848	0.00357402	0.0125163
Mat2a	2.66313	0.0786357	0.0995654	0.801298	0.370706	0.481037
Spcs2	2.65383	0.513791	0.0818405	40.6797	1.79345e-10	2.82505e-09
Ccn1	2.65305	-0.157176	0.214627	0.538229	0.463168	0.545838
Copz2	2.65199	0.84819	0.0824278	108.447	2.1449e-25	1.82153e-23
Micos10	2.64723	0.375633	0.0735873	27.3085	1.7345e-07	1.72413e-06
Dad1	2.64538	0.0908934	0.0734894	2.26127	0.132646	0.237153
Rnh1	2.64457	0.702762	0.0754589	89.1791	3.60641e-21	2.05671e-19
Eif4g2	2.64296	0.11316	0.0741462	3.56902	0.058867	0.126319
Ube2i	2.64157	0.368604	0.0692441	29.923	4.49555e-08	4.84322e-07
Clstn1	2.63522	0.0724194	0.0725349	1.38455	0.239327	0.358074
Ncor1	2.63515	0.106183	0.0726845	2.83836	0.0920379	0.17928
Tspan3	2.62472	0.222438	0.0767466	9.33868	0.00224366	0.00836343
Ktn1	2.61946	0.219191	0.0762576	8.85243	0.00292699	0.0105429
Chmp2a	2.61896	0.242656	0.0715252	12.1968	0.000478705	0.00217433
Nav2	2.61577	0.725368	0.106126	47.8117	4.69188e-12	9.54627e-11
Fkbp1a	2.61353	0.416966	0.0813202	27.78	1.35921e-07	1.36497e-06
Psma4	2.61057	0.247451	0.0763367	11.3532	0.00075317	0.00325651
Gstm2	2.6089	0.352131	0.0937311	14.3397	0.000152609	0.000789623
Amotl1	2.60802	0.115723	0.0824635	2.40645	0.120836	0.220685
Erbin	2.60634	-0.0158875	0.0827768	0.598072	0.439314	0.529768
Parm1	2.60483	0.501523	0.0921889	29.9954	4.33074e-08	4.67349e-07
Sh3bgrl3	2.60482	0.0825612	0.0806128	1.50211	0.220347	0.340901
Paip2	2.60389	0.253668	0.0694437	14.8464	0.000116628	0.000619873
Stat1	2.60285	-0.270333	0.0906452	9.14276	0.00249705	0.00916366
Cryl1	2.59629	1.38253	0.0923805	232.352	1.83022e-52	1.02139e-49
Isl1	2.59074	0.0918617	0.0856591	1.31997	0.250598	0.370468
Scand1	2.59065	0.206445	0.0746692	8.03318	0.00459281	0.0155813
Map3k20	2.59019	0.0225727	0.0852127	0.301791	0.582762	0.628363
Ldha	2.58824	-0.106577	0.0851816	1.97806	0.159595	0.271423
Usp34	2.5866	-0.0218102	0.0821647	0.476411	0.490052	0.563977
Rab14	2.57235	0.345188	0.0699036	25.5186	4.38135e-07	3.96198e-06
Psmb6	2.57109	0.227946	0.0714596	10.822	0.00100299	0.0041727
Rnasek	2.56973	0.842007	0.0821551	108.099	2.55719e-25	2.12546e-23
Tnc	2.56849	-0.590651	0.133392	19.6824	9.14418e-06	6.29458e-05
Ndufa3	2.56771	0.153873	0.0752345	5.07882	0.0242199	0.0622467
Drap1	2.56287	0.0809034	0.0732495	1.74315	0.186741	0.30316
Fat1	2.56147	0.361576	0.0892551	17.0503	3.64019e-05	0.000218776
Msi2	2.55668	0.488206	0.0914846	29.5844	5.35353e-08	5.68303e-07
Lmo4	2.55472	0.315748	0.0795658	16.3663	5.22048e-05	0.000301907
Ndufb1	2.55104	0.305427	0.0787171	16.3932	5.14687e-05	0.000298313
Zfp706	2.54821	0.456084	0.0773327	36.2392	1.74523e-09	2.41335e-08
Fmnl2	2.54501	0.133543	0.105418	1.73883	0.187287	0.303623
Atp5g3	2.53715	0.0575998	0.0775605	1.26203	0.261266	0.381475
Prrc2c	2.53575	0.14895	0.0730514	4.97003	0.0257903	0.0655495
Enho	2.53519	1.24475	0.103088	149.114	2.70812e-34	4.59969e-32
Selenos	2.53326	1.45816	0.101204	213.738	2.10047e-48	9.1172e-46
Rras	2.53267	0.00834116	0.0883904	0.185273	0.666881	0.692128
Atp5k	2.53093	-0.0843001	0.0771795	2.24668	0.133901	0.238742
Vapa	2.53031	0.31071	0.0698951	21.4563	3.61978e-06	2.78086e-05
Ndufa5	2.52948	-0.00257021	0.0739101	0.418697	0.517588	0.584719
Slco2a1	2.52657	0.650761	0.092592	50.4516	1.2214e-12	2.68056e-11
Vdac2	2.52482	0.753821	0.0759773	102.317	4.7315e-24	3.36066e-22
Atp5o	2.52134	0.17731	0.0786243	5.83646	0.0156974	0.0438171
Ezr	2.51472	0.187354	0.0815535	5.92241	0.0149495	0.0421511
Capns1	2.50895	-0.0594233	0.0775299	1.21334	0.270671	0.391621
Pabpc1	2.50634	-0.181338	0.0819803	5.91793	0.0149875	0.042243
Prdx5	2.50469	0.33949	0.0799463	18.7143	1.5184e-05	9.99432e-05
Tomm20	2.5045	0.772909	0.0745442	111.424	4.77881e-26	4.26828e-24
Abracl	2.5026	0.535396	0.0853378	40.1135	2.39625e-10	3.69998e-09
Srsf3	2.50005	0.0207852	0.0720875	1.27616	0.258615	0.37824
Cited2	2.49796	0.245542	0.112646	4.79309	0.0285742	0.0707831
Krt19	2.49271	0.981722	0.185111	28.0727	1.16845e-07	1.19024e-06
Prkar1a	2.49157	0.698984	0.075779	88.0062	6.52503e-21	3.59014e-19
Skp1	2.47856	0.392221	0.0823496	23.4781	1.26345e-06	1.05463e-05
2610307P16Rik	2.47674	0.185305	0.100268	3.64474	0.0562467	0.121868
Prelp	2.47383	0.491689	0.095314	26.925	2.11511e-07	2.05284e-06
Rere	2.47276	-0.225601	0.0882814	6.89483	0.00864456	0.0265174
Jmjd1c	2.46846	-0.154761	0.10364	2.44093	0.118206	0.217152
D8Ertd738e	2.4596	0.257216	0.0736816	12.9944	0.00031242	0.00148566
Srsf5	2.4561	-0.0321012	0.0733836	1.11777	0.290399	0.41118
Gabarapl2	2.45413	0.635479	0.0710646	82.5442	1.03331e-19	5.20854e-18
Nsd1	2.44512	0.131765	0.0853814	2.68183	0.101499	0.193573
Pfn2	2.44158	-0.0734156	0.0987747	0.726041	0.39417	0.499846
Sptbn1	2.43798	-0.090635	0.0823018	1.64708	0.199357	0.316645
Ndufb8	2.43718	0.0950188	0.0748277	2.25058	0.133564	0.238305
Gsk3b	2.43412	0.0510015	0.0765299	1.62704	0.202112	0.319851
Hspd1	2.4318	0.408752	0.0809855	26.7211	2.35036e-07	2.25041e-06
Ctnna1	2.43059	0.165727	0.0804363	5.03012	0.0249102	0.0637481
Micos13	2.4236	0.314564	0.0772644	17.6953	2.59266e-05	0.000161793
Slc3a2	2.4226	0.465417	0.0849608	30.4273	3.4661e-08	3.7875e-07
Pcbp2	2.41926	-0.285114	0.0726184	16.3206	5.34807e-05	0.000307691
Synpo2	2.41612	-0.105754	0.122804	0.86114	0.35342	0.466194
Atrx	2.40868	-0.0454228	0.082313	0.743615	0.388505	0.495412
Dpp6	2.40793	-0.960388	0.139125	47.442	5.6656e-12	1.13501e-10
Cbx3	2.40561	0.168284	0.0744022	6.17911	0.0129267	0.0373508
Cnn2	2.39652	0.272299	0.108264	6.49901	0.0107935	0.0320888
Ddr1	2.39265	0.370264	0.0773479	23.6966	1.12782e-06	9.48511e-06
Sox9	2.39097	0.654285	0.110152	35.8043	2.18171e-09	2.96964e-08
Arl6ip1	2.38138	0.19544	0.0783151	6.70973	0.00958884	0.0289817
Stag1	2.3794	-0.223472	0.0903846	6.39493	0.0114447	0.0337551
Manf	2.3725	0.956183	0.104426	85.3142	2.54535e-20	1.33468e-18
Psmb10	2.36936	-0.416909	0.103318	16.6036	4.60624e-05	0.000268772
Arhgef12	2.36471	0.0829055	0.082896	1.43478	0.230986	0.35041
Sf3b1	2.36265	0.0578648	0.0811973	1.72926	0.188505	0.304863
Cct7	2.36087	0.693273	0.0808471	76.4319	2.27941e-18	9.67881e-17
Psme1	2.3564	-0.375526	0.0939782	15.99	6.36766e-05	0.000358691
Naaladl2	2.3563	-0.980067	0.130199	56.3392	6.0986e-14	1.59359e-12
Hsbp1	2.35467	0.0791689	0.0744347	1.91223	0.166716	0.280119
Snrpe	2.35138	-0.162291	0.0749333	5.68892	0.0170723	0.0467928
Fosb	2.34929	-1.08995	0.197209	30.0039	4.31172e-08	4.6594e-07
Ndufb5	2.34776	0.0889355	0.0777912	1.79344	0.180508	0.296408
Stmp1	2.3471	-0.252415	0.0844645	9.48635	0.00207006	0.00780191
Smim14	2.34195	0.23883	0.0754561	11.2497	0.000796338	0.00342522
Zfp36	2.33983	-0.543858	0.190146	8.15953	0.00428355	0.0146658
Nucks1	2.33922	0.241584	0.077048	10.5355	0.00117105	0.00478526
Gm56555	2.33818	0.176493	0.093753	3.81096	0.0509182	0.112606
Kansl1	2.33796	-0.132815	0.0932727	2.29066	0.130155	0.233905
Anp32a	2.33479	0.242622	0.076413	11.0927	0.000866663	0.00368202
Boc	2.33377	0.489192	0.0936007	27.7593	1.37384e-07	1.3779e-06
Mcc	2.33102	-0.232859	0.105371	5.17312	0.022939	0.059582
Cux1	2.33032	0.0695217	0.0769891	1.85663	0.173015	0.287635
Tpr	2.31946	0.236141	0.081296	8.84014	0.00294677	0.0106048
Il33	2.31772	0.831073	0.194105	18.3698	1.81917e-05	0.000117077
Smarca2	2.31248	-0.171195	0.078952	5.10734	0.0238248	0.0613727
Sesn3	2.31188	0.118402	0.0875448	2.3655	0.124044	0.225543
Sp100	2.31176	-0.420718	0.0849995	25.1601	5.27614e-07	4.70577e-06
Eif3e	2.30999	-0.0533687	0.0784826	1.39708	0.237213	0.35644
Pdia6	2.30969	0.0671497	0.0897962	0.871272	0.350603	0.463889
Pdcd5	2.30804	-0.0257599	0.0779734	0.683304	0.408451	0.509921
Lima1	2.30787	0.042198	0.0857864	1.00831	0.315309	0.433304
Scmh1	2.29844	0.098132	0.0925681	1.38536	0.239191	0.358007
Atxn10	2.29253	0.196562	0.0742379	8.48053	0.00358968	0.0125542
Stox2	2.28914	0.14995	0.11085	2.08094	0.149148	0.258782
Lsm3	2.2865	1.20423	0.0995702	150.106	1.64328e-34	2.85309e-32
Pafah1b1	2.28587	0.167828	0.0796572	5.32511	0.0210202	0.0555961
Dsc3	2.28412	0.390456	0.0889946	19.9652	7.88627e-06	5.49647e-05
Fto	2.28318	0.710468	0.0975549	54.2728	1.74503e-13	4.342e-12
Ndufb7	2.28164	0.277622	0.0744684	14.6947	0.000126404	0.000665496
Ndufa12	2.27798	0.100051	0.0772963	2.41748	0.119988	0.219546
Eif3i	2.27655	0.159628	0.0765966	4.97027	0.0257865	0.0655495
Crip2	2.27462	-0.114405	0.105632	1.21577	0.270192	0.391072
Ndufs7	2.27391	0.0326649	0.0761225	0.537837	0.46333	0.545838
Ndufab1	2.26882	0.495628	0.0845168	35.5878	2.43811e-09	3.28431e-08
Eif3m	2.26758	0.073917	0.0727107	1.98085	0.159301	0.271131
Cox17	2.26548	1.39343	0.0872657	270.519	8.74624e-61	7.59271e-58
Matr3	2.26383	-0.0144714	0.0777855	1.21547	0.270251	0.391086
Dlg1	2.2617	0.170368	0.0940517	3.90907	0.0480263	0.107701
Exoc4	2.25809	-0.311226	0.098962	10.2871	0.00133966	0.0053786
Kif21a	2.25218	0.595366	0.0884528	46.0699	1.14106e-11	2.17442e-10
Nipbl	2.25156	-0.0136278	0.0848862	0.306765	0.579672	0.625982
Hnrnpa0	2.25013	-0.249838	0.0728501	12.9631	0.000317689	0.00150613
Ndufa8	2.24626	0.366627	0.0812409	21.306	3.91509e-06	2.97844e-05
Kmt2e	2.24619	-0.170196	0.0807038	4.80229	0.0284219	0.0706054
1700019D03Rik	2.24569	1.18487	0.100776	141.849	1.04942e-32	1.60767e-30
Metap2	2.24183	0.260771	0.0737873	14.0916	0.000174122	0.000884537
Myh9	2.23887	0.135171	0.0859051	2.90506	0.0883019	0.173998
Tmem50a	2.23836	0.311333	0.0732817	18.9038	1.37478e-05	9.1414e-05
Maml3	2.23787	0.0402968	0.113274	0.23322	0.629146	0.661934
Itgb1	2.23774	0.32163	0.0783227	18.5228	1.67885e-05	0.000109216
Ncoa1	2.23031	0.000485097	0.090175	0.296485	0.586094	0.630364
mt-Nd3	2.22925	0.0702404	0.0894091	0.669055	0.413381	0.513392
Spop	2.22724	0.174488	0.0778487	5.57861	0.0181811	0.0493055
Sox4	2.21958	0.0443521	0.113457	0.275723	0.599519	0.640158
Bmpr1a	2.2178	0.118	0.0867688	2.48114	0.115219	0.212735
Phf21a	2.21656	0.198291	0.0969884	4.45291	0.0348418	0.0830441
Vdac1	2.21439	0.577863	0.0760667	60.004	9.46665e-15	2.71923e-13
Pdlim1	2.21304	0.025656	0.0864071	1.07364	0.300124	0.419626
Dync1i2	2.21037	0.150575	0.0795886	4.2114	0.0401532	0.0934794
Snrpf	2.20527	-0.00470653	0.0751765	0.564753	0.452352	0.538754
Hnrnpc	2.20244	0.0488434	0.0777934	1.69679	0.192708	0.309354
Ppp1r12a	2.19526	-0.239383	0.0878517	7.96311	0.00477403	0.016126
Rbm3	2.19448	0.497594	0.0835529	37.0285	1.16415e-09	1.63883e-08
Esd	2.19287	0.136079	0.0773427	3.83146	0.0502992	0.111581
Cox6a1	2.19261	0.546437	0.0791934	48.9524	2.62255e-12	5.49329e-11
Ttc3	2.19133	-0.00539834	0.0848604	0.403972	0.525045	0.58927
Mtdh	2.19027	0.270735	0.0775739	13.1924	0.000281084	0.00135395
Srsf2	2.18898	0.234642	0.0786925	9.35292	0.0022263	0.00831459
Dnajb1	2.18154	-0.849684	0.197876	18.2799	1.9071e-05	0.000122233
Chd6	2.17802	0.209056	0.085108	6.89828	0.00862785	0.026487
Gclc	2.17691	1.05491	0.1301	66.1031	4.27938e-16	1.43497e-14
Snu13	2.17604	0.328652	0.0775897	19.0069	1.30248e-05	8.69027e-05
Strn3	2.1737	0.124848	0.0904151	2.29217	0.130028	0.233811
Elf1	2.17325	0.166118	0.0829058	4.67964	0.0305222	0.0745598
Ndufs4	2.17184	0.355176	0.0742447	24.7024	6.69008e-07	5.8664e-06
Tmem158	2.17084	1.10647	0.112217	98.3479	3.50982e-23	2.40546e-21
Abtb3	2.17046	0.362625	0.107102	12.1186	0.000499218	0.00226109
Ubxn1	2.16987	0.0127631	0.0770797	0.460635	0.497327	0.569488
Rbfox2	2.16525	0.350153	0.0853386	17.4714	2.91667e-05	0.000179291
Pbx3	2.16226	-0.0845228	0.120784	0.555007	0.456279	0.54145
Krtcap2	2.16074	0.130676	0.0765285	3.39173	0.0655242	0.137581
Fbxl17	2.16026	-0.0345496	0.100074	0.356153	0.55065	0.607488
Sarnp	2.15921	0.305553	0.0766164	16.8352	4.07709e-05	0.000242607
Pura	2.1543	0.117557	0.0780489	2.76282	0.096478	0.186165
Canx	2.15403	0.30749	0.0814962	15.3149	9.09945e-05	0.000497509
Psme2	2.1534	0.423899	0.0872883	24.1506	8.90895e-07	7.70826e-06
Hnrnpu	2.14744	0.0773089	0.0809486	2.02615	0.154612	0.265564
Atxn7l3b	2.14735	-0.0197512	0.0779584	0.485234	0.486061	0.561158
Arhgap6	2.14199	-0.694266	0.144864	22.9222	1.6869e-06	1.38152e-05
1110004F10Rik	2.13863	0.213397	0.0830105	7.26719	0.00702257	0.0221866
Hnrnpf	2.13578	0.0721266	0.0766216	2.78707	0.0950278	0.184094
Vav3	2.13419	0.190027	0.115533	2.85046	0.0913477	0.178306
Lrch1	2.131	-0.0747488	0.098899	0.965618	0.325775	0.44212
Hras	2.12369	1.17055	0.0931461	163.846	1.6344e-37	3.45123e-35
Srsf11	2.12369	0.0745515	0.0756362	1.55469	0.212444	0.332364
Rbm25	2.12214	-0.0741346	0.0794833	1.48666	0.222735	0.342767
Dnajc3	2.11876	0.736845	0.0872173	73.4317	1.04179e-17	4.13866e-16
Jak1	2.11799	0.0737051	0.0888635	1.18989	0.275352	0.397071
Maged1	2.11104	0.0107504	0.0828	0.611287	0.434303	0.52608
Prnp	2.11063	-0.212956	0.0790402	8.10834	0.00440619	0.0150199
Cope	2.10861	0.29497	0.0794384	14.6134	0.000131972	0.000691548
Psmd7	2.10612	0.449884	0.0846462	29.4786	5.65368e-08	5.99352e-07
Sdk1	2.10166	-2.46729	0.163521	225.265	6.42699e-51	3.13838e-48
Defb1	2.09893	0.702377	0.119508	34.8706	3.52359e-09	4.64246e-08
Glrx3	2.09537	0.0425006	0.0839583	0.830355	0.36217	0.47342
Ndufb2	2.09494	0.0587251	0.0799744	1.3785	0.240356	0.359064
Rock2	2.09272	0.453077	0.0979226	22.0523	2.65324e-06	2.0918e-05
Snx3	2.08872	0.0755443	0.0803389	1.8438	0.174506	0.289481
Aimp1	2.08844	0.158821	0.0809563	4.44842	0.0349336	0.0832088
Rtp4	2.08816	-0.86097	0.102258	71.2523	3.14342e-17	1.18075e-15
Papss1	2.07874	0.249873	0.0761766	11.7918	0.000594931	0.00264553
Tnrc6b	2.07636	-0.0944723	0.0906652	1.53262	0.21572	0.335983
Pclo	2.07606	-0.364557	0.100868	13.309	0.000264135	0.0012846
Anapc13	2.06911	-0.0861363	0.0792019	1.78615	0.181396	0.297491
Senp6	2.06636	-0.0140749	0.0775487	0.736741	0.390707	0.497165
Pdpn	2.06435	-0.0284403	0.100394	0.29973	0.584052	0.629274
Oxr1	2.06127	-0.257027	0.0963514	7.36166	0.00666293	0.0213175
Uqcrc2	2.06009	0.540999	0.0809725	46.3014	1.01389e-11	1.94632e-10
BC031181	2.05979	0.815705	0.0816592	103.171	3.07491e-24	2.26644e-22
Arid1b	2.05629	-0.141481	0.0946115	2.61858	0.105619	0.199613
Arpc1b	2.05629	0.493885	0.0820852	37.3546	9.8489e-10	1.40419e-08
Sulf1	2.05194	0.236173	0.100519	5.8535	0.0155461	0.0434724
Rbbp7	2.05035	0.176503	0.0817575	5.80959	0.015939	0.0443804
Lncpint	2.0488	0.408246	0.107629	14.6898	0.000126729	0.000666759
Zfr	2.04638	0.135733	0.0865546	2.94363	0.0862169	0.171011
Frmd6	2.04622	-0.435683	0.104486	17.8004	2.45332e-05	0.00015433
Psmb5	2.04582	0.325927	0.0845318	15.5897	7.8684e-05	0.000434151
Kalrn	2.04445	0.447683	0.118945	14.5298	0.000137963	0.000721487
St13	2.04315	-0.160047	0.0776043	5.65503	0.0174054	0.0475152
Tubb5	2.0411	0.169066	0.0923644	3.63103	0.0567118	0.122604
Rer1	2.03944	0.522437	0.080583	43.5765	4.07703e-11	7.0473e-10
Parp8	2.03884	0.493786	0.105414	22.6317	1.96224e-06	1.592e-05
Cox14	2.036	0.235308	0.0797385	9.44477	0.00211752	0.0079463
Rab10	2.01436	-0.0479935	0.0824584	1.15875	0.281725	0.403357
Tmem258	2.0128	0.294868	0.0828416	13.8254	0.000200605	0.00100634
Igfbp2	2.01226	0.0735484	0.168874	0.197426	0.656807	0.683762
Sfr1	2.01026	0.424709	0.0841718	26.2008	3.07688e-07	2.88246e-06
Eloc	2.01009	0.567297	0.0768598	56.8117	4.79615e-14	1.2687e-12
Cops9	2.00953	0.357884	0.0802543	21.3632	3.79988e-06	2.89926e-05
Chmp5	2.00947	0.926727	0.0814851	135.279	2.86898e-31	3.93252e-29
Macrod2	2.00834	0.506155	0.169675	9.00685	0.0026897	0.00978171
Ube2r2	2.006	0.0808328	0.0750578	2.20145	0.137881	0.243933
Psmb8	2.00218	-1.09966	0.096942	131.686	1.75244e-30	2.24457e-28
Sumo1	2.00108	-0.0109782	0.0782744	0.811373	0.367715	0.478587
Dip2c	1.99853	-0.595324	0.106234	31.9867	1.55229e-08	1.81558e-07
Pax9	1.99722	0.505065	0.0910316	31.2273	2.29518e-08	2.60265e-07
Vcp	1.99522	0.235255	0.083135	9.20185	0.00241771	0.00891018
Hmgn2	1.99122	0.304222	0.0954785	10.6499	0.00110077	0.00453126
Wnk1	1.99084	-0.124014	0.0945049	2.05717	0.151491	0.2618
H2az2	1.98802	-0.121137	0.0782156	2.60332	0.10664	0.200851
Atp6v0b	1.97963	0.450132	0.077873	34.6727	3.90054e-09	5.09614e-08
Pfdn1	1.97725	0.109999	0.079273	2.4646	0.116438	0.21466
Mbnl1	1.97657	-0.0696462	0.0952848	0.692298	0.405384	0.508094
Fkbp4	1.97469	0.23416	0.0835757	8.70109	0.00318021	0.011325
Cd151	1.9746	0.64381	0.0868938	56.6011	5.33832e-14	1.40432e-12
Gpx1	1.96902	0.19213	0.0965437	4.03948	0.0444476	0.101166
Nol7	1.96252	0.164723	0.0862649	3.8882	0.0486266	0.108766
Cxcl10	1.96239	-0.501268	0.388113	1.65401
H1f0	1.96203	0.526011	0.116131	20.9468	4.72215e-06	3.52644e-05
Ndufb3	1.95951	0.124914	0.0791025	3.43342	0.0638898	0.134838
Tfdp2	1.95837	-0.448769	0.101173	20.3052	6.60218e-06	4.71938e-05
Cd164	1.95679	0.865277	0.0926015	90.771	1.61298e-21	9.40466e-20
Lamtor4	1.95536	0.130717	0.0799406	3.439	0.0636741	0.134419
Rchy1	1.95399	-0.193103	0.0780307	6.50019	0.0107863	0.0320797
Psenen	1.95391	-0.119965	0.0800319	2.77921	0.0954951	0.184679
Cyb5r3	1.9539	0.194469	0.0851057	5.78591	0.0161552	0.0448505
Dennd2b	1.95305	-0.11836	0.0998411	1.70563	0.191554	0.308134
Lrpap1	1.95166	0.236926	0.0842	8.51971	0.0035132	0.0123309
Ddx39b	1.95039	0.456161	0.0819763	32.0769	1.48188e-08	1.74104e-07
Ddit4l	1.9492	2.29963	0.194064	136.933	1.24738e-31	1.80478e-29
Ctnnb1	1.94847	0.0687585	0.0818961	1.8062	0.178965	0.294494
Cebpb	1.94631	0.213327	0.103228	4.26865	0.0388218	0.090864
Ranbp1	1.94417	0.315958	0.0855356	14.1487	0.000168917	0.000863873
Srsf7	1.94392	-0.0684114	0.0835438	0.879862	0.348239	0.461943
Ndufa1	1.94285	-0.0249979	0.0807747	0.950197	0.329669	0.445315
Ptprm	1.94197	0.998213	0.126646	62.9141	2.15921e-15	6.66793e-14
Wdr83os	1.93495	0.220473	0.078578	8.64918	0.00327209	0.0116238
Sf3b2	1.93434	0.244879	0.0813686	10.2073	0.00139888	0.00558195
Dpyd	1.933	-0.821336	0.112631	53.7729	2.25056e-13	5.47777e-12
Cetn3	1.93002	0.078586	0.0833531	1.58242	0.208412	0.327697
Cfdp1	1.92971	0.0942882	0.0778604	2.39903	0.121411	0.221631
Arpc1a	1.92924	0.517417	0.0814725	41.7677	1.02789e-10	1.68717e-09
Galnt18	1.9286	-0.0873657	0.103568	1.06282	0.302572	0.421988
Vcam1	1.92789	-0.479844	0.11224	18.6562	1.56534e-05	0.000102877
Plaat3	1.9272	0.0483832	0.0834671	0.876725	0.3491	0.462713
Arid4b	1.92718	-0.0349339	0.0935291	0.673477	0.411842	0.51215
Pde7a	1.92667	0.00548286	0.119934	0.0480554	0.826482	0.831377
Actn4	1.92546	0.371825	0.0944996	15.9957	6.34856e-05	0.000357874
1700025G04Rik	1.92411	-0.201942	0.0853046	6.60082	0.0101932	0.0305366
Snrnp70	1.92179	-0.0141546	0.0783774	1.04093	0.307606	0.426879
Bcap31	1.91978	0.239624	0.0818015	9.60092	0.0019448	0.00739404
Xaf1	1.91825	-0.667794	0.0972441	47.6648	5.0568e-12	1.02354e-10
Cald1	1.9176	0.794806	0.142898	31.133	2.40939e-08	2.71247e-07
Etfb	1.91737	-0.133379	0.0822802	2.8296	0.0925414	0.179992
Ppm1h	1.91668	0.65085	0.11599	32.3539	1.28499e-08	1.53043e-07
H2-Q4	1.91628	-1.0795	0.0930029	139.567	3.31133e-32	4.8814e-30
Mrps21	1.91318	0.0485351	0.0811156	0.798154	0.371646	0.482097
Rsrc2	1.91276	0.200402	0.0800127	7.29305	0.00692219	0.0219529
Ifit1	1.91144	-1.25671	0.133009	89.0379	3.87324e-21	2.19287e-19
Gm4951	1.91004	-0.806009	0.136898	34.5191	4.22097e-09	5.46906e-08
Mycbp2	1.90963	-0.696707	0.0972586	52.3449	4.65597e-13	1.08265e-11
Mrpl30	1.9078	-0.0891363	0.0821177	1.42302	0.232907	0.352279
Nfe2l2	1.90585	0.282573	0.0856253	11.7126	0.000620774	0.00274483
Mpc2	1.90377	0.0151619	0.0808108	0.575484	0.448088	0.535799
Ankrd12	1.90235	0.0394387	0.0884396	0.674706	0.411416	0.511764
B230219D22Rik	1.90017	0.668618	0.0812157	70.7241	4.10847e-17	1.5213e-15
Ssr4	1.89981	0.272473	0.0799004	12.0447	0.00051939	0.00234025
Sqstm1	1.8983	0.112164	0.091554	1.86416	0.172145	0.286591
Atp6v1e1	1.89804	1.12811	0.0914818	158.75	2.1217e-36	4.04314e-34
Mlf2	1.89743	0.508725	0.082349	39.6181	3.08813e-10	4.70323e-09
Arpp19	1.89625	0.189422	0.0770036	6.68457	0.00972511	0.0292915
Arl1	1.89534	0.295145	0.0818133	13.9768	0.000185084	0.00093475
Ndfip2	1.89377	0.821666	0.0818319	105.135	1.14108e-24	8.82696e-23
Arhgap24	1.89365	1.17693	0.143274	68.2208	1.46173e-16	5.21484e-15
Tecr	1.89365	0.137374	0.0796271	3.45134	0.0632003	0.133559
Six1	1.89096	0.689675	0.0907974	60.3851	7.79996e-15	2.29102e-13
Eif3c	1.89044	0.151932	0.0867677	3.6349	0.0565799	0.122352
Ston2	1.88967	0.477305	0.102613	22.1596	2.50901e-06	1.98813e-05
Ankrd11	1.88804	0.121782	0.0857635	2.4415	0.118164	0.217124
Crebbp	1.8855	-0.0904118	0.0913119	1.48391	0.223163	0.343088
Sf3b5	1.88359	0.164214	0.0828617	4.46984	0.0344982	0.0824517
Prkn	1.88158	0.0365308	0.126971	0.231791	0.630199	0.662773
Ptov1	1.88073	0.205086	0.0831755	6.68562	0.00971937	0.0292856
Smap1	1.87652	0.302773	0.0817962	14.763	0.000121906	0.000644858
Sh3d19	1.87508	0.0297482	0.0985424	0.135517	0.712779	0.730162
Tpm4	1.86939	0.500451	0.0935174	29.7123	5.01159e-08	5.34489e-07
Morf4l2	1.86904	0.320483	0.0825337	16.9448	3.84819e-05	0.000230567
Erp29	1.86843	0.333817	0.0835883	16.8297	4.08887e-05	0.000243123
Kdelr1	1.8657	0.168412	0.085259	4.48903	0.0341129	0.0818564
Anapc11	1.86562	0.0947257	0.0844316	1.5005	0.220595	0.340901
Mrps33	1.86496	0.182625	0.0815088	5.69029	0.017059	0.0467893
Ptpn13	1.86456	0.212087	0.104605	4.50255	0.0338443	0.0812865
Srrm1	1.85878	0.0296575	0.0821561	0.918198	0.337949	0.45282
Cdh1	1.8569	0.194465	0.0985978	4.12101	0.0423538	0.0973413
Ech1	1.85589	-0.112399	0.0829305	2.41922	0.119854	0.219405
Setd5	1.8539	0.0726182	0.090208	1.02382	0.311614	0.430301
Fam172a	1.85301	-0.159492	0.0974014	2.89625	0.0887857	0.174775
Ppp1cb	1.85298	0.531941	0.0882545	38.0083	7.04444e-10	1.02492e-08
Snrpd3	1.84875	0.213757	0.0835523	7.33009	0.00678097	0.0216067
Tmed2	1.84638	0.484456	0.0831447	35.5608	2.47218e-09	3.31875e-08
Arglu1	1.84624	0.0983332	0.0824713	2.13121	0.144326	0.25266
Efna5	1.84585	-0.394332	0.119068	11.1455	0.000842367	0.00359837
Snrpd1	1.84533	0.0201261	0.078454	0.964688	0.326009	0.442282
Rab11b	1.84266	0.175976	0.0789932	6.15067	0.0131362	0.0378441
Arih1	1.84191	-0.544362	0.106783	27.035	1.99802e-07	1.94888e-06
Ywhab	1.84038	0.168674	0.0813524	6.04436	0.0139508	0.0396499
Cct5	1.83621	0.183235	0.0840554	5.84674	0.0156059	0.0436084
Polr1d	1.83552	0.343505	0.0841868	17.4737	2.91311e-05	0.000179213
Ssbp3	1.83548	-0.124194	0.0802971	3.3593	0.0668266	0.139978
Ndufv2	1.83508	0.276368	0.0821904	12.5081	0.000405197	0.00186663
Taf10	1.83443	0.376283	0.0873166	19.4494	1.03302e-05	7.03664e-05
Thoc7	1.8326	0.219142	0.0829224	7.50793	0.00614281	0.0198814
Adk	1.83138	0.0266061	0.0955464	0.324703	0.568795	0.61871
Angpt1	1.83057	-1.10423	0.122217	82.4962	1.05873e-19	5.30249e-18
Fras1	1.83053	-0.689948	0.133522	26.7709	2.29065e-07	2.20405e-06
Ube2d2a	1.82633	0.128901	0.0809917	3.3397	0.067627	0.141427
Luzp1	1.82598	-0.154076	0.0978776	2.68117	0.101541	0.193592
Rock1	1.82433	-0.086205	0.0852183	1.54772	0.213472	0.333571
Pigp	1.82191	0.437751	0.0834718	28.6092	8.85607e-08	9.17672e-07
Psmc6	1.82177	0.328541	0.0783528	18.5416	1.66233e-05	0.000108412
Tcea1	1.8207	-0.071513	0.0825904	1.6307	0.201606	0.31927
Hnrnpr	1.81978	0.219483	0.0846909	7.45178	0.00633739	0.0203723
Zfand6	1.81878	0.242227	0.0870276	8.60729	0.0033482	0.0118484
H2-DMb2	1.81465	-1.58614	0.121755	173.316	1.39608e-39	3.30533e-37
Cct2	1.81423	0.671624	0.0854815	64.8917	7.91294e-16	2.5547e-14
Lgals9	1.81226	-0.605841	0.0989225	37.9332	7.32106e-10	1.05729e-08
Cd47	1.8108	0.0461749	0.081882	0.893613	0.3445	0.458844
Dip2b	1.80584	0.109314	0.0930412	1.65938	0.197688	0.314633
Gstm1	1.80564	0.705102	0.120709	34.2077	4.95326e-09	6.34424e-08
Ube2e1	1.80428	0.339726	0.0808485	18.7501	1.49014e-05	9.83314e-05
AI646519	1.80311	-0.0615404	0.0898299	1.09815	0.294673	0.414931
S100a13	1.80309	0.108276	0.0923159	1.66565	0.196843	0.313793
Dipk1a	1.80061	-0.289731	0.0965498	9.15439	0.00248122	0.00911843
Psma6	1.79928	0.303141	0.0821619	14.6465	0.000129673	0.000680872
Cd2ap	1.79779	0.311361	0.0892124	13.1278	0.000290945	0.00139457
Taldo1	1.79731	0.0271039	0.090678	0.2923	0.588751	0.632551
Tpm3	1.79657	0.151626	0.0889311	3.93559	0.0472746	0.106381
Nfe2l1	1.79485	0.86071	0.090565	94.0826	3.02625e-22	1.90246e-20
Arl15	1.79376	-0.0498492	0.106726	0.337424	0.56132	0.614745
Tle4	1.79215	-0.371433	0.118741	9.8376	0.0017098	0.00663951
Pgam1	1.79199	0.185533	0.0920841	5.15208	0.0232186	0.060188
Rrbp1	1.7909	0.063185	0.0873248	1.17726	0.277914	0.399511
Zc3h15	1.79057	0.296499	0.0834815	13.6862	0.000216037	0.00107646
Cbx6	1.78939	0.424427	0.0894837	23.6064	1.18191e-06	9.89739e-06
Shisa2	1.78882	1.12199	0.14734	58.812	1.73477e-14	4.84063e-13
Lrp6	1.7886	0.216737	0.0939747	6.00894	0.0142336	0.0403801
Fhit	1.78751	-0.0795488	0.142221	0.340412	0.559592	0.613368
Strbp	1.78565	0.269646	0.103946	6.99561	0.00817097	0.0253332
Etv6	1.78477	-0.0491376	0.110018	0.602486	0.437631	0.528408
Hes1	1.78339	0.254346	0.150845	2.89093	0.0890794	0.175191
Eif3a	1.78197	0.389661	0.0861681	21.8785	2.90468e-06	2.27625e-05
Mrpl17	1.78154	0.484901	0.0916086	29.4411	5.7641e-08	6.0858e-07
Bex3	1.77992	-0.00572082	0.0920321	0.38283	0.536092	0.596311
mt-Nd4l	1.77916	-0.0968165	0.0955649	1.07579	0.299642	0.419412
Dapk1	1.77842	0.0736052	0.108943	0.585947	0.443991	0.532694
Mtarc2	1.77596	0.130699	0.0853658	2.63476	0.104548	0.198116
Ash1l	1.77528	-0.211467	0.0911853	5.79632	0.0160597	0.0446688
Ar	1.77527	-1.15743	0.115299	102.44	4.44602e-24	3.18686e-22
Kcnk2	1.77448	-1.13423	0.117839	94.6521	2.2696e-22	1.46549e-20
Vps28	1.77435	0.16488	0.0796699	4.71328	0.0299304	0.0733981
Zcchc7	1.77173	-0.30846	0.0998877	9.8192	0.00172699	0.00669627
Iscu	1.7709	0.0911385	0.0825955	1.63029	0.201663	0.31927
Dynlt3	1.76989	0.590923	0.0945115	41.1511	1.40905e-10	2.26988e-09
Cox16	1.76663	-0.0799037	0.0877765	1.2934	0.255423	0.375097
Qki	1.76613	-0.364033	0.0958346	15.0314	0.000105738	0.00056896
Glcci1	1.76367	1.12759	0.111409	105.454	9.71109e-25	7.74212e-23
Tmem131l	1.76206	-0.544968	0.119307	21.5859	3.38322e-06	2.61455e-05
Scaper	1.76081	-0.279765	0.0994959	8.13078	0.004352	0.0148676
Pkm	1.75701	-0.191763	0.0910999	5.31584	0.0211325	0.055808
Pdcd10	1.75659	0.268003	0.081186	11.9286	0.000552778	0.00247641
Rev3l	1.75557	0.642346	0.113527	32.8436	9.98793e-09	1.21741e-07
Kif13b	1.75529	0.453326	0.100249	20.7939	5.11458e-06	3.76628e-05
Mbd2	1.75347	-0.309101	0.0839913	14.2485	0.000160184	0.000824998
Isoc1	1.7533	0.190652	0.104815	3.53112	0.0602273	0.128567
Antxr1	1.75261	-0.692638	0.107487	41.8935	9.63825e-11	1.5988e-09
Arl3	1.75235	0.0652091	0.083994	1.26397	0.260901	0.381085
Tspo	1.7522	-0.303178	0.0993117	9.39216	0.00217915	0.00815018
Tinagl1	1.75149	1.08387	0.107616	105.318	1.04022e-24	8.20935e-23
Pak2	1.75068	0.39518	0.0899617	20.0378	7.59246e-06	5.33933e-05
Tulp4	1.74982	0.475701	0.0938246	27.0407	1.99215e-07	1.94559e-06
Bcl11a	1.74906	0.214718	0.0940287	5.56769	0.0182948	0.0495279
Ldhb	1.74888	-0.754504	0.101122	57.4267	3.50808e-14	9.38652e-13
Aff1	1.74604	-0.273079	0.101946	7.45137	0.00633881	0.0203723
Rnf7	1.74421	0.357499	0.0835048	19.4133	1.0527e-05	7.15818e-05
Nptn	1.74399	0.490926	0.0811802	38.6369	5.10452e-10	7.56767e-09
Picalm	1.74325	0.349116	0.0998042	12.7579	0.000354509	0.00165459
Trir	1.74302	0.506523	0.0815427	39.8004	2.81292e-10	4.30085e-09
Golgb1	1.73964	0.0612109	0.084223	1.08142	0.298381	0.418386
U2af1	1.73712	0.156757	0.0837354	3.83224	0.0502757	0.111568
Mllt10	1.736	0.0248212	0.0977109	0.478539	0.489085	0.563435
Tmed9	1.73542	0.00225919	0.0844842	0.788409	0.374582	0.484563
Sat1	1.73345	0.0571727	0.127535	0.306063	0.580106	0.626364
Ddx6	1.73281	0.291504	0.0872133	12.4879	0.000409599	0.00188469
Brk1	1.73146	0.183444	0.0851158	5.82983	0.0157567	0.0439197
G3bp2	1.73125	0.120155	0.0910889	2.60304	0.106659	0.200851
Nbea	1.73082	-0.558044	0.115399	23.7352	1.1054e-06	9.32664e-06
Hs2st1	1.7307	0.489531	0.0938248	28.6774	8.54962e-08	8.87094e-07
Rbm47	1.73053	0.154704	0.10026	2.78281	0.095281	0.184448
Ifnar2	1.72947	0.112089	0.0909755	1.61167	0.204257	0.322526
Cadm1	1.72707	0.148426	0.112847	1.87336	0.17109	0.285748
Mrpl23	1.72652	0.0377636	0.0856527	0.65781	0.417334	0.515746
Ifit3	1.72401	-1.87115	0.176601	109.031	1.59768e-25	1.37172e-23
Pabpn1	1.72394	0.122899	0.0835184	2.62557	0.105155	0.199025
Arhgap5	1.72304	-0.122111	0.0937828	2.08904	0.148359	0.257871
Unc119	1.72191	0.273265	0.101885	7.86585	0.00503771	0.0169071
Sypl	1.72141	0.179974	0.0851966	5.23158	0.0221803	0.0580358
Dctn3	1.72016	0.901788	0.0850638	117.585	2.13733e-27	2.16869e-25
Ift20	1.71976	0.392617	0.0833545	23.1821	1.47366e-06	1.22097e-05
Spag9	1.71779	-0.206433	0.0990181	4.89095	0.0269979	0.0679995
Ube2k	1.71722	0.0708038	0.0846791	2.2075	0.137341	0.24321
Rhob	1.71663	0.207173	0.115908	3.42736	0.0641245	0.135224
Pten	1.7159	-0.0821878	0.0880303	1.59915	0.206024	0.32466
Nop53	1.71348	-0.0434822	0.0835999	0.663068	0.415479	0.51479
Gtf2i	1.71075	-0.0616639	0.0874854	1.29443	0.255234	0.375097
Cct4	1.70954	-0.15696	0.0842834	4.4423	0.035059	0.0834093
Fkbp3	1.70933	0.123889	0.0836895	2.42768	0.119209	0.218583
Washc3	1.70922	-0.0202886	0.0888114	0.697984	0.403462	0.506629
Slc6a6	1.70777	1.17828	0.118897	99.7856	1.69816e-23	1.18462e-21
Pard3b	1.70516	-0.798204	0.132444	36.5733	1.47031e-09	2.05502e-08
Fbxl7	1.705	0.661529	0.172292	14.8547	0.00011612	0.000618436
Hadhb	1.70484	0.251362	0.087411	8.91218	0.00283275	0.0102369
Pdzd2	1.70433	0.603616	0.118286	26.5536	2.56333e-07	2.43641e-06
Zmynd8	1.70326	0.116852	0.0912253	1.9744	0.159982	0.271785
Dynll2	1.70215	0.585122	0.0889273	46.0409	1.15812e-11	2.19856e-10
Mtch1	1.70072	0.30116	0.0902753	12.0079	0.000529747	0.00238417
Usp9x	1.69757	-0.204975	0.102083	4.34477	0.0371227	0.0873697
Hnrnph3	1.69742	-0.03714	0.0800515	0.689812	0.406228	0.508449
Hdgf	1.69629	0.181302	0.0879607	5.01736	0.0250944	0.0641146
Mpc1	1.69615	0.343889	0.0851727	17.6344	2.67704e-05	0.000166792
Rflnb	1.69567	1.73389	0.127948	190.185	2.89672e-43	9.84002e-41
Ppp1r2	1.69372	0.751331	0.104222	54.2405	1.77397e-13	4.4e-12
Flna	1.69337	0.376781	0.105066	13.0678	0.000300416	0.00143557
Ube2m	1.69257	0.746882	0.0885992	74.7489	5.34564e-18	2.20981e-16
Timp3	1.6914	0.493253	0.136761	13.3883	0.000253204	0.00123953
Ikzf2	1.69118	0.0461933	0.113298	0.199781	0.654898	0.682593
Gpi1	1.69033	0.00309692	0.0885453	0.401933	0.526092	0.589976
Pgls	1.68936	0.0861297	0.0874296	1.40705	0.235547	0.355001
Rsu1	1.68922	-0.0974938	0.0857453	2.13512	0.143959	0.252131
Chd9	1.68821	-0.31233	0.0972509	10.7075	0.00106701	0.00441089
Hsd17b10	1.68687	-0.0865171	0.0902757	1.73497	0.187777	0.304252
Abi1	1.68666	0.101761	0.103528	1.39178	0.238105	0.357094
Pde4d	1.68612	-0.58547	0.128084	21.1797	4.18168e-06	3.15972e-05
Pnisr	1.68437	-0.17061	0.0891016	4.00282	0.0454242	0.103002
Dbi	1.6841	-0.540308	0.0978414	31.2664	2.24941e-08	2.55817e-07
Huwe1	1.67978	-0.0653187	0.0940468	1.06955	0.301047	0.420454
Pgrmc1	1.67846	0.256433	0.0896487	9.34613	0.00223457	0.00833747
Kctd1	1.67832	-0.289407	0.0931672	10.9912	0.000915456	0.00384128
Gtf2h5	1.67778	0.203131	0.0835282	6.98234	0.00823181	0.0254512
Uqcrc1	1.67424	0.452175	0.0843112	30.0726	4.16161e-08	4.50341e-07
Dpysl2	1.67395	0.0317258	0.131932	0.16661	0.683143	0.705538
Csnk2a1	1.67359	0.255191	0.0826328	10.4379	0.00123455	0.00500545
Jag2	1.67269	0.348025	0.0868683	16.7975	4.1587e-05	0.000246899
Mier1	1.67251	0.0976396	0.0967138	1.42458	0.232651	0.352063
Ryk	1.67039	0.148443	0.0858998	3.6074	0.0575228	0.124014
Ubxn4	1.66881	-0.0766934	0.0875676	1.27641	0.258567	0.37824
Zfp462	1.66872	0.355398	0.107415	11.4635	0.000709771	0.00308766
Ptp4a2	1.66825	0.168226	0.0866858	4.87183	0.0272986	0.06858
Cachd1	1.66823	-0.132003	0.114684	1.53158	0.215876	0.335983
Scp2	1.66814	0.14251	0.0864145	3.53924	0.0599328	0.128148
Cdk4	1.66801	0.123397	0.0934037	2.63123	0.104781	0.198413
Wac	1.66672	0.127979	0.0865274	3.10972	0.0778263	0.158101
ENSMUSG00000121482	1.66645	0.233962	0.0949825	6.41491	0.0113166	0.0334027
Col18a1	1.66486	-0.453478	0.100264	20.8909	4.86186e-06	3.60396e-05
Pard6g	1.66454	0.248945	0.0933231	8.09026	0.00445039	0.0151441
Sfpq	1.66445	0.123146	0.0880011	2.79623	0.0944859	0.183348
Ebf1	1.66425	1.84224	0.298464	37.0065	1.17739e-09	1.65448e-08
Csde1	1.66287	0.190113	0.0853334	6.09338	0.0135689	0.0387761
Stat3	1.66271	-0.479442	0.117067	16.9229	3.89289e-05	0.000232888
Lamtor2	1.66102	0.238321	0.0833969	8.65728	0.00325757	0.0115794
Cdc37	1.66079	0.124211	0.0831873	2.82395	0.0928675	0.180581
Txn2	1.65944	0.309127	0.0872561	13.5445	0.000232974	0.00115278
Mrpl3	1.65823	1.15456	0.13096	79.3928	5.09104e-19	2.35362e-17
Crip1	1.65743	-0.181874	0.120441	2.30898	0.128628	0.231934
Rcn1	1.65695	0.39263	0.0978694	17.2223	3.32509e-05	0.000201231
Ablim1	1.65575	-0.152138	0.101061	2.6611	0.10283	0.195572
Mbd5	1.65458	-0.318564	0.10362	9.77306	0.00177088	0.00682916
Psmd4	1.6545	0.277489	0.0878263	10.667	0.00109062	0.00449657
Dnajb6	1.65374	0.282502	0.0822442	12.8491	0.000337633	0.0015872
Hspa4	1.65335	0.393568	0.0980477	17.379	3.06196e-05	0.000186899
Btg1	1.65219	-0.126811	0.117956	1.35136	0.245041	0.364196
Dennd1a	1.65187	-0.443636	0.10293	19.2117	1.16997e-05	7.88696e-05
Map3k5	1.65159	0.196187	0.100917	4.39604	0.0360225	0.0854154
Ctsb	1.65084	-0.12122	0.0856896	2.45215	0.117364	0.215835
Gmpr	1.65022	0.313461	0.122287	6.81979	0.0090153	0.0275143
Psma1	1.64929	0.21823	0.086739	7.19673	0.00730367	0.0229638
Eif5b	1.64872	-0.0228618	0.0967946	0.463475	0.496004	0.568473
Pla2g7	1.64864	1.59487	0.140855	130.806	2.72973e-30	3.3853e-28
Polr2k	1.64745	0.0939881	0.0848279	1.74304	0.186754	0.30316
Tead1	1.64476	-0.166565	0.102208	3.04438	0.0810173	0.162973
Nsd3	1.64346	-0.061845	0.0972335	1.02889	0.310419	0.429105
Igfbp7	1.64303	-1.62491	0.200891	63.9754	1.25981e-15	4.0175e-14
Rac1	1.64205	0.250292	0.0833071	10.1416	0.00144957	0.00575483
Net1	1.64059	0.831021	0.104011	65.194	6.78755e-16	2.20046e-14
Atp2a2	1.6384	0.700053	0.102019	48.6668	3.0336e-12	6.33729e-11
Aff4	1.63724	0.312214	0.0883792	13.4517	0.000244779	0.00120264
Usp25	1.63704	-0.242989	0.0934551	7.57352	0.0059232	0.0193147
Rab18	1.63454	0.154428	0.0844771	4.34461	0.0371263	0.0873697
Socs3	1.63448	-1.29322	0.193601	43.7622	3.708e-11	6.46666e-10
Polr2f	1.63259	-0.14587	0.0843516	3.82444	0.0505102	0.111954
Ror1	1.63052	0.294855	0.135888	4.87894	0.0271863	0.0683457
Mt2	1.62995	-0.553643	0.164113	11.4214	0.000726021	0.00315134
Kdelr2	1.62975	0.523121	0.0900567	35.4848	2.57042e-09	3.43882e-08
Ube3a	1.62954	0.182409	0.0908014	4.8416	0.0277812	0.0694268
Twsg1	1.62728	0.00308167	0.0919514	0.943952	0.331263	0.446466
Fryl	1.62715	-0.044525	0.103093	0.490986	0.483488	0.559609
Clk1	1.62628	-0.221755	0.0984235	5.54574	0.0185258	0.050049
Pdap1	1.62558	0.255178	0.0909509	8.64682	0.00327632	0.0116248
Psmc3	1.62528	0.364482	0.0871933	18.4642	1.73122e-05	0.000112063
Irf2bp2	1.62369	-0.0884933	0.0907598	1.81111	0.178375	0.29386
Spry2	1.62283	0.798631	0.113295	50.6063	1.12881e-12	2.49135e-11
Vps13b	1.62217	-0.138521	0.114009	1.52678	0.216597	0.336614
Pttg1	1.62196	0.341944	0.0943034	13.3933	0.000252529	0.00123777
Nek7	1.62165	0.230842	0.091599	7.39184	0.00655206	0.0209886
Tuba1a	1.61861	0.564745	0.124127	21.0441	4.48835e-06	3.37512e-05
Sap18	1.61776	0.286373	0.084792	12.7682	0.000352557	0.00164646
Eno1	1.61723	-0.069594	0.0976723	0.93606	0.333293	0.44835
Tprgl	1.61499	0.329051	0.0915808	13.3809	0.000254197	0.00124283
Gna14	1.61362	0.61884	0.108411	33.7002	6.42926e-09	8.07614e-08
Susd6	1.61342	0.0563165	0.103125	0.67829	0.410176	0.511036
Zfand5	1.6126	0.487768	0.109156	20.6635	5.47512e-06	3.97926e-05
Prss16	1.6085	0.188244	0.189607	1.05759
Atrnl1	1.60797	-0.66116	0.11844	31.7021	1.79724e-08	2.07412e-07
Dctn2	1.60731	0.0652372	0.085894	1.69246	0.193278	0.309887
Ndufv3	1.60677	-0.182492	0.0858803	4.84125	0.0277867	0.0694268
Hnrnpab	1.60613	0.344836	0.0854657	17.8343	2.40994e-05	0.000152091
Utrn	1.60574	-0.127081	0.0991499	2.20712	0.137375	0.243215
Ly75	1.60438	0.402776	0.112593	13.7019	0.00021424	0.00106819
Hmgn3	1.60314	0.174551	0.0975262	3.5375	0.0599956	0.128213
Gpm6b	1.60231	-0.45016	0.123055	13.5954	0.00022674	0.00112764
Psmc5	1.60202	0.399673	0.0865938	22.5089	2.09174e-06	1.68308e-05
Cox20	1.60126	0.033282	0.0908514	0.986788	0.320529	0.438377
Hdlbp	1.60121	0.238706	0.0964575	7.28151	0.0069668	0.0220511
Timm8b	1.6012	0.516061	0.0905606	33.978	5.57395e-09	7.09271e-08
Stk39	1.59907	0.956194	0.109312	79.0347	6.10293e-19	2.78843e-17
Emp2	1.596	0.307528	0.107387	8.20277	0.00418265	0.0143707
Tsen34	1.59081	-0.0223777	0.0850679	0.464489	0.495534	0.568184
Bag3	1.59061	0.196302	0.166463	1.4702	0.225314	0.344766
Echs1	1.58889	-0.0089819	0.0906599	0.527054	0.467848	0.548432
Tra2a	1.58854	-0.0400908	0.1011	0.323633	0.569433	0.618944
Dpm3	1.58674	-0.147893	0.0880362	3.17067	0.0749718	0.15362
Tra2b	1.5866	-0.195858	0.0966303	4.6361	0.031306	0.0760881
Prmt1	1.58562	0.548399	0.093415	36.2943	1.69658e-09	2.35442e-08
Wasf2	1.58491	0.13722	0.0861079	2.94935	0.0859122	0.170623
Clec2d	1.58477	0.0798579	0.119363	0.504344	0.477597	0.555472
Ube2h	1.58409	0.177614	0.0950064	4.35353	0.0369324	0.0870098
Capza2	1.58348	0.5615	0.0874604	44.0599	3.18481e-11	5.59568e-10
Zmynd11	1.58325	0.137752	0.0909454	3.10016	0.0782846	0.158702
Ppp1ca	1.58288	0.053532	0.0855743	0.907467	0.340787	0.45553
Rrp1	1.58167	0.0142129	0.0901541	0.807229	0.368941	0.479384
Snrnp27	1.58127	0.727671	0.0912548	66.0828	4.32363e-16	1.44361e-14
Pum1	1.58069	-0.150932	0.0912512	3.56042	0.0591727	0.126801
Sdf4	1.58066	0.317772	0.0863067	14.1314	0.000170478	0.000870553
Cwc15	1.57903	0.454453	0.0879055	27.8808	1.29021e-07	1.29902e-06
Mrps14	1.5788	0.34401	0.0868595	16.452	4.98977e-05	0.000289636
Kcnh1	1.57664	0.213474	0.117397	3.45521	0.0630527	0.133324
Nktr	1.57413	0.127836	0.100422	1.92205	0.165631	0.278715
Gm4258	1.57411	0.634832	0.15648	16.5323	4.78294e-05	0.000278458
Thoc2	1.57359	0.0124403	0.0888859	0.686397	0.407393	0.509128
Fndc3b	1.57339	0.471943	0.0991475	23.883	1.0237e-06	8.70308e-06
Ostc	1.57258	0.215032	0.0932353	6.5579	0.010442	0.0311624
Gli3	1.57209	-0.366136	0.104006	13.1844	0.000282286	0.00135798
Tnks2	1.57146	0.379571	0.0977965	15.865	6.80252e-05	0.000380717
Kcnj15	1.5701	0.482665	0.109654	19.5896	9.59906e-06	6.59028e-05
Sri	1.56699	0.184157	0.0874644	4.93039	0.0263883	0.0666232
Higd2a	1.56685	0.384157	0.0869833	20.7279	5.29383e-06	3.86188e-05
Col4a1	1.56406	0.252557	0.0963038	7.34236	0.00673484	0.0214773
Tmem30a	1.5619	0.963652	0.0901926	120.054	6.15582e-28	6.41272e-26
Dnaja2	1.56159	0.299056	0.0844494	13.9288	0.000189867	0.000955817
Uqcc2	1.56075	-0.0702685	0.0890449	0.975196	0.323388	0.440563
Gadd45g	1.56066	-1.48307	0.205286	50.9735	9.36209e-13	2.09587e-11
Ociad1	1.55962	0.394574	0.0866016	22.1935	2.46506e-06	1.95727e-05
Phgdh	1.55876	-0.0177836	0.0992712	0.603575	0.437217	0.528217
Stub1	1.55713	0.244073	0.0859234	8.73152	0.00312755	0.011168
Khdrbs1	1.55672	0.109031	0.0912688	2.39729	0.121545	0.221765
Rin2	1.55609	-0.504783	0.105114	23.7729	1.08396e-06	9.15569e-06
Nudc	1.55582	-0.0842372	0.0832326	1.43054	0.231677	0.351201
Rab21	1.55557	0.594569	0.0928186	43.0567	5.31752e-11	8.99259e-10
Ndufs6	1.55452	0.0216105	0.0864999	0.858831	0.354066	0.466959
Vcl	1.55426	-0.488464	0.130062	14.4721	0.00014225	0.000742416
Pmp22	1.55418	-0.11419	0.116925	0.982713	0.32153	0.439214
Txnl1	1.55418	0.20712	0.0835269	7.16031	0.00745345	0.0233589
Mrpl14	1.55338	0.156623	0.0866035	4.05643	0.0440034	0.10035
Med28	1.55324	0.4015	0.0879928	21.3914	3.74442e-06	2.86534e-05
Jpt1	1.55264	-0.113899	0.101101	1.44993	0.228538	0.347726
Trappc4	1.55245	0.673281	0.0838813	66.951	2.78337e-16	9.57996e-15
Ewsr1	1.55213	0.198233	0.0839569	7.07829	0.00780233	0.0242964
Chmp4b	1.55134	0.22945	0.0869806	8.52682	0.00349951	0.0122995
Tbl1x	1.54905	-0.119403	0.0986149	2.12695	0.144728	0.25308
H2-Q7	1.54885	-1.37902	0.153104	80.5518	2.83186e-19	1.35738e-17
Tenm3	1.54841	-0.445815	0.149243	8.95712	0.00276391	0.0100253
Akirin2	1.5475	0.317111	0.0912261	13.0497	0.000303336	0.00144863
G3bp1	1.54613	0.251565	0.0870396	9.8248	0.00172175	0.00667926
Phb2	1.54456	0.0921217	0.08604	1.811	0.178388	0.29386
Fhod3	1.54364	0.48899	0.147709	11.0293	0.000896811	0.0037895
Ube2e2	1.54275	-0.670729	0.136842	24.1333	8.98934e-07	7.76922e-06
Ralgapa1	1.54249	-0.117244	0.100168	1.74714	0.186236	0.30276
Luc7l3	1.54004	0.0295046	0.0851547	0.727783	0.393603	0.499467
Ube2e3	1.5384	-0.419478	0.0866596	23.8199	1.05785e-06	8.95448e-06
Bcl7c	1.53689	-0.141871	0.0891353	2.80024	0.09425	0.182996
Jag1	1.53601	1.21736	0.106352	136.758	1.36214e-31	1.93499e-29
Mrps24	1.53538	0.00734063	0.0892671	0.776444	0.378231	0.487078
Ankrd17	1.53518	-0.322282	0.107468	9.59494	0.00195115	0.00741116
Nf1	1.53494	-0.0189222	0.108	0.266074	0.605978	0.645028
Trip12	1.53487	0.0630104	0.100098	1.14192	0.285248	0.406464
Sppl2a	1.53347	0.109895	0.0935103	2.38836	0.122242	0.22268
Tm9sf3	1.5333	0.379982	0.0872448	20.7305	5.28683e-06	3.86038e-05
Il11ra1	1.52993	0.239517	0.0876666	7.86786	0.00503213	0.0168956
Tst	1.52898	0.707554	0.120887	35.3839	2.7071e-09	3.61549e-08
Tnfrsf1a	1.52853	0.23707	0.0859188	7.79999	0.00522466	0.0174371
Rtn3	1.52804	0.218243	0.0865159	7.56146	0.00596297	0.0194281
Cuta	1.52801	0.0990069	0.0905257	1.63055	0.201627	0.31927
St3gal6	1.52671	0.723783	0.111809	43.4483	4.35299e-11	7.46707e-10
Zswim6	1.52661	-0.0331603	0.127552	0.327628	0.567059	0.617793
Klf9	1.52644	-0.337881	0.113334	9.12291	0.00252428	0.00925491
Ergic3	1.52613	0.076547	0.0825993	1.76755	0.183685	0.299647
Prpf4b	1.52473	-0.0141261	0.0953526	0.297915	0.585192	0.629767
Errfi1	1.52358	0.362672	0.126532	8.31636	0.00392896	0.0136068
Prpf40a	1.5214	0.394411	0.0902456	19.7735	8.71841e-06	6.03339e-05
Tcf25	1.52089	0.118076	0.0876287	2.6829	0.101431	0.193571
Cul1	1.52019	-0.0829033	0.0891801	1.49277	0.221788	0.341983
Asap1	1.52008	0.0699876	0.101133	1.0294	0.3103	0.429105
Sesn1	1.51937	-0.0566698	0.106852	0.565401	0.452092	0.53853
Man2a1	1.51908	-0.00961376	0.112572	0.660989	0.416211	0.515186
Uqcrfs1	1.51875	0.553186	0.0906015	38.7342	4.85618e-10	7.21319e-09
Rnf11	1.51845	0.641472	0.0900834	52.3296	4.69257e-13	1.08792e-11
Rab1a	1.5178	0.271229	0.0849257	11.6606	0.000638375	0.00281151
Hnrnph1	1.51554	0.0607003	0.0894821	1.69791	0.192562	0.309183
Tmem234	1.51534	0.267873	0.0887216	9.68798	0.00185477	0.00710074
Dnajc1	1.51523	-0.27959	0.103659	7.72071	0.00545908	0.0181035
Ndufb6	1.51464	0.254469	0.0879664	9.00545	0.00269175	0.00978171
Pcmtd1	1.51402	-0.0102945	0.0921244	0.5417	0.461729	0.545185
Ap2m1	1.51044	0.0699936	0.0854708	1.46529	0.22609	0.345548
Acsl3	1.5096	0.470758	0.10726	19.7564	8.7965e-06	6.08204e-05
Kmt2c	1.50663	-0.0347414	0.102507	0.688892	0.406542	0.508454
Use1	1.5037	-0.0667374	0.0882089	0.933904	0.33385	0.448764
Tbata	1.50322	-0.244141	0.178566	1.89338
Kirrel3	1.50302	-1.44228	0.247183	32.9299	9.55408e-09	1.16634e-07
Itgb4	1.50265	-0.0680336	0.100602	0.755606	0.384707	0.491853
H2-T22	1.50185	-0.719146	0.106109	46.394	9.6712e-12	1.86571e-10
Srpk2	1.50115	-0.123031	0.09854	2.31047	0.128505	0.231765
Zbtb38	1.50019	0.891488	0.0968827	87.5171	8.35534e-21	4.56506e-19
Psma5	1.49993	0.167025	0.0901297	4.78155	0.0287662	0.0711409
Nhs	1.4996	0.070548	0.14381	0.351336	0.553358	0.609442
Gm1673	1.49834	-0.158121	0.106688	2.87939	0.0897199	0.176082
Itgav	1.4979	0.399424	0.0982191	17.4957	2.87965e-05	0.000177575
Actr10	1.49777	0.413459	0.0859775	24.462	7.57906e-07	6.60147e-06
Rcn2	1.49689	0.635643	0.0940083	47.9801	4.30572e-12	8.80643e-11
Dhrs3	1.49559	0.288218	0.117262	6.57224	0.0103582	0.0309715
Chchd3	1.49434	0.0411109	0.0909677	0.742152	0.388972	0.495765
Cct8	1.49388	0.1284	0.0894546	3.20947	0.0732131	0.150887
Tmcc1	1.49361	-0.0625394	0.111769	0.490852	0.483548	0.559609
Fkbp8	1.49159	-0.0127994	0.0892162	0.405343	0.524343	0.589086
Btbd7	1.49012	-0.251655	0.0953187	7.5522	0.00599368	0.0195119
Ndufs3	1.4885	0.112017	0.0864389	2.40693	0.120799	0.220669
Ypel3	1.48844	0.321717	0.0926943	12.1215	0.000498443	0.00225889
Syf2	1.48705	0.174659	0.0845149	4.69882	0.0301833	0.0739254
Ctsd	1.48481	0.444698	0.097454	21.4633	3.60665e-06	2.7735e-05
Ubn2	1.48119	-0.204633	0.100336	4.45057	0.0348897	0.083133
Mdga1	1.481	0.674724	0.122493	30.9601	2.63394e-08	2.9525e-07
Eif4g3	1.47981	0.546816	0.0955637	34.4381	4.40023e-09	5.69188e-08
Dcxr	1.47942	0.358526	0.111004	11.0259	0.000898464	0.00379443
Sdhb	1.47837	0.399487	0.089162	21.0182	4.54933e-06	3.41691e-05
Tmem223	1.47773	0.314469	0.0961649	11.095	0.000865626	0.00367962
Pfdn2	1.47744	0.347524	0.0840694	17.7909	2.46555e-05	0.000154925
Ifi35	1.4773	-0.30158	0.094717	10.3524	0.00129309	0.00521846
Mien1	1.47592	0.688223	0.0959262	54.0832	1.92175e-13	4.70678e-12
Slc46a2	1.47553	-0.410425	0.172442	5.73728	0.0166085	0.0458201
Runx1	1.47492	-0.351806	0.11762	9.02527	0.00266272	0.00969424
Eda	1.47488	-0.650759	0.159489	16.7571	4.24832e-05	0.000251265
Purb	1.47439	0.585652	0.092897	41.8755	9.7276e-11	1.61021e-09
Exoc6b	1.46958	-0.43834	0.110232	16.2356	5.59326e-05	0.000320617
Tanc2	1.46867	-0.445519	0.132461	11.4092	0.000730826	0.00316867
Siva1	1.46833	-0.212098	0.10085	4.66418	0.0307981	0.0751251
Cdcp1	1.46803	0.528899	0.101095	28.0083	1.20796e-07	1.22251e-06
Spats2l	1.46721	0.223376	0.105924	4.79888	0.0284782	0.070635
Ppig	1.46325	-0.0502718	0.0916576	0.633515	0.426069	0.520625
Rbbp4	1.46296	0.460393	0.0885344	28.7385	8.28413e-08	8.62986e-07
Tcp1	1.46285	0.468955	0.0881056	29.8615	4.64027e-08	4.98e-07
Dusp1	1.46226	-0.667229	0.207104	10.3353	0.0013051	0.00525334
Bcas2	1.46138	0.224192	0.089939	7.11318	0.00765193	0.0239043
Arhgap32	1.46107	-0.190516	0.115346	3.10774	0.0779212	0.15817
Flnb	1.46007	0.342244	0.105122	11.3935	0.000737015	0.00319196
Zcrb1	1.45879	0.743275	0.0917453	67.8365	1.77626e-16	6.30815e-15
Actr3	1.45813	0.134651	0.0917867	3.27534	0.0703286	0.145936
Btbd9	1.45721	-0.128218	0.11629	1.39099	0.238238	0.357094
Timm13	1.45651	0.128379	0.0934007	2.7422	0.0977301	0.188207
Fundc2	1.45519	-0.0487892	0.0940867	0.671955	0.412371	0.512638
Csnk2b	1.45409	0.380828	0.0882573	19.4827	1.01513e-05	6.92682e-05
Rab6a	1.4535	0.696317	0.0945889	56.513	5.58268e-14	1.46367e-12
Ogt	1.45266	-0.117689	0.0948113	1.76742	0.183702	0.299647
Fbxo11	1.45102	-0.144643	0.106645	2.21638	0.136552	0.242419
Hadha	1.44914	-0.0623556	0.0891282	1.5381	0.2149	0.334978
Tshz2	1.44687	2.47623	0.191569	168.425	1.63351e-38	3.64645e-36
Usp18	1.4447	0.181615	0.108732	2.81855	0.0931803	0.181144
Kitl	1.44465	-0.380239	0.121552	10.2129	0.00139462	0.00556781
Tomm22	1.44409	0.590985	0.0926499	42.6241	6.63353e-11	1.11218e-09
Rapgef2	1.44332	-0.134233	0.109528	1.85809	0.172845	0.287511
Adh5	1.44259	0.0150877	0.0911871	0.488844	0.484444	0.560154
Slc1a3	1.44194	0.358881	0.10878	11.3879	0.000739239	0.00319805
Adam28	1.44039	0.64081	0.114472	31.7394	1.76313e-08	2.04079e-07
Nisch	1.43629	0.184934	0.0910721	5.26096	0.021809	0.0572558
Tox	1.43619	0.332254	0.141872	5.58799	0.0180841	0.0490763
Arhgdia	1.43449	0.229591	0.0887744	7.76254	0.00533408	0.0177417
Il6st	1.43442	-0.402118	0.101831	15.9081	6.64926e-05	0.000372673
Lama3	1.43347	0.424047	0.105822	16.652	4.49041e-05	0.000263193
Fstl1	1.43248	0.330475	0.103429	11.045	0.000889244	0.00376159
Dtnb	1.43238	0.0300369	0.10329	0.267815	0.604801	0.643962
Vkorc1	1.43093	0.200027	0.0957624	4.65408	0.0309799	0.0754314
Tmem254	1.43025	0.417574	0.097615	18.9369	1.3511e-05	8.99164e-05
Cisd1	1.42675	1.07189	0.105232	108.111	2.54201e-25	2.12546e-23
Cacybp	1.42611	0.19621	0.0947574	4.8989	0.0268739	0.0677308
Dpm1	1.42496	0.101399	0.0881739	1.96148	0.161355	0.273286
Pam16	1.42472	0.682676	0.0926218	57.0636	4.21949e-14	1.12132e-12
Taok1	1.42445	0.0415148	0.0943512	0.965803	0.325729	0.44212
Zfp280d	1.4244	0.26654	0.102903	6.94709	0.00839556	0.0259062
Fxr1	1.42367	0.380735	0.0914198	19.5146	9.98359e-06	6.8243e-05
Plgrkt	1.42219	0.188097	0.097146	5.13099	0.0235024	0.0607549
Calm3	1.42123	0.182142	0.0931983	4.48349	0.0342237	0.0819963
Birc6	1.42082	-0.0456148	0.0994658	0.712363	0.398661	0.503895
Rab7	1.41998	-0.00846896	0.0877999	1.08493	0.297597	0.417521
Cltb	1.41988	0.745526	0.0987503	58.5859	1.94607e-14	5.39172e-13
Celf2	1.41962	-0.776052	0.138807	31.5125	1.98163e-08	2.27349e-07
Nfic	1.41896	0.0506798	0.0938542	0.676964	0.410634	0.511362
Srsf10	1.41884	0.321246	0.0943286	12.5484	0.00039654	0.00183107
Degs1	1.41836	0.632241	0.0965516	44.4326	2.63267e-11	4.68544e-10
Llph	1.41715	0.0952577	0.0914127	1.57418	0.2096	0.329167
Mkln1	1.41701	0.223613	0.0981326	5.48703	0.0191581	0.0515789
Igf1r	1.41673	-0.385311	0.12091	10.3128	0.0013211	0.00530681
Smco4	1.41531	0.562484	0.10234	30.9035	2.71178e-08	3.03106e-07
C1qbp	1.41508	0.314818	0.0921684	12.2644	0.000461672	0.00210706
Eif5	1.41483	0.38377	0.0916863	18.3867	1.80314e-05	0.000116333
Stk26	1.41351	0.949793	0.102862	88.8711	4.21389e-21	2.36857e-19
Atp1b3	1.41321	0.779342	0.102123	60.1141	8.95139e-15	2.61937e-13
Naa20	1.41257	0.11548	0.0872986	2.84352	0.0917433	0.17884
Cenpx	1.41234	0.130691	0.0957946	2.49438	0.114253	0.211231
Pdia4	1.4122	0.333661	0.0963407	13.0439	0.000304271	0.00145221
Ubl3	1.41165	0.589743	0.0974538	38.1739	6.47114e-10	9.45028e-09
Hnrnpl	1.41058	0.321747	0.0921484	13.0266	0.000307102	0.00146393
Tbc1d5	1.41011	-0.299057	0.122804	6.11626	0.0133944	0.0384039
Sptssa	1.40947	-0.35231	0.0912536	15.6248	7.72349e-05	0.000427666
Cers6	1.40923	-0.109102	0.115342	1.24939	0.263669	0.38407
Tapbp	1.40881	-0.0460512	0.0905588	1.03517	0.308947	0.42798
Tagln2	1.40859	0.74554	0.127035	34.8341	3.59037e-09	4.71455e-08
Srp9	1.40839	0.43139	0.0915202	23.1731	1.48053e-06	1.22277e-05
Abi3bp	1.40715	2.0966	0.189602	122.382	1.90388e-28	2.03767e-26
Rab5if	1.40708	0.287482	0.100134	9.25873	0.00234375	0.00866881
Reps1	1.40675	-0.0243584	0.105111	0.638038	0.424422	0.519914
Cct6a	1.40663	0.358198	0.0942443	15.3552	8.90763e-05	0.000488388
Mrpl42	1.40656	-0.0206431	0.0892527	0.652415	0.419251	0.516902
Nckap1	1.40634	0.172948	0.0969702	3.71531	0.0539155	0.117896
Srp19	1.40622	0.439733	0.0903685	24.6952	6.71516e-07	5.88178e-06
Rp9	1.40414	0.0019201	0.092461	0.344403	0.557298	0.612057
Tsc22d3	1.40371	-0.67886	0.112454	37.1797	1.07731e-09	1.52759e-08
Rab12	1.40181	0.334873	0.0920955	14.5044	0.000139832	0.000730773
Xdh	1.40122	-0.609422	0.107097	33.0411	9.02316e-09	1.11547e-07
Rbm26	1.40066	-0.101625	0.0899396	1.95219	0.162351	0.274556
Ecpas	1.4001	-0.101987	0.106953	1.16288	0.280868	0.402633
Prelid1	1.39945	0.0125803	0.093069	0.47661	0.489962	0.563977
Lgr4	1.39808	0.418545	0.109298	15.2482	9.42676e-05	0.000512892
Vdac3	1.39722	0.102757	0.0969871	1.82035	0.177271	0.292577
Fubp1	1.39665	0.441654	0.0997342	20.3806	6.3471e-06	4.56209e-05
Ppdpf	1.39634	0.256986	0.0932506	8.2544	0.00406533	0.0140108
Wfdc2	1.39598	-0.0771553	0.132433	0.342727	0.558259	0.612681
Airn	1.39511	0.358216	0.132132	7.46736	0.00628278	0.0202255
Cmip	1.39494	0.330159	0.100874	12.0376	0.000521383	0.00234788
Ppp1r14b	1.39408	0.0995445	0.0986721	1.16502	0.280427	0.402161
Ubap2l	1.39407	-0.00227318	0.0925046	0.652661	0.419163	0.516875
Ube2n	1.39352	0.378327	0.0921562	18.5809	1.62846e-05	0.00010647
Hp1bp3	1.39345	0.266817	0.0931525	8.71079	0.00316332	0.0112802
Cdh3	1.39237	-0.253635	0.0988161	6.86005	0.00881442	0.0269855
U2surp	1.39226	-0.0148438	0.0920879	0.779204	0.377385	0.486552
Commd1	1.39106	0.0846169	0.0922036	1.90057	0.168015	0.281816
Tubb4b	1.38978	0.541683	0.120937	20.628	5.57733e-06	4.04602e-05
Etnk1	1.3875	0.143821	0.104034	2.56641	0.109155	0.204614
Mrpl33	1.38729	0.239148	0.0977959	6.44162	0.0111477	0.0330414
Mrpl48	1.38716	0.228922	0.0909968	6.93902	0.00843355	0.0259926
Fermt1	1.38711	0.196285	0.0963543	4.64795	0.0310907	0.0756498
Hnrnpm	1.385	0.0425333	0.0890936	1.54124	0.214433	0.33436
Ssr2	1.38462	0.411789	0.0906253	21.4465	3.63831e-06	2.79235e-05
Nr3c1	1.38456	0.172979	0.104276	3.32839	0.0680934	0.142108
Tmco1	1.38404	0.0666547	0.0922563	1.33964	0.247097	0.366801
Kcnq1ot1	1.383	-0.351059	0.128082	7.71435	0.00547835	0.0181597
Naa38	1.38226	0.182331	0.0950361	4.37806	0.0364044	0.0860338
Coa3	1.38217	0.0773987	0.0910017	1.42924	0.231889	0.351385
Tbl1xr1	1.38209	0.50545	0.104565	24.633	6.9355e-07	6.06119e-06
Spryd7	1.38072	0.764939	0.097458	64.0882	1.1897e-15	3.80947e-14
Pcnp	1.37924	0.28222	0.0872059	11.6874	0.00062925	0.00277445
Aamp	1.37849	0.27895	0.0872354	11.1158	0.000855971	0.0036485
Cdk2ap1	1.37831	0.5953	0.0946395	41.4966	1.18078e-10	1.92196e-09
Dock1	1.37732	-0.188076	0.104312	3.81195	0.050888	0.112599
Tubb2a	1.37603	0.0116393	0.116269	0.308371	0.578682	0.625085
Lman1	1.37507	0.813135	0.0963399	74.9522	4.82258e-18	2.01491e-16
Bax	1.37498	0.621502	0.0962608	43.2549	4.80542e-11	8.17968e-10
Atraid	1.37371	-0.0716624	0.0933699	1.22766	0.267863	0.388566
Itga1	1.37342	-0.330856	0.138365	5.77563	0.0162499	0.0450462
Pkn2	1.37166	-0.0212874	0.0984664	0.409899	0.522021	0.587642
Mbd3	1.37155	0.188119	0.0926871	5.16636	0.0230284	0.0597545
Gab1	1.37079	-0.0588048	0.120051	0.460313	0.497478	0.569577
Ndrg2	1.3698	1.37812	0.117983	142.693	6.86008e-33	1.09383e-30
Ascc3	1.36967	-0.294211	0.105016	8.45677	0.00363687	0.0126909
Cavin3	1.3687	-0.831564	0.140115	35.2304	2.92921e-09	3.88921e-08
Dek	1.36866	-0.311821	0.0948772	10.9598	0.000931096	0.00390062
Fkbp2	1.36839	-0.21081	0.0982737	4.76472	0.0290487	0.0716181
Cirbp	1.36703	0.0959042	0.0989686	1.1388	0.285906	0.406808
Slc29a1	1.36631	0.326341	0.116113	8.34931	0.00385833	0.0133919
Lsm4	1.36602	0.174542	0.0898385	4.02477	0.0448367	0.101893
Tob1	1.36556	0.436827	0.108026	16.8788	3.98434e-05	0.000237631
Mrpl20	1.36546	0.800175	0.0922209	79.1771	5.67845e-19	2.60975e-17
Pcm1	1.36437	-0.135688	0.102175	1.95752	0.161778	0.273765
Gm12216	1.3643	-0.136337	0.115312	1.69257	0.193263	0.309887
Mxd4	1.36382	-0.0775568	0.0979693	1.03197	0.309696	0.428591
Bbx	1.36242	-0.811821	0.108743	57.4711	3.42975e-14	9.24021e-13
Ppp2ca	1.36234	0.164058	0.0879266	4.48575	0.0341786	0.0819385
Cetn2	1.36147	0.395757	0.10011	16.7359	4.29605e-05	0.000253512
Gpatch8	1.36142	0.0372862	0.100446	0.413991	0.519951	0.586371
Akap13	1.36094	-0.00334547	0.117426	0.378065	0.538641	0.598347
Ddx24	1.36029	0.145571	0.0891556	3.33123	0.0679762	0.141929
Nherf1	1.36025	0.596321	0.106082	32.254	1.35277e-08	1.60161e-07
Ndufs8	1.35994	-0.0867251	0.0909919	1.83465	0.175579	0.290513
Xpr1	1.35987	0.204255	0.111791	3.85575	0.0495756	0.11032
Churc1	1.35969	0.152415	0.0929423	3.4	0.0651965	0.136947
Wwox	1.35918	-0.623688	0.15097	17.2434	3.2883e-05	0.000199159
Atp2b1	1.35795	0.00934839	0.110309	0.730397	0.392755	0.498877
Gm11808	1.35787	-0.0197246	0.103454	0.789915	0.374126	0.484429
Cpd	1.35712	0.499687	0.101985	24.7278	6.60239e-07	5.79601e-06
Wwtr1	1.357	-0.410608	0.118671	12.1151	0.000500147	0.00226368
Nrip1	1.35645	-0.0335098	0.118322	0.221742	0.637716	0.669238
Norad	1.35412	-0.0327151	0.0943704	0.656996	0.417623	0.515836
H1f2	1.35381	1.09214	0.172902	40.4806	1.98581e-10	3.1155e-09
Eif4h	1.35208	0.199824	0.0926381	6.101	0.0135105	0.0387084
Cryab	1.35092	1.36795	0.140579	96.747	7.87784e-23	5.17223e-21
Mat2b	1.35081	0.271341	0.0908112	9.58032	0.00196674	0.00745568
Man1a2	1.35058	-0.0571439	0.0987164	0.903345	0.341886	0.456452
Tut4	1.35041	-0.0826505	0.101279	1.1144	0.291128	0.411772
Zranb2	1.34885	0.246954	0.0925598	7.77559	0.00529568	0.017629
Capg	1.3486	0.742776	0.106563	49.8434	1.66521e-12	3.59399e-11
Rbbp6	1.34831	-0.0144809	0.0961954	0.424588	0.514656	0.582367
Nufip2	1.34751	0.219927	0.111028	4.5488	0.0329418	0.0794121
Ptpn14	1.3473	0.0749902	0.101955	1.26969	0.259824	0.379724
Tmem256	1.3471	0.192739	0.0976366	4.58736	0.0322086	0.0779572
Mtln	1.34601	0.123117	0.0963872	2.1128	0.146072	0.254859
Lars2	1.34566	0.11129	0.118801	0.897167	0.343542	0.457949
Cnot4	1.34558	-0.278245	0.102235	7.78621	0.00526466	0.0175556
Ephx1	1.34558	0.234539	0.0970319	5.97075	0.0145451	0.0411593
Vgll4	1.34497	0.461089	0.100995	21.7292	3.13969e-06	2.44327e-05
Smg6	1.34474	-0.292421	0.106391	7.91783	0.004895	0.0164776
Psip1	1.34424	0.0919552	0.101304	1.36952	0.241895	0.360741
Maf	1.34423	-0.502618	0.123429	17.1268	3.49646e-05	0.000210624
Pbrm1	1.34418	0.133377	0.100472	2.29656	0.129661	0.23342
Imp3	1.34388	0.352264	0.0937807	14.7017	0.000125935	0.000663474
Yy1	1.34304	0.125987	0.0915909	2.72282	0.0989233	0.190086
Fam162a	1.34239	0.267346	0.0992369	8.1072	0.00440897	0.0150228
Hypk	1.34229	0.430384	0.0944408	21.8687	2.91957e-06	2.28563e-05
Frmd4a	1.34167	0.490905	0.153778	10.6044	0.00112817	0.00463182
ENSMUSG00000121513	1.34125	0.0297362	0.125851	0.406918	0.523538	0.588716
Tbrg1	1.33994	0.0831821	0.0922486	1.71615	0.19019	0.306667
Nme1	1.33954	0.323719	0.102471	10.9746	0.000923672	0.00387159
Ebpl	1.33814	0.400859	0.0940804	18.8668	1.40172e-05	9.28892e-05
Emc7	1.33768	0.562088	0.0893106	41.8699	9.75512e-11	1.61135e-09
Gls	1.33728	-0.126603	0.126202	1.56282	0.211253	0.330898
Gm13629	1.33689	-0.805193	0.151658	28.3903	9.9162e-08	1.0221e-06
Hacd2	1.33685	0.995893	0.100272	103.715	2.33642e-24	1.78965e-22
Hectd1	1.33595	0.27503	0.0961089	8.95145	0.0027725	0.0100471
Ap2s1	1.33582	0.033186	0.0929769	0.956139	0.328162	0.444201
Ctnnd1	1.33429	-0.00641933	0.0989965	1.0993	0.294419	0.414841
Papola	1.33392	-0.0207276	0.0934578	0.756035	0.384572	0.491853
Nectin1	1.33282	-0.197577	0.104062	4.68058	0.0305054	0.0745507
Aurkaip1	1.3327	0.333949	0.0925681	14.0369	0.000179259	0.000908271
Urah	1.33132	0.202268	0.11957	2.87507	0.0899609	0.176466
Smc1a	1.33056	-0.188457	0.10271	3.55519	0.0593593	0.127096
Pnn	1.3305	0.012299	0.0952036	0.280745	0.596214	0.637675
Srsf9	1.33003	0.335851	0.0906479	14.9484	0.000110492	0.000591282
Thrb	1.3298	0.273664	0.159049	2.97912	0.084345	0.168008
Cldnd1	1.32944	0.717667	0.0945785	59.9008	9.97632e-15	2.84471e-13
Copg2	1.32774	0.281513	0.103956	8.21572	0.0041529	0.0142811
Cfl2	1.32774	0.0150321	0.0945031	1.17531	0.278313	0.399938
Mtpn	1.32758	0.541208	0.0953597	34.9426	3.39573e-09	4.49675e-08
Srp72	1.32688	0.288751	0.0961339	10.4159	0.00124936	0.00506028
Ifrd1	1.32598	-0.988768	0.151255	43.1467	5.07842e-11	8.62559e-10
Rtf1	1.32291	-0.174453	0.0947657	3.91883	0.0477481	0.107262
Adgrl2	1.32253	-0.513602	0.126629	16.681	4.42227e-05	0.000259588
Bnc2	1.32094	-1.07852	0.145401	55.5238	9.23339e-14	2.37304e-12
Chd4	1.32084	-0.0578614	0.0992038	0.582547	0.445316	0.533873
Prxl2c	1.32031	0.127232	0.0919505	2.87869	0.0897588	0.176114
Sv2b	1.31953	-0.405784	0.1473	7.64995	0.00567738	0.0186532
Sppl3	1.3189	-0.146504	0.0997633	2.77597	0.0956889	0.184962
Hnrnpd	1.31867	0.159956	0.0939469	3.86759	0.0492272	0.10967
Sec63	1.31639	-0.137781	0.0976535	2.62097	0.10546	0.199361
Nap1l1	1.31599	0.0515567	0.09597	0.90224	0.342182	0.456556
Lpcat2	1.31589	0.304613	0.103029	9.18374	0.00244175	0.00899029
Atp6v1a	1.31566	0.674306	0.0963449	51.3863	7.58669e-13	1.71811e-11
Iqgap1	1.31408	0.102243	0.0991047	2.20108	0.137914	0.243933
Commd3	1.31339	0.417788	0.099462	18.5382	1.66534e-05	0.000108427
Dctn6	1.31324	0.624749	0.0924209	47.2203	6.34389e-12	1.25799e-10
Cbx1	1.31201	0.225142	0.093975	6.28966	0.0121444	0.0354841
Ccni	1.31152	0.0687211	0.0956628	1.39348	0.237818	0.356909
3830406C13Rik	1.31141	0.647793	0.0962436	47.3015	6.08658e-12	1.21004e-10
Immp1l	1.31126	0.13457	0.0902236	3.10918	0.077852	0.158112
Kazn	1.31082	-0.850761	0.129603	44.0145	3.25947e-11	5.70992e-10
Tmem167	1.31074	0.373412	0.0953042	16.2844	5.45106e-05	0.000312696
Ddost	1.31068	0.331577	0.0924378	13.3084	0.000264221	0.0012846
Smim11	1.31059	-0.198697	0.0973971	4.81511	0.0282113	0.0701471
Eif1b	1.30962	-0.00339773	0.0944709	0.402556	0.525772	0.589701
Polr2m	1.30898	0.147403	0.0911406	3.73573	0.0532605	0.116823
Tbcb	1.30797	0.384816	0.094132	17.598	2.72875e-05	0.000169473
Lsm8	1.30789	1.60135	0.107199	245.982	1.95182e-55	1.52496e-52
Trafd1	1.30784	-0.253492	0.0939315	7.75168	0.00536625	0.0178335
Ufc1	1.30765	0.283441	0.0970594	9.32624	0.00225895	0.00840643
Fndc3a	1.30702	-0.00669888	0.107739	0.301196	0.583134	0.628568
Sec11a	1.30596	0.239221	0.0921318	7.74878	0.00537488	0.0178546
Irf9	1.30535	-0.230831	0.0973885	6.00373	0.0142757	0.0404849
Erh	1.30376	-0.133589	0.0970673	2.8552	0.0910787	0.178077
Fermt2	1.3026	0.151873	0.102415	2.69296	0.100792	0.192729
Tpi1	1.30242	-0.594087	0.106388	31.8058	1.70381e-08	1.97506e-07
Wdr33	1.30185	-0.10851	0.0971674	1.59953	0.205971	0.324658
Pts	1.30011	0.114224	0.0949578	2.48098	0.11523	0.212735
Robo1	1.29904	-0.9787	0.145182	45.5966	1.45296e-11	2.70929e-10
Ppa1	1.29831	0.872767	0.111941	63.3261	1.75165e-15	5.47425e-14
Diaph2	1.29826	-0.566123	0.131487	18.8897	1.38502e-05	9.19383e-05
Reep3	1.29802	0.432769	0.101719	18.5725	1.63563e-05	0.000106849
Tnrc6c	1.2979	-0.233672	0.0990646	5.89517	0.0151825	0.0426727
Rexo2	1.29718	0.470839	0.104927	20.8251	5.03183e-06	3.71234e-05
Hspa9	1.29661	0.138105	0.0969929	2.57965	0.108246	0.20325
Akap9	1.29621	0.405567	0.0993621	17.4809	2.90202e-05	0.000178758
Hnrnpdl	1.29615	-0.0465254	0.0958107	0.884816	0.346886	0.460844
Eif3g	1.29615	-0.0182909	0.0906265	0.426257	0.513831	0.581737
Mrps16	1.29578	-0.34808	0.0931525	14.6724	0.000127902	0.000672024
Tulp3	1.29551	0.411772	0.106889	15.6823	7.49213e-05	0.00041633
Sltm	1.29449	-0.0456239	0.104802	0.316063	0.573983	0.621987
Ntan1	1.29344	-0.301304	0.0935229	11.1884	0.000823094	0.00352761
Klf4	1.29277	-0.780638	0.184434	17.8536	2.38564e-05	0.000150923
Naxe	1.29262	0.0670773	0.0964398	0.871628	0.350505	0.463837
Zfp91	1.29203	0.278262	0.0978736	8.73369	0.00312384	0.0111598
Esyt2	1.28868	0.102743	0.106147	1.38507	0.239239	0.358011
Bod1l	1.2875	0.295549	0.0976176	9.55513	0.00199391	0.00754403
Ptprf	1.28634	0.303359	0.0941066	11.1241	0.000852128	0.0036341
Kif13a	1.28618	-0.196483	0.108395	3.60134	0.0577331	0.124364
Dnajc8	1.28578	0.389612	0.0961392	17.4694	2.91969e-05	0.000179336
Pdcd6	1.28574	-0.146802	0.0925354	2.97844	0.0843803	0.168008
Nudt14	1.28541	0.309138	0.0965461	10.6176	0.00112016	0.0046038
Hivep2	1.28537	-0.566433	0.125112	20.9446	4.72769e-06	3.52644e-05
Psmd8	1.28486	0.409726	0.0988036	18.6543	1.56692e-05	0.000102877
Acin1	1.28401	0.0101891	0.0993393	0.440404	0.506928	0.576799
Klf2	1.28317	-0.666915	0.182234	13.3533	0.000257963	0.00125888
6820431F20Rik	1.28244	-0.1652	0.0989592	3.71572	0.0539024	0.117896
Mllt3	1.28203	-0.380548	0.130519	8.70606	0.00317153	0.0113044
Wapl	1.28193	0.105353	0.10134	2.11182	0.146166	0.254966
Acadl	1.28025	0.00520156	0.0964045	0.461983	0.496699	0.568868
Rap1a	1.27958	-0.0487097	0.0946146	0.769658	0.380323	0.48836
Rex1bd	1.2794	0.203987	0.0970592	4.83094	0.0279534	0.0697095
Hprt	1.27931	0.0833591	0.0933408	2.14285	0.143235	0.251313
Mprip	1.27901	-0.121107	0.0984777	2.0155	0.1557	0.26689
Puf60	1.27885	0.295154	0.0994114	9.23329	0.00237654	0.00877086
Zmat2	1.27862	-0.128967	0.0965608	2.08367	0.148882	0.258381
Srpr	1.27784	0.838423	0.0982087	76.5639	2.13203e-18	9.15251e-17
Psmg4	1.27549	-0.388344	0.0985148	16.158	5.82713e-05	0.000332559
Ptprk	1.27536	-0.985078	0.128141	60.3969	7.75355e-15	2.28598e-13
Cycs	1.27518	0.900427	0.104564	77.5107	1.32007e-18	5.79422e-17
Gm2000	1.27454	0.0891013	0.102628	1.57289	0.209788	0.329395
Snx6	1.27447	-0.0354792	0.0950666	1.34122	0.246818	0.366544
Scx	1.27432	1.68844	0.151445	127.056	1.80563e-29	2.10558e-27
Krcc1	1.27293	0.270007	0.104939	6.9716	0.00828136	0.025574
Psmc2	1.27277	0.414642	0.092644	21.082	4.40035e-06	3.31533e-05
Rbm5	1.27174	0.00513635	0.0984016	0.465133	0.495235	0.568104
Saraf	1.27164	0.546051	0.0977048	32.9401	9.50413e-09	1.16206e-07
Plcb4	1.27127	0.354241	0.115292	9.94031	0.00161698	0.00632306
Mrpl24	1.27121	0.143439	0.091596	3.40847	0.0648627	0.136376
Sra1	1.27121	0.304856	0.0981546	10.0681	0.00150859	0.00595773
Cul3	1.27115	0.287776	0.100724	8.59039	0.00337942	0.0119418
Stag2	1.27046	-0.000460864	0.108147	0.482624	0.487236	0.561968
Atg3	1.26989	0.241016	0.0998934	6.67216	0.00979303	0.0294848
Dpy30	1.26936	0.515074	0.0953964	30.4728	3.38573e-08	3.71527e-07
Prss23	1.26822	1.03888	0.149785	48.4878	3.32344e-12	6.88754e-11
Clint1	1.26633	0.471713	0.097595	24.8918	6.06388e-07	5.3594e-06
Spred2	1.26613	0.236195	0.113766	4.69164	0.0303097	0.0741421
Rsf1	1.2652	0.0952192	0.106129	1.48538	0.222935	0.342877
Gtf2a2	1.26511	0.478586	0.0917708	28.0824	1.16261e-07	1.18583e-06
Psmd11	1.26443	0.167732	0.095789	4.08048	0.0433812	0.099217
Slc25a17	1.26404	0.915323	0.0995985	88.3988	5.3503e-21	2.96468e-19
Suclg1	1.26395	0.137544	0.0915791	3.45376	0.0631081	0.133405
Ppp1r11	1.26367	0.434689	0.0910941	24.0197	9.53535e-07	8.16883e-06
Ankrd6	1.26315	0.204331	0.125158	2.88412	0.0894571	0.175698
Acaa1a	1.26239	-0.00768891	0.0897087	0.978255	0.32263	0.439838
Nono	1.26223	-0.0571168	0.0924593	1.77509	0.182754	0.299215
Rnf187	1.26182	0.0284014	0.0998431	0.572269	0.449359	0.536662
Ube2l3	1.26158	0.151226	0.0937699	4.23481	0.0396032	0.0923089
Acpp	1.26089	0.923256	0.114087	67.673	1.92988e-16	6.79196e-15
Rapgef6	1.25884	-0.258823	0.112992	5.65689	0.017387	0.0474814
Kidins220	1.25832	0.070526	0.112772	1.15887	0.2817	0.403357
Rac3	1.2582	-0.043481	0.111778	0.336512	0.561849	0.614894
Mrpl51	1.25649	0.260333	0.0940876	8.77742	0.00304982	0.0109204
Swt1	1.25617	-0.534033	0.157792	11.7093
Bclaf1	1.25384	-0.141503	0.100721	2.54241	0.110826	0.206951
Nbeal1	1.25258	-0.070778	0.0965358	1.01768	0.313069	0.431319
Dctn1	1.25219	0.237139	0.110366	5.87741	0.0153363	0.0429934
Prpf19	1.25214	0.759366	0.10349	55.3298	1.0191e-13	2.60203e-12
Ptpra	1.25192	0.0445739	0.0972868	0.889451	0.345626	0.459795
Ddt	1.25103	0.202735	0.103601	4.19305	0.0405901	0.0942159
Vps29	1.25073	0.107433	0.0923978	2.24288	0.134231	0.239221
Mettl9	1.25072	0.345076	0.0978498	14.0176	0.000181103	0.000916422
Zfp148	1.25019	0.0451323	0.106622	0.788249	0.37463	0.484563
Sod2	1.2497	0.345036	0.101602	12.7905	0.000348381	0.00163184
Timm10b	1.24893	-0.015906	0.101398	0.625437	0.429034	0.522637
Zfp36l2	1.24789	-0.238269	0.117997	4.10665	0.042715	0.0979548
Trappc2l	1.24739	0.653765	0.097529	46.4237	9.5254e-12	1.84213e-10
Arl8a	1.24642	1.11206	0.101487	127.098	1.76848e-29	2.09351e-27
Cct3	1.24632	-0.310556	0.0927216	13.012	0.000309494	0.00147354
Ppp1r12b	1.24406	0.0322018	0.115323	0.503318	0.478046	0.555551
Med13	1.24375	-0.058349	0.116939	0.691691	0.40559	0.508095
Lsm7	1.24363	-0.0154766	0.0913684	0.393624	0.530401	0.59268
Fcho2	1.24318	-0.0257221	0.106357	0.543252	0.461088	0.54473
Arpc5	1.24266	0.448168	0.0976824	22.8091	1.78921e-06	1.45919e-05
Jup	1.24158	0.143783	0.0972704	2.80418	0.094019	0.182593
Ccl25	1.24149	-0.783084	0.189238	17.0589	3.62386e-05	0.000217962
Chchd1	1.24105	0.160191	0.0957533	3.40949	0.0648224	0.136328
Mapkap1	1.23921	0.0261462	0.103312	0.476394	0.49006	0.563977
Tns1	1.23908	-0.416387	0.107894	15.1915	9.71395e-05	0.000527049
Chd3	1.23901	0.367107	0.10031	14.0096	0.000181876	0.000919738
Cyc1	1.23852	0.516938	0.102968	26.1074	3.22948e-07	3.01457e-06
Rnf10	1.23822	0.167901	0.0950078	4.33741	0.0372836	0.0876608
Phkb	1.23821	0.0624463	0.108055	0.70562	0.400902	0.50569
Smoc2	1.23708	0.333304	0.155785	4.60697	0.0318423	0.0771422
Snw1	1.23627	0.0794833	0.097496	1.47814	0.224066	0.343784
Sys1	1.23611	0.166021	0.101015	3.12168	0.0772572	0.157352
Retreg1	1.23558	0.138567	0.102161	2.93964	0.0864297	0.171086
Kdm2a	1.23435	-0.0946792	0.104608	1.29818	0.254546	0.374673
Thra	1.23387	0.518967	0.102051	26.4577	2.69366e-07	2.55543e-06
Pan3	1.23333	0.044928	0.109045	0.582027	0.445519	0.533941
Klf3	1.23254	0.371968	0.102234	13.7031	0.000214096	0.00106816
Tle1	1.23191	-0.132108	0.104211	1.99086	0.158251	0.270018
Pum2	1.23186	0.0414788	0.0979018	0.967024	0.325424	0.442101
Spacdr	1.23158	0.525347	0.0992504	29.3475	6.04954e-08	6.36138e-07
Aqp3	1.23035	1.2656	0.248543	25.7621	3.86201e-07	3.53324e-06
Chrac1	1.23033	0.12135	0.101972	1.8725	0.171189	0.285852
Macroh2a1	1.23033	-0.119462	0.0968643	2.34623	0.125586	0.227658
Ssu72	1.23003	0.356389	0.0952939	14.631	0.000130745	0.00068558
Vezf1	1.2297	0.0734783	0.0982021	1.00332	0.31651	0.434297
Banf1	1.22864	0.358356	0.0977186	13.7578	0.000207955	0.00104017
Brd2	1.22716	0.161487	0.103342	2.92269	0.0873421	0.172427
Nop58	1.22662	0.0238683	0.115902	0.500754	0.479169	0.55636
Ythdc1	1.22659	-0.0511011	0.10556	0.576711	0.447605	0.535631
Lamtor1	1.2264	0.248477	0.0983365	7.29481	0.00691539	0.0219456
Sult5a1	1.22216	-0.302582	0.147978	4.22432	0.0398486	0.0928257
Hsdl2	1.22186	0.678447	0.103531	45.1261	1.8475e-11	3.38838e-10
Nqo1	1.22059	0.104641	0.138048	0.931355	0.334511	0.449297
Shisa5	1.22015	-0.210994	0.102319	4.37558	0.0364573	0.0861212
Alyref	1.21761	0.201244	0.100076	4.66262	0.0308261	0.0751698
Grpel1	1.21758	0.2109	0.0964428	5.1232	0.0236081	0.0609551
R3hdm2	1.2167	0.21537	0.0988363	5.63425	0.0176128	0.0480311
Tceal8	1.21605	0.00547317	0.101054	0.592934	0.441287	0.53108
Rsrc1	1.21505	-0.108996	0.109843	1.15131	0.283276	0.404684
Vps13a	1.21396	-0.162173	0.109999	2.62429	0.105239	0.199088
Sdf2	1.21346	0.413728	0.0957473	20.2116	6.93319e-06	4.92893e-05
Psmd12	1.2129	0.446002	0.0969655	22.5244	2.07493e-06	1.67301e-05
Phf14	1.21247	-0.0350589	0.102933	0.384727	0.535084	0.595614
Bzw1	1.21115	0.531922	0.105987	26.3067	2.91281e-07	2.7419e-06
Smarca5	1.21097	-0.183579	0.103318	3.89315	0.0484834	0.108508
Faf1	1.21071	-0.102746	0.104617	1.4994	0.220763	0.340901
Vti1b	1.20922	0.274517	0.0980848	8.48741	0.00357613	0.0125181
Rala	1.20886	0.403626	0.101356	16.5877	4.64507e-05	0.000270835
Mrpl18	1.20778	0.671783	0.101936	44.8816	2.0932e-11	3.8033e-10
Mcrip1	1.20742	0.196428	0.0989968	4.79425	0.0285549	0.0707577
Osbpl9	1.20686	-0.145564	0.106198	2.19908	0.138093	0.244099
Gm56730	1.20669	0.623804	0.108268	34.3882	4.5145e-09	5.80363e-08
Sbf2	1.20615	-0.116993	0.112264	1.36634	0.242441	0.361281
Ddx50	1.20599	-0.2087	0.0977397	4.96484	0.0258678	0.0657038
Zfyve21	1.20598	0.323712	0.107148	9.9868	0.00157666	0.00618706
Srek1	1.20464	-0.176587	0.102542	3.27176	0.070482	0.146068
Psmd1	1.20344	0.112871	0.0998283	1.54858	0.213345	0.333506
Rad51b	1.20332	2.35612	0.18862	160.555	8.55804e-37	1.71446e-34
Sugt1	1.20272	0.120255	0.101246	1.77016	0.183363	0.299595
Trip11	1.20258	0.50489	0.104715	24.463	7.57502e-07	6.60147e-06
Myo9a	1.20224	-0.279413	0.112109	6.34488	0.0117721	0.0345641
Rb1	1.20122	0.274495	0.112473	6.43971	0.0111597	0.0330517
Tanc1	1.2012	0.601066	0.116899	27.1461	1.88647e-07	1.86334e-06
Gmds	1.19947	-0.0842291	0.120001	0.653431	0.418889	0.5167
Eny2	1.19888	0.0986375	0.0997906	1.57902	0.208901	0.328333
Srgap3	1.19821	0.349089	0.11388	10.0675	0.00150907	0.00595773
Dlg2	1.19777	-0.462716	0.14951	9.94369	0.00161401	0.00631778
Klf6	1.19662	-0.514608	0.159785	10.4998	0.00119388	0.0048633
Irf2	1.19658	-0.0325937	0.0976122	0.902413	0.342135	0.456556
Wscd1	1.19596	0.502115	0.122066	17.563	2.77948e-05	0.000172077
Lamtor5	1.19559	0.23716	0.0960749	7.16152	0.00744841	0.0233525
Trpm7	1.19405	-0.331722	0.108682	9.92724	0.0016285	0.00635856
Gucy1a2	1.1932	-0.849037	0.15012	32.6824	1.08515e-08	1.3165e-07
Psat1	1.19294	0.0319018	0.109518	0.931158	0.334562	0.449297
Rraga	1.19201	0.21786	0.0960132	5.68175	0.0171422	0.0469413
Bag1	1.1901	0.15095	0.101194	2.58101	0.108153	0.203125
Il10rb	1.18959	0.301265	0.101391	9.40737	0.00216115	0.00809448
Patj	1.18857	-0.263323	0.109431	6.29208	0.0121279	0.0354622
Atp6v1d	1.18823	0.707338	0.0997706	52.6141	4.05958e-13	9.52477e-12
Zfp608	1.18744	0.13142	0.121213	1.40373	0.2361	0.355532
Actn1	1.18523	-0.253573	0.109415	5.94457	0.0147627	0.0416545
Atp8a1	1.18493	-0.275664	0.119232	5.67511	0.0172073	0.0470401
Eif4b	1.18487	-0.0274527	0.101935	0.655006	0.418329	0.516254
Tnrc18	1.18441	0.0713613	0.103361	1.06814	0.301366	0.420685
Bltp1	1.18419	-0.510561	0.11623	20.0032	7.73134e-06	5.40295e-05
Polr2i	1.183	0.0169714	0.101233	0.37122	0.54234	0.600951
Tiam1	1.18056	0.151988	0.113967	2.40829	0.120694	0.220529
Magoh	1.17986	-0.0533749	0.102499	1.05733	0.303824	0.422916
Timp2	1.17929	-0.348969	0.111588	9.90126	0.00165165	0.00644574
Atf7ip	1.17905	-0.132676	0.113368	1.61623	0.203618	0.321842
Lims1	1.1789	0.186866	0.107694	3.5988	0.0578212	0.124519
Pakap.1	1.1785	-0.0512216	0.136276	0.445817	0.504328	0.575145
Asah1	1.17811	0.21353	0.0990621	5.69999	0.016965	0.0466389
Snrpc	1.17779	0.12924	0.0955207	2.33147	0.126782	0.229294
Cast	1.17627	-0.0488222	0.106063	0.499392	0.479767	0.556839
Timm17a	1.17552	1.021	0.0988873	113.129	2.02165e-26	1.83665e-24
Bmpr2	1.17523	0.0578265	0.112955	1.02763	0.310715	0.429363
Xkr4	1.17436	3.26994	0.231951	205.674	1.20681e-46	4.96254e-44
Fam120a	1.17271	0.236371	0.0992217	6.48813	0.0108597	0.0322735
Ncoa2	1.17134	-0.434364	0.112388	15.6292	7.70551e-05	0.000426973
Zfp638	1.17049	0.0240101	0.105853	0.415772	0.519054	0.585867
Cops6	1.17046	0.380785	0.101642	14.468	0.000142562	0.000743549
Cltc	1.17043	-0.0370701	0.10208	1.23818	0.265822	0.386107
Atf7	1.1704	-0.0479111	0.117227	0.335635	0.56236	0.615366
Pdcl3	1.16962	0.649963	0.097005	46.188	1.07435e-11	2.05354e-10
Sdcbp	1.1692	0.117506	0.0936747	2.89076	0.0890888	0.175191
Cdk12	1.16918	-0.192657	0.106618	3.58217	0.0584029	0.125496
Ints6	1.16654	-0.299169	0.148391	4.14422	0.041777	0.0963127
Snx27	1.16607	0.536324	0.105895	26.7657	2.29675e-07	2.2072e-06
Ndufb4	1.16563	0.221791	0.10365	5.29056	0.0214413	0.0564466
Tap2	1.16546	-0.438627	0.101862	18.982	1.3196e-05	8.79695e-05
Cemip2	1.16516	0.748878	0.117628	41.8117	1.00501e-10	1.65657e-09
Sorl1	1.16474	0.370941	0.103806	13.2619	0.000270862	0.00131118
Ndufs2	1.16276	0.15761	0.100214	3.33561	0.0677951	0.141664
Egln2	1.16177	0.666128	0.103568	43.5078	4.22274e-11	7.27699e-10
Yipf4	1.16176	0.668091	0.0952319	51.5824	6.86557e-13	1.56844e-11
Serinc3	1.15999	0.269038	0.099306	7.95389	0.00479841	0.0161944
Kcmf1	1.15781	-0.0278386	0.10048	0.917414	0.338155	0.452941
Ier3ip1	1.15775	0.695833	0.0975958	52.9938	3.34603e-13	7.97028e-12
Cnot2	1.1575	0.115661	0.104309	1.93321	0.164407	0.277253
Raly	1.15694	0.0411608	0.0977082	1.06605	0.301839	0.42112
Phactr2	1.15666	0.258666	0.109654	6.36161	0.0116616	0.0342913
Polr2e	1.15659	0.0983757	0.0960534	1.75765	0.184918	0.301181
Wbp4	1.15656	0.323487	0.100273	11.4509	0.000714584	0.00310687
Ankhd1	1.15636	-0.0481314	0.108784	0.490241	0.48382	0.559764
Smg1	1.15553	-0.0913214	0.116203	0.915643	0.338622	0.45341
Trappc6b	1.15551	1.02912	0.0979532	117.333	2.42638e-27	2.39966e-25
Mrpl54	1.15544	0.324194	0.104535	10.697	0.0010731	0.0044337
Thrap3	1.15412	0.0419431	0.100911	1.30165	0.253912	0.374022
Gsta4	1.15352	0.117528	0.125661	1.11397	0.291221	0.411772
Zfp467	1.15096	0.776809	0.108165	52.949	3.42328e-13	8.12952e-12
Pycard	1.15071	0.255454	0.111383	5.75067	0.0164824	0.0455685
Ndufa10	1.15033	0.139424	0.0963381	2.6469	0.103752	0.196847
N4bp2l2	1.14971	-0.00627475	0.0966104	0.773074	0.379268	0.487773
Gpc4	1.14863	0.427262	0.124662	12.0508	0.000517706	0.00233401
Phlda1	1.14813	0.0921281	0.196205	0.262601	0.608339	0.646308
Fam3c	1.14744	1.5981	0.121575	187.245	1.26985e-42	3.96854e-40
Fnta	1.1469	0.221482	0.0991016	5.16201	0.0230861	0.0598844
Rap1b	1.1461	0.0864952	0.101463	2.21009	0.137111	0.243139
Arpc5l	1.14594	0.382709	0.0998023	16.3158	5.36136e-05	0.000308229
Wwc2	1.14539	-0.00605037	0.106455	0.412671	0.520617	0.58673
Cdk13	1.14524	0.00994208	0.110106	0.840627	0.359217	0.470506
Mcl1	1.14482	0.174736	0.110041	3.29187	0.0696235	0.144865
Chaserr	1.14459	0.133319	0.0995588	1.9367	0.164027	0.276731
Tsn	1.14399	0.0574296	0.0993317	1.09588	0.295171	0.415279
Copb2	1.1412	0.139232	0.10006	3.4745	0.0623215	0.132099
Ywhah	1.13979	0.132717	0.103689	2.17049	0.140682	0.247834
Rab5c	1.13955	0.107981	0.0954046	1.55739	0.212047	0.33181
Inpp1	1.13812	0.562091	0.103043	31.2819	2.23148e-08	2.54519e-07
Sobp	1.13771	0.755076	0.140369	29.3161	6.14837e-08	6.45661e-07
Caprin1	1.13764	0.0872523	0.102107	1.7714	0.183209	0.299595
Zfp644	1.13663	0.00734197	0.104859	0.322644	0.570023	0.619156
Lcor	1.1365	-0.0997268	0.111295	1.45914	0.227067	0.346431
Rbm6	1.13636	-0.192941	0.112896	3.33147	0.0679662	0.141929
Glod4	1.13621	0.0868473	0.103464	1.80349	0.179292	0.294844
Map2k2	1.13507	0.303044	0.0986063	10.0772	0.00150115	0.00593247
Gadd45b	1.13297	-0.322225	0.200066	2.60328	0.106643	0.200851
Arfgef1	1.13289	0.22949	0.112201	4.86162	0.0274605	0.0688318
Kif1b	1.13253	0.543732	0.109413	25.9678	3.47166e-07	3.20995e-06
Elavl1	1.13163	0.184646	0.102001	4.4649	0.0345982	0.0825895
P4ha1	1.13163	-0.0792614	0.128402	0.540039	0.462417	0.545585
Aig1	1.13032	-0.0566596	0.103467	0.755885	0.384619	0.491853
Snx9	1.12985	0.227772	0.104135	5.68866	0.0170749	0.0467928
Supt4a	1.12857	-0.163339	0.0955119	3.42093	0.0643749	0.13558
Scarb2	1.12692	-0.113548	0.105271	1.5125	0.218757	0.339252
Pa2g4	1.12678	0.128744	0.106024	2.53954	0.111027	0.207178
Fdx1	1.12509	0.433367	0.100055	19.5531	9.78437e-06	6.70573e-05
Sar1b	1.12473	0.528323	0.096794	30.8819	2.74215e-08	3.06063e-07
Zfas1	1.12421	-0.31585	0.114043	8.15118	0.00430331	0.014727
Rabgap1	1.12416	0.125225	0.107404	1.76883	0.183527	0.299595
Adss	1.12351	0.177487	0.105203	4.15966	0.0413977	0.0956075
Pawr	1.12343	-0.162413	0.127942	1.67984	0.194946	0.311666
Chd2	1.12305	-0.177039	0.121701	2.25383	0.133284	0.237968
Mpp7	1.12301	0.0658784	0.120142	0.533016	0.465342	0.547382
Plekha5	1.12236	-0.0509225	0.110827	0.591119	0.441987	0.531677
Rbm8a	1.12232	0.278278	0.0992434	8.74771	0.00309992	0.0110896
Lmna	1.12219	-0.224254	0.121834	3.6289	0.0567844	0.122675
Golim4	1.1214	-0.0986075	0.111108	1.42289	0.232929	0.352279
Nap1l4	1.12112	0.598305	0.102052	36.2306	1.75294e-09	2.41973e-08
Sipa1l1	1.12105	0.268483	0.120553	5.31028	0.0212	0.055939
Pkp4	1.12091	0.395669	0.112034	13.0281	0.000306851	0.00146363
Ramac	1.11964	0.123337	0.0982777	2.45859	0.116884	0.215126
Rbis	1.11907	-0.078224	0.0973731	0.843008	0.358538	0.470088
Derl1	1.11901	0.771096	0.101351	61.5281	4.36469e-15	1.31665e-13
Mylip	1.11878	0.728815	0.110666	44.6727	2.32876e-11	4.19049e-10
Smc3	1.11817	-0.0571253	0.103116	0.575306	0.448158	0.535801
Tmbim4	1.11789	0.480065	0.0966008	25.6842	4.02113e-07	3.6574e-06
Denr	1.11784	-0.0985703	0.102542	1.4812	0.223586	0.343468
Phf20l1	1.11628	-0.0461179	0.108933	0.755693	0.38468	0.491853
Smyd3	1.1155	-0.0789015	0.135159	0.633921	0.425921	0.520625
Pnkd	1.11529	0.119299	0.100709	2.26396	0.132415	0.237012
Pvt1	1.1145	-0.420087	0.129665	10.8572	0.000984145	0.00410087
Col4a2	1.11444	0.254213	0.112772	5.65213	0.0174342	0.0475772
Hibadh	1.11426	-0.0149946	0.0982827	0.884134	0.347072	0.460894
Map4	1.11346	-0.173917	0.11578	2.5705	0.108874	0.204184
Spr	1.11341	0.0644586	0.104994	1.05454	0.304464	0.423647
Slfn5	1.11239	-0.564516	0.127868	19.8821	8.23676e-06	5.72543e-05
Ppp2r2a	1.11238	-0.270847	0.099328	8.2765	0.00401614	0.0138596
Gpbp1	1.11167	0.0145724	0.101871	0.875552	0.349423	0.462876
Ilk	1.10935	0.827908	0.117835	51.3916	7.56616e-13	1.71811e-11
Snx2	1.10889	0.0916939	0.100474	1.24815	0.263907	0.384182
Vmp1	1.10842	0.258599	0.105078	7.17588	0.00738902	0.0231942
Tsg101	1.10825	0.762366	0.0998531	61.0949	5.43899e-15	1.62815e-13
Irgm1	1.10812	-0.564482	0.141798	16.0842	6.05867e-05	0.000344014
Pdlim5	1.10411	-0.356377	0.140755	6.60612	0.0101629	0.0304691
Ddx3x	1.10283	-0.206134	0.112469	3.72164	0.0537117	0.117549
Eprs	1.10112	0.338909	0.107362	10.9353	0.000943488	0.00394407
Bptf	1.10015	0.0790081	0.104341	1.42839	0.232027	0.351407
Mrps28	1.09996	0.305934	0.103259	9.83524	0.001712	0.00664474
Rgs10	1.09972	0.525572	0.116217	20.6647	5.47163e-06	3.97926e-05
Brd4	1.09874	-0.153936	0.104724	2.90784	0.0881498	0.173742
Igfbp3	1.09758	-0.0341288	0.199983	0.0357085	0.850119	0.853834
Tomm5	1.0971	-0.136493	0.0997925	2.98996	0.083782	0.167121
Csf1	1.09691	-0.422597	0.125498	11.3995	0.000734628	0.00318339
Napa	1.09485	0.0985487	0.10197	1.51669	0.218121	0.338467
Clpp	1.09471	0.273156	0.0994663	7.62057	0.00577062	0.0189118
Taf15	1.09277	-0.233698	0.108735	5.13091	0.0235034	0.0607549
Dmd	1.09261	-0.0250057	0.17939	0.06394	0.800374	0.807401
Esf1	1.09212	0.383391	0.10452	14.1013	0.000173221	0.00088053
Rgma	1.0915	0.280734	0.10751	7.12556	0.00759925	0.0237614
Tuba1c	1.09014	0.518176	0.125692	17.5893	2.74121e-05	0.000170041
Emg1	1.08991	0.11198	0.101324	1.53274	0.215701	0.335983
Acp1	1.08848	0.0917561	0.101914	1.37005	0.241803	0.360674
Dock7	1.0878	-0.348406	0.115683	9.69039	0.00185234	0.00709777
Rbm42	1.08751	0.194287	0.0985653	4.20017	0.0404199	0.0939046
Psmc4	1.0875	0.25183	0.0970345	7.80926	0.00519791	0.0173627
Ddx17	1.08727	0.0974568	0.108212	1.41605	0.234055	0.353435
Skic8	1.08719	0.187244	0.0987111	4.32493	0.0375579	0.0881996
Scaf11	1.08621	0.192627	0.105161	3.63922	0.0564332	0.122069
Apoc1	1.08614	-1.02889	0.348385	8.52995	0.00349349	0.0122949
Tnik	1.08409	0.0856718	0.136446	0.612564	0.433824	0.52585
Fnbp1l	1.08373	-0.176672	0.115404	2.70732	0.0998884	0.191342
Gm47283	1.08352	-0.273242	0.12801	4.77408	0.0288912	0.0713198
Aprt	1.08303	-0.245932	0.108957	5.18918	0.022728	0.059132
Hmgb2	1.08272	0.336418	0.124785	7.48882	0.00620831	0.0200436
Glis3	1.08263	1.00097	0.163762	37.9762	7.16121e-10	1.03804e-08
Zfp106	1.08244	0.198963	0.103693	4.39509	0.0360425	0.085437
Neo1	1.08235	-0.943396	0.125227	58.118	2.46859e-14	6.7674e-13
Chmp3	1.0815	0.0604075	0.103283	1.19135	0.275058	0.396866
Snhg1	1.08057	-0.226961	0.114127	4.30821	0.0379289	0.0889638
Sdhc	1.08047	-0.0755416	0.0980288	1.35837	0.24382	0.362851
Snrpa	1.07976	-0.0541383	0.105029	0.648568	0.420625	0.517905
Antkmt	1.07954	0.281695	0.100298	8.70278	0.00317725	0.0113196
Txndc9	1.07945	0.371055	0.102325	13.9632	0.000186424	0.000940912
C1d	1.07917	-0.0154619	0.100547	0.590198	0.442342	0.531859
Atg10	1.07914	-0.20308	0.117458	3.42613	0.0641723	0.135288
Higd1a	1.07863	0.0188933	0.112334	0.437205	0.508475	0.578015
Sh3bgrl	1.07859	0.13239	0.111239	2.34483	0.125699	0.227748
Psmd14	1.0783	0.251551	0.101947	7.27544	0.00699038	0.0221117
Med10	1.07819	-0.139049	0.102328	2.20814	0.137284	0.24321
Polr2a	1.07806	0.171571	0.126673	2.05329	0.151877	0.262178
Tasor	1.07781	0.0420857	0.118773	0.340867	0.559329	0.613274
Sc5d	1.07728	0.407004	0.113634	13.3908	0.000252858	0.00123861
Ggnbp2	1.07532	-0.0926807	0.106347	1.01426	0.313885	0.43208
Stard5	1.07527	0.884808	0.122875	53.6819	2.35719e-13	5.71948e-12
Trp53	1.07492	-0.0843664	0.104858	0.899439	0.342932	0.457302
Osmr	1.0738	-1.22775	0.149864	68.3443	1.37301e-16	4.92078e-15
Chmp2b	1.07327	0.0906029	0.10375	1.41564	0.234122	0.353467
Ccdc12	1.0728	0.134939	0.0983042	2.23487	0.134928	0.240229
Acbd6	1.07214	-0.0638143	0.102054	0.616844	0.432223	0.524616
Glo1	1.07207	0.029905	0.102366	0.689284	0.406408	0.508449
Grb2	1.07179	0.430481	0.100763	19.5268	9.9199e-06	6.78671e-05
Resf1	1.07162	-0.0405855	0.122633	0.262194	0.608617	0.646443
Rsbn1l	1.07152	0.150819	0.103202	2.53622	0.111261	0.207515
Sh3rf3	1.07131	-0.183102	0.131869	2.07098	0.150125	0.260072
Npepps	1.07026	-0.00268818	0.112977	0.808065	0.368693	0.479141
Eif2ak2	1.07013	-0.512684	0.113861	20.7474	5.24029e-06	3.84075e-05
Ier5	1.06971	0.148141	0.150255	1.03115	0.309888	0.428751
Smc6	1.06932	-0.184371	0.104382	3.50615	0.0611412	0.130127
Idh3b	1.06835	0.0158761	0.10145	0.665528	0.414615	0.514166
Creb3l2	1.06833	0.527927	0.113977	22.4765	2.12729e-06	1.70817e-05
Ambra1	1.06825	-0.279824	0.115386	6.08172	0.0136588	0.0389328
Dctn4	1.06672	0.0958078	0.102197	1.17453	0.278473	0.40002
Eif3d	1.06529	0.194707	0.0985405	4.37509	0.0364679	0.0861212
Tmem14c	1.0643	0.0865489	0.104712	1.02629	0.311032	0.429649
Crebrf	1.06398	0.0112158	0.107894	0.189421	0.663399	0.688789
Pfdn6	1.06391	0.0398604	0.0997545	0.62297	0.429946	0.523362
Irf7	1.06103	-1.24092	0.143211	76.5255	2.1739e-18	9.28123e-17
Brd1	1.06073	0.501908	0.100517	26.172	3.12323e-07	2.92237e-06
Zfp207	1.06033	0.131109	0.100623	2.49997	0.113849	0.210724
Naxd	1.0599	0.254131	0.100445	7.1858	0.00734827	0.0230848
Pgm5	1.05959	0.00270685	0.134971	0.111038	0.738966	0.753038
Serpinb5	1.05855	0.400597	0.125169	10.2692	0.00135269	0.00542535
Ppp2r1a	1.0573	0.0335136	0.0978381	0.844948	0.357986	0.469945
Mapk1	1.05661	0.193792	0.103712	4.86166	0.0274599	0.0688318
Gspt1	1.05642	0.141004	0.105516	3.0624	0.0801234	0.161508
Cdkn1b	1.05622	0.437505	0.106581	17.4215	2.99414e-05	0.000183476
Gng12	1.05604	-0.130899	0.111644	2.08393	0.148856	0.258381
Hdac2	1.05571	0.699615	0.100905	50.8067	1.01925e-12	2.26877e-11
Tm9sf2	1.05532	0.247564	0.101168	6.91291	0.00855754	0.0263125
Sec31a	1.05503	0.203951	0.10378	5.11868	0.0236696	0.0610455
Dbp	1.05497	1.11822	0.163295	47.4249	5.71527e-12	1.14203e-10
Adamts9	1.05491	0.328602	0.179674	3.45748	0.062966	0.133212
Wdfy3	1.05474	0.268356	0.117557	5.5485	0.0184965	0.0499874
Rabgap1l	1.05434	-1.05335	0.135063	62.4728	2.70155e-15	8.21294e-14
Mob4	1.05399	0.567594	0.0984521	34.7011	3.84415e-09	5.03088e-08
Ciao2b	1.05227	0.960188	0.108728	81.6539	1.62128e-19	7.86775e-18
Ttc14	1.0519	-0.190447	0.11146	2.94509	0.0861389	0.170943
Ccdc59	1.05006	0.232031	0.105618	5.36053	0.0205976	0.0547191
Copb1	1.04964	0.544047	0.10793	26.7559	2.30847e-07	2.21573e-06
Gsr	1.04955	0.785609	0.109625	54.1646	1.84375e-13	4.55861e-12
Zfp652	1.04871	-0.0955538	0.10739	1.06744	0.301525	0.420831
Tmem134	1.04801	0.499014	0.102952	24.168	8.82856e-07	7.64718e-06
Ube2g1	1.048	0.107661	0.115769	1.19834	0.273653	0.395277
Stx8	1.04763	0.0490503	0.103358	0.628869	0.427771	0.521725
BC005624	1.04523	0.108028	0.101918	1.70528	0.191598	0.308143
Mtus1	1.04503	0.154445	0.129232	1.72074	0.189598	0.305934
Cops4	1.04469	0.207504	0.100856	5.24336	0.0220306	0.0577214
Pdcd6ip	1.04449	0.0562065	0.10325	1.39503	0.237557	0.356723
Hadh	1.04385	0.224795	0.103463	5.88833	0.0152416	0.0427738
Lgals3bp	1.04382	-0.103989	0.111046	1.02229	0.311975	0.430571
Atad2b	1.04379	-0.0755511	0.114864	0.642932	0.422651	0.518999
Pacs1	1.04262	0.381978	0.125018	9.59488	0.0019512	0.00741116
Ssbp2	1.04243	-0.32614	0.124831	7.02774	0.00802564	0.024942
Actr2	1.04208	0.539059	0.105264	28.0169	1.20264e-07	1.22029e-06
Map2	1.0419	-0.03551	0.14113	0.180212	0.671191	0.695493
Tnrc6a	1.04116	-0.198004	0.112578	3.6222	0.0570136	0.123045
Agrn	1.04091	-0.236406	0.108567	5.04285	0.0247278	0.063406
Megf6	1.04054	-0.0832983	0.122337	0.759704	0.383421	0.491093
Cenpb	1.04044	-0.263307	0.10623	6.39108	0.0114695	0.0338156
Mia2	1.04038	0.256997	0.106605	7.11057	0.00766309	0.02392
Sec11c	1.04	0.635791	0.115751	31.1897	2.34008e-08	2.6387e-07
Ep400	1.039	-0.267474	0.125848	4.77746	0.0288347	0.0712259
Smarcb1	1.03856	0.142548	0.100346	3.08273	0.0791275	0.159895
Slc25a11	1.03828	0.852501	0.109216	63.5733	1.54509e-15	4.86766e-14
Eif3j1	1.03753	0.194569	0.101753	4.82713	0.0280153	0.0697969
Zfp407	1.03716	0.4225	0.125522	11.9051	0.000559791	0.00250209
Rwdd1	1.03637	-0.00142211	0.107055	0.540963	0.462034	0.54538
Stx7	1.03538	0.733305	0.10639	49.5448	1.93892e-12	4.11652e-11
9930021J03Rik	1.03509	-0.0613779	0.116481	0.484734	0.486286	0.561204
Trim44	1.03502	-0.0228578	0.114675	0.587973	0.443204	0.532446
Vwa1	1.03464	0.389094	0.122948	10.2589	0.00136023	0.0054528
Gatad1	1.03422	0.308906	0.102432	10.0825	0.00149688	0.00592157
Ifi44	1.03389	-1.60336	0.139123	140.83	1.75251e-32	2.63314e-30
Smarce1	1.03377	0.21313	0.103434	5.29698	0.0213625	0.0562728
Dusp11	1.03265	-0.0696266	0.109174	0.84863	0.35694	0.469466
Hdac1	1.03228	0.455624	0.10046	21.435	3.66037e-06	2.80377e-05
Samd5	1.03192	-0.465859	0.131211	13.3818	0.000254075	0.00124283
Dnajc19	1.03173	-0.0384568	0.103717	0.825816	0.363485	0.474473
Srgap2	1.0317	0.0795035	0.135115	0.376243	0.539621	0.598619
Tmed7	1.03167	0.684494	0.106958	43.0898	5.22845e-11	8.86115e-10
Rnf213	1.02974	-1.07282	0.128769	71.4652	2.82189e-17	1.07026e-15
Grhl2	1.02792	0.304279	0.113662	7.61025	0.00580374	0.0189965
Aebp2	1.02762	-0.045125	0.116211	0.88764	0.346118	0.460057
Kmt2a	1.02743	0.0412676	0.109702	0.864796	0.3524	0.465242
Bola3	1.0272	0.0719504	0.111166	0.572579	0.449236	0.536597
4632427E13Rik	1.02708	-0.0295711	0.116099	0.159494	0.689623	0.710352
Smim10l1	1.02644	-0.0219323	0.107499	0.698401	0.403322	0.506535
Lap3	1.02568	0.69155	0.122266	33.2289	8.19224e-09	1.01436e-07
Vta1	1.02555	0.641099	0.104509	38.8123	4.6657e-10	6.94344e-09
Yme1l1	1.02531	0.150739	0.103037	2.71462	0.0994325	0.190736
Rab5a	1.02525	0.284293	0.10866	7.74697	0.00538027	0.0178649
[truncated: 5,852 more rows]

## Sheet: TAC TEC_Proliferating TEC
GeneName	baseMean	log2FoldChange	lfcSE	stat	pvalue	padj
Vstm2l	0.0448582	17.8498	67.7805	14.7899
Gm36660	0.796232	7.20509	0.694044	241.402	1.94568e-54	2.06826e-50
Aqp5	0.121359	5.22951	1.0577	31.2862
Stc1	0.264454	4.17685	0.568164	60.0101
Ccl7	0.123048	4.08194	1.00434	15.6676
Ly6c1	0.199519	3.90706	0.830334	20.2956
Rarres1	0.248248	3.64123	0.728875	22.9416
F12	0.224216	3.57333	0.818914	17.4197	2.997e-05	0.000439423
Bcl2a1b	4.45751	3.55626	0.317174	106.454	5.86268e-25	1.41303e-21
Gm31683	0.146149	3.52686	0.924575	13.3306	0.000261107	0.00247157
Tspan8	0.0965627	3.49772	0.787183	21.6954	3.19564e-06	7.17801e-05
Spp1	0.856771	3.41134	1.10177	8.03532
Gstm1	0.873524	3.40518	0.373928	76.9045
Cyp1a2	0.0673376	3.28781	2.0923	2.18556	0.13931	0.226329
Rgs13	0.0887814	3.25636	1.19258	6.80036	0.00911395	0.0359536
Ly6c2	0.0630383	3.24592	1.18065	7.15664	0.00746871	0.0312445
Pou2af2	0.0842111	3.15401	1.00708	9.5921	0.00195417	0.0115984
Gm41555	0.289698	3.0556	0.622639	22.4615
Prrx1	0.0550988	3.04465	0.953559	10.513	0.00118535	0.00796479
Pir	0.0652907	3.00633	0.864631	12.8154	0.000343777	0.00305358
Gpr15lg	0.7298	2.94808	0.314319	85.3497	2.49997e-20	1.66092e-17
Gsta4	0.15992	2.88476	0.720353	15.2097	9.62081e-05	0.00111454
Irag2	0.0401644	2.87646	1.13512	6.70854	0.00959522	0.0371846
Cck	0.345854	2.86484	0.846257	10.3596
Efhd1	0.0301875	2.85547	1.15424	6.81216	0.00905394	0.0357679
Gstm2	0.123311	2.78484	0.532414	30.3315	3.64172e-08	1.77575e-06
Ccl11	0.691975	2.76118	0.645674	16.3741
Dapl1	0.464468	2.59904	0.411174	37.7827	7.9082e-10	6.56751e-08
Ackr3	0.0526547	2.59763	0.78722	12.2049	0.000476629	0.00393367
ENSMUSG00000079808	0.0571409	2.51675	0.951973	7.02022	0.00805943	0.0329887
Krt25	0.0892592	2.46843	0.550096	22.6566	1.9369e-06	4.86889e-05
Gm10457	0.0575293	2.46005	1.71939	1.9118
Krt19	0.154106	2.44506	0.607108	16.2744	5.47985e-05	0.000708647
Ces1b	0.0792999	2.43088	0.886474	7.30704	0.0068685	0.0294523
Cfap58	0.17033	2.4237	0.377989	47.4289	5.70354e-12	8.08381e-10
Epyc	0.139242	2.41603	0.480309	26.6126	2.48619e-07	8.80939e-06
Ddit4l	0.19778	2.40023	0.555883	18.097
Sema3d	0.200862	2.34802	0.657202	12.1472
C430049B03Rik	0.0843314	2.34484	0.664737	12.8778	0.000332502	0.0029928
Tm4sf1	0.0412731	2.29175	1.05979	4.61669	0.0316623	0.0863055
Bpifa1	0.602506	2.28222	0.55618	15.6324
Lypd8l	0.348738	2.25404	1.23744	3.05026
Pmp22	0.048887	2.24707	0.817163	7.94063	0.0048337	0.0227355
Skint3	0.486977	2.21678	0.305374	52.4288	4.46141e-13	8.46872e-11
Tshz2	0.390738	2.19922	0.33667	42.6771	6.45638e-11	7.07539e-09
Rtl4	0.0909655	2.1895	1.22415	3.06477
Foxa1	0.129748	2.18794	0.393185	35.8395	2.14259e-09	1.50833e-07
Slc5a8	0.130666	2.17922	0.500358	19.6727	9.19074e-06	0.000170502
Notch3	0.110493	2.16994	0.479652	22.2571	2.38479e-06	5.78774e-05
Selenom	0.912153	2.10137	0.224346	87.9667	6.65657e-21	5.89661e-18
Drc7	0.115849	2.09913	0.453508	23.667	1.14533e-06	3.08223e-05
Pou3f1	0.473599	2.09459	0.288817	53.1029	3.16518e-13	6.52917e-11
Mtus1	0.0817476	2.07412	0.677625	9.54238	0.00200781	0.0118178
Zeb2	0.261845	2.07219	0.421094	23.9811	9.72841e-07	2.70715e-05
Ovol3	0.166993	2.05598	1.44102	1.90174	0.167883	0.256338
Fbn2	0.151221	2.03994	0.530525	14.734	0.000123792	0.00136647
Cdhr17	0.209469	2.03655	0.501626	16.5402	4.76284e-05	0.000635245
Aldh1a7	0.0387337	2.02846	1.3121	2.34764	0.125473	0.211216
Irx3	0.14841	1.93397	0.401227	24.5265	7.32961e-07	2.16427e-05
Csf2	0.135295	1.89917	1.02388	3.33236
Mia	0.328204	1.88231	0.484373	14.4751	0.000142022	0.00152494
Serpinb5	0.169635	1.88033	0.344637	32.131	1.44116e-08	7.77976e-07
Fstl4	0.256291	1.88006	1.02853	3.16107
Bcl2a1d	7.18036	1.86772	0.183011	98.9271	2.61965e-23	3.09409e-20
Ccl1	0.137857	1.82017	1.40887	1.58909
C920021L13Rik	0.29286	1.81496	0.392444	21.3964
Rarres2	0.0786789	1.78059	0.860255	4.17508
Nefh	0.219623	1.76296	0.395331	20.3835
Tmem54	0.177668	1.75658	0.32258	32.749	1.04858e-08	6.05785e-07
Cxcl14	0.0937709	1.75613	1.09479	2.46548
Ttc6	0.150436	1.74152	0.328788	31.2736	2.24112e-08	1.13986e-06
Crabp2	0.146979	1.73986	0.529187	10.8593	0.000983011	0.00691099
Bcl2a1a	0.0726754	1.73723	0.635555	7.59408	0.00585602	0.0262213
Nebl	0.247523	1.71072	0.398065	18.4319	1.76086e-05	0.000287968
Ifit3	0.135886	1.68276	0.801237	4.26115
Gm20559	0.155885	1.66529	0.430307	15.2535	9.40001e-05	0.00109564
Gcnt1	0.0551666	1.66433	0.664166	6.56928	0.0103754	0.0392913
Lce3b	0.147419	1.66426	1.68035	0.935567
Plcl1	0.045048	1.6592	0.982273	2.89594	0.0888031	0.169414
Cdh8	0.111179	1.64231	0.796629	4.17957
Gcnt2	0.120057	1.62675	0.438443	14.3296	0.000153436	0.00162291
Cdkn2a	1.84025	1.62077	0.135444	147.019	7.77103e-34	4.1303e-30
Pgf	0.165873	1.61986	0.454147	12.79	0.000348476	0.00306904
Serping1	0.0611999	1.6109	0.860471	3.47674	0.0622374	0.134855
Ly6k	0.0982191	1.61073	0.497198	10.9403	0.000940929	0.00669233
Mlph	0.109101	1.60475	0.397248	17.463	2.92951e-05	0.000432509
Fxyd1	0.0761034	1.59739	1.14384	1.90988
Dcn	0.756552	1.59719	0.283171	31.0973	2.45417e-08	1.22478e-06
Gm50115	0.137068	1.58985	1.89904	0.669025
Ets1	0.0857589	1.58554	0.476554	11.7551	0.000606782	0.00473738
Parp16	0.234779	1.5827	0.436349	13.2617
Psors1c2	0.194187	1.57505	0.45301	12.2357	0.00046883	0.0038843
Alpk3	0.0441982	1.54807	0.728849	4.81689	0.0281821	0.0793159
Nr2f2	0.122044	1.54542	0.46631	11.3033	0.000773712	0.0057314
S100a9	0.271457	1.54212	0.522317	8.44274
Dmkn	0.174673	1.54207	0.481894	10.0535	0.00152056	0.00961977
Gdf15	0.639834	1.53375	0.431583	12.2995
Dcc	0.248704	1.52973	0.451792	11.311	0.000770503	0.00571958
Tnfaip6	0.0554866	1.51829	0.935156	2.59335	0.107313	0.191366
Dnah2	0.146225	1.51124	0.524987	8.34507	0.00386735	0.0191923
Ifitm1	0.258564	1.50989	0.383662	15.7825
Jdp2	0.0832499	1.50947	0.459448	11.3803	0.00074227	0.00554403
Caly	0.0481042	1.50822	1.15409	1.69456	0.193001	0.281272
Adam28	0.0776367	1.49363	0.495488	9.43337	0.00213073	0.0123439
Asic2	0.0723823	1.49307	0.685776	4.77166	0.028932	0.0808057
Serpina9	0.203309	1.4843	0.491287	9.00353	0.00269459	0.0147419
Cx3cl1	0.0966908	1.48424	0.516464	8.50604	0.00353969	0.0180033
Gm20633	0.0729048	1.47676	0.495715	9.45568	0.00210497	0.0122442
Angptl7	0.228443	1.46989	1.30635	1.22316
Cited1	0.0477641	1.46228	0.614015	6.17895	0.0129279	0.0458536
Hepacam2	0.0485642	1.46148	0.732001	4.17447	0.0410373	0.102595
F3	0.073972	1.44513	0.547477	7.20253	0.00728008	0.0307234
Atp1b1	1.34908	1.43611	0.160521	80.7194	2.6016e-19	1.62676e-16
Plekha6	0.142663	1.43083	0.359441	16.455	4.98196e-05	0.00065705
Col3a1	0.109745	1.42816	1.02267	1.9015
Gsta2	0.263413	1.42612	0.396754	12.8331	0.000340543	0.00303689
Kcnk1	0.15812	1.41781	0.444426	10.2028
Hgf	0.329732	1.37456	0.28004	24.766	6.47298e-07	1.97518e-05
Apcdd1	0.0723986	1.35326	0.61261	4.88113	0.0271519	0.0772757
Itln1	0.161731	1.35177	0.40221	11.7855	0.000596931	0.00468294
Susd4	0.174789	1.33041	0.571618	5.48241	0.0192087	0.060861
Fam81a	0.112705	1.32489	0.370381	13.999	0.000182912	0.00185353
Serpinb12	0.106531	1.31911	0.811344	2.55468	0.109968	0.194472
Ptn	0.447916	1.31048	0.359612	13.1093	0.000293838	0.00272901
C130026I21Rik	0.156504	1.30879	0.345291	14.906	0.000113003	0.00127114
Col26a1	0.0660208	1.29552	0.704099	3.44835	0.063315	0.136353
Fyb2	0.193607	1.28791	0.284366	21.6923	3.20073e-06	7.17801e-05
Hopx	0.18249	1.28088	0.447727	8.36722
Apoc1	0.354091	1.2808	0.28708	19.9803	7.82461e-06	0.000152058
Serpinb8	0.062919	1.28009	0.794867	2.61642	0.105763	0.189716
Tnfrsf12a	0.212286	1.27936	0.314335	17.2403	3.29377e-05	0.000475071
Klk14	0.110269	1.27323	1.3041	0.933923
Tspan15	0.137542	1.26602	0.348578	14.1408	0.000169623	0.00175145
Scara3	0.147922	1.26516	0.3047	18.6471	1.57285e-05	0.000262059
Gm29461	1.35594	1.24867	0.227816	29.9198	4.50303e-08	2.15618e-06
Or8b40	0.0495917	1.24848	0.959644	1.73245	0.188099	0.277053
Pxdc1	0.0851434	1.23495	0.737776	2.82929
Isg15	1.36726	1.23019	0.267753	20.6191
1500015L24Rik	0.101794	1.21565	0.724899	2.83699
Ptprm	0.166733	1.20159	0.334459	13.3068	0.000264443	0.00249426
Boc	0.258396	1.19377	0.324856	13.533	0.000234403	0.00228387
Iapp	0.25086	1.19123	0.851434	1.9334
Cyp2f2	0.27516	1.18899	0.479303	6.04484	0.013947	0.0486726
Mpo	0.0767039	1.18668	0.912587	1.66641	0.19674	0.284383
Gas1	0.309351	1.18541	0.363463	10.4924	0.00119869	0.00803827
Cyp27a1	0.250739	1.18476	0.255031	23.2243	1.44165e-06	3.79324e-05
Art3	0.810366	1.17795	0.1567	58.1716	2.40217e-14	6.71974e-12
Ceacam15	0.0769179	1.17674	1.25923	0.846865	0.357441	0.428663
Lin7a	0.0601726	1.17642	0.854246	1.8826	0.170038	0.258511
Mylpf	0.20321	1.17012	0.270508	19.7574	8.792e-06	0.000166891
Scn8a	0.147597	1.16999	0.34311	12.0004	0.000531888	0.00427267
E230001N04Rik	0.0928447	1.16987	0.409691	8.60534	0.00335179	0.0173257
Mef2c	0.15168	1.16868	0.423641	7.68694	0.00556218	0.0252496
Bmpr1b	0.132842	1.16652	0.589052	3.92707	0.0475146	0.112691
H2-Q10	0.0643229	1.16456	0.585909	4.14046	0.0418699	0.103966
Gm21060	0.371516	1.16335	0.227692	27.6655	1.4421e-07	5.61521e-06
Troap	0.204775	1.16277	0.277475	18.6202	1.59522e-05	0.00026537
BB123696	0.21996	1.16194	0.36575	10.4821	0.00120535	0.00806856
Rnf122	0.131363	1.16124	0.349127	11.4412	0.000718352	0.00538131
Tfap2c	0.363728	1.15998	0.20803	32.4978	1.1933e-08	6.61093e-07
Fgfbp3	0.112536	1.15991	0.462192	6.42218
Pla2g3	0.108061	1.15918	0.549497	4.54111	0.0330901	0.08905
Tdo2	0.120784	1.1587	1.64566	0.487229
Rarb	0.140975	1.15272	0.466077	6.12931	0.0132959	0.0468153
Spink5	0.0555851	1.14792	0.906275	1.61838
Cybb	0.112416	1.13952	0.491481	5.4643	0.0194088	0.061365
Ube2c	3.79312	1.13362	0.176457	40.881	1.61788e-10	1.59242e-08
Ddias	0.169788	1.12961	0.304512	15.4584	8.43396e-05	0.00100059
Rsad2	0.0679328	1.12945	0.618	3.33847	0.0676774	0.142321
Mgll	0.674796	1.12869	0.227805	24.8294	6.26345e-07	1.94112e-05
Mllt3	0.203447	1.12458	0.371757	9.19556	0.00242603	0.0135908
Hoxc11	0.0330968	1.12235	1.18698	0.917221	0.338206	0.412616
Bmp6	0.444099	1.12007	0.244052	21.474	3.58664e-06	7.9429e-05
Rmst	0.0901968	1.11739	0.625941	3.17884	0.0745975	0.151199
Filip1	0.135875	1.11391	0.494462	5.09415	0.0240066	0.0712226
Adgrg6	0.0816075	1.10992	0.555079	4.09647	0.0429728	0.105839
Slc28a2	0.0708454	1.1087	0.522986	4.68902	0.0303559	0.0837269
Il7r	0.0628128	1.10852	0.563704	3.92131	0.0476778	0.112977
Pxmp2	0.156905	1.0999	0.357988	9.7122	0.00183049	0.0110244
Sema3a	0.179209	1.09953	0.377151	8.6031	0.00335591	0.0173257
Fam83d	0.211772	1.09207	0.338583	10.5464	0.00116416	0.00786214
A230020J21Rik	0.15162	1.08587	0.521148	4.37366	0.0364985	0.0950928
Cnmd	0.178216	1.08384	0.676573	2.54745
Slit3	0.122484	1.08106	0.516833	4.4622	0.0346528	0.0919061
Nectin2	0.272244	1.07383	0.212478	27.1341	1.89819e-07	7.03058e-06
Il2rg	0.899284	1.07371	0.187367	33.5659	6.88904e-09	4.1846e-07
Anxa3	0.219024	1.07161	0.293202	13.626	0.00022307	0.00219762
Trpm3	0.661706	1.06881	0.286871	13.842	0.000198837	0.00198837
Gata3	0.126879	1.06045	0.462812	5.42191	0.0198856	0.0625211
Tnf	0.270684	1.05932	0.390344	7.47904	0.00624214	0.0274076
Clu	9.50372	1.05893	0.110602	90.4371	1.90948e-21	1.84525e-18
Cers4	0.201731	1.05798	0.264841	16.7492	4.26608e-05	0.000581544
Fgf8	0.171797	1.05469	0.283063	14.9251	0.000111863	0.00125965
Fads2b	0.318399	1.05312	0.260279	16.6429	4.51193e-05	0.000607882
Acta2	1.24586	1.04626	0.291225	12.6738
Jag1	0.311813	1.04353	0.234278	20.2234	6.89053e-06	0.000137423
Sned1	0.0763498	1.03855	0.578044	3.28741	0.0698133	0.145058
Ccbe1	0.0692545	1.03537	0.521593	4.21252	0.0401267	0.101221
Wfdc21	0.409318	1.03199	0.3506	8.69191	0.00319625	0.0168033
Rgs4	0.248472	1.03172	0.384491	7.20849	0.00725595	0.0306683
Prickle1	0.118455	1.03053	0.479087	4.62858	0.0314436	0.085792
Nmral1	0.392016	1.02973	0.200027	28.5987	8.90411e-08	3.75598e-06
Aurkb	0.749174	1.02432	0.208968	25.1126	5.40786e-07	1.71088e-05
Sh3d21	0.304498	1.01992	0.283531	13.3089	0.000264146	0.00249367
Inpp4b	0.0810881	1.01322	0.650631	2.42331	0.119542	0.20499
H1f10	1.54093	1.01278	0.154099	43.6285	3.97018e-11	4.53796e-09
Zc2hc1c	0.169822	1.01161	0.381397	7.35519	0.00668694	0.0288483
Gm57204	0.200871	1.01025	0.326582	9.8215	0.00172483	0.0105434
a	0.15464	1.00997	0.348555	8.8028	0.00300769	0.016014
Clec12b	0.181895	1.00652	0.366031	7.92629	0.00487217	0.0228558
Nupr1	0.670064	1.00275	0.277372	13.1069	0.00029421	0.00272901
Acot1	0.381038	0.995528	0.251788	15.6952	7.44147e-05	0.000908183
Nos2	0.618693	0.980213	0.205547	23.2577	1.4168e-06	3.73713e-05
Gm32934	0.0499683	0.967911	0.627758	2.46717	0.116247	0.201831
3110045C21Rik	0.0961959	0.966923	0.399338	6.18335	0.0128958	0.0458162
Dock8	0.087588	0.96642	0.425293	5.36643	0.0205279	0.0640105
Hey1	0.311248	0.961812	0.248845	15.1158	0.000101112	0.00115697
Eldr	0.293038	0.960669	0.234793	17.9083	2.31806e-05	0.000358674
Mmp23	0.127353	0.956614	0.42665	5.05047	0.0246192	0.072554
Rtp4	0.307156	0.954015	0.294033	10.5502	0.00116173	0.00785572
Rhov	0.396563	0.953833	0.237992	16.3951	5.14178e-05	0.000676449
Gpc4	0.233617	0.952348	0.290873	10.9307	0.00094583	0.00671415
Astn2	0.0821027	0.949796	0.557983	2.87253	0.0901029	0.171034
0610040J01Rik	0.110267	0.946244	0.446122	4.53615	0.0331862	0.0891714
Gatm	0.0875014	0.943502	1.01601	0.854553
Ly6d	6.09041	0.943011	0.190734	24.11	9.0987e-07	2.57232e-05
Pkp2	0.152517	0.942282	0.345176	7.63223	0.00573345	0.0258029
Runx1	0.467894	0.936074	0.258436	13.1174	0.00029257	0.0027233
Nrarp	0.535412	0.932337	0.18567	25.8356	3.71768e-07	1.2506e-05
Lin28b	0.110696	0.930916	0.627598	2.28414
Mylk3	0.262901	0.929248	0.26979	12.1725	0.000485002	0.00398421
Chga	0.326358	0.928743	0.235738	16.0398	6.20254e-05	0.000785695
St3gal4	0.0848664	0.927508	0.500728	3.5804	0.0584649	0.129314
Olig1	0.0810674	0.922846	0.66672	1.9163	0.166265	0.254643
Macc1	0.129696	0.922827	0.341129	7.47489	0.00625653	0.0274368
Tmsb15b1	0.21423	0.919532	0.242719	15.1355	0.000100065	0.0011487
Sct	0.138566	0.918525	0.462619	3.92645
H2bc27	0.146126	0.917884	0.335466	7.80131	0.00522083	0.0240008
Gm5111	0.111943	0.917672	0.34347	7.5411	0.00603074	0.0267669
Gm31597	0.264557	0.915162	0.237414	15.2406	9.4647e-05	0.00110076
Gt(ROSA)26Sor	0.326686	0.913547	0.19994	21.7223	3.15108e-06	7.11167e-05
Ramp2	0.0661143	0.911094	0.616928	2.22521	0.135774	0.222317
Tead2	0.228472	0.910889	0.303811	9.27729	0.00232013	0.0131817
Gm33474	0.113695	0.90817	0.371064	6.55773	0.010443	0.0394487
Shf	0.179806	0.902806	0.289344	10.0594	0.00151575	0.00960217
Crabp1	0.176894	0.902236	0.707548	1.6095
St6gal1	0.0594366	0.901724	0.661329	1.88671	0.169574	0.258137
Sord	0.107061	0.901409	0.36045	6.54365	0.0105259	0.0396494
Il4	0.0862177	0.9012	0.588565	2.36832	0.12382	0.209782
Sobp	0.127324	0.901012	0.476694	3.58309	0.0583705	0.129212
A3galt2	0.150327	0.898979	1.03776	0.74601
Cap2	0.0725574	0.894947	0.507934	3.27067	0.0705288	0.145844
St3gal6	0.114541	0.894876	0.40606	5.03037	0.0249065	0.0731574
Prtg	0.0436657	0.891837	1.0177	0.774476	0.378836	0.446307
Adra1b	0.0611259	0.888457	0.584228	2.41444	0.120221	0.205723
Nif3l1	0.429945	0.879038	0.190601	22.7643
Frmd3	0.135548	0.876422	0.534304	2.76714
Cenpa	1.73319	0.876339	0.222804	15.435	8.53939e-05	0.00101084
3830403N18Rik	0.0284206	0.876031	1.37819	0.397409	0.52843	0.573595
Tnmd	0.0912549	0.873939	0.505021	3.08579	0.0789787	0.157231
Il1rn	0.422233	0.872906	0.26938	10.5468	0.00116386	0.00786214
Fbln1	0.478083	0.871156	0.188479	22.0082	2.71482e-06	6.35651e-05
Cracr2b	0.257572	0.870722	0.272356	10.4002	0.00126001	0.00833474
Gsn	0.856227	0.869779	0.261195	10.9679
Igfbpl1	0.080966	0.869276	0.498298	3.22806	0.0723863	0.148231
5730507C01Rik	0.127554	0.867611	0.31692	8.1622	0.00427725	0.0207763
Frmpd4	0.176049	0.866036	0.536678	2.59594	0.107138	0.191151
Pole	0.429193	0.865565	0.252297	12.1628	0.000487524	0.00400184
Aldh2	0.709311	0.864992	0.168223	26.8611	2.18613e-07	7.95839e-06
Arhgap19	0.137028	0.864391	0.312899	8.16919	0.0042608	0.0207193
Gpm6b	0.109479	0.863744	0.502329	2.97385	0.0846204	0.164415
Aim2	0.638021	0.86319	0.176396	24.3363	8.08991e-07	2.33684e-05
Rnf32	0.581988	0.862924	0.194223	20.6522	5.50742e-06	0.000115017
Isg20	0.255893	0.862889	0.310633	7.97154	0.00475184	0.0224698
Hmx2	0.103017	0.85886	0.50682	2.98012	0.0842928	0.164018
Igsf21	0.214008	0.858465	0.319779	7.4048	0.00650502	0.0282584
Gnasas1	0.0983075	0.855203	0.395434	4.94405	0.0261806	0.075625
Tnfrsf4	0.313116	0.85506	0.247185	12.2343	0.000469186	0.0038843
Rbp1	0.323038	0.853915	0.323053	6.96919	0.00829249	0.0335725
A230051N06Rik	0.0407869	0.85292	0.869763	0.978299	0.322619	0.400456
Txndc16	0.427071	0.851741	0.277531	9.51855	0.00203406	0.0119261
Gng13	0.261976	0.848208	0.358285	5.66992	0.0172582	0.0567269
Plk1	0.543549	0.840759	0.228696	14.0514	0.000177883	0.00181642
Cdca3	1.39156	0.836611	0.144865	34.3498	4.60438e-09	2.91337e-07
Arhgef39	0.134203	0.836227	0.324983	6.85759	0.00882655	0.0351555
Gas2	0.19938	0.831875	0.261262	10.8409	0.000992821	0.00695236
Gm13832	0.0339154	0.830751	1.12781	0.544443	0.460597	0.517071
Kazald1	0.222263	0.829716	0.307899	7.33976	0.00674458	0.0290616
Gm39150	0.0873018	0.828848	0.512943	2.62371	0.105278	0.189198
Mest	0.17901	0.828411	0.503774	2.71491	0.0994145	0.182486
Ern1	0.441921	0.828053	0.250391	11.083	0.000871246	0.00631171
Bst1	0.212887	0.827569	0.24848	11.9621	0.000542927	0.00431976
Cdk1	3.61338	0.82605	0.148358	31.2796	2.23411e-08	1.13986e-06
Slc5a9	0.160721	0.824009	0.341329	5.97767	0.0144881	0.0499866
Actg2	0.119967	0.823975	0.363653	5.22138	0.0223108	0.0677805
Aurka	0.641324	0.819411	0.211197	15.5532	8.02141e-05	0.000960221
Edn2	0.256758	0.815744	0.353132	5.4418
Emp1	0.0650481	0.815564	0.842671	0.937281	0.332978	0.409056
Gucy1b2	0.0673899	0.811813	0.692031	1.39718	0.237196	0.324379
Lrig3	0.223698	0.808362	0.271592	8.96722	0.00274867	0.0149697
Nrg4	0.0710331	0.808304	0.506386	2.85209	0.0912551	0.172728
C030013E06Rik	0.183228	0.807704	0.325917	6.33537	0.0118354	0.0432455
AW011738	0.219492	0.807243	0.325363	6.34513	0.0117704	0.0430555
Fzd3	0.161248	0.807025	0.286561	8.50763	0.0035366	0.0179962
Gm28198	0.324654	0.806949	0.249515	11.2437
Mir100hg	0.554833	0.806947	0.25388	10.0265	0.00154308	0.00969528
Mis18a	0.583645	0.805456	0.156059	29.5481	5.45456e-08	2.52095e-06
D030068K23Rik	0.20137	0.805266	0.380422	4.71202	0.0299525	0.0830017
Gsto1	0.298706	0.803321	0.207149	16.0106	6.29901e-05	0.000795153
Cryab	0.948545	0.800709	0.173906	21.529
Gm57012	0.166295	0.797495	0.388561	4.33224	0.0373969	0.0966989
Fbxo5	0.984424	0.796756	0.211882	14.5534	0.000136244	0.00147783
Tbc1d4	1.88024	0.795984	0.168606	22.515	2.08507e-06	5.20288e-05
Vangl1	0.220531	0.794722	0.228467	12.7791	0.000350506	0.00308179
Abca1	0.110405	0.793098	0.36945	4.68318	0.0304593	0.0839684
Mxd3	0.259672	0.792963	0.269517	9.50024	0.00205445	0.0120191
Acbd7	0.09681	0.790628	0.491671	2.62317	0.105314	0.18923
Spic	0.16615	0.790565	0.314185	6.58334	0.0102938	0.0390517
Gabrg3	0.312952	0.789616	0.342303	5.53567	0.0186326	0.0596269
Erg	0.135034	0.788579	0.374044	4.48699	0.0341537	0.0909943
Camk2n1	0.0900766	0.787278	0.415047	3.67914	0.0550974	0.124165
Pimreg	0.199189	0.787094	0.285298	7.86843	0.00503053	0.0234074
Dgki	0.114274	0.786365	0.42183	3.54732	0.0596416	0.131098
Slc7a8	0.140471	0.785534	0.564379	1.91496	0.166414	0.254823
Far2	0.485575	0.784964	0.203318	15.4297	8.5632e-05	0.00101253
Nfil3	0.526824	0.78368	0.181299	19.2629	1.13897e-05	0.000200954
Wnt6	0.127601	0.782774	0.379635	4.29588	0.0382049	0.0982622
Resp18	0.146594	0.781589	0.474663	2.71754
Qrich2	0.144875	0.781443	0.303847	7.375	0.00661367	0.0285902
Bcam	0.386001	0.781315	0.200931	15.4697	8.38373e-05	0.000995744
1700016P03Rik	0.0980973	0.781269	0.44124	3.22956	0.0723202	0.148124
Il33	0.100802	0.778379	0.653633	1.41	0.235056	0.322405
E130114P18Rik	0.292482	0.777674	0.250385	9.99188	0.00157232	0.00983163
Tasl	0.213968	0.776379	0.231613	12.9595	0.000318295	0.00290677
Sh2d4a	0.245288	0.775111	0.250614	9.68329	0.00185952	0.0111739
Stac2	0.229294	0.773699	0.834372	0.856527	0.354712	0.426422
Dgat2	0.346166	0.773396	0.248519	9.87722	0.00167338	0.0103075
Gm45486	0.130261	0.772343	0.410321	3.5898	0.0581354	0.128853
Gm10634	0.0994458	0.768992	0.423264	3.39652	0.065334	0.138922
Gm47795	0.18484	0.768058	0.362853	4.59772	0.0320144	0.0869477
Gm13822	1.03075	0.768045	0.507991	2.27062	0.131847	0.218137
Phf11d	0.162733	0.76492	0.37414	4.16414	0.0412884	0.103003
Serpinb10	0.57057	0.764769	0.196343	15.6294	7.70472e-05	0.000930695
Phyhd1	0.133321	0.764738	0.338577	5.23779	0.0221013	0.0672594
Fam107a	0.0501632	0.762848	0.961372	0.641457
Insig1	0.198298	0.761551	0.267193	8.28175	0.00400456	0.0196985
H3c14	0.137097	0.761129	0.342185	5.00649	0.0252524	0.0738671
Aldh3b1	0.224509	0.757689	0.2411	10.2703	0.00135192	0.00880568
Ttk	0.40078	0.755459	0.195482	16.0849	6.05653e-05	0.000771943
Plb1	12.21	0.75501	0.0936375	64.8125	8.23765e-16	3.50265e-13
Irf2bpl	0.134842	0.75467	0.372647	4.11647	0.0424677	0.104911
Msx1	0.258446	0.754092	0.308195	6.08172	0.0136588	0.0479027
Cdc42ep2	0.262394	0.753343	0.243095	9.7774	0.0017667	0.0107192
Cadm3	0.0923074	0.751305	0.420512	3.24997	0.0714247	0.146969
Hbegf	0.163457	0.750422	0.444286	2.87312	0.09007	0.171003
Sox5	0.0918158	0.748593	0.44582	3.04342	0.0810649	0.159815
H2bc21	0.214719	0.748546	0.245625	9.57124	0.0019765	0.0117072
Junos	0.158594	0.747603	0.297423	6.46599	0.0109958	0.0408977
Mgat4e	1.32151	0.747424	1.22825	0.366466
Maoa	0.586996	0.746039	0.182652	17.3502	3.10864e-05	0.00045329
Prkcz	0.19586	0.745926	0.24609	10.1794	0.00142022	0.00911648
Il1r1	0.294626	0.745677	0.22471	11.2159	0.000811002	0.00594265
Sgo1	0.431273	0.744308	0.204315	14.6533	0.000129208	0.00141305
Plcb1	0.0645259	0.744268	0.757116	0.976808	0.322988	0.400663
Col14a1	0.463982	0.74361	0.258558	8.42321	0.0037046	0.0186106
Rtkn2	0.158141	0.73992	0.274049	7.913	0.00490809	0.0229635
Rasl11a	0.157683	0.737106	0.556447	1.76377
Krt14	16.8191	0.736363	0.103851	49.9465	1.57992e-12	2.70879e-10
Stat4	0.0583701	0.736069	0.655149	1.27469	0.258888	0.343997
H2bc18	0.166995	0.73341	0.291547	6.83972	0.00891527	0.0353749
Gm38037	0.104277	0.733347	0.375272	4.15472	0.0415186	0.103359
Gm30085	0.14976	0.732121	0.320054	5.37245	0.0204572	0.0638461
Ecscr	0.292552	0.731742	0.247944	8.88222	0.00287961	0.0155067
Gm12610	0.558164	0.7311	0.188673	15.5427	8.0661e-05	0.000964088
Gm29585	0.579305	0.728832	0.467375	2.41717
Cxcl12	0.182596	0.727846	0.546595	1.77984
Cngb1	0.201013	0.727647	0.316711	5.37491	0.0204284	0.063775
Gm15726	0.453409	0.727626	0.263394	7.65556	0.00565977	0.0255599
Idh1	1.00076	0.726821	0.142682	26.7353	2.33317e-07	8.40731e-06
Tnni1	0.161988	0.726316	0.530909	1.91535
Gm56577	0.37906	0.725919	0.197724	15.2191	9.57327e-05	0.00111217
Acy1	0.468353	0.72547	0.152305	24.6625	6.83008e-07	2.05095e-05
Pou2af3	0.461153	0.722149	0.247257	8.74428	0.00310575	0.0164168
Gm43251	0.239861	0.72184	0.314782	5.43832	0.0196996	0.0621201
Gm7706	0.140909	0.721272	0.391017	3.42338	0.0642792	0.137621
Kifc5b	0.211802	0.720968	0.282673	6.84922	0.008868	0.0352579
Mtfr2	0.138668	0.720571	0.312117	5.86348	0.0154582	0.052298
Tuba1c	5.62607	0.717689	0.0906272	63.6953	1.4523e-15	5.51354e-13
Igfbp2	0.350035	0.716385	0.318732	5.11163	0.0237659	0.0706465
Cenpt	0.203659	0.712331	0.233181	10.4467	0.00122866	0.0081629
Dus4l	0.341708	0.711882	0.195831	14.1823	0.00016592	0.00171904
Plac8	0.056444	0.710657	0.666955	1.1386	0.285949	0.367772
Eln	0.207008	0.705822	0.323723	4.80416	0.0283912	0.0797775
2010110K18Rik	0.168366	0.701927	0.328872	4.84249	0.0277667	0.0785001
Nuak2	0.376485	0.701619	0.220696	10.2268	0.00138412	0.00894417
Pigz	0.137695	0.701441	0.349779	4.07489	0.0435251	0.106582
Creb5	0.192897	0.700782	0.523521	1.81385
Map2k6	0.263462	0.7001	0.251743	7.81495	0.00518159	0.023865
Igsf8	1.65522	0.699469	0.114863	38.0046	7.05792e-10	5.90754e-08
Spc25	1.20729	0.699397	0.175805	16.5499	4.73857e-05	0.000633598
Gm15886	0.20438	0.699076	0.444465	2.50568	0.113437	0.1987
2810408I11Rik	0.267997	0.698967	0.211855	12.1612	0.000487927	0.00400205
Pbk	1.52912	0.698071	0.167685	17.9936	2.21653e-05	0.000347005
Tnfsf15	0.115366	0.697624	0.399335	3.08025	0.0792481	0.157466
Cdkn2b	0.78438	0.697094	0.155272	21.2116	4.1127e-06	8.94029e-05
H2ax	4.80375	0.695302	0.112668	38.6852	4.97964e-10	4.23469e-08
Krt15	0.0848663	0.693394	1.09654	0.401645
Cdc25b	0.241444	0.691183	0.242091	8.37722	0.00379952	0.0189264
Hes1	1.16773	0.687982	0.230144	8.90931	0.00283721	0.0153094
Gm20033	0.1053	0.68706	0.558119	1.53124	0.215926	0.30365
Clec2m	0.0860284	0.686573	0.612284	1.2763	0.258588	0.343672
Cited2	1.07693	0.683923	0.234404	8.51845	0.00351563	0.0179267
Zswim3	0.238093	0.683913	0.278087	6.09773	0.0135355	0.0475174
Spc24	1.95512	0.683774	0.117916	35.3105	2.81118e-09	1.91813e-07
Gm57201	0.191696	0.683719	0.338411	4.33338	0.0373719	0.0966578
Tmprss11d	0.167903	0.68314	0.413853	2.83666	0.0921358	0.173958
Slit2	0.0725832	0.68173	0.769954	0.782881	0.376261	0.44411
Ska1	0.361402	0.680789	0.216658	11.0113	0.000905591	0.00648682
Eme1	0.204803	0.680609	0.240953	9.36177	0.00221558	0.0127168
Sel1l2	0.236294	0.677399	0.300152	5.26847	0.0217151	0.0666564
Zmat4	0.0475547	0.675639	0.650666	1.14412	0.284783	0.366696
Ncaph	0.378016	0.674385	0.184289	15.8499	6.85713e-05	0.000847572
Slc27a2	0.273318	0.673372	0.245742	7.84855	0.00508614	0.0235683
Cacna1c	0.299664	0.672888	0.301884	4.98366	0.0255878	0.0744386
Sptlc3	0.131575	0.671895	0.374596	3.29976	0.06929	0.144421
Sulf2	0.18417	0.671514	0.285589	5.61737	0.0177833	0.0578092
Cenpv	0.405128	0.669191	0.198445	11.9812	0.000537402	0.00429517
Gm32391	0.0576158	0.666721	0.679823	0.960164	0.327146	0.404178
H3c4	0.635414	0.666483	0.221032	9.21614	0.00239891	0.0134923
1810007D17Rik	0.0469147	0.665688	0.712675	0.873861	0.349889	0.421924
Tmem97	0.851335	0.664631	0.138427	24.8727	6.12442e-07	1.90917e-05
Pif1	0.103284	0.663933	0.417237	2.64756	0.103709	0.187248
Irak3	0.0662271	0.663195	0.541385	1.50219	0.220335	0.307716
Birc5	2.79654	0.662669	0.156365	18.2139	1.97431e-05	0.000316545
Myog	0.121591	0.658973	0.655953	1.01065	0.314746	0.393371
Gm34121	0.275042	0.658364	0.401826	2.70314	0.100151	0.183316
Dlgap1	0.213368	0.657814	0.703253	0.878023
Krt5	11.162	0.657775	0.162689	16.2454	5.56448e-05	0.000717845
Sapcd2	0.172577	0.656734	0.277781	5.8559	0.0155249	0.0524738
Cdca8	2.38799	0.656294	0.140811	22.2253	2.42462e-06	5.81988e-05
Dapk1	0.503263	0.655811	0.184588	12.7557	0.000354918	0.00311029
Rflnb	0.168035	0.655097	0.313113	4.40594	0.0358139	0.094047
Gpr153	0.0948238	0.654111	2.37902	0.0750078
Skint6	0.0449586	0.654105	0.77056	0.718145	0.396753	0.461785
Gstt2	1.28864	0.651658	0.117923	31.6	1.89429e-08	9.91935e-07
Tubb4b	5.79312	0.65142	0.10993	35.3309	2.78181e-09	1.91813e-07
Rbmx2	0.828279	0.650166	0.120549	32.586	1.14032e-08	6.44765e-07
Rhou	0.169536	0.648761	0.311802	4.41905	0.0355398	0.0935734
Morrbid	0.170474	0.646199	0.487474	1.76328	0.184216	0.272842
Tk1	0.81955	0.645363	0.232484	7.94645	0.00481819	0.022691
1700037H04Rik	0.402748	0.644016	0.169653	15.7685	7.15843e-05	0.000875651
1700028E10Rik	0.125635	0.643731	0.34538	3.68126	0.0550272	0.1241
Ccdc80	0.130792	0.639584	0.538549	1.40325	0.236181	0.323365
Ckap4	0.975976	0.638735	0.116488	31.7153	1.78508e-08	9.39378e-07
Slc25a30	0.232094	0.637554	0.225621	8.426	0.00369892	0.0186078
Il13	1.13307	0.63723	0.240609	7.0472	0.00793891	0.0326589
Nek3	0.103639	0.635971	0.426982	2.319	0.127802	0.213964
Foxs1	0.353618	0.635958	0.212341	9.06783	0.00260146	0.0143729
Cdkn2d	0.500367	0.63554	0.196316	11.3635	0.000749027	0.00557965
Pclaf	8.78311	0.63484	0.162895	15.198	9.68038e-05	0.00111972
Kcnq5	0.0658705	0.634465	0.54601	1.40515	0.235864	0.322991
Prc1	1.51784	0.633432	0.187206	11.6675	0.000636002	0.00492403
Ctnna3	0.144812	0.633285	0.449248	2.03923	0.153288	0.24115
Ltb	2.41304	0.632964	0.151227	17.6263	2.68845e-05	0.000404218
Prnd	0.280493	0.632963	0.284059	5.26398	0.0217712	0.0667489
Wdcp	0.4271	0.63147	0.299043	4.5503	0.0329129	0.0887754
Cth	0.233901	0.631284	0.268915	5.8974	0.0151633	0.0516437
Gm57092	0.100831	0.63107	0.55713	1.3217	0.250286	0.336127
Ccnyl1	0.448719	0.629976	0.201179	9.84956	0.00169872	0.0104258
Vcan	0.413553	0.629064	0.238651	7.10171	0.00770105	0.0319524
Kif27	0.0877684	0.628204	0.438985	2.14123	0.143387	0.230717
Nt5dc2	0.385505	0.627922	0.192953	11.796	0.000593589	0.00467396
Tiam2	0.119944	0.627777	0.416388	2.27717	0.131291	0.21759
Phlda1	0.682784	0.625709	0.251539	6.21883	0.0126398	0.0451994
Arg2	1.24259	0.623925	0.131863	23.106	1.5331e-06	3.99154e-05
Aldh3b2	0.13942	0.622483	0.463918	1.79612	0.180182	0.268766
Tnip3	0.387834	0.622346	0.218238	8.43493	0.00368081	0.0185436
Cxcl10	30.7081	0.622079	0.124409	24.874	6.12031e-07	1.90917e-05
Sgk1	0.609791	0.621552	0.216563	8.39041	0.00377206	0.0188249
Kif2c	0.441661	0.621034	0.190701	11.5393	0.000681418	0.00518624
Shcbp1	0.824268	0.620942	0.156813	17.3147	3.1673e-05	0.000461211
Cenpu	0.367465	0.620107	0.184451	12.8678	0.000334293	0.00300129
Slc6a20a	0.443099	0.620077	0.250388	6.237	0.0125108	0.0449778
Bicc1	0.122141	0.618982	0.459019	1.83742
Ccna2	1.55608	0.618952	0.162199	15.1049	0.0001017	0.00116157
Airn	0.702072	0.618107	0.198059	9.83893	0.00170856	0.010462
Pak3	0.57181	0.617251	0.19453	10.4382	0.00123433	0.00819034
Cenpo	0.226906	0.614132	0.220517	8.46802	0.00361444	0.0182837
Gm13963	0.103896	0.613439	0.431736	2.03826	0.153385	0.241258
Cpne5	0.0524692	0.613336	0.970741	0.422362
Simc1	0.384412	0.612583	0.277472	4.91341	0.026649	0.0762527
Psmb8	5.37536	0.61252	0.0902812	46.2838	1.02307e-11	1.35941e-09
Tacc3	1.05491	0.612284	0.132721	22.7713	1.82474e-06	4.61832e-05
Mcm10	0.210323	0.612065	0.261052	6.42022	0.0112828	0.0416446
H1f3	0.416345	0.610709	0.219914	7.83073	0.00513653	0.0237397
Tubb5	22.7932	0.610689	0.0879054	48.2946	3.66757e-12	5.34058e-10
Kirrel3	0.820534	0.610423	0.271663	5.0291	0.0249249	0.0731911
Rrm2	3.49571	0.608713	0.171857	12.6846	0.000368679	0.00319923
Id1	0.774186	0.606946	0.326357	3.43699	0.0637518	0.136905
Ercc6l	0.168678	0.605137	0.259442	6.75972	0.00932382	0.0364785
Cyb5r1	0.468688	0.603735	0.150946	17.4839	2.8975e-05	0.000429466
Hpgd	0.751351	0.603398	0.243877	6.15351	0.0131152	0.046317
Slc25a21	0.240767	0.602438	0.347988	3.19898	0.0736842	0.149964
Rnd3	0.264846	0.602022	0.372018	2.63468	0.104553	0.188277
Psrc1	0.461031	0.599902	0.20806	8.43077	0.00368924	0.0185773
Card19	0.245169	0.599662	0.221988	7.56328	0.00595696	0.0264726
AA386476	0.166302	0.599583	0.295624	4.20077	0.0404056	0.101684
Pmf1	1.39631	0.599508	0.106476	35.3079	2.81493e-09	1.91813e-07
Tmem132c	0.0856048	0.599372	0.588351	1.04533	0.306585	0.385955
H2bc9	0.225775	0.59823	0.315403	3.79697	0.0513455	0.118989
Xlr3a	0.0492844	0.597448	0.623813	1.0182	0.312947	0.391967
Tnfrsf8	0.779599	0.59734	0.147769	17.0949	3.5558e-05	0.000503872
Esco2	0.622285	0.595058	0.214478	8.28351	0.00400068	0.0196885
Lyzl4	0.384313	0.59306	0.229844	7.14335	0.00752425	0.0314521
Mab21l3	0.0865957	0.592419	0.411579	2.29902	0.129456	0.215692
Pdk4	0.0424016	0.591982	0.934534	0.396356	0.528977	0.574071
Gm15821	0.486398	0.590591	0.166034	12.8924	0.000329925	0.0029797
Krt20	0.156693	0.588231	0.934379	0.395981	0.529172	0.574165
Elavl3	0.117017	0.58594	0.460397	1.61255	0.204134	0.291973
Sorcs1	0.0663602	0.585926	0.607318	0.974107	0.323658	0.400989
Cdo1	0.256761	0.58579	0.381217	2.34244	0.125892	0.211612
Cdca5	0.30304	0.585608	0.218806	8.49852	0.00355436	0.0180606
H1f1	0.24062	0.585211	0.260558	5.65749	0.017381	0.0569192
Haus4	0.670152	0.58518	0.156917	15.4099	8.65346e-05	0.00102207
Arf2	0.484518	0.585057	0.171814	11.9754	0.000539082	0.00429891
Serpinb6b	0.948172	0.584704	0.192359	9.48161	0.00207542	0.0121352
Lsm8	2.74726	0.584591	0.0778424	61.926	3.56602e-15	1.2228e-12
Gm17359	0.106352	0.584236	0.430145	1.96209	0.16129	0.24952
Chst12	0.450739	0.584063	0.164952	13.3172	0.00026298	0.00248708
Tubb3	0.0549005	0.582413	0.557356	1.14872	0.283817	0.365789
Psph	1.25969	0.581717	0.102554	35.0438	3.22369e-09	2.16885e-07
B930046K06Rik	0.128511	0.581715	0.371056	2.57051	0.108873	0.193241
Fignl1	0.610405	0.581664	0.158829	16.2142	5.65684e-05	0.000727993
Camk2d	0.234069	0.581402	0.288216	4.12248	0.0423169	0.104709
Ppan	0.805871	0.578673	0.122683	23.6785	1.13846e-06	3.07154e-05
Adamtsl1	0.30464	0.577286	0.456863	1.63174
Gas2l3	0.259933	0.575987	0.280357	4.51128	0.0336721	0.0901143
Zfp532	0.180508	0.575977	0.273066	4.61904	0.0316189	0.086226
Pmaip1	1.28555	0.573245	0.145806	15.8154	6.9831e-05	0.000859148
Cdt1	0.647044	0.572503	0.19236	9.21125	0.00240533	0.0135069
Gm9484	0.046257	0.572399	0.615342	0.923208	0.336634	0.411407
Pik3r6	0.12421	0.57165	0.344343	3.13608	0.0765777	0.153937
Crtac1	0.189042	0.571302	0.375086	2.50949	0.113163	0.19837
Kif18a	0.466682	0.570727	0.193299	9.09336	0.0025654	0.0142254
Nr4a1	0.0728505	0.570062	0.553989	1.05718	0.30386	0.383386
Lmcd1	0.342336	0.56932	0.236466	5.99935	0.0143112	0.0494885
Il1rl2	0.2736	0.567804	0.213092	7.22157	0.00720325	0.0305427
Cks1b	4.39826	0.567048	0.0923915	38.9981	4.24207e-10	3.69394e-08
Zdhhc14	0.143295	0.565694	0.368143	2.39594	0.121651	0.207534
Tipin	1.91243	0.56554	0.120823	23.1533	1.49583e-06	3.91642e-05
Mid1ip1	0.382662	0.565533	0.212256	7.3568	0.00668097	0.0288414
Garem1	0.0854845	0.564423	0.44456	1.65173	0.198723	0.286159
Il12a	0.431136	0.564232	0.234249	6.03283	0.0140422	0.0489209
Nup85	3.07949	0.564064	0.0920357	38.3343	5.96063e-10	5.02869e-08
2900060B14Rik	0.666205	0.563021	0.241206	5.52173	0.0187816	0.0599546
Myo1h	0.135492	0.560816	0.328619	3.03288	0.0815929	0.160385
Slc16a10	0.228562	0.559708	0.310889	3.41601	0.0645669	0.138014
Fdps	1.99522	0.558069	0.105522	29.241	6.39121e-08	2.83077e-06
Rab3a	0.303093	0.554877	0.191309	9.28376	0.00231195	0.0131563
Arl5c	0.458971	0.5547	0.21656	6.63081	0.010023	0.0383115
Pelo	0.561499	0.552391	0.136401	18.0546	2.14654e-05	0.00033754
Nedd4l	0.512225	0.55181	0.212683	6.7928	0.0091526	0.0360608
Kifc1	0.463098	0.551751	0.18563	9.5562	0.00199276	0.0117553
Dact2	0.195781	0.551454	0.275664	4.04104	0.0444064	0.107929
Oip5	0.211616	0.550789	0.245019	6.77741	0.00923188	0.0362711
Shroom3	0.118816	0.550566	0.332257	2.87131	0.0901717	0.171074
Cenps	0.685932	0.550513	0.159076	13.541	0.000233413	0.00227841
Bub3	2.54548	0.548865	0.0910986	38.8355	4.61068e-10	3.95254e-08
Gm57170	0.101264	0.548263	0.402289	1.96045	0.161466	0.249691
Cdkn3	0.62372	0.547814	0.209956	7.00462	0.00812997	0.0331564
Ckap2l	1.03454	0.547277	0.171292	10.5257	0.00117728	0.00792145
Trim36	0.0377888	0.547213	0.756586	0.561282	0.453744	0.511213
Atp6v1g1	3.93743	0.54654	0.0715373	60.39	7.78079e-15	2.43264e-12
Pyroxd1	0.908283	0.546471	0.131922	17.9892	2.22162e-05	0.000347202
Ifit1	0.153891	0.545397	0.461197	1.40715	0.23553	0.322752
Mdk	27.8498	0.545084	0.0906973	36.0451	1.92799e-09	1.40374e-07
Reep4	0.907492	0.543571	0.132016	18.5784	1.63055e-05	0.000269852
Dclk2	0.165119	0.543375	0.320226	2.88795	0.0892442	0.169951
Ooep	2.79771	0.542335	0.180836	8.96737	0.00274844	0.0149697
Fgf21	29.5024	0.542018	0.127173	18.0879	2.10935e-05	0.000334164
Frmd5	0.404009	0.540752	0.24241	5.20451	0.0225284	0.0681609
Gm44777	0.158831	0.540171	0.281117	4.33463	0.0373446	0.0966107
Cd81	2.83863	0.539964	0.116086	21.8588	2.93465e-06	6.7757e-05
Slc24a5	1.19353	0.539249	0.117358	22.5102	2.09029e-06	5.20368e-05
Ndrg1	0.0927188	0.539187	0.427888	1.68554	0.19419	0.282161
D17H6S56E-5	23.4197	0.53902	0.130209	17.0776	3.58829e-05	0.000505406
Kif22	0.494784	0.538945	0.185269	9.11157	0.00253998	0.0141139
Pth	1.41838	0.53872	0.102821	28.1776	1.10677e-07	4.47084e-06
Acer2	0.74119	0.538207	0.156511	12.5836	0.00038914	0.00334403
Tmsb15b2	0.298743	0.537749	0.231689	5.68083	0.0171513	0.0564104
Nsg1	0.277639	0.53757	0.280448	4.20109	0.040398	0.101684
Akr7a5	1.33656	0.537563	0.102785	29.1078	6.84624e-08	2.99488e-06
Gm42047	0.699959	0.537117	0.221977	5.97888	0.0144782	0.0499686
Idh2	2.29622	0.537053	0.0876712	40.2995	2.1786e-10	2.08635e-08
Phf6	0.542321	0.536634	0.175871	9.87586	0.00167461	0.0103075
Knl1	1.18036	0.534624	0.169711	10.2481	0.00136826	0.00888491
Mx2	0.105402	0.533561	0.547329	0.975684	0.323267	0.400691
1700019D03Rik	0.149577	0.533282	0.334462	2.64866	0.103638	0.187231
P2ry14	0.0908285	0.532794	0.468964	1.38076	0.239971	0.326828
Cldn7	3.64255	0.532197	0.129293	17.1458	3.46178e-05	0.000495202
Acaa2	0.383276	0.53133	0.182157	9.23443	0.00237506	0.0133865
Sat1	1.58947	0.530398	0.160871	10.93	0.000946171	0.00671415
9130230L23Rik	0.159648	0.530319	0.363547	2.28444	0.130677	0.217013
Cnksr3	0.30913	0.530264	0.255032	4.39898	0.0359605	0.0943567
Bst2	3.82349	0.529281	0.108443	23.8528	1.03992e-06	2.84175e-05
Rhpn2	0.480674	0.528979	0.381593	1.93318	0.164411	0.253031
Lmo4	0.955233	0.52858	0.138822	15.1538	9.90982e-05	0.00114006
Grid1	2.28553	0.52739	0.169897	9.73515	0.00180778	0.0109372
Isl1	1.09401	0.527178	0.147562	13.1394	0.000289147	0.00269617
Rgcc	0.357048	0.527153	0.270709	3.83021	0.0503365	0.117677
Zfp791	0.126739	0.525645	0.365461	2.0834	0.148908	0.23634
Rhoc	0.51773	0.525214	0.198694	7.06005	0.00788219	0.032496
Mkrn2os	0.287362	0.524873	0.243136	4.78638	0.0286856	0.0803077
Creld2	2.62839	0.524725	0.0890405	36.0877	1.88634e-09	1.38721e-07
S100a6	4.2584	0.523738	0.15872	10.8546
Kif18b	0.12927	0.523683	0.348421	2.48246	0.115122	0.200548
2610035D17Rik	0.374058	0.523356	0.231539	5.17614	0.0228992	0.068801
Ccr7	0.0874488	0.523043	0.448098	1.43639	0.230724	0.3179
Tango6	0.442771	0.521842	0.212341	6.24797	0.0124336	0.0448638
Rfc5	1.21322	0.52156	0.118023	22.5748	2.0212e-06	5.05538e-05
Edn1	0.0690419	0.52106	0.585329	0.827319	0.363049	0.433376
H1f2	0.973514	0.520231	0.212813	5.9874	0.0144085	0.0497764
Ccnb1	0.945299	0.519823	0.197909	7.05162	0.00791934	0.0326163
Tenm4	0.287598	0.51896	0.335059	2.39502	0.121722	0.207623
Pck2	0.301371	0.518075	0.242265	4.94021
Lypd6	0.249957	0.517628	0.269618	3.83134	0.0503028	0.117644
Kif20a	0.682649	0.517515	0.170791	9.56015	0.00198847	0.0117553
Sgo2a	0.636067	0.517228	0.186003	8.40255	0.00374695	0.0187348
Urah	0.461013	0.516372	0.194011	7.10183	0.00770053	0.0319524
Platr4	0.129128	0.515985	0.35507	2.19971	0.138037	0.224878
Hmmr	1.95913	0.515978	0.17732	8.57622	0.00340582	0.0175236
Nlrc4	0.246629	0.515187	0.276763	3.81608
Fpgs	0.208663	0.514153	0.237693	4.99653	0.0253982	0.0740695
Tbcc	0.633185	0.514063	0.128163	17.2886	3.21116e-05	0.000465684
Exosc8	2.96041	0.511829	0.0877268	36.968	1.20086e-09	9.67057e-08
Slc26a2	0.121105	0.511136	0.313973	2.74555	0.0975252	0.180557
Lgi2	0.236603	0.51103	0.288336	3.42546	0.0641984	0.137503
Serpine2	0.69645	0.51092	0.200523	6.71729	0.00954827	0.0370161
Nrg1	1.32357	0.51078	0.206548	6.21802	0.0126456	0.0451994
Nusap1	2.00595	0.510054	0.168433	9.38218	0.00219104	0.0126237
Catsperg1	0.100259	0.509999	0.390992	1.92091	0.165756	0.254108
Igtp	0.321792	0.50954	0.268729	3.7001	0.0544093	0.123268
Ier3	0.61473	0.509243	0.283065	3.24638	0.0715814	0.147121
Gm56692	0.0894326	0.508436	0.553143	0.864139	0.352583	0.424361
Dcbld1	0.319797	0.506505	0.199091	7.44143	0.00637392	0.0277797
Ly6a	4.16997	0.50584	0.206788	5.95919	0.0146407	0.0503865
Gm49692	0.337239	0.505732	0.214018	5.79001	0.0161175	0.05386
Map3k6	0.125073	0.505421	0.389521	1.67867	0.195102	0.282899
Hmgb2	33.3062	0.505223	0.109423	21.2807	3.96701e-06	8.71267e-05
Cyp26a1	1.32032	0.504909	0.277818	3.31394	0.0686944	0.143631
Bmp3	0.593811	0.504149	0.189809	7.14048	0.00753632	0.0314902
Mfsd2a	0.179182	0.503915	0.262842	4.11463	0.0425137	0.104976
Tlcd1	0.36268	0.503697	0.188838	7.65242	0.00566962	0.0255915
Exo1	0.299888	0.503695	0.229832	5.82454	0.0158041	0.0531302
Hnf4g	0.0939496	0.503337	0.481034	1.18065	0.277224	0.359633
Ceacam10	1.17109	0.503209	0.178278	8.10291	0.00441942	0.0212861
Gm13663	0.216638	0.502914	0.32649	2.40121	0.121242	0.207036
Gm57030	0.0680673	0.502821	0.505265	1.07342	0.300175	0.380448
Ctsd	0.327138	0.502334	0.192629	7.04727	0.0079386	0.0326589
Gm34343	0.0716743	0.501651	0.462213	1.29866	0.254458	0.339896
Efcab8	0.151538	0.500945	0.291001	3.0384	0.0813162	0.160102
Ripply3	0.28823	0.500725	0.252855	4.07599	0.0434967	0.106561
Grm3	0.0629865	0.500231	0.988575	0.260889	0.60951	0.643597
Tram2	0.192262	0.500031	0.362721	1.91806
Ulbp1	0.378156	0.499575	0.215044	5.71581	0.0168128	0.0556415
Tmem248	0.555437	0.49926	0.138609	13.5066	0.000237731	0.00230783
Sncaip	0.15895	0.497436	0.453854	1.20364	0.272596	0.355851
B930036N10Rik	1.10519	0.496343	0.252534	3.87875	0.0489009	0.11531
Idi1	1.35119	0.496085	0.127997	16.1457	5.86515e-05	0.000750259
2810036E18Rik	0.165615	0.495726	0.299643	2.84039	0.091922	0.173712
Gm56848	0.137973	0.494757	0.52213	0.891294	0.345127	0.417752
Riox1	0.288576	0.494713	0.194982	6.64695	0.00993257	0.0380579
Dut	11.3379	0.49454	0.0944132	27.7691	1.36694e-07	5.36184e-06
H4c16	0.332907	0.493345	0.299946	2.73714	0.0980402	0.181152
Hacd2	1.59175	0.492947	0.0979985	27.1523	1.88045e-07	6.98922e-06
Cebpb	2.20424	0.492318	0.11773	17.6195	2.69803e-05	0.000405086
Sox11	0.234438	0.491802	0.355114	1.94081	0.163581	0.252219
Klhl23	0.229202	0.491111	0.278584	3.17281	0.0748734	0.151572
Madcam1	0.403937	0.490896	0.240622	4.36404	0.0367051	0.0953974
Tap2	2.39972	0.489818	0.091459	29.1429	6.72322e-08	2.95322e-06
1700120C14Rik	0.243934	0.489472	0.31913	2.46535	0.116382	0.201869
Ryr3	0.172338	0.488893	0.277069	3.13194	0.0767725	0.154125
Dap	0.892652	0.487732	0.132933	14.1592	0.000167976	0.00173865
Prps1l3	0.398441	0.487536	0.161098	11.1363	0.000846544	0.00617199
Cdc20	1.74279	0.487523	0.203638	5.76389	0.0163588	0.0545294
Fam111a	0.200453	0.486895	0.331953	2.47772	0.11547	0.200893
Cdkn1c	0.840479	0.486581	0.294734	2.72077	0.09905	0.182037
Avpi1	0.643907	0.485909	0.139381	13.1073	0.000294155	0.00272901
Osgin2	0.262816	0.485844	0.207093	6.15669	0.0130916	0.0462799
H2ac4	0.269979	0.485609	0.30136	2.80483	0.093981	0.175904
Cyp2a5	0.171549	0.485031	0.346058	1.98647	0.15871	0.246976
Wwc2	0.0711714	0.485028	0.529141	0.841481	0.358974	0.429662
Cenpn	0.413424	0.483882	0.172047	9.66249	0.00188069	0.0112733
Grm7	0.207521	0.48121	0.378295	1.66993	0.196268	0.283927
Slc25a35	0.290807	0.480929	0.22187	4.77194	0.0289273	0.0808057
Herpud2	0.743213	0.480646	0.176183	7.61771
Pja1	0.471058	0.480532	0.147946	11.5155	0.000690199	0.00523311
Cfap45	0.105205	0.480408	0.557108	0.751257	0.386078	0.452732
Lmo7	0.34291	0.480234	0.214975	5.09661	0.0239726	0.0711614
Chaf1b	0.313431	0.479928	0.215684	5.55403	0.0184382	0.0591813
Hey2	0.0959758	0.479698	0.440363	1.20114	0.273095	0.356239
Fxyd5	0.208746	0.47943	0.332484	2.08762	0.148497	0.235988
Dnajc17	0.441491	0.479397	0.15935	9.64751	0.00189608	0.011332
Haus8	0.442866	0.479018	0.172446	8.90255	0.00284772	0.0153583
Poc1a	0.795425	0.479017	0.123891	16.6095	4.59202e-05	0.000616328
Mpzl2	0.470654	0.478948	0.213115	5.14636	0.0232951	0.0695973
Fkbp9	0.354839	0.478743	0.174845	8.46096	0.0036285	0.0183235
Cenpl	0.240313	0.478326	0.235578	5.36214	0.0205785	0.0640617
Rsbn1	2.14511	0.478175	0.136616	12.4658	0.000414463	0.00353591
Ucma	0.600399	0.477376	0.24303	3.90486	0.0481466	0.113809
Grm8	0.0636277	0.477138	0.67019	0.548312	0.459008	0.515887
Prph	0.70734	0.476057	0.632786	0.566221
Pwwp3b	0.231469	0.475908	0.371927	1.64433	0.199733	0.287224
Ndc80	0.720178	0.475678	0.172516	8.52613	0.00350082	0.0178826
Ndst1	0.104889	0.474818	0.359633	1.81959	0.177362	0.265843
Sft2d3	0.288749	0.474557	0.204294	5.63465	0.0176089	0.0574355
Tuba1b	15.348	0.472596	0.0986393	23.1027	1.53579e-06	3.99154e-05
Cd276	0.166529	0.472416	0.255405	4.0445	0.0443154	0.107822
Suv39h1	0.472517	0.470963	0.166372	8.80172	0.00300947	0.016014
Ppic	1.12293	0.470204	0.120947	15.8821	6.74121e-05	0.000838118
Ptpn6	0.419195	0.468499	0.187459	6.56188	0.0104186	0.0393989
1110019D14Rik	0.188499	0.468153	0.255725	3.43296	0.0639073	0.137129
Hlcs	0.296696	0.467545	0.196273	6.5263	0.0106291	0.039939
Tcf7	0.744293	0.466416	0.162182	8.84061	0.00294601	0.0157923
Ier5l	1.97934	0.465637	0.156023	8.99735	0.00270371	0.0147842
Shmt2	0.883671	0.465152	0.120214	16.9392	3.85956e-05	0.000535601
Barx2	0.138363	0.465133	0.480819	0.933288	0.33401	0.409617
Lgmn	0.240385	0.463296	0.22042	4.84429	0.0277378	0.07846
Klf5	0.406988	0.462481	0.255163	3.27169	0.070485	0.145826
Hdc	5.83351	0.462373	0.158589	8.52102	0.00351068	0.0179225
Insm1	8.54066	0.462285	0.10275	20.4175	6.22588e-06	0.000128187
Haspin	0.181752	0.461891	0.255501	4.29341	0.0382603	0.0983366
Zbed5-ps	0.498174	0.461882	0.177489	6.98101	0.00823791	0.0334488
Chek1	0.540509	0.46173	0.174223	8.15266	0.0042998	0.0208422
Fam217a	0.0671839	0.461527	0.616666	0.592376	0.441502	0.501325
Epha2	0.23209	0.461009	0.228769	4.11733	0.042446	0.104911
Gm47790	0.129308	0.460882	0.324689	2.35546	0.124845	0.210785
Myl4	0.126351	0.460582	0.380978	1.46616	0.225952	0.313192
Zfp296	0.556316	0.460484	0.201112	5.41498	0.0199647	0.0626888
Myof	0.102738	0.460333	0.417098	1.21441	0.270461	0.354064
Gm12979	0.489431	0.459991	0.194266	6.01116	0.0142157	0.0492994
Cdk2	0.651139	0.459885	0.142934	12.5092	0.000404961	0.0034604
Tph1	0.0666818	0.459618	0.999502	0.223159
1110035H17Rik	0.0859199	0.459453	0.41853	1.28668	0.256661	0.341936
Npb	0.103427	0.459165	0.372876	1.58925	0.207434	0.294986
Fam221a	0.201285	0.459096	0.249446	3.50119	0.0613246	0.133566
Mettl18	0.176364	0.45879	0.31691	2.18186	0.139646	0.226666
Nosip	0.566688	0.458657	0.135325	12.2898	0.000455432	0.00380103
Bcdin3d	0.310351	0.458381	0.178968	7.83236	0.0051319	0.0237286
Mis18bp1	0.48364	0.457328	0.219517	4.8918	0.0269846	0.0769436
Rhoq	0.125971	0.457033	0.329826	1.99203	0.158128	0.246214
A330008L17Rik	0.0529789	0.456943	0.818073	0.309406	0.578045	0.616249
Arl6ip1	7.58698	0.456888	0.0866532	28.3619	1.00624e-07	4.11399e-06
Atp1a1	1.43513	0.45627	0.105325	19.3997	1.06026e-05	0.00019006
Gm49980	0.976981	0.455998	0.189802	5.88478	0.0152723	0.0518674
Rfc4	1.45561	0.455642	0.118085	17.1708	3.41652e-05	0.000490637
Wwtr1	0.712011	0.455268	0.176388	6.82584	0.00898484	0.0355845
Klf3	0.373748	0.454849	0.211583	4.63522	0.0313222	0.0855485
Marchf3	0.247892	0.454568	0.263528	2.9857	0.0840028	0.163604
Cftr	0.173136	0.453505	0.339691	1.78441	0.181609	0.270455
Rac2	3.06429	0.453006	0.18432	6.07236	0.0137313	0.048062
Acpp	0.140425	0.452259	0.357359	1.61044	0.204429	0.292278
Aoc1l2	0.0761701	0.450682	0.506216	0.816831	0.366108	0.436003
Nek2	0.290035	0.450551	0.239892	3.64079	0.0563801	0.126253
Mecom	0.287407	0.450512	0.347605	1.71473
Orc6	2.07372	0.450507	0.109826	18.4927	1.70558e-05	0.000280656
C330011M18Rik	0.109712	0.450223	0.363956	1.99517	0.157802	0.245886
Pltp	1.28959	0.450183	0.170709	6.93962	0.00843072	0.0339475
Ivd	0.358293	0.449915	0.170691	7.91421	0.00490479	0.0229581
Zbtb6	0.259801	0.4499	0.199368	5.99345	0.0143591	0.049622
AV099323	0.223298	0.449891	0.238207	3.74132	0.0530824	0.12153
Zfp414	0.41809	0.449064	0.160164	8.73389	0.0031235	0.0164858
Cenpi	0.371684	0.447896	0.194447	6.46165	0.0110227	0.0409835
Pim3	0.562535	0.447137	0.141708	11.2929	0.000778032	0.00575138
Alyref	7.10477	0.446714	0.0682014	44.899	2.07464e-11	2.6254e-09
Hmox2	1.27612	0.446209	0.0996071	21.9071	2.86171e-06	6.67104e-05
Prim1	1.02455	0.446074	0.142826	10.9401	0.000941027	0.00669233
Plekhh3	0.174294	0.446045	0.265368	2.87179	0.0901445	0.171052
Pglyrp1	1.51335	0.445902	0.123244	13.438	0.000246572	0.00236772
Gm21814	0.252183	0.445802	0.22598	4.58239	0.0323022	0.0875056
Adck5	0.252641	0.445568	0.199128	5.95202	0.0147004	0.0504407
Bckdha	0.269489	0.445446	0.20518	4.99864	0.0253672	0.0740597
Tbc1d31	0.250118	0.445279	0.216235	4.54399	0.0330346	0.0889232
Bora	0.451966	0.445268	0.201519	5.28415	0.0215204	0.0663079
Mllt11	1.22908	0.444648	0.105081	19.9266	8.04723e-06	0.000154687
H1f5	1.67526	0.444301	0.246372	3.30369	0.0691244	0.144275
Pag1	0.121352	0.443917	0.377986	1.45132	0.228316	0.315522
Gbp4	0.842763	0.443598	0.155071	8.99402	0.00270864	0.0147959
Foxc1	0.354472	0.443204	0.202521	4.94466	0.0261715	0.0756191
Myo16	0.0513902	0.442974	0.645393	0.537453	0.46349	0.519445
Chaf1a	0.514786	0.442592	0.163848	8.61146	0.00334054	0.0173135
Coprs	0.274207	0.442586	0.202232	5.63872	0.017568	0.0573726
Rad51	0.919698	0.442514	0.156748	8.98645	0.00271988	0.0148497
Ctf1	0.287915	0.442493	0.199655	5.55066	0.0184737	0.0592741
Il23a	3.89928	0.442295	0.0969395	21.2341	4.06466e-06	8.87214e-05
Stk17b	0.158755	0.442218	0.270682	2.9005	0.0885521	0.169118
Il7	2.3989	0.442108	0.127285	12.2101	0.000475316	0.00392588
Depdc1a	0.495637	0.441503	0.198882	5.44556	0.0196181	0.0619181
Gmnn	2.52266	0.441342	0.126119	12.9526	0.000319485	0.00291513
Msmo1	0.49308	0.440908	0.173707	6.85949	0.00881717	0.0351555
Tubb2a	0.716088	0.440669	0.152835	8.62769	0.00331091	0.0172095
H2bc7	0.120804	0.440658	0.368694	1.4864	0.222776	0.310124
Krt222	0.265835	0.437342	0.268231	2.84341	0.0917495	0.173479
Rps6ka1	0.188849	0.437312	0.244719	3.58408	0.0583357	0.129162
Atg4d	0.417731	0.436851	0.162307	8.07505	0.00448789	0.0215476
Fras1	0.10397	0.436828	0.429792	1.05419	0.304544	0.384022
2810408A11Rik	0.116647	0.436645	0.329676	1.86562	0.171977	0.260342
1500011B03Rik	0.85568	0.43556	0.119441	14.2778	0.000157716	0.0016552
Tafa5	0.15414	0.435135	0.307499	2.10236	0.147072	0.23439
Samd9l	0.171622	0.434168	0.309696	1.97212	0.160223	0.24838
Ccl27a	1.20622	0.433987	0.134786	10.3828	0.00127196	0.00840107
Ccdc18	0.528209	0.433284	0.168499	7.21987	0.00721011	0.0305596
Slc37a1	0.22427	0.432614	0.225487	3.97186	0.0462667	0.110746
Prokr2	0.976939	0.432249	0.264989	2.703	0.10016	0.183316
5730403I07Rik	0.149272	0.431392	0.314628	1.97276	0.160155	0.248343
Kin	0.777896	0.431075	0.120722	14.4007	0.000147747	0.00157453
Mtap	0.873274	0.430934	0.117261	17.3834	3.05484e-05	0.000446057
Lsm3	3.39739	0.430864	0.0853596	27.4986	1.57209e-07	6.05484e-06
Nde1	1.01242	0.430856	0.120648	13.9758	0.000185183	0.00187475
Ube2t	0.560823	0.430218	0.16387	8.68082	0.00321577	0.0168808
Por	0.363899	0.430207	0.183726	5.90002	0.0151407	0.0515853
Lxn	2.17764	0.429715	0.105953	17.1406	3.47124e-05	0.000495202
Fblim1	0.236101	0.429618	0.256293	2.91087	0.0879844	0.168411
Pvt1	1.37345	0.429207	0.164779	7.00358	0.00813471	0.0331564
Apex1	2.07988	0.429088	0.0968709	21.7683	3.07648e-06	7.01781e-05
Gna14	0.190858	0.428873	0.333244	1.67269	0.195899	0.283591
Batf	0.369486	0.427867	0.184676	5.8439	0.0156311	0.0527153
Bnip5	0.285019	0.427777	0.241945	3.16997	0.0750039	0.151634
Spryd7	1.33826	0.427715	0.0965939	20.7084	5.34799e-06	0.00011235
Eef1e1	2.14499	0.427157	0.0852774	29.085	6.92727e-08	3.00559e-06
Trp53i13	0.297983	0.426281	0.192243	5.60667	0.0178922	0.0580464
Blvrb	0.331579	0.426271	0.210744	4.2149	0.0400703	0.101175
Caprin2	0.220905	0.425399	0.277029	2.42982	0.119047	0.204636
Toe1	0.312872	0.425185	0.175531	7.45169	0.00633767	0.0276899
Ska3	0.184398	0.425033	0.266534	2.7249	0.0987945	0.181827
Lmbr1l	0.404712	0.425032	0.166197	6.75893	0.00932794	0.0364813
Tcf19	0.589625	0.424926	0.186649	5.84279	0.015641	0.0527319
Cxcl9	5.56655	0.424924	0.169088	6.3325
Fbxo46	0.29123	0.424657	0.19034	6.01526	0.0141827	0.0492549
Aqp3	0.132855	0.424027	0.491372	0.744145	0.388336	0.454677
Spdl1	0.729374	0.423466	0.137031	11.6074	0.000656914	0.00505282
Zfp157	0.242337	0.423414	0.22455	3.77117	0.0521431	0.12
Nuf2	0.632456	0.423291	0.167002	7.33478	0.00676329	0.0291068
Ephx2	0.282906	0.422841	0.208405	4.54707	0.0329751	0.088813
Gm57459	0.51616	0.422277	0.213011	3.97112	0.0462869	0.110746
Osbpl3	0.11819	0.421682	0.356276	1.44949	0.22861	0.315752
Gltp	1.71031	0.420952	0.0917159	23.9532	9.87061e-07	2.73241e-05
Mns1	1.02693	0.42074	0.136273	10.8642	0.000980398	0.0069031
Cenph	0.695913	0.420301	0.160935	8.0685	0.00450414	0.021606
Smyd5	0.352738	0.4183	0.193036	4.89923	0.0268687	0.0767163
Csgalnact1	0.449607	0.418199	0.333216	1.57729	0.209152	0.296714
Kctd5	0.716458	0.417768	0.120065	14.4432	0.000144448	0.00154787
Oprm1	0.355714	0.417755	0.195236	5.07582	0.0242617	0.0717791
Tinagl1	0.224243	0.41773	0.274711	2.39122	0.122018	0.207887
Tfcp2l1	0.195532	0.417268	0.340511	1.52247	0.217246	0.30503
Nanp	0.308124	0.417228	0.181138	6.24566	0.0124498	0.0448767
Phlpp2	0.282134	0.416028	0.232714	3.37899	0.0660326	0.139826
Cenpw	1.7087	0.415826	0.112454	14.6731	0.000127857	0.00140402
Igfbp7	0.0967571	0.415598	0.707934	0.344251	0.557385	0.598667
Chpt1	0.723993	0.415233	0.129856	11.7884	0.000596013	0.00467919
Rpp40	0.389035	0.414882	0.17378	6.42303	0.011265	0.0416002
Lin9	0.406482	0.414275	0.185293	5.50929	0.0189158	0.0602181
Shld2	0.336251	0.414168	0.210877	4.25449	0.0391467	0.0997443
Tnfrsf11b	2.11402	0.414069	0.182287	5.24296	0.0220357	0.0671944
Psat1	0.62553	0.413884	0.141686	10.141	0.00145011	0.00926539
Trim65	1.27642	0.41381	0.140094	9.14753	0.00249054	0.0139047
Umps	0.879174	0.413401	0.124831	13.3339	0.000260652	0.00246945
Rnf181	2.05602	0.413368	0.0876283	24.5626	7.19357e-07	2.13597e-05
Rnf5	1.32945	0.412727	0.093676	21.6537	3.26576e-06	7.30843e-05
Slc7a11	1.1526	0.412467	0.201625	4.25141	0.0392177	0.0998525
Nup43	0.643172	0.411758	0.136184	12.2671	0.000461016	0.0038353
Cpt2	0.338469	0.411665	0.178521	5.88119	0.0153034	0.0519233
Cfap299	0.271419	0.411497	0.323377	1.72535	0.189006	0.277788
Cd79b	0.379968	0.411227	0.202771	4.26652	0.0388705	0.0993621
Rpf2	1.40823	0.411158	0.0922515	23.9655	9.80773e-07	2.72209e-05
Prxl2a	0.411843	0.411143	0.178861	5.56399	0.0183336	0.05897
Gm47547	0.338854	0.411001	0.227028	3.41619	0.0645598	0.138014
Tmem50b	0.831454	0.410741	0.134733	10.4528	0.00122464	0.0081566
Trp53cor1	0.158638	0.410258	0.384843	1.17188	0.279015	0.361249
Cenpm	1.13919	0.410101	0.138017	10.0334	0.0015373	0.00968433
Nxnl2	0.144572	0.409428	0.308452	1.78458	0.181588	0.270455
Fbxo30	0.439762	0.409319	0.195445	4.67288	0.0306424	0.0842501
Gfpt2	0.103592	0.409289	0.510784	0.650161	0.420055	0.482566
H3c3	0.290718	0.40904	0.277472	2.74878	0.0973286	0.18037
Stra8	0.457763	0.408956	0.178711	5.65525	0.0174032	0.0569744
Nppc	0.409431	0.407515	0.388247	1.12865
Cenpk	1.04842	0.4072	0.141682	9.25953	0.00234273	0.0132676
Sf3a2	1.07291	0.406557	0.101631	18.0993	2.09676e-05	0.000332665
Ppp2r5a	0.748272	0.406399	0.124577	11.7709	0.000601655	0.00470852
Ddx60	0.11874	0.406147	0.411699	0.973116	0.323904	0.401101
Map2	2.05401	0.40606	0.124468	10.8055	0.00101198	0.00707257
Rccd1	0.23289	0.405905	0.246599	3.33404	0.06786	0.142509
H2ac6	0.749719	0.405486	0.238609	2.93266	0.0868045	0.166942
Gm26670	0.208768	0.404509	0.272974	2.27135	0.131785	0.218069
Thrsp	1.55647	0.404505	0.403423	1.00593
2410018L13Rik	0.544237	0.404174	0.163487	6.9987	0.00815688	0.0332022
Akr1b3	1.6011	0.403983	0.094218	19.7026	9.04766e-06	0.000169027
Ccnb2	1.95185	0.403911	0.156276	6.76828	0.0092792	0.0363618
Cxcl1	0.323002	0.403579	0.443616	0.834681	0.360923	0.431467
Grem2	0.361275	0.403432	0.406152	1.00355	0.316453	0.394757
Pole4	1.92558	0.402637	0.0937214	20.9894	4.61821e-06	9.91749e-05
Mastl	0.300358	0.402632	0.203724	4.36592	0.0366646	0.0953155
S1pr1	0.276394	0.402238	0.242156	2.85994	0.090811	0.171949
Lad1	2.65371	0.401896	0.102051	16.184	5.74788e-05	0.000738814
Cdh3	0.311511	0.401424	0.256131	2.48394	0.115014	0.200425
Armc9	0.276041	0.401354	0.238142	3.06942
Foxq1	0.372355	0.400517	0.236464	2.94868	0.0859476	0.165982
Wdr95	0.105226	0.400242	0.460722	0.846191	0.357632	0.428739
Frat2	0.125029	0.400117	0.416543	0.92058	0.337323	0.412027
Tuba8	0.0793861	0.399532	0.445807	0.813123	0.367199	0.436843
Spata48	0.226885	0.399299	0.235883	2.98789	0.0838896	0.163443
Gm15524	0.127357	0.398694	0.39551	1.05529	0.304292	0.383795
Specc1	0.422781	0.398519	0.220496	3.33397	0.0678628	0.142509
Bnipl	0.24916	0.398479	0.211225	3.72676	0.0535471	0.122268
Gins1	0.491405	0.398104	0.159739	8.0881	0.00445569	0.0214123
Cox5b-ps	0.377856	0.39768	0.160971	7.39391	0.00654452	0.0283952
Gm29863	0.248746	0.397544	0.232078	3.17113	0.0749507	0.151634
Pdgfd	0.0847449	0.397311	0.475655	0.704171	0.401386	0.466055
Mob4	2.74573	0.396979	0.0769269	29.4601	5.70803e-08	2.61536e-06
Gm47861	0.064828	0.396629	0.638053	0.388528	0.533074	0.577788
Kpna2	0.639505	0.396513	0.166534	6.23112	0.0125524	0.0450632
E2f8	0.244625	0.395731	0.263421	2.56847	0.109013	0.193377
Mok	0.355663	0.394798	0.206055	3.97727	0.0461183	0.110569
Elp6	0.425097	0.394685	0.149962	8.65284	0.00326553	0.017041
2700099C18Rik	0.413408	0.394654	0.180285	5.16375	0.023063	0.0691339
Gm6034	0.157599	0.394617	0.323913	1.55112	0.21297	0.300687
Stmn1	21.8769	0.394143	0.0935172	17.8233	2.424e-05	0.000373436
Leo1	0.843191	0.394124	0.111923	14.3249	0.000153814	0.00162368
Atpsckmt	0.719951	0.394123	0.132123	10.1491	0.00144374	0.00924517
Ran	28.2073	0.393803	0.0771118	26.2213	3.04449e-07	1.05074e-05
Gm4117	0.095636	0.393061	0.423886	0.975052	0.323423	0.400745
Pla2g12a	0.900551	0.392143	0.121037	12.4557	0.000416721	0.00355232
Apoa2	0.125514	0.39145	0.352566	1.23721	0.26601	0.350265
Ccl5	0.377141	0.391328	0.315189	1.5434	0.214113	0.301939
H3c7	0.134612	0.390992	0.298246	2.50558	0.113444	0.1987
Cdkn2aip	0.546014	0.390847	0.164619	6.01402	0.0141926	0.0492549
Brip1os	0.91398	0.39078	0.130208	10.5255	0.00117741	0.00792145
Fzd1	0.394564	0.390565	0.18957	4.51704	0.0335588	0.0899454
Anks1b	0.168091	0.390089	0.301079	1.71207	0.190717	0.279169
Atf7ip2	0.0538464	0.389982	0.549775	0.67873	0.410024	0.473499
Nherf1	2.3764	0.389854	0.0891804	20.2765	6.70171e-06	0.000134845
Gtf2b	1.84182	0.389733	0.08282	25.4525	4.53419e-07	1.48303e-05
Nfkbiz	0.465814	0.389448	0.227037	2.9823	0.0841793	0.163888
Yars2	0.525137	0.389435	0.138995	9.93613	0.00162066	0.0100629
Prkab1	0.285806	0.388945	0.192116	4.47884	0.034317	0.0913574
Wipf3	0.248485	0.388646	0.215394	3.65027	0.0560603	0.125828
Slc35f1	0.154912	0.388479	0.437613	0.787995	0.374707	0.442817
Cmc2	1.11784	0.388136	0.105757	16.8418	4.06276e-05	0.000558291
H2bc14	0.108255	0.387811	0.357958	1.50515	0.219881	0.307547
H3c11	0.117424	0.3877	0.348176	1.48976	0.222254	0.309601
Utf1	14.3657	0.387685	0.0857934	20.5712	5.74526e-06	0.000119059
Nle1	0.326642	0.387169	0.176559	5.89288	0.0152022	0.0517283
Cd44	1.09618	0.387005	0.163264	5.79625	0.0160604	0.0537278
Mrps18b	1.2541	0.386807	0.0959844	19.4554	1.02976e-05	0.000186163
Gm13561	0.128872	0.386466	0.324513	1.5813	0.208574	0.296132
Tspan12	0.153503	0.38609	0.372641	1.08867	0.296767	0.37732
Tlcd3a	0.272041	0.385556	0.196057	4.15803	0.0414375	0.103278
Tpx2	2.35765	0.385239	0.143539	7.44346	0.00636672	0.0277597
Haus3	0.604435	0.385153	0.139043	9.32132	0.00226503	0.0129517
Mtrf1	0.208185	0.385009	0.221713	3.8497	0.0497548	0.116841
Srm	2.8383	0.384976	0.0908275	19.7505	8.82387e-06	0.000167056
Ranbp1	16.1793	0.384616	0.0741908	27.2767	1.76323e-07	6.62301e-06
Abraxas1	0.228276	0.384482	0.220546	3.57106	0.0587947	0.129915
Epb41	0.899326	0.38424	0.143298	7.4501	0.00634331	0.0276917
Haus1	0.695603	0.384051	0.121663	13.3405	0.000259742	0.00246743
Cpne4	0.482451	0.38373	0.242478	2.65608	0.103155	0.186676
9330179D12Rik	0.130128	0.383202	0.310583	1.73275	0.188061	0.277035
Cep70	0.401806	0.383134	0.171009	6.191	0.0128402	0.0456797
Cdc20b	0.126269	0.383027	2.48389	0.0237147
Dennd3	0.127978	0.382965	0.358946	1.16858	0.279694	0.361696
Trib1	0.320986	0.382834	0.214336	3.41726	0.0645181	0.137993
Pop7	1.29319	0.382345	0.09439	19.0945	1.24401e-05	0.000217456
Psmb9	5.39945	0.382341	0.0757004	26.1538	3.15277e-07	1.08459e-05
Lpcat4	0.392642	0.3822	0.164906	5.96682	0.0145776	0.0502299
Gm33302	0.0829024	0.382112	0.507326	0.588964	0.44282	0.502476
Rad54b	0.370694	0.382098	0.185183	4.82168	0.028104	0.0791701
Gm26885	0.360578	0.382085	0.340757	1.29029	0.255995	0.341348
Smim3	0.744372	0.381261	0.156195	6.57549	0.0103392	0.0391822
Ehf	1.73992	0.380945	0.114604	11.5998	0.000659606	0.00506986
Rpp25l	1.17203	0.380851	0.108071	14.4885	0.000141018	0.0015203
D030056L22Rik	0.857385	0.380471	0.114201	14.1285	0.000170738	0.00175697
1810062O18Rik	0.140627	0.380324	0.287281	2.10396	0.146918	0.234179
Gm35546	0.0607588	0.380058	0.53591	0.552842	0.457159	0.514189
Melk	1.42822	0.379393	0.131244	9.63092	0.00191329	0.011394
Palld	0.68107	0.379108	0.186756	4.11649	0.0424672	0.104911
Knstrn	1.16592	0.378742	0.144975	7.13145	0.00757436	0.0315753
Gm14164	0.729394	0.378735	0.117072	11.5043	0.000694342	0.00525328
Asrgl1	0.652535	0.378722	0.1444	8.08621	0.00446034	0.021425
Gemin6	0.672694	0.378093	0.135403	10.8626	0.000981267	0.00690329
Gnb1l	0.359228	0.377402	0.191692	4.93003	0.0263939	0.075896
Procr	0.133144	0.377276	0.395554	1.06178	0.30281	0.382789
C630043F03Rik	0.176943	0.376641	0.271659	2.09748	0.147542	0.234857
Gprasp2	0.225338	0.376466	0.266182	2.39392	0.121808	0.207669
Pde12	0.349072	0.376369	0.174459	5.81178	0.0159191	0.0533987
Pacsin1	0.134038	0.375521	0.405232	0.924907	0.33619	0.410912
Acyp1	0.502219	0.37535	0.162485	5.51255	0.0188805	0.0601842
Cxcl2	1.85682	0.374322	0.328475	1.29966
9430091E24Rik	0.129117	0.374215	0.367837	1.09355	0.295686	0.376423
Hk2	0.239946	0.374164	0.281922	1.82127	0.177162	0.265656
Rnf113a2	0.253904	0.373315	0.222342	3.20231	0.0735343	0.149716
9530059O14Rik	0.265348	0.372994	0.300706	1.56393	0.211091	0.298717
Flywch2	0.320358	0.37273	0.187866	4.19694	0.0404971	0.101815
Anxa2	2.09453	0.372509	0.187493	3.93829	0.0471988	0.112092
Gm17092	0.344488	0.372389	0.217675	3.38731	0.0657002	0.139428
Prmt1	8.36786	0.371765	0.0680982	31.2343	2.28693e-08	1.15733e-06
Slc66a2	0.563479	0.371628	0.150558	6.4515	0.0110859	0.0411463
Bcl2l15	0.574609	0.370854	0.219225	2.91249	0.0878963	0.168319
Kctd13	1.29551	0.370808	0.102622	15.6897	7.46299e-05	0.000908338
Cdc25c	0.889879	0.370714	0.129236	9.3428	0.00223864	0.0128215
Cbr1	0.614484	0.370697	0.145	7.0953	0.00772862	0.0320293
Lockd	2.23451	0.370614	0.11791	10.2334	0.00137922	0.00892455
Peds1	0.445194	0.370505	0.165405	5.6583	0.017373	0.0569131
Frg1	1.66455	0.369848	0.0927734	18.0681	2.13144e-05	0.000336419
Rgma	0.120383	0.369814	0.401516	0.873282	0.350048	0.421945
Mrps12	2.01093	0.369772	0.0766049	26.6727	2.41001e-07	8.60763e-06
Ppa1	3.80099	0.369172	0.0771451	24.8079	6.33363e-07	1.95149e-05
Kdm4d	0.134093	0.368942	0.338525	1.34898	0.245457	0.331708
Chtf18	0.276543	0.367806	0.209399	3.55852	0.0592404	0.130675
Crhbp	1.43466	0.367764	0.23205	2.53977	0.111011	0.195761
Utp11	1.56425	0.367146	0.0874331	20.5103	5.93127e-06	0.000122664
Oard1	1.52236	0.366524	0.0885485	21.2988	3.9297e-06	8.65823e-05
Bub1	0.771892	0.366386	0.160882	6.56278	0.0104133	0.0393928
Nup37	1.16052	0.366358	0.109998	13.4221	0.000248675	0.00238187
Lrrc4	0.176852	0.366221	0.280843	1.87502	0.170902	0.259339
Ly6i	0.379605	0.365988	0.256219	2.04107	0.153102	0.240929
Msx3	0.145655	0.365935	0.399965	0.844083	0.358232	0.429264
Magohb	1.62162	0.365924	0.0831079	24.4087	7.79141e-07	2.25675e-05
Dtx3	0.743416	0.36591	0.13193	8.0198	0.00462687	0.0220501
Pcdh8	0.221898	0.365769	0.274305	2.07009	0.150212	0.237825
Cox6b2	0.344067	0.365757	0.237809	2.45515	0.11714	0.20257
Snap29	0.476449	0.365038	0.14636	7.93721	0.00484284	0.0227684
Lcn2	0.149163	0.36419	1.4008	0.0677594
Cds1	0.300153	0.364108	0.209147	3.03875	0.0812984	0.160097
Iqgap3	0.451305	0.364032	0.188752	4.22089	0.0399292	0.101038
H2az1	64.4643	0.363881	0.0853127	18.1956	1.99334e-05	0.000318635
Itsn1	0.307619	0.363747	0.210579	3.29945	0.0693031	0.144421
Fxyd3	1.63086	0.363071	0.155689	5.42521	0.019848	0.06244
Tyms	3.27663	0.362919	0.13767	7.23712	0.00714113	0.0303641
Chchd4	1.36537	0.362667	0.0963008	17.131	3.48886e-05	0.000496355
Pnpla2	3.88836	0.362438	0.0731224	26.3895	2.79058e-07	9.66248e-06
Rpp30	1.06229	0.361868	0.112719	13.9401	0.000188733	0.00189984
Gcat	1.88996	0.361632	0.0996691	14.5268	0.000138181	0.00149732
Zwilch	0.693396	0.361262	0.141066	8.29147	0.00398318	0.0196388
Rnf24	0.345671	0.361252	0.2135	3.04441	0.0810157	0.159777
Rnf126	1.47112	0.361227	0.0874669	19.2218	1.16378e-05	0.000204818
Sfn	3.23	0.360769	0.113182	10.3362	0.00130446	0.00857011
H2-DMb1	2.97401	0.360492	0.081493	20.4068	6.26067e-06	0.000128477
2310009B15Rik	0.66468	0.360261	0.133629	8.8018	0.00300934	0.016014
Hmox1	0.230951	0.36002	0.324598	1.24647	0.264227	0.34881
Mfap5	0.113494	0.359296	0.481982	0.632365	0.426489	0.48869
2410002F23Rik	1.02581	0.358988	0.106874	12.2785	0.00045821	0.00381905
Cryl1	1.35168	0.358356	0.125212	8.65011	0.00327041	0.0170581
Nectin4	0.25906	0.358229	0.219979	2.82859	0.0925998	0.174581
Tmem74b	0.276049	0.358187	0.236914	2.4693	0.11609	0.20169
Zcrb1	4.68311	0.358117	0.0617606	37.4733	9.26729e-10	7.57779e-08
Wtip	0.297112	0.358076	0.20263	3.43126	0.0639733	0.137186
Calm2	13.2138	0.357834	0.0735891	24.0176	9.54607e-07	2.66937e-05
Lbhd2	0.618394	0.35769	0.184876	3.97117	0.0462856	0.110746
Tex30	1.17084	0.357674	0.114383	12.6143	0.00038281	0.0033003
Pafah2	0.190319	0.357559	0.263221	2.05856	0.151353	0.239025
Mapk6	0.655435	0.356823	0.14429	6.84048	0.00891151	0.0353732
E2f1	0.621451	0.356587	0.189541	3.91025	0.0479924	0.113495
A930016O22Rik	0.179603	0.355679	0.291507	1.50266	0.220262	0.307716
Mmp20	0.0503142	0.355678	0.732403	0.295794	0.586531	0.623233
Ccdc34	3.00924	0.35519	0.0944287	15.0956	0.000102203	0.0011651
Pbld1	0.200167	0.355159	0.875667	0.166999
Dynlt2a2	0.206267	0.354895	0.240852	2.22014	0.136221	0.222842
Gm11639	0.0743965	0.353931	0.722011	0.243055	0.622008	0.654389
Tkt	6.72597	0.353522	0.0888748	16.0885	6.04485e-05	0.000771389
Hmgn2	14.6536	0.352784	0.0780599	20.7276	5.29478e-06	0.000111674
Plk2	0.241376	0.352633	0.300616	1.37261	0.241365	0.328222
Dynll1	25.1838	0.352436	0.0794815	19.7272	8.93214e-06	0.000167458
Klrg1	0.0892982	0.35243	0.462461	0.600393	0.438428	0.498501
Kif24	0.411668	0.352413	0.178253	4.56997	0.0325372	0.0879183
Dynlt1a	0.375145	0.352288	0.173091	5.53374	0.0186532	0.0596699
Trf	0.225092	0.352231	0.350807	1.04217
Pdcd2l	0.737551	0.352026	0.119799	10.3595	0.00128814	0.00847332
Impa2	0.578828	0.351922	0.155014	6.44858	0.0111041	0.0411487
Haus5	0.524045	0.351904	0.154709	6.23628	0.0125159	0.0449778
Mrpl47	0.526648	0.351447	0.139051	8.01753	0.00463267	0.0220633
H2az2	4.66526	0.351066	0.0828993	18.7511	1.48939e-05	0.000250113
Alg11	0.354139	0.35057	0.180747	4.04566	0.044285	0.107772
H1f4	0.739227	0.349323	0.196326	3.44069	0.0636091	0.136765
Timeless	0.415333	0.348807	0.207061	3.50106	0.0613297	0.133566
Tagap	0.135541	0.348675	0.325483	1.52134	0.217416	0.305052
Cyth2	1.30774	0.348254	0.0957604	15.8619	6.81361e-05	0.000843856
Pdzd2	0.318188	0.348163	0.224798	2.4652	0.116393	0.201869
Wdr53	0.61217	0.348096	0.158853	5.32041	0.021077	0.0653014
Abhd15	0.151826	0.346891	0.290561	1.59319	0.20687	0.294511
Hnrnpl	4.30274	0.346749	0.0614463	36.7709	1.3286e-09	1.03846e-07
Terf1	0.828157	0.346376	0.141442	6.54129	0.0105399	0.0396738
Mfsd5	0.194285	0.344806	0.238919	2.30391	0.129049	0.215385
Lpcat1	0.706695	0.344629	0.126969	9.25532	0.00234812	0.0132839
Tceal9	2.98937	0.344438	0.101198	12.19	0.000480456	0.00395604
2310010J17Rik	0.216947	0.344402	0.230272	2.24411	0.134124	0.220498
Sel1l3	0.407363	0.344186	0.186473	4.0425	0.0443679	0.107925
Espl1	0.156442	0.344167	0.299452	1.39092	0.23825	0.325257
Tmem167	4.82175	0.344052	0.0615927	35.0079	3.28372e-09	2.18162e-07
Myef2	2.05415	0.343877	0.0885192	17.6854	2.60621e-05	0.000395207
Ppif	0.923139	0.343622	0.112464	11.069	0.000877835	0.00633495
Gm56852	0.102353	0.34285	0.406444	0.71994	0.396163	0.461453
Xlr4b	0.0409062	0.342824	0.840648	0.176405	0.674481	0.699145
A630072M18Rik	0.359535	0.342799	0.197469	3.13298	0.0767236	0.154114
E130308A19Rik	0.243461	0.342729	0.243569	2.1359	0.143886	0.231323
Gm15614	0.25667	0.342038	0.244979	2.11629	0.145739	0.233034
Mta3	0.590432	0.341981	0.134788	6.92637	0.0084934	0.034135
Irf2bp1	0.561692	0.341404	0.137672	7.11902	0.00762702	0.0317444
Slc4a7	0.39833	0.341238	0.186407	3.77391	0.0520577	0.119923
Limd2	1.09104	0.340875	0.121455	9.02483	0.00266337	0.0146162
Rrp36	1.07977	0.340643	0.0991765	13.73	0.00021106	0.00208704
Slc38a1	2.0444	0.340182	0.108065	10.9517	0.000935199	0.00666745
Mras	4.79089	0.33988	0.0767509	20.6867	5.40891e-06	0.000113406
Gm57301	0.0836039	0.339524	0.469412	0.533842	0.464996	0.52058
Slfn9	0.679255	0.339177	0.220748	2.55807	0.109732	0.194377
Calhm6	0.220016	0.338861	0.289728	1.53212	0.215794	0.303592
Gadd45g	10.5625	0.33871	0.113399	8.95855	0.00276174	0.0150165
Hspd1	20.0506	0.33844	0.0731152	21.7363	3.12812e-06	7.11167e-05
Ncapg	0.496003	0.338155	0.168403	4.58514	0.0322503	0.0874321
Slc7a5	1.44399	0.337703	0.122499	7.91552	0.00490125	0.0229517
Pappa2	0.179392	0.337429	0.343719	1.04053	0.307698	0.387172
Pfdn4	2.53891	0.337238	0.0771536	22.217	2.4351e-06	5.82023e-05
Ppat	0.661264	0.337178	0.135122	8.13306	0.00434653	0.0210112
Gm6209	0.117468	0.336844	0.426811	0.693423	0.405002	0.469331
Ddx39b	7.07038	0.33676	0.0615167	32.1302	1.44178e-08	7.77976e-07
Cks2	6.07852	0.33649	0.126559	7.16356	0.00743993	0.0311855
Manf	13.961	0.336129	0.0762262	19.6847	9.1331e-06	0.000169946
Gm16740	0.231947	0.334973	0.222636	2.49752	0.114026	0.199358
Serpina12	0.713359	0.334699	0.166192	4.25099	0.0392275	0.0998536
Lpcat2	0.193519	0.334531	0.2876	1.40248	0.236309	0.323456
Ckap2	0.555448	0.333378	0.196049	2.95148	0.0857988	0.165847
Cc2d2a	0.186905	0.333292	0.268894	1.63922	0.200432	0.288152
Polr2d	1.22458	0.333052	0.0914765	17.6148	2.70468e-05	0.000405512
Krt18	21.345	0.33301	0.0907078	13.477	0.00024151	0.00232963
Zwint	1.80898	0.332994	0.0867613	18.773	1.47239e-05	0.000248043
Izumo4	0.509761	0.332745	0.153923	5.3347	0.0209049	0.0649195
Rad18	0.734886	0.332649	0.142843	7.24042	0.00712802	0.0303205
Psmd12	3.13775	0.332524	0.0676601	29.4412	5.76392e-08	2.62963e-06
1110002J07Rik	0.139866	0.332111	0.351982	0.937311	0.33297	0.409056
Prdx1	21.8061	0.33206	0.0627047	28.3682	1.00299e-07	4.11399e-06
Arf6	1.37787	0.33175	0.0954883	14.0727	0.000175881	0.00180291
Cnnm2	0.520507	0.330992	0.174951	3.71056	0.0540691	0.122847
Adtrp	1.03507	0.330821	0.176547	3.58458	0.0583181	0.12915
Dscaml1	1.08745	0.330521	0.159097	4.61614	0.0316724	0.0863055
Ppp2r3c	0.981602	0.330135	0.110197	9.898	0.00165459	0.0102139
2300009A05Rik	0.986111	0.330115	0.121191	8.41871	0.0037138	0.0186391
Irgm2	0.0770031	0.330082	0.494951	0.452372	0.501211	0.550684
Arc	0.138136	0.32986	0.424942	0.614471	0.433109	0.494284
Fam136a	1.4154	0.329604	0.096647	15.1511	9.92407e-05	0.00114046
Mrpl17	3.80675	0.329368	0.0692923	25.4403	4.56297e-07	1.4847e-05
Naa10	3.0161	0.329333	0.0725696	23.6532	1.15354e-06	3.09649e-05
Mrpl18	6.35246	0.329094	0.0677579	25.9142	3.56935e-07	1.2161e-05
Traf4	0.751092	0.329057	0.127346	8.13892	0.0043325	0.0209624
Cse1l	0.931785	0.328973	0.109426	12.0049	0.000530595	0.00426643
Pdyn	0.47915	0.328752	0.218188	2.3496	0.125315	0.211076
H2bc15	0.148098	0.328332	0.28625	2.2842	0.130697	0.217013
Derl3	0.317295	0.327881	0.231028	2.28856	0.130331	0.21664
Clca3b	0.275068	0.327607	0.295696	1.35981	0.243571	0.330243
Timm17a	3.51057	0.327131	0.0637239	31.9648	1.56994e-08	8.38615e-07
A430005L14Rik	0.811141	0.327001	0.127984	8.24284	0.0040913	0.0200509
Snrpd3	7.94107	0.326938	0.061651	30.2321	3.83308e-08	1.86053e-06
Sap30bp	0.775978	0.32673	0.112832	10.0463	0.00152653	0.00964743
Slc2a6	0.946207	0.326373	0.138601	5.93622	0.0148328	0.0507941
Asb13	0.245607	0.326081	0.276558	1.48926
Selenoh	7.73192	0.325057	0.0760333	18.9362	1.35166e-05	0.000231371
Tbx21	0.452004	0.324302	0.222455	2.16732	0.140971	0.228051
Slc26a10	0.182036	0.324136	0.255344	2.0698	0.150241	0.237836
Gm20275	0.599872	0.324134	0.222738	2.11157	0.146189	0.233457
Dlgap5	0.632437	0.323938	0.166387	4.26286	0.0389542	0.0994543
Dcakd	0.891133	0.323859	0.112843	11.008	0.000907176	0.00649379
Pip4k2c	0.383113	0.323758	0.159672	5.44917	0.0195776	0.0618091
Ska2	0.695792	0.323021	0.144604	6.40856	0.0113571	0.0418885
Med30	3.57881	0.32277	0.0720671	23.6884	1.13264e-06	3.06362e-05
Fmnl3	0.360915	0.322745	0.221823	2.22802	0.135527	0.221981
Eif2b4	1.08039	0.322711	0.101275	10.9398	0.000941208	0.00669233
Fam110b	0.284891	0.322393	0.256061	1.59633	0.206424	0.294108
Coq3	0.734697	0.321935	0.121368	9.0772	0.00258816	0.0143143
Crip3	4.44432	0.321872	0.215843	2.22299	0.13597	0.222499
Plat	0.245036	0.321764	0.375876	0.755269	0.384813	0.451647
Nme5	0.0970589	0.32151	0.581001	0.317325	0.57322	0.612087
Brix1	2.06428	0.321453	0.0795806	20.3988	6.287e-06	0.000128768
Incenp	0.992312	0.321324	0.159159	4.69986	0.0301651	0.083417
Uchl3	4.13537	0.321025	0.0654694	28.4686	9.52301e-08	3.95839e-06
Hspa2	0.274413	0.321008	0.216058	2.40405	0.121021	0.206793
Slc31a1	0.724464	0.320677	0.130119	6.85492	0.00883975	0.0351865
Pa2g4	8.71522	0.320141	0.0692588	22.6663	1.92717e-06	4.86598e-05
Pla1a	1.06741	0.31994	0.131795	6.44183	0.0111464	0.0412699
Nfe2l2	0.96594	0.319726	0.130748	6.13381	0.0132621	0.0467116
Trip13	0.43653	0.319708	0.176918	5.31558	0.0211355	0.065394
Nudt14	2.59455	0.319623	0.0767221	20.1295	7.23701e-06	0.000143258
Osbpl1a	0.157937	0.319534	0.315381	1.07001	0.300944	0.381246
Mbd2	1.11754	0.319511	0.120774	7.83572	0.00512238	0.023695
Mx1	0.117113	0.319436	0.357026	1.00147	0.316954	0.395078
Cacna1d	0.214213	0.318788	0.295667	1.22104	0.269156	0.352803
Hells	2.22795	0.318718	0.143784	5.19569	0.0226429	0.0683014
Fam3c	0.535429	0.318562	0.14676	6.04005	0.0139849	0.0487569
Dscc1	0.38514	0.318058	0.210167	3.24004	0.0718589	0.147463
Pkmyt1	0.359395	0.317753	0.189347	3.72709	0.0535367	0.122268
Xaf1	0.52356	0.317605	0.210376	2.30112	0.129281	0.21557
Prrc1	0.346534	0.317139	0.181721	3.17042	0.074983	0.151634
Lacc1	1.31289	0.317073	0.1117	9.58099	0.00196602	0.0116558
Mipol1	0.864199	0.316997	0.119072	8.85803	0.00291802	0.0156581
Timm50	1.81884	0.316605	0.0864491	16.6376	4.52439e-05	0.000608789
Mep1a	0.106168	0.316426	0.441034	0.573639	0.448816	0.507005
Wdr74	0.915489	0.316261	0.107462	10.7005	0.00107107	0.00736924
Lsr	2.51353	0.316117	0.0744881	19.7187	8.97214e-06	0.000167912
Eri1	0.844543	0.316066	0.125068	8.86447	0.00290775	0.0156317
Smco4	0.810158	0.315849	0.120345	9.26732	0.00233279	0.0132395
B3gnt2	0.723062	0.315841	0.1338	6.60677	0.0101592	0.0386621
Mob3b	0.134653	0.315503	0.461604	0.503022	0.478175	0.531084
Crb3	0.93405	0.315442	0.110339	9.5551	0.00199395	0.0117558
Snhg5	1.08991	0.315406	0.164545	3.77487	0.0520278	0.119923
Osmr	0.311333	0.31519	0.227681	1.93778	0.16391	0.252532
Lingo1	0.358353	0.315109	0.223788	2.22947	0.1354	0.221895
Elapor1	0.975762	0.314998	0.1547	4.4071	0.0357897	0.0940065
Adam19	0.336698	0.31497	0.275058	1.48273	0.223347	0.310554
Fdxacb1	0.172837	0.314966	0.248061	2.04135	0.153074	0.24092
Med6	0.780795	0.314782	0.110927	10.5383	0.00116925	0.00788479
Mpzl1	0.519737	0.314659	0.145163	5.57994	0.0181673	0.0586631
Siglec15	0.391254	0.314633	0.272416	1.50892	0.219304	0.30702
Gm15491	0.195107	0.314476	0.248218	1.81428	0.177996	0.266455
Mrpl53	3.46407	0.313544	0.0681231	24.6375	6.91931e-07	2.07189e-05
Fen1	1.35328	0.313439	0.123499	7.99506	0.00469051	0.0222689
Dsg4	0.120938	0.312939	0.320853	1.08491	0.297601	0.377951
Eloc	7.13215	0.312778	0.0578269	31.823	1.68878e-08	8.97588e-07
Mgme1	0.44032	0.312468	0.152617	6.05925	0.0138337	0.0483614
4931414P19Rik	0.195181	0.312383	0.261677	1.55502	0.212396	0.300195
Lig1	1.78377	0.31192	0.145881	5.0104	0.0251954	0.0737723
Mgst1	0.767001	0.311837	0.182228	2.95928	0.085386	0.165268
Nudcd2	2.30821	0.311491	0.0837235	16.6213	4.56359e-05	0.000613286
Med10	6.19525	0.311002	0.0797005	15.8118	6.99643e-05	0.000859778
Tmem9	0.594622	0.310937	0.13212	6.22065	0.0126269	0.045178
Icam5	0.198389	0.310909	0.236729	2.44041	0.118245	0.203884
Trp53i11	0.274696	0.310754	0.216921	2.20502	0.137562	0.224381
Skp1	4.30815	0.31044	0.0638506	26.6703	2.41305e-07	8.60763e-06
Coq7	1.50688	0.309957	0.0900018	16.119	5.9485e-05	0.000760006
8030451A03Rik	0.287097	0.309923	0.242921	1.761	0.1845	0.273152
Ocln	0.486295	0.309729	0.157306	4.38597	0.036236	0.0946445
Cdca7	0.466183	0.309238	0.187958	3.59307	0.0580208	0.128673
Ttc32	0.654643	0.309172	0.130286	7.53152	0.00606288	0.0268759
Marchf9	0.320115	0.309114	0.186544	3.0035	0.0830849	0.162411
Dancr	0.351356	0.308725	0.216162	2.21747	0.136457	0.223105
Hirip3	1.19073	0.308659	0.135899	6.4864	0.0108703	0.040583
Paics	2.52503	0.308281	0.0902845	13.8753	0.000195344	0.00195897
Pcyox1	0.301211	0.307349	0.202562	2.50482	0.113499	0.198711
Nop16	1.34952	0.307273	0.0938885	13.6016	0.000225988	0.0022243
Dbi	6.04539	0.307006	0.074804	17.4302	2.98049e-05	0.000437605
Dhfr	0.833967	0.306892	0.167219	4.20906	0.0402086	0.10138
Alg8	0.676413	0.306798	0.126612	7.12483	0.00760237	0.0316666
Gm47271	0.0848471	0.306579	0.40231	0.783782	0.375987	0.443931
Aspm	1.38363	0.306365	0.162382	3.81806	0.050703	0.118222
Net1	0.793721	0.306255	0.140308	5.7341	0.0166386	0.0551678
Jpt1	7.62376	0.306252	0.0658479	22.494	2.10799e-06	5.2233e-05
Lsm2	3.96943	0.30625	0.0793467	17.187	3.38755e-05	0.000487276
Epha7	0.124114	0.306247	0.51758	0.350421	0.553875	0.595686
B3galt6	0.477914	0.306129	0.145952	4.91194	0.0266717	0.0762972
Ccne2	0.7995	0.30602	0.212727	2.3316	0.126772	0.212654
Smc2	2.93145	0.305848	0.117033	7.37875	0.0065999	0.0285655
Zfp110	0.345475	0.305641	0.180649	3.55483	0.0593723	0.13078
H2bc24	0.12809	0.305624	0.35442	0.745426	0.387928	0.45425
Arhgef2	0.556295	0.304857	0.142336	4.84766	0.0276837	0.0783602
Stub1	2.93056	0.304808	0.0728327	20.8037	5.08842e-06	0.000107535
Fcf1	2.44573	0.304708	0.0723012	21.2967	3.93408e-06	8.65823e-05
Rac3	1.4909	0.30454	0.109408	8.35835	0.00383919	0.0190799
Tsg101	2.74575	0.304501	0.0690449	24.748	6.53352e-07	1.98432e-05
Mrto4	3.01991	0.304384	0.0746848	19.465	1.0246e-05	0.000185546
Mrps6	2.27946	0.304166	0.0896648	12.7357	0.000358744	0.0031379
Rfesd	0.409937	0.303866	0.15845	4.25899	0.0390431	0.0996124
Lin37	0.575501	0.303741	0.13478	6.20652	0.0127281	0.045372
Vps36	2.26798	0.303721	0.0761884	18.3041	1.883e-05	0.000303737
Nup35	0.847539	0.303721	0.122018	8.51816	0.00351619	0.0179267
Nrep	1.52719	0.303537	0.127884	6.13892	0.0132238	0.0466234
Igkc	2.50864	0.303455	0.26923	1.26586
Arhgap10	0.469666	0.303029	0.180761	3.21539	0.0729488	0.148924
H2ac24	1.19462	0.30297	0.216397	2.06187	0.151024	0.238684
Sf3a3	1.59494	0.302721	0.0855353	17.0769	3.58967e-05	0.000505406
Nme7	0.377157	0.302569	0.167983	3.66683	0.0555056	0.124829
Nubp1	2.01971	0.302552	0.0823355	17.2929	3.20382e-05	0.000465254
Cdca4	0.385336	0.302362	0.172172	5.13452	0.0234545	0.0699948
Anp32e	4.18788	0.302183	0.0781711	16.9089	3.92181e-05	0.000541414
Ccdc57	0.222059	0.302167	0.27236	1.34715	0.245777	0.332097
Grap	0.749277	0.302118	0.164322	3.49774	0.0614528	0.133697
Uap1	3.57561	0.301602	0.0853485	13.9563	0.000187113	0.00188711
Magoh	4.34457	0.301322	0.0667276	23.4401	1.28862e-06	3.44171e-05
Galt	0.916287	0.300777	0.11255	7.85546	0.00506676	0.0235195
Mad2l1	1.55934	0.300623	0.107001	10.1585	0.00143641	0.00920378
Mrps35	1.41403	0.300558	0.0858358	15.9733	6.42416e-05	0.000808132
Proser3	0.161221	0.300518	0.267223	1.38205	0.239752	0.326571
Pfas	0.374279	0.300204	0.17354	3.61499	0.0572611	0.127618
Dck	0.451981	0.299778	0.194026	3.15071	0.0758938	0.153055
Styxl1	0.0964537	0.299585	0.381114	0.80314	0.370156	0.439372
Cd83	0.234475	0.299137	0.265664	1.48288	0.223324	0.310554
Adam10	1.97808	0.299072	0.0836093	14.8617	0.000115686	0.00129446
Tgds	0.494155	0.298863	0.140474	5.62259	0.0177304	0.0577265
Chrna9	0.276429	0.298752	0.42718	0.487946	0.484845	0.536809
Smndc1	1.57117	0.298499	0.0884333	14.77	0.00012145	0.00134761
Aimp2	1.31708	0.298188	0.0922409	14.0676	0.000176352	0.00180599
Alg3	0.40719	0.297355	0.161984	4.83587	0.0278736	0.0787144
Ddah2	0.751097	0.297114	0.149342	4.45521	0.034795	0.0921682
Prr15l	0.08724	0.296573	0.493295	0.361754	0.547534	0.590113
Abi3bp	0.426727	0.296536	0.25433	1.40702	0.235551	0.322752
Qrsl1	0.330038	0.29651	0.176649	3.50857	0.0610522	0.133234
Stard5	0.183763	0.296277	0.321224	0.951064	0.329449	0.406128
Cgas	0.426604	0.296243	0.19216	3.29493	0.069494	0.14464
Gpr132	0.738095	0.296185	0.157088	3.84572	0.0498732	0.11698
Polr3d	0.722499	0.296126	0.133091	5.93863	0.0148125	0.0507435
Scamp3	1.2431	0.296035	0.0947343	13.0537	0.000302681	0.00279539
Txndc12	0.719595	0.295978	0.122957	6.62049	0.0100812	0.0384236
Cbr3	0.168662	0.295647	0.293734	1.25938	0.261769	0.346623
Cep44	0.47683	0.295364	0.156123	4.40016	0.0359355	0.0943197
S100a10	4.20731	0.294942	0.120602	6.00026	0.0143037	0.049479
Grhl1	0.157489	0.294749	0.289962	1.09983	0.294304	0.375339
Homer3	0.217173	0.29467	0.234178	1.84924	0.173872	0.262173
3300002A11Rik	0.100072	0.294542	0.431599	0.538155	0.463198	0.519325
A230083N12Rik	0.0905528	0.294537	0.467254	0.416655	0.518611	0.565651
Top2a	5.40963	0.294406	0.157739	3.52357	0.0605022	0.132523
Nup205	0.538678	0.294027	0.159338	4.11214	0.0425763	0.105082
Tars2	0.434081	0.293816	0.150799	4.70708	0.0300386	0.0831538
Rad51ap2	0.068416	0.29316	0.536513	0.305655	0.580359	0.618282
Tomm40	2.67728	0.293111	0.0739349	19.058	1.26802e-05	0.000220246
Trmt61b	0.227224	0.293035	0.220192	2.37759	0.123087	0.209046
Fdft1	0.675778	0.292945	0.128293	6.76742	0.00928372	0.0363618
Cep295	0.733217	0.292912	0.137821	5.32724	0.0209946	0.0651028
Zdhhc12	0.872075	0.292863	0.108948	8.81725	0.00298395	0.0159377
Zfp750	0.333622	0.292716	0.261945	1.27362	0.259089	0.344221
Hgh1	0.386242	0.292451	0.169244	4.25365	0.0391662	0.0997691
Pde4a	0.16971	0.292435	0.275836	1.19127	0.275073	0.357767
4930578M01Rik	0.252514	0.292389	0.245813	1.60304	0.205474	0.293257
Rnaset2b	0.785505	0.292058	0.124409	6.18137	0.0129103	0.0458398
Smim20	1.47725	0.292037	0.0918443	12.7159	0.000362563	0.00315906
Map3k15	0.183369	0.29193	0.281794	1.19337	0.27465	0.357402
Cdc6	0.388443	0.291494	0.259439	1.45433	0.227834	0.31502
Gtpbp1	1.20703	0.291445	0.149527	3.91414	0.0478816	0.113334
Ssu72	3.39845	0.291279	0.0651213	23.8453	1.04398e-06	2.84551e-05
Twf2	1.52566	0.291156	0.0917543	11.6981	0.000625645	0.00485446
Cdkn1a	1.53195	0.290949	0.233642	1.57407
Sema3b	0.303308	0.290746	0.201007	2.37375	0.12339	0.209314
Mrps5	3.1702	0.290639	0.0760041	17.0494	3.64208e-05	0.000510757
4930579C12Rik	0.23624	0.290327	0.261677	1.27062	0.25965	0.344795
Ubl4a	2.06644	0.29007	0.0784809	17.4863	2.89384e-05	0.000429466
Gm11520	0.236212	0.29002	0.262765	1.60284	0.205501	0.293257
H4c9	1.17258	0.289977	0.133343	5.02734	0.0249502	0.0732451
Fyb	0.240653	0.289899	0.230422	1.75816	0.184854	0.273562
Stard3nl	1.88148	0.289832	0.0885575	13.5234	0.000235612	0.00229355
Bach2	0.368859	0.289737	0.233439	1.68903	0.193728	0.281769
Atp2a3	0.408732	0.289733	0.178857	3.37463	0.0662073	0.14014
Cox15	0.307178	0.289666	0.179707	3.83424	0.0502157	0.117498
Pcid2	0.557112	0.289417	0.133007	6.95387	0.00836382	0.0337923
Mrnip	0.246875	0.289331	0.20651	2.55614	0.109867	0.194472
Prorsd1	0.543372	0.288927	0.145404	4.61616	0.0316721	0.0863055
Smim22	0.568257	0.288666	0.173759	2.90493	0.0883089	0.168866
Dcaf4	0.313722	0.28845	0.181957	3.3541	0.0670379	0.141392
Olfm1	0.165563	0.288329	0.34049	0.787552	0.374841	0.442828
Traf3ip2	0.234786	0.288269	0.208417	2.19326	0.138616	0.225648
Nsun6	0.491681	0.288197	0.170164	3.43877	0.0636833	0.136822
Mtx1	2.66369	0.288029	0.0756355	17.3085	3.17762e-05	0.00046208
H4c4	0.861754	0.287787	0.190361	2.72995	0.0984824	0.181457
Sf3b4	1.19222	0.287643	0.093735	12.1465	0.000491811	0.00401532
Prepl	0.224418	0.287609	0.219042	1.92013	0.165843	0.254168
Spag5	0.324969	0.287342	0.229707	1.65476	0.198312	0.285763
Aldh5a1	0.248491	0.2873	0.210613	2.86189	0.0907007	0.171771
Ptpn23	0.257424	0.287297	0.226511	1.69822	0.192521	0.280743
Ubald2	2.86371	0.287123	0.0809949	14.3978	0.000147973	0.00157453
Mrpl42	3.84536	0.286916	0.0658692	22.4287	2.18093e-06	5.35598e-05
Trim11	0.365052	0.286628	0.166849	3.45421	0.0630907	0.136204
Hyal1	0.153335	0.286594	0.280525	1.10951	0.292188	0.373754
AI506816	2.84442	0.286536	0.0831007	13.7517	0.000208637	0.00207272
1810014B01Rik	0.258481	0.286237	0.197716	3.34518	0.067402	0.141973
Kif20b	0.906055	0.285742	0.155328	3.78887	0.0515945	0.119308
H1f0	7.39965	0.285644	0.0887565	10.6589	0.00109541	0.00746903
Fkbp3	4.64485	0.285337	0.0714924	18.3107	1.87651e-05	0.000303611
Cit	0.399224	0.285268	0.204591	2.34324	0.125827	0.21157
Pla2g4a	4.35799	0.285176	0.0997788	8.46639	0.00361769	0.0182837
Ube2i	8.65542	0.285164	0.0541378	30.725	2.97308e-08	1.46314e-06
Ezh2	3.03996	0.284467	0.0883182	11.6462	0.000643345	0.00496281
Mrpl40	1.80857	0.284083	0.082671	15.6626	7.57081e-05	0.000917648
Mrps17	2.11	0.283898	0.0779865	17.5027	2.86906e-05	0.000427144
Trmt10c	0.595753	0.283758	0.129613	6.52862	0.0106152	0.039901
Dusp4	1.17387	0.28354	0.120976	5.90587	0.0150905	0.0514471
Rad1	0.557052	0.283394	0.133361	6.80939	0.00906798	0.0357938
Kif4	0.651369	0.28333	0.172881	3.43819	0.0637056	0.136834
Hmbs	1.53095	0.283313	0.0919825	12.3955	0.000430367	0.00363368
Krt16	0.764792	0.282883	0.201613	2.18093	0.13973	0.226723
Isoc1	0.932873	0.282694	0.122263	7.18709	0.007343	0.0309133
Os9	1.44105	0.282642	0.0920506	11.2645	0.00079005	0.00582401
Rabggta	0.612494	0.282491	0.128181	6.99145	0.00818999	0.0332924
Fam210b	0.502273	0.282429	0.163779	3.71031	0.0540774	0.122847
Mcm5	1.13646	0.281877	0.133213	5.29888	0.0213392	0.065872
Plxdc1	0.322651	0.28173	0.358139	0.668495	0.413577	0.476773
Paqr7	0.165174	0.281351	0.273152	1.14006	0.28564	0.367597
Arl4c	0.222722	0.281046	0.262445	1.15718	0.28205	0.363991
Runx2	0.119347	0.281041	0.410032	0.561542	0.45364	0.51115
C1galt1c1	0.632706	0.280764	0.125036	5.93134	0.0148739	0.0509047
Gm43672	0.169747	0.280706	0.271147	1.15611	0.282274	0.364191
Cdpf1	0.540629	0.2805	0.137503	5.1879	0.0227447	0.0684917
Dbf4	0.698428	0.280459	0.147995	4.73567	0.0295433	0.0821462
Tnfaip8l1	0.648976	0.279982	0.172724	2.7685	0.0961362	0.178748
Dnajc10	1.07999	0.278961	0.1006	10.2075	0.00139869	0.00901093
Gpsm3	0.22538	0.278733	0.243526	1.72975	0.188442	0.277371
Gm39556	0.257641	0.278724	0.281729	0.977541	0.322807	0.400634
H2bc11	0.219065	0.278534	0.255382	1.30987	0.252418	0.337807
Creb3l2	0.693716	0.278504	0.142268	4.22443	0.0398459	0.100992
Cep83os	0.259361	0.278485	0.204143	2.20383	0.137668	0.224484
Dpcd	2.19225	0.278263	0.0801315	13.0207	0.000308064	0.00283526
Lrrc43	0.250635	0.278073	0.85454	0.106221	0.744488	0.760294
Asf1b	0.62971	0.278047	0.174563	3.52324	0.0605142	0.132523
Ptcd2	0.636425	0.278044	0.122957	7.85816	0.00505917	0.0234945
Ddx55	0.379746	0.277914	0.170356	3.6065	0.057554	0.127965
Mrpl12	3.8276	0.277792	0.0677586	20.3465	6.46115e-06	0.000131323
Tuba1a	14.1403	0.277548	0.0893836	9.72198	0.00182077	0.010997
Wdr3	0.4688	0.277524	0.155452	4.07701	0.0434705	0.106546
Bbof1	0.169094	0.277409	0.376529	0.545684	0.460087	0.516771
Selenos	2.67129	0.27721	0.0840134	12.2667	0.000461101	0.0038353
Mphosph10	1.6106	0.277151	0.0922145	12.4076	0.000427579	0.00361588
B4galnt1	1.31948	0.277024	0.0997706	9.0405	0.00264063	0.0145289
Pam16	4.10882	0.276997	0.0652864	20.8223	5.03939e-06	0.000106924
Mpped2	0.171532	0.276986	0.367789	0.586542	0.443759	0.503271
Zbtb7b	0.176626	0.276792	0.258897	1.14585	0.284419	0.366291
Snrpd1	10.456	0.276728	0.0668693	18.1212	2.07281e-05	0.000329357
Drg1	1.82206	0.276623	0.091802	11.4557	0.000712762	0.00535075
Tap1	2.20429	0.276459	0.0892802	10.252	0.00136536	0.00887149
Adrm1	1.87037	0.27642	0.079402	14.5221	0.000138525	0.00149951
Eif4a3	2.67466	0.276393	0.0752007	17.3855	3.05153e-05	0.000446057
Slc39a7	0.82833	0.276393	0.115172	6.57892	0.0103194	0.0391208
Trmt9b	0.267596	0.276272	0.254701	1.28634	0.256724	0.341977
Lsmem2	0.32473	0.275988	0.209516	2.00618	0.15666	0.244896
Ly6g	0.0869447	0.275909	1.47532	0.034958
Csnk1e	0.623423	0.275629	0.143406	4.59815	0.0320064	0.0869477
Scmh1	0.421702	0.275504	0.231643	1.45028	0.228484	0.315713
Entpd3	0.104288	0.275455	0.533318	0.267474	0.605031	0.639313
Dcps	1.31894	0.275249	0.0940258	11.9952	0.00053338	0.00427267
Asf1a	1.33581	0.275188	0.0988649	9.46775	0.00209116	0.0122003
Cdc23	1.16576	0.275118	0.11038	7.61331	0.0057939	0.0260199
Elf3	1.02778	0.274992	0.145135	3.78495	0.0517154	0.119482
Atp6v0b	6.25487	0.274948	0.0786338	12.7966	0.000347253	0.00306904
Coq2	1.20432	0.27492	0.0943	11.4238	0.00072511	0.0054243
Ddit3	0.526269	0.274888	0.185119	2.2033	0.137716	0.224527
Hmgb1	46.2865	0.274785	0.0688393	16.0085	6.30587e-05	0.000795153
Far1	2.98551	0.274243	0.0882165	11.0295	0.000896757	0.00643221
Mrpl2	1.19436	0.27414	0.101546	8.86387	0.0029087	0.0156317
Lrrc57	0.297813	0.274091	0.18304	3.26797	0.0706449	0.14593
Tdp1	0.657724	0.273908	0.143577	5.08595	0.0241204	0.0714674
Msantd3	0.300329	0.273715	0.198361	2.59	0.10754	0.191675
Nxpe3	0.854433	0.273667	0.228766	1.48885	0.222395	0.309745
Casp8	1.01752	0.273376	0.111369	8.62673	0.00331266	0.0172095
Fbxo7	0.776996	0.272693	0.123931	5.9562	0.0146656	0.0503865
Tmem98	1.13197	0.272483	0.110637	7.566	0.00594796	0.0264658
Ddost	3.96406	0.272467	0.0619823	22.8274	1.77221e-06	4.50684e-05
Frmd4b	0.122544	0.272152	0.470843	0.340064	0.559792	0.600585
Cdc34	1.3418	0.271621	0.0953003	10.1272	0.00146096	0.00931614
Sp6	0.0901734	0.271113	0.405384	0.479777	0.488523	0.539757
Dus1l	0.494072	0.270839	0.139587	5.03427	0.0248505	0.0730201
Brf2	0.176663	0.270585	0.251582	1.2978	0.254616	0.340022
Scpep1	0.657556	0.270406	0.137957	5.28215	0.0215451	0.0663328
Cd70	2.64143	0.270345	0.10958	6.66387	0.00983868	0.0377859
Nfkbib	1.52054	0.270167	0.0876155	10.8657	0.000979639	0.0069031
Gm47438	0.145294	0.270138	0.333661	0.730809	0.392621	0.458271
Rcl1	0.94767	0.270126	0.107791	8.65304	0.00326517	0.017041
Bik	1.3843	0.270002	0.116858	5.60634	0.0178957	0.0580464
Fkbp15	0.912503	0.269971	0.138088	4.26572	0.0388887	0.0993718
Fads2	0.236337	0.269708	0.233327	1.3902	0.238372	0.325286
Clpp	1.69935	0.269405	0.0861366	11.648	0.000642725	0.00496163
Nelfe	1.21407	0.269322	0.10428	8.92503	0.00281288	0.01524
Erc2	0.12307	0.268938	0.420816	0.459137	0.498027	0.547866
Id3	2.23167	0.268877	0.176138	2.33593	0.126419	0.21233
Gxylt2	0.25027	0.268718	0.257096	1.19798	0.273726	0.35668
Nsmce4a	2.52895	0.268699	0.075968	16.6696	4.44878e-05	0.000600807
Ttll9	0.152582	0.268563	0.355233	0.623657	0.429692	0.4913
Rhob	3.13108	0.268067	0.13599	3.94916	0.0468949	0.111722
Oasl1	0.35378	0.268064	0.385778	0.491187	0.483398	0.535709
Pml	0.672382	0.267939	0.132918	4.22017	0.0399462	0.101038
Rnf150	0.273622	0.267717	0.300528	0.799777	0.37116	0.439798
Dimt1	0.931714	0.267706	0.105865	9.13188	0.00251194	0.0140094
Rae1	1.05898	0.267206	0.098079	10.1171	0.00146898	0.00935606
Snrnp40	2.07248	0.267187	0.0748977	18.4363	1.75683e-05	0.000287752
Nptx2	0.812262	0.267137	0.191355	2.05289	0.151918	0.239704
Pigyl	1.6138	0.266893	0.0875254	11.7544	0.00060699	0.00473738
Slc45a4	0.217074	0.266845	0.240399	1.25997	0.261657	0.346574
Zfp60	0.257309	0.266772	0.193652	3.4334	0.0638904	0.13712
Fam110a	0.525401	0.266757	0.170158	2.63714	0.104391	0.188141
Plscr1	2.03993	0.266112	0.133146	4.23385	0.0396254	0.100623
Tdh	3.57395	0.266088	0.0886118	9.64405	0.00189966	0.0113382
Fancl	0.5835	0.266075	0.136018	6.74066	0.00942399	0.0367001
Thy1	0.199558	0.265961	0.380574	0.513709	0.473538	0.527255
Arl16	0.351667	0.265906	0.168199	3.27991	0.0701326	0.145267
Ccdc71	0.395264	0.265687	0.158345	3.87145	0.0491142	0.115736
Pfdn2	4.39214	0.265662	0.0575745	25.98	3.44969e-07	1.17911e-05
Nhej1	0.230987	0.265642	0.219525	1.92731	0.165053	0.253525
Ccnq	0.43065	0.265587	0.152049	3.50945	0.0610196	0.133191
Hnrnpab	10.217	0.265363	0.0623526	19.8613	8.32695e-06	0.0001592
Plac9	0.549544	0.265347	0.182778	2.25856	0.132877	0.219194
Sae1	3.57546	0.265301	0.0682138	19.4947	1.00877e-05	0.000183889
H2ac20	0.183896	0.265197	0.289506	1.38479	0.239287	0.326189
Fzr1	0.77497	0.264875	0.13041	5.11289	0.0237487	0.0706347
Dnph1	1.54863	0.263993	0.118717	6.03187	0.0140498	0.0489209
Dusp19	0.486236	0.263477	0.145762	5.01015	0.0251992	0.0737723
Pdxp	0.246739	0.26331	0.225689	2.23488	0.134927	0.221505
Kcnab1	0.151565	0.263052	0.279346	1.24116	0.265247	0.349737
S100z	0.123123	0.262891	0.349342	0.757139	0.384225	0.451202
Parpbp	0.322413	0.262304	0.225269	1.62729	0.202078	0.289813
Necap1	0.367716	0.262137	0.164215	3.9822	0.0459836	0.110365
Ube2w	1.45812	0.262029	0.0962982	9.2428	0.00236423	0.0133411
Gm2296	0.870435	0.261928	0.134799	4.50871	0.0337226	0.0901814
Cycs	11.6436	0.261922	0.059889	20.2713	6.72027e-06	0.000134845
Lifr	0.91847	0.261699	0.170987	2.339	0.126171	0.212006
Ifi30	20.1969	0.261644	0.0961141	7.45046	0.00634203	0.0276917
Mmp15	0.243178	0.26135	0.234584	1.26308	0.26107	0.346074
Dhrs4	2.29273	0.260806	0.0754052	14.8658	0.00011544	0.00129416
Nhp2	3.86756	0.260588	0.0729442	15.3628	8.87195e-05	0.00104324
Cggbp1	2.25215	0.260421	0.0813405	14.0099	0.000181851	0.0018463
Mcm8	0.315868	0.260331	0.190446	2.73368	0.0982529	0.181288
Eif4a1	21.0737	0.260136	0.0613669	18.3369	1.85086e-05	0.000299919
1500009L16Rik	1.19328	0.259863	0.122091	6.01406	0.0141924	0.0492549
2700038G22Rik	0.374684	0.259731	0.167232	3.43588	0.0637947	0.13697
Pacc1	1.01452	0.25968	0.10774	7.88245	0.00499169	0.0232625
Il12rb2	0.0605094	0.259539	0.544424	0.244419	0.621033	0.653492
Plpp2	0.316716	0.259519	0.187087	2.37576	0.123232	0.209226
Oas1a	0.459547	0.259213	0.175034	2.312	0.128379	0.214772
Marcksl1	18.508	0.25884	0.0652883	16.0001	6.33378e-05	0.000797727
Prelid3b	3.20398	0.258601	0.0714753	16.6916	4.39762e-05	0.000595499
Cdk10	0.319011	0.258541	0.184685	2.1088	0.146454	0.233621
Tubgcp2	0.723998	0.258475	0.129564	5.5639	0.0183345	0.05897
Egfros	0.168073	0.258179	0.289395	0.934024	0.33382	0.409572
Ciao3	0.282754	0.258061	0.189266	2.23149	0.135223	0.221688
H3f3b	102.871	0.257847	0.0665777	15.0173	0.000106532	0.001206
Myh10	0.151244	0.257692	0.287997	0.952237	0.32915	0.405948
Ilf2	3.03684	0.25737	0.0653216	20.3836	6.33705e-06	0.000129544
Mndal	3.48337	0.257141	0.0886133	8.93734	0.002794	0.0151454
Gng7	0.244277	0.256908	0.724341	0.127033
Zfp511	0.920156	0.256659	0.107527	7.86952	0.0050275	0.0234074
Il27ra	0.167761	0.256642	0.273818	1.108	0.292518	0.373789
Tbrg4	0.344576	0.25644	0.174139	2.45537	0.117123	0.20257
Zfp938	0.439729	0.256242	0.157896	3.17466	0.0747889	0.151481
Btbd2	0.616013	0.25619	0.127312	5.51085	0.0188989	0.0601842
Blm	0.43713	0.256163	0.174369	2.9025	0.088442	0.168974
Cdk2ap2	2.30306	0.256138	0.0863144	10.3096	0.00132341	0.00867312
Sugp2	0.288251	0.256099	0.223132	1.65148	0.198758	0.286171
Prdx4	3.02241	0.255983	0.0818865	11.5001	0.000695911	0.0052614
Ptpn22	0.904238	0.255933	0.171837	2.30018	0.129359	0.215602
Gm49442	0.217841	0.255829	0.259638	1.06575	0.301908	0.382001
Cyb561	0.647519	0.255747	0.130614	4.50872	0.0337224	0.0901814
Cdk4	9.27962	0.255735	0.0739912	12.5842	0.000389029	0.00334403
Hspe1	32.7941	0.255678	0.0693431	13.7099	0.000213326	0.00210553
Adgrg2	0.255691	0.255599	0.279079	0.838374	0.359862	0.43049
Siah1b	0.222618	0.255349	0.229898	1.98079	0.159307	0.247498
Thap7	0.622806	0.255341	0.129987	5.65305	0.017425	0.0570107
Rhbdd1	0.35654	0.255251	0.181737	2.14633	0.142911	0.230243
Cep55	0.531342	0.255155	0.190277	2.14109	0.1434	0.230717
Sac3d1	0.733174	0.254854	0.121048	6.17775	0.0129367	0.0458695
Ppm1m	0.384049	0.254845	0.171782	2.95309	0.0857135	0.165721
Igf2r	0.532671	0.254686	0.149319	3.97291	0.0462377	0.110746
Gm17753	0.0850725	0.25418	0.482416	0.281217	0.595905	0.631489
Sigmar1	0.846347	0.254139	0.113885	7.01804	0.00806926	0.0329924
Polr1g	0.695076	0.253835	0.136474	4.09034	0.043129	0.106022
Prpf4	0.975559	0.253476	0.121268	6.32859	0.0118807	0.0433397
Polr2c	2.46177	0.253258	0.0690401	19.7433	8.85699e-06	0.000167056
Rsl1d1	3.43176	0.253224	0.0730514	15.6497	7.6226e-05	0.000922873
Vangl2	0.407861	0.253168	0.162329	2.98699	0.0839363	0.163504
Vps39	0.226245	0.253042	0.21782	1.63732	0.200693	0.288449
Actl6a	2.6976	0.252976	0.0728884	16.5597	4.71426e-05	0.000631936
1700086O06Rik	0.168914	0.252907	0.256314	1.47463	0.224616	0.311883
Btbd10	0.737228	0.252868	0.124866	5.1927	0.022682	0.0683417
Tsen34	2.30237	0.252656	0.0806209	12.5486	0.0003965	0.00339458
Ccdc33	0.544893	0.252544	0.17561	2.49485	0.11422	0.199467
Ccng1	1.28756	0.252538	0.121039	4.73471	0.0295599	0.0821709
Secisbp2l	0.511644	0.252251	0.147856	3.37286	0.0662785	0.140235
Serpini1	0.775628	0.251919	0.170152	2.43207	0.118876	0.204408
Cox11	0.526994	0.251868	0.147895	4.08738	0.0432046	0.106139
Mcm4	1.12387	0.251741	0.141966	3.93351	0.047333	0.112335
Tex14	3.70869	0.251722	0.156359	2.60017	0.106852	0.190834
Fbxo44	0.172435	0.251291	0.258432	1.07453	0.299925	0.380182
Dhh	0.179789	0.250961	0.278898	0.966858	0.325465	0.402664
Rcc1	0.984444	0.25093	0.112886	7.58764	0.00587697	0.0262645
Dnajc9	1.58221	0.250527	0.107328	7.53029	0.00606702	0.026883
Traf2	0.881215	0.250478	0.106603	6.76663	0.00928782	0.0363645
Las1l	0.844934	0.250395	0.11997	5.66465	0.0173102	0.0568275
Itfg2	0.553842	0.25026	0.152591	3.14901	0.075973	0.153127
Fbxo45	0.70006	0.25017	0.13062	5.54611	0.0185218	0.0593391
Actr5	0.22156	0.249884	0.219853	1.43824	0.230425	0.317652
Anxa1	1.84688	0.24965	0.188811	1.75566	0.185167	0.273911
Ptrhd1	0.947422	0.24934	0.108508	6.77582	0.0092401	0.0362845
Agpat2	0.45479	0.249184	0.158504	2.82326	0.0929076	0.17486
Cdc26	2.80954	0.24913	0.0687319	17.0927	3.55981e-05	0.000503872
Cnot11	0.509993	0.249117	0.141181	5.55394	0.0184392	0.0591813
Mmaa	0.441666	0.248939	0.15401	4.00435	0.0453829	0.109468
Gm53028	0.223428	0.248805	0.220591	1.92383	0.165435	0.253799
Psmc3ip	1.10853	0.248712	0.118239	6.69651	0.00966016	0.0373138
Cep97	0.276048	0.248677	0.209213	1.89325	0.168836	0.25742
Dmrt2	1.61535	0.248419	0.117534	4.75041	0.0292913	0.0815934
Ciao2b	4.08956	0.24835	0.0626059	19.471	1.02137e-05	0.000185276
Dph7	0.310876	0.248343	0.176216	3.0568	0.0803998	0.158886
Pon3	0.37457	0.248294	0.172945	2.44795	0.117678	0.203171
Bcs1l	0.31784	0.248075	0.185527	1.97298	0.160132	0.248343
Mbd4	0.369223	0.248048	0.18253	2.43344	0.118772	0.204362
Fmn1	0.929571	0.247967	0.152488	2.94314	0.086243	0.166351
Rnf125	0.290232	0.247881	0.194411	2.54205	0.110851	0.195543
Pmpca	0.849244	0.247031	0.108781	8.21938	0.00414454	0.0202487
Pus3	0.246134	0.246639	0.205658	1.62283	0.202697	0.290544
Smyd4	0.169586	0.246423	0.285006	0.931148	0.334565	0.409962
Acot7	1.53357	0.246129	0.094462	8.11297	0.00439496	0.0211779
Mtif3	0.34895	0.245871	0.171993	2.60699	0.106394	0.190387
Gins3	0.383478	0.245715	0.177538	2.78153	0.0953572	0.177571
Adck1	0.289935	0.245678	0.192412	1.96866	0.16059	0.2487
Akip1	0.361902	0.245662	0.175476	3.00185	0.0831696	0.162432
Puf60	2.79865	0.245278	0.0672482	17.6298	2.68351e-05	0.000404047
Gjb2	0.738582	0.245225	0.277911	0.799929	0.371115	0.439794
Cavin3	2.11669	0.245213	0.140762	3.13211	0.0767641	0.154125
Atp6v0e2	0.455258	0.24488	0.162512	2.97297	0.0846664	0.164474
Gm16279	0.12717	0.244751	0.319655	0.783876	0.375958	0.443931
Slbp	3.90865	0.244648	0.109548	5.26092	0.0218095	0.0668112
H2ac22	0.173047	0.244518	0.289725	1.65291	0.198563	0.286045
Sox8	0.20443	0.244408	0.288274	0.865886	0.352097	0.423872
Sap30	0.910605	0.244195	0.125549	6.0318	0.0140504	0.0489209
Fxyd2	1.43643	0.244076	0.223301	1.19659
2200002D01Rik	0.152005	0.243972	0.303552	0.652276	0.4193	0.481934
Aasdhppt	1.17141	0.243915	0.0981578	9.50345	0.00205086	0.0120048
Pstk	0.489092	0.243911	0.145557	3.83753	0.0501173	0.117343
Hsd17b7	0.178362	0.243887	0.27593	1.00703	0.315616	0.394102
Pdzd11	2.09447	0.243869	0.0799697	12.3913	0.000431328	0.0036389
Mrm2	0.234617	0.243851	0.215446	1.74605	0.186374	0.275394
Stau2	1.2728	0.243752	0.113785	5.66867	0.0172705	0.0567498
Nfyb	0.942192	0.243593	0.117669	6.90126	0.00861352	0.0344735
Sra1	2.47615	0.243464	0.0728653	13.7328	0.000210747	0.00208588
Mtm1	0.23791	0.243396	0.292487	0.768618
Wrap53	0.262388	0.243324	0.198785	2.1183	0.145548	0.232886
Tamm41	0.443046	0.243237	0.149178	3.97706	0.0461241	0.110569
Exoc3l2	0.0649768	0.243214	0.933454	0.0740001
Bcl6	0.20968	0.243031	0.294381	0.680158	0.409532	0.472982
Sun2	0.312699	0.242301	0.190435	1.84919	0.173878	0.262173
Snrnp25	4.87645	0.242105	0.0927302	7.24236	0.00712033	0.0302999
Tinf2	0.426163	0.242038	0.164482	3.28465	0.0699305	0.145103
Sh3glb1	9.29614	0.241932	0.05651	20.0081	7.71128e-06	0.000150682
Mtres1	0.513839	0.241818	0.141895	3.84497	0.0498955	0.117005
Pcbp4	3.13066	0.241541	0.0716638	14.319	0.000154304	0.00162723
Gemin2	0.624989	0.241525	0.132826	5.20121	0.0225711	0.0682099
Mrpl14	3.91412	0.241212	0.0651141	15.6186	7.74887e-05	0.000934965
Snu13	6.09743	0.241128	0.0685248	14.4534	0.000143669	0.00154108
Lrfn4	0.311414	0.241091	0.186173	2.19779	0.138209	0.225055
Exosc7	1.19247	0.241082	0.102087	8.96166	0.00275704	0.0150063
Gstp3	0.267239	0.240884	0.287068	0.711119	0.399073	0.463977
Nnat	0.752732	0.240478	0.236685	1.06299	0.302533	0.38253
Calcb	6.1257	0.240473	0.142382	2.88241	0.089552	0.170267
Snrpa	3.48501	0.240366	0.0678225	14.5828	0.00013413	0.00145639
Txndc5	1.18788	0.240277	0.0979955	8.29504	0.00397534	0.0196183
Rfc3	1.2795	0.240263	0.126237	4.96816	0.025818	0.0749237
Yrdc	1.72874	0.240179	0.0842658	12.8789	0.000332312	0.0029928
Supv3l1	0.349328	0.240034	0.173436	2.81353	0.0934725	0.175643
Car13	0.25466	0.240019	0.22134	1.35642	0.244159	0.330752
Gnpnat1	1.02395	0.23938	0.101138	7.59966	0.00583794	0.0261714
H3c6	0.269964	0.239285	0.21828	1.67581	0.195482	0.2832
Nol12	0.782102	0.239231	0.114226	5.61866	0.0177703	0.057799
Bcl2l12	0.748054	0.239071	0.12748	4.56834	0.0325681	0.087957
Hdhd2	1.4051	0.239016	0.0898201	10.6868	0.00107904	0.00739535
Bub1b	0.534492	0.238972	0.172139	2.97422	0.084601	0.164415
U2af1	7.36077	0.238921	0.0636641	15.9711	6.43161e-05	0.000808132
Zhx3	0.156485	0.238716	0.281272	0.795313	0.372498	0.440991
Rrm1	1.25303	0.238646	0.128748	4.83055	0.0279598	0.0788571
Cdca2	0.44525	0.238602	0.208836	1.54209	0.214307	0.302173
Mrpl38	10.873	0.238576	0.0728187	11.0318	0.000895628	0.00642845
Rad54l	0.258119	0.238543	0.204171	2.30874	0.128648	0.21502
Acat2	0.450117	0.238429	0.162363	3.52843	0.0603248	0.132241
Pin1	2.8878	0.237775	0.0688062	16.7003	4.37744e-05	0.000593522
Gm10138	0.302611	0.237693	0.240404	1.05801	0.303669	0.383269
Pacsin3	0.458095	0.237432	0.182822	1.8812	0.170198	0.258586
Adpgk	0.461194	0.23723	0.161527	2.88377	0.0894763	0.17021
Vdac1	8.97688	0.23722	0.0580478	18.5803	1.62892e-05	0.000269852
Angpt1	0.129275	0.237135	0.391752	0.367196	0.544536	0.587419
2810402E24Rik	0.259278	0.236861	0.200428	1.81613	0.177774	0.266236
Zcchc10	0.407345	0.236674	0.16399	2.9538	0.085676	0.165709
Psmc4	4.39428	0.236646	0.0612834	18.8349	1.42533e-05	0.000241647
Fkbp4	5.68481	0.236463	0.071452	12.3	0.000452962	0.00378835
Rrp9	0.878482	0.236414	0.115926	5.74251	0.0165591	0.0550343
H2ac10	0.239932	0.236381	0.282129	0.994226	0.318712	0.396847
Ppil1	1.52212	0.236332	0.0922072	10.4723	0.0012118	0.00809646
Pals2	1.445	0.236316	0.0994148	9.34635	0.0022343	0.0128036
1500004A13Rik	0.209265	0.236271	0.227994	1.54697	0.213583	0.301392
Tomm20	8.05225	0.236054	0.0604489	17.0891	3.56659e-05	0.000503979
Nfkbia	37.033	0.236009	0.0776906	9.25665	0.00234641	0.0132814
Rassf4	1.51968	0.235999	0.115952	5.16772	0.0230104	0.0690632
Ucp2	2.1098	0.235996	0.0921389	7.53823	0.00604033	0.0267983
Mrpl45	1.32804	0.235902	0.0933064	9.10328	0.00255152	0.0141706
D430020J02Rik	0.122326	0.235876	0.30519	0.911916	0.339607	0.413566
Rmnd5b	0.404137	0.235873	0.158717	2.93587	0.0866318	0.166714
Rab25	2.63214	0.235762	0.0948989	6.75304	0.00935883	0.0365482
Rgs2	0.246926	0.235695	0.362243	0.439454	0.507386	0.555803
Rgs10	0.361425	0.235662	0.185482	2.38207	0.122735	0.208681
Rab34	0.392624	0.235571	0.174004	2.39015	0.122102	0.207962
Cxxc1	0.333379	0.235396	0.169718	3.84752	0.0498197	0.116957
Prpf19	2.49232	0.235249	0.0730476	13.7495	0.000208879	0.00207287
Ralgapa2	3.2796	0.235201	0.125663	3.63832	0.0564639	0.12636
Rassf6	1.57965	0.235175	0.109113	5.26168	0.0218	0.0668013
Gm10762	0.256765	0.235065	0.219859	1.25024	0.263507	0.348219
Pcbp1	10.226	0.234989	0.0598707	16.5469	4.74623e-05	0.000633825
Mrpl20	5.23472	0.234873	0.0591786	19.3412	1.09322e-05	0.000194983
Trappc2l	1.75022	0.234541	0.0853204	9.81199	0.00173378	0.0105883
Cbwd1	0.823505	0.234432	0.137318	3.78775	0.051629	0.119308
Cyc1	7.41934	0.234361	0.0674373	13.5421	0.000233276	0.00227841
Emc8	3.57473	0.234112	0.0783394	10.5863	0.0011393	0.00771386
Crybg3	0.42452	0.234021	0.169667	2.45147	0.117415	0.202881
Mrpl13	3.34035	0.233964	0.073858	12.9351	0.000322478	0.00293992
Tecr	5.10616	0.23375	0.0602285	17.282	3.22218e-05	0.000466646
Catsper2	0.253506	0.233728	0.266655	1.02417	0.311532	0.390793
Rbm3	16.2304	0.233715	0.0632274	14.0548	0.00017756	0.00181487
Gsta3	0.118308	0.233671	0.834906	0.0784681
Ccdc144b	0.0481158	0.233486	0.650724	0.193094	0.660354	0.687047
Cdkn2aipnl	0.789764	0.233461	0.116313	6.87333	0.00874917	0.0349244
Yipf1	3.57155	0.233395	0.0759258	10.7907	0.00102013	0.00710628
Ptma	207.141	0.232573	0.064586	12.9714	0.000316279	0.00289333
Rpa2	1.36758	0.23217	0.128031	4.30847	0.0379231	0.097703
Eef1akmt1	1.28447	0.231909	0.0915811	8.54146	0.00347147	0.0177669
Txlng	0.484907	0.231804	0.172888	1.92726	0.165059	0.253525
Lrrc8a	0.243524	0.231802	0.218684	1.28747	0.256514	0.341783
Lrr1	0.213379	0.231768	0.245254	1.71303	0.190593	0.279169
Bysl	0.460917	0.231309	0.146434	4.23076	0.0396977	0.100698
Gm16066	0.30492	0.23085	0.241307	1.01055	0.314771	0.393371
Cenpq	0.890004	0.230809	0.120688	5.93925	0.0148074	0.0507422
Sh3bgrl2	0.981234	0.230758	0.116755	4.87767	0.0272063	0.0773892
Etaa1	0.423381	0.230555	0.163662	2.79388	0.0946251	0.176709
Perp	2.8693	0.230421	0.0958182	5.9494	0.0147223	0.0504996
Asxl3	2.17662	0.230367	0.103001	5.36312	0.0205669	0.0640617
Spata24	0.314962	0.230338	0.19462	1.77431	0.182849	0.271768
Ssna1	3.09808	0.23025	0.0729776	12.7738	0.000351516	0.00308683
Dmap1	0.42623	0.23025	0.154383	2.76821	0.0961534	0.178748
Zfp688	0.294429	0.23015	0.189854	1.50226	0.220324	0.307716
Dtymk	5.6328	0.229939	0.0687385	13.2228	0.000276558	0.00259014
Gucd1	0.322205	0.229923	0.199606	2.1745	0.140315	0.227198
Ndufc2	16.4951	0.229759	0.0733788	9.97436	0.00158735	0.00990232
Phlda3	1.44406	0.229475	0.138206	2.88586	0.0893604	0.170081
Cd2bp2	1.03402	0.229343	0.101129	7.30298	0.00688402	0.029495
Adamts19	0.0923284	0.229285	0.469273	0.240381	0.623931	0.655698
Gimap9	0.385882	0.228963	0.162782	2.94192	0.0863082	0.166382
Farsb	1.10098	0.22895	0.0961489	8.24988	0.00407546	0.0199826
Cisd2	2.54625	0.228715	0.0733253	14.2208	0.000162566	0.00169254
Gstt3	0.406941	0.228648	0.181456	1.76008	0.184615	0.273252
Tram1	1.46111	0.228582	0.0918748	8.56141	0.00343364	0.0176156
Eny2	4.60083	0.228549	0.0641742	15.8097	7.0044e-05	0.000859778
Dohh	1.09911	0.228244	0.0960577	9.21022	0.00240668	0.0135074
Zcchc17	1.45277	0.228207	0.0869348	10.7849	0.00102329	0.0071235
Anln	0.72078	0.227619	0.171366	2.41188	0.120418	0.206001
Crlf3	1.09602	0.227292	0.125247	3.73846	0.0531735	0.12166
Mlx	0.654676	0.22699	0.123322	5.24629	0.0219936	0.0671045
Nup88	0.872985	0.226771	0.109805	6.81775	0.0090256	0.0357164
Adi1	0.45103	0.226579	0.156574	2.70708	0.0999037	0.183131
Git2	0.536373	0.226408	0.174632	1.84983	0.173803	0.262173
Laptm4b	0.355001	0.226382	0.182777	2.34758	0.125478	0.211216
Anapc11	4.73276	0.226366	0.0661953	14.1475	0.000169018	0.00174772
Snrpa1	3.6201	0.226169	0.0719256	13.0249	0.000307382	0.00283143
Gpn3	0.929846	0.226156	0.107811	6.74433	0.0094046	0.0366596
Agfg2	0.288567	0.226108	0.201889	1.54602	0.213723	0.30155
Zfyve19	0.344342	0.225959	0.173342	2.27857	0.131173	0.217428
Tm9sf2	3.36427	0.225817	0.0727877	12.3265	0.00044658	0.00374676
Ero1b	3.59671	0.225773	0.104942	4.8413	0.027786	0.0785336
Pcbd1	0.246289	0.225611	0.295515	0.827463	0.363007	0.433376
Hikeshi	1.76379	0.225395	0.0790063	12.8804	0.00033204	0.0029928
Slain1	0.385672	0.225381	0.177457	1.8592	0.172717	0.26109
Plekhj1	2.5833	0.225182	0.0693614	15.2439	9.44813e-05	0.00110004
Gpcpd1	0.85159	0.224942	0.120499	4.09519	0.0430053	0.10587
Gdi1	1.24408	0.224843	0.0910582	8.60745	0.00334791	0.0173179
Cstf1	0.271759	0.224694	0.188838	2.42716	0.119249	0.20483
Nsmce2	8.48865	0.22462	0.0915076	6.176	0.0129495	0.0458844
Lrrc59	1.99023	0.224589	0.0803077	11.3707	0.000746097	0.00556172
Snhg7	1.41848	0.224504	0.10798	5.0723	0.0243111	0.071865
Sqle	0.933731	0.224487	0.122569	4.51385	0.0336215	0.0900261
Cenpp	1.08737	0.224477	0.142897	3.01749	0.082371	0.161384
Tpbg	0.212137	0.224458	0.231296	1.01028	0.314836	0.393407
Rhog	0.619988	0.224402	0.133887	3.31952	0.0684618	0.143342
Ppwd1	0.701929	0.224241	0.154374	2.62105	0.105455	0.189356
H2ac25	0.819862	0.224027	0.152886	2.35117	0.125189	0.211065
Nudt1	1.07816	0.223911	0.108278	7.33242	0.00677218	0.0291097
Btg3	1.38335	0.223691	0.10103	6.63782	0.00998362	0.0382023
Ppih	1.77779	0.223667	0.0851979	10.2401	0.00137416	0.00890693
Cr2	0.198982	0.223652	0.358109	0.391649	0.531434	0.576384
Sertad1	0.854526	0.223498	0.140323	2.8059	0.0939183	0.175889
Cbx1	5.45921	0.223326	0.0593443	18.4873	1.7104e-05	0.000281013
Slc2a1	0.766548	0.223293	0.163701	2.36532	0.124059	0.209958
Zfp213	0.213378	0.22319	0.218209	2.35833	0.124615	0.210531
Ifnar2	1.37689	0.223182	0.0951206	6.54209	0.0105352	0.0396701
Srsf7	9.22092	0.223075	0.0638242	13.4034	0.000251167	0.00239668
Syne4	0.461233	0.222995	0.163797	2.62746	0.10503	0.188911
Cd24a	1.68705	0.222548	0.170832	1.70911	0.191101	0.279512
Ldhb	4.67106	0.22252	0.0808086	8.05825	0.00452969	0.0217188
Ppp4c	1.48813	0.222516	0.0857036	10.373	0.00127872	0.00842704
Kcnmb2	0.131911	0.222385	0.502458	0.195968	0.657995	0.684996
Timp2	0.545626	0.222268	0.204901	1.20025	0.273271	0.356318
Fhod3	0.0802994	0.222171	0.505906	0.254112	0.614195	0.647515
Tmem161a	0.404448	0.221818	0.154413	2.80134	0.0941854	0.176137
Utp23	0.3429	0.221795	0.184264	2.31029	0.12852	0.214942
Smad4	1.25501	0.221423	0.109551	5.26615	0.0217441	0.0667263
Rims2	0.198426	0.221294	0.341947	0.433522	0.510266	0.558497
Ndufab1	8.66499	0.221214	0.0579049	16.8264	4.09588e-05	0.000561796
Ift140	0.224975	0.221101	0.238493	0.948511	0.330099	0.406505
Pcna	4.03167	0.221069	0.112029	4.21773	0.0400037	0.101127
Cenpe	1.38068	0.22088	0.179748	1.57499	0.209484	0.297097
Hjurp	0.563427	0.220378	0.163086	2.43229	0.118859	0.204408
Auh	0.925206	0.220281	0.109977	6.19836	0.0127869	0.0455359
Tmem65	0.411865	0.220259	0.174084	2.08676	0.148581	0.236051
Tatdn1	0.659412	0.220049	0.135673	3.45089	0.0632176	0.136254
Cdc123	2.20029	0.220043	0.0727462	14.6711	0.000127996	0.00140402
Ganc	0.343201	0.220026	0.188948	1.72097	0.189568	0.27833
Sntb1	0.213036	0.220024	0.322657	0.465852	0.494902	0.545387
Tmem43	0.241117	0.219963	0.21826	1.37014	0.241789	0.328588
Exosc4	1.381	0.219901	0.0853824	9.79571	0.0017492	0.0106678
Arpc1b	3.8943	0.219666	0.0678559	12.8968	0.000329141	0.0029797
Tsc22d1	4.61043	0.219639	0.0842065	7.1046	0.00768863	0.0319383
Tbc1d10b	0.379162	0.2195	0.162188	2.79082	0.0948059	0.176867
Psma3	10.3612	0.219436	0.0556148	17.0873	3.57005e-05	0.000503979
Tmem64	0.478205	0.219239	0.183573	1.50824	0.219408	0.307125
Rpa3	2.52979	0.219196	0.0853227	9.90275	0.00165032	0.0102053
Miip	0.275081	0.21916	0.208013	1.59927	0.206007	0.293743
Mtrfr	0.878993	0.219151	0.119155	4.91956	0.0265543	0.0760842
Slc39a6	0.366415	0.219123	0.172737	3.04455	0.0810084	0.159777
Racgap1	1.50516	0.218848	0.125125	3.64822	0.056129	0.125956
Psmb3	9.82802	0.218812	0.054426	17.7118	2.57027e-05	0.000390315
Noc4l	1.04508	0.218797	0.107895	6.70653	0.00960605	0.0371994
Phyh	1.38384	0.218709	0.109364	5.14895	0.0232604	0.0695523
Chst1	0.264478	0.218612	0.238184	1.01771	0.313062	0.392019
Mtmr4	0.447737	0.218608	0.192274	1.30973
Trim30a	0.309132	0.218555	0.265109	0.687232	0.407107	0.471205
Gm42031	1.05829	0.21851	0.13575	3.25444	0.0712305	0.146797
Rab5if	2.7203	0.218307	0.066084	15.1703	9.82343e-05	0.00113257
Cdc45	0.535497	0.21811	0.176275	3.21309	0.0730514	0.149104
Commd2	1.36917	0.217906	0.0881878	9.07772	0.00258743	0.0143143
Prdx3	5.46926	0.217566	0.0713594	10.4914	0.00119931	0.00803827
Pus1	1.04646	0.217501	0.100961	8.25169	0.00407142	0.0199719
Gemin8	0.239635	0.217293	0.207109	1.87194	0.171253	0.259677
Tnfsf13os	0.446862	0.217209	0.455362	0.23598
Cacng8	0.305949	0.217144	0.273366	0.738214	0.390234	0.456245
Mettl2	0.383072	0.217009	0.163817	2.22928	0.135417	0.221895
Cpne8	0.365364	0.216906	0.211616	1.14921	0.283714	0.365738
Dnai4	0.165462	0.216618	0.28587	0.578622	0.446853	0.505455
Gnai1	0.064345	0.216127	0.578174	0.182512	0.669223	0.694575
Nudt21	2.52001	0.216064	0.0747966	12.7133	0.000363073	0.0031609
Myo1b	0.49604	0.215945	0.210118	1.0879	0.296938	0.377385
Zdhhc3	1.0147	0.215735	0.100448	6.74789	0.00938586	0.0366269
Zfp428	0.7568	0.215649	0.130185	3.80583	0.0510745	0.118594
Dab1	0.0926888	0.21539	0.420734	0.405529	0.524248	0.570044
Cobl	0.406518	0.215051	0.200867	1.23085	0.267242	0.351407
Ifi202b	0.368372	0.214975	0.264027	0.662422	0.415706	0.478561
Ppm1g	2.16101	0.214905	0.0844498	9.53886	0.00201166	0.011834
Plppr3	0.10413	0.214715	0.470397	0.338426	0.560739	0.601297
Gng2	0.495728	0.214704	0.165591	2.3503	0.125259	0.211065
Pop1	0.239406	0.214575	0.212357	2.10988	0.146351	0.233555
Ier2	3.92311	0.214479	0.130343	2.72899	0.0985415	0.181479
Mm2pr	0.188571	0.214437	0.276963	0.766584	0.381276	0.448436
Exosc9	1.10147	0.214391	0.0966871	8.51102	0.00353003	0.0179795
Cnbd2	0.239547	0.214349	0.244582	0.963631	0.326274	0.403343
Fkbp2	4.30235	0.2143	0.0655294	12.7245	0.000360888	0.00314704
Tmem128	2.68837	0.214143	0.073568	11.4809	0.000703169	0.00530496
Sf3b5	5.80374	0.213945	0.0611262	15.0223	0.000106246	0.00120404
Isca2	1.50122	0.213894	0.085404	9.214	0.00240171	0.0134962
Hmgn1	14.9553	0.213878	0.0590997	13.8204	0.00020114	0.00200762
Cinp	1.00785	0.213851	0.112182	6.53801	0.0105593	0.0397117
Trappc1	1.72687	0.213621	0.0822136	10.134	0.00145555	0.00928723
Nip7	1.6069	0.213436	0.0879925	9.24351	0.00236332	0.0133411
Zbtb33	0.26239	0.213396	0.198104	1.84657	0.174182	0.262585
Myl9	0.104919	0.213345	0.562312	0.143532	0.704795	0.725474
Hsp90b1	51.3629	0.213187	0.0778722	7.51453	0.00612032	0.0270178
Polq	0.209875	0.213081	0.250968	1.16189	0.281074	0.36299
Slc25a13	1.80097	0.213044	0.101569	5.59871	0.0179737	0.058206
Cbll1	0.82131	0.212802	0.120977	4.85621	0.0275467	0.0780858
Ankrd26	0.205624	0.212771	0.255766	0.991236	0.31944	0.397524
Brd8	1.5189	0.212758	0.0987129	5.88715	0.0152518	0.0518173
Cip2a	0.468368	0.212633	0.17327	1.87115	0.171343	0.259677
Chek2	0.276948	0.212581	0.195166	2.06356	0.150857	0.238562
Cox19	1.02537	0.212393	0.100794	5.99782	0.0143236	0.0495154
Gm13028	0.616006	0.2116	0.159034	1.81992	0.177323	0.265822
Eif2s2	10.8285	0.211263	0.0594165	13.5428	0.000233181	0.00227841
Syt7	0.30096	0.211224	0.253388	1.01391	0.313969	0.392785
Lmnb1	2.07869	0.211179	0.11103	4.79703	0.0285089	0.0800131
Nme4	0.324212	0.211016	0.186882	2.81837	0.0931912	0.175269
Fkbp7	0.214569	0.210761	0.243503	0.788781	0.374469	0.442607
Wdr75	0.976426	0.210669	0.106815	6.10527	0.013478	0.0473527
Eif2b2	0.937434	0.210471	0.118851	3.96172	0.0465461	0.111188
Eif3l	4.63949	0.210328	0.0610249	14.6693	0.000128119	0.00140402
Endog	0.184825	0.210207	0.245734	0.933357	0.333992	0.409617
Anp32b	15.6452	0.209923	0.0660636	10.5953	0.00113373	0.00768823
Cd1d1	0.87066	0.209674	0.124412	3.3838	0.0658401	0.139613
Kif14	0.195436	0.209609	0.294893	0.785865	0.375353	0.443334
Psmc5	4.47885	0.209454	0.0573124	17.9642	2.25102e-05	0.000350342
Palb2	0.144703	0.209441	0.286908	1.19794	0.273734	0.35668
Stk26	0.751322	0.208907	0.123833	4.77767	0.0288312	0.080609
Dmwd	0.323319	0.208872	0.179563	1.72423	0.189149	0.277887
Nufip1	0.605032	0.208708	0.138827	3.38161	0.0659275	0.139743
Zfp553	0.385601	0.208677	0.16194	2.51314	0.112901	0.198006
Acadm	0.832915	0.208384	0.129471	3.03538	0.0814674	0.160231
Yif1b	2.47822	0.208282	0.0759848	9.93615	0.00162064	0.0100629
Sgms2	0.0772699	0.207987	0.497536	0.181141	0.670394	0.695582
Zranb2	3.11214	0.207899	0.0688284	12.8942	0.000329597	0.0029797
Eps8	0.0775282	0.207745	0.478892	0.188166	0.664447	0.69047
4930599N23Rik	0.152227	0.207405	0.319015	0.426939	0.513495	0.561297
Tefm	0.314149	0.207258	0.181958	1.66358	0.197121	0.284777
Rnf185	0.215605	0.207229	0.232851	1.27695	0.258467	0.343566
Arl6	1.35653	0.207155	0.104477	5.20958	0.0224628	0.068127
Rorb	0.0446319	0.207048	0.823814	0.0671506	0.795532	0.806302
Klhl24	0.672491	0.206931	0.183739	1.51905	0.217763	0.305426
Gm56879	0.138164	0.206777	0.826815	0.0635096
2810004N23Rik	1.84692	0.206683	0.0872782	8.78485	0.00303742	0.0161439
Zfp503	0.265628	0.206277	0.270206	0.670774	0.412782	0.47596
Taf6l	0.253412	0.206197	0.201604	1.96865	0.160591	0.2487
Ap1s1	1.99283	0.206169	0.0762799	10.8488	0.000988585	0.00693183
Med31	1.1645	0.206139	0.0965837	6.6187	0.0100913	0.03844
Mtfr1	0.626236	0.206054	0.127376	4.17523	0.041019	0.102595
Ddx56	0.675525	0.206029	0.120876	4.67893	0.0305348	0.0841028
Ndufaf6	0.628939	0.205979	0.136211	3.694	0.0546086	0.123535
Cebpzos	1.12719	0.205903	0.101251	5.98313	0.0144433	0.0498645
Hsd17b14	0.309126	0.205746	0.240613	0.892377	0.344834	0.417676
Mafb	2.15169	0.205744	0.164911	1.58439	0.208129	0.295657
Gmps	2.06704	0.205717	0.0837214	9.2788	0.00231821	0.0131778
Ndufa12	9.05092	0.205552	0.0564423	14.9592	0.000109862	0.00124105
Sertad3	0.268901	0.205497	0.237294	0.971044	0.32442	0.401652
Rtn4rl1	0.270751	0.205426	0.264113	0.611296	0.4343	0.495238
Csf1	0.416655	0.20538	0.230078	0.817683	0.365858	0.435897
Trappc6b	2.11863	0.205342	0.0774403	10.3295	0.00130919	0.00859585
N4bp3	0.151911	0.205098	0.271842	0.932831	0.334128	0.409617
Cwc22	0.516645	0.204681	0.146495	2.56529	0.109233	0.193621
Usp20	0.324022	0.204611	0.192265	1.19536	0.27425	0.357162
Adsl	1.37156	0.204464	0.0942195	7.74005	0.00540094	0.0246827
Rnd1	0.425292	0.204433	0.197085	1.15559	0.282382	0.364283
Dgat1	0.216331	0.204422	0.233085	0.885396	0.346728	0.419022
Acly	0.750109	0.204257	0.131423	3.0119	0.0826551	0.161809
Pex26	0.318582	0.203561	0.198563	1.41287	0.234581	0.321879
Zfp219	0.324567	0.203368	0.184182	1.2633	0.261026	0.34606
Tm2d1	2.0636	0.203267	0.0739285	10.674	0.0010865	0.00742735
Tdp2	0.682865	0.203155	0.12954	4.86735	0.0273696	0.0776871
Klhdc8b	0.144539	0.203149	0.302514	0.525941	0.468318	0.523401
Larp7	1.73809	0.203	0.0887219	8.78111	0.00304365	0.0161609
Mrps31	0.908924	0.202811	0.104674	6.27577	0.01224	0.0443461
Mrps22	0.635131	0.202431	0.123805	4.22358	0.0398659	0.101003
Smc4	3.1395	0.202362	0.108846	3.97444	0.0461957	0.110699
Ppfia3	0.295745	0.202312	0.215143	1.48597	0.222843	0.310177
Crtap	0.65751	0.202163	0.153096	2.36812	0.123836	0.209782
Myl12a	4.12137	0.202053	0.0712459	9.53397	0.00201703	0.0118524
Asb17	0.233625	0.201858	0.261149	1.04501	0.306659	0.386001
Psma6	9.21905	0.20181	0.0623217	11.3564	0.000751875	0.00559694
Mmadhc	1.36776	0.201766	0.0906036	8.17271	0.00425253	0.020698
Elp2	0.560799	0.201474	0.138169	3.20616	0.0733615	0.149508
Fam187b	0.179815	0.201359	0.255341	0.7113	0.399013	0.463958
Cebpd	0.752337	0.201012	0.177108	1.32303	0.250049	0.33599
Lrrc41	0.433528	0.200659	0.166206	1.65767	0.197918	0.285532
Sirt6	0.330041	0.200577	0.178281	1.52167	0.217366	0.30503
Gm12655	0.497413	0.200531	0.149622	3.42079	0.0643803	0.137782
Glrx5	2.297	0.200504	0.0743395	11.0576	0.000883244	0.00636534
Scaf1	0.57784	0.200114	0.133189	2.82577	0.0927625	0.174772
Tbcb	4.79229	0.200105	0.0599162	14.3157	0.000154571	0.00162843
Kremen2	1.05026	0.199924	0.124743	2.98979	0.0837908	0.163341
Uqcrc1	3.70671	0.199864	0.0608887	14.485	0.000141282	0.00152077
Isyna1	4.55534	0.199815	0.0690638	10.0686	0.0015082	0.00956005
Mettl17	0.311055	0.19974	0.205647	1.30477	0.253344	0.338894
Mapkbp1	0.223458	0.199671	0.240552	1.09612	0.295118	0.375972
Ces2g	0.730103	0.199525	0.142245	2.27503	0.131473	0.217748
Tceanc2	0.470648	0.199504	0.155064	2.42568	0.119361	0.204833
Dctpp1	2.87922	0.199467	0.0907131	6.47378	0.0109478	0.040776
Sgf29	0.652468	0.199436	0.126585	4.66556	0.0307735	0.084407
Rbmxl1	2.71479	0.199425	0.0798415	9.37628	0.00219811	0.0126439
2310039H08Rik	0.647226	0.199424	0.131964	3.12768	0.0769734	0.154441
Bcar3	0.1576	0.199397	0.345387	0.400463	0.52685	0.572172
H2-T22	2.75248	0.199352	0.0771508	7.13446	0.00756162	0.0315711
Ddt	3.59992	0.199346	0.083846	6.4036	0.0113889	0.0419343
B3gat3	0.690534	0.199227	0.118537	4.09108	0.0431101	0.106022
Hnrnpa2b1	24.7155	0.199138	0.0554513	13.3418	0.000259551	0.00246743
Nans	3.11334	0.199015	0.0702357	9.84549	0.00170248	0.0104356
Timm22	1.11584	0.198938	0.0939374	7.59904	0.00583994	0.0261714
Ttc39c	0.189793	0.198918	0.258989	0.624764	0.429282	0.490886
Gm8113	0.631189	0.198723	0.299693	0.45091
Pycr2	1.37388	0.198714	0.0955558	7.32038	0.00681769	0.0292696
Mpg	0.663947	0.198318	0.120224	4.93079	0.0263823	0.075896
Pofut2	0.363769	0.198284	0.167579	1.69132	0.193428	0.281531
Klf6	4.91262	0.198106	0.13005	2.38695
Pgap2	1.47707	0.198036	0.0915102	7.33697	0.00675507	0.0290832
Tm2d2	2.06284	0.197944	0.0805556	8.49653	0.00355825	0.0180718
1810062G17Rik	0.214257	0.197908	0.264031	0.889296	0.345668	0.418169
Cibar1	1.94562	0.197903	0.0834449	8.91136	0.00283402	0.0152999
Zfp830	0.460369	0.197762	0.151089	3.11614	0.0775204	0.155158
Tmem167b	0.452924	0.197513	0.149128	2.491	0.114499	0.199725
Cpeb3	0.431188	0.197361	0.246901	0.754793
Cops7a	2.10825	0.197326	0.0770569	10.4671	0.00121521	0.00810906
Mat2b	1.76402	0.197047	0.089906	6.27887	0.0122186	0.0442986
Itm2b	26.6759	0.197006	0.070704	7.80712	0.00520407	0.0239477
Dhps	1.02544	0.196888	0.103276	6.20662	0.0127274	0.045372
Mplkip	0.997109	0.196867	0.109982	4.19567	0.0405273	0.101845
Echdc2	0.327142	0.196809	0.177834	2.16283	0.141384	0.228406
Zcchc18	0.292285	0.196682	0.31718	0.47598	0.490249	0.541326
Efnb2	0.791848	0.196529	0.152375	1.72501	0.189049	0.277798
Emp3	0.335389	0.196455	0.30332	0.420546	0.516665	0.56385
Nin	0.291036	0.196377	0.20734	1.06107	0.302971	0.382856
Nfkbil1	0.483031	0.196187	0.144	2.68117	0.101541	0.184975
Kif23	0.713525	0.195738	0.190228	1.26141	0.261385	0.346358
Nol6	0.507797	0.195689	0.159131	1.91168	0.166777	0.255194
Thoc3	0.843429	0.195674	0.114799	5.38519	0.0203084	0.063531
Irak1bp1	0.860788	0.195489	0.124303	4.18837	0.0407021	0.102091
Nsun3	0.198556	0.195379	0.24393	0.867208	0.351729	0.423525
Bhlhb9	0.764168	0.195367	0.134967	3.17207	0.0749076	0.151583
Mcrs1	1.18688	0.195238	0.0974934	6.22101	0.0126243	0.045178
Tmem199	1.35232	0.194918	0.0915576	7.22984	0.00717015	0.0304447
Fuca1	3.07781	0.194908	0.136751	2.13365	0.144097	0.231452
Mill2	0.149719	0.194828	0.308149	0.44762	0.503467	0.552707
Cpsf6	2.22646	0.194828	0.0754544	10.0424	0.00152975	0.0096509
Kcnh6	0.580723	0.19476	0.138534	3.26086	0.0709517	0.146365
Chkb	0.28228	0.194729	0.189903	1.33795	0.247395	0.333563
Atp5g1	13.5331	0.194654	0.0587122	11.7462	0.000609662	0.00475125
[truncated: 8,875 more rows]

## Sheet: mTEC I_Intertypical
GeneName	baseMean	log2FoldChange	lfcSE	stat	pvalue	padj
Myh1	0.0607537	18.6012	29.0305	63.2065
Acta1	0.262512	8.01616	0.949226	64.2072
Gm36660	2.46746	7.64304	0.183293	3921.82	0	0
Sln	0.351503	7.33928	0.506745	276.727
Tnnc2	0.279958	7.22977	0.662518	118.266
Myog	0.102453	6.73846	0.790258	91.4693
Chrna1	0.0160258	6.58778	1.69585	24.2508
Myo18b	0.056404	6.08147	0.667938	258.669	3.34633e-58	2.04461e-55
Klhl41	0.032246	5.58857	0.841172	72.1255	2.01934e-17	8.93262e-16
Sgcg	0.0150311	5.54212	1.07347	68.2047	1.47373e-16	6.02813e-15
Tnnt3	0.0310283	5.48002	1.11792	25.4282
Cck	0.746293	5.35596	0.257738	421.554
Kcnt1	0.0171349	5.03222	0.882542	72.3324	1.81842e-17	8.11727e-16
Tnni2	0.0322933	4.95648	0.85716	38.168
Cacng1	0.0149636	4.90912	1.05737	29.9351
Gm43016	0.0324213	4.72165	0.712305	56.2952	6.23662e-14	1.8645e-12
Myl1	0.279157	4.66538	0.38506	140.495
Mylpf	0.177216	4.37292	0.40585	115.806
Prdm6	0.0447722	4.28448	0.462186	133.417	7.32939e-31	1.06943e-28
Casq1	0.0257902	4.21006	0.88266	23.9832
Prss22	0.0999319	4.09687	0.311104	236.578	2.19256e-53	1.19081e-50
Cdkn1c	0.491457	3.93346	0.27198	200.702
Phex	0.0287166	3.87233	0.55151	65.0934	7.143e-16	2.73843e-14
Gm19696	0.0367844	3.74973	0.407526	139.317	3.75547e-32	6.11891e-30
Pgam2	0.111626	3.63565	0.296189	177.071	2.1135e-40	5.29784e-38
Tmem72	0.0104801	3.59918	0.836783	24.1333	8.98904e-07	8.45783e-06
Lama1	0.0562956	3.57095	0.370314	116.743	3.26861e-27	3.67286e-25
Irx3	0.0721451	3.56448	0.295166	204.111	2.64719e-46	8.62632e-44
Rprm	0.123951	3.54339	0.355751	104.518	1.5576e-24	1.35956e-22
Piezo2	0.225465	3.53681	0.215748	300.24	2.92056e-67	2.85514e-64
Alms1-ps2	0.0190801	3.42997	0.594385	42.5541	6.87533e-11	1.35511e-09
Neb	0.0364058	3.39374	0.509034	50.2782	1.3342e-12	3.43241e-11
Trdn	0.0493837	3.18742	0.457593	53.5541	2.51566e-13	7.06699e-12
Col7a1	0.067862	3.11256	0.258865	199.222	3.08742e-45	9.73632e-43
Ceacam10	0.0286347	3.04197	0.445321	56.861	4.67725e-14	1.44699e-12
Bcl2a1b	0.154417	2.93532	0.275906	118.675	1.2335e-27	1.50734e-25
Umod	0.0139053	2.82595	1.06213	7.29793
Cntnap5a	0.0155296	2.82475	0.659956	20.28	6.68959e-06	5.06957e-05
Chrm3	0.00945617	2.81602	0.733053	17.5657	2.77552e-05	0.000179336
Grin2a	0.0151228	2.72332	0.918902	8.95591	0.00276573	0.00923107
Plxna4	0.0409017	2.71493	0.383115	56.6279	5.2659e-14	1.60753e-12
Fam20a	0.04142	2.68451	0.304737	97.1777	6.33775e-23	4.80293e-21
Bcl2a1d	0.221233	2.65441	0.230989	137.163	1.11085e-31	1.72376e-29
Car12	0.0259248	2.64584	0.444476	40.5038	1.96237e-10	3.56683e-09
Dgki	0.307947	2.62112	0.149978	330.947	5.97831e-74	9.74066e-71
Stc1	0.046708	2.49338	0.319492	68.5632	1.22878e-16	5.11171e-15
Tnnt2	0.0468246	2.45723	0.372496	48.2258	3.79857e-12	9.03523e-11
Cited4	0.043535	2.45664	0.295259	82.3522	1.13878e-19	6.66627e-18
Aqp5	0.0459296	2.44191	0.315613	68.4284	1.31566e-16	5.42696e-15
Clstn2	0.125494	2.43821	0.2378	113.306	1.84934e-26	1.90307e-24
Grem2	0.0643196	2.39068	0.297802	69.7829	6.62027e-17	2.85109e-15
Slc16a11	0.05082	2.34416	0.262176	93.7083	3.65632e-22	2.55316e-20
Aldh3b2	0.0110022	2.33496	0.621868	16.6388	4.52158e-05	0.00027558
Cox8b	0.0844755	2.33094	0.284819	72.3449	1.80688e-17	8.10276e-16
Gm32828	0.0149169	2.31869	0.570653	18.0602	2.14025e-05	0.000142528
5430431A17Rik	0.189353	2.28713	0.200425	136.845	1.30365e-31	1.99132e-29
Tnf	0.0516613	2.28702	0.428312	29.3096	6.16886e-08	7.3996e-07
Ddr2	0.0241403	2.28212	0.407846	35.3534	2.74991e-09	4.2066e-08
Ovol3	0.0119496	2.27177	1.04118	4.96267	0.0259002	0.0582472
Krt15	0.126412	2.27136	0.302802	58.0723	2.52665e-14	8.07207e-13
5430402P08Rik	0.0200106	2.26509	0.510224	21.1501	4.24679e-06	3.35623e-05
Snhg11	0.233511	2.253	0.18157	162.739	2.85294e-37	5.93412e-35
Depp1	0.0272103	2.23668	0.417156	31.346	2.15899e-08	2.85219e-07
Ly6k	0.0557808	2.2221	0.322346	50.5874	1.13974e-12	2.95548e-11
Edn2	0.0645046	2.21936	0.260819	80.108	3.54498e-19	1.95795e-17
Fst	2.07433	2.19476	0.104036	449.976	7.30085e-100	2.3791e-96
Col26a1	0.0188061	2.18311	0.425458	30.3625	3.58384e-08	4.51103e-07
Ccn4	0.0272137	2.17288	0.361122	41.4175	1.22952e-10	2.30706e-09
H3c15	0.0235729	2.1665	0.363164	41.6599	1.08611e-10	2.06172e-09
Igfbp3	0.403494	2.1004	0.163113	171.64	3.24297e-39	7.04516e-37
Krt19	0.0745416	2.07303	0.325198	42.2692	7.95354e-11	1.55197e-09
Gpr15lg	0.0270324	2.06977	0.445581	23.3293	1.36504e-06	1.22879e-05
Aim2	0.0973335	1.97823	0.195759	110.723	6.80548e-26	6.58717e-24
Cnr1	0.0126033	1.9706	0.631599	10.2743	0.00134894	0.00506227
Epyc	0.0661489	1.96835	0.336919	35.6925	2.31048e-09	3.5796e-08
Rasl11b	0.0653318	1.94467	0.278825	51.1065	8.74865e-13	2.29911e-11
4831440D22Rik	0.0648899	1.92559	0.24222	68.388	1.34294e-16	5.5162e-15
Krt12	0.0130178	1.9243	0.496763	17.395	3.03621e-05	0.000194127
Pglyrp1	0.0388123	1.89181	0.286543	48.2814	3.69235e-12	8.82554e-11
Calml3	0.327543	1.85811	0.125658	229.943	6.13491e-52	2.99874e-49
Pla2g7	0.0725768	1.85287	0.220124	76.8707	1.82523e-18	9.29345e-17
Col8a1	0.105056	1.85035	0.282013	45.0336	1.93684e-11	4.17981e-10
Skint6	0.0255632	1.84557	0.440696	18.512	1.68842e-05	0.000115185
Art2a	0.0134917	1.84264	0.520024	13.748	0.000209043	0.00103578
Pou3f1	0.387747	1.80301	0.153818	140.167	2.44684e-32	4.12418e-30
Cdkn2a	0.0310667	1.79107	0.363983	25.4987	4.42685e-07	4.45694e-06
Foxd3	0.0175499	1.78867	0.45629	17.1403	3.47173e-05	0.000218542
Ces2c	0.0558198	1.78087	0.249566	55.6563	8.63174e-14	2.52646e-12
Lgr6	0.0496498	1.77225	0.285924	40.6113	1.85728e-10	3.39379e-09
3110099E03Rik	0.0551577	1.75974	0.274764	43.3321	4.61954e-11	9.26673e-10
Syt17	0.0489365	1.75567	0.243569	56.5669	5.43193e-14	1.64404e-12
Ank1	0.0106423	1.75499	0.605	9.1225	0.00252485	0.00856365
Sncb	0.0386543	1.75264	0.367515	24.3215	8.15235e-07	7.74454e-06
Gpx2	0.246323	1.75247	0.151751	139.934	2.75209e-32	4.56007e-30
D430041D05Rik	0.112709	1.7475	0.209189	72.9494	1.33019e-17	6.19235e-16
A830036E02Rik	0.0186721	1.72248	0.518617	11.5523	0.000676671	0.00284278
Zfp185	0.0320942	1.68242	0.307426	32.5528	1.15996e-08	1.61997e-07
Sox11	0.153716	1.6728	0.199916	72.6884	1.51822e-17	6.90331e-16
Vcan	0.113124	1.64335	0.191648	77.4688	1.34839e-18	6.91142e-17
Accsl	0.011034	1.6427	0.807322	4.26154	0.0389845	0.0802854
Optc	0.0808303	1.62919	0.223253	56.6844	5.11679e-14	1.57301e-12
Prelp	0.0828018	1.6198	0.235642	49.8115	1.69249e-12	4.25342e-11
Slc38a1	0.172769	1.60063	0.151126	117.501	2.23038e-27	2.59574e-25
Aif1l	0.0226434	1.59839	0.401973	17.429	2.98244e-05	0.000191692
St3gal5	0.0331961	1.59795	0.295444	32.4669	1.21241e-08	1.68839e-07
Krt33b	0.05912	1.59534	0.287793	32.8803	9.80137e-09	1.3767e-07
Plcd4	0.0385609	1.59386	0.297324	30.3695	3.57101e-08	4.50455e-07
Fyn	0.0821374	1.59011	0.195592	70.8917	3.7739e-17	1.63972e-15
Tshz2	0.460971	1.58305	0.111288	208.519	2.88988e-47	1.04635e-44
Wnt6	0.0700535	1.56642	0.22272	53.5402	2.53349e-13	7.09668e-12
Gm40841	0.0439708	1.56493	0.260828	38.0204	7.00093e-10	1.16396e-08
Fbn2	0.0803396	1.5496	0.284156	30.7377	2.95376e-08	3.8095e-07
Cyp2f2	0.790306	1.54292	0.107413	210.867	8.88594e-48	3.34111e-45
Kit	0.0180126	1.53176	0.43337	13.3676	0.000256009	0.00123409
Crabp2	0.129417	1.52983	0.201659	61.0981	5.42999e-15	1.91637e-13
Gm830	0.0708513	1.52378	0.26963	32.8873	9.76587e-09	1.37369e-07
Sult2b1	0.0341221	1.5203	0.282172	31.3833	2.11793e-08	2.80553e-07
Sel1l3	0.0600736	1.51202	0.225302	47.4164	5.74001e-12	1.33605e-10
Prss33	0.214687	1.51047	0.127565	147.724	5.45109e-34	9.8685e-32
Entpd3	0.5139	1.50683	0.121744	156.457	6.72538e-36	1.28916e-33
Aqp3	0.109197	1.50359	0.196427	61.1964	5.16565e-15	1.83634e-13
Slco1a5	0.0838215	1.49253	0.252229	35.9117	2.06462e-09	3.22424e-08
Itgb5	0.170988	1.49225	0.136735	124.594	6.24644e-29	7.9551e-27
Gm36459	0.0210562	1.48919	0.50984	8.86633	0.00290478	0.0095904
Smoc2	0.967508	1.48672	0.0913806	272.157	3.84377e-61	2.68405e-58
Fgfbp1	0.0408226	1.48383	0.309114	24.5195	7.35623e-07	7.05736e-06
Gm45941	0.0254812	1.48136	0.354626	18.7861	1.46233e-05	0.000101388
Utf1	0.0954667	1.47731	0.218053	48.6616	3.04164e-12	7.34199e-11
Adamts4	0.0234016	1.47175	0.417777	12.7836	0.000349664	0.00160786
Fgfr4	0.0810937	1.46866	0.200467	57.2529	3.83223e-14	1.19693e-12
Ddc	0.0207043	1.46787	0.428817	12.3723	0.000435739	0.00194214
Morrbid	0.0349963	1.45728	0.346182	18.3682	1.82071e-05	0.000123008
Tbx21	0.0188201	1.45225	0.443432	11.1336	0.000847789	0.00342196
Igfbp6	0.0253836	1.43725	0.354436	17.2339	3.30489e-05	0.000209253
Cyp27a1	0.0168559	1.42517	0.541581	7.21322	0.00723687	0.0205125
Ly6i	0.0252749	1.4251	0.415996	12.3596	0.000438714	0.00195126
Lbhd2	0.0302626	1.42207	0.396128	13.8877	0.00019406	0.000975892
Pdlim2	0.146085	1.4164	0.144174	102.901	3.52241e-24	2.91823e-22
Igsf8	0.0890384	1.41589	0.172683	72.9068	1.35916e-17	6.26754e-16
Tnip3	0.020656	1.41377	0.408967	12.6088	0.000383933	0.00174007
Ckb	0.015944	1.41262	0.484629	9.30473	0.00228563	0.00789551
Emp3	0.0315366	1.41207	0.363203	16.0758	6.08571e-05	0.000356251
Mybpc2	0.135477	1.40916	0.176241	65.9916	4.52844e-16	1.78801e-14
Gm57012	0.158692	1.40886	0.214204	44.0668	3.1736e-11	6.57312e-10
Ifitm1	0.318597	1.39746	0.200831	49.557	1.92692e-12	4.80551e-11
Cldn3	0.0455684	1.39303	0.283895	25.5506	4.30923e-07	4.35647e-06
Fgf21	0.81657	1.39288	0.105366	181.099	2.78899e-41	7.57366e-39
Nkx6-2	0.0691211	1.38039	0.346815	16.6726	4.4418e-05	0.000271734
Gm31718	0.0413362	1.37744	0.333792	17.4834	2.89831e-05	0.000186776
Osr2	0.0449668	1.37669	0.336534	17.2161	3.33592e-05	0.000210807
Fam3d	0.0379903	1.37321	0.278875	25.8168	3.75409e-07	3.84696e-06
Tmprss4	0.248158	1.37088	0.128686	117.982	1.74958e-27	2.0679e-25
Lrrn1	0.1609	1.36709	0.157406	78.5978	7.61326e-19	4.06706e-17
Ak1	0.0256988	1.35839	0.357222	15.3477	8.94292e-05	0.000498722
Dync1i1	0.472139	1.34873	0.129533	111.275	5.15046e-26	5.03509e-24
Thra	0.048049	1.3335	0.236644	33.5212	7.04916e-09	1.00897e-07
Glra1	0.0144795	1.32918	0.590695	5.52591
Pvalb	0.401574	1.32265	0.179305	56.2985
Fbln2	0.0447868	1.31324	0.264339	25.8742	3.64409e-07	3.74602e-06
Abcc3	0.129176	1.29678	0.152367	75.0064	4.69199e-18	2.27074e-16
Dsg3	0.0206058	1.29525	0.405053	10.5562	0.00115798	0.00445528
Upb1	0.0453398	1.29323	0.239311	31.0854	2.46916e-08	3.22277e-07
Slc7a5	0.348543	1.29222	0.139649	87.2537	9.54554e-21	6.22115e-19
Acta2	5.24164	1.28638	0.110287	138.923	4.57925e-32	7.22044e-30
Gm56532	0.0369188	1.28561	0.306071	18.0848	2.11277e-05	0.000141178
Dapl1	2.07182	1.28139	0.0815151	252.48	7.47752e-57	4.30001e-54
Adgrb1	0.0726683	1.27015	0.200068	41.5507	1.14855e-10	2.16761e-09
Slc6a2	0.0375666	1.26102	0.285919	20.3437	6.47063e-06	4.91125e-05
Tfap2c	0.0499387	1.25999	0.277164	21.1589	4.22736e-06	3.34629e-05
Fbxl22	0.0452805	1.2579	0.310017	17.7826	2.47643e-05	0.000161828
Csta2	0.0159348	1.25635	0.50824	6.35409	0.0117111	0.0306199
Gm57459	0.301423	1.25012	0.118268	114.331	1.10259e-26	1.17162e-24
Stard13	0.0468515	1.24552	0.264623	23.1108	1.52933e-06	1.36411e-05
Ass1	0.109246	1.24189	0.193144	43.3294	4.62578e-11	9.26673e-10
Il23a	0.477439	1.22259	0.124823	98.1844	3.81177e-23	2.95745e-21
Gm41307	0.0739035	1.22238	0.213658	33.7961	6.12e-09	8.85046e-08
Sprr1a	0.116367	1.20741	0.334452	13.3949
Dlgap1	0.0708859	1.19657	0.306798	15.4482	8.47978e-05	0.000475607
Nppc	0.141342	1.19421	0.2246	29.1622	6.65663e-08	7.96515e-07
Lgals7	0.0937112	1.18434	0.264123	20.7429	5.25249e-06	4.05275e-05
Tgfb2	0.115225	1.18402	0.175769	47.2052	6.39304e-12	1.47402e-10
Gm32391	0.0254112	1.18343	0.389789	9.37937	0.00219441	0.00761268
Aldh3a1	0.0986985	1.18331	0.178412	46.0768	1.13708e-11	2.50363e-10
Laptm5	0.169218	1.17769	0.187344	40.4851	1.9812e-10	3.59336e-09
Aox2	0.016406	1.17413	0.494856	5.78198	0.0161913	0.0398505
Snx24	0.0511231	1.15898	0.241468	23.963	9.82069e-07	9.16098e-06
Rbm20	0.0788084	1.15537	0.188092	39.2725	3.68589e-10	6.38888e-09
Gm56515	0.0278059	1.14714	0.423535	7.46273	0.00629893	0.01824
Msln	0.450432	1.14549	0.1363	72.4476	1.71529e-17	7.72751e-16
Pmaip1	0.158743	1.13932	0.194909	34.7257	3.79588e-09	5.67409e-08
Gsto1	0.0707007	1.13777	0.210457	30.4531	3.42041e-08	4.33134e-07
Cap2	0.113134	1.133	0.1831	39.7075	2.94994e-10	5.21494e-09
Clca3a2	1.9884	1.13168	0.0750361	232.617	1.60186e-52	8.24198e-50
Has2	0.0733391	1.11993	0.275945	17.0366	3.66663e-05	0.000228458
A230083N12Rik	0.0929828	1.11646	0.231406	23.6347	1.16469e-06	1.06711e-05
Chst5	0.0962697	1.11135	0.168543	46.1474	1.09684e-11	2.43146e-10
Deptor	0.0695149	1.10634	0.21269	27.6369	1.46363e-07	1.63338e-06
Rusc2	0.0788187	1.10079	0.192007	33.65	6.59748e-09	9.47092e-08
Card14	0.0846199	1.09735	0.198251	31.2302	2.29173e-08	3.01534e-07
Gm34933	0.0193287	1.09701	0.423794	6.90519	0.00859458	0.0236678
Rab25	0.118795	1.09561	0.167686	44.1459	3.0479e-11	6.32617e-10
Htr1f	0.0453072	1.0934	0.296378	13.8501	0.000197988	0.000990039
Zeb2	0.0343952	1.09297	0.439167	6.25886	0.0123574	0.0319888
Ddit4l	0.794472	1.09091	0.119557	85.1281	2.79653e-20	1.75249e-18
Selenom	0.103431	1.08911	0.209136	28.3645	1.0049e-07	1.1626e-06
Wfdc17	0.0600044	1.08321	0.427844	6.63284
Aunip	0.0323672	1.08085	0.517927	4.43878
Gm42702	0.0116236	1.07936	0.589275	3.42369	0.0642672	0.116412
Enpep	0.0574926	1.07703	0.264139	17.0284	3.68258e-05	0.000229305
Grid1	0.101683	1.0769	0.232061	22.1262	2.553e-06	2.14971e-05
Rbm24	0.171591	1.07624	0.172097	40.3757	2.09529e-10	3.75224e-09
Kcnq1	0.148528	1.07535	0.17064	40.6311	1.83859e-10	3.36593e-09
Skint9	0.0220531	1.07431	0.373508	8.8335	0.00295751	0.00973815
Cryab	0.57759	1.07324	0.126605	74.1702
Gm30211	0.0186727	1.07229	0.553193	3.80766	0.0510187	0.098123
Aadac	0.103615	1.07006	0.20166	29.414	5.84541e-08	7.04621e-07
Bik	0.0765874	1.0655	0.211387	26.4648	2.68379e-07	2.81813e-06
Eno3	0.046933	1.06319	0.25408	19.0195
Trim63	0.14432	1.06015	0.168605	40.4363	2.03133e-10	3.66173e-09
Hopx	0.0763914	1.05374	0.202092	28.5103	9.3199e-08	1.08725e-06
Osbpl3	0.119022	1.04913	0.160943	43.6096	4.00858e-11	8.16415e-10
Fam163a	0.0168446	1.04912	0.479668	4.84269	0.0277636	0.0615318
Man1c1	0.103748	1.04847	0.173736	37.2986	1.01359e-09	1.64632e-08
Gria1	0.00979398	1.04763	0.773447	1.87271	0.171165	0.237748
Ackr3	0.12666	1.04546	0.212234	24.6245	6.96602e-07	6.71596e-06
1700019D03Rik	0.187366	1.04531	0.160799	43.7014	3.82503e-11	7.8229e-10
Ntn4	0.10004	1.04123	0.173689	36.8429	1.28041e-09	2.06215e-08
Wnt10a	0.195452	1.03885	0.134937	62.5009	2.66326e-15	9.67881e-14
Arg2	0.0568961	1.03811	0.22535	21.8632	2.92798e-06	2.4237e-05
Hmcn1	0.107056	1.03595	0.215529	23.9128	1.00802e-06	9.36727e-06
Ltb	0.0330508	1.03563	0.363772	8.55179	0.00345182	0.011093
Hs3st1	0.0448522	1.03433	0.261557	15.8874	6.72245e-05	0.000389098
Dnm3	0.859551	1.03115	0.0791319	173.54	1.24726e-39	2.83564e-37
Gm49774	0.060436	1.02914	0.233767	19.5845	9.62466e-06	6.99559e-05
1600002D24Rik	0.0210553	1.02192	0.383192	7.23717	0.00714096	0.0202995
Gm49171	0.0150665	1.01482	0.543506	3.52891	0.0603075	0.110933
Sorbs2	0.117516	1.01474	0.185397	30.5996	3.17151e-08	4.07421e-07
Anxa3	0.0606425	1.01197	0.225152	21.5544	3.43941e-06	2.79498e-05
H1f2	0.195166	1.01175	0.151986	45.736	1.35313e-11	2.94615e-10
Dcn	1.18243	1.00548	0.134449	57.2876	3.76525e-14	1.17978e-12
Kndc1	0.148955	1.00533	0.143426	50.1458	1.42733e-12	3.64324e-11
Fggy	0.253792	0.996816	0.12858	61.2515	5.02306e-15	1.79874e-13
Sned1	0.104651	0.996718	0.193946	26.8024	2.25358e-07	2.41568e-06
Skint3	0.576266	0.993939	0.128093	61.2301	5.07804e-15	1.81178e-13
Kcnb2	0.971595	0.993033	0.104375	92.4443	6.92483e-22	4.80121e-20
Ptpre	0.0725239	0.990557	0.193528	26.8487	2.20024e-07	2.36889e-06
Kbtbd8	0.0245373	0.989532	0.349187	8.14496	0.0043181	0.0133715
Efemp1	0.0360965	0.988023	0.302728	11.2097	0.000813699	0.00331171
Runx1t1	0.0121629	0.986145	0.55052	3.30177	0.0692054	0.123189
Gng13	0.0523025	0.985746	0.283099	12.6313	0.000379332	0.00172161
Ly6d	1.10941	0.985631	0.155604	40.956	1.55698e-10	2.88277e-09
Sgcd	0.0516556	0.985111	0.29537	11.6767	0.000632881	0.00268535
Igkc	0.0561019	0.980819	0.241724	17.1323	3.48646e-05	0.000219328
Ect2l	0.227934	0.977815	0.18117	29.7623	4.88389e-08	6.0208e-07
H3c4	0.142587	0.974642	0.212411	21.3321	3.86204e-06	3.09723e-05
Cldn1	0.295965	0.973807	0.114567	73.7379	8.92115e-18	4.21319e-16
Tubb3	0.0444979	0.973666	0.343512	8.29458	0.00397636	0.0124953
Mthfd1l	0.088751	0.966418	0.216847	20.2952
Gadd45a	0.197855	0.963578	0.135731	51.6746	6.55036e-13	1.73071e-11
Clu	4.16951	0.961627	0.066127	216.211	6.06648e-49	2.47108e-46
H3c14	0.0492453	0.960827	0.230902	17.5915	2.7381e-05	0.000177152
Syn2	0.0328585	0.960477	0.378407	6.52898	0.0106131	0.0282784
Adcy8	0.0151347	0.960343	0.588604	2.69927	0.100394	0.161743
Cd276	0.0584463	0.959863	0.208512	21.5297	3.48385e-06	2.82406e-05
Nedd4l	0.458977	0.957935	0.0933698	107.193	4.03906e-25	3.72508e-23
B930036N10Rik	0.256521	0.952097	0.179574	28.4854	9.44086e-08	1.09743e-06
G530011O06Rik	0.0734188	0.950704	0.205237	21.8942	2.88105e-06	2.39093e-05
Slc16a6	0.0566948	0.949047	0.21723	19.9302	8.03234e-06	5.95331e-05
Bmp3	0.054598	0.947107	0.240811	15.8538	6.84277e-05	0.000394428
Adora2b	0.0541077	0.946498	0.208861	21.3203	3.88599e-06	3.10905e-05
Gm16233	0.0623273	0.946343	0.234226	16.6126	4.58465e-05	0.000278904
Cxcl1	0.0241392	0.945347	0.516828	3.45534	0.0630476	0.114777
Engase	0.271745	0.945204	0.122777	59.9773	9.59572e-15	3.26856e-13
Arpp21	0.127327	0.944958	0.193117	24.8278	6.26879e-07	6.12837e-06
Gm47861	0.0271175	0.944852	0.366779	6.73436	0.0094573	0.0256818
Plb1	0.541011	0.942435	0.115153	69.3948	8.06006e-17	3.41104e-15
Fmod	0.0700889	0.94173	0.271735	12.427	0.000423177	0.00189335
Gm49083	0.11502	0.941503	0.310254	9.3404
Filip1	0.188995	0.940609	0.166995	32.5097	1.18598e-08	1.65395e-07
Klf2	0.307055	0.937747	0.164377	33.585
Sema3d	0.223361	0.93636	0.14688	41.6157	1.11098e-10	2.10483e-09
Ndrg1	0.10996	0.935553	0.177427	28.1545	1.12006e-07	1.27917e-06
4930444M15Rik	0.0538521	0.930499	0.294596	10.0708	0.00150641	0.00555312
Rtn4r	0.10309	0.927076	0.173245	29.6883	5.07408e-08	6.23169e-07
Fam83d	0.0156571	0.921073	0.530481	3.05663	0.0804082	0.137185
Gm56692	0.0230814	0.918698	0.361976	6.61004	0.0101405	0.0272495
Serpinb5	0.360285	0.917625	0.105781	77.5847	1.27154e-18	6.61201e-17
Mgll	0.106554	0.914859	0.186924	25.0395	5.61669e-07	5.54634e-06
Zfp296	0.0454215	0.914608	0.243801	14.5161	0.000138965	0.000727257
Wnt5b	0.0440537	0.914058	0.256121	12.9685	0.000316778	0.00147961
Gm50013	0.0446377	0.913751	0.287395	10.3209	0.00131529	0.00496457
Grm7	0.0197933	0.913693	0.401179	5.33824	0.0208625	0.0490152
Catsper2	0.0774196	0.91075	0.201195	20.9692	4.66734e-06	3.65024e-05
Mlf1	0.015192	0.90811	0.538693	2.92098	0.0874348	0.146182
Jph2	0.0469965	0.907871	0.267098	11.6915	0.000627877	0.00266759
Csf2rb	0.123717	0.907811	0.17707	26.6005	2.50179e-07	2.65839e-06
Cd59a	0.0584017	0.906941	0.231076	16.3641	5.22661e-05	0.000311747
Itprid2	0.562427	0.904982	0.0834181	120.486	4.95169e-28	6.12756e-26
Cox17	1.02598	0.904264	0.0715711	166.444	4.42559e-38	9.40535e-36
Nos1	0.145443	0.904213	0.151861	36.2735	1.71483e-09	2.71265e-08
Lama5	0.17387	0.902772	0.121003	56.2818	6.27931e-14	1.87154e-12
Sstr2	0.0637565	0.899819	0.207629	19.5555	9.77199e-06	7.08162e-05
Cdkn1a	0.390167	0.899006	0.133449	46.5676	8.85098e-12	1.99371e-10
Sox7	0.221078	0.898444	0.175832	26.4279	2.73558e-07	2.86635e-06
Il4i1	0.384774	0.892646	0.147046	38.3661	5.86437e-10	9.8845e-09
Mical2	0.0860193	0.886219	0.18868	22.8916	1.71396e-06	1.5014e-05
Gm57159	0.0185215	0.886128	0.459515	3.80552	0.0510838	0.0982096
Ccdc3	0.0729007	0.883985	0.255234	12.2454	0.000466416	0.00205484
Gt(ROSA)26Sor	0.0819859	0.883755	0.170698	27.2522	1.78573e-07	1.95271e-06
Elapor1	0.040434	0.883003	0.319085	7.71306	0.00548227	0.016305
Prune2	0.100458	0.881541	0.202505	19.5404	9.84943e-06	7.12716e-05
Cmklr2	0.0258107	0.88113	0.44604	3.94209	0.0470922	0.0922961
Cftr	0.0881943	0.880175	0.209201	17.9286	2.2935e-05	0.000151598
Mdga1	0.214226	0.879799	0.128796	47.7141	4.93131e-12	1.15886e-10
Gm7967	0.0911097	0.874837	0.204751	18.5703	1.63754e-05	0.000112184
Col17a1	0.0833791	0.871405	0.19036	21.3201	3.88631e-06	3.10905e-05
4930518J21Rik	0.0244532	0.870467	0.352953	6.15986	0.0130681	0.0334785
Tmem158	0.419613	0.870326	0.10241	75.5637	3.53808e-18	1.74688e-16
Cp	0.0986287	0.867133	0.215301	16.4753	4.92882e-05	0.000296335
Hip1	0.402482	0.863336	0.101314	73.7093	9.05121e-18	4.25407e-16
Epha3	0.0325371	0.861944	0.428469	4.17292	0.041075	0.0834474
Gm47547	0.107764	0.860589	0.181695	22.8524	1.7493e-06	1.52826e-05
Igf1	0.126594	0.859662	0.229061	14.3946	0.000148225	0.000767333
Lum	0.0341601	0.857913	0.417852	4.39757	0.0359901	0.0757948
Kcnk1	0.0858613	0.857419	0.179552	23.7125	1.11855e-06	1.02868e-05
Nbl1	0.140053	0.851084	0.162007	29.1116	6.83251e-08	8.1656e-07
H4c14	0.139017	0.851053	0.187882	20.6529	5.50528e-06	4.23443e-05
Vit	0.0868216	0.848517	0.198469	18.4373	1.75591e-05	0.000119372
E130114P18Rik	0.349897	0.847422	0.112607	57.7947	2.90947e-14	9.23472e-13
Ier3	0.655192	0.846172	0.118129	52.1876	5.04434e-13	1.3585e-11
Sema4d	0.136977	0.844213	0.133691	40.5032	1.96292e-10	3.56683e-09
Cpm	0.171643	0.84382	0.20874	16.6074	4.59725e-05	0.000279494
Tgm2	0.0601702	0.8434	0.229736	14.0977	0.000173554	0.000881841
Ckap2	0.0218915	0.840208	0.45613	3.45181	0.0631825	0.114958
Edn1	0.0517518	0.839747	0.271209	9.75444	0.0017889	0.00643425
Pnpla2	0.211312	0.839374	0.112991	58.8164	1.7309e-14	5.6974e-13
Flacc1	0.0711626	0.834976	0.284915	8.69595	0.00318918	0.0103811
Arc	0.0364124	0.834381	0.333987	6.30126	0.0120652	0.0313612
Gm42047	0.0173611	0.828155	0.474537	3.141	0.0763472	0.131912
Necab1	0.0479433	0.826637	0.294926	8.20364	0.00418065	0.0130325
2900052L18Rik	0.105439	0.825414	0.167545	24.4279	7.71425e-07	7.35034e-06
Gldn	0.0287749	0.824987	0.359958	5.3285	0.0209794	0.0492425
Gm13963	0.0501049	0.822085	0.251229	10.8016	0.00101414	0.00397684
Ppp3cc	0.0531173	0.821965	0.219965	14.1348	0.000170169	0.000865544
Rell1	0.192789	0.819434	0.127523	42.2173	8.16745e-11	1.58423e-09
Spock1	0.0330427	0.81701	0.315373	6.88847	0.00867533	0.0238601
Gm42743	0.0664155	0.812735	0.253744	10.2996	0.00133056	0.00500788
Tfcp2l1	0.0508842	0.807315	0.299186	7.34388	0.00672915	0.0193085
Kcnh8	0.0170836	0.806984	0.51883	2.48864	0.114671	0.178451
Fxyd5	0.0271419	0.804118	0.348026	5.44701	0.0196018	0.0466587
Agfg2	0.176502	0.803308	0.122587	44.3454	2.75255e-11	5.82444e-10
Gm15726	0.188213	0.79959	0.162888	24.3179	8.16757e-07	7.74454e-06
Ces2g	0.0826484	0.798148	0.176379	22.5495	2.04797e-06	1.76396e-05
Igfbp2	0.59361	0.795692	0.158185	26.0354	3.35208e-07	3.47877e-06
Lzts1	0.116006	0.79467	0.15351	27.7001	1.41655e-07	1.58628e-06
Dbp	0.0536552	0.793712	0.226722	13.232	0.000275217	0.00131272
Gm43672	0.0874566	0.787907	0.170825	21.8354	2.97064e-06	2.45693e-05
Atp1b1	1.08986	0.787277	0.089512	79.1691	5.70149e-19	3.09654e-17
Arhgap29	0.0531769	0.78458	0.235203	11.2315	0.000804193	0.00327711
4833418N02Rik	0.0807557	0.783396	0.180774	18.9025	1.3757e-05	9.62007e-05
Art3	0.505181	0.783008	0.0884756	79.4093	5.04892e-19	2.75744e-17
Gm29481	0.0270615	0.780896	0.359655	4.84296	0.0277592	0.0615318
H2bc4	1.30435	0.78009	0.0780586	102.292	4.79086e-24	3.93576e-22
Il12rb1	0.02521	0.777034	0.550264	2.08109
Card19	0.200156	0.774407	0.113792	48.962	2.60975e-12	6.42644e-11
Chchd10	0.152625	0.774224	0.159639	24.9312	5.94137e-07	5.84923e-06
Ntrk3	0.416734	0.772497	0.12272	40.1364	2.36837e-10	4.22504e-09
Cep85	0.109235	0.767935	0.155277	25.2092	5.14364e-07	5.105e-06
Scx	0.86923	0.767724	0.100038	60.3901	7.78018e-15	2.6876e-13
Slc47a1	0.0651249	0.765816	0.212005	13.755	0.000208267	0.00103261
Gm2296	0.0424774	0.761841	0.228735	13.5391	0.000233648	0.00113639
Rbm38	0.0831506	0.761558	0.171332	20.8559	4.95152e-06	3.8448e-05
Gm33508	0.0511264	0.759831	0.357366	4.55344	0.0328527	0.0706952
Vldlr	0.0975647	0.756404	0.174636	19.2372	1.15443e-05	8.26291e-05
Timp2	0.55021	0.755361	0.0866305	79.1455	5.77003e-19	3.11645e-17
Gm37202	0.0320125	0.753801	0.306176	6.07766	0.0136902	0.0347714
Frmd3	0.0462592	0.752856	0.263909	8.61464	0.00333472	0.0107769
Ckmt1	0.0357779	0.752618	0.275215	7.73758	0.00540832	0.016149
Scara3	0.171139	0.751136	0.126066	35.7769	2.21252e-09	3.43326e-08
Rnf157	0.0314193	0.750131	0.350139	4.63268	0.0313686	0.068132
Fgf1	0.121263	0.749995	0.160005	22.2262	2.4235e-06	2.05696e-05
Parp16	0.0806934	0.747223	0.192515	15.1536	9.91084e-05	0.000543265
Ccl2	0.146604	0.747066	0.256064	8.72675	0.00313575	0.010232
Plekha6	0.1965	0.745695	0.123261	36.9495	1.21227e-09	1.95887e-08
Meox1	0.0646317	0.742832	0.212699	12.9305	0.000323264	0.00150703
Plac8	0.144064	0.742669	0.223209	11.3644	0.000748658	0.00309336
Entrep1	0.13535	0.741932	0.136136	30.5513	3.2516e-08	4.16069e-07
Sh3kbp1	0.188432	0.741144	0.134261	31.123	2.42181e-08	3.16943e-07
H2bc18	0.0779006	0.739021	0.196813	14.149	0.000168883	0.000860345
Ifi27	0.889195	0.738849	0.0966308	60.693	6.67062e-15	2.329e-13
Csrp2	0.87094	0.737275	0.0936972	63.7804	1.39093e-15	5.18997e-14
Ucp2	0.868055	0.73587	0.0754932	98.3066	3.58371e-23	2.82535e-21
Col19a1	1.06642	0.733517	0.0909975	66.5355	3.43644e-16	1.3825e-14
Slc26a2	0.0956009	0.731678	0.187227	15.342	8.97e-05	0.000499378
Cd200	0.3892	0.731212	0.102544	52.6404	4.00561e-13	1.09689e-11
Samd12	0.0627928	0.73121	0.264829	7.71561	0.00547454	0.016292
Rhob	0.962381	0.730469	0.083111	78.7052	7.21072e-19	3.87319e-17
A430035B10Rik	0.0218283	0.727513	0.411091	3.16824	0.0750833	0.130375
Stk10	0.0220497	0.72735	0.370405	4.01742	0.0450326	0.0893267
Ahcy	0.0658674	0.725301	0.203584	12.7943	0.000347684	0.00160177
Nol3	0.0744805	0.722768	0.179633	18.2663	1.92074e-05	0.000129141
Wnt9a	0.0987203	0.721852	0.210093	11.8661	0.00057165	0.00245862
Gm33302	0.40419	0.721473	0.109053	44.9497	2.02164e-11	4.34364e-10
Pik3r3	0.234187	0.720313	0.152759	22.6094	1.98512e-06	1.71588e-05
Ptprv	0.0610559	0.71912	0.214312	11.2815	0.000782818	0.00320589
S100a6	4.95912	0.717927	0.084727	73.3314	1.0961e-17	5.127e-16
Pou2af3	0.0781356	0.717832	0.183874	16.5463	4.74769e-05	0.000286857
Mllt11	0.127375	0.717757	0.133374	31.2334	2.28791e-08	3.01436e-07
Dmac2l	0.107505	0.717555	0.184908	15.2917
Col18a1	0.591699	0.715879	0.0787797	84.6978	3.4764e-20	2.16466e-18
Nrarp	0.142119	0.715279	0.149572	23.5228	1.23441e-06	1.12466e-05
Pdgfb	0.118244	0.715078	0.183013	15.3343	9.00687e-05	0.00050086
Fblim1	0.103219	0.715032	0.157417	21.2614	4.00721e-06	3.19531e-05
Hspb2	0.062497	0.71431	0.196141	14.1614	0.000167777	0.000855603
Large2	0.166608	0.710863	0.117219	37.4017	9.61404e-10	1.56906e-08
Hspb1	8.91132	0.710034	0.0628618	130.019	4.05893e-30	5.66859e-28
0610040J01Rik	0.032533	0.709581	0.31321	5.19529	0.0226482	0.0522806
Cyb5r1	0.0934441	0.709516	0.157229	21.9639	2.77825e-06	2.31347e-05
Itgb6	0.034143	0.706245	0.279579	6.58285	0.0102966	0.027578
Gnao1	0.0166335	0.704983	0.454015	2.47524	0.115652	0.179462
Dll4	0.0261797	0.701728	0.406057	3.04103	0.0811843	0.138228
Postn	0.0332805	0.701589	0.373369	3.65454	0.0559166	0.105083
Col12a1	0.907614	0.701039	0.0888175	63.7178	1.43583e-15	5.33712e-14
Hspa1l	0.0317905	0.700913	0.309149	5.15472	0.0231833	0.0532018
A230020J21Rik	0.045531	0.700679	0.289102	5.91152	0.0150422	0.037619
H2ac8	0.0417258	0.700058	0.245931	8.28801	0.00399076	0.0125285
Gm11210	0.0247592	0.699873	0.357352	3.86635	0.0492637	0.0955179
Nrep	0.271727	0.699478	0.100996	48.7694	2.87902e-12	6.98395e-11
3100003L05Rik	0.031352	0.699216	0.302066	5.42092	0.0198968	0.0472115
Ciao2b	0.5516	0.6987	0.0816153	77.5372	1.30244e-18	6.73687e-17
Rad51b	0.657311	0.698282	0.0931017	57.7123	3.03394e-14	9.59864e-13
Fam220a.1	0.0475526	0.697927	0.238741	8.64399	0.00328143	0.0106328
Efcab15	0.0992653	0.697486	0.166737	18.5243	1.67753e-05	0.000114602
Fam20c	0.282526	0.697271	0.112201	39.2387	3.75031e-10	6.48904e-09
Gm56816	0.0668392	0.692396	0.201413	11.8302	0.000582767	0.00250204
Adtrp	0.0434114	0.691461	0.254138	8.03152	0.00459701	0.0141056
Myh14	0.190793	0.689799	0.121899	32.1051	1.46051e-08	1.99971e-07
Tdh	0.0604486	0.686149	0.206704	12.32	0.000448127	0.0019877
H4c16	0.601038	0.685169	0.143799	22.9587	1.65523e-06	1.45911e-05
Pcbp4	0.174853	0.684443	0.11754	35.9601	2.014e-09	3.15022e-08
H1f3	0.0911545	0.682911	0.213937	10.2328	0.00137964	0.00515966
Elf3	0.15637	0.682116	0.142911	23.57	1.20454e-06	1.10052e-05
Ccl27a	0.341066	0.681539	0.102028	47.2068	6.38797e-12	1.47402e-10
Pgm1	0.162935	0.68087	0.13404	28.2744	1.0528e-07	1.21227e-06
Oas2	0.12784	0.679028	0.163846	17.2464	3.28324e-05	0.000208557
Gm47922	0.0244454	0.679027	0.358086	3.65666	0.0558455	0.105018
Pou2af1	0.0223527	0.678014	0.412811	3.08605	0.0789665	0.135458
Gucd1	0.100456	0.676982	0.156048	19.0568	1.26884e-05	8.94961e-05
Dpp10	0.256287	0.675218	0.193348	12.4165	0.000425559	0.0019014
Gm27253	0.0567687	0.67421	0.238882	7.98111	0.0047268	0.0144764
Gm15943	0.524284	0.672794	0.129371	27.9444	1.24854e-07	1.41598e-06
Dmpk	0.262878	0.672281	0.109635	38.0875	6.76423e-10	1.12845e-08
2900060B14Rik	0.431208	0.667364	0.139103	23.2144	1.4491e-06	1.29848e-05
Prrx1	0.278941	0.66723	0.144353	21.614	3.33418e-06	2.71851e-05
Tmem64	0.624937	0.667133	0.0833393	66.3004	3.87181e-16	1.54493e-14
Dydc1	0.0138701	0.666376	0.657231	1.03345	0.309349	0.370294
Prtn3	0.0257282	0.666047	0.372525	3.21345	0.0730354	0.127813
H2-DMb1	0.910479	0.665066	0.0753407	81.0687	2.1801e-19	1.22487e-17
Nupr1	0.30999	0.66383	0.137639	23.6048	1.1829e-06	1.08176e-05
Fyb2	0.253013	0.663115	0.122207	29.6409	5.1997e-08	6.36996e-07
Mycl	0.117174	0.661464	0.151966	19.8915	8.19658e-06	6.06125e-05
Kctd5	0.193854	0.660831	0.119471	31.7694	1.73605e-08	2.3539e-07
Mmp11	0.0721134	0.659735	0.198649	11.2527	0.000795061	0.00324602
Cdkn2b	0.0591437	0.659324	0.215474	9.72216	0.00182059	0.00652903
Pof1b	0.0868784	0.659313	0.187628	12.5252	0.000401493	0.00180959
Gm56852	0.0449257	0.657244	0.25254	6.78028	0.00921707	0.0251342
Akap12	0.195409	0.65591	0.167675	15.7028	7.41131e-05	0.00042318
Hmbs	0.341448	0.655525	0.117467	31.4546	2.04163e-08	2.71921e-07
Gm12239	0.0140244	0.654948	0.650112	1.04322	0.307074	0.368166
E230029C05Rik	0.0681159	0.654736	0.204529	10.2649	0.00135584	0.00508622
Dbn1	0.0864625	0.65344	0.175489	14.4264	0.000145745	0.000759086
Ttn	0.256077	0.653147	0.175738	13.9799	0.000184773	0.00093336
Ccl5	0.182483	0.652711	0.201505	10.7197	0.00106	0.00413839
Arhgef10l	0.265892	0.652517	0.0990885	43.5497	4.13318e-11	8.4004e-10
Mm2pr	0.0854071	0.652112	0.196547	11.0355	0.000893846	0.00357539
Rnd1	0.0917281	0.650291	0.238571	7.49055	0.00620236	0.0180352
Rmst	0.0223977	0.650227	0.509254	1.671	0.196125	0.263006
Rgs10	0.109618	0.64661	0.158708	17.4272	2.98516e-05	0.000191741
Etfbkmt	0.108898	0.645072	0.159211	16.5944	4.62884e-05	0.000281066
Tanc1	0.863247	0.643758	0.061341	111.46	4.69114e-26	4.67965e-24
Tuft1	0.135069	0.641788	0.144402	19.9633	7.89425e-06	5.88218e-05
Il11ra1	1.53437	0.641617	0.0617486	111.35	4.95945e-26	4.89733e-24
H4c9	0.0686781	0.641293	0.198958	10.6014	0.00113	0.00436939
[truncated: 9,345 more rows]

## Sheet: mTEC II_Aire
GeneName	baseMean	log2FoldChange	lfcSE	stat	pvalue	padj
[truncated: 17,901 more rows]

[truncated: 7 more sheets: mTEC III_Post-Aire, Tuft like mTEC, Globet like mTEC, Microfold like mTEC, Ionocyte like mTEC, Neuroendocrine mTEC, aaTECs]
