# Supplementary material for: The cooperation between RNA binding proteins ZFP36L1 and ZFP36L2 controls thymic epithelial cell differentiation to promote thymus function.
Source: Research Square preprint supplement (doi:10.21203/rs.3.rs-6941685/v1), 2025-06-25
Supplement: Supplementary file 2 [file 27d6d290cb39066ad26ee04b.xlsx]

## Sheet: README
Column	Description
Term	Functional annotation in database
In.List	Number of genes in list of interest with this functional annotation
In.Annotation	Total number of genes with this functional annotation
P.value	P-value (uncorrected)
Adjusted.P.value	P-value (adjusted for multiple testing), use this one
Odds.Ratio	How to interpret whether or not the gene list is just random (<1 less than by chance, =1 equals chance, >1 more than by chance)
Combined.Score	Combined enrichr score
Genes	Enrichr genes in functional annotation
Genes.Species	Species genes in functional annotation (which are translated to Enrichr genes)

## Sheet: cTEC
ID	Description	GeneRatio	BgRatio	pvalue	p.adjust	qvalue	geneID	Count	Cluster	Direction
GO:0022409	positive regulation of cell-cell adhesion	42/871	354/28891	4.45218e-14	2.33071e-10	1.5114e-10	Ank3/H2-D1/H2-K1/Plpp3/Ap3b1/Arid1b/Kifap3/H2-T22/Cd47/Cyrib/Lgals9/Dennd6a/Smarcc2/Adk/Stat5b/Lgals8/Flot2/Magi1/Ptpn22/Il6st/Pdpn/B2m/Itga6/Gli3/Cd44/H2-Q4/Pde4d/Ccl19/H2-Q7/Stat5a/H2-Oa/Prkcq/H2-DMb2/Lgals1/H2-Q6/Alox15/Igfbp2/H2-Q2/H2-Eb2/Adam19/H2-M2/Zbtb16	42	GO_BP	down
GO:0045088	regulation of innate immune response	48/871	474/28891	2.84946e-13	7.45846e-10	4.83658e-10	Pcbp2/Stmp1/H2-D1/H2-K1/Ap3b1/Tap1/Znrf1/H2-T22/Rigi/Ankrd17/Med1/N4bp1/Lgals9/Ap1g1/Trim12c/Stat5b/Trim25/Ptpn22/Pik3r1/Stat2/Trim12a/Adar/Cadm1/Irf7/Prkce/Trim56/Serpinb9/H2-Q4/Grn/Mapkapk3/H2-M3/Samhd1/Gbp7/H2-Q7/Stat5a/Rps6ka3/Dhx58/Zbp1/Mfhas1/Apoe/Trim30a/H2-Q6/Ddx60/H2-Q2/Prkd1/Ifi211/H2-M2/Plscr2	48	GO_BP	down
GO:0031589	cell-substrate adhesion	40/871	368/28891	3.05247e-12	5.32656e-09	3.45411e-09	Rin2/Iqgap1/Braf/Bcr/Flna/Cd63/Zyx/Pik3r1/Tiam1/Ptprj/Itgb4/Pdpn/Prkce/Itga6/Npnt/Peak1/Ajuba/Ptprk/Ptpra/Ccn1/Efna5/Ptprz1/Actn1/Wdpcp/Sfrp1/Egflam/Itga3/Cdh11/Phldb2/Lamb3/Lgals1/Alox15/Fut1/Eda/Ptn/Antxr1/Angpt1/Itga1/Pcsk5/Sema3e	40	GO_BP	down
GO:0002833	positive regulation of response to biotic stimulus	42/871	413/28891	7.7668e-12	1.01648e-08	6.59156e-09	Stmp1/H2-D1/H2-K1/Ap3b1/Znrf1/H2-T22/Rigi/Ankrd17/Med1/Lgals9/Ap1g1/Trim12c/Rab34/Stat5b/Trim25/Ptpn22/Pik3r1/Trim12a/Cadm1/Irf7/Prkce/Trim56/H2-Q4/Prkca/Grn/Mapkapk3/H2-M3/Gbp7/H2-Q7/Stat5a/Rps6ka3/Dhx58/Zbp1/Mfhas1/Trim30a/H2-Q6/Ddx60/H2-Q2/Prkd1/Ifi211/H2-M2/Plscr2	42	GO_BP	down
GO:0031346	positive regulation of cell projection organization	44/871	463/28891	2.36766e-11	2.47894e-08	1.60752e-08	Auts2/Iqgap1/Qki/Braf/Bmpr2/Tox/Rapgef2/Flna/Fnbp1l/Ep300/Pik3r1/Tiam1/Tenm3/Cdh4/Hdac4/Itga6/Pias2/Cpeb1/Mfn1/Arhgap32/Fig4/Grn/Ccl19/Prkcq/Ccdc88a/Igf1r/Setx/Efna5/Camk2b/Ptprz1/Plxna2/Apoe/Plce1/Itga3/Serpinf1/Nlgn1/Robo1/Pak3/Grip1/Magi2/Ptn/Prkd1/Dpysl3/Robo2	44	GO_BP	down
GO:0045089	positive regulation of innate immune response	39/871	385/28891	4.90655e-11	4.28097e-08	2.77608e-08	Stmp1/H2-D1/H2-K1/Ap3b1/Znrf1/H2-T22/Rigi/Ankrd17/Med1/Lgals9/Ap1g1/Trim12c/Stat5b/Trim25/Ptpn22/Pik3r1/Trim12a/Cadm1/Irf7/Prkce/Trim56/H2-Q4/Mapkapk3/H2-M3/Gbp7/H2-Q7/Stat5a/Rps6ka3/Dhx58/Zbp1/Mfhas1/Trim30a/H2-Q6/Ddx60/H2-Q2/Prkd1/Ifi211/H2-M2/Plscr2	39	GO_BP	down
GO:0050767	regulation of neurogenesis	45/871	494/28891	5.74677e-11	4.29776e-08	2.78697e-08	Ttc3/Hook3/Hif1a/Qki/Braf/Notch2/Kifap3/Bmpr2/Rapgef2/Ep300/Nf2/Tiam1/Ywhah/Il6st/Cdh4/B2m/Hes6/Pias2/Cysltr2/Mfn1/Gli3/Arhgap32/Egfr/Ski/Ptpra/Fgf13/Ascl1/Tspo/Efna5/Camk2b/Ptprz1/Plxna2/Apoe/Trak2/Serpinf1/Epha7/Robo1/Pak3/Grip1/Ldlr/Ptn/Sema3a/Robo2/Sema3e/Vim	45	GO_BP	down
GO:0035264	multicellular organism growth	29/871	230/28891	8.84574e-11	5.4712e-08	3.5479e-08	Ncor1/Rbbp6/Kmt2c/Stat3/Atxn2/Ext1/Mbd5/Notch2/Kdm2a/Stat5b/Ep300/Plec/Sos1/Atm/Large1/Zfp950/Flvcr1/Pde4d/Stat5a/Ar/Rasal2/Pmp22/Ghr/Pkdcc/Zfp36l1/Pcdh15/H2-Q2/Unc79/Apba1	29	GO_BP	down
GO:0050863	regulation of T cell activation	40/871	411/28891	9.40607e-11	5.4712e-08	3.5479e-08	H2-D1/H2-K1/Ap3b1/Arid1b/Braf/H2-T22/Tox/Cd47/Cyrib/Lgals9/Smarcc2/Adk/Stat5b/Lgals8/Flot2/Ptpn22/Itch/Il6st/Sos1/B2m/Gli3/Cd44/H2-Q4/Il20rb/Ccl19/H2-Q7/Stat5a/H2-Oa/Prkcq/Drosha/Cblb/H2-DMb2/Lgals1/H2-Q6/Igfbp2/H2-Q2/H2-Eb2/Zeb1/H2-M2/Zbtb16	40	GO_BP	down
GO:0019884	antigen processing and presentation of exogenous antigen	15/871	60/28891	2.05991e-10	9.46062e-08	6.13492e-08	H2-D1/H2-K1/Ap3b1/H2-T22/Pikfyve/B2m/H2-Q4/H2-M3/H2-Q7/H2-Oa/H2-DMb2/H2-Q6/H2-Q2/H2-Eb2/H2-M2	15	GO_BP	down
GO:0072001	renal system development	36/871	352/28891	2.0877e-10	9.46062e-08	6.13492e-08	Smad1/Ext1/Anxa4/Notch2/Col4a1/Dync2h1/Pds5a/Odc1/Npnt/Greb1l/Gli3/Cd44/Zfp950/Myo1e/Pkd1/Adamts6/Wdpcp/Bicc1/Sfrp1/Pkd2/Fras1/Plce1/Itga3/Epha7/Robo1/Hs3st3a1/Fbn1/Invs/Gpc3/Basp1/Gli2/Angpt1/Zbtb16/Pcsk5/Schip1/Robo2	36	GO_BP	down
GO:0001822	kidney development	35/871	336/28891	2.26025e-10	9.46062e-08	6.13492e-08	Smad1/Ext1/Anxa4/Notch2/Dync2h1/Pds5a/Odc1/Npnt/Greb1l/Gli3/Cd44/Zfp950/Myo1e/Pkd1/Adamts6/Wdpcp/Bicc1/Sfrp1/Pkd2/Fras1/Plce1/Itga3/Epha7/Robo1/Hs3st3a1/Fbn1/Invs/Gpc3/Basp1/Gli2/Angpt1/Zbtb16/Pcsk5/Schip1/Robo2	35	GO_BP	down
GO:0016055	Wnt signaling pathway	42/871	460/28891	2.34934e-10	9.46062e-08	6.13492e-08	G3bp1/Rbms3/Gnaq/Rtf1/Plpp3/Mcc/Ext1/Mbd2/Usp34/Mapk14/Btrc/Daam1/Prkn/Kremen1/Stk3/Ddb1/Lrrk1/Tiam1/Bcl9l/Grk5/Rnf43/Wwox/Gli3/Egfr/Cd44/Ctnnd2/Arl6/Pkd1/Rnf213/Bicc1/Sfrp1/Pkd2/Apoe/Itga3/Amotl2/Tgfb1i1/Invs/Eda/Gpc3/Fzd2/Gpc5/Grb10	42	GO_BP	down
GO:0198738	cell-cell signaling by wnt	42/871	462/28891	2.68515e-10	1.00405e-07	6.51099e-08	G3bp1/Rbms3/Gnaq/Rtf1/Plpp3/Mcc/Ext1/Mbd2/Usp34/Mapk14/Btrc/Daam1/Prkn/Kremen1/Stk3/Ddb1/Lrrk1/Tiam1/Bcl9l/Grk5/Rnf43/Wwox/Gli3/Egfr/Cd44/Ctnnd2/Arl6/Pkd1/Rnf213/Bicc1/Sfrp1/Pkd2/Apoe/Itga3/Amotl2/Tgfb1i1/Invs/Eda/Gpc3/Fzd2/Gpc5/Grb10	42	GO_BP	down
GO:0002478	antigen processing and presentation of exogenous peptide antigen	14/871	53/28891	3.72745e-10	1.30088e-07	8.4358e-08	H2-D1/H2-K1/H2-T22/Pikfyve/B2m/H2-Q4/H2-M3/H2-Q7/H2-Oa/H2-DMb2/H2-Q6/H2-Q2/H2-Eb2/H2-M2	14	GO_BP	down
GO:0050870	positive regulation of T cell activation	31/871	277/28891	4.14884e-10	1.35745e-07	8.80263e-08	H2-D1/H2-K1/Ap3b1/Arid1b/H2-T22/Cd47/Cyrib/Lgals9/Smarcc2/Adk/Stat5b/Lgals8/Flot2/Ptpn22/Il6st/B2m/Gli3/H2-Q4/Ccl19/H2-Q7/Stat5a/H2-Oa/Prkcq/H2-DMb2/Lgals1/H2-Q6/Igfbp2/H2-Q2/H2-Eb2/H2-M2/Zbtb16	31	GO_BP	down
GO:0001667	ameboidal-type cell migration	42/871	471/28891	4.84701e-10	1.49259e-07	9.67901e-08	Hif1a/Plpp3/Rin2/Iqgap1/Svbp/Mcc/Braf/Bmpr2/Lgals8/Map3k3/Cd63/Tgfbr3/Krit1/Plec/Itgb4/Sp100/Prkce/Map2k3/Tns1/Prkca/Grn/Stat5a/Wdpcp/Glipr2/S100a2/Apoe/Pmp22/Itga3/Amotl2/Serpinf1/Akt3/Robo1/Pak3/Fut1/Hdac9/Prkd1/Cyp1b1/Sema3a/Angpt1/Schip1/Slc8a1/Sema3e	42	GO_BP	down
GO:0019882	antigen processing and presentation	21/871	134/28891	6.43035e-10	1.81933e-07	1.17978e-07	H2-D1/H2-K1/Ap3b1/Tap1/Ext1/H2-T22/Pikfyve/Rab34/B2m/H2-Q4/H2-M3/Ccl19/H2-Q7/H2-Oa/Psmb8/H2-DMb2/H2-Q6/H2-Q2/H2-Eb2/H2-M2/Fcer2a	21	GO_BP	down
GO:0051251	positive regulation of lymphocyte activation	36/871	367/28891	6.60309e-10	1.81933e-07	1.17978e-07	H2-D1/H2-K1/Ap3b1/Arid1b/H2-T22/Tox/Cd47/Cyrib/Lgals9/Ap1g1/Smarcc2/Adk/Rif1/Stat5b/Lgals8/Trp53bp1/Flot2/Ptpn22/Il6st/B2m/Gli3/Il15ra/H2-Q4/Ccl19/H2-Q7/Stat5a/H2-Oa/Prkcq/H2-DMb2/Lgals1/H2-Q6/Igfbp2/H2-Q2/H2-Eb2/H2-M2/Zbtb16	36	GO_BP	down
GO:1903039	positive regulation of leukocyte cell-cell adhesion	32/871	303/28891	9.45808e-10	2.47565e-07	1.60538e-07	H2-D1/H2-K1/Ap3b1/Arid1b/H2-T22/Cd47/Cyrib/Lgals9/Smarcc2/Adk/Stat5b/Lgals8/Flot2/Ptpn22/Il6st/B2m/Gli3/Cd44/H2-Q4/Ccl19/H2-Q7/Stat5a/H2-Oa/Prkcq/H2-DMb2/Lgals1/H2-Q6/Igfbp2/H2-Q2/H2-Eb2/H2-M2/Zbtb16	32	GO_BP	down
GO:0035329	hippo signaling	12/871	40/28891	1.34362e-09	3.34946e-07	2.17202e-07	Mapk14/Wwc1/Tead1/Stk3/Nf2/Sav1/Frmd6/Map2k3/Ajuba/Wwc2/Amotl2/Schip1	12	GO_BP	down
GO:0048638	regulation of developmental growth	37/871	405/28891	2.72889e-09	6.49352e-07	4.21085e-07	Ncor1/Ttc3/Stat3/Nr3c1/Atxn2/Mbd5/Jarid2/Mycbp2/Bmpr2/Mapk14/Wwc1/Stat5b/Ep300/Prkn/Tgfbr3/Stk3/Sav1/Cdh4/Arhgap32/Grn/Flvcr1/Fgf13/Stat5a/Ar/Wwc2/Igf1r/Efna5/Kcnk2/Apoe/Epha7/Ghr/Colq/Sema3a/Syt1/Zfpm2/Sema3e/C3	37	GO_BP	down
GO:0031345	negative regulation of cell projection organization	26/871	221/28891	3.69037e-09	8.04962e-07	5.21993e-07	Ttc3/Thoc2/H2-D1/H2-K1/Map4/Rapgef2/Flna/Kremen1/Lpar1/Ywhah/B2m/Il15ra/Fgf13/Ptprz1/Xylt1/Apoe/Pmp22/Itga3/Trak2/Epha7/Nlgn1/Lgals1/Dpysl3/Sema3a/Sema3e/Vim	26	GO_BP	down
GO:0046631	alpha-beta T cell activation	26/871	221/28891	3.69037e-09	8.04962e-07	5.21993e-07	Ncor1/H2-D1/H2-K1/Stat3/Ap3b1/Braf/H2-T22/Tox/Lgals9/Ptpn22/Itch/Gli3/Gadd45g/Cd44/H2-Q4/H2-M3/Ccl19/H2-Q7/Prkcq/Rora/Cblb/Psmb11/H2-Q6/H2-Q2/H2-M2/Zbtb16	26	GO_BP	down
GO:0010976	positive regulation of neuron projection development	27/871	239/28891	4.51568e-09	9.45583e-07	6.13181e-07	Iqgap1/Qki/Braf/Tox/Rapgef2/Flna/Ep300/Tiam1/Tenm3/Itga6/Cpeb1/Mfn1/Fig4/Grn/Igf1r/Setx/Camk2b/Ptprz1/Apoe/Itga3/Serpinf1/Nlgn1/Pak3/Magi2/Ptn/Prkd1/Dpysl3	27	GO_BP	down
GO:0010977	negative regulation of neuron projection development	22/871	165/28891	5.75641e-09	1.07799e-06	6.99046e-07	Ttc3/Thoc2/H2-D1/H2-K1/Flna/Kremen1/Lpar1/B2m/Il15ra/Fgf13/Ptprz1/Xylt1/Apoe/Pmp22/Trak2/Epha7/Nlgn1/Lgals1/Dpysl3/Sema3a/Sema3e/Vim	22	GO_BP	down
GO:0002520	immune system development	28/871	258/28891	5.7601e-09	1.07799e-06	6.99046e-07	H2-D1/H2-K1/Braf/Jarid2/H2-T22/Nfkb2/Tox/Rif1/Stat5b/Trp53bp1/Itch/Adar/Pdpn/Atm/Samd9l/H2-Q4/Flvcr1/Nbn/Samhd1/H2-Q7/Stat5a/Cblb/Swap70/Aire/H2-Q6/H2-Q2/Lrrc17/H2-M2	28	GO_BP	down
GO:0050867	positive regulation of cell activation	39/871	454/28891	5.76577e-09	1.07799e-06	6.99046e-07	H2-D1/H2-K1/Ap3b1/Arid1b/H2-T22/Tox/Cd47/Cyrib/Lgals9/Flna/Ap1g1/Smarcc2/Adk/Rif1/Stat5b/Lgals8/Trp53bp1/Flot2/Ptpn22/Ptprj/Il6st/Pdpn/B2m/Gli3/Il15ra/H2-Q4/Ccl19/H2-Q7/Stat5a/H2-Oa/Prkcq/H2-DMb2/Lgals1/H2-Q6/Igfbp2/H2-Q2/H2-Eb2/H2-M2/Zbtb16	39	GO_BP	down
GO:0002477	antigen processing and presentation of exogenous peptide antigen via MHC class Ib	10/871	29/28891	7.01617e-09	1.26654e-06	8.21312e-07	H2-D1/H2-K1/H2-T22/B2m/H2-Q4/H2-M3/H2-Q7/H2-Q6/H2-Q2/H2-M2	10	GO_BP	down
GO:0042269	regulation of natural killer cell mediated cytotoxicity	16/871	89/28891	9.17941e-09	1.5511e-06	1.00584e-06	H2-D1/H2-K1/Tap1/H2-T22/Lgals9/Ap1g1/Stat5b/Cadm1/Serpinb9/H2-Q4/H2-M3/H2-Q7/Stat5a/H2-Q6/H2-Q2/H2-M2	16	GO_BP	down
GO:0034329	cell junction assembly	40/871	481/28891	9.18512e-09	1.5511e-06	1.00584e-06	Nectin1/Setd5/Pkp4/Iqgap1/Bcr/Mycbp2/Rapgef2/Pik3r1/Patj/Ptprj/Plec/Itgb4/Cadm1/Cdh4/Tns1/Peak1/Large1/Ajuba/Ptprk/Pclo/Prkca/Ptpra/Fgf13/Ctnnd2/Efna5/Actn1/Wdpcp/Adgrl2/Ophn1/Pmp22/Cdh11/Epha7/Phldb2/Nlgn1/Robo1/Lgi2/Magi2/Mdga2/Colq/Lingo2	40	GO_BP	down
GO:1903037	regulation of leukocyte cell-cell adhesion	36/871	407/28891	1.04298e-08	1.70625e-06	1.10645e-06	H2-D1/H2-K1/Ap3b1/Arid1b/H2-T22/Cd47/Cyrib/Lgals9/Smarcc2/Adk/Stat5b/Lgals8/Flot2/Ptpn22/Itch/Il6st/B2m/Gli3/Cd44/H2-Q4/Gstp1/Il20rb/Ccl19/H2-Q7/Stat5a/H2-Oa/Prkcq/Cblb/H2-DMb2/Lgals1/H2-Q6/Igfbp2/H2-Q2/H2-Eb2/H2-M2/Zbtb16	36	GO_BP	down
GO:0009615	response to virus	35/871	389/28891	1.08162e-08	1.71585e-06	1.11268e-06	Pcbp2/G3bp1/Hif1a/Ddx17/Ext1/Senp7/Gbf1/Crebbp/Rigi/Mapk14/Lgals9/Trim12c/Lgals8/Trim25/Ptpn22/Itch/Stat2/Trim12a/Adar/Shfl/Irf7/Bnip3/Bcl2l1/Trim56/Samhd1/Gbp7/Ccl19/Ifngr1/Dhx58/Zbp1/Ifi27l2a/Trim30a/Ddx60/Gli2/Plscr2	35	GO_BP	down
GO:0031341	regulation of cell killing	21/871	157/28891	1.20165e-08	1.83274e-06	1.18848e-06	H2-D1/H2-K1/Tap1/H2-T22/Cyrib/Lgals9/Oga/Ap1g1/Stat5b/Cadm1/B2m/Bcl2l1/Serpinb9/H2-Q4/H2-M3/H2-Q7/Stat5a/H2-Q6/H2-Q2/H2-M2/Fcer2a	21	GO_BP	down
GO:0030098	lymphocyte differentiation	40/871	486/28891	1.22533e-08	1.83274e-06	1.18848e-06	Ncor1/Stat3/Ap3b1/Top2b/Arid1b/Braf/Notch2/Tox/Lgals9/Smarcc2/Stat5b/Lgals8/Ep300/Ptpn22/Pik3r1/Fnip1/Ptprj/Sos1/B2m/Atm/Gli3/Il15ra/Gadd45g/Cd44/Ccl19/Stat5a/H2-Oa/Rora/Drosha/Psmb11/Plcl2/Sfrp1/Zfp36l2/Lgals1/Dock10/Zfp36l1/Aire/Hdac9/Zeb1/Zbtb16	40	GO_BP	down
GO:0007160	cell-matrix adhesion	26/871	235/28891	1.34436e-08	1.95492e-06	1.2677e-06	Rin2/Iqgap1/Bcr/Cd63/Zyx/Pik3r1/Tiam1/Ptprj/Itgb4/Itga6/Npnt/Peak1/Ajuba/Ptprk/Ptpra/Efna5/Actn1/Wdpcp/Itga3/Cdh11/Phldb2/Fut1/Eda/Itga1/Pcsk5/Sema3e	26	GO_BP	down
GO:0032816	positive regulation of natural killer cell activation	13/871	58/28891	1.40027e-08	1.9812e-06	1.28474e-06	H2-D1/H2-K1/H2-T22/Tox/Ap1g1/Stat5b/Il15ra/H2-Q4/H2-Q7/Stat5a/H2-Q6/H2-Q2/H2-M2	13	GO_BP	down
GO:0032814	regulation of natural killer cell activation	15/871	80/28891	1.46652e-08	2.02033e-06	1.31012e-06	H2-D1/H2-K1/H2-T22/Tox/Lgals9/Ap1g1/Stat5b/Ptpn22/Il15ra/H2-Q4/H2-Q7/Stat5a/H2-Q6/H2-Q2/H2-M2	15	GO_BP	down
GO:0002715	regulation of natural killer cell mediated immunity	16/871	92/28891	1.50721e-08	2.02313e-06	1.31194e-06	H2-D1/H2-K1/Tap1/H2-T22/Lgals9/Ap1g1/Stat5b/Cadm1/Serpinb9/H2-Q4/H2-M3/H2-Q7/Stat5a/H2-Q6/H2-Q2/H2-M2	16	GO_BP	down
GO:0046777	protein autophosphorylation	26/871	238/28891	1.74902e-08	2.28902e-06	1.48436e-06	Iqgap1/Bcr/Dyrk1a/Rassf2/Impact/Mapk14/Brd4/Pikfyve/Mvp/Map3k3/Grk5/Atm/Atr/Peak1/Egfr/Prkca/Rad50/Nbn/Mapkapk3/Sik2/Igf1r/Camk2b/Stk33/Epha7/Prkd1/Camk4	26	GO_BP	down
GO:0032640	tumor necrosis factor production	25/871	223/28891	1.95425e-08	2.49524e-06	1.61809e-06	H2-D1/H2-K1/Stat3/H2-T22/Rigi/Cd47/Mapk14/Lgals9/Zbtb20/Ptpn22/Pik3r1/Ptprj/H2-Q4/Gstp1/Ccn1/Ccl19/H2-Q7/Ifngr1/Tspo/Trim30a/H2-Q6/H2-Q2/Lpl/Angpt1/H2-M2	25	GO_BP	down
GO:0007249	canonical NF-kappaB signal transduction	27/871	258/28891	2.32832e-08	2.90208e-06	1.88191e-06	Usp25/Otud7b/Tank/Rassf2/Ankrd17/Nfkb2/Brd4/Btrc/Trim12c/Cpne1/Prkn/Trim25/Traf5/Trim12a/Prkce/Myo18a/Ajuba/Gstp1/Irak1bp1/Gbp7/Ccl19/Rora/Edaradd/Trim30a/Eda/Prkd1/Angpt1	27	GO_BP	down
GO:0010631	epithelial cell migration	31/871	328/28891	2.40952e-08	2.93346e-06	1.90226e-06	Hif1a/Plpp3/Rin2/Svbp/Mcc/Bmpr2/Lgals8/Map3k3/Cd63/Tgfbr3/Krit1/Sp100/Prkce/Map2k3/Prkca/Grn/Stat5a/Wdpcp/Glipr2/S100a2/Apoe/Itga3/Serpinf1/Akt3/Robo1/Fut1/Hdac9/Prkd1/Cyp1b1/Sema3a/Angpt1	31	GO_BP	down
GO:0048002	antigen processing and presentation of peptide antigen	15/871	83/28891	2.47197e-08	2.94108e-06	1.9072e-06	H2-D1/H2-K1/Tap1/H2-T22/Pikfyve/B2m/H2-Q4/H2-M3/H2-Q7/H2-Oa/H2-DMb2/H2-Q6/H2-Q2/H2-Eb2/H2-M2	15	GO_BP	down
GO:0071706	tumor necrosis factor superfamily cytokine production	25/871	226/28891	2.55478e-08	2.94216e-06	1.9079e-06	H2-D1/H2-K1/Stat3/H2-T22/Rigi/Cd47/Mapk14/Lgals9/Zbtb20/Ptpn22/Pik3r1/Ptprj/H2-Q4/Gstp1/Ccn1/Ccl19/H2-Q7/Ifngr1/Tspo/Trim30a/H2-Q6/H2-Q2/Lpl/Angpt1/H2-M2	25	GO_BP	down
GO:0016032	viral process	31/871	329/28891	2.58527e-08	2.94216e-06	1.9079e-06	Pcbp2/Nectin1/Nedd4/Ddx6/Top2b/Crebbp/N4bp1/Brd4/Pikfyve/Trim12c/Ep300/Prkn/Trim25/Srpk1/Ddb1/Trim12a/Adar/Sp100/Shfl/Bcl2l1/Trim56/Rad50/Nbn/Gbp7/Ciita/Pou2f3/Apoe/Lgals1/Trim30a/Pcsk5/Plscr2	31	GO_BP	down
GO:0090132	epithelium migration	31/871	330/28891	2.77297e-08	3.01877e-06	1.95758e-06	Hif1a/Plpp3/Rin2/Svbp/Mcc/Bmpr2/Lgals8/Map3k3/Cd63/Tgfbr3/Krit1/Sp100/Prkce/Map2k3/Prkca/Grn/Stat5a/Wdpcp/Glipr2/S100a2/Apoe/Itga3/Serpinf1/Akt3/Robo1/Fut1/Hdac9/Prkd1/Cyp1b1/Sema3a/Angpt1	31	GO_BP	down
GO:0048736	appendage development	24/871	211/28891	2.82559e-08	3.01877e-06	1.95758e-06	Gnaq/Chst11/Ext1/Notch2/Bmpr2/Med1/Dync2h1/Trp63/Kremen1/Mbnl1/Itgb4/Itga6/Gli3/Large1/Ski/Flvcr1/Wdpcp/Plxna2/Fras1/Pkdcc/Gpc3/Gli2/Zbtb16/Pcsk5	24	GO_BP	down
GO:0060173	limb development	24/871	211/28891	2.82559e-08	3.01877e-06	1.95758e-06	Gnaq/Chst11/Ext1/Notch2/Bmpr2/Med1/Dync2h1/Trp63/Kremen1/Mbnl1/Itgb4/Itga6/Gli3/Large1/Ski/Flvcr1/Wdpcp/Plxna2/Fras1/Pkdcc/Gpc3/Gli2/Zbtb16/Pcsk5	24	GO_BP	down
GO:0060740	prostate gland epithelium morphogenesis	10/871	33/28891	2.9062e-08	3.04279e-06	1.97315e-06	Trp63/Fem1b/Cd44/Stat5a/Ar/Igf1r/Sfrp1/Tnc/Cyp7b1/Gli2	10	GO_BP	down
GO:0010810	regulation of cell-substrate adhesion	25/871	228/28891	3.0461e-08	3.12673e-06	2.02759e-06	Rin2/Iqgap1/Braf/Flna/Pik3r1/Ptprj/Pdpn/Prkce/Itga6/Npnt/Peak1/Ptpra/Ccn1/Efna5/Ptprz1/Wdpcp/Egflam/Itga3/Phldb2/Lgals1/Alox15/Fut1/Ptn/Pcsk5/Sema3e	25	GO_BP	down
GO:0090130	tissue migration	31/871	332/28891	3.18725e-08	3.2087e-06	2.08075e-06	Hif1a/Plpp3/Rin2/Svbp/Mcc/Bmpr2/Lgals8/Map3k3/Cd63/Tgfbr3/Krit1/Sp100/Prkce/Map2k3/Prkca/Grn/Stat5a/Wdpcp/Glipr2/S100a2/Apoe/Itga3/Serpinf1/Akt3/Robo1/Fut1/Hdac9/Prkd1/Cyp1b1/Sema3a/Angpt1	31	GO_BP	down
GO:0007159	leukocyte cell-cell adhesion	37/871	447/28891	3.72294e-08	3.67728e-06	2.38461e-06	H2-D1/H2-K1/Ap3b1/Ext1/Arid1b/H2-T22/Cd47/Cyrib/Lgals9/Smarcc2/Adk/Stat5b/Lgals8/Flot2/Ptpn22/Itch/Il6st/B2m/Gli3/Cd44/H2-Q4/Gstp1/Il20rb/Ccl19/H2-Q7/Stat5a/H2-Oa/Prkcq/Cblb/H2-DMb2/Lgals1/H2-Q6/Igfbp2/H2-Q2/H2-Eb2/H2-M2/Zbtb16	37	GO_BP	down
GO:0046640	regulation of alpha-beta T cell proliferation	14/871	74/28891	3.93194e-08	3.71756e-06	2.41072e-06	H2-D1/H2-K1/H2-T22/Lgals9/Ptpn22/Itch/Cd44/H2-Q4/H2-Q7/Prkcq/Cblb/H2-Q6/H2-Q2/H2-M2	14	GO_BP	down
GO:0060512	prostate gland morphogenesis	10/871	34/28891	4.00607e-08	3.71756e-06	2.41072e-06	Trp63/Fem1b/Cd44/Stat5a/Ar/Igf1r/Sfrp1/Tnc/Cyp7b1/Gli2	10	GO_BP	down
GO:0045954	positive regulation of natural killer cell mediated cytotoxicity	13/871	63/28891	4.04229e-08	3.71756e-06	2.41072e-06	H2-D1/H2-K1/H2-T22/Ap1g1/Stat5b/Cadm1/H2-Q4/H2-M3/H2-Q7/Stat5a/H2-Q6/H2-Q2/H2-M2	13	GO_BP	down
GO:0051962	positive regulation of nervous system development	34/871	391/28891	4.04777e-08	3.71756e-06	2.41072e-06	Hif1a/Qki/Braf/Notch2/Bmpr2/Ep300/Pik3r1/Tiam1/Il6st/Cdh4/Pias2/Mfn1/Gli3/Arhgap32/Egfr/Prkca/Ptpra/Ascl1/Tspo/Efna5/Camk2b/Ptprz1/Adgrl2/Plxna2/Apoe/Serpinf1/Nlgn1/Robo1/Pak3/Grip1/Ptn/Robo2/Lingo2/Vim	34	GO_BP	down
GO:0050727	regulation of inflammatory response	35/871	411/28891	4.31341e-08	3.87652e-06	2.5138e-06	H2-D1/H2-K1/Stat3/Bcr/H2-T22/Cd47/Lgals9/Brd4/Stat5b/Gsdmd/Atm/Abcc1/Cd44/H2-Q4/Prkca/Grn/Gstp1/Il20rb/H2-Q7/Stat5a/Rora/Drosha/Zbp1/Tnc/Mfhas1/Apoe/Pmp22/Lgals1/H2-Q6/Alox15/Ldlr/H2-Q2/Lpl/H2-M2/C3	35	GO_BP	down
GO:0001763	morphogenesis of a branching structure	26/871	249/28891	4.41657e-08	3.87652e-06	2.5138e-06	Ext1/Rere/Col4a1/Med1/Btrc/Trp63/Fem1b/Npnt/Greb1l/Gli3/Cd44/Fgf13/Ctnnd2/Pkd1/Adm/Ar/Sfrp1/Hhip/Tnc/Epha7/Hs3st3a1/Gpc3/Sema3a/Gli2/Angpt1/Sema3e	26	GO_BP	down
GO:0032680	regulation of tumor necrosis factor production	24/871	216/28891	4.443e-08	3.87652e-06	2.5138e-06	H2-D1/H2-K1/Stat3/H2-T22/Rigi/Cd47/Lgals9/Zbtb20/Ptpn22/Pik3r1/Ptprj/H2-Q4/Gstp1/Ccn1/Ccl19/H2-Q7/Ifngr1/Tspo/Trim30a/H2-Q6/H2-Q2/Lpl/Angpt1/H2-M2	24	GO_BP	down
GO:0010632	regulation of epithelial cell migration	26/871	250/28891	4.79081e-08	4.05058e-06	2.62668e-06	Hif1a/Plpp3/Rin2/Svbp/Mcc/Bmpr2/Map3k3/Cd63/Tgfbr3/Krit1/Sp100/Prkce/Map2k3/Prkca/Grn/Stat5a/Glipr2/Apoe/Itga3/Serpinf1/Akt3/Fut1/Hdac9/Prkd1/Sema3a/Angpt1	26	GO_BP	down
GO:0002696	positive regulation of leukocyte activation	36/871	432/28891	4.79725e-08	4.05058e-06	2.62668e-06	H2-D1/H2-K1/Ap3b1/Arid1b/H2-T22/Tox/Cd47/Cyrib/Lgals9/Ap1g1/Smarcc2/Adk/Rif1/Stat5b/Lgals8/Trp53bp1/Flot2/Ptpn22/Il6st/B2m/Gli3/Il15ra/H2-Q4/Ccl19/H2-Q7/Stat5a/H2-Oa/Prkcq/H2-DMb2/Lgals1/H2-Q6/Igfbp2/H2-Q2/H2-Eb2/H2-M2/Zbtb16	36	GO_BP	down
GO:0031343	positive regulation of cell killing	17/871	113/28891	5.06696e-08	4.2104e-06	2.73032e-06	H2-D1/H2-K1/H2-T22/Cyrib/Oga/Ap1g1/Stat5b/Cadm1/B2m/H2-Q4/H2-M3/H2-Q7/Stat5a/H2-Q6/H2-Q2/H2-M2/Fcer2a	17	GO_BP	down
GO:1903555	regulation of tumor necrosis factor superfamily cytokine production	24/871	219/28891	5.78897e-08	4.72693e-06	3.06527e-06	H2-D1/H2-K1/Stat3/H2-T22/Rigi/Cd47/Lgals9/Zbtb20/Ptpn22/Pik3r1/Ptprj/H2-Q4/Gstp1/Ccn1/Ccl19/H2-Q7/Ifngr1/Tspo/Trim30a/H2-Q6/H2-Q2/Lpl/Angpt1/H2-M2	24	GO_BP	down
GO:0003002	regionalization	37/871	455/28891	5.86916e-08	4.72693e-06	3.06527e-06	Hif1a/Ext1/Notch2/Kdm2a/Bmpr2/Dync2h1/Pds5a/Bptf/Trp63/Prkacb/Ep300/Map3k4/Scmh1/Tshz1/Hipk2/Hes6/Atm/Gli3/Ski/Dync2li1/Ascl1/Ar/Bicc1/Sfrp1/Plxna2/Pkd2/Hhip/Robo1/Invs/Gpc3/Sema3a/Gli2/Dmrt3/Zbtb16/Pcsk5/Robo2/C3	37	GO_BP	down
GO:0002717	positive regulation of natural killer cell mediated immunity	13/871	65/28891	5.99798e-08	4.75748e-06	3.08508e-06	H2-D1/H2-K1/H2-T22/Ap1g1/Stat5b/Cadm1/H2-Q4/H2-M3/H2-Q7/Stat5a/H2-Q6/H2-Q2/H2-M2	13	GO_BP	down
GO:0022612	gland morphogenesis	20/871	158/28891	6.80343e-08	5.31582e-06	3.44714e-06	Nr3c1/Notch2/Med1/Btrc/Trp63/Fem1b/Gli3/Egfr/Cd44/Stat5a/Ar/Igf1r/Sfrp1/Tnc/Cyp7b1/Robo1/Eda/Ptn/Sema3a/Gli2	20	GO_BP	down
GO:0007389	pattern specification process	39/871	498/28891	7.03144e-08	5.41317e-06	3.51028e-06	Hif1a/Ext1/Notch2/Kdm2a/Bmpr2/Dync2h1/Pds5a/Bptf/Trp63/Prkacb/Ep300/Map3k4/Scmh1/Tshz1/Hipk2/Hes6/Atm/Gli3/Ski/Dync2li1/Ascl1/Ar/Bicc1/Sfrp1/Plxna2/Pkd2/Hhip/Robo1/Invs/Mdga2/Zeb1/Gpc3/Sema3a/Gli2/Dmrt3/Zbtb16/Pcsk5/Robo2/C3	39	GO_BP	down
GO:0030099	myeloid cell differentiation	38/871	480/28891	7.82077e-08	5.93359e-06	3.84775e-06	Ncor1/Kmt2e/Hif1a/Stat3/Ap3b1/Nr3c1/Notch2/Rassf2/Med1/Mapk14/Flna/Kat6a/Stat5b/Ep300/Tgfbr3/Cnot4/Lrrk1/Pik3r1/Adar/Tjp2/B2m/Large1/Prkca/Flvcr1/Cdin1/Ccl19/Stat5a/Actn1/Sfrp1/Mfhas1/Fbn1/Zfp36l1/Rabgap1l/Gpc3/Lrrc17/Cbfa2t3/Zbtb16/Camk4	38	GO_BP	down
GO:2000566	positive regulation of CD8-positive, alpha-beta T cell proliferation	9/871	28/28891	8.14628e-08	6.09226e-06	3.95064e-06	H2-D1/H2-K1/H2-T22/Ptpn22/H2-Q4/H2-Q7/H2-Q6/H2-Q2/H2-M2	9	GO_BP	down
GO:0002524	hypersensitivity	11/871	46/28891	8.92996e-08	6.58427e-06	4.2697e-06	H2-D1/H2-K1/Ext1/H2-T22/H2-Q4/Il20rb/H2-Q7/H2-Q6/H2-Q2/H2-M2/C3	11	GO_BP	down
GO:0046633	alpha-beta T cell proliferation	14/871	79/28891	9.33167e-08	6.7849e-06	4.3998e-06	H2-D1/H2-K1/H2-T22/Lgals9/Ptpn22/Itch/Cd44/H2-Q4/H2-Q7/Prkcq/Cblb/H2-Q6/H2-Q2/H2-M2	14	GO_BP	down
GO:1901652	response to peptide	37/871	464/28891	9.65036e-08	6.84328e-06	4.43765e-06	Stat3/Mbd5/Braf/Ncoa2/Tcf12/Mapk14/Ccnd3/Stat5b/Gkap1/Tgfbr3/Ptpn22/Pik3r1/Stat2/Ptprj/Stxbp4/Sos1/Scap/Abcc1/Cpeb1/Prkca/Ptpra/Sik2/Stat5a/Prkcq/Igf1r/Serpina3i/Serpinf1/Akt3/Ghr/Zfp36l1/Hdac9/Myo5a/Serpina3g/Prkd1/Lpl/Grb10/Vim	37	GO_BP	down
GO:0032817	regulation of natural killer cell proliferation	10/871	37/28891	9.80412e-08	6.84328e-06	4.43765e-06	H2-D1/H2-K1/H2-T22/Stat5b/Ptpn22/H2-Q4/H2-Q7/H2-Q6/H2-Q2/H2-M2	10	GO_BP	down
GO:0042270	protection from natural killer cell mediated cytotoxicity	10/871	37/28891	9.80412e-08	6.84328e-06	4.43765e-06	H2-D1/H2-K1/Tap1/H2-T22/Serpinb9/H2-Q4/H2-Q7/H2-Q6/H2-Q2/H2-M2	10	GO_BP	down
GO:0032102	negative regulation of response to external stimulus	38/871	485/28891	1.0211e-07	6.9597e-06	4.51315e-06	Pcbp2/H2-D1/H2-K1/Stat3/Tap1/Bcr/H2-T22/Lgals9/Kremen1/Ptpn22/Itch/Stat2/Adar/Cd44/Serpinb9/H2-Q4/Grn/Gstp1/Samhd1/Il20rb/H2-Q7/Mmp28/Dhx58/Rora/Pros1/Xylt1/Mfhas1/Apoe/Phldb2/Robo1/Trim30a/H2-Q6/Ldlr/H2-Q2/Sema3a/H2-M2/Robo2/Sema3e	38	GO_BP	down
GO:0018105	peptidyl-serine phosphorylation	30/871	331/28891	1.02368e-07	6.9597e-06	4.51315e-06	Braf/Dyrk1a/Rassf2/Mapk14/Pikfyve/Prkacb/Srpk1/Fnip1/Hipk2/Prkce/Atm/Atr/Egfr/Cd44/Prkca/Map3k10/Pde4d/Pdk3/Mapkapk3/Pkd1/Prkcq/Rps6ka3/Camk2b/Stox1/Akt3/Sgk3/Prkd1/Dclk1/Angpt1/Camk4	30	GO_BP	down
GO:0150115	cell-substrate junction organization	16/871	105/28891	1.039e-07	6.97329e-06	4.52196e-06	Iqgap1/Bcr/Pik3r1/Ptprj/Plec/Itgb4/Tns1/Peak1/Ajuba/Ptprk/Ptpra/Efna5/Actn1/Wdpcp/Cdh11/Phldb2	16	GO_BP	down
GO:0031098	stress-activated protein kinase signaling cascade	26/871	261/28891	1.13791e-07	7.54042e-06	4.88973e-06	Ncor1/Usp25/Mid1/Rassf2/Mapk14/Map3k3/Stk3/Ptpn22/Map3k4/Itch/Hipk2/Map2k3/Fgd4/Gadd45g/Egfr/Map3k10/Gstp1/Fgf14/Ccl19/Igf1r/Sfrp1/Mfhas1/Sh3rf3/Map2k6/Xdh/Zfp36l1	26	GO_BP	down
GO:0098742	cell-cell adhesion via plasma-membrane adhesion molecules	23/871	211/28891	1.20038e-07	7.85501e-06	5.09373e-06	Nectin1/Kifap3/Mapk14/Lgals9/Scarf2/Tenm3/Cadm1/Alcam/Cdh4/Ajuba/Efna5/Dsg2/Itga3/Cdh11/Nlgn1/Robo1/Lgals1/Magi2/Pcdh15/Mdga2/Cdhr1/Lrrc4c/Robo2	23	GO_BP	down
GO:0051235	maintenance of location	32/871	373/28891	1.37419e-07	8.88135e-06	5.75928e-06	Ank3/Lgals9/Flna/Tmsb10/Vps13a/Stat5b/Plcb4/Abcg1/Gaa/Sp100/Prkce/Mospd2/Pde4d/Ccl19/Pkd1/Stat5a/Ccdc88a/Tspo/Rnf213/Arhgap21/Trpm2/Srgn/Pkd2/Apoe/Plce1/Syne1/Fbn1/Myo5a/Prkd1/Lpl/Slc8a1/C3	32	GO_BP	down
GO:0019885	antigen processing and presentation of endogenous peptide antigen via MHC class I	11/871	48/28891	1.43153e-07	9.04927e-06	5.86817e-06	H2-D1/H2-K1/Tap1/H2-T22/B2m/H2-Q4/H2-M3/H2-Q7/H2-Q6/H2-Q2/H2-M2	11	GO_BP	down
GO:1902903	regulation of supramolecular fiber organization	33/871	393/28891	1.44935e-07	9.04927e-06	5.86817e-06	Mid1/Eml4/Braf/Dyrk1a/Synpo2/Cd47/Cyrib/Flna/Cdk5rap2/Tmsb10/Pde4dip/Washc2/Ep300/Prkn/Nf2/Pik3r1/Washc4/Lpar1/Prkce/Flii/Fgf13/Shroom2/Prkcq/Ccdc88a/Togaram1/Apoe/Lmod1/Phldb2/Swap70/Pak3/Alox15/Ldlr/Prkd1	33	GO_BP	down
GO:0035330	regulation of hippo signaling	8/871	22/28891	1.45203e-07	9.04927e-06	5.86817e-06	Mapk14/Wwc1/Nf2/Frmd6/Map2k3/Ajuba/Wwc2/Schip1	8	GO_BP	down
GO:1903706	regulation of hemopoiesis	36/871	452/28891	1.47841e-07	9.10526e-06	5.90448e-06	Hif1a/Stat3/Ap3b1/Arid1b/Braf/Notch2/Rassf2/Med1/Tox/Mapk14/Lgals9/Smarcc2/Kat6a/Stat5b/Mysm1/Cnot4/Pik3r1/Tjp2/Sos1/B2m/Gli3/Il15ra/Cd44/Prkca/Ccl19/Stat5a/H2-Oa/Drosha/Sfrp1/Zfp36l2/Fbn1/Zfp36l1/Zeb1/Ptn/Lrrc17/Zbtb16	36	GO_BP	down
GO:0001910	regulation of leukocyte mediated cytotoxicity	18/871	136/28891	1.54377e-07	9.39722e-06	6.09381e-06	H2-D1/H2-K1/Tap1/H2-T22/Cyrib/Lgals9/Ap1g1/Stat5b/Cadm1/B2m/Serpinb9/H2-Q4/H2-M3/H2-Q7/Stat5a/H2-Q6/H2-Q2/H2-M2	18	GO_BP	down
GO:0051403	stress-activated MAPK cascade	25/871	248/28891	1.58146e-07	9.4079e-06	6.10074e-06	Ncor1/Mid1/Rassf2/Mapk14/Map3k3/Stk3/Ptpn22/Map3k4/Itch/Hipk2/Map2k3/Fgd4/Gadd45g/Egfr/Map3k10/Gstp1/Fgf14/Ccl19/Igf1r/Sfrp1/Mfhas1/Sh3rf3/Map2k6/Xdh/Zfp36l1	25	GO_BP	down
GO:0071560	cellular response to transforming growth factor beta stimulus	25/871	248/28891	1.58146e-07	9.4079e-06	6.10074e-06	Stat3/Smad1/Nr3c1/Chst11/Crebbp/Lgals9/Ep300/Zyx/Tgfbr3/Hipk2/Bcl9l/Npnt/Wwox/Ski/Ptprk/Ldlrad4/Igf1r/Zfp36l2/Itga3/Tgfb1i1/Fbn1/Zfp36l1/Ltbp4/Zeb1/Wfikkn2	25	GO_BP	down
GO:0060562	epithelial tube morphogenesis	33/871	395/28891	1.63019e-07	9.58879e-06	6.21803e-06	Luzp1/Hif1a/Nr3c1/Ext1/Notch2/Kdm2a/Col4a1/Med1/Btrc/Prkacb/Tead1/Stk3/Npnt/Greb1l/Gli3/Ski/Cd44/Pkd1/Adm/Ar/Sfrp1/Pkd2/Hhip/Tnc/Stox1/Epha7/Robo1/Hs3st3a1/Gpc3/Fzd2/Gli2/Angpt1/Sema3e	33	GO_BP	down
GO:0050729	positive regulation of inflammatory response	20/871	167/28891	1.71392e-07	9.94246e-06	6.44738e-06	H2-D1/H2-K1/H2-T22/Cd47/Stat5b/Gsdmd/Abcc1/H2-Q4/Prkca/Grn/H2-Q7/Stat5a/Zbp1/Lgals1/H2-Q6/Ldlr/H2-Q2/Lpl/H2-M2/C3	20	GO_BP	down
GO:0043434	response to peptide hormone	33/871	396/28891	1.7283e-07	9.94246e-06	6.44738e-06	Stat3/Mbd5/Braf/Ncoa2/Tcf12/Mapk14/Ccnd3/Stat5b/Gkap1/Tgfbr3/Pik3r1/Stat2/Ptprj/Stxbp4/Sos1/Scap/Cpeb1/Prkca/Ptpra/Sik2/Stat5a/Prkcq/Igf1r/Serpina3i/Akt3/Ghr/Zfp36l1/Hdac9/Myo5a/Serpina3g/Prkd1/Lpl/Grb10	33	GO_BP	down
GO:0051090	regulation of DNA-binding transcription factor activity	35/871	436/28891	1.82018e-07	1.03572e-05	6.71633e-06	Stat3/Plpp3/Anxa4/Crebbp/Rigi/Ralgapa1/Flna/Trim12c/Kat6a/Flot2/Ep300/Trim25/Tgfbr3/Stk3/Itch/Traf5/Sav1/Trim12a/Hipk2/Sp100/Hes6/Hdac4/Pias2/Map3k10/Pkd1/Ar/Prkcq/Igf1r/Pkd2/Trim37/Trim30a/Eda/Prkd1/Cyp1b1/Fzd2	35	GO_BP	down
GO:0019058	viral life cycle	25/871	250/28891	1.84529e-07	1.03872e-05	6.73579e-06	Pcbp2/Nectin1/Nedd4/Ddx6/Top2b/N4bp1/Pikfyve/Trim12c/Prkn/Trim25/Srpk1/Ddb1/Trim12a/Adar/Shfl/Trim56/Rad50/Nbn/Gbp7/Ciita/Apoe/Lgals1/Trim30a/Pcsk5/Plscr2	25	GO_BP	down
GO:0030111	regulation of Wnt signaling pathway	29/871	323/28891	2.03358e-07	1.13253e-05	7.34413e-06	G3bp1/Rbms3/Gnaq/Plpp3/Mcc/Mbd2/Usp34/Mapk14/Btrc/Prkn/Kremen1/Stk3/Lrrk1/Tiam1/Rnf43/Wwox/Gli3/Egfr/Ctnnd2/Rnf213/Bicc1/Sfrp1/Apoe/Itga3/Invs/Eda/Gpc3/Gpc5/Grb10	29	GO_BP	down
GO:0071559	response to transforming growth factor beta	25/871	252/28891	2.14934e-07	1.1844e-05	7.68047e-06	Stat3/Smad1/Nr3c1/Chst11/Crebbp/Lgals9/Ep300/Zyx/Tgfbr3/Hipk2/Bcl9l/Npnt/Wwox/Ski/Ptprk/Ldlrad4/Igf1r/Zfp36l2/Itga3/Tgfb1i1/Fbn1/Zfp36l1/Ltbp4/Zeb1/Wfikkn2	25	GO_BP	down
GO:0018209	peptidyl-serine modification	30/871	343/28891	2.22156e-07	1.19655e-05	7.75927e-06	Braf/Dyrk1a/Rassf2/Mapk14/Pikfyve/Prkacb/Srpk1/Fnip1/Hipk2/Prkce/Atm/Atr/Egfr/Cd44/Prkca/Map3k10/Pde4d/Pdk3/Mapkapk3/Pkd1/Prkcq/Rps6ka3/Camk2b/Stox1/Akt3/Sgk3/Prkd1/Dclk1/Angpt1/Camk4	30	GO_BP	down
GO:0002475	antigen processing and presentation via MHC class Ib	11/871	50/28891	2.23996e-07	1.19655e-05	7.75927e-06	H2-D1/H2-K1/Ap3b1/H2-T22/B2m/H2-Q4/H2-M3/H2-Q7/H2-Q6/H2-Q2/H2-M2	11	GO_BP	down
GO:0002483	antigen processing and presentation of endogenous peptide antigen	11/871	50/28891	2.23996e-07	1.19655e-05	7.75927e-06	H2-D1/H2-K1/Tap1/H2-T22/B2m/H2-Q4/H2-M3/H2-Q7/H2-Q6/H2-Q2/H2-M2	11	GO_BP	down
GO:0002438	acute inflammatory response to antigenic stimulus	12/871	61/28891	2.34266e-07	1.23877e-05	8.03306e-06	H2-D1/H2-K1/Ext1/H2-T22/Serpinb9/H2-Q4/Il20rb/H2-Q7/H2-Q6/H2-Q2/H2-M2/C3	12	GO_BP	down
GO:0007044	cell-substrate junction assembly	15/871	98/28891	2.43986e-07	1.26601e-05	8.20969e-06	Iqgap1/Bcr/Ptprj/Plec/Itgb4/Tns1/Peak1/Ajuba/Ptprk/Ptpra/Efna5/Actn1/Wdpcp/Cdh11/Phldb2	15	GO_BP	down
GO:0032970	regulation of actin filament-based process	33/871	402/28891	2.44254e-07	1.26601e-05	8.20969e-06	Braf/Synpo2/Cd47/Cyrib/Flna/Tmsb10/Washc2/Ep300/Prkn/Nf2/Pik3r1/Washc4/Lpar1/Cnn2/Pdpn/Prkce/Frmd6/Flii/Pde4d/Fgf13/Shroom2/Prkcq/Ccdc88a/Efna5/Trpm2/Dsg2/Lmod1/Phldb2/Swap70/Pak3/Alox15/Pam/Prkd1	33	GO_BP	down
GO:0006935	chemotaxis	36/871	462/28891	2.52099e-07	1.29386e-05	8.39028e-06	Gbf1/Mycbp2/Bmpr2/Cyrib/Lgals9/Pikfyve/Lpar1/Tiam1/Cxcl16/Ptprj/Plec/Abcc1/Prkca/Mospd2/Gstp1/Pde4d/Ccn1/Vegfb/Ccl19/Prkcq/Mmp28/Unc5c/Mcu/Trpm2/Cyp7b1/Swap70/Robo1/Ecscr/Ptn/Prkd1/Dock4/Sema3a/Angpt1/Itga1/Robo2/Sema3e	36	GO_BP	down
GO:0016358	dendrite development	29/871	327/28891	2.63533e-07	1.33941e-05	8.68568e-06	Nedd4/Iqgap1/Nr3c1/Arid1b/Rere/Crebbp/Rapgef2/Asap1/Lpar1/Tiam1/Ywhah/Cpeb3/Pias2/Mfn1/Grn/Ctnnd2/Camk2b/Ptprz1/Apoe/Trak2/Nlgn1/Robo1/Dock10/Pak3/Grip1/Sdk1/Ptn/Dclk1/Sema3a	29	GO_BP	down
GO:0045953	negative regulation of natural killer cell mediated cytotoxicity	11/871	51/28891	2.77854e-07	1.39538e-05	9.0486e-06	H2-D1/H2-K1/Tap1/H2-T22/Lgals9/Serpinb9/H2-Q4/H2-Q7/H2-Q6/H2-Q2/H2-M2	11	GO_BP	down
GO:0042330	taxis	36/871	464/28891	2.79875e-07	1.39538e-05	9.0486e-06	Gbf1/Mycbp2/Bmpr2/Cyrib/Lgals9/Pikfyve/Lpar1/Tiam1/Cxcl16/Ptprj/Plec/Abcc1/Prkca/Mospd2/Gstp1/Pde4d/Ccn1/Vegfb/Ccl19/Prkcq/Mmp28/Unc5c/Mcu/Trpm2/Cyp7b1/Swap70/Robo1/Ecscr/Ptn/Prkd1/Dock4/Sema3a/Angpt1/Itga1/Robo2/Sema3e	36	GO_BP	down
GO:0007178	transmembrane receptor protein serine/threonine kinase signaling pathway	33/871	405/28891	2.895e-07	1.42975e-05	9.27148e-06	Stat3/Smad1/Chst11/Ext1/Notch2/Crebbp/Bmpr2/Mapk14/Lgals9/Lnpep/Crim1/Ep300/Zyx/Tgfbr3/Hipk2/Bcl9l/Trps1/Npnt/Ski/Ptprk/Ccn1/Ldlrad4/Sfrp1/Itga3/Tgfb1i1/Fbn1/Magi2/Ltbp4/Zeb1/Gpc3/Wfikkn2/Ucma/Vim	33	GO_BP	down
GO:0050769	positive regulation of neurogenesis	29/871	329/28891	2.99466e-07	1.46514e-05	9.501e-06	Hif1a/Qki/Braf/Notch2/Bmpr2/Ep300/Tiam1/Il6st/Cdh4/Pias2/Mfn1/Gli3/Arhgap32/Egfr/Ptpra/Ascl1/Tspo/Efna5/Camk2b/Ptprz1/Plxna2/Apoe/Serpinf1/Robo1/Pak3/Grip1/Ptn/Robo2/Vim	29	GO_BP	down
GO:0031348	negative regulation of defense response	29/871	330/28891	3.19089e-07	1.5467e-05	1.00299e-05	Pcbp2/H2-D1/H2-K1/Stat3/Tap1/Bcr/H2-T22/Lgals9/Ptpn22/Itch/Stat2/Adar/Cd44/Serpinb9/H2-Q4/Grn/Gstp1/Samhd1/Il20rb/H2-Q7/Dhx58/Rora/Mfhas1/Apoe/Trim30a/H2-Q6/Ldlr/H2-Q2/H2-M2	29	GO_BP	down
GO:0032760	positive regulation of tumor necrosis factor production	18/871	143/28891	3.32215e-07	1.59555e-05	1.03466e-05	H2-D1/H2-K1/Stat3/H2-T22/Rigi/Lgals9/Zbtb20/Pik3r1/Ptprj/H2-Q4/Ccn1/Ccl19/H2-Q7/Ifngr1/H2-Q6/H2-Q2/Lpl/H2-M2	18	GO_BP	down
GO:0002716	negative regulation of natural killer cell mediated immunity	11/871	52/28891	3.4285e-07	1.63165e-05	1.05808e-05	H2-D1/H2-K1/Tap1/H2-T22/Lgals9/Serpinb9/H2-Q4/H2-Q7/H2-Q6/H2-Q2/H2-M2	11	GO_BP	down
GO:0048732	gland development	37/871	489/28891	3.55546e-07	1.67683e-05	1.08737e-05	Hif1a/Nr3c1/Ext1/Braf/Notch2/Jarid2/Med1/Btrc/Trp63/Upf2/Stat5b/Tgfbr3/Hipk2/Cadm1/Fem1b/Atm/Gli3/Egfr/Cd44/Pkd1/Stat5a/Ascl1/Ar/Igf1r/Edaradd/Sfrp1/Pkd2/Tnc/Cyp7b1/Xdh/Serpinf1/Robo1/Aire/Eda/Ptn/Sema3a/Gli2	37	GO_BP	down
GO:0001787	natural killer cell proliferation	10/871	42/28891	3.61305e-07	1.6777e-05	1.08794e-05	H2-D1/H2-K1/H2-T22/Stat5b/Ptpn22/H2-Q4/H2-Q7/H2-Q6/H2-Q2/H2-M2	10	GO_BP	down
GO:0001912	positive regulation of leukocyte mediated cytotoxicity	15/871	101/28891	3.65345e-07	1.6777e-05	1.08794e-05	H2-D1/H2-K1/H2-T22/Cyrib/Ap1g1/Stat5b/Cadm1/B2m/H2-Q4/H2-M3/H2-Q7/Stat5a/H2-Q6/H2-Q2/H2-M2	15	GO_BP	down
GO:0060021	roof of mouth development	15/871	101/28891	3.65345e-07	1.6777e-05	1.08794e-05	Pds5a/Tgfbr3/Tshz1/Sos1/Gli3/Ski/Zfp950/Wdpcp/Msc/Fras1/Bnc2/Pkdcc/Wfikkn2/Fzd2/Schip1	15	GO_BP	down
GO:2000564	regulation of CD8-positive, alpha-beta T cell proliferation	9/871	33/28891	3.97278e-07	1.80848e-05	1.17274e-05	H2-D1/H2-K1/H2-T22/Ptpn22/H2-Q4/H2-Q7/H2-Q6/H2-Q2/H2-M2	9	GO_BP	down
GO:0045824	negative regulation of innate immune response	17/871	130/28891	4.04706e-07	1.82641e-05	1.18437e-05	Pcbp2/H2-D1/H2-K1/Tap1/H2-T22/Lgals9/Stat2/Adar/Serpinb9/H2-Q4/Grn/Samhd1/H2-Q7/Dhx58/H2-Q6/H2-Q2/H2-M2	17	GO_BP	down
GO:1903557	positive regulation of tumor necrosis factor superfamily cytokine production	18/871	145/28891	4.09748e-07	1.83336e-05	1.18888e-05	H2-D1/H2-K1/Stat3/H2-T22/Rigi/Lgals9/Zbtb20/Pik3r1/Ptprj/H2-Q4/Ccn1/Ccl19/H2-Q7/Ifngr1/H2-Q6/H2-Q2/Lpl/H2-M2	18	GO_BP	down
GO:0019883	antigen processing and presentation of endogenous antigen	11/871	53/28891	4.20921e-07	1.8517e-05	1.20077e-05	H2-D1/H2-K1/Tap1/H2-T22/B2m/H2-Q4/H2-M3/H2-Q7/H2-Q6/H2-Q2/H2-M2	11	GO_BP	down
GO:0030850	prostate gland development	11/871	53/28891	4.20921e-07	1.8517e-05	1.20077e-05	Trp63/Fem1b/Cd44/Stat5a/Ar/Igf1r/Sfrp1/Tnc/Cyp7b1/Serpinf1/Gli2	11	GO_BP	down
GO:0002697	regulation of immune effector process	36/871	473/28891	4.44015e-07	1.93702e-05	1.2561e-05	H2-D1/H2-K1/Tap1/Bcr/H2-T22/Rigi/Ankrd17/Cd47/Cyrib/Lgals9/Ap1g1/Rif1/Stat5b/Trp53bp1/Ptpn22/Ptprj/Cadm1/B2m/Myo18a/Serpinb9/H2-Q4/Grn/H2-M3/Il20rb/Ccl19/H2-Q7/Stat5a/Dhx58/H2-DMb2/H2-Q6/Ddx60/H2-Q2/Angpt1/H2-M2/C3/Fcer2a	36	GO_BP	down
GO:0042129	regulation of T cell proliferation	23/871	227/28891	4.48386e-07	1.93992e-05	1.25798e-05	H2-D1/H2-K1/H2-T22/Lgals9/Adk/Stat5b/Ptpn22/Itch/Il6st/Sos1/Cd44/H2-Q4/Il20rb/Ccl19/H2-Q7/Stat5a/Prkcq/Cblb/H2-DMb2/H2-Q6/Igfbp2/H2-Q2/H2-M2	23	GO_BP	down
GO:0046634	regulation of alpha-beta T cell activation	18/871	146/28891	4.54393e-07	1.94979e-05	1.26438e-05	H2-D1/H2-K1/Ap3b1/H2-T22/Lgals9/Ptpn22/Itch/Gli3/Cd44/H2-Q4/Ccl19/H2-Q7/Prkcq/Cblb/H2-Q6/H2-Q2/H2-M2/Zbtb16	18	GO_BP	down
GO:0002883	regulation of hypersensitivity	10/871	43/28891	4.5812e-07	1.9498e-05	1.26439e-05	H2-D1/H2-K1/H2-T22/H2-Q4/Il20rb/H2-Q7/H2-Q6/H2-Q2/H2-M2/C3	10	GO_BP	down
GO:0042267	natural killer cell mediated cytotoxicity	16/871	117/28891	4.77143e-07	2.01439e-05	1.30627e-05	H2-D1/H2-K1/Tap1/H2-T22/Lgals9/Ap1g1/Stat5b/Cadm1/Serpinb9/H2-Q4/H2-M3/H2-Q7/Stat5a/H2-Q6/H2-Q2/H2-M2	16	GO_BP	down
GO:0035107	appendage morphogenesis	20/871	178/28891	4.85388e-07	2.01667e-05	1.30775e-05	Gnaq/Chst11/Ext1/Notch2/Med1/Dync2h1/Trp63/Mbnl1/Gli3/Large1/Ski/Flvcr1/Wdpcp/Plxna2/Fras1/Pkdcc/Gpc3/Gli2/Zbtb16/Pcsk5	20	GO_BP	down
GO:0035108	limb morphogenesis	20/871	178/28891	4.85388e-07	2.01667e-05	1.30775e-05	Gnaq/Chst11/Ext1/Notch2/Med1/Dync2h1/Trp63/Mbnl1/Gli3/Large1/Ski/Flvcr1/Wdpcp/Plxna2/Fras1/Pkdcc/Gpc3/Gli2/Zbtb16/Pcsk5	20	GO_BP	down
GO:0001796	regulation of type IIa hypersensitivity	9/871	34/28891	5.25876e-07	2.08558e-05	1.35243e-05	H2-D1/H2-K1/H2-T22/H2-Q4/H2-Q7/H2-Q6/H2-Q2/H2-M2/C3	9	GO_BP	down
GO:0001798	positive regulation of type IIa hypersensitivity	9/871	34/28891	5.25876e-07	2.08558e-05	1.35243e-05	H2-D1/H2-K1/H2-T22/H2-Q4/H2-Q7/H2-Q6/H2-Q2/H2-M2/C3	9	GO_BP	down
GO:0002892	regulation of type II hypersensitivity	9/871	34/28891	5.25876e-07	2.08558e-05	1.35243e-05	H2-D1/H2-K1/H2-T22/H2-Q4/H2-Q7/H2-Q6/H2-Q2/H2-M2/C3	9	GO_BP	down
GO:0002894	positive regulation of type II hypersensitivity	9/871	34/28891	5.25876e-07	2.08558e-05	1.35243e-05	H2-D1/H2-K1/H2-T22/H2-Q4/H2-Q7/H2-Q6/H2-Q2/H2-M2/C3	9	GO_BP	down
GO:0035740	CD8-positive, alpha-beta T cell proliferation	9/871	34/28891	5.25876e-07	2.08558e-05	1.35243e-05	H2-D1/H2-K1/H2-T22/Ptpn22/H2-Q4/H2-Q7/H2-Q6/H2-Q2/H2-M2	9	GO_BP	down
GO:2001187	positive regulation of CD8-positive, alpha-beta T cell activation	9/871	34/28891	5.25876e-07	2.08558e-05	1.35243e-05	H2-D1/H2-K1/H2-T22/Ptpn22/H2-Q4/H2-Q7/H2-Q6/H2-Q2/H2-M2	9	GO_BP	down
GO:0002507	tolerance induction	11/871	55/28891	6.25438e-07	2.46178e-05	1.59639e-05	H2-D1/H2-K1/H2-T22/Itch/H2-Q4/H2-Q7/Cblb/Aire/H2-Q6/H2-Q2/H2-M2	11	GO_BP	down
GO:0001813	regulation of antibody-dependent cellular cytotoxicity	8/871	26/28891	6.37338e-07	2.47146e-05	1.60266e-05	H2-D1/H2-K1/H2-T22/H2-Q4/H2-Q7/H2-Q6/H2-Q2/H2-M2	8	GO_BP	down
GO:0001815	positive regulation of antibody-dependent cellular cytotoxicity	8/871	26/28891	6.37338e-07	2.47146e-05	1.60266e-05	H2-D1/H2-K1/H2-T22/H2-Q4/H2-Q7/H2-Q6/H2-Q2/H2-M2	8	GO_BP	down
GO:0090287	regulation of cellular response to growth factor stimulus	28/871	323/28891	6.68044e-07	2.55817e-05	1.65889e-05	Nedd4/Hif1a/Chst11/Notch2/Crebbp/Crim1/Ep300/Cd63/Tgfbr3/Hipk2/Bcl9l/Npnt/Ski/Ccn1/Vegfb/Ldlrad4/Sfrp1/Hhip/Itga3/Xdh/Tgfb1i1/Robo1/Fbn1/Zeb1/Gpc3/Wfikkn2/Angpt1/Grb10	28	GO_BP	down
GO:0002228	natural killer cell mediated immunity	16/871	120/28891	6.76525e-07	2.55817e-05	1.65889e-05	H2-D1/H2-K1/Tap1/H2-T22/Lgals9/Ap1g1/Stat5b/Cadm1/Serpinb9/H2-Q4/H2-M3/H2-Q7/Stat5a/H2-Q6/H2-Q2/H2-M2	16	GO_BP	down
GO:0070534	protein K63-linked ubiquitination	12/871	67/28891	6.83297e-07	2.55817e-05	1.65889e-05	Nedd4/Trim12c/Ube2e2/Prkn/Ptpn22/Itch/Traf5/Trim12a/Birc2/Trim56/Rnf213/Trim30a	12	GO_BP	down
GO:0001794	type IIa hypersensitivity	9/871	35/28891	6.8902e-07	2.55817e-05	1.65889e-05	H2-D1/H2-K1/H2-T22/H2-Q4/H2-Q7/H2-Q6/H2-Q2/H2-M2/C3	9	GO_BP	down
GO:0002445	type II hypersensitivity	9/871	35/28891	6.8902e-07	2.55817e-05	1.65889e-05	H2-D1/H2-K1/H2-T22/H2-Q4/H2-Q7/H2-Q6/H2-Q2/H2-M2/C3	9	GO_BP	down
GO:0032819	positive regulation of natural killer cell proliferation	9/871	35/28891	6.8902e-07	2.55817e-05	1.65889e-05	H2-D1/H2-K1/H2-T22/Stat5b/H2-Q4/H2-Q7/H2-Q6/H2-Q2/H2-M2	9	GO_BP	down
GO:0046822	regulation of nucleocytoplasmic transport	17/871	135/28891	6.96868e-07	2.56909e-05	1.66597e-05	Ppp1r12a/Nedd4/Thoc2/Cpsf6/Ptpn14/Mapk14/Flna/Ep300/Ptpn22/Pik3r1/Sp100/Gli3/Prkcq/Prkd1/Wipf1/Angpt1/Camk4	17	GO_BP	down
GO:0002699	positive regulation of immune effector process	28/871	326/28891	8.03671e-07	2.94211e-05	1.90787e-05	H2-D1/H2-K1/H2-T22/Rigi/Ankrd17/Cyrib/Ap1g1/Rif1/Stat5b/Trp53bp1/Ptpn22/Ptprj/Cadm1/B2m/Myo18a/H2-Q4/H2-M3/Ccl19/H2-Q7/Stat5a/Dhx58/H2-DMb2/H2-Q6/Ddx60/H2-Q2/H2-M2/C3/Fcer2a	28	GO_BP	down
GO:2000377	regulation of reactive oxygen species metabolic process	19/871	168/28891	8.43375e-07	3.06602e-05	1.98822e-05	Hif1a/Stat3/Bcr/Mapk14/Pikfyve/Prkn/Aatf/Birc2/Bnip3/Hdac4/Fbln5/Abcb7/Egfr/Gstp1/Pdk3/Tspo/Xdh/Trim30a/Cyp1b1	19	GO_BP	down
GO:0002519	natural killer cell tolerance induction	8/871	27/28891	8.81777e-07	3.11899e-05	2.02257e-05	H2-D1/H2-K1/H2-T22/H2-Q4/H2-Q7/H2-Q6/H2-Q2/H2-M2	8	GO_BP	down
GO:0032639	TRAIL production	8/871	27/28891	8.81777e-07	3.11899e-05	2.02257e-05	H2-D1/H2-K1/H2-T22/H2-Q4/H2-Q7/H2-Q6/H2-Q2/H2-M2	8	GO_BP	down
GO:0032679	regulation of TRAIL production	8/871	27/28891	8.81777e-07	3.11899e-05	2.02257e-05	H2-D1/H2-K1/H2-T22/H2-Q4/H2-Q7/H2-Q6/H2-Q2/H2-M2	8	GO_BP	down
GO:0032759	positive regulation of TRAIL production	8/871	27/28891	8.81777e-07	3.11899e-05	2.02257e-05	H2-D1/H2-K1/H2-T22/H2-Q4/H2-Q7/H2-Q6/H2-Q2/H2-M2	8	GO_BP	down
GO:0002428	antigen processing and presentation of peptide antigen via MHC class Ib	10/871	46/28891	8.97474e-07	3.14418e-05	2.03891e-05	H2-D1/H2-K1/H2-T22/B2m/H2-Q4/H2-M3/H2-Q7/H2-Q6/H2-Q2/H2-M2	10	GO_BP	down
GO:0050678	regulation of epithelial cell proliferation	33/871	426/28891	9.01891e-07	3.14418e-05	2.03891e-05	Stat3/Mcc/Notch2/Med1/Trp63/Tgfbr3/Stk3/Krit1/Sav1/Stxbp4/B2m/Egfr/Ptprk/Prkca/Grn/Vegfb/Stat5a/Ar/Ang/Sfrp1/Apoe/Cyp7b1/Xdh/Serpinf1/Akt3/Robo1/Zfp36l1/Fut1/Zeb1/Ptn/Prkd1/Gpc3/Gli2	33	GO_BP	down
GO:0030522	intracellular receptor signaling pathway	28/871	328/28891	9.07759e-07	3.14418e-05	2.03891e-05	Ncor1/Stmp1/Nedd4/Stat3/Nr3c1/Ddx17/Ncoa2/Rigi/Ankrd17/Med1/Ncor2/Trp63/Ep300/Trim25/Ptpn22/Ywhah/Irf7/Pias2/Pdk3/Ar/Dhx58/Rora/Sfrp1/Cyp7b1/Trim30a/Alox15/Ddx60/Prkd1	28	GO_BP	down
GO:0001911	negative regulation of leukocyte mediated cytotoxicity	11/871	57/28891	9.12924e-07	3.14418e-05	2.03891e-05	H2-D1/H2-K1/Tap1/H2-T22/Lgals9/Serpinb9/H2-Q4/H2-Q7/H2-Q6/H2-Q2/H2-M2	11	GO_BP	down
GO:0050770	regulation of axonogenesis	20/871	186/28891	9.80166e-07	3.35371e-05	2.17478e-05	Ttc3/Braf/Bmpr2/Ep300/Tiam1/Cdh4/Arhgap32/Fgf13/Efna5/Plxna2/Apoe/Trak2/Epha7/Robo1/Pak3/Sema3a/Lrrc4c/Robo2/Sema3e/Vim	20	GO_BP	down
GO:0007264	small GTPase mediated signal transduction	33/871	428/28891	1.00031e-06	3.39307e-05	2.2003e-05	Auts2/Arhgef12/Notch2/Bnip2/Bcr/Ralgapa1/Arhgef11/Cyrib/Rapgef2/Ralgapb/Ralgapa2/Rit1/Lpar1/Tiam1/Dennd1a/Pdpn/Sos1/Arhgap32/Abca1/Arl6/Dock9/Ccdc88a/Psd3/Ophn1/Apoe/Plce1/Itga3/Robo1/Dock10/Rab30/Rgl1/Dock4/Adra1a	33	GO_BP	down
GO:0002708	positive regulation of lymphocyte mediated immunity	19/871	170/28891	1.01112e-06	3.39307e-05	2.2003e-05	H2-D1/H2-K1/H2-T22/Cyrib/Ap1g1/Rif1/Stat5b/Trp53bp1/Cadm1/B2m/H2-Q4/H2-M3/H2-Q7/Stat5a/H2-Q6/H2-Q2/H2-M2/C3/Fcer2a	19	GO_BP	down
GO:0030010	establishment of cell polarity	19/871	170/28891	1.01112e-06	3.39307e-05	2.2003e-05	Exoc4/Pard3b/Gbf1/Map4/Cyrib/Cdk5rap2/Flot2/Krit1/Frmd4b/Myo18a/Fgf13/Ccl19/Pkd1/Igf1r/Wdpcp/Sdccag8/Ophn1/Amotl2/Phldb2	19	GO_BP	down
GO:0062012	regulation of small molecule metabolic process	31/871	389/28891	1.05808e-06	3.52805e-05	2.28783e-05	Ncor1/Hif1a/Stat3/Nr3c1/Ncoa2/Supt20/Ppp4r3a/Dcaf5/Ncor2/Zbtb20/Ep300/Prkn/Ddb1/Abcg1/Isyna1/Fmo1/Prkce/Hdac4/Scap/Bcl2l1/Pdk3/Prkag2/Sik2/Kcnma1/Clybl/Tspo/Rora/Apoe/Slc7a7/Ldlr/Cbfa2t3	31	GO_BP	down
GO:0002832	negative regulation of response to biotic stimulus	20/871	187/28891	1.06699e-06	3.53526e-05	2.29251e-05	Pcbp2/H2-D1/H2-K1/Tap1/H2-T22/Lgals9/Ptpn22/Itch/Stat2/Adar/Serpinb9/H2-Q4/Grn/Samhd1/H2-Q7/Dhx58/Trim30a/H2-Q6/H2-Q2/H2-M2	20	GO_BP	down
GO:0050905	neuromuscular process	21/871	204/28891	1.08446e-06	3.54739e-05	2.30038e-05	Atxn2/Herc1/Vti1a/Bcr/Mycbp2/Tmem150c/Prkn/Gaa/Hipk2/Large1/Nbn/Fgf14/Kcnma1/Ascl1/Camk2b/Rbfox1/Pmp22/Myo5a/Pcdh15/Prkd1/Npas3	21	GO_BP	down
GO:0002474	antigen processing and presentation of peptide antigen via MHC class I	11/871	58/28891	1.09609e-06	3.54739e-05	2.30038e-05	H2-D1/H2-K1/Tap1/H2-T22/B2m/H2-Q4/H2-M3/H2-Q7/H2-Q6/H2-Q2/H2-M2	11	GO_BP	down
GO:0036037	CD8-positive, alpha-beta T cell activation	11/871	58/28891	1.09609e-06	3.54739e-05	2.30038e-05	H2-D1/H2-K1/H2-T22/Tox/Ptpn22/H2-Q4/H2-Q7/Psmb11/H2-Q6/H2-Q2/H2-M2	11	GO_BP	down
GO:0010563	negative regulation of phosphorus metabolic process	33/871	430/28891	1.1086e-06	3.54739e-05	2.30038e-05	Gnaq/Plpp3/Iqgap1/Rassf2/Impact/Sh3bp5/Cdk5rap2/Mvp/Prkn/Nf2/Ptpn22/Lrrk1/Ptprj/Plec/Adar/Cadm1/Gadd45g/Ajuba/Prkca/Gstp1/Pde4d/Prkag2/Mgat5/Tspo/Cblb/Sfrp1/Mfhas1/Apoe/Xdh/Swap70/Angpt1/Slc8a1/Grb10	33	GO_BP	down
GO:0045936	negative regulation of phosphate metabolic process	33/871	430/28891	1.1086e-06	3.54739e-05	2.30038e-05	Gnaq/Plpp3/Iqgap1/Rassf2/Impact/Sh3bp5/Cdk5rap2/Mvp/Prkn/Nf2/Ptpn22/Lrrk1/Ptprj/Plec/Adar/Cadm1/Gadd45g/Ajuba/Prkca/Gstp1/Pde4d/Prkag2/Mgat5/Tspo/Cblb/Sfrp1/Mfhas1/Apoe/Xdh/Swap70/Angpt1/Slc8a1/Grb10	33	GO_BP	down
GO:0007015	actin filament organization	35/871	471/28891	1.11131e-06	3.54739e-05	2.30038e-05	Mical3/Iqgap1/Braf/Synpo2/Cd47/Cyrib/Flna/Tmsb10/Washc2/Zyx/Prkn/Nf2/Samd14/Pik3r1/Washc4/Lpar1/Cnn2/Plec/Prkce/Cald1/Flii/Diaph2/Myo1e/Shroom2/Prkcq/Ccdc88a/Actn1/Lmod1/Phldb2/Swap70/Pak3/Alox15/Myo5a/Pcdh15/Dpysl3	35	GO_BP	down
GO:0030336	negative regulation of cell migration	27/871	313/28891	1.15745e-06	3.65016e-05	2.36702e-05	Stat3/Svbp/Mcc/Braf/Bcr/Cd63/Tgfbr3/Srgap3/Krit1/Cnn2/Ptprj/Sp100/Ptprk/Gstp1/Ldlrad4/Mmp28/Sfrp1/Apoe/Cdh11/Serpinf1/Phldb2/Robo1/Magi2/Ptn/Cyp1b1/Dpysl3/Sema3a	27	GO_BP	down
GO:0070663	regulation of leukocyte proliferation	27/871	313/28891	1.15745e-06	3.65016e-05	2.36702e-05	H2-D1/H2-K1/H2-T22/Lgals9/Adk/Stat5b/Ptpn22/Itch/Cnn2/Il6st/Sos1/Bcl2l1/Atm/Cd44/H2-Q4/Gstp1/Il20rb/Ccl19/H2-Q7/Stat5a/Prkcq/Cblb/H2-DMb2/H2-Q6/Igfbp2/H2-Q2/H2-M2	27	GO_BP	down
GO:0042102	positive regulation of T cell proliferation	17/871	140/28891	1.16865e-06	3.66342e-05	2.37561e-05	H2-D1/H2-K1/H2-T22/Adk/Stat5b/Ptpn22/Il6st/H2-Q4/Ccl19/H2-Q7/Stat5a/Prkcq/H2-DMb2/H2-Q6/Igfbp2/H2-Q2/H2-M2	17	GO_BP	down
GO:0031400	negative regulation of protein modification process	35/871	473/28891	1.22425e-06	3.81484e-05	2.47381e-05	Gnaq/Plpp3/Svbp/Rassf2/Impact/Sh3bp5/N4bp1/Oga/Cdk5rap2/Mvp/Prkn/Nf2/Ptpn22/Lrrk1/Ptprj/Plec/Adar/Cadm1/Prkce/Spopl/Gadd45g/Prkca/Gstp1/Pde4d/Prkag2/Mgat5/Tspo/Cblb/Sfrp1/Mfhas1/Apoe/Xdh/Swap70/Angpt1/Slc8a1	35	GO_BP	down
GO:0002706	regulation of lymphocyte mediated immunity	23/871	241/28891	1.27966e-06	3.96393e-05	2.57048e-05	H2-D1/H2-K1/Tap1/H2-T22/Cyrib/Lgals9/Ap1g1/Rif1/Stat5b/Trp53bp1/Cadm1/B2m/Serpinb9/H2-Q4/H2-M3/Il20rb/H2-Q7/Stat5a/H2-Q6/H2-Q2/H2-M2/C3/Fcer2a	23	GO_BP	down
GO:0040013	negative regulation of locomotion	29/871	358/28891	1.68779e-06	5.1974e-05	3.37036e-05	Stat3/Svbp/Mcc/Braf/Bcr/Cd63/Tgfbr3/Srgap3/Krit1/Cnn2/Ptprj/Sp100/Ptprk/Gstp1/Ldlrad4/Mmp28/Sfrp1/Apoe/Cdh11/Serpinf1/Phldb2/Robo1/Magi2/Ptn/Cyp1b1/Dpysl3/Sema3a/Robo2/Sema3e	29	GO_BP	down
GO:0060998	regulation of dendritic spine development	13/871	86/28891	1.77517e-06	5.43451e-05	3.52411e-05	Nr3c1/Crebbp/Asap1/Lpar1/Tiam1/Cpeb3/Mfn1/Grn/Camk2b/Apoe/Nlgn1/Pak3/Sdk1	13	GO_BP	down
GO:0002885	positive regulation of hypersensitivity	9/871	39/28891	1.85605e-06	5.64909e-05	3.66326e-05	H2-D1/H2-K1/H2-T22/H2-Q4/H2-Q7/H2-Q6/H2-Q2/H2-M2/C3	9	GO_BP	down
GO:0061138	morphogenesis of a branching epithelium	22/871	229/28891	1.93913e-06	5.86782e-05	3.8051e-05	Ext1/Col4a1/Med1/Btrc/Trp63/Fem1b/Npnt/Greb1l/Gli3/Cd44/Pkd1/Adm/Ar/Sfrp1/Hhip/Tnc/Hs3st3a1/Gpc3/Sema3a/Gli2/Angpt1/Sema3e	22	GO_BP	down
GO:0018108	peptidyl-tyrosine phosphorylation	27/871	322/28891	1.9913e-06	5.99106e-05	3.88502e-05	Plpp3/Iqgap1/Dyrk1a/Sh3bp5/Zzef1/Mvp/Nf2/Ptpn22/Lrrk1/Ptprj/Il6st/Prkce/Egfr/Cd44/Prkca/Vegfb/Stat5a/Igf1r/Efna5/Ptprz1/Cblb/Sfrp1/Epha7/Ghr/Pkdcc/Angpt1/Adra1a	27	GO_BP	down
GO:0002864	regulation of acute inflammatory response to antigenic stimulus	10/871	50/28891	2.02807e-06	6.06683e-05	3.93416e-05	H2-D1/H2-K1/H2-T22/H2-Q4/Il20rb/H2-Q7/H2-Q6/H2-Q2/H2-M2/C3	10	GO_BP	down
GO:0001503	ossification	35/871	484/28891	2.06013e-06	6.12771e-05	3.97363e-05	Hif1a/Smad1/Ext1/Rassf2/Bmpr2/Mapk14/Crim1/Trp63/Kremen1/Tgfbr3/Il6st/Adar/Hdac4/Npnt/Wwox/Gli3/Ski/Ccn1/Xylt1/Srgn/Sfrp1/Map2k6/Pkdcc/Alox15/Slc24a3/Clec11a/Csgalnact1/Ptn/Prkd1/Gpc3/Gli2/Lrrc17/Zbtb16/Slc8a1/Ucma	35	GO_BP	down
GO:0001916	positive regulation of T cell mediated cytotoxicity	11/871	62/28891	2.19255e-06	6.44831e-05	4.18153e-05	H2-D1/H2-K1/H2-T22/Cyrib/B2m/H2-Q4/H2-M3/H2-Q7/H2-Q6/H2-Q2/H2-M2	11	GO_BP	down
GO:0031342	negative regulation of cell killing	11/871	62/28891	2.19255e-06	6.44831e-05	4.18153e-05	H2-D1/H2-K1/Tap1/H2-T22/Lgals9/Serpinb9/H2-Q4/H2-Q7/H2-Q6/H2-Q2/H2-M2	11	GO_BP	down
GO:0018212	peptidyl-tyrosine modification	27/871	324/28891	2.23939e-06	6.51326e-05	4.22365e-05	Plpp3/Iqgap1/Dyrk1a/Sh3bp5/Zzef1/Mvp/Nf2/Ptpn22/Lrrk1/Ptprj/Il6st/Prkce/Egfr/Cd44/Prkca/Vegfb/Stat5a/Igf1r/Efna5/Ptprz1/Cblb/Sfrp1/Epha7/Ghr/Pkdcc/Angpt1/Adra1a	27	GO_BP	down
GO:0043542	endothelial cell migration	22/871	231/28891	2.23952e-06	6.51326e-05	4.22365e-05	Hif1a/Plpp3/Rin2/Svbp/Lgals8/Map3k3/Krit1/Sp100/Map2k3/Prkca/Grn/Stat5a/S100a2/Apoe/Serpinf1/Akt3/Robo1/Fut1/Hdac9/Prkd1/Cyp1b1/Angpt1	22	GO_BP	down
GO:0030100	regulation of endocytosis	28/871	344/28891	2.31174e-06	6.68616e-05	4.33577e-05	Nedd4/Ank3/Atxn2/Bcr/Cd47/Cd63/Prkn/Lpar1/Tbc1d5/Cnn2/Ptprj/B2m/Bcl2l1/Myo18a/Il15ra/Prkca/Ccl19/Pros1/Arhgap21/Ophn1/Apoe/Nlgn1/Alox15/Magi2/Gpc3/Angpt1/Plscr2/C3	28	GO_BP	down
GO:0002705	positive regulation of leukocyte mediated immunity	20/871	197/28891	2.41054e-06	6.9336e-05	4.49623e-05	H2-D1/H2-K1/H2-T22/Rigi/Cyrib/Ap1g1/Rif1/Stat5b/Trp53bp1/Cadm1/B2m/H2-Q4/H2-M3/H2-Q7/Stat5a/H2-Q6/H2-Q2/H2-M2/C3/Fcer2a	20	GO_BP	down
GO:2000146	negative regulation of cell motility	27/871	326/28891	2.51559e-06	7.19623e-05	4.66654e-05	Stat3/Svbp/Mcc/Braf/Bcr/Cd63/Tgfbr3/Srgap3/Krit1/Cnn2/Ptprj/Sp100/Ptprk/Gstp1/Ldlrad4/Mmp28/Sfrp1/Apoe/Cdh11/Serpinf1/Phldb2/Robo1/Magi2/Ptn/Cyp1b1/Dpysl3/Sema3a	27	GO_BP	down
GO:0046635	positive regulation of alpha-beta T cell activation	14/871	103/28891	2.6454e-06	7.52645e-05	4.88067e-05	H2-D1/H2-K1/Ap3b1/H2-T22/Ptpn22/Gli3/H2-Q4/Ccl19/H2-Q7/Prkcq/H2-Q6/H2-Q2/H2-M2/Zbtb16	14	GO_BP	down
GO:0042098	T cell proliferation	24/871	270/28891	2.66886e-06	7.55214e-05	4.89733e-05	H2-D1/H2-K1/H2-T22/Lgals9/Ccnd3/Adk/Stat5b/Ptpn22/Itch/Il6st/Sos1/Cd44/H2-Q4/Il20rb/Ccl19/H2-Q7/Stat5a/Prkcq/Cblb/H2-DMb2/H2-Q6/Igfbp2/H2-Q2/H2-M2	24	GO_BP	down
GO:0046824	positive regulation of nucleocytoplasmic transport	12/871	76/28891	2.75766e-06	7.76148e-05	5.03308e-05	Nedd4/Cpsf6/Mapk14/Flna/Ep300/Ptpn22/Pik3r1/Gli3/Prkcq/Prkd1/Wipf1/Camk4	12	GO_BP	down
GO:0001788	antibody-dependent cellular cytotoxicity	8/871	31/28891	2.81548e-06	7.88183e-05	5.11113e-05	H2-D1/H2-K1/H2-T22/H2-Q4/H2-Q7/H2-Q6/H2-Q2/H2-M2	8	GO_BP	down
GO:0032944	regulation of mononuclear cell proliferation	25/871	290/28891	2.88729e-06	8.03988e-05	5.21362e-05	H2-D1/H2-K1/H2-T22/Lgals9/Adk/Stat5b/Ptpn22/Itch/Il6st/Sos1/Bcl2l1/Atm/Cd44/H2-Q4/Il20rb/Ccl19/H2-Q7/Stat5a/Prkcq/Cblb/H2-DMb2/H2-Q6/Igfbp2/H2-Q2/H2-M2	25	GO_BP	down
GO:0002866	positive regulation of acute inflammatory response to antigenic stimulus	9/871	41/28891	2.90714e-06	8.05233e-05	5.22169e-05	H2-D1/H2-K1/H2-T22/H2-Q4/H2-Q7/H2-Q6/H2-Q2/H2-M2/C3	9	GO_BP	down
GO:0043122	regulation of canonical NF-kappaB signal transduction	21/871	217/28891	2.9357e-06	8.08862e-05	5.24522e-05	Otud7b/Tank/Ankrd17/Brd4/Btrc/Trim12c/Cpne1/Prkn/Trim25/Traf5/Trim12a/Prkce/Ajuba/Gstp1/Gbp7/Ccl19/Rora/Trim30a/Eda/Prkd1/Angpt1	21	GO_BP	down
GO:0032753	positive regulation of interleukin-4 production	10/871	52/28891	2.95784e-06	8.10695e-05	5.25711e-05	H2-D1/H2-K1/H2-T22/H2-Q4/Il20rb/H2-Q7/Prkcq/H2-Q6/H2-Q2/H2-M2	10	GO_BP	down
GO:0060996	dendritic spine development	16/871	134/28891	2.99445e-06	8.16454e-05	5.29446e-05	Nr3c1/Arid1b/Crebbp/Asap1/Lpar1/Tiam1/Cpeb3/Mfn1/Grn/Ctnnd2/Camk2b/Apoe/Nlgn1/Dock10/Pak3/Sdk1	16	GO_BP	down
GO:0010001	glial cell differentiation	25/871	292/28891	3.26375e-06	8.80708e-05	5.71112e-05	Stat3/Plpp3/Qki/Nr3c1/Exoc4/Notch2/Ptprj/Plec/Itgb4/Il6st/Sos1/Abcc1/Gli3/Large1/Egfr/Ski/Ptpra/Grn/Ifngr1/Ascl1/Ptprz1/Pmp22/Ldlr/Ptn/Vim	25	GO_BP	down
GO:0060560	developmental growth involved in morphogenesis	25/871	292/28891	3.26375e-06	8.80708e-05	5.71112e-05	Ttc3/Auts2/Iqgap1/Ext1/Impact/Bmpr2/Med1/Cpne1/Ep300/Prkn/Tiam1/Cadm1/Cdh4/Arhgap32/Fgf13/Efna5/Sfrp1/Tnc/Apoe/Epha7/Robo1/Dclk1/Sema3a/Syt1/Sema3e	25	GO_BP	down
GO:0048525	negative regulation of viral process	14/871	105/28891	3.33647e-06	8.95715e-05	5.80843e-05	Crebbp/N4bp1/Trim12c/Trim25/Srpk1/Trim12a/Sp100/Shfl/Trim56/Rad50/Nbn/Ciita/Trim30a/Plscr2	14	GO_BP	down
GO:0046641	positive regulation of alpha-beta T cell proliferation	10/871	53/28891	3.54782e-06	9.47593e-05	6.14485e-05	H2-D1/H2-K1/H2-T22/Ptpn22/H2-Q4/H2-Q7/Prkcq/H2-Q6/H2-Q2/H2-M2	10	GO_BP	down
GO:0002729	positive regulation of natural killer cell cytokine production	8/871	32/28891	3.65502e-06	9.7127e-05	6.29839e-05	H2-D1/H2-K1/H2-T22/H2-Q4/H2-Q7/H2-Q6/H2-Q2/H2-M2	8	GO_BP	down
GO:0060541	respiratory system development	24/871	276/28891	3.90628e-06	0.00010328	6.69737e-05	Ap3b1/Man1a2/Ext1/Bmpr2/Ncor2/Ep300/Sav1/Cic/Hipk2/Pdpn/Gli3/Ski/Ascl1/Edaradd/Wdpcp/Hhip/Msc/Tnc/Itga3/Pkdcc/Eda/Gpc3/Gli2/Zfpm2	24	GO_BP	down
GO:0060999	positive regulation of dendritic spine development	11/871	66/28891	4.15228e-06	0.000109232	7.08337e-05	Nr3c1/Crebbp/Lpar1/Tiam1/Cpeb3/Mfn1/Grn/Camk2b/Apoe/Nlgn1/Pak3	11	GO_BP	down
GO:0050792	regulation of viral process	19/871	187/28891	4.2265e-06	0.000110358	7.1564e-05	Top2b/Crebbp/N4bp1/Trim12c/Trim25/Srpk1/Ddb1/Trim12a/Adar/Sp100/Shfl/Trim56/Rad50/Nbn/Gbp7/Ciita/Lgals1/Trim30a/Plscr2	19	GO_BP	down
GO:0098586	cellular response to virus	10/871	54/28891	4.23726e-06	0.000110358	7.1564e-05	Hif1a/Ext1/Gbf1/Crebbp/Mapk14/Lgals9/Lgals8/Adar/Ccl19/Gli2	10	GO_BP	down
GO:0002486	antigen processing and presentation of endogenous peptide antigen via MHC class I via ER pathway, TAP-independent	9/871	43/28891	4.43352e-06	0.000114492	7.42443e-05	H2-D1/H2-K1/H2-T22/H2-Q4/H2-M3/H2-Q7/H2-Q6/H2-Q2/H2-M2	9	GO_BP	down
GO:0007179	transforming growth factor beta receptor signaling pathway	20/871	205/28891	4.43969e-06	0.000114492	7.42443e-05	Stat3/Smad1/Chst11/Crebbp/Lgals9/Ep300/Zyx/Tgfbr3/Hipk2/Bcl9l/Npnt/Ski/Ptprk/Ldlrad4/Itga3/Tgfb1i1/Fbn1/Ltbp4/Zeb1/Wfikkn2	20	GO_BP	down
GO:0002370	natural killer cell cytokine production	8/871	33/28891	4.69749e-06	0.00011936	7.74014e-05	H2-D1/H2-K1/H2-T22/H2-Q4/H2-Q7/H2-Q6/H2-Q2/H2-M2	8	GO_BP	down
GO:0002727	regulation of natural killer cell cytokine production	8/871	33/28891	4.69749e-06	0.00011936	7.74014e-05	H2-D1/H2-K1/H2-T22/H2-Q4/H2-Q7/H2-Q6/H2-Q2/H2-M2	8	GO_BP	down
GO:0046597	negative regulation of viral entry into host cell	8/871	33/28891	4.69749e-06	0.00011936	7.74014e-05	Trim12c/Trim25/Trim12a/Trim56/Rad50/Nbn/Ciita/Trim30a	8	GO_BP	down
GO:0001764	neuron migration	20/871	206/28891	4.78037e-06	0.00011936	7.74014e-05	Auts2/Stat3/Top2b/Rapgef2/Flna/Arhgap32/Large1/Fgf13/Ascl1/Nav1/Camk2b/Ptprz1/Unc5c/Sdccag8/Itga3/Astn2/Mdga2/Dclk1/Sema3a/Sema3e	20	GO_BP	down
GO:0032872	regulation of stress-activated MAPK cascade	20/871	206/28891	4.78037e-06	0.00011936	7.74014e-05	Ncor1/Mid1/Rassf2/Map3k3/Stk3/Ptpn22/Map3k4/Itch/Hipk2/Fgd4/Gadd45g/Egfr/Map3k10/Gstp1/Ccl19/Igf1r/Sfrp1/Mfhas1/Sh3rf3/Xdh	20	GO_BP	down
GO:0002714	positive regulation of B cell mediated immunity	12/871	80/28891	4.79671e-06	0.00011936	7.74014e-05	H2-D1/H2-K1/H2-T22/Rif1/Trp53bp1/H2-Q4/H2-Q7/H2-Q6/H2-Q2/H2-M2/C3/Fcer2a	12	GO_BP	down
GO:0002891	positive regulation of immunoglobulin mediated immune response	12/871	80/28891	4.79671e-06	0.00011936	7.74014e-05	H2-D1/H2-K1/H2-T22/Rif1/Trp53bp1/H2-Q4/H2-Q7/H2-Q6/H2-Q2/H2-M2/C3/Fcer2a	12	GO_BP	down
GO:0050900	leukocyte migration	30/871	398/28891	4.82832e-06	0.00011936	7.74014e-05	Ext1/Bcr/Gbf1/Cd47/Lgals9/Pikfyve/Stat5b/Ptpn22/Pik3r1/Cxcl16/Cnn2/Ptprj/Plec/Cadm1/Itga6/Prkca/Mospd2/Pde4d/Vegfb/Ccl19/Mmp28/Mcu/Cd99l2/Trpm2/Itga3/Cyp7b1/Swap70/Aire/Ptn/Itga1	30	GO_BP	down
GO:0032633	interleukin-4 production	11/871	67/28891	4.83369e-06	0.00011936	7.74014e-05	H2-D1/H2-K1/Notch2/H2-T22/H2-Q4/Il20rb/H2-Q7/Prkcq/H2-Q6/H2-Q2/H2-M2	11	GO_BP	down
GO:0090092	regulation of transmembrane receptor protein serine/threonine kinase signaling pathway	23/871	261/28891	4.94917e-06	0.000121638	7.88786e-05	Chst11/Notch2/Crebbp/Bmpr2/Lgals9/Crim1/Ep300/Tgfbr3/Hipk2/Bcl9l/Npnt/Ski/Ccn1/Ldlrad4/Sfrp1/Itga3/Tgfb1i1/Fbn1/Magi2/Zeb1/Gpc3/Wfikkn2/Ucma	23	GO_BP	down
GO:0061351	neural precursor cell proliferation	21/871	225/28891	5.19626e-06	0.000127114	8.24296e-05	Hook3/Hif1a/Notch2/Kifap3/Rere/Tox/Flna/Ncor2/Zzef1/Nf2/Gli3/Grn/Nbn/Fgf13/Ascl1/Rora/Ptprz1/Hhip/Smarca1/Ptn/Gli2	21	GO_BP	down
GO:1903900	regulation of viral life cycle	17/871	156/28891	5.23034e-06	0.000127353	8.25844e-05	Top2b/N4bp1/Trim12c/Trim25/Srpk1/Ddb1/Trim12a/Adar/Shfl/Trim56/Rad50/Nbn/Gbp7/Ciita/Lgals1/Trim30a/Plscr2	17	GO_BP	down
GO:0002484	antigen processing and presentation of endogenous peptide antigen via MHC class I via ER pathway	9/871	44/28891	5.42523e-06	0.000131486	8.52649e-05	H2-D1/H2-K1/H2-T22/H2-Q4/H2-M3/H2-Q7/H2-Q6/H2-Q2/H2-M2	9	GO_BP	down
GO:0043588	skin development	27/871	340/28891	5.51018e-06	0.00013293	8.6201e-05	Ncor1/Ap3b1/Ext1/Bcr/Med1/Ncor2/Trp63/Mysm1/Sav1/Plec/Itgb4/Macroh2a2/Trps1/Sos1/Mfsd12/Itga6/Egfr/Krt7/Kazn/Edaradd/Pou2f3/Fras1/Itga3/Zfp36l1/Myo5a/Eda/Gli2	27	GO_BP	down
GO:0001655	urogenital system development	11/871	68/28891	5.61074e-06	0.000134735	8.73716e-05	Trp63/Fem1b/Cd44/Stat5a/Ar/Igf1r/Sfrp1/Tnc/Cyp7b1/Serpinf1/Gli2	11	GO_BP	down
GO:0038066	p38MAPK cascade	10/871	56/28891	5.97089e-06	0.000142729	9.25553e-05	Mapk14/Map3k3/Ptpn22/Map3k4/Map2k3/Gadd45g/Mfhas1/Map2k6/Xdh/Zfp36l1	10	GO_BP	down
GO:0048813	dendrite morphogenesis	19/871	192/28891	6.21826e-06	0.000147878	9.58945e-05	Nedd4/Rere/Rapgef2/Tiam1/Ywhah/Pias2/Mfn1/Ctnnd2/Camk2b/Ptprz1/Trak2/Nlgn1/Robo1/Dock10/Pak3/Grip1/Ptn/Dclk1/Sema3a	19	GO_BP	down
GO:0001913	T cell mediated cytotoxicity	12/871	82/28891	6.2428e-06	0.000147878	9.58945e-05	H2-D1/H2-K1/H2-T22/Cyrib/B2m/Serpinb9/H2-Q4/H2-M3/H2-Q7/H2-Q6/H2-Q2/H2-M2	12	GO_BP	down
GO:0070302	regulation of stress-activated protein kinase signaling cascade	20/871	210/28891	6.39252e-06	0.000150742	9.77519e-05	Ncor1/Mid1/Rassf2/Map3k3/Stk3/Ptpn22/Map3k4/Itch/Hipk2/Fgd4/Gadd45g/Egfr/Map3k10/Gstp1/Ccl19/Igf1r/Sfrp1/Mfhas1/Sh3rf3/Xdh	20	GO_BP	down
GO:1902074	response to salt	27/871	343/28891	6.47564e-06	0.000151782	9.8426e-05	Gnaq/Cpne3/Iqgap1/Braf/Crebbp/Cpne1/Ep300/Prkn/Plec/Prkce/B2m/Mt1/Large1/Egfr/Kcnma1/Tspo/Igf1r/Trpm2/Pkd2/Nlgn1/Alox15/Sdk1/Pcdh15/Ly6h/Lypd1/Syt1/Slc8a1	27	GO_BP	down
GO:0001914	regulation of T cell mediated cytotoxicity	11/871	69/28891	6.49459e-06	0.000151782	9.8426e-05	H2-D1/H2-K1/H2-T22/Cyrib/B2m/H2-Q4/H2-M3/H2-Q7/H2-Q6/H2-Q2/H2-M2	11	GO_BP	down
GO:0003012	muscle system process	32/871	446/28891	6.56246e-06	0.000152232	9.87179e-05	Smad1/Nr3c1/Jarid2/Oga/Flna/Adk/Ep300/Tead1/Tiam1/Gaa/Hdac4/Map2k3/Cald1/Npnt/Large1/Prkca/Pde4d/Fgf13/Vegfb/Kcnma1/Ar/Dsg2/Calcrl/Map2k6/Lmod1/Prkd1/Myh11/Irag1/Dock4/Myl1/Adra1a/Slc8a1	32	GO_BP	down
GO:0002476	antigen processing and presentation of endogenous peptide antigen via MHC class Ib	9/871	45/28891	6.60109e-06	0.000152232	9.87179e-05	H2-D1/H2-K1/H2-T22/H2-Q4/H2-M3/H2-Q7/H2-Q6/H2-Q2/H2-M2	9	GO_BP	down
GO:2001185	regulation of CD8-positive, alpha-beta T cell activation	9/871	45/28891	6.60109e-06	0.000152232	9.87179e-05	H2-D1/H2-K1/H2-T22/Ptpn22/H2-Q4/H2-Q7/H2-Q6/H2-Q2/H2-M2	9	GO_BP	down
GO:0050730	regulation of peptidyl-tyrosine phosphorylation	23/871	266/28891	6.77638e-06	0.000155589	0.000100895	Plpp3/Iqgap1/Sh3bp5/Zzef1/Mvp/Nf2/Ptpn22/Lrrk1/Ptprj/Il6st/Prkce/Egfr/Cd44/Prkca/Vegfb/Efna5/Ptprz1/Cblb/Sfrp1/Epha7/Ghr/Angpt1/Adra1a	23	GO_BP	down
GO:0002888	positive regulation of myeloid leukocyte mediated immunity	10/871	57/28891	7.04706e-06	0.000161098	0.000104467	H2-D1/H2-K1/H2-T22/Rigi/H2-Q4/H2-Q7/H2-Q6/H2-Q2/H2-M2/C3	10	GO_BP	down
GO:0001906	cell killing	24/871	286/28891	7.17327e-06	0.000162563	0.000105417	H2-D1/H2-K1/Tap1/H2-T22/Cyrib/Lgals9/Oga/Ap1g1/Stat5b/Cadm1/B2m/Bcl2l1/Serpinb9/H2-Q4/H2-M3/Gbp7/Ccl19/H2-Q7/Stat5a/H2-Q6/H2-Q2/H2-M2/C3/Fcer2a	24	GO_BP	down
GO:0050670	regulation of lymphocyte proliferation	24/871	286/28891	7.17327e-06	0.000162563	0.000105417	H2-D1/H2-K1/H2-T22/Lgals9/Adk/Stat5b/Ptpn22/Itch/Il6st/Sos1/Atm/Cd44/H2-Q4/Il20rb/Ccl19/H2-Q7/Stat5a/Prkcq/Cblb/H2-DMb2/H2-Q6/Igfbp2/H2-Q2/H2-M2	24	GO_BP	down
GO:0021953	central nervous system neuron differentiation	20/871	212/28891	7.37012e-06	0.00016559	0.00010738	Gnaq/Atxn2/Herc1/Mycbp2/Tox/Dync2h1/Rapgef2/B2m/Gli3/Prkca/Ascl1/Rora/Ophn1/Cdh11/Dclk1/Sema3a/Gli2/Dmrt3/Brinp2/Sema3e	20	GO_BP	down
GO:1905475	regulation of protein localization to membrane	20/871	212/28891	7.37012e-06	0.00016559	0.00010738	Ank3/Stx8/Nbea/Prkn/Pik3r1/Bcl2l1/Egfr/Ar/Neto2/Camk2b/Itga3/Tcaf2/Pkdcc/Grip1/Magi2/Myo5a/Ptn/Gpc3/Lypd1/Gpc5	20	GO_BP	down
GO:0010594	regulation of endothelial cell migration	18/871	177/28891	7.41508e-06	0.000165889	0.000107574	Hif1a/Plpp3/Rin2/Svbp/Map3k3/Krit1/Sp100/Map2k3/Prkca/Grn/Stat5a/Apoe/Serpinf1/Akt3/Fut1/Hdac9/Prkd1/Angpt1	18	GO_BP	down
GO:1901653	cellular response to peptide	27/871	346/28891	7.59335e-06	0.000169154	0.000109691	Stat3/Mbd5/Ncoa2/Stat5b/Gkap1/Ptpn22/Pik3r1/Ptprj/Stxbp4/Sos1/Abcc1/Cpeb1/Prkca/Ptpra/Sik2/Stat5a/Prkcq/Igf1r/Akt3/Ghr/Zfp36l1/Hdac9/Myo5a/Prkd1/Lpl/Grb10/Vim	27	GO_BP	down
GO:0007041	lysosomal transport	15/871	128/28891	7.64024e-06	0.000169477	0.000109901	Nedd4/Hook3/Stx8/Ap3b1/Snx16/Ccdc91/Ap1g1/Hook2/Rab34/Prkn/Vps41/Gprasp1/Grn/Trak2/Slc30a2	15	GO_BP	down
GO:0051651	maintenance of location in cell	22/871	250/28891	8.07445e-06	0.000178353	0.000115657	Ank3/Flna/Tmsb10/Vps13a/Plcb4/Gaa/Sp100/Prkce/Pde4d/Ccl19/Ccdc88a/Tspo/Arhgap21/Trpm2/Srgn/Pkd2/Apoe/Plce1/Syne1/Myo5a/Prkd1/Slc8a1	22	GO_BP	down
GO:0051091	positive regulation of DNA-binding transcription factor activity	23/871	269/28891	8.14758e-06	0.000179212	0.000116214	Stat3/Plpp3/Crebbp/Rigi/Trim12c/Flot2/Ep300/Trim25/Tgfbr3/Stk3/Traf5/Sav1/Trim12a/Hipk2/Sp100/Hdac4/Ar/Prkcq/Trim37/Trim30a/Eda/Prkd1/Fzd2	23	GO_BP	down
GO:0045444	fat cell differentiation	23/871	270/28891	8.65774e-06	0.000189637	0.000122974	Med1/Mapk14/Ncor2/Ep300/Stk3/Sav1/Grk5/Bnip3/Itga6/Arl6/Rora/Sfrp1/Psmb8/Zfp36l2/Tgfb1i1/Lamb3/Steap4/Fbn1/Zfp36l1/Lama4/Lpl/Zbtb16/Zfpm2	23	GO_BP	down
GO:0010634	positive regulation of epithelial cell migration	17/871	162/28891	8.69445e-06	0.000189648	0.000122981	Hif1a/Plpp3/Rin2/Bmpr2/Map3k3/Prkce/Map2k3/Prkca/Grn/Stat5a/Glipr2/Itga3/Akt3/Fut1/Hdac9/Prkd1/Angpt1	17	GO_BP	down
GO:0050807	regulation of synapse organization	25/871	309/28891	8.80226e-06	0.000190467	0.000123512	Nectin1/Setd5/Nedd4/Mycbp2/Mapk14/Asap1/Pik3r1/Tiam1/Mfn1/Prkca/Efna5/Camk2b/Adgrl2/Srgn/Abhd17c/Apoe/Epha7/Nlgn1/Robo1/Pak3/Magi2/Mdga2/Ptn/Colq/Lingo2	25	GO_BP	down
GO:0001570	vasculogenesis	13/871	99/28891	8.80476e-06	0.000190467	0.000123512	Rin2/Qki/Rapgef2/Tgfbr3/Ptprj/Zfp950/Wars2/Myo1e/Adm/Xdh/Zfp36l1/Angpt1/Zfpm2	13	GO_BP	down
GO:0001666	response to hypoxia	21/871	233/28891	8.93429e-06	0.000192473	0.000124813	Hif1a/Stat3/Ep300/Birc2/Bnip3/Prkce/Scap/Atm/Cpeb1/Ajuba/Pdk3/Vegfb/Kcnma1/Rora/Kcnk2/Ang/Stox1/Zfp36l1/Egln3/Cbfa2t3/Slc8a1	21	GO_BP	down
GO:0099560	synaptic membrane adhesion	8/871	36/28891	9.45048e-06	0.000202759	0.000131483	Mapk14/Cadm1/Efna5/Itga3/Nlgn1/Magi2/Mdga2/Lrrc4c	8	GO_BP	down
GO:0002863	positive regulation of inflammatory response to antigenic stimulus	9/871	47/28891	9.61771e-06	0.000205505	0.000133264	H2-D1/H2-K1/H2-T22/H2-Q4/H2-Q7/H2-Q6/H2-Q2/H2-M2/C3	9	GO_BP	down
GO:0032673	regulation of interleukin-4 production	10/871	59/28891	9.71052e-06	0.000206645	0.000134003	H2-D1/H2-K1/H2-T22/H2-Q4/Il20rb/H2-Q7/Prkcq/H2-Q6/H2-Q2/H2-M2	10	GO_BP	down
GO:0006898	receptor-mediated endocytosis	23/871	272/28891	9.76591e-06	0.000206982	0.000134221	Nedd4/Fcho2/Atxn2/Pikfyve/Fnbp1l/Cd63/Itch/Lpar1/Tbc1d5/Cxcl16/B2m/Cd44/Prkca/Ccl19/Adm/Ophn1/Calcrl/Apoe/Magi2/Ldlr/Angpt1/C3/Fcer2a	23	GO_BP	down
GO:0032956	regulation of actin cytoskeleton organization	27/871	351/28891	9.85338e-06	0.000207994	0.000134878	Braf/Synpo2/Cd47/Cyrib/Flna/Tmsb10/Washc2/Ep300/Prkn/Nf2/Pik3r1/Washc4/Lpar1/Prkce/Flii/Shroom2/Prkcq/Ccdc88a/Efna5/Trpm2/Lmod1/Phldb2/Swap70/Pak3/Alox15/Pam/Prkd1	27	GO_BP	down
GO:0042326	negative regulation of phosphorylation	28/871	372/28891	1.0173e-05	0.000213879	0.000138694	Gnaq/Plpp3/Rassf2/Impact/Sh3bp5/Cdk5rap2/Mvp/Prkn/Nf2/Ptpn22/Lrrk1/Ptprj/Plec/Adar/Cadm1/Gadd45g/Ajuba/Prkca/Gstp1/Pde4d/Prkag2/Cblb/Sfrp1/Apoe/Xdh/Angpt1/Slc8a1/Grb10	28	GO_BP	down
GO:0007034	vacuolar transport	17/871	165/28891	1.11005e-05	0.000232445	0.000150733	Nedd4/Hook3/Stx8/Ap3b1/Snx16/Vti1a/Ccdc91/Ap1g1/Hook2/Vps13a/Rab34/Prkn/Vps41/Gprasp1/Grn/Trak2/Slc30a2	17	GO_BP	down
GO:0003007	heart morphogenesis	24/871	294/28891	1.13998e-05	0.000237761	0.00015418	Nedd4/Hif1a/Ext1/Notch2/Kdm2a/Bmpr2/Med1/Pds5a/Flna/Ncor2/Kat6a/Tead1/Tgfbr3/Sav1/Gaa/Sos1/Ccn1/Pkd2/Robo1/Fzd2/Angpt1/Robo2/Slc8a1/Zfpm2	24	GO_BP	down
GO:0002703	regulation of leukocyte mediated immunity	25/871	314/28891	1.1598e-05	0.000240935	0.000156239	H2-D1/H2-K1/Tap1/Bcr/H2-T22/Rigi/Cyrib/Lgals9/Ap1g1/Rif1/Stat5b/Trp53bp1/Cadm1/B2m/Serpinb9/H2-Q4/H2-M3/Il20rb/H2-Q7/Stat5a/H2-Q6/H2-Q2/H2-M2/C3/Fcer2a	25	GO_BP	down
GO:0048041	focal adhesion assembly	12/871	87/28891	1.16471e-05	0.000240998	0.00015628	Iqgap1/Bcr/Ptprj/Peak1/Ajuba/Ptprk/Ptpra/Efna5/Actn1/Wdpcp/Cdh11/Phldb2	12	GO_BP	down
GO:0051961	negative regulation of nervous system development	18/871	183/28891	1.17692e-05	0.000242567	0.000157297	Ttc3/Hook3/Kifap3/Rapgef2/Nf2/Ywhah/B2m/Cysltr2/Ski/Fgf13/Tspo/Trak2/Epha7/Robo1/Ldlr/Ptn/Sema3a/Sema3e	18	GO_BP	down
GO:0072593	reactive oxygen species metabolic process	22/871	257/28891	1.24924e-05	0.000256461	0.000166307	Hif1a/Stat3/Bcr/Gbf1/Mapk14/Pikfyve/Prkn/Aatf/Birc2/Bnip3/Hdac4/Fbln5/Abcb7/Egfr/Gstp1/Pdk3/Ccn1/Tspo/Xdh/Trim30a/Cyp1b1/Gpx3	22	GO_BP	down
GO:0042063	gliogenesis	29/871	397/28891	1.2544e-05	0.000256515	0.000166342	Stat3/Plpp3/Qki/Nr3c1/Exoc4/Notch2/Nf2/Tiam1/Ptprj/Plec/Itgb4/Il6st/Sos1/Abcc1/Cysltr2/Gli3/Large1/Egfr/Ski/Ptpra/Grn/Ifngr1/Ascl1/Tspo/Ptprz1/Pmp22/Ldlr/Ptn/Vim	29	GO_BP	down
GO:0071375	cellular response to peptide hormone stimulus	24/871	296/28891	1.27606e-05	0.000259929	0.000168556	Stat3/Mbd5/Ncoa2/Stat5b/Gkap1/Pik3r1/Ptprj/Stxbp4/Sos1/Cpeb1/Prkca/Ptpra/Sik2/Stat5a/Prkcq/Igf1r/Akt3/Ghr/Zfp36l1/Hdac9/Myo5a/Prkd1/Lpl/Grb10	24	GO_BP	down
GO:0034341	response to type II interferon	16/871	150/28891	1.29035e-05	0.00026182	0.000169782	Stx8/Med1/Cd47/Zyx/Cxcl16/Stxbp4/Sp100/Shfl/Myo18a/Gbp7/Ccl19/H2-Q7/Ifngr1/Ciita/Aqp4/Vim	16	GO_BP	down
GO:2000628	regulation of miRNA metabolic process	12/871	88/28891	1.31203e-05	0.000265192	0.000171969	Ncor1/Hif1a/Stat3/Smad1/Nr3c1/Ncor2/Ep300/Tead1/Hdac4/Egfr/Ar/Drosha	12	GO_BP	down
GO:0030518	intracellular steroid hormone receptor signaling pathway	14/871	118/28891	1.3225e-05	0.00026628	0.000172674	Ncor1/Nedd4/Nr3c1/Ddx17/Ncoa2/Med1/Ncor2/Trp63/Ep300/Ywhah/Pias2/Ar/Sfrp1/Cyp7b1	14	GO_BP	down
GO:0050803	regulation of synapse structure or activity	25/871	317/28891	1.36404e-05	0.00027196	0.000176358	Nectin1/Setd5/Nedd4/Mycbp2/Mapk14/Asap1/Pik3r1/Tiam1/Mfn1/Prkca/Efna5/Camk2b/Adgrl2/Srgn/Abhd17c/Apoe/Epha7/Nlgn1/Robo1/Pak3/Magi2/Mdga2/Ptn/Colq/Lingo2	25	GO_BP	down
GO:0002704	negative regulation of leukocyte mediated immunity	13/871	103/28891	1.36407e-05	0.00027196	0.000176358	H2-D1/H2-K1/Tap1/Bcr/H2-T22/Lgals9/Serpinb9/H2-Q4/Il20rb/H2-Q7/H2-Q6/H2-Q2/H2-M2	13	GO_BP	down
GO:0001909	leukocyte mediated cytotoxicity	18/871	185/28891	1.36629e-05	0.00027196	0.000176358	H2-D1/H2-K1/Tap1/H2-T22/Cyrib/Lgals9/Ap1g1/Stat5b/Cadm1/B2m/Serpinb9/H2-Q4/H2-M3/H2-Q7/Stat5a/H2-Q6/H2-Q2/H2-M2	18	GO_BP	down
GO:0060396	growth hormone receptor signaling pathway	6/871	19/28891	1.43023e-05	0.000282538	0.000183217	Stat3/Mbd5/Stat5b/Pik3r1/Stat5a/Ghr	6	GO_BP	down
GO:0071378	cellular response to growth hormone stimulus	6/871	19/28891	1.43023e-05	0.000282538	0.000183217	Stat3/Mbd5/Stat5b/Pik3r1/Stat5a/Ghr	6	GO_BP	down
GO:1903901	negative regulation of viral life cycle	8/871	38/28891	1.44798e-05	0.00028497	0.000184794	Trim12c/Trim25/Trim12a/Trim56/Rad50/Nbn/Ciita/Trim30a	8	GO_BP	down
GO:0044272	sulfur compound biosynthetic process	14/871	119/28891	1.45783e-05	0.000285833	0.000185354	Chst11/Ext1/Fmo1/Ggt5/Gstp1/Pdk3/Pdha1/Xylt1/Extl1/Hs3st3a1/Csgalnact1/Angpt1/Chsy3/Hs3st4	14	GO_BP	down
GO:0032946	positive regulation of mononuclear cell proliferation	18/871	186/28891	1.47084e-05	0.000287307	0.00018631	H2-D1/H2-K1/H2-T22/Adk/Stat5b/Ptpn22/Il6st/Bcl2l1/H2-Q4/Ccl19/H2-Q7/Stat5a/Prkcq/H2-DMb2/H2-Q6/Igfbp2/H2-Q2/H2-M2	18	GO_BP	down
GO:0061614	miRNA transcription	11/871	75/28891	1.48023e-05	0.000288066	0.000186802	Ncor1/Hif1a/Stat3/Smad1/Nr3c1/Ddx17/Ncor2/Tead1/Hdac4/Egfr/Ar	11	GO_BP	down
GO:0030217	T cell differentiation	26/871	339/28891	1.50623e-05	0.000290942	0.000188667	Ncor1/Stat3/Ap3b1/Arid1b/Braf/Tox/Lgals9/Smarcc2/Stat5b/Ptpn22/Sos1/B2m/Gli3/Gadd45g/Cd44/Ccl19/Stat5a/H2-Oa/Rora/Drosha/Psmb11/Zfp36l2/Zfp36l1/Aire/Zeb1/Zbtb16	26	GO_BP	down
GO:0010586	miRNA metabolic process	13/871	104/28891	1.51646e-05	0.000290942	0.000188667	Ncor1/Hif1a/Stat3/Smad1/Nr3c1/Ddx17/Ncor2/Ep300/Tead1/Hdac4/Egfr/Ar/Drosha	13	GO_BP	down
GO:0045185	maintenance of protein location	13/871	104/28891	1.51646e-05	0.000290942	0.000188667	Ank3/Lgals9/Flna/Tmsb10/Vps13a/Sp100/Pkd1/Ccdc88a/Tspo/Srgn/Pkd2/Syne1/Fbn1	13	GO_BP	down
GO:0030178	negative regulation of Wnt signaling pathway	17/871	169/28891	1.52279e-05	0.000290942	0.000188667	G3bp1/Rbms3/Mcc/Mapk14/Prkn/Kremen1/Stk3/Rnf43/Wwox/Gli3/Rnf213/Bicc1/Sfrp1/Apoe/Invs/Gpc3/Grb10	17	GO_BP	down
GO:0050680	negative regulation of epithelial cell proliferation	17/871	169/28891	1.52279e-05	0.000290942	0.000188667	Mcc/Med1/Tgfbr3/Stk3/Krit1/Sav1/B2m/Ptprk/Ar/Sfrp1/Apoe/Xdh/Serpinf1/Robo1/Zeb1/Ptn/Gpc3	17	GO_BP	down
GO:0033002	muscle cell proliferation	23/871	280/28891	1.56022e-05	0.00029701	0.000192602	Gnaq/Hif1a/Stat3/Smad1/Jarid2/Bmpr2/Mapk14/Stat5b/Tgfbr3/Sav1/Pik3r1/Hdac4/Egfr/Prkca/Gstp1/Pde4d/Igf1r/Kcnk2/Ang/Calcrl/Apoe/Angpt1/Zfpm2	23	GO_BP	down
GO:0007157	heterophilic cell-cell adhesion via plasma membrane cell adhesion molecules	9/871	50/28891	1.63108e-05	0.00030892	0.000200325	Nectin1/Lgals9/Scarf2/Tenm3/Cadm1/Alcam/Cdh4/Nlgn1/Lgals1	9	GO_BP	down
GO:0035331	negative regulation of hippo signaling	5/871	12/28891	1.63459e-05	0.00030892	0.000200325	Mapk14/Wwc1/Map2k3/Ajuba/Wwc2	5	GO_BP	down
GO:0002707	negative regulation of lymphocyte mediated immunity	12/871	90/28891	1.6562e-05	0.000310864	0.000201585	H2-D1/H2-K1/Tap1/H2-T22/Lgals9/Serpinb9/H2-Q4/Il20rb/H2-Q7/H2-Q6/H2-Q2/H2-M2	12	GO_BP	down
GO:0046328	regulation of JNK cascade	16/871	153/28891	1.65675e-05	0.000310864	0.000201585	Ncor1/Rassf2/Stk3/Ptpn22/Itch/Hipk2/Fgd4/Gadd45g/Egfr/Map3k10/Gstp1/Ccl19/Igf1r/Sfrp1/Mfhas1/Sh3rf3	16	GO_BP	down
GO:0045619	regulation of lymphocyte differentiation	20/871	224/28891	1.6638e-05	0.00031107	0.00020172	Ap3b1/Arid1b/Braf/Tox/Lgals9/Smarcc2/Stat5b/Sos1/Gli3/Il15ra/Cd44/Ccl19/Stat5a/H2-Oa/Drosha/Sfrp1/Zfp36l2/Zfp36l1/Zeb1/Zbtb16	20	GO_BP	down
GO:0033077	T cell differentiation in thymus	13/871	105/28891	1.6836e-05	0.000313181	0.000203088	Ncor1/Braf/Tox/Stat5b/Sos1/B2m/Gli3/Stat5a/Psmb11/Zfp36l2/Zfp36l1/Aire/Zeb1	13	GO_BP	down
GO:0051054	positive regulation of DNA metabolic process	25/871	321/28891	1.68705e-05	0.000313181	0.000203088	Cct4/Eya4/Arid1b/Tox/Oga/Mbtd1/Smarcc2/Bcl7a/Rif1/Trp53bp1/Map3k4/Atm/Wrn/Atr/Egfr/Rad50/Nbn/Naf1/Prkcq/Polg2/Igf1r/Spidr/Pak3/Cyp1b1/Gli2	25	GO_BP	down
GO:1904951	positive regulation of establishment of protein localization	27/871	362/28891	1.71248e-05	0.000316778	0.000205421	Cct4/Gnaq/Ank3/Hif1a/Mapk14/Oga/Flna/Rab34/Ep300/Prkn/Ptpn22/Abcg1/Pik3r1/Prkce/Edem1/Myo18a/Gli3/Egfr/Gpr27/Prkcq/Ang/Mcu/Trpm2/Tcaf2/Prkd1/Wipf1/Camk4	27	GO_BP	down
GO:0001933	negative regulation of protein phosphorylation	26/871	342/28891	1.75492e-05	0.000322352	0.000209035	Gnaq/Plpp3/Rassf2/Impact/Sh3bp5/Cdk5rap2/Mvp/Prkn/Nf2/Ptpn22/Lrrk1/Ptprj/Plec/Adar/Cadm1/Gadd45g/Prkca/Gstp1/Pde4d/Prkag2/Cblb/Sfrp1/Apoe/Xdh/Angpt1/Slc8a1	26	GO_BP	down
GO:0007265	Ras protein signal transduction	26/871	342/28891	1.75492e-05	0.000322352	0.000209035	Auts2/Arhgef12/Notch2/Bcr/Arhgef11/Rapgef2/Ralgapb/Ralgapa2/Rit1/Lpar1/Tiam1/Dennd1a/Pdpn/Sos1/Arhgap32/Abca1/Arl6/Psd3/Ophn1/Apoe/Plce1/Itga3/Robo1/Rab30/Rgl1/Adra1a	26	GO_BP	down
GO:1902105	regulation of leukocyte differentiation	27/871	363/28891	1.79829e-05	0.000328982	0.000213335	Ap3b1/Arid1b/Braf/Notch2/Rassf2/Tox/Lgals9/Smarcc2/Stat5b/Pik3r1/Tjp2/Sos1/Gli3/Il15ra/Cd44/Prkca/Ccl19/Stat5a/H2-Oa/Drosha/Sfrp1/Zfp36l2/Fbn1/Zfp36l1/Zeb1/Lrrc17/Zbtb16	27	GO_BP	down
GO:0033674	positive regulation of kinase activity	30/871	426/28891	1.80359e-05	0.000328982	0.000213335	Iqgap1/Notch2/Rassf2/Rapgef2/Ccnd3/Tead1/Map3k4/Tiam1/Map2k3/Fgd4/Egfr/Ajuba/Map3k10/Rad50/Nbn/Ccn1/Prkag2/Ccl19/Pkd1/Ccdc88a/Igf1r/Ang/Pkd2/Stox1/Map2k6/Robo1/Ghr/Fbn1/Angpt1/Adra1a	30	GO_BP	down
GO:0010721	negative regulation of cell development	25/871	323/28891	1.87325e-05	0.000340503	0.000220806	Ttc3/Hook3/Kifap3/S1pr3/Rapgef2/Nf2/Pik3r1/Ywhah/Tjp2/B2m/Cysltr2/Gli3/Ski/Cd44/Fgf13/Tspo/Sfrp1/Trak2/Epha7/Fbn1/Ldlr/Ptn/Sema3a/Lrrc17/Sema3e	25	GO_BP	down
GO:0006109	regulation of carbohydrate metabolic process	19/871	208/28891	1.95206e-05	0.000353601	0.000229299	Ncor1/Hif1a/Stat3/Nr3c1/Ncoa2/Supt20/Ppp4r3a/Zbtb20/Ep300/Prkn/Ddb1/Prkce/Hdac4/Pdk3/Prkag2/Sik2/Rora/Cbfa2t3/Grb10	19	GO_BP	down
GO:0010171	body morphogenesis	10/871	64/28891	2.04388e-05	0.000368956	0.000239257	Braf/Crebbp/Kat6a/Ep300/Ski/Zfp950/Flvcr1/Phldb2/Gpc3/Schip1	10	GO_BP	down
GO:0002437	inflammatory response to antigenic stimulus	13/871	107/28891	2.06697e-05	0.000371842	0.000241128	H2-D1/H2-K1/Ext1/Notch2/H2-T22/Serpinb9/H2-Q4/Il20rb/H2-Q7/H2-Q6/H2-Q2/H2-M2/C3	13	GO_BP	down
GO:0002526	acute inflammatory response	15/871	139/28891	2.07791e-05	0.000372529	0.000241573	H2-D1/H2-K1/Stat3/Ext1/H2-T22/Stat5b/Serpinb9/H2-Q4/Gstp1/Il20rb/H2-Q7/H2-Q6/H2-Q2/H2-M2/C3	15	GO_BP	down
GO:0060070	canonical Wnt signaling pathway	24/871	305/28891	2.08934e-05	0.0003733	0.000242074	G3bp1/Rbms3/Gnaq/Mcc/Ext1/Usp34/Mapk14/Btrc/Prkn/Kremen1/Stk3/Lrrk1/Bcl9l/Gli3/Egfr/Ctnnd2/Bicc1/Sfrp1/Apoe/Invs/Eda/Gpc3/Fzd2/Gpc5	24	GO_BP	down
GO:0043401	steroid hormone mediated signaling pathway	14/871	123/28891	2.12929e-05	0.000379145	0.000245864	Ncor1/Nedd4/Nr3c1/Ddx17/Ncoa2/Med1/Ncor2/Trp63/Ep300/Ywhah/Pias2/Ar/Sfrp1/Cyp7b1	14	GO_BP	down
GO:0051222	positive regulation of protein transport	26/871	346/28891	2.14437e-05	0.000380535	0.000246765	Gnaq/Ank3/Hif1a/Mapk14/Oga/Flna/Rab34/Ep300/Prkn/Ptpn22/Abcg1/Pik3r1/Prkce/Edem1/Myo18a/Gli3/Egfr/Gpr27/Prkcq/Ang/Mcu/Trpm2/Tcaf2/Prkd1/Wipf1/Camk4	26	GO_BP	down
GO:0002821	positive regulation of adaptive immune response	17/871	174/28891	2.22787e-05	0.000394017	0.000255508	H2-D1/H2-K1/H2-T22/Cyrib/Rif1/Trp53bp1/B2m/Cd44/H2-Q4/H2-M3/H2-Q7/Prkcq/H2-Q6/H2-Q2/H2-M2/C3/Fcer2a	17	GO_BP	down
GO:0010811	positive regulation of cell-substrate adhesion	15/871	140/28891	2.26342e-05	0.000397618	0.000257843	Rin2/Iqgap1/Braf/Flna/Ptprj/Prkce/Itga6/Npnt/Ccn1/Egflam/Itga3/Alox15/Fut1/Ptn/Pcsk5	15	GO_BP	down
GO:0030101	natural killer cell activation	15/871	140/28891	2.26342e-05	0.000397618	0.000257843	H2-D1/H2-K1/H2-T22/Tox/Lgals9/Ap1g1/Stat5b/Ptpn22/Il15ra/H2-Q4/H2-Q7/Stat5a/H2-Q6/H2-Q2/H2-M2	15	GO_BP	down
GO:0045765	regulation of angiogenesis	24/871	307/28891	2.32407e-05	0.000406906	0.000263866	Hif1a/Stat3/Smad1/Krit1/Hipk2/Sp100/Fbln5/Cysltr2/Prkca/Grn/Wars2/Vegfb/Adm/Hhip/Tspan18/Serpinf1/Akt3/Fut1/Ecscr/Ptn/Prkd1/Cyp1b1/Sema3e/C3	24	GO_BP	down
GO:0050768	negative regulation of neurogenesis	17/871	175/28891	2.39952e-05	0.000417485	0.000270726	Ttc3/Hook3/Kifap3/Rapgef2/Nf2/Ywhah/B2m/Cysltr2/Ski/Fgf13/Tspo/Trak2/Epha7/Ldlr/Ptn/Sema3a/Sema3e	17	GO_BP	down
GO:0045860	positive regulation of protein kinase activity	27/871	369/28891	2.40044e-05	0.000417485	0.000270726	Iqgap1/Notch2/Rassf2/Rapgef2/Ccnd3/Tead1/Map3k4/Tiam1/Map2k3/Fgd4/Egfr/Ajuba/Map3k10/Ccn1/Prkag2/Ccl19/Pkd1/Ccdc88a/Ang/Pkd2/Stox1/Map2k6/Robo1/Ghr/Fbn1/Angpt1/Adra1a	27	GO_BP	down
GO:0001649	osteoblast differentiation	20/871	230/28891	2.44089e-05	0.000423114	0.000274377	Smad1/Rassf2/Bmpr2/Mapk14/Crim1/Trp63/Tgfbr3/Il6st/Adar/Hdac4/Npnt/Wwox/Gli3/Ski/Ccn1/Sfrp1/Map2k6/Prkd1/Gli2/Ucma	20	GO_BP	down
GO:0060004	reflex	7/871	30/28891	2.45262e-05	0.000423744	0.000274785	Auts2/Npnt/Kcnma1/Ascl1/Pmp22/Pcdh15/Adra1a	7	GO_BP	down
GO:0009306	protein secretion	30/871	434/28891	2.56007e-05	0.000440854	0.00028588	Gnaq/Hif1a/Svbp/Cavin1/Dnajc1/Oga/Ap1g1/Rab34/Ep300/Prkn/Abcg1/Tiam1/Gsdmd/Stxbp4/Prkce/Myo18a/Egfr/Pclo/Abca1/Gpr27/Stxbp5/Prkcq/Efna5/Ang/Mcu/Trpm2/Sfrp1/Apoe/Fbn1/Myo5a	30	GO_BP	down
GO:0032736	positive regulation of interleukin-13 production	8/871	41/28891	2.61182e-05	0.000448291	0.000290703	H2-D1/H2-K1/H2-T22/H2-Q4/H2-Q7/H2-Q6/H2-Q2/H2-M2	8	GO_BP	down
GO:0046596	regulation of viral entry into host cell	9/871	53/28891	2.66129e-05	0.000455289	0.000295241	Trim12c/Trim25/Trim12a/Trim56/Rad50/Nbn/Ciita/Lgals1/Trim30a	9	GO_BP	down
GO:0035592	establishment of protein localization to extracellular region	30/871	435/28891	2.67258e-05	0.000455315	0.000295258	Gnaq/Hif1a/Svbp/Cavin1/Dnajc1/Oga/Ap1g1/Rab34/Ep300/Prkn/Abcg1/Tiam1/Gsdmd/Stxbp4/Prkce/Myo18a/Egfr/Pclo/Abca1/Gpr27/Stxbp5/Prkcq/Efna5/Ang/Mcu/Trpm2/Sfrp1/Apoe/Fbn1/Myo5a	30	GO_BP	down
GO:0098781	ncRNA transcription	15/871	142/28891	2.67884e-05	0.000455315	0.000295258	Ncor1/Hif1a/Stat3/Smad1/Nr3c1/Ddx17/Cavin1/Ncor2/Tead1/Macroh2a2/Hdac4/Egfr/Ar/Ang/Ippk	15	GO_BP	down
GO:0060416	response to growth hormone	6/871	21/28891	2.71654e-05	0.000460229	0.000298444	Stat3/Mbd5/Stat5b/Pik3r1/Stat5a/Ghr	6	GO_BP	down
GO:0060828	regulation of canonical Wnt signaling pathway	21/871	251/28891	2.7481e-05	0.000464075	0.000300938	G3bp1/Rbms3/Gnaq/Mcc/Usp34/Mapk14/Btrc/Prkn/Kremen1/Stk3/Lrrk1/Gli3/Egfr/Ctnnd2/Bicc1/Sfrp1/Apoe/Invs/Eda/Gpc3/Gpc5	21	GO_BP	down
GO:0033143	regulation of intracellular steroid hormone receptor signaling pathway	11/871	80/28891	2.762e-05	0.000464923	0.000301488	Ncor1/Nr3c1/Ncoa2/Med1/Ncor2/Trp63/Ep300/Pias2/Ar/Sfrp1/Cyp7b1	11	GO_BP	down
GO:0010595	positive regulation of endothelial cell migration	13/871	110/28891	2.78518e-05	0.00046732	0.000303043	Hif1a/Plpp3/Rin2/Map3k3/Map2k3/Prkca/Grn/Stat5a/Akt3/Fut1/Hdac9/Prkd1/Angpt1	13	GO_BP	down
GO:1901342	regulation of vasculature development	24/871	311/28891	2.86621e-05	0.000478775	0.000310471	Hif1a/Stat3/Smad1/Krit1/Hipk2/Sp100/Fbln5/Cysltr2/Prkca/Grn/Wars2/Vegfb/Adm/Hhip/Tspan18/Serpinf1/Akt3/Fut1/Ecscr/Ptn/Prkd1/Cyp1b1/Sema3e/C3	24	GO_BP	down
GO:0048588	developmental cell growth	23/871	291/28891	2.87537e-05	0.000478775	0.000310471	Ttc3/Auts2/Iqgap1/Nr3c1/Ext1/Impact/Bmpr2/Cpne1/Ep300/Prkn/Tiam1/Cdh4/Arhgap32/Fgf13/Efna5/Apoe/Epha7/Robo1/Dclk1/Sema3a/Syt1/Adra1a/Sema3e	23	GO_BP	down
GO:0140747	regulation of ncRNA transcription	12/871	95/28891	2.88088e-05	0.000478775	0.000310471	Ncor1/Hif1a/Stat3/Smad1/Nr3c1/Ncor2/Tead1/Macroh2a2/Hdac4/Egfr/Ar/Ippk	12	GO_BP	down
GO:0002819	regulation of adaptive immune response	21/871	252/28891	2.91462e-05	0.00048285	0.000313113	H2-D1/H2-K1/H2-T22/Cyrib/Rif1/Trp53bp1/Irf7/B2m/Cd44/H2-Q4/H2-M3/Il20rb/Ccl19/H2-Q7/Prkcq/H2-Q6/Alox15/H2-Q2/H2-M2/C3/Fcer2a	21	GO_BP	down
GO:0002861	regulation of inflammatory response to antigenic stimulus	10/871	67/28891	3.08474e-05	0.000509421	0.000330344	H2-D1/H2-K1/H2-T22/H2-Q4/Il20rb/H2-Q7/H2-Q6/H2-Q2/H2-M2/C3	10	GO_BP	down
GO:0006024	glycosaminoglycan biosynthetic process	9/871	54/28891	3.1088e-05	0.000511779	0.000331873	Chst11/Ext1/Ccnd3/Xylt1/Hs3st3a1/Csgalnact1/Abcc5/Angpt1/Chsy3	9	GO_BP	down
GO:0030326	embryonic limb morphogenesis	15/871	144/28891	3.16009e-05	0.000516397	0.000334868	Gnaq/Chst11/Notch2/Med1/Dync2h1/Trp63/Mbnl1/Gli3/Ski/Flvcr1/Wdpcp/Fras1/Gpc3/Gli2/Zbtb16	15	GO_BP	down
GO:0035113	embryonic appendage morphogenesis	15/871	144/28891	3.16009e-05	0.000516397	0.000334868	Gnaq/Chst11/Notch2/Med1/Dync2h1/Trp63/Mbnl1/Gli3/Ski/Flvcr1/Wdpcp/Fras1/Gpc3/Gli2/Zbtb16	15	GO_BP	down
GO:0009100	glycoprotein metabolic process	26/871	354/28891	3.16645e-05	0.000516397	0.000334868	Hif1a/Chst11/Man1a2/Ext1/Oga/Ep300/Aatf/Uggt1/Mgat4b/Edem1/Galnt17/Large1/Vegfb/Ccl19/Mgat5/Xylt1/Tmtc2/Extl1/Trak2/Gxylt2/Hs3st3a1/Fut1/Csgalnact1/Man1a/Chsy3/Hs3st4	26	GO_BP	down
GO:0000209	protein polyubiquitination	21/871	254/28891	3.27505e-05	0.000532449	0.000345277	Ttc3/Nedd4/Znrf1/Fbxl17/Ube3c/Btrc/Trim12c/Ube2e2/Prkn/Ptpn22/Itch/Traf5/Trim12a/Birc2/Anapc1/Trim56/Rnf213/Ube2l6/Trim30a/Rnf180/Rnf183	21	GO_BP	down
GO:0008544	epidermis development	28/871	397/28891	3.30402e-05	0.000535497	0.000347253	Ncor1/Ap3b1/Ext1/Bcr/Med1/Ncor2/Trp63/Mysm1/Sav1/Plec/Macroh2a2/Trps1/Sos1/Mfsd12/Tfdp1/Egfr/Krt7/Kcnma1/Kazn/Igf1r/Edaradd/Pou2f3/Wdpcp/Zfp36l1/Myo5a/Pcdh15/Eda/Gli2	28	GO_BP	down
GO:0038061	non-canonical NF-kappaB signal transduction	14/871	128/28891	3.34097e-05	0.000539815	0.000350053	Ank3/Crebbp/Rassf2/Nfkb2/Btrc/Cpne1/Ep300/Ptpn22/Birc2/Egfr/Trim56/Ccl19/Edaradd/Eda	14	GO_BP	down
GO:0098773	skin epidermis development	16/871	162/28891	3.37039e-05	0.000542892	0.000352049	Ncor1/Ap3b1/Ext1/Ncor2/Trp63/Mysm1/Sav1/Plec/Trps1/Sos1/Mfsd12/Egfr/Edaradd/Myo5a/Eda/Gli2	16	GO_BP	down
GO:0034504	protein localization to nucleus	25/871	335/28891	3.43729e-05	0.000551882	0.000357878	Stat3/Otud7b/Crebbp/Med1/Mapk14/Flna/Pikfyve/Ep300/Tnpo1/Stk3/Nf2/Ptpn22/Pik3r1/Adar/Sp100/Wrn/Gli3/Ipo11/Prkcq/Mfhas1/Syne1/Prkd1/Dclk1/Angpt1/Zbtb16	25	GO_BP	down
GO:0071692	protein localization to extracellular region	30/871	441/28891	3.44728e-05	0.000551882	0.000357878	Gnaq/Hif1a/Svbp/Cavin1/Dnajc1/Oga/Ap1g1/Rab34/Ep300/Prkn/Abcg1/Tiam1/Gsdmd/Stxbp4/Prkce/Myo18a/Egfr/Pclo/Abca1/Gpr27/Stxbp5/Prkcq/Efna5/Ang/Mcu/Trpm2/Sfrp1/Apoe/Fbn1/Myo5a	30	GO_BP	down
GO:0002673	regulation of acute inflammatory response	11/871	82/28891	3.49505e-05	0.000557824	0.000361731	H2-D1/H2-K1/H2-T22/H2-Q4/Gstp1/Il20rb/H2-Q7/H2-Q6/H2-Q2/H2-M2/C3	11	GO_BP	down
GO:0014911	positive regulation of smooth muscle cell migration	10/871	68/28891	3.51986e-05	0.000560075	0.000363191	Iqgap1/Stat5b/Lpar1/Il6st/Hdac4/Pde4d/Myo5a/Cyp1b1/Dock4/Pcsk5	10	GO_BP	down
GO:0007254	JNK cascade	17/871	181/28891	3.69911e-05	0.000585633	0.000379765	Ncor1/Rassf2/Stk3/Ptpn22/Itch/Hipk2/Fgd4/Gadd45g/Egfr/Map3k10/Gstp1/Fgf14/Ccl19/Igf1r/Sfrp1/Mfhas1/Sh3rf3	17	GO_BP	down
GO:0060485	mesenchyme development	24/871	316/28891	3.70285e-05	0.000585633	0.000379765	Nedd4/Hif1a/Exoc4/Ddx17/Ext1/Bmpr2/Flna/Tead1/Tgfbr3/Tiam1/Bcl9l/Pdpn/Fam172a/Ldlrad4/Glipr2/Sfrp1/Bnc2/Tgfb1i1/Phldb2/Robo1/Zfp36l1/Sema3a/Robo2/Sema3e	24	GO_BP	down
GO:0031032	actomyosin structure organization	19/871	218/28891	3.74446e-05	0.000590429	0.000382875	Iqgap1/Braf/Cd47/Ep300/Zyx/Nf2/Pik3r1/Lpar1/Cnn2/Plec/Flii/Myo18a/Prkcq/Ccdc88a/Myl9/Lmod1/Phldb2/Prkd1/Myh11	19	GO_BP	down
GO:0048511	rhythmic process	24/871	317/28891	3.89443e-05	0.000612232	0.000397014	Ncor1/Fbxl17/Dyrk1a/Kdm2a/Ncoa2/Crebbp/Mycbp2/Nfkb2/Btrc/Stat5b/Ep300/Ddb1/Dpyd/Egfr/Pde4d/Stat5a/Kcnma1/Igf1r/Setx/Rora/Cyp7b1/Nlgn1/Ptn/Schip1	24	GO_BP	down
GO:0030949	positive regulation of vascular endothelial growth factor receptor signaling pathway	5/871	14/28891	3.92908e-05	0.000613993	0.000398155	Hif1a/Vegfb/Robo1/Angpt1/Grb10	5	GO_BP	down
GO:0048680	positive regulation of axon regeneration	5/871	14/28891	3.92908e-05	0.000613993	0.000398155	Braf/Flna/Grn/Igf1r/Ptn	5	GO_BP	down
GO:0030183	B cell differentiation	17/871	182/28891	3.96779e-05	0.000618196	0.000400881	Top2b/Notch2/Stat5b/Lgals8/Ep300/Pik3r1/Fnip1/Ptprj/Atm/Stat5a/Plcl2/Sfrp1/Zfp36l2/Lgals1/Dock10/Zfp36l1/Hdac9	17	GO_BP	down
GO:0043010	camera-type eye development	27/871	380/28891	3.99685e-05	0.000620875	0.000402619	Nectin1/Hif1a/Kmt2c/Stat3/Notch2/Col4a1/Bmpr2/Med1/Pds5a/Nf2/Hipk2/Tenm3/Sos1/Gli3/Large1/Egfr/Ski/Grn/Ttll5/Arl6/Shroom2/Wdpcp/Zeb1/Ptn/Cyp1b1/C3/Vim	27	GO_BP	down
GO:0007163	establishment or maintenance of cell polarity	20/871	239/28891	4.21997e-05	0.000651668	0.000422587	Ank3/Exoc4/Pard3b/Gbf1/Map4/Cyrib/Cdk5rap2/Flot2/Krit1/Frmd4b/Myo18a/Fgf13/Ccl19/Pkd1/Igf1r/Wdpcp/Sdccag8/Ophn1/Amotl2/Phldb2	20	GO_BP	down
GO:0050777	negative regulation of immune response	20/871	239/28891	4.21997e-05	0.000651668	0.000422587	Pcbp2/H2-D1/H2-K1/Tap1/Bcr/H2-T22/Lgals9/Stat2/Adar/Serpinb9/H2-Q4/Grn/Samhd1/Il20rb/H2-Q7/Dhx58/H2-Q6/Alox15/H2-Q2/H2-M2	20	GO_BP	down
GO:0050671	positive regulation of lymphocyte proliferation	17/871	183/28891	4.2536e-05	0.000653009	0.000423456	H2-D1/H2-K1/H2-T22/Adk/Stat5b/Ptpn22/Il6st/H2-Q4/Ccl19/H2-Q7/Stat5a/Prkcq/H2-DMb2/H2-Q6/Igfbp2/H2-Q2/H2-M2	17	GO_BP	down
GO:1902905	positive regulation of supramolecular fiber organization	17/871	183/28891	4.2536e-05	0.000653009	0.000423456	Braf/Synpo2/Cd47/Flna/Cdk5rap2/Pde4dip/Ep300/Nf2/Lpar1/Prkce/Prkcq/Ccdc88a/Togaram1/Lmod1/Swap70/Alox15/Prkd1	17	GO_BP	down
GO:0070661	leukocyte proliferation	29/871	425/28891	4.38275e-05	0.000670868	0.000435038	H2-D1/H2-K1/H2-T22/Lgals9/Ccnd3/Adk/Stat5b/Ptpn22/Itch/Cnn2/Il6st/Sos1/Bcl2l1/Atm/Cd44/H2-Q4/Gstp1/Il20rb/Ccl19/H2-Q7/Stat5a/Prkcq/Cblb/Plcl2/H2-DMb2/H2-Q6/Igfbp2/H2-Q2/H2-M2	29	GO_BP	down
GO:0070665	positive regulation of leukocyte proliferation	18/871	202/28891	4.44657e-05	0.000678653	0.000440085	H2-D1/H2-K1/H2-T22/Adk/Stat5b/Ptpn22/Il6st/Bcl2l1/H2-Q4/Ccl19/H2-Q7/Stat5a/Prkcq/H2-DMb2/H2-Q6/Igfbp2/H2-Q2/H2-M2	18	GO_BP	down
GO:0010038	response to metal ion	24/871	320/28891	4.52379e-05	0.000688431	0.000446426	Ank3/Cpne3/Iqgap1/Braf/Cpne1/Ep300/Bnip3/B2m/Mt1/Egfr/Mt2/Crip1/Kcnma1/Camk2b/Trpm2/Pkd2/Xdh/Nlgn1/Slc30a2/Alox15/Pcdh15/Pam/Plscr2/Syt1	24	GO_BP	down
GO:0002824	positive regulation of adaptive immune response based on somatic recombination of immune receptors built from immunoglobulin superfamily domains	16/871	166/28891	4.53976e-05	0.00068886	0.000446704	H2-D1/H2-K1/H2-T22/Cyrib/Rif1/Trp53bp1/B2m/H2-Q4/H2-M3/H2-Q7/Prkcq/H2-Q6/H2-Q2/H2-M2/C3/Fcer2a	16	GO_BP	down
GO:0001890	placenta development	17/871	184/28891	4.55748e-05	0.000689549	0.000447152	Hif1a/Notch2/Bmpr2/Med1/Mapk14/Bptf/Stk3/Map3k4/Birc2/Egfr/Ccn1/Pkd1/Adm/Pkd2/Zfp36l1/Ptn/Slc8a1	17	GO_BP	down
GO:0110053	regulation of actin filament organization	22/871	280/28891	4.65065e-05	0.000701619	0.000454978	Braf/Synpo2/Cd47/Cyrib/Flna/Tmsb10/Washc2/Prkn/Nf2/Pik3r1/Washc4/Lpar1/Prkce/Flii/Shroom2/Prkcq/Ccdc88a/Lmod1/Phldb2/Swap70/Pak3/Alox15	22	GO_BP	down
GO:1901987	regulation of cell cycle phase transition	30/871	449/28891	4.79619e-05	0.000719887	0.000466824	Kmt2e/Arid1b/Crebbp/Ankrd17/Mapk14/Brd4/Cdk5rap2/Smarcc2/Trp63/Ube2e2/Bcl7a/Trp53bp1/Ddb1/Stxbp4/Pdpn/Fem1b/Atm/Atr/Egfr/Rad50/Nbn/Pkd1/Prkcq/Stk33/Cdc14b/Pkd2/Zfp36l2/Stox1/Zfp36l1/Myo16	30	GO_BP	down
GO:0007416	synapse assembly	19/871	222/28891	4.79924e-05	0.000719887	0.000466824	Nectin1/Setd5/Mycbp2/Pik3r1/Cadm1/Large1/Pclo/Prkca/Fgf13/Efna5/Adgrl2/Epha7/Nlgn1/Robo1/Lgi2/Magi2/Mdga2/Colq/Lingo2	19	GO_BP	down
GO:0008589	regulation of smoothened signaling pathway	12/871	100/28891	4.82653e-05	0.00072191	0.000468137	Fbxl17/Ttc23/Dync2h1/Prkacb/Rab34/Gli3/Arl6/Rora/Sfrp1/Hhip/Gpc3/Gli2	12	GO_BP	down
GO:0014909	smooth muscle cell migration	13/871	116/28891	4.8984e-05	0.000729535	0.000473081	Iqgap1/Stat5b/Lpar1/Il6st/Hdac4/Zfp950/Gstp1/Pde4d/Myo5a/Cyp1b1/Dock4/Pcsk5/Grb10	13	GO_BP	down
GO:0002218	activation of innate immune response	22/871	281/28891	4.90537e-05	0.000729535	0.000473081	Stmp1/Ap3b1/Znrf1/Rigi/Ankrd17/Trim12c/Trim25/Ptpn22/Pik3r1/Trim12a/Irf7/Prkce/Mapkapk3/Gbp7/Rps6ka3/Dhx58/Zbp1/Mfhas1/Trim30a/Ddx60/Prkd1/Ifi211	22	GO_BP	down
GO:0071900	regulation of protein serine/threonine kinase activity	25/871	343/28891	5.05369e-05	0.000749464	0.000486004	Iqgap1/Synpo2/Rapgef2/Cdk5rap2/Ccnd3/Tead1/Ptpn22/Map3k4/Tiam1/Ptprj/Fgd4/Egfr/Ajuba/Map3k10/Gstp1/Ccl19/Pkd1/Sfrp1/Pkd2/Apoe/Pmp22/Map2k6/Robo1/Ghr/Slc8a1	25	GO_BP	down
GO:0007224	smoothened signaling pathway	16/871	168/28891	5.24857e-05	0.000776166	0.00050332	Ext1/Fbxl17/Ttc23/Dync2h1/Prkacb/Rab34/Hipk2/Gli3/Map3k10/Arl6/Rora/Wdpcp/Sfrp1/Hhip/Gpc3/Gli2	16	GO_BP	down
GO:0050920	regulation of chemotaxis	20/871	243/28891	5.32904e-05	0.000785846	0.000509597	Mycbp2/Bmpr2/Cyrib/Lpar1/Tiam1/Ptprj/Prkca/Mospd2/Gstp1/Vegfb/Ccl19/Mmp28/Mcu/Swap70/Robo1/Ptn/Prkd1/Sema3a/Robo2/Sema3e	20	GO_BP	down
GO:0043473	pigmentation	13/871	117/28891	5.3609e-05	0.000788324	0.000511204	Gnaq/Ap3b1/Ap1g1/Pikfyve/Mysm1/Cd63/Mfsd12/Gli3/Fig4/Shroom2/Apoe/Myo5a/Eda	13	GO_BP	down
GO:0043087	regulation of GTPase activity	25/871	345/28891	5.55213e-05	0.000812986	0.000527197	Pkp4/Iqgap1/Rabgap1/Gapvd1/Bcr/Ralgapa1/Rapgef2/Asap1/Ralgapb/Ralgapa2/Tiam1/Tbc1d5/Dennd1a/Sos1/Itga6/Tbc1d2b/Ajuba/Ccl19/Dock9/Efna5/Tbc1d12/Cblb/Plxna2/Dock10/Rgl1	25	GO_BP	down
GO:0006110	regulation of glycolytic process	9/871	58/28891	5.59074e-05	0.000812986	0.000527197	Ncor1/Hif1a/Stat3/Zbtb20/Ep300/Hdac4/Prkag2/Sik2/Cbfa2t3	9	GO_BP	down
GO:0043536	positive regulation of blood vessel endothelial cell migration	9/871	58/28891	5.59074e-05	0.000812986	0.000527197	Hif1a/Map3k3/Map2k3/Prkca/Stat5a/Akt3/Hdac9/Prkd1/Angpt1	9	GO_BP	down
GO:0052372	modulation by symbiont of entry into host	9/871	58/28891	5.59074e-05	0.000812986	0.000527197	Trim12c/Trim25/Trim12a/Trim56/Rad50/Nbn/Ciita/Lgals1/Trim30a	9	GO_BP	down
GO:0071322	cellular response to carbohydrate stimulus	16/871	169/28891	5.6382e-05	0.000817617	0.000530199	Hif1a/Rab34/Zbtb20/Prkn/Abcg1/Tiam1/Stxbp4/Prkce/Prkca/Pdk3/Gpr27/Igf1r/Efna5/Calcrl/Zfp36l1/Aqp4	16	GO_BP	down
GO:0036293	response to decreased oxygen levels	21/871	264/28891	5.74698e-05	0.00081879	0.00053096	Hif1a/Stat3/Ep300/Birc2/Bnip3/Prkce/Scap/Atm/Cpeb1/Ajuba/Pdk3/Vegfb/Kcnma1/Rora/Kcnk2/Ang/Stox1/Zfp36l1/Egln3/Cbfa2t3/Slc8a1	21	GO_BP	down
GO:0044403	biological process involved in symbiotic interaction	21/871	264/28891	5.74698e-05	0.00081879	0.00053096	Nectin1/Thoc2/Brd4/Pikfyve/Trim12c/Ep300/Prkn/Trim25/Ddb1/Trim12a/Bcl2l1/Trim56/Rad50/Nbn/Gbp7/Ciita/Pi4ka/Pou2f3/Apoe/Lgals1/Trim30a	21	GO_BP	down
GO:0034612	response to tumor necrosis factor	18/871	206/28891	5.74712e-05	0.00081879	0.00053096	Txndc17/Ext1/Tank/Mapk14/Cpne1/Prkn/Traf5/Cxcl16/Birc2/Tjp2/Npnt/Prpf8/Ccl19/Rora/Sfrp1/Zfp36l2/Map4k3/Zfp36l1	18	GO_BP	down
GO:0006517	protein deglycosylation	5/871	15/28891	5.74733e-05	0.00081879	0.00053096	Man1a2/Oga/Edem1/Large1/Man1a	5	GO_BP	down
GO:0070572	positive regulation of neuron projection regeneration	5/871	15/28891	5.74733e-05	0.00081879	0.00053096	Braf/Flna/Grn/Igf1r/Ptn	5	GO_BP	down
GO:1900153	positive regulation of nuclear-transcribed mRNA catabolic process, deadenylation-dependent decay	5/871	15/28891	5.74733e-05	0.00081879	0.00053096	Pabpc1/Tnrc6b/Cpeb3/Zfp36l2/Zfp36l1	5	GO_BP	down
GO:0033673	negative regulation of kinase activity	19/871	225/28891	5.75577e-05	0.00081879	0.00053096	Gnaq/Sh3bp5/Cdk5rap2/Mvp/Prkn/Nf2/Ptpn22/Ptprj/Plec/Adar/Gadd45g/Ajuba/Prkca/Gstp1/Prkag2/Cblb/Sfrp1/Apoe/Slc8a1	19	GO_BP	down
GO:0070371	ERK1 and ERK2 cascade	26/871	367/28891	5.78917e-05	0.00082131	0.000532594	Braf/Notch2/Rapgef2/Ranbp9/Ptpn22/Tiam1/Npnt/Cysltr2/Egfr/Cd44/Prkca/Gstp1/Ccn1/Vegfb/Ccl19/Glipr2/Zfp36l2/Mfhas1/Apoe/Epha7/Zfp36l1/Alox15/Angpt1/Adra1a/C3/Grb10	26	GO_BP	down
GO:0002712	regulation of B cell mediated immunity	12/871	102/28891	5.87628e-05	0.000829173	0.000537693	H2-D1/H2-K1/H2-T22/Rif1/Trp53bp1/H2-Q4/H2-Q7/H2-Q6/H2-Q2/H2-M2/C3/Fcer2a	12	GO_BP	down
GO:0002889	regulation of immunoglobulin mediated immune response	12/871	102/28891	5.87628e-05	0.000829173	0.000537693	H2-D1/H2-K1/H2-T22/Rif1/Trp53bp1/H2-Q4/H2-Q7/H2-Q6/H2-Q2/H2-M2/C3/Fcer2a	12	GO_BP	down
GO:0032943	mononuclear cell proliferation	27/871	389/28891	5.95749e-05	0.000838372	0.000543659	H2-D1/H2-K1/H2-T22/Lgals9/Ccnd3/Adk/Stat5b/Ptpn22/Itch/Il6st/Sos1/Bcl2l1/Atm/Cd44/H2-Q4/Il20rb/Ccl19/H2-Q7/Stat5a/Prkcq/Cblb/Plcl2/H2-DMb2/H2-Q6/Igfbp2/H2-Q2/H2-M2	27	GO_BP	down
GO:0002698	negative regulation of immune effector process	16/871	170/28891	6.05304e-05	0.000849536	0.000550898	H2-D1/H2-K1/Tap1/Bcr/H2-T22/Cd47/Lgals9/Serpinb9/H2-Q4/Grn/Il20rb/H2-Q7/H2-Q6/H2-Q2/Angpt1/H2-M2	16	GO_BP	down
GO:0032656	regulation of interleukin-13 production	8/871	46/28891	6.24448e-05	0.00087406	0.000566801	H2-D1/H2-K1/H2-T22/H2-Q4/H2-Q7/H2-Q6/H2-Q2/H2-M2	8	GO_BP	down
GO:0030323	respiratory tube development	20/871	246/28891	6.32389e-05	0.000880467	0.000570956	Ap3b1/Man1a2/Ext1/Bmpr2/Ncor2/Ep300/Sav1/Cic/Hipk2/Pdpn/Gli3/Ascl1/Hhip/Tnc/Itga3/Pkdcc/Gpc3/Gli2/Pcsk5/Zfpm2	20	GO_BP	down
GO:1901888	regulation of cell junction assembly	20/871	246/28891	6.32389e-05	0.000880467	0.000570956	Nectin1/Setd5/Iqgap1/Mycbp2/Rapgef2/Pik3r1/Ptprj/Peak1/Prkca/Ptpra/Efna5/Wdpcp/Adgrl2/Epha7/Phldb2/Nlgn1/Robo1/Mdga2/Colq/Lingo2	20	GO_BP	down
GO:0006023	aminoglycan biosynthetic process	9/871	59/28891	6.42228e-05	0.000891794	0.000578301	Chst11/Ext1/Ccnd3/Xylt1/Hs3st3a1/Csgalnact1/Abcc5/Angpt1/Chsy3	9	GO_BP	down
GO:1902893	regulation of miRNA transcription	10/871	73/28891	6.56893e-05	0.000909745	0.000589942	Ncor1/Hif1a/Stat3/Smad1/Nr3c1/Ncor2/Tead1/Hdac4/Egfr/Ar	10	GO_BP	down
GO:0051607	defense response to virus	24/871	328/28891	6.67192e-05	0.000921569	0.000597609	Pcbp2/G3bp1/Ddx17/Senp7/Rigi/Trim12c/Trim25/Ptpn22/Itch/Stat2/Trim12a/Shfl/Irf7/Bnip3/Bcl2l1/Trim56/Samhd1/Gbp7/Ifngr1/Dhx58/Zbp1/Trim30a/Ddx60/Plscr2	24	GO_BP	down
GO:0003018	vascular process in circulatory system	20/871	247/28891	6.6904e-05	0.00092169	0.000597688	Hif1a/Nr3c1/Ext1/Bcr/Bmpr2/Tgfbr3/Ptprj/Plec/Tjp2/Abcc1/Egfr/Adm/Kcnma1/Apoe/Irag1/Dock4/Angpt1/Itga1/Adra1a/Slc8a1	20	GO_BP	down
GO:0043393	regulation of protein binding	19/871	228/28891	6.87781e-05	0.000945022	0.000612818	Rapgef2/Ep300/Prkn/Tgfbr3/Stk3/Krit1/Tiam1/Hipk2/B2m/Hdac4/Cald1/Atr/Large1/Pkd1/Cblb/Plcl2/Apoe/Wfikkn2/Angpt1	19	GO_BP	down
GO:0140546	defense response to symbiont	24/871	329/28891	6.99636e-05	0.000958794	0.000621748	Pcbp2/G3bp1/Ddx17/Senp7/Rigi/Trim12c/Trim25/Ptpn22/Itch/Stat2/Trim12a/Shfl/Irf7/Bnip3/Bcl2l1/Trim56/Samhd1/Gbp7/Ifngr1/Dhx58/Zbp1/Trim30a/Ddx60/Plscr2	24	GO_BP	down
GO:0048679	regulation of axon regeneration	7/871	35/28891	7.10523e-05	0.000970326	0.000629227	Braf/Flna/Kremen1/Grn/Igf1r/Xylt1/Ptn	7	GO_BP	down
GO:0032092	positive regulation of protein binding	12/871	104/28891	7.11758e-05	0.000970326	0.000629227	Rapgef2/Ep300/Prkn/Stk3/Krit1/Tiam1/Hipk2/B2m/Cald1/Pkd1/Plcl2/Apoe	12	GO_BP	down
GO:0048754	branching morphogenesis of an epithelial tube	17/871	191/28891	7.27779e-05	0.00098959	0.000641719	Ext1/Col4a1/Med1/Btrc/Npnt/Greb1l/Gli3/Cd44/Pkd1/Ar/Hhip/Tnc/Hs3st3a1/Gpc3/Gli2/Angpt1/Sema3e	17	GO_BP	down
GO:0032616	interleukin-13 production	8/871	47/28891	7.32811e-05	0.000993852	0.000644482	H2-D1/H2-K1/H2-T22/H2-Q4/H2-Q7/H2-Q6/H2-Q2/H2-M2	8	GO_BP	down
GO:0002675	positive regulation of acute inflammatory response	9/871	60/28891	7.3555e-05	0.000994988	0.000645219	H2-D1/H2-K1/H2-T22/H2-Q4/H2-Q7/H2-Q6/H2-Q2/H2-M2/C3	9	GO_BP	down
GO:0010761	fibroblast migration	10/871	74/28891	7.3925e-05	0.000997416	0.000646793	Iqgap1/Braf/Plec/Prkce/Tns1/Wdpcp/Pmp22/Pak3/Schip1/Slc8a1	10	GO_BP	down
GO:0009101	glycoprotein biosynthetic process	22/871	289/28891	7.43602e-05	0.00100071	0.000648928	Chst11/Ext1/Oga/Ep300/Aatf/Uggt1/Mgat4b/Galnt17/Large1/Vegfb/Ccl19/Mgat5/Xylt1/Tmtc2/Extl1/Trak2/Gxylt2/Hs3st3a1/Fut1/Csgalnact1/Chsy3/Hs3st4	22	GO_BP	down
GO:0071456	cellular response to hypoxia	13/871	121/28891	7.61163e-05	0.00101889	0.000660718	Hif1a/Stat3/Ep300/Bnip3/Prkce/Cpeb1/Ajuba/Pdk3/Rora/Kcnk2/Stox1/Zfp36l1/Egln3	13	GO_BP	down
GO:0043523	regulation of neuron apoptotic process	23/871	310/28891	7.61721e-05	0.00101889	0.000660718	Hif1a/Nr3c1/Braf/Prkn/Hipk2/Il6st/Hdac4/Nrbp2/Bcl2l1/Mt1/Atm/Grn/Vegfb/Kcnma1/Ascl1/Ptprz1/Apoe/Epha7/Pak3/Egln3/Angpt1/Itga1/Sema3e	23	GO_BP	down
GO:0017015	regulation of transforming growth factor beta receptor signaling pathway	14/871	138/28891	7.67498e-05	0.00101889	0.000660718	Chst11/Crebbp/Ep300/Tgfbr3/Hipk2/Bcl9l/Npnt/Ski/Ldlrad4/Itga3/Tgfb1i1/Fbn1/Zeb1/Wfikkn2	14	GO_BP	down
GO:0007611	learning or memory	24/871	331/28891	7.68789e-05	0.00101889	0.000660718	Hif1a/Ntan1/Braf/Crebbp/Zzef1/Ep300/Prkn/Cic/Cpeb3/B2m/Large1/Egfr/Prkca/Pde4d/Fgf13/Ctnnd2/Ptprz1/Apoe/Itga3/Cyp7b1/Serpinf1/Ldlr/Ptn/Camk4	24	GO_BP	down
GO:0016311	dephosphorylation	24/871	331/28891	7.68789e-05	0.00101889	0.000660718	Ppp1r12a/Plpp3/Iqgap1/Ptpn14/Ppp4r3a/Btrc/Ptpn22/Mtmr3/Ptprj/Plpp1/Synj2/Npnt/Fig4/Ptprk/Ptpra/Mgat5/Ptprz1/Cdc14b/Plppr4/Mfhas1/Lhpp/Swap70/Magi2/Itga1	24	GO_BP	down
GO:0060326	cell chemotaxis	24/871	331/28891	7.68789e-05	0.00101889	0.000660718	Gbf1/Pikfyve/Lpar1/Tiam1/Cxcl16/Ptprj/Plec/Abcc1/Prkca/Mospd2/Gstp1/Pde4d/Vegfb/Ccl19/Prkcq/Mmp28/Mcu/Trpm2/Cyp7b1/Swap70/Ptn/Prkd1/Dock4/Itga1	24	GO_BP	down
GO:0051056	regulation of small GTPase mediated signal transduction	19/871	230/28891	7.72959e-05	0.00102183	0.000662624	Auts2/Notch2/Bnip2/Bcr/Ralgapa1/Cyrib/Ralgapb/Ralgapa2/Lpar1/Dennd1a/Sos1/Abca1/Psd3/Ophn1/Apoe/Plce1/Itga3/Robo1/Adra1a	19	GO_BP	down
GO:0030218	erythrocyte differentiation	15/871	156/28891	7.98842e-05	0.00104873	0.000680067	Ncor1/Kmt2e/Hif1a/Stat3/Med1/Mapk14/Stat5b/Tgfbr3/Adar/B2m/Flvcr1/Cdin1/Stat5a/Mfhas1/Zfp36l1	15	GO_BP	down
GO:1904375	regulation of protein localization to cell periphery	15/871	156/28891	7.98842e-05	0.00104873	0.000680067	Stx8/Nbea/Pik3r1/Bcl2l1/Egfr/Ar/Neto2/Camk2b/Itga3/Pkdcc/Grip1/Magi2/Myo5a/Lypd1/Gnai1	15	GO_BP	down
GO:0051017	actin filament bundle assembly	16/871	174/28891	7.99316e-05	0.00104873	0.000680067	Braf/Synpo2/Cd47/Flna/Zyx/Prkn/Nf2/Pik3r1/Lpar1/Cald1/Prkcq/Ccdc88a/Actn1/Phldb2/Swap70/Dpysl3	16	GO_BP	down
GO:0036465	synaptic vesicle recycling	11/871	90/28891	8.34927e-05	0.00109271	0.000708589	Fcho2/Prkn/Dennd1a/Synj2/Bcl2l1/Pclo/Grn/Fgf14/Ophn1/Nlgn1/Syt1	11	GO_BP	down
GO:0007528	neuromuscular junction development	9/871	61/28891	8.4001e-05	0.00109662	0.000711125	Nedd4/Col4a1/Mycbp2/Large1/Tnc/Pmp22/Ptn/Colq/Pdzrn3	9	GO_BP	down
GO:0043114	regulation of vascular permeability	8/871	48/28891	8.56329e-05	0.0011116	0.000720842	Nr3c1/Bcr/Ptprj/Plec/Tjp2/Adm/Apoe/Angpt1	8	GO_BP	down
GO:0060323	head morphogenesis	8/871	48/28891	8.56329e-05	0.0011116	0.000720842	Braf/Crebbp/Kat6a/Ep300/Ski/Zfp950/Flvcr1/Schip1	8	GO_BP	down
GO:1901222	regulation of non-canonical NF-kappaB signal transduction	12/871	106/28891	8.57857e-05	0.0011116	0.000720842	Ank3/Crebbp/Rassf2/Cpne1/Ep300/Ptpn22/Birc2/Egfr/Trim56/Ccl19/Edaradd/Eda	12	GO_BP	down
GO:0019827	stem cell population maintenance	18/871	213/28891	8.84788e-05	0.00114367	0.000741635	Rtf1/Hook3/Ddx6/Stat3/Braf/Crebbp/Kat6a/Trp63/Bcl7a/Rif1/Tead1/Sav1/Wdr43/Bcl9l/Ski/Sfrp1/Zfp36l2/Ptn	18	GO_BP	down
GO:0009411	response to UV	15/871	158/28891	9.23202e-05	0.00119039	0.000771928	Nedd4/Crebbp/N4bp1/Mapk14/Ep300/Rev1/Map3k4/Ddb1/Pik3r1/Wrn/Atr/Egfr/Ptprk/Crip1/Map4k3	15	GO_BP	down
GO:0051495	positive regulation of cytoskeleton organization	17/871	195/28891	9.40312e-05	0.00120947	0.000784303	Braf/Synpo2/Cd47/Flna/Cdk5rap2/Pde4dip/Ep300/Nf2/Lpar1/Prkce/Prkcq/Ccdc88a/Togaram1/Lmod1/Swap70/Alox15/Prkd1	17	GO_BP	down
GO:1990778	protein localization to cell periphery	27/871	400/28891	9.50376e-05	0.00121942	0.000790754	Ank3/Fcho2/Stx8/Slmap/Rapgef2/Flna/Nbea/Rab34/Flot2/Pik3r1/Bcl2l1/Large1/Egfr/Fgf13/Arl6/Ar/Ccdc88a/Neto2/Camk2b/Itga3/Tspan18/Pkdcc/Grip1/Magi2/Myo5a/Lypd1/Gnai1	27	GO_BP	down
GO:0006338	chromatin remodeling	31/871	489/28891	9.53076e-05	0.00121989	0.000791062	Chd6/Dek/Nr3c1/Arid1b/Jarid2/Rere/Dyrk1a/Kdm2a/Mbd2/Brd4/Smarcc2/Kcnq1ot1/Kat6a/Bptf/Trp63/Bcl7a/Rif1/Mysm1/Ep300/Kansl1/Scmh1/Ddb1/Macroh2a2/Hdac4/Lrif1/Fam172a/Trim37/Kdm1b/Smarca1/Hdac9/Pcgf5	31	GO_BP	down
GO:1903844	regulation of cellular response to transforming growth factor beta stimulus	14/871	141/28891	9.69036e-05	0.00123729	0.000802347	Chst11/Crebbp/Ep300/Tgfbr3/Hipk2/Bcl9l/Npnt/Ski/Ldlrad4/Itga3/Tgfb1i1/Fbn1/Zeb1/Wfikkn2	14	GO_BP	down
GO:0061572	actin filament bundle organization	16/871	177/28891	9.78689e-05	0.00124658	0.000808368	Braf/Synpo2/Cd47/Flna/Zyx/Prkn/Nf2/Pik3r1/Lpar1/Cald1/Prkcq/Ccdc88a/Actn1/Phldb2/Swap70/Dpysl3	16	GO_BP	down
GO:0048872	homeostasis of number of cells	27/871	401/28891	9.90513e-05	0.00125676	0.000814971	Ncor1/Kmt2e/Hif1a/Stat3/Ap3b1/Atxn2/Ext1/Bcr/Rassf2/Med1/Mapk14/Nbea/Stat5b/Tgfbr3/Adar/Sos1/B2m/Wdr37/Cd44/Flvcr1/Cdin1/Il20rb/Stat5a/Mfhas1/Akt3/Dock10/Zfp36l1	27	GO_BP	down
GO:0051701	biological process involved in interaction with host	15/871	159/28891	9.91485e-05	0.00125676	0.000814971	Nectin1/Thoc2/Pikfyve/Trim12c/Trim25/Ddb1/Trim12a/Bcl2l1/Trim56/Rad50/Nbn/Gbp7/Ciita/Lgals1/Trim30a	15	GO_BP	down
GO:0042692	muscle cell differentiation	30/871	468/28891	0.000100975	0.00127682	0.000827979	Capn2/Smad1/Qki/Nr3c1/Bnip2/Bmpr2/Ankrd17/Mapk14/Ep300/Plec/Hdac4/Npnt/Flii/Large1/Ski/Adm/Rora/Actn1/Myl9/Pmp22/Lmod1/Syne1/Hdac9/Zeb1/Prkd1/Myh11/Wfikkn2/Adra1a/Slc8a1/C3	30	GO_BP	down
GO:0097581	lamellipodium organization	11/871	92/28891	0.000102152	0.00128859	0.000835611	Auts2/Ablim1/Pik3r1/Pdpn/Hdac4/Fgd4/Ajuba/Cd44/Ccdc88a/Plce1/Pmp22	11	GO_BP	down
GO:0055123	digestive system development	14/871	142/28891	0.000104572	0.00130761	0.000847942	Hif1a/Ext1/Trp63/Sav1/Il6st/Gli3/Egfr/Ascl1/Igf1r/Wdpcp/Sfrp1/Pkdcc/Gli2/Pcsk5	14	GO_BP	down
GO:0071478	cellular response to radiation	16/871	178/28891	0.000104585	0.00130761	0.000847942	Nedd4/Tank/Crebbp/N4bp1/Mapk14/Ep300/Ddb1/Pik3r1/Bcl2l1/Atm/Wrn/Atr/Ptprk/Crip1/Sfrp1/Spidr	16	GO_BP	down
GO:0006913	nucleocytoplasmic transport	25/871	359/28891	0.000104658	0.00130761	0.000847942	Ppp1r12a/Nedd4/Thoc2/Stat3/Cpsf6/Ptpn14/Med1/Mapk14/Flna/Ep300/Tnpo1/Stk3/Ptpn22/Pik3r1/Adar/Sp100/Gli3/Ipo11/Pkd1/Prkcq/Ahctf1/Prkd1/Wipf1/Angpt1/Camk4	25	GO_BP	down
GO:0051169	nuclear transport	25/871	359/28891	0.000104658	0.00130761	0.000847942	Ppp1r12a/Nedd4/Thoc2/Stat3/Cpsf6/Ptpn14/Med1/Mapk14/Flna/Ep300/Tnpo1/Stk3/Ptpn22/Pik3r1/Adar/Sp100/Gli3/Ipo11/Pkd1/Prkcq/Ahctf1/Prkd1/Wipf1/Angpt1/Camk4	25	GO_BP	down
GO:0030900	forebrain development	28/871	425/28891	0.000107446	0.00133924	0.000868456	Ncor1/Gnaq/Hook3/Hif1a/Ext1/Top2b/Herc1/Tox/Dync2h1/Rapgef2/Ncor2/Nf2/B2m/Gli3/Wdr37/Large1/Egfr/Ski/Fgf13/Ascl1/Ophn1/Robo1/Fut1/Dclk1/Sema3a/Gli2/Robo2/Sema3e	28	GO_BP	down
GO:0031102	neuron projection regeneration	9/871	63/28891	0.000108655	0.00135109	0.000876141	Braf/Flna/Kremen1/Grn/Adm/Igf1r/Xylt1/Tnc/Ptn	9	GO_BP	down
GO:0002711	positive regulation of T cell mediated immunity	11/871	93/28891	0.000112743	0.00139861	0.000906953	H2-D1/H2-K1/H2-T22/Cyrib/B2m/H2-Q4/H2-M3/H2-Q7/H2-Q6/H2-Q2/H2-M2	11	GO_BP	down
GO:0022604	regulation of cell morphogenesis	21/871	277/28891	0.000113778	0.0014081	0.00091311	Zmym4/Prkn/Nf2/Lpar1/Tiam1/Bcl9l/Pdpn/Pias2/Fgd4/Mfn1/Cd44/Fmnl2/Zmym6/Efna5/Camk2b/Plxna2/Pak3/Grip1/Ptn/Syt1/Sema3e	21	GO_BP	down
GO:0010837	regulation of keratinocyte proliferation	8/871	50/28891	0.000115537	0.0014265	0.000925041	Notch2/Med1/Trp63/Stxbp4/Ptprk/Zfp36l1/Zeb1/Prkd1	8	GO_BP	down
GO:0046651	lymphocyte proliferation	26/871	383/28891	0.000116017	0.00142808	0.000926067	H2-D1/H2-K1/H2-T22/Lgals9/Ccnd3/Adk/Stat5b/Ptpn22/Itch/Il6st/Sos1/Atm/Cd44/H2-Q4/Il20rb/Ccl19/H2-Q7/Stat5a/Prkcq/Cblb/Plcl2/H2-DMb2/H2-Q6/Igfbp2/H2-Q2/H2-M2	26	GO_BP	down
GO:0006790	sulfur compound metabolic process	22/871	298/28891	0.000116211	0.00142808	0.000926067	Chst11/Ext1/Stat5b/Fmo1/Ggt5/Abcb7/Gns/Gstp1/Pdk3/Stat5a/Hmgcs1/Pdha1/Xylt1/Xdh/Extl1/Ghr/Hs3st3a1/Sult5a1/Csgalnact1/Angpt1/Chsy3/Hs3st4	22	GO_BP	down
GO:0098727	maintenance of cell number	18/871	218/28891	0.00011887	0.00145734	0.000945038	Rtf1/Hook3/Ddx6/Stat3/Braf/Crebbp/Kat6a/Trp63/Bcl7a/Rif1/Tead1/Sav1/Wdr43/Bcl9l/Ski/Sfrp1/Zfp36l2/Ptn	18	GO_BP	down
GO:0048708	astrocyte differentiation	11/871	94/28891	0.000124257	0.00151982	0.000985557	Stat3/Plpp3/Nr3c1/Il6st/Abcc1/Large1/Egfr/Grn/Ifngr1/Ldlr/Vim	11	GO_BP	down
GO:0032869	cellular response to insulin stimulus	18/871	219/28891	0.000125945	0.00153688	0.000996617	Ncoa2/Gkap1/Pik3r1/Ptprj/Stxbp4/Sos1/Cpeb1/Prkca/Ptpra/Sik2/Prkcq/Igf1r/Akt3/Zfp36l1/Hdac9/Myo5a/Lpl/Grb10	18	GO_BP	down
GO:0048608	reproductive structure development	24/871	343/28891	0.000132762	0.0016163	0.00104812	Fndc3a/Flna/Trp63/Stat5b/Fem1b/Bcl2l1/Atm/Greb1l/Cd44/Pde4d/Insl6/Stat5a/Ar/Igf1r/Sfrp1/Tnc/Cyp7b1/Serpinf1/Sema3a/Gli2/Angpt1/Schip1/Zfpm2/C3	24	GO_BP	down
GO:0045646	regulation of erythrocyte differentiation	8/871	51/28891	0.000133445	0.0016171	0.00104864	Hif1a/Stat3/Med1/Mapk14/Stat5b/B2m/Stat5a/Zfp36l1	8	GO_BP	down
GO:0048010	vascular endothelial growth factor receptor signaling pathway	8/871	51/28891	0.000133445	0.0016171	0.00104864	Nedd4/Hif1a/Mapk14/Vegfb/Robo1/Prkd1/Angpt1/Grb10	8	GO_BP	down
GO:0030198	extracellular matrix organization	23/871	322/28891	0.00013428	0.00162346	0.00105276	Ext1/Col4a1/Nfkb2/Pdpn/Npnt/Fbln5/Large1/Myo1e/Ccn1/Adamts6/Mmp28/Pmp22/Egflam/Phldb2/Lamb3/Adamts10/Ltbp4/Csgalnact1/Myh11/Cyp1b1/Colq/Antxr1/Tgfbi	23	GO_BP	down
GO:0045229	external encapsulating structure organization	23/871	323/28891	0.000140555	0.00169541	0.00109942	Ext1/Col4a1/Nfkb2/Pdpn/Npnt/Fbln5/Large1/Myo1e/Ccn1/Adamts6/Mmp28/Pmp22/Egflam/Phldb2/Lamb3/Adamts10/Ltbp4/Csgalnact1/Myh11/Cyp1b1/Colq/Antxr1/Tgfbi	23	GO_BP	down
GO:1903510	mucopolysaccharide metabolic process	10/871	80/28891	0.000144051	0.00173153	0.00112285	Chst11/Ext1/Ccnd3/Gns/Cd44/Xylt1/Csgalnact1/Abcc5/Angpt1/Chsy3	10	GO_BP	down
GO:0050821	protein stabilization	17/871	202/28891	0.000144542	0.00173153	0.00112285	Ncor1/Cct4/Gnaq/Plpp3/Rassf2/Flna/Ncor2/Flot2/Ep300/Prkn/Stk3/Sav1/Naa16/Pik3r1/Stxbp4/Grn/Trim37	17	GO_BP	down
GO:1902075	cellular response to salt	17/871	202/28891	0.000144542	0.00173153	0.00112285	Gnaq/Cpne3/Iqgap1/Braf/Cpne1/Prkn/Plec/B2m/Mt1/Large1/Trpm2/Pkd2/Nlgn1/Alox15/Ly6h/Lypd1/Syt1	17	GO_BP	down
GO:0006936	muscle contraction	23/871	324/28891	0.000147089	0.00175003	0.00113484	Flna/Gaa/Hdac4/Map2k3/Cald1/Npnt/Large1/Prkca/Pde4d/Fgf13/Vegfb/Kcnma1/Dsg2/Calcrl/Map2k6/Lmod1/Prkd1/Myh11/Irag1/Dock4/Myl1/Adra1a/Slc8a1	23	GO_BP	down
GO:0043062	extracellular structure organization	23/871	324/28891	0.000147089	0.00175003	0.00113484	Ext1/Col4a1/Nfkb2/Pdpn/Npnt/Fbln5/Large1/Myo1e/Ccn1/Adamts6/Mmp28/Pmp22/Egflam/Phldb2/Lamb3/Adamts10/Ltbp4/Csgalnact1/Myh11/Cyp1b1/Colq/Antxr1/Tgfbi	23	GO_BP	down
GO:0070482	response to oxygen levels	23/871	324/28891	0.000147089	0.00175003	0.00113484	Hif1a/Stat3/Ep300/Birc2/Pdpn/Bnip3/Prkce/Scap/Atm/Cpeb1/Ajuba/Pdk3/Vegfb/Gucy1a2/Kcnma1/Rora/Kcnk2/Ang/Stox1/Zfp36l1/Egln3/Cbfa2t3/Slc8a1	23	GO_BP	down
GO:0046543	development of secondary female sexual characteristics	4/871	10/28891	0.000148993	0.00176727	0.00114602	Med1/Stat5b/Stat5a/Nell2	4	GO_BP	down
GO:0035265	organ growth	18/871	222/28891	0.000149437	0.00176727	0.00114602	Smad1/Nr3c1/Ext1/Jarid2/Mapk14/Wwc1/Ep300/Tgfbr3/Stk3/Sav1/Fbln5/Flvcr1/Ar/Wwc2/Kcnk2/Bnc2/Adra1a/Zfpm2	18	GO_BP	down
GO:0032868	response to insulin	20/871	262/28891	0.000149551	0.00176727	0.00114602	Ncoa2/Mapk14/Gkap1/Pik3r1/Ptprj/Stxbp4/Sos1/Scap/Cpeb1/Prkca/Ptpra/Sik2/Prkcq/Igf1r/Akt3/Zfp36l1/Hdac9/Myo5a/Lpl/Grb10	20	GO_BP	down
GO:0060348	bone development	19/871	242/28891	0.000150902	0.00177921	0.00115376	Smad1/Ext1/Notch2/Mapk14/Lrrk1/Cadm1/Tjp2/Fbln5/Gli3/Large1/Ski/Bbx/Xylt1/Map2k6/Bnc2/Fbn1/Csgalnact1/Lrrc17/Zbtb16	19	GO_BP	down
GO:0071897	DNA biosynthetic process	16/871	184/28891	0.000153996	0.00181161	0.00117478	Cct4/Bmpr2/Rev1/Map3k4/Atm/Wrn/Atr/Tfdp1/Rad50/Naf1/Prkcq/Polg2/Kcnk2/Pola1/Pak3/Cyp1b1	16	GO_BP	down
GO:0090257	regulation of muscle system process	20/871	263/28891	0.000157382	0.0018473	0.00119792	Nr3c1/Jarid2/Oga/Adk/Ep300/Tead1/Hdac4/Cald1/Npnt/Prkca/Pde4d/Fgf13/Kcnma1/Dsg2/Calcrl/Prkd1/Irag1/Dock4/Adra1a/Slc8a1	20	GO_BP	down
GO:0009743	response to carbohydrate	18/871	223/28891	0.00015808	0.00184816	0.00119847	Hif1a/Rab34/Zbtb20/Ep300/Prkn/Abcg1/Tiam1/Stxbp4/Prkce/Prkca/Pdk3/Gpr27/Igf1r/Efna5/Rasal2/Calcrl/Zfp36l1/Aqp4	18	GO_BP	down
GO:0061458	reproductive system development	24/871	347/28891	0.000158161	0.00184816	0.00119847	Fndc3a/Flna/Trp63/Stat5b/Fem1b/Bcl2l1/Atm/Greb1l/Cd44/Pde4d/Insl6/Stat5a/Ar/Igf1r/Sfrp1/Tnc/Cyp7b1/Serpinf1/Sema3a/Gli2/Angpt1/Schip1/Zfpm2/C3	24	GO_BP	down
GO:0030324	lung development	19/871	243/28891	0.000159181	0.00185593	0.00120351	Ap3b1/Man1a2/Ext1/Bmpr2/Ncor2/Ep300/Sav1/Cic/Hipk2/Pdpn/Gli3/Ascl1/Hhip/Tnc/Itga3/Pkdcc/Gpc3/Gli2/Zfpm2	19	GO_BP	down
GO:0042176	regulation of protein catabolic process	25/871	369/28891	0.000160545	0.00186353	0.00120844	Nedd4/Usp25/Ubr3/Fbxo11/Mycbp2/N4bp1/Flna/Btrc/Prkn/Odc1/Itch/Ddb1/Egfr/Samd9l/Pkd1/Cblb/Ophn1/Apoe/Sh3rf3/Trim30a/Ldlr/Ecscr/Gpc3/Rnf180/Cbfa2t3	25	GO_BP	down
GO:0051402	neuron apoptotic process	25/871	369/28891	0.000160545	0.00186353	0.00120844	Hif1a/Nr3c1/Braf/Trp63/Prkn/Hipk2/Il6st/Bnip3/Hdac4/Nrbp2/Bcl2l1/Mt1/Atm/Grn/Vegfb/Kcnma1/Ascl1/Ptprz1/Apoe/Epha7/Pak3/Egln3/Angpt1/Itga1/Sema3e	25	GO_BP	down
GO:0006469	negative regulation of protein kinase activity	17/871	204/28891	0.000162764	0.00188095	0.00121974	Gnaq/Sh3bp5/Cdk5rap2/Mvp/Nf2/Ptpn22/Ptprj/Plec/Adar/Gadd45g/Prkca/Gstp1/Prkag2/Cblb/Sfrp1/Apoe/Slc8a1	17	GO_BP	down
GO:0045807	positive regulation of endocytosis	17/871	204/28891	0.000162764	0.00188095	0.00121974	Bcr/Cd47/Cd63/Tbc1d5/Ptprj/B2m/Bcl2l1/Myo18a/Il15ra/Ccl19/Pros1/Apoe/Nlgn1/Magi2/Gpc3/Angpt1/C3	17	GO_BP	down
GO:0014812	muscle cell migration	13/871	131/28891	0.000171088	0.00197279	0.00127929	Iqgap1/Stat5b/Lpar1/Il6st/Hdac4/Zfp950/Gstp1/Pde4d/Myo5a/Cyp1b1/Dock4/Pcsk5/Grb10	13	GO_BP	down
GO:0070570	regulation of neuron projection regeneration	7/871	40/28891	0.000172823	0.00198841	0.00128942	Braf/Flna/Kremen1/Grn/Igf1r/Xylt1/Ptn	7	GO_BP	down
GO:0071356	cellular response to tumor necrosis factor	16/871	186/28891	0.00017447	0.00199427	0.00129322	Txndc17/Ext1/Tank/Mapk14/Cpne1/Prkn/Traf5/Birc2/Tjp2/Npnt/Prpf8/Ccl19/Rora/Sfrp1/Zfp36l2/Zfp36l1	16	GO_BP	down
GO:0071383	cellular response to steroid hormone stimulus	16/871	186/28891	0.00017447	0.00199427	0.00129322	Ncor1/Nedd4/Nr3c1/Ddx17/Ncoa2/Med1/Ncor2/Trp63/Ep300/Ywhah/Pias2/Ar/Sfrp1/Zfp36l2/Cyp7b1/Zfp36l1	16	GO_BP	down
GO:0050890	cognition	25/871	371/28891	0.000174475	0.00199427	0.00129322	Setd5/Hif1a/Ntan1/Braf/Crebbp/Zzef1/Ep300/Prkn/Cic/Cpeb3/B2m/Large1/Egfr/Prkca/Pde4d/Fgf13/Ctnnd2/Ptprz1/Apoe/Itga3/Cyp7b1/Serpinf1/Ldlr/Ptn/Camk4	25	GO_BP	down
GO:0031103	axon regeneration	8/871	53/28891	0.000176154	0.00200907	0.00130282	Braf/Flna/Kremen1/Grn/Igf1r/Xylt1/Tnc/Ptn	8	GO_BP	down
GO:0045664	regulation of neuron differentiation	19/871	245/28891	0.000176945	0.00201371	0.00130583	Ttc3/Ddx6/Upf3b/Bnip2/Impact/Med1/Tcf12/Cdk5rap2/Cpne1/Tiam1/B2m/Gli3/Nbn/Ascl1/Sfrp1/Nlgn1/Zeb1/Gli2/Brinp2	19	GO_BP	down
GO:0010959	regulation of metal ion transport	29/871	461/28891	0.000180207	0.00204639	0.00132702	Gnaq/Nedd4/Ank3/Ubr3/Fbxo11/Slmap/Oga/Flna/Plcb4/Ahnak/Cd63/Ptpn22/Ywhah/Prkce/B2m/Pde4d/Fgf13/Fgf14/Gem/Tspo/Pkd2/Nkain4/Tspan18/Akt3/Grip1/Grp/Myo5a/Prkd1/Slc8a1	29	GO_BP	down
GO:0009755	hormone-mediated signaling pathway	15/871	168/28891	0.000183224	0.00207166	0.00134341	Ncor1/Nedd4/Nr3c1/Ddx17/Ncoa2/Med1/Ncor2/Trp63/Ep300/Ywhah/Pias2/Ar/Sfrp1/Cyp7b1/Ghr	15	GO_BP	down
GO:0034101	erythrocyte homeostasis	15/871	168/28891	0.000183224	0.00207166	0.00134341	Ncor1/Kmt2e/Hif1a/Stat3/Med1/Mapk14/Stat5b/Tgfbr3/Adar/B2m/Flvcr1/Cdin1/Stat5a/Mfhas1/Zfp36l1	15	GO_BP	down
GO:0032231	regulation of actin filament bundle assembly	12/871	115/28891	0.000187887	0.0021198	0.00137463	Braf/Synpo2/Cd47/Flna/Prkn/Nf2/Pik3r1/Lpar1/Prkcq/Ccdc88a/Phldb2/Swap70	12	GO_BP	down
GO:0060571	morphogenesis of an epithelial fold	6/871	29/28891	0.000193549	0.00217899	0.00141301	Luzp1/Hif1a/Trp63/Egfr/Ar/Gli2	6	GO_BP	down
GO:0043433	negative regulation of DNA-binding transcription factor activity	15/871	169/28891	0.000195579	0.00219711	0.00142476	Anxa4/Ralgapa1/Flna/Kat6a/Itch/Sp100/Hes6/Hdac4/Pias2/Map3k10/Pkd1/Igf1r/Pkd2/Trim37/Cyp1b1	15	GO_BP	down
GO:0032233	positive regulation of actin filament bundle assembly	9/871	68/28891	0.000197874	0.00220081	0.00142716	Braf/Synpo2/Cd47/Flna/Nf2/Lpar1/Prkcq/Ccdc88a/Swap70	9	GO_BP	down
GO:0043903	regulation of biological process involved in symbiotic interaction	9/871	68/28891	0.000197874	0.00220081	0.00142716	Trim12c/Trim25/Trim12a/Trim56/Rad50/Nbn/Ciita/Lgals1/Trim30a	9	GO_BP	down
GO:0006892	post-Golgi vesicle-mediated transport	11/871	99/28891	0.00019801	0.00220081	0.00142716	Ank3/Exoc4/Vti1a/Gbf1/Ccdc91/Ap1g1/Nbea/Exoc6b/Rab34/Pkdcc/Myo5a	11	GO_BP	down
GO:0046718	viral entry into host cell	11/871	99/28891	0.00019801	0.00220081	0.00142716	Nectin1/Pikfyve/Trim12c/Trim25/Trim12a/Trim56/Rad50/Nbn/Ciita/Lgals1/Trim30a	11	GO_BP	down
GO:0048814	regulation of dendrite morphogenesis	11/871	99/28891	0.00019801	0.00220081	0.00142716	Nedd4/Rapgef2/Tiam1/Ywhah/Pias2/Mfn1/Camk2b/Ptprz1/Robo1/Pak3/Grip1	11	GO_BP	down
GO:0050708	regulation of protein secretion	23/871	331/28891	0.000200873	0.00222413	0.00144228	Gnaq/Hif1a/Dnajc1/Oga/Rab34/Ep300/Prkn/Abcg1/Tiam1/Stxbp4/Prkce/Myo18a/Egfr/Gpr27/Stxbp5/Prkcq/Efna5/Ang/Mcu/Trpm2/Sfrp1/Apoe/Fbn1	23	GO_BP	down
GO:0032823	regulation of natural killer cell differentiation	5/871	19/28891	0.000201296	0.00222413	0.00144228	Tox/Lgals9/Stat5b/Il15ra/Stat5a	5	GO_BP	down
GO:0042307	positive regulation of protein import into nucleus	8/871	54/28891	0.000201382	0.00222413	0.00144228	Mapk14/Flna/Ep300/Ptpn22/Pik3r1/Gli3/Prkcq/Prkd1	8	GO_BP	down
GO:0019216	regulation of lipid metabolic process	26/871	398/28891	0.000213074	0.0023483	0.0015228	Ncor1/Capn2/Nr3c1/Ncoa2/Dcaf5/Stat5b/Zbtb20/Mtmr3/Abcg1/Fmo1/Prkce/Scap/Pdk3/Ccn1/Prkag2/Sik2/Ccl19/Stat5a/Kcnma1/Tspo/Rnf213/Igf1r/Rora/Apoe/Ldlr/C3	26	GO_BP	down
GO:0043244	regulation of protein-containing complex disassembly	13/871	134/28891	0.000214506	0.00235911	0.00152981	Mid1/Eml4/Oga/Scaf8/Shfl/Bnip3/Flii/Fgf13/Shroom2/Igf1r/Setx/Lmod1/Swap70	13	GO_BP	down
GO:0002639	positive regulation of immunoglobulin production	10/871	84/28891	0.000216829	0.00237966	0.00154314	H2-D1/H2-K1/H2-T22/Rif1/Trp53bp1/H2-Q4/H2-Q7/H2-Q6/H2-Q2/H2-M2	10	GO_BP	down
GO:0045580	regulation of T cell differentiation	16/871	190/28891	0.000222618	0.00243808	0.00158102	Ap3b1/Arid1b/Braf/Tox/Lgals9/Smarcc2/Stat5b/Sos1/Gli3/Cd44/Ccl19/Stat5a/H2-Oa/Drosha/Zeb1/Zbtb16	16	GO_BP	down
GO:0070672	response to interleukin-15	4/871	11/28891	0.000228545	0.00249257	0.00161635	Stat3/Stat5b/Il15ra/Stat5a	4	GO_BP	down
GO:1905150	regulation of voltage-gated sodium channel activity	4/871	11/28891	0.000228545	0.00249257	0.00161635	Slmap/Fgf13/Fgf14/Grp	4	GO_BP	down
GO:2000378	negative regulation of reactive oxygen species metabolic process	8/871	55/28891	0.000229501	0.00249779	0.00161974	Hif1a/Stat3/Bcr/Prkn/Aatf/Bnip3/Abcb7/Trim30a	8	GO_BP	down
GO:0090090	negative regulation of canonical Wnt signaling pathway	13/871	135/28891	0.000230932	0.00250815	0.00162646	G3bp1/Rbms3/Mcc/Mapk14/Prkn/Kremen1/Stk3/Gli3/Bicc1/Sfrp1/Apoe/Invs/Gpc3	13	GO_BP	down
GO:0040029	epigenetic regulation of gene expression	18/871	230/28891	0.000231823	0.00251261	0.00162935	Nr3c1/Jarid2/Dyrk1a/Kdm2a/Mbd2/Kcnq1ot1/Rif1/Ep300/Kansl1/Ddb1/Macroh2a2/Hdac4/Lrif1/Fam172a/Trim37/Kdm1b/Hdac9/Pcgf5	18	GO_BP	down
GO:0030511	positive regulation of transforming growth factor beta receptor signaling pathway	6/871	30/28891	0.000235805	0.00253151	0.0016416	Crebbp/Ep300/Tgfbr3/Hipk2/Npnt/Tgfb1i1	6	GO_BP	down
GO:1903846	positive regulation of cellular response to transforming growth factor beta stimulus	6/871	30/28891	0.000235805	0.00253151	0.0016416	Crebbp/Ep300/Tgfbr3/Hipk2/Npnt/Tgfb1i1	6	GO_BP	down
GO:0007229	integrin-mediated signaling pathway	11/871	101/28891	0.000236467	0.00253151	0.0016416	Plpp3/Flna/Cd63/Zyx/Itgb4/Itga6/Ptpra/Itga3/Ptn/Itga1/Pcsk5	11	GO_BP	down
GO:0030203	glycosaminoglycan metabolic process	11/871	101/28891	0.000236467	0.00253151	0.0016416	Chst11/Ext1/Ccnd3/Gns/Cd44/Xylt1/Hs3st3a1/Csgalnact1/Abcc5/Angpt1/Chsy3	11	GO_BP	down
GO:0050772	positive regulation of axonogenesis	11/871	101/28891	0.000236467	0.00253151	0.0016416	Braf/Bmpr2/Ep300/Tiam1/Cdh4/Arhgap32/Efna5/Plxna2/Apoe/Robo1/Robo2	11	GO_BP	down
GO:0090100	positive regulation of transmembrane receptor protein serine/threonine kinase signaling pathway	11/871	101/28891	0.000236467	0.00253151	0.0016416	Notch2/Crebbp/Bmpr2/Lgals9/Ep300/Tgfbr3/Hipk2/Npnt/Ccn1/Tgfb1i1/Gpc3	11	GO_BP	down
GO:1990138	neuron projection extension	17/871	211/28891	0.000243284	0.00259917	0.00168548	Ttc3/Auts2/Iqgap1/Impact/Bmpr2/Cpne1/Ep300/Prkn/Tiam1/Cdh4/Arhgap32/Apoe/Robo1/Dclk1/Sema3a/Syt1/Sema3e	17	GO_BP	down
GO:0002573	myeloid leukocyte differentiation	20/871	272/28891	0.000245769	0.00262036	0.00169923	Ap3b1/Nr3c1/Notch2/Rassf2/Med1/Mapk14/Lrrk1/Pik3r1/Tjp2/Large1/Prkca/Ccl19/Stat5a/Sfrp1/Fbn1/Zfp36l1/Gpc3/Lrrc17/Cbfa2t3/Camk4	20	GO_BP	down
GO:0032388	positive regulation of intracellular transport	16/871	192/28891	0.000250742	0.00266795	0.00173009	Nedd4/Ank3/Cpsf6/Mapk14/Flna/Ep300/Nf2/Ptpn22/Pik3r1/Edem1/Gli3/Prkcq/Tcaf2/Prkd1/Wipf1/Camk4	16	GO_BP	down
GO:0099173	postsynapse organization	19/871	252/28891	0.000253565	0.00269252	0.00174601	Asap1/Tiam1/Cadm1/Mfn1/Ctnnd2/Igf1r/Camk2b/Srgn/Abhd17c/Ophn1/Apoe/Itga3/Epha7/Nlgn1/Dock10/Pak3/Magi2/Ptn/Colq	19	GO_BP	down
GO:0072659	protein localization to plasma membrane	22/871	315/28891	0.000255033	0.00270263	0.00175257	Ank3/Fcho2/Stx8/Slmap/Rapgef2/Flna/Rab34/Flot2/Pik3r1/Bcl2l1/Large1/Egfr/Fgf13/Arl6/Ar/Ccdc88a/Camk2b/Itga3/Pkdcc/Grip1/Myo5a/Lypd1	22	GO_BP	down
GO:0120032	regulation of plasma membrane bounded cell projection assembly	17/871	212/28891	0.000257231	0.00270613	0.00175484	Auts2/Map4/Fnbp1l/Pik3r1/Lpar1/Hdac4/Dync2li1/Ccl19/Prkcq/Ccdc88a/Wdpcp/Trpm2/Sdccag8/Plce1/Nlgn1/Syne1/Dpysl3	17	GO_BP	down
GO:0007626	locomotory behavior	20/871	273/28891	0.000257867	0.00270613	0.00175484	Ncor1/Ntan1/Ncoa2/Vps13a/Prkn/Gaa/Hipk2/Prkce/Large1/Fig4/Grn/Fgf14/Kcnma1/Apoe/Pmp22/Myo5a/Pcdh15/Dmrt3/Apba1/Npas3	20	GO_BP	down
GO:0002028	regulation of sodium ion transport	11/871	102/28891	0.000257948	0.00270613	0.00175484	Nedd4/Ank3/Slmap/Ywhah/Fgf13/Fgf14/Nkain4/Akt3/Grip1/Grp/Slc8a1	11	GO_BP	down
GO:0002886	regulation of myeloid leukocyte mediated immunity	11/871	102/28891	0.000257948	0.00270613	0.00175484	H2-D1/H2-K1/Bcr/H2-T22/Rigi/H2-Q4/H2-Q7/H2-Q6/H2-Q2/H2-M2/C3	11	GO_BP	down
GO:0042632	cholesterol homeostasis	11/871	102/28891	0.000257948	0.00270613	0.00175484	Ncor1/Abcg1/Abca1/Tspo/Rora/Apoe/Cyp7b1/Ldlr/Hdac9/Gramd1b/Lpl	11	GO_BP	down
GO:0001942	hair follicle development	12/871	119/28891	0.000259166	0.00271347	0.0017596	Ext1/Trp63/Mysm1/Sav1/Trps1/Sos1/Mfsd12/Egfr/Edaradd/Myo5a/Eda/Gli2	12	GO_BP	down
GO:0060251	regulation of glial cell proliferation	8/871	56/28891	0.000260756	0.00272467	0.00176686	Nf2/Cysltr2/Egfr/Ski/Tspo/Pmp22/Ptn/Vim	8	GO_BP	down
GO:0043116	negative regulation of vascular permeability	5/871	20/28891	0.000261757	0.00272804	0.00176905	Nr3c1/Ptprj/Adm/Apoe/Angpt1	5	GO_BP	down
GO:0016050	vesicle organization	24/871	359/28891	0.000262122	0.00272804	0.00176905	Hook3/Tmcc1/Stx8/Ap3b1/Vti1a/Gbf1/Ap1g1/Hook2/Pikfyve/Fnbp1l/Rab34/Prkn/Vps13b/Abcg1/Washc4/Vps41/Myo18a/Samd9l/Abca1/Shroom2/Srgn/Apoe/Stxbp6/Syt1	24	GO_BP	down
GO:0072073	kidney epithelium development	14/871	155/28891	0.000263672	0.00273873	0.00177598	Smad1/Ext1/Notch2/Npnt/Greb1l/Gli3/Cd44/Myo1e/Sfrp1/Epha7/Hs3st3a1/Gpc3/Basp1/Robo2	14	GO_BP	down
GO:0031647	regulation of protein stability	22/871	316/28891	0.000266516	0.00275733	0.00178804	Ncor1/Cct4/Gnaq/Usp25/Plpp3/Crebbp/Rassf2/Flna/Btrc/Ncor2/Flot2/Ep300/Prkn/Stk3/Nf2/Sav1/Naa16/Pik3r1/Stxbp4/Rnf128/Grn/Trim37	22	GO_BP	down
GO:0061448	connective tissue development	22/871	316/28891	0.000266516	0.00275733	0.00178804	Hif1a/Smad1/Chst11/Ext1/Ncoa2/Bmpr2/Mapk14/Ep300/Vps13b/Trps1/Gli3/Large1/Prkca/Ccn1/Pkd1/Rasal2/Pkdcc/Csgalnact1/Zeb1/Lpl/Gli2/Zbtb16	22	GO_BP	down
GO:1901873	regulation of post-translational protein modification	21/871	295/28891	0.000270208	0.00279002	0.00180924	Auts2/Dek/Hif1a/Svbp/Tank/Mycbp2/N4bp1/Btrc/Ep300/Prkn/Ptpn22/Itch/Kansl1/Birc2/Prkce/Hdac4/Spopl/Tspo/Cblb/Rnf180/Angpt1	21	GO_BP	down
GO:0050885	neuromuscular process controlling balance	9/871	71/28891	0.000275971	0.00283873	0.00184083	Herc1/Bcr/Gaa/Nbn/Kcnma1/Camk2b/Rbfox1/Myo5a/Pcdh15	9	GO_BP	down
GO:0019221	cytokine-mediated signaling pathway	28/871	450/28891	0.00027601	0.00283873	0.00184083	Txndc17/Usp25/Hif1a/Stat3/Ext1/Med1/Cpne1/Stat5b/Prkn/Traf5/Stat2/Il6st/Adar/Tjp2/Irf7/Hdac4/Il15ra/Trim56/Samhd1/Il20rb/Ccl19/Ifngr1/Stat5a/Zbp1/Robo1/Ghr/Eda/Angpt1	28	GO_BP	down
GO:0044409	entry into host	11/871	103/28891	0.000281052	0.00287559	0.00186473	Nectin1/Pikfyve/Trim12c/Trim25/Trim12a/Trim56/Rad50/Nbn/Ciita/Lgals1/Trim30a	11	GO_BP	down
GO:0055092	sterol homeostasis	11/871	103/28891	0.000281052	0.00287559	0.00186473	Ncor1/Abcg1/Abca1/Tspo/Rora/Apoe/Cyp7b1/Ldlr/Hdac9/Gramd1b/Lpl	11	GO_BP	down
GO:0051092	positive regulation of NF-kappaB transcription factor activity	14/871	156/28891	0.000281792	0.00287559	0.00186473	Stat3/Trim12c/Flot2/Ep300/Trim25/Tgfbr3/Traf5/Trim12a/Ar/Prkcq/Trim37/Trim30a/Eda/Prkd1	14	GO_BP	down
GO:0060759	regulation of response to cytokine stimulus	14/871	156/28891	0.000281792	0.00287559	0.00186473	Hif1a/Rigi/Med1/Cpne1/Prkn/Stat2/Il6st/Adar/Irf7/Trim56/Samhd1/Zbp1/Robo1/Angpt1	14	GO_BP	down
GO:0001654	eye development	27/871	428/28891	0.000283759	0.00289003	0.0018741	Nectin1/Hif1a/Kmt2c/Stat3/Notch2/Col4a1/Bmpr2/Med1/Pds5a/Nf2/Hipk2/Tenm3/Sos1/Gli3/Large1/Egfr/Ski/Grn/Ttll5/Arl6/Shroom2/Wdpcp/Zeb1/Ptn/Cyp1b1/C3/Vim	27	GO_BP	down
GO:0051262	protein tetramerization	10/871	87/28891	0.000289762	0.00294544	0.00191003	Cpsf6/Acot13/Trp63/Stk3/B2m/Samhd1/Pkd1/Trpm2/Pkd2/Aqp4	10	GO_BP	down
GO:0072594	establishment of protein localization to organelle	28/871	452/28891	0.000296438	0.00300747	0.00195025	Cct4/Nedd4/Stat3/Ap3b1/Snx16/Med1/Mapk14/Flna/Vps13a/Ep300/Tnpo1/Stk3/Ptpn22/Pik3r1/Adar/Macroh2a2/Edem1/Vps41/Gli3/Ipo11/Prkcq/Tspo/Agk/Trim37/Spidr/Prkd1/Man1a/Angpt1	28	GO_BP	down
GO:0050679	positive regulation of epithelial cell proliferation	18/871	235/28891	0.000301406	0.00305196	0.0019791	Stat3/Notch2/Med1/Trp63/Stxbp4/Egfr/Prkca/Grn/Vegfb/Stat5a/Ar/Ang/Sfrp1/Cyp7b1/Akt3/Ptn/Prkd1/Gli2	18	GO_BP	down
GO:0060491	regulation of cell projection assembly	17/871	215/28891	0.000303323	0.00306543	0.00198784	Auts2/Map4/Fnbp1l/Pik3r1/Lpar1/Hdac4/Dync2li1/Ccl19/Prkcq/Ccdc88a/Wdpcp/Trpm2/Sdccag8/Plce1/Nlgn1/Syne1/Dpysl3	17	GO_BP	down
GO:0051494	negative regulation of cytoskeleton organization	15/871	176/28891	0.000304055	0.00306691	0.0019888	Mid1/Eml4/Dyrk1a/Cyrib/Cdk5rap2/Tmsb10/Prkn/Pik3r1/Flii/Fgf13/Shroom2/Trim37/Lmod1/Phldb2/Swap70	15	GO_BP	down
GO:0043470	regulation of carbohydrate catabolic process	9/871	72/28891	0.000307074	0.00309141	0.00200468	Ncor1/Hif1a/Stat3/Zbtb20/Ep300/Hdac4/Prkag2/Sik2/Cbfa2t3	9	GO_BP	down
GO:0032874	positive regulation of stress-activated MAPK cascade	13/871	139/28891	0.000307853	0.0030933	0.00200591	Mid1/Rassf2/Map3k3/Stk3/Map3k4/Hipk2/Fgd4/Gadd45g/Map3k10/Ccl19/Mfhas1/Sh3rf3/Xdh	13	GO_BP	down
GO:0150063	visual system development	27/871	431/28891	0.000316649	0.0031641	0.00205182	Nectin1/Hif1a/Kmt2c/Stat3/Notch2/Col4a1/Bmpr2/Med1/Pds5a/Nf2/Hipk2/Tenm3/Sos1/Gli3/Large1/Egfr/Ski/Grn/Ttll5/Arl6/Shroom2/Wdpcp/Zeb1/Ptn/Cyp1b1/C3/Vim	27	GO_BP	down
GO:0042113	B cell activation	22/871	320/28891	0.000317118	0.0031641	0.00205182	Top2b/Notch2/Skap2/Rif1/Stat5b/Lgals8/Trp53bp1/Ep300/Pik3r1/Fnip1/Ptprj/Atm/Nbn/Stat5a/Plcl2/Sfrp1/Zfp36l2/Swap70/Lgals1/Dock10/Zfp36l1/Hdac9	22	GO_BP	down
GO:0002822	regulation of adaptive immune response based on somatic recombination of immune receptors built from immunoglobulin superfamily domains	18/871	236/28891	0.000317316	0.0031641	0.00205182	H2-D1/H2-K1/H2-T22/Cyrib/Rif1/Trp53bp1/B2m/H2-Q4/H2-M3/Il20rb/Ccl19/H2-Q7/Prkcq/H2-Q6/H2-Q2/H2-M2/C3/Fcer2a	18	GO_BP	down
GO:0055001	muscle cell development	18/871	236/28891	0.000317316	0.0031641	0.00205182	Nr3c1/Ep300/Plec/Hdac4/Flii/Large1/Ski/Adm/Actn1/Myl9/Pmp22/Lmod1/Hdac9/Prkd1/Myh11/Wfikkn2/Adra1a/Slc8a1	18	GO_BP	down
GO:0010543	regulation of platelet activation	7/871	44/28891	0.000319982	0.00317857	0.0020612	Gnaq/Flna/Ptprj/Pdpn/Prkca/Prkcq/Apoe	7	GO_BP	down
GO:0030521	androgen receptor signaling pathway	7/871	44/28891	0.000319982	0.00317857	0.0020612	Ncor1/Ddx17/Ncor2/Ep300/Pias2/Ar/Sfrp1	7	GO_BP	down
GO:0002709	regulation of T cell mediated immunity	12/871	122/28891	0.000326648	0.00320087	0.00207567	H2-D1/H2-K1/H2-T22/Cyrib/B2m/H2-Q4/H2-M3/Il20rb/H2-Q7/H2-Q6/H2-Q2/H2-M2	12	GO_BP	down
GO:0022404	molting cycle process	12/871	122/28891	0.000326648	0.00320087	0.00207567	Ext1/Trp63/Mysm1/Sav1/Trps1/Sos1/Mfsd12/Egfr/Edaradd/Myo5a/Eda/Gli2	12	GO_BP	down
GO:0022405	hair cycle process	12/871	122/28891	0.000326648	0.00320087	0.00207567	Ext1/Trp63/Mysm1/Sav1/Trps1/Sos1/Mfsd12/Egfr/Edaradd/Myo5a/Eda/Gli2	12	GO_BP	down
GO:0071346	cellular response to type II interferon	12/871	122/28891	0.000326648	0.00320087	0.00207567	Stx8/Med1/Cd47/Zyx/Stxbp4/Myo18a/Gbp7/Ccl19/H2-Q7/Ifngr1/Aqp4/Vim	12	GO_BP	down
GO:0010639	negative regulation of organelle organization	25/871	387/28891	0.000330443	0.00320087	0.00207567	Mid1/Eml4/Dyrk1a/Map4/Cyrib/Cdk5rap2/Tmsb10/Prkn/Pik3r1/Lpar1/Fnip1/Bnip3/Bcl2l1/Atm/Flii/Mfn1/Rad50/Nbn/Fgf13/Shroom2/Tspo/Trim37/Lmod1/Phldb2/Swap70	25	GO_BP	down
GO:0014910	regulation of smooth muscle cell migration	11/871	105/28891	0.000332521	0.00320087	0.00207567	Iqgap1/Stat5b/Lpar1/Il6st/Hdac4/Gstp1/Pde4d/Myo5a/Cyp1b1/Dock4/Pcsk5	11	GO_BP	down
GO:2001222	regulation of neuron migration	8/871	58/28891	0.000333728	0.00320087	0.00207567	Stat3/Rapgef2/Flna/Arhgap32/Camk2b/Ptprz1/Unc5c/Sema3a	8	GO_BP	down
GO:0045787	positive regulation of cell cycle	24/871	365/28891	0.000333835	0.00320087	0.00207567	Kmt2e/Pkp4/Crebbp/Ankrd17/Med1/Brd4/Ccnd3/Trp63/Ube2e2/Cspp1/Stat5b/Stxbp4/Prkce/Egfr/Prkca/Pkd1/Stat5a/Ascl1/Igf1r/Camk2b/Cdc14b/Pkd2/Stox1/Plscr2	24	GO_BP	down
GO:0045637	regulation of myeloid cell differentiation	18/871	237/28891	0.000333951	0.00320087	0.00207567	Hif1a/Stat3/Notch2/Rassf2/Med1/Mapk14/Stat5b/Cnot4/Pik3r1/Tjp2/B2m/Prkca/Stat5a/Sfrp1/Fbn1/Zfp36l1/Lrrc17/Zbtb16	18	GO_BP	down
GO:0070372	regulation of ERK1 and ERK2 cascade	23/871	343/28891	0.00033421	0.00320087	0.00207567	Braf/Notch2/Rapgef2/Ranbp9/Ptpn22/Tiam1/Npnt/Cysltr2/Egfr/Cd44/Prkca/Gstp1/Ccn1/Vegfb/Ccl19/Glipr2/Mfhas1/Apoe/Epha7/Alox15/Angpt1/Adra1a/C3	23	GO_BP	down
GO:1901990	regulation of mitotic cell cycle phase transition	23/871	343/28891	0.00033421	0.00320087	0.00207567	Kmt2e/Arid1b/Crebbp/Ankrd17/Brd4/Cdk5rap2/Smarcc2/Ube2e2/Bcl7a/Ddb1/Pdpn/Atm/Egfr/Rad50/Nbn/Pkd1/Prkcq/Cdc14b/Pkd2/Zfp36l2/Stox1/Zfp36l1/Myo16	23	GO_BP	down
GO:0002399	MHC class II protein complex assembly	4/871	12/28891	0.000334644	0.00320087	0.00207567	B2m/H2-Oa/H2-DMb2/H2-Eb2	4	GO_BP	down
GO:0002503	peptide antigen assembly with MHC class II protein complex	4/871	12/28891	0.000334644	0.00320087	0.00207567	B2m/H2-Oa/H2-DMb2/H2-Eb2	4	GO_BP	down
GO:0009404	toxin metabolic process	4/871	12/28891	0.000334644	0.00320087	0.00207567	As3mt/Fmo1/Pam/Cyp1b1	4	GO_BP	down
GO:0032825	positive regulation of natural killer cell differentiation	4/871	12/28891	0.000334644	0.00320087	0.00207567	Tox/Stat5b/Il15ra/Stat5a	4	GO_BP	down
GO:0036135	Schwann cell migration	4/871	12/28891	0.000334644	0.00320087	0.00207567	Tiam1/Ptprz1/Pmp22/Vim	4	GO_BP	down
GO:0060579	ventral spinal cord interneuron fate commitment	4/871	12/28891	0.000334644	0.00320087	0.00207567	Gli3/Ascl1/Gli2/Dmrt3	4	GO_BP	down
GO:0060581	cell fate commitment involved in pattern specification	4/871	12/28891	0.000334644	0.00320087	0.00207567	Gli3/Ascl1/Gli2/Dmrt3	4	GO_BP	down
GO:2000562	negative regulation of CD4-positive, alpha-beta T cell proliferation	4/871	12/28891	0.000334644	0.00320087	0.00207567	Lgals9/Itch/Cd44/Cblb	4	GO_BP	down
GO:0043405	regulation of MAP kinase activity	16/871	197/28891	0.000334876	0.00320087	0.00207567	Iqgap1/Ptpn22/Map3k4/Tiam1/Ptprj/Fgd4/Egfr/Ajuba/Map3k10/Gstp1/Ccl19/Sfrp1/Apoe/Map2k6/Robo1/Ghr	16	GO_BP	down
GO:0019886	antigen processing and presentation of exogenous peptide antigen via MHC class II	5/871	21/28891	0.000335067	0.00320087	0.00207567	Pikfyve/B2m/H2-Oa/H2-DMb2/H2-Eb2	5	GO_BP	down
GO:0030032	lamellipodium assembly	9/871	73/28891	0.000341019	0.00324588	0.00210485	Auts2/Ablim1/Pik3r1/Hdac4/Fgd4/Ajuba/Ccdc88a/Plce1/Pmp22	9	GO_BP	down
GO:0034340	response to type I interferon	9/871	73/28891	0.000341019	0.00324588	0.00210485	Stat2/Adar/Sp100/Shfl/Irf7/Hdac4/Trim56/Samhd1/Zbp1	9	GO_BP	down
GO:1901185	negative regulation of ERBB signaling pathway	6/871	32/28891	0.000341881	0.00324818	0.00210634	Mvp/Ptprj/Cadm1/Egfr/Cblb/Itga1	6	GO_BP	down
GO:1902904	negative regulation of supramolecular fiber organization	15/871	178/28891	0.000343259	0.00325536	0.002111	Mid1/Eml4/Dyrk1a/Cyrib/Tmsb10/Prkn/Pik3r1/Flii/Fgf13/Shroom2/Apoe/Lmod1/Phldb2/Swap70/Ldlr	15	GO_BP	down
GO:0090596	sensory organ morphogenesis	22/871	322/28891	0.000345441	0.00327013	0.00212058	Nectin1/Eya4/Hif1a/Stat3/Notch2/Bcr/Tshz1/Hipk2/Tenm3/Ttc39c/Gli3/Large1/Ski/Arl6/Shroom2/Wdpcp/Stox1/Pcdh15/Zeb1/Ptn/Fzd2/Gli2	22	GO_BP	down
GO:0038127	ERBB signaling pathway	12/871	123/28891	0.000352215	0.00332224	0.00215437	Cpne3/Iqgap1/Braf/Mvp/Ptprj/Cadm1/Sos1/Egfr/Ccdc88a/Cblb/Plce1/Itga1	12	GO_BP	down
GO:0044000	movement in host	12/871	123/28891	0.000352215	0.00332224	0.00215437	Nectin1/Pikfyve/Trim12c/Trim25/Ddb1/Trim12a/Trim56/Rad50/Nbn/Ciita/Lgals1/Trim30a	12	GO_BP	down
GO:0070304	positive regulation of stress-activated protein kinase signaling cascade	13/871	141/28891	0.000353873	0.00333188	0.00216062	Mid1/Rassf2/Map3k3/Stk3/Map3k4/Hipk2/Fgd4/Gadd45g/Map3k10/Ccl19/Mfhas1/Sh3rf3/Xdh	13	GO_BP	down
GO:0048880	sensory system development	27/871	435/28891	0.000365726	0.0034373	0.00222898	Nectin1/Hif1a/Kmt2c/Stat3/Notch2/Col4a1/Bmpr2/Med1/Pds5a/Nf2/Hipk2/Tenm3/Sos1/Gli3/Large1/Egfr/Ski/Grn/Ttll5/Arl6/Shroom2/Wdpcp/Zeb1/Ptn/Cyp1b1/C3/Vim	27	GO_BP	down
GO:0031952	regulation of protein autophosphorylation	7/871	45/28891	0.000369167	0.00346039	0.00224396	Iqgap1/Rassf2/Impact/Mvp/Rad50/Nbn/Epha7	7	GO_BP	down
GO:0070374	positive regulation of ERK1 and ERK2 cascade	18/871	239/28891	0.000369505	0.00346039	0.00224396	Braf/Notch2/Rapgef2/Ptpn22/Npnt/Cysltr2/Egfr/Cd44/Prkca/Vegfb/Ccl19/Glipr2/Mfhas1/Apoe/Alox15/Angpt1/Adra1a/C3	18	GO_BP	down
GO:1903532	positive regulation of secretion by cell	25/871	390/28891	0.000370572	0.00346418	0.00224642	Gnaq/Hif1a/Nr3c1/Oga/Ap1g1/Rab34/Ep300/Prkn/Abcg1/Prkce/Bcl2l1/Myo18a/Egfr/Prkca/Gpr27/Stxbp5/Prkcq/Ang/Mcu/Trpm2/Map2k6/Nlgn1/Nell2/Prkd1/Syt1	25	GO_BP	down
GO:0048193	Golgi vesicle transport	20/871	281/28891	0.000374945	0.00349003	0.00226317	Ank3/Plpp3/Exoc4/Vti1a/Gbf1/Ccdc91/Atp9b/Ap1g1/Nbea/Exoc6b/Cog5/Rab34/Arf3/Vps41/Myo18a/Nbas/Bcap29/Pkdcc/Myo5a/Prkd1	20	GO_BP	down
GO:0051348	negative regulation of transferase activity	19/871	260/28891	0.000375286	0.00349003	0.00226317	Gnaq/Sh3bp5/Cdk5rap2/Mvp/Prkn/Nf2/Ptpn22/Ptprj/Plec/Adar/Gadd45g/Ajuba/Prkca/Gstp1/Prkag2/Cblb/Sfrp1/Apoe/Slc8a1	19	GO_BP	down
GO:1902808	positive regulation of cell cycle G1/S phase transition	8/871	59/28891	0.000376003	0.00349003	0.00226317	Kmt2e/Crebbp/Ankrd17/Trp63/Ube2e2/Stxbp4/Egfr/Stox1	8	GO_BP	down
GO:2000649	regulation of sodium ion transmembrane transporter activity	8/871	59/28891	0.000376003	0.00349003	0.00226317	Nedd4/Ank3/Slmap/Ywhah/Fgf13/Fgf14/Grip1/Grp	8	GO_BP	down
GO:0043534	blood vessel endothelial cell migration	12/871	124/28891	0.000379454	0.00351582	0.0022799	Hif1a/Map3k3/Map2k3/Prkca/Stat5a/Apoe/Akt3/Robo1/Hdac9/Prkd1/Cyp1b1/Angpt1	12	GO_BP	down
GO:0033627	cell adhesion mediated by integrin	10/871	90/28891	0.000382146	0.00353451	0.00229202	Plpp3/Ext1/Itgb4/Itga6/Npnt/Itga3/Swap70/Fbn1/Cyp1b1/Itga1	10	GO_BP	down
GO:0043254	regulation of protein-containing complex assembly	27/871	437/28891	0.000392693	0.00362566	0.00235113	Stmp1/Dyrk1a/Cyrib/Cdk5rap2/Tmsb10/Pde4dip/Ep300/Ptpn22/Fnip1/Birc2/Prkce/Atm/Atr/Flii/Ajuba/Abca1/Stxbp5/Togaram1/Apoe/Stxbp6/Lmod1/Spidr/Trim30a/Pak3/Alox15/Prkd1/Pcsk5	27	GO_BP	down
GO:0003205	cardiac chamber development	16/871	200/28891	0.000396238	0.00365195	0.00236818	Luzp1/Hif1a/Notch2/Bmpr2/Med1/Tgfbr3/Sav1/Sos1/Greb1l/Ccn1/Adamts6/Robo1/Fzd2/Pcsk5/Robo2/Zfpm2	16	GO_BP	down
GO:0042060	wound healing	24/871	370/28891	0.000406238	0.00373754	0.00242368	Gnaq/Hif1a/Plpp3/Ap3b1/Ext1/Notch2/Flna/Ahnak/Cnn2/Ptprj/Plec/Pdpn/Prkce/Ajuba/Cd44/Prkca/Ccn1/Vegfb/Prkcq/Pros1/Pou2f3/Apoe/Phldb2/Alox15	24	GO_BP	down
GO:0030947	regulation of vascular endothelial growth factor receptor signaling pathway	6/871	33/28891	0.000407283	0.00373819	0.0024241	Nedd4/Hif1a/Vegfb/Robo1/Angpt1/Grb10	6	GO_BP	down
GO:0045445	myoblast differentiation	12/871	125/28891	0.000408452	0.00373819	0.0024241	Ddx17/Arid1b/Mapk14/Smarcc2/Flot2/Mbnl1/Pik3r1/Plec/Bcl9l/Plekhm3/Lgals1/Zfp36l1	12	GO_BP	down
GO:0046620	regulation of organ growth	12/871	125/28891	0.000408452	0.00373819	0.0024241	Nr3c1/Jarid2/Mapk14/Wwc1/Ep300/Tgfbr3/Stk3/Sav1/Flvcr1/Wwc2/Kcnk2/Zfpm2	12	GO_BP	down
GO:0045667	regulation of osteoblast differentiation	14/871	162/28891	0.000414534	0.00378723	0.0024559	Smad1/Rassf2/Bmpr2/Crim1/Trp63/Il6st/Hdac4/Npnt/Gli3/Ski/Ccn1/Sfrp1/Prkd1/Ucma	14	GO_BP	down
GO:0048639	positive regulation of developmental growth	17/871	221/28891	0.000417346	0.00380628	0.00246826	Nr3c1/Bmpr2/Mapk14/Stat5b/Ep300/Prkn/Tgfbr3/Cdh4/Arhgap32/Stat5a/Igf1r/Efna5/Apoe/Ghr/Syt1/Zfpm2/C3	17	GO_BP	down
GO:0010633	negative regulation of epithelial cell migration	9/871	75/28891	0.000418226	0.00380767	0.00246916	Svbp/Mcc/Cd63/Tgfbr3/Krit1/Sp100/Apoe/Serpinf1/Sema3a	9	GO_BP	down
GO:0060443	mammary gland morphogenesis	8/871	60/28891	0.000422533	0.00383698	0.00248816	Nr3c1/Med1/Btrc/Gli3/Stat5a/Ar/Robo1/Gli2	8	GO_BP	down
GO:0045820	negative regulation of glycolytic process	5/871	22/28891	0.00042291	0.00383698	0.00248816	Ncor1/Stat3/Hdac4/Sik2/Cbfa2t3	5	GO_BP	down
GO:0009895	negative regulation of catabolic process	23/871	349/28891	0.000426249	0.00386058	0.00250347	Ncor1/Usp25/Stat3/Qki/Herc1/Mycbp2/N4bp1/Flna/Ep300/Ptpn22/Traf5/Hipk2/Hdac4/Nrbp2/Nbas/Egfr/Naf1/Sik2/Tspo/Rragd/Ophn1/Cbfa2t3/Adra1a	23	GO_BP	down
GO:0045926	negative regulation of growth	19/871	263/28891	0.000432558	0.0039046	0.00253201	Ttc3/Hif1a/Atxn2/Jarid2/Bmpr2/Wwc1/St7l/Stk3/Nf2/Sav1/Ptprj/Fgf13/Wwc2/Kcnk2/Sfrp1/Epha7/Gpc3/Sema3a/Sema3e	19	GO_BP	down
GO:0051963	regulation of synapse assembly	13/871	144/28891	0.000433814	0.0039046	0.00253201	Nectin1/Setd5/Mycbp2/Pik3r1/Prkca/Efna5/Adgrl2/Epha7/Nlgn1/Robo1/Mdga2/Colq/Lingo2	13	GO_BP	down
GO:0006606	protein import into nucleus	15/871	182/28891	0.000434839	0.0039046	0.00253201	Stat3/Med1/Mapk14/Flna/Ep300/Tnpo1/Stk3/Ptpn22/Pik3r1/Adar/Gli3/Ipo11/Prkcq/Prkd1/Angpt1	15	GO_BP	down
GO:0045766	positive regulation of angiogenesis	15/871	182/28891	0.000434839	0.0039046	0.00253201	Hif1a/Stat3/Smad1/Hipk2/Cysltr2/Prkca/Grn/Wars2/Vegfb/Adm/Akt3/Fut1/Prkd1/Cyp1b1/C3	15	GO_BP	down
GO:1904018	positive regulation of vasculature development	15/871	182/28891	0.000434839	0.0039046	0.00253201	Hif1a/Stat3/Smad1/Hipk2/Cysltr2/Prkca/Grn/Wars2/Vegfb/Adm/Akt3/Fut1/Prkd1/Cyp1b1/C3	15	GO_BP	down
GO:0071902	positive regulation of protein serine/threonine kinase activity	16/871	202/28891	0.000442321	0.00396499	0.00257117	Iqgap1/Rapgef2/Ccnd3/Tead1/Map3k4/Tiam1/Fgd4/Egfr/Ajuba/Map3k10/Ccl19/Pkd1/Pkd2/Map2k6/Robo1/Ghr	16	GO_BP	down
GO:0051259	protein complex oligomerization	19/871	264/28891	0.000453263	0.00405613	0.00263027	Kctd1/Cpsf6/Acot13/Trp63/Trp53bp1/Stk3/Gsdmd/B2m/Mospd2/Samhd1/Pkd1/Clybl/Mcu/Trpm2/Pkd2/Steap4/Aqp4/Kctd12/Syt1	19	GO_BP	down
GO:0051216	cartilage development	17/871	223/28891	0.000462792	0.00413433	0.00268098	Hif1a/Smad1/Chst11/Ext1/Bmpr2/Mapk14/Ep300/Trps1/Gli3/Prkca/Ccn1/Pkd1/Pkdcc/Csgalnact1/Zeb1/Gli2/Zbtb16	17	GO_BP	down
GO:0050773	regulation of dendrite development	13/871	145/28891	0.000463654	0.00413497	0.0026814	Nedd4/Iqgap1/Rapgef2/Tiam1/Ywhah/Pias2/Mfn1/Camk2b/Ptprz1/Robo1/Pak3/Grip1/Ptn	13	GO_BP	down
GO:0007613	memory	14/871	164/28891	0.000469249	0.00417775	0.00270914	Ntan1/Crebbp/Cic/Cpeb3/Large1/Pde4d/Fgf13/Apoe/Itga3/Cyp7b1/Serpinf1/Ldlr/Ptn/Camk4	14	GO_BP	down
GO:0045136	development of secondary sexual characteristics	4/871	13/28891	0.000471863	0.00418876	0.00271629	Med1/Stat5b/Stat5a/Nell2	4	GO_BP	down
GO:0048534	hematopoietic or lymphoid organ development	12/871	127/28891	0.000472086	0.00418876	0.00271629	Braf/Jarid2/Nfkb2/Tox/Stat5b/Pdpn/Atm/Samd9l/Flvcr1/Stat5a/Aire/Lrrc17	12	GO_BP	down
GO:0042987	amyloid precursor protein catabolic process	8/871	61/28891	0.000473632	0.00419537	0.00272057	Dyrk1a/Ranbp9/Flot2/Abcg1/Ifngr1/Apoe/Adam19/Slc2a13	8	GO_BP	down
GO:0044319	wound healing, spreading of cells	6/871	34/28891	0.000482054	0.00425557	0.00275961	Flna/Pdpn/Ajuba/Cd44/Ccn1/Phldb2	6	GO_BP	down
GO:0090505	epiboly involved in wound healing	6/871	34/28891	0.000482054	0.00425557	0.00275961	Flna/Pdpn/Ajuba/Cd44/Ccn1/Phldb2	6	GO_BP	down
GO:0001959	regulation of cytokine-mediated signaling pathway	13/871	146/28891	0.000495215	0.00435706	0.00282542	Hif1a/Med1/Cpne1/Prkn/Stat2/Il6st/Adar/Irf7/Trim56/Samhd1/Zbp1/Robo1/Angpt1	13	GO_BP	down
GO:0036294	cellular response to decreased oxygen levels	13/871	146/28891	0.000495215	0.00435706	0.00282542	Hif1a/Stat3/Ep300/Bnip3/Prkce/Cpeb1/Ajuba/Pdk3/Rora/Kcnk2/Stox1/Zfp36l1/Egln3	13	GO_BP	down
GO:0002456	T cell mediated immunity	14/871	165/28891	0.000498836	0.00437422	0.00283655	H2-D1/H2-K1/H2-T22/Cyrib/B2m/Serpinb9/H2-Q4/H2-M3/Il20rb/H2-Q7/Aire/H2-Q6/H2-Q2/H2-M2	14	GO_BP	down
GO:1900180	regulation of protein localization to nucleus	14/871	165/28891	0.000498836	0.00437422	0.00283655	Otud7b/Crebbp/Mapk14/Flna/Ep300/Nf2/Ptpn22/Pik3r1/Gli3/Prkcq/Mfhas1/Prkd1/Dclk1/Angpt1	14	GO_BP	down
GO:0001952	regulation of cell-matrix adhesion	12/871	128/28891	0.000506911	0.00442858	0.0028718	Rin2/Iqgap1/Pik3r1/Ptprj/Peak1/Ptpra/Efna5/Wdpcp/Phldb2/Fut1/Pcsk5/Sema3e	12	GO_BP	down
GO:2000278	regulation of DNA biosynthetic process	12/871	128/28891	0.000506911	0.00442858	0.0028718	Cct4/Bmpr2/Map3k4/Atm/Atr/Tfdp1/Naf1/Prkcq/Polg2/Kcnk2/Pak3/Cyp1b1	12	GO_BP	down
GO:0042982	amyloid precursor protein metabolic process	9/871	77/28891	0.000509265	0.00442858	0.0028718	Dyrk1a/Ranbp9/Flot2/Aatf/Abcg1/Ifngr1/Apoe/Adam19/Slc2a13	9	GO_BP	down
GO:0046847	filopodium assembly	9/871	77/28891	0.000509265	0.00442858	0.0028718	Fnbp1l/Pik3r1/Itgb4/Itga6/Fgd4/Prkcq/Trpm2/Nlgn1/Dpysl3	9	GO_BP	down
GO:2000573	positive regulation of DNA biosynthetic process	9/871	77/28891	0.000509265	0.00442858	0.0028718	Cct4/Map3k4/Atm/Atr/Naf1/Prkcq/Polg2/Pak3/Cyp1b1	9	GO_BP	down
GO:0070588	calcium ion transmembrane transport	23/871	354/28891	0.000519178	0.00450729	0.00292284	Ubr3/Fbxo11/Oga/Flna/Plcb4/Ahnak/Ptpn22/Prkce/Pde4d/Fgf14/Ccl19/Gem/Pkd1/Mcu/Trpm2/Pkd2/Plce1/Tspoap1/Slc24a3/Myo5a/Prkd1/Adra1a/Slc8a1	23	GO_BP	down
GO:0044790	suppression of viral release by host	5/871	23/28891	0.000527053	0.0045602	0.00295715	Trim12c/Trim25/Trim12a/Trim56/Trim30a	5	GO_BP	down
GO:0060253	negative regulation of glial cell proliferation	5/871	23/28891	0.000527053	0.0045602	0.00295715	Nf2/Cysltr2/Ski/Tspo/Ptn	5	GO_BP	down
GO:0051592	response to calcium ion	13/871	147/28891	0.000528576	0.0045602	0.00295715	Cpne3/Iqgap1/Braf/Cpne1/Ep300/Egfr/Kcnma1/Trpm2/Pkd2/Nlgn1/Alox15/Pcdh15/Syt1	13	GO_BP	down
GO:0002011	morphogenesis of an epithelial sheet	8/871	62/28891	0.000529628	0.0045602	0.00295715	Notch2/Flna/Pdpn/Sos1/Ajuba/Cd44/Ccn1/Phldb2	8	GO_BP	down
GO:0030166	proteoglycan biosynthetic process	8/871	62/28891	0.000529628	0.0045602	0.00295715	Chst11/Ext1/Xylt1/Extl1/Hs3st3a1/Csgalnact1/Chsy3/Hs3st4	8	GO_BP	down
GO:0003279	cardiac septum development	12/871	129/28891	0.000543873	0.00465224	0.00301684	Luzp1/Notch2/Bmpr2/Tgfbr3/Sav1/Ccn1/Adamts6/Robo1/Fzd2/Pcsk5/Robo2/Zfpm2	12	GO_BP	down
GO:0035249	synaptic transmission, glutamatergic	12/871	129/28891	0.000543873	0.00465224	0.00301684	Slc38a2/Nr3c1/Ext1/Zzef1/Prkn/Egfr/Gria3/Plppr4/Ophn1/Nlgn1/Myo5a/Syt1	12	GO_BP	down
GO:0048565	digestive tract development	12/871	129/28891	0.000543873	0.00465224	0.00301684	Hif1a/Ext1/Trp63/Sav1/Il6st/Gli3/Egfr/Ascl1/Sfrp1/Pkdcc/Gli2/Pcsk5	12	GO_BP	down
GO:0048640	negative regulation of developmental growth	12/871	129/28891	0.000543873	0.00465224	0.00301684	Ttc3/Atxn2/Jarid2/Wwc1/Stk3/Sav1/Fgf13/Wwc2/Kcnk2/Epha7/Sema3a/Sema3e	12	GO_BP	down
GO:0048488	synaptic vesicle endocytosis	9/871	78/28891	0.000560534	0.00478695	0.00310419	Fcho2/Prkn/Dennd1a/Synj2/Bcl2l1/Grn/Ophn1/Nlgn1/Syt1	9	GO_BP	down
GO:0006937	regulation of muscle contraction	14/871	167/28891	0.000562795	0.00479843	0.00311163	Hdac4/Cald1/Npnt/Prkca/Pde4d/Fgf13/Kcnma1/Dsg2/Calcrl/Prkd1/Irag1/Dock4/Adra1a/Slc8a1	14	GO_BP	down
GO:0043123	positive regulation of canonical NF-kappaB signal transduction	13/871	148/28891	0.000563818	0.00479933	0.00311222	Ankrd17/Brd4/Trim12c/Prkn/Trim25/Traf5/Trim12a/Prkce/Ajuba/Ccl19/Trim30a/Eda/Prkd1	13	GO_BP	down
GO:0002285	lymphocyte activation involved in immune response	17/871	227/28891	0.000566601	0.00481152	0.00312013	Stat3/Notch2/Lgals9/Ap1g1/Rif1/Lgals8/Trp53bp1/Gadd45g/Nbn/H2-M3/Ccl19/Rora/Plcl2/Swap70/H2-DMb2/Lgals1/Dock10	17	GO_BP	down
GO:0090504	epiboly	6/871	35/28891	0.000567089	0.00481152	0.00312013	Flna/Pdpn/Ajuba/Cd44/Ccn1/Phldb2	6	GO_BP	down
GO:0051170	import into nucleus	15/871	187/28891	0.000578066	0.00488882	0.00317025	Stat3/Med1/Mapk14/Flna/Ep300/Tnpo1/Stk3/Ptpn22/Pik3r1/Adar/Gli3/Ipo11/Prkcq/Prkd1/Angpt1	15	GO_BP	down
GO:0071248	cellular response to metal ion	15/871	187/28891	0.000578066	0.00488882	0.00317025	Ank3/Cpne3/Iqgap1/Braf/Cpne1/Bnip3/B2m/Mt1/Egfr/Mt2/Trpm2/Pkd2/Nlgn1/Alox15/Syt1	15	GO_BP	down
GO:0060395	SMAD protein signal transduction	10/871	95/28891	0.000590013	0.00498092	0.00322998	Smad1/Bmpr2/Lgals9/Lnpep/Hipk2/Ski/Ldlrad4/Magi2/Ucma/Vim	10	GO_BP	down
GO:0045912	negative regulation of carbohydrate metabolic process	8/871	63/28891	0.00059086	0.00498092	0.00322998	Ncor1/Stat3/Ep300/Prkn/Hdac4/Sik2/Cbfa2t3/Grb10	8	GO_BP	down
GO:0045598	regulation of fat cell differentiation	13/871	149/28891	0.000601025	0.00505847	0.00328026	Mapk14/Ncor2/Stk3/Sav1/Rora/Sfrp1/Zfp36l2/Tgfb1i1/Fbn1/Zfp36l1/Lpl/Zbtb16/Zfpm2	13	GO_BP	down
GO:0050714	positive regulation of protein secretion	15/871	188/28891	0.000611083	0.00512664	0.00332447	Gnaq/Hif1a/Oga/Rab34/Ep300/Prkn/Abcg1/Prkce/Myo18a/Egfr/Gpr27/Prkcq/Ang/Mcu/Trpm2	15	GO_BP	down
GO:0060041	retina development in camera-type eye	15/871	188/28891	0.000611083	0.00512664	0.00332447	Nectin1/Hif1a/Stat3/Col4a1/Bmpr2/Med1/Hipk2/Large1/Ski/Grn/Ttll5/Arl6/Ptn/Cyp1b1/C3	15	GO_BP	down
GO:0002764	immune response-regulating signaling pathway	27/871	450/28891	0.000614755	0.00514919	0.00333909	Stmp1/Ap3b1/Znrf1/Braf/Rigi/Ankrd17/Cd47/Trim25/Ptpn22/Pik3r1/Ptprj/Irf7/Prkce/Sos1/Pde4d/Mapkapk3/Il20rb/Rps6ka3/Dhx58/Cblb/Skint10/Plcl2/Mfhas1/Trim30a/Ddx60/Prkd1/Plscr2	27	GO_BP	down
GO:0002040	sprouting angiogenesis	12/871	131/28891	0.000624617	0.00521511	0.00338184	Hif1a/Smad1/Map3k3/Vegfb/Rnf213/Tspan18/Akt3/Robo1/Fut1/Hdac9/Angpt1/Sema3e	12	GO_BP	down
GO:0035710	CD4-positive, alpha-beta T cell activation	12/871	131/28891	0.000624617	0.00521511	0.00338184	Ncor1/Stat3/Braf/Tox/Lgals9/Itch/Gadd45g/Cd44/Ccl19/Prkcq/Rora/Cblb	12	GO_BP	down
GO:0002263	cell activation involved in immune response	22/871	337/28891	0.00063817	0.00531914	0.0034493	Stat3/Notch2/Bcr/Gbf1/Lgals9/Ap1g1/Rif1/Lgals8/Trp53bp1/Prkce/Gadd45g/Grn/Nbn/H2-M3/Ccl19/Rora/Plcl2/Swap70/H2-DMb2/Lgals1/Dock10/Grp	22	GO_BP	down
GO:0090316	positive regulation of intracellular protein transport	13/871	150/28891	0.000640283	0.00531914	0.0034493	Ank3/Mapk14/Flna/Ep300/Ptpn22/Pik3r1/Edem1/Gli3/Prkcq/Tcaf2/Prkd1/Wipf1/Camk4	13	GO_BP	down
GO:0034644	cellular response to UV	10/871	96/28891	0.000641142	0.00531914	0.0034493	Nedd4/Crebbp/N4bp1/Mapk14/Ep300/Ddb1/Pik3r1/Atr/Ptprk/Crip1	10	GO_BP	down
GO:0043535	regulation of blood vessel endothelial cell migration	10/871	96/28891	0.000641142	0.00531914	0.0034493	Hif1a/Map3k3/Map2k3/Prkca/Stat5a/Apoe/Akt3/Hdac9/Prkd1/Angpt1	10	GO_BP	down
GO:0021514	ventral spinal cord interneuron differentiation	4/871	14/28891	0.000644892	0.00533335	0.00345851	Gli3/Ascl1/Gli2/Dmrt3	4	GO_BP	down
GO:0045906	negative regulation of vasoconstriction	4/871	14/28891	0.000644892	0.00533335	0.00345851	Hif1a/Bmpr2/Adm/Dock4	4	GO_BP	down
GO:0036303	lymph vessel morphogenesis	5/871	24/28891	0.000649339	0.00535321	0.00347139	Bmpr2/Ptpn14/Lgals8/Pdpn/Pkd1	5	GO_BP	down
GO:2001224	positive regulation of neuron migration	5/871	24/28891	0.000649339	0.00535321	0.00347139	Rapgef2/Flna/Arhgap32/Ptprz1/Sema3a	5	GO_BP	down
GO:0043616	keratinocyte proliferation	8/871	64/28891	0.000657684	0.00541349	0.00351048	Notch2/Med1/Trp63/Stxbp4/Ptprk/Zfp36l1/Zeb1/Prkd1	8	GO_BP	down
GO:0048259	regulation of receptor-mediated endocytosis	12/871	132/28891	0.000668616	0.00549482	0.00356323	Nedd4/Atxn2/Cd63/Lpar1/Tbc1d5/B2m/Prkca/Ccl19/Ophn1/Magi2/Angpt1/C3	12	GO_BP	down
GO:0042306	regulation of protein import into nucleus	9/871	80/28891	0.000675772	0.00553625	0.00359009	Mapk14/Flna/Ep300/Ptpn22/Pik3r1/Gli3/Prkcq/Prkd1/Angpt1	9	GO_BP	down
GO:0060976	coronary vasculature development	9/871	80/28891	0.000675772	0.00553625	0.00359009	Dync2h1/Tgfbr3/Vegfb/Adamts6/Robo1/Gpc3/Angpt1/Pcsk5/Zfpm2	9	GO_BP	down
GO:0007411	axon guidance	18/871	252/28891	0.000690931	0.00564278	0.00365917	Nectin1/Ank3/Ablim1/Ext1/Mycbp2/Bmpr2/Alcam/Cdh4/Gli3/Efna5/Unc5c/Plxna2/Epha7/Robo1/Sema3a/Gli2/Robo2/Sema3e	18	GO_BP	down
GO:0097485	neuron projection guidance	18/871	252/28891	0.000690931	0.00564278	0.00365917	Nectin1/Ank3/Ablim1/Ext1/Mycbp2/Bmpr2/Alcam/Cdh4/Gli3/Efna5/Unc5c/Plxna2/Epha7/Robo1/Sema3a/Gli2/Robo2/Sema3e	18	GO_BP	down
GO:0043491	phosphatidylinositol 3-kinase/protein kinase B signal transduction	21/871	317/28891	0.000695346	0.00566999	0.00367682	Ncor1/Nedd4/Stat3/Cpne1/Ep300/Stk3/Pik3r1/Ptprj/Egfr/Vegfb/Ccl19/Igf1r/Setx/Mfhas1/Stox1/Xdh/Zfp36l1/Magi2/Angpt1/Sema3e/Myo16	21	GO_BP	down
GO:0043547	positive regulation of GTPase activity	18/871	253/28891	0.000723434	0.00586844	0.00380551	Pkp4/Bcr/Ralgapa1/Rapgef2/Asap1/Ralgapb/Ralgapa2/Tiam1/Tbc1d5/Dennd1a/Sos1/Itga6/Tbc1d2b/Ccl19/Dock9/Tbc1d12/Dock10/Rgl1	18	GO_BP	down
GO:0097529	myeloid leukocyte migration	18/871	253/28891	0.000723434	0.00586844	0.00380551	Bcr/Gbf1/Cd47/Pikfyve/Stat5b/Pik3r1/Cnn2/Ptprj/Prkca/Mospd2/Pde4d/Vegfb/Ccl19/Mmp28/Mcu/Cd99l2/Swap70/Itga1	18	GO_BP	down
GO:0006022	aminoglycan metabolic process	11/871	115/28891	0.000724167	0.00586844	0.00380551	Chst11/Ext1/Ccnd3/Gns/Cd44/Xylt1/Hs3st3a1/Csgalnact1/Abcc5/Angpt1/Chsy3	11	GO_BP	down
GO:0034766	negative regulation of monoatomic ion transmembrane transport	11/871	115/28891	0.000724167	0.00586844	0.00380551	Nedd4/Ank3/Ubr3/Fbxo11/Prkce/Prkca/Gem/Pkd2/Tcaf2/Grip1/Grp	11	GO_BP	down
GO:0060760	positive regulation of response to cytokine stimulus	8/871	65/28891	0.000730469	0.00591036	0.00383269	Hif1a/Rigi/Med1/Cpne1/Prkn/Irf7/Trim56/Zbp1	8	GO_BP	down
GO:0140238	presynaptic endocytosis	9/871	81/28891	0.000740249	0.00598025	0.00387801	Fcho2/Prkn/Dennd1a/Synj2/Bcl2l1/Grn/Ophn1/Nlgn1/Syt1	9	GO_BP	down
GO:0007405	neuroblast proliferation	10/871	98/28891	0.000754397	0.0060758	0.00393997	Hif1a/Notch2/Kifap3/Zzef1/Gli3/Nbn/Fgf13/Ascl1/Hhip/Ptn	10	GO_BP	down
GO:0021954	central nervous system neuron development	10/871	98/28891	0.000754397	0.0060758	0.00393997	Gnaq/Mycbp2/Rapgef2/Prkca/Ascl1/Cdh11/Dclk1/Sema3a/Gli2/Sema3e	10	GO_BP	down
GO:0002221	pattern recognition receptor signaling pathway	17/871	233/28891	0.00075957	0.00609283	0.00395101	Stmp1/Ap3b1/Znrf1/Rigi/Ankrd17/Trim25/Ptpn22/Pik3r1/Irf7/Prkce/Mapkapk3/Rps6ka3/Dhx58/Mfhas1/Trim30a/Ddx60/Prkd1	17	GO_BP	down
GO:1902806	regulation of cell cycle G1/S phase transition	15/871	192/28891	0.000759699	0.00609283	0.00395101	Kmt2e/Arid1b/Crebbp/Ankrd17/Smarcc2/Trp63/Ube2e2/Bcl7a/Stxbp4/Pdpn/Egfr/Pkd1/Pkd2/Stox1/Myo16	15	GO_BP	down
GO:0009314	response to radiation	26/871	433/28891	0.000760004	0.00609283	0.00395101	Nedd4/Hif1a/Ext1/Fbxl17/Braf/Tank/Crebbp/N4bp1/Mapk14/Zzef1/Ep300/Rev1/Map3k4/Ddb1/Pik3r1/Bcl2l1/Atm/Wrn/Atr/Large1/Egfr/Ptprk/Crip1/Sfrp1/Spidr/Map4k3	26	GO_BP	down
GO:0060048	cardiac muscle contraction	12/871	134/28891	0.000764427	0.00611892	0.00396793	Flna/Gaa/Hdac4/Map2k3/Pde4d/Fgf13/Vegfb/Dsg2/Map2k6/Myl1/Adra1a/Slc8a1	12	GO_BP	down
GO:0033687	osteoblast proliferation	6/871	37/28891	0.000771727	0.00614915	0.00398754	Kcnq1ot1/Nf2/Fbln5/Ccn1/Igf1r/Sfrp1	6	GO_BP	down
GO:1903421	regulation of synaptic vesicle recycling	6/871	37/28891	0.000771727	0.00614915	0.00398754	Prkn/Bcl2l1/Pclo/Fgf14/Ophn1/Nlgn1	6	GO_BP	down
GO:1904358	positive regulation of telomere maintenance via telomere lengthening	6/871	37/28891	0.000771727	0.00614915	0.00398754	Cct4/Map3k4/Atm/Atr/Naf1/Prkcq	6	GO_BP	down
GO:0042593	glucose homeostasis	20/871	298/28891	0.000785519	0.00624953	0.00405263	Hif1a/Stat3/Mbd5/Ncor2/Rab34/Zbtb20/Prkn/Abcg1/Pik3r1/Tiam1/Ptprj/Stxbp4/Prkce/Pdk3/Gpr27/Igf1r/Efna5/Mcu/Fbn1/Aqp4	20	GO_BP	down
GO:0002495	antigen processing and presentation of peptide antigen via MHC class II	5/871	25/28891	0.00079168	0.0062662	0.00406344	Pikfyve/B2m/H2-Oa/H2-DMb2/H2-Eb2	5	GO_BP	down
GO:0060216	definitive hemopoiesis	5/871	25/28891	0.00079168	0.0062662	0.00406344	Ncor1/Bcr/Tgfbr3/Adar/Zfp36l2	5	GO_BP	down
GO:1904031	positive regulation of cyclin-dependent protein kinase activity	5/871	25/28891	0.00079168	0.0062662	0.00406344	Ccnd3/Egfr/Pkd1/Pkd2/Stox1	5	GO_BP	down
GO:0032535	regulation of cellular component size	25/871	411/28891	0.000792402	0.0062662	0.00406344	Ttc3/Bmpr2/Cyrib/Tmsb10/Ep300/Prkce/Cdh4/Flii/Arhgap32/Pclo/Fgf13/Kcnma1/Shroom2/Efna5/Apoe/Lmod1/Akt3/Epha7/Swap70/Pak3/Alox15/Prkd1/Aqp4/Sema3a/Sema3e	25	GO_BP	down
GO:0000266	mitochondrial fission	7/871	51/28891	0.000805584	0.00636083	0.0041248	Ap3b1/Cyrib/Prkn/Stat2/Bnip3/Mfn1/Mcu	7	GO_BP	down
GO:0019098	reproductive behavior	8/871	66/28891	0.000809596	0.00638288	0.0041391	Gnaq/Nr3c1/Ncoa2/Mbd2/Hdac4/Grn/Ar/Npas3	8	GO_BP	down
GO:0010927	cellular component assembly involved in morphogenesis	12/871	135/28891	0.000816475	0.00642744	0.004168	Pikfyve/Ep300/Vps13b/Plec/Itgb4/Flii/Fig4/Myl9/Pmp22/Lmod1/Phldb2/Prkd1	12	GO_BP	down
GO:0033500	carbohydrate homeostasis	20/871	299/28891	0.000818627	0.0064347	0.00417271	Hif1a/Stat3/Mbd5/Ncor2/Rab34/Zbtb20/Prkn/Abcg1/Pik3r1/Tiam1/Ptprj/Stxbp4/Prkce/Pdk3/Gpr27/Igf1r/Efna5/Mcu/Fbn1/Aqp4	20	GO_BP	down
GO:0006979	response to oxidative stress	24/871	389/28891	0.000822065	0.00645204	0.00418395	Usp25/Hif1a/Pnpla8/Ep300/Prkn/Trim25/Bnip3/Atm/Wrn/Abcc1/Fbln5/Egfr/Ptprk/Prkca/Gstp1/Setx/Msrb3/Trpm2/Apoe/Stox1/Prkd1/Cyp1b1/Slc8a1/Gpx3	24	GO_BP	down
GO:0030705	cytoskeleton-dependent intracellular transport	16/871	214/28891	0.000827247	0.0064733	0.00419773	Hook3/Ank3/Hif1a/Ap3b1/Dync2h1/Hook2/Fnbp1l/Flot2/Myo1e/Dync2li1/Ccdc88a/Wdpcp/Arhgap21/Trak2/Myo5a/Dync1i1	16	GO_BP	down
GO:0031334	positive regulation of protein-containing complex assembly	16/871	214/28891	0.000827247	0.0064733	0.00419773	Stmp1/Cdk5rap2/Pde4dip/Ptpn22/Fnip1/Prkce/Atm/Atr/Ajuba/Abca1/Togaram1/Lmod1/Spidr/Alox15/Prkd1/Pcsk5	16	GO_BP	down
GO:1903034	regulation of response to wounding	14/871	174/28891	0.000844299	0.00659687	0.00427787	Hif1a/Stat3/Braf/Flna/Kremen1/Prkce/Grn/Vegfb/Igf1r/Pros1/Xylt1/Apoe/Phldb2/Ptn	14	GO_BP	down
GO:0030206	chondroitin sulfate biosynthetic process	4/871	15/28891	0.000858499	0.00668786	0.00433687	Chst11/Xylt1/Csgalnact1/Chsy3	4	GO_BP	down
GO:0060742	epithelial cell differentiation involved in prostate gland development	4/871	15/28891	0.000858499	0.00668786	0.00433687	Trp63/Fem1b/Stat5a/Ar	4	GO_BP	down
GO:0002262	myeloid cell homeostasis	16/871	215/28891	0.000869371	0.00676249	0.00438527	Ncor1/Kmt2e/Hif1a/Stat3/Med1/Mapk14/Stat5b/Tgfbr3/Adar/B2m/Cd44/Flvcr1/Cdin1/Stat5a/Mfhas1/Zfp36l1	16	GO_BP	down
GO:0022618	protein-RNA complex assembly	14/871	175/28891	0.000892851	0.00691789	0.00448604	Snrpg/Cpsf6/Rps27/Mbnl1/Celf2/Srpk1/Prpf39/Adar/Atm/Atr/Prpf8/Naf1/Setx/Eif2s3y	14	GO_BP	down
GO:0071364	cellular response to epidermal growth factor stimulus	6/871	38/28891	0.000893313	0.00691789	0.00448604	Iqgap1/Med1/Stat5b/Egfr/Zfp36l2/Zfp36l1	6	GO_BP	down
GO:0090140	regulation of mitochondrial fission	6/871	38/28891	0.000893313	0.00691789	0.00448604	Cyrib/Prkn/Stat2/Bnip3/Mfn1/Mcu	6	GO_BP	down
GO:0001892	embryonic placenta development	11/871	118/28891	0.00089791	0.00694322	0.00450247	Hif1a/Med1/Bptf/Stk3/Egfr/Ccn1/Pkd1/Adm/Pkd2/Zfp36l1/Slc8a1	11	GO_BP	down
GO:0048009	insulin-like growth factor receptor signaling pathway	7/871	52/28891	0.000907006	0.00700321	0.00454137	Pik3r1/Sos1/Ar/Igf1r/Ghr/Igfbp2/Grb10	7	GO_BP	down
GO:0045927	positive regulation of growth	21/871	324/28891	0.00091784	0.00707643	0.00458885	Nr3c1/Bmpr2/Mapk14/Stat5b/Ep300/Prkn/Tead1/Tgfbr3/Cxcl16/Cdh4/Arhgap32/Egfr/Stat5a/Igf1r/Efna5/Sfrp1/Apoe/Ghr/Syt1/Zfpm2/C3	21	GO_BP	down
GO:0006090	pyruvate metabolic process	12/871	137/28891	0.000929472	0.00713458	0.00462656	Ncor1/Hif1a/Stat3/Tpi1/Zbtb20/Ep300/Hdac4/Pdk3/Prkag2/Sik2/Pdha1/Cbfa2t3	12	GO_BP	down
GO:0007030	Golgi organization	12/871	137/28891	0.000929472	0.00713458	0.00462656	Vti1a/Gbf1/Dync2h1/Cog5/Pde4dip/Vps13b/Myo18a/Armh3/Arhgap21/Syne1/Rab30/Prkd1	12	GO_BP	down
GO:2000177	regulation of neural precursor cell proliferation	12/871	137/28891	0.000929472	0.00713458	0.00462656	Hif1a/Notch2/Kifap3/Tox/Flna/Nf2/Gli3/Ascl1/Ptprz1/Smarca1/Ptn/Gli2	12	GO_BP	down
GO:0001678	intracellular glucose homeostasis	14/871	176/28891	0.000943735	0.00723346	0.00469068	Hif1a/Rab34/Zbtb20/Prkn/Abcg1/Pik3r1/Tiam1/Stxbp4/Prkce/Pdk3/Gpr27/Igf1r/Efna5/Aqp4	14	GO_BP	down
GO:0030204	chondroitin sulfate metabolic process	5/871	26/28891	0.000956049	0.00727459	0.00471735	Chst11/Ext1/Xylt1/Csgalnact1/Chsy3	5	GO_BP	down
GO:1900151	regulation of nuclear-transcribed mRNA catabolic process, deadenylation-dependent decay	5/871	26/28891	0.000956049	0.00727459	0.00471735	Pabpc1/Tnrc6b/Cpeb3/Zfp36l2/Zfp36l1	5	GO_BP	down
GO:1902993	positive regulation of amyloid precursor protein catabolic process	5/871	26/28891	0.000956049	0.00727459	0.00471735	Ranbp9/Abcg1/Ifngr1/Apoe/Slc2a13	5	GO_BP	down
GO:1904353	regulation of telomere capping	5/871	26/28891	0.000956049	0.00727459	0.00471735	Map3k4/Atm/Rad50/Nbn/Prkcq	5	GO_BP	down
GO:2000561	regulation of CD4-positive, alpha-beta T cell proliferation	5/871	26/28891	0.000956049	0.00727459	0.00471735	Lgals9/Itch/Cd44/Prkcq/Cblb	5	GO_BP	down
GO:0002757	immune response-activating signaling pathway	26/871	440/28891	0.000958427	0.0072821	0.00472222	Stmp1/Ap3b1/Znrf1/Braf/Rigi/Ankrd17/Cd47/Trim25/Ptpn22/Pik3r1/Ptprj/Irf7/Prkce/Sos1/Pde4d/Mapkapk3/Rps6ka3/Dhx58/Cblb/Skint10/Plcl2/Mfhas1/Trim30a/Ddx60/Prkd1/Plscr2	26	GO_BP	down
GO:0006605	protein targeting	20/871	303/28891	0.000963353	0.00730586	0.00473763	Nedd4/Ank3/Pan3/Ap3b1/Exoc4/Snx16/Oga/Pikfyve/Vps13a/Nbea/Stxbp4/Edem1/Vps41/Large1/Agk/Trim37/Trak2/Tcaf2/Nlgn1/Man1a	20	GO_BP	down
GO:0140888	interferon-mediated signaling pathway	9/871	84/28891	0.000964345	0.00730586	0.00473763	Med1/Stat2/Adar/Irf7/Hdac4/Trim56/Samhd1/Ifngr1/Zbp1	9	GO_BP	down
GO:0043271	negative regulation of monoatomic ion transport	13/871	157/28891	0.000980315	0.00740541	0.00480218	Gnaq/Nedd4/Ank3/Ubr3/Fbxo11/Plcb4/Prkce/Prkca/Gem/Pkd2/Tcaf2/Grip1/Grp	13	GO_BP	down
GO:0048593	camera-type eye morphogenesis	13/871	157/28891	0.000980315	0.00740541	0.00480218	Nectin1/Hif1a/Stat3/Notch2/Hipk2/Tenm3/Gli3/Large1/Ski/Arl6/Shroom2/Zeb1/Ptn	13	GO_BP	down
GO:0051099	positive regulation of binding	15/871	197/28891	0.000987621	0.00744985	0.004831	Mbd2/Brd4/Rapgef2/Ep300/Prkn/Stk3/Krit1/Tiam1/Hipk2/B2m/Cald1/Ski/Pkd1/Plcl2/Apoe	15	GO_BP	down
GO:0044843	cell cycle G1/S phase transition	18/871	260/28891	0.000989885	0.00745142	0.00483202	Kmt2e/Arid1b/Crebbp/Ankrd17/Brd4/Smarcc2/Ccnd3/Trp63/Ube2e2/Bcl7a/Stxbp4/Pdpn/Egfr/Pkd1/Camk2b/Pkd2/Stox1/Myo16	18	GO_BP	down
GO:0007266	Rho protein signal transduction	12/871	138/28891	0.000990676	0.00745142	0.00483202	Arhgef12/Bcr/Arhgef11/Lpar1/Pdpn/Arhgap32/Abca1/Ophn1/Apoe/Itga3/Robo1/Adra1a	12	GO_BP	down
GO:0060047	heart contraction	17/871	239/28891	0.00100615	0.00755695	0.00490045	Ext1/Flna/Pik3r1/Gaa/Hdac4/Map2k3/Prkca/Pde4d/Fgf13/Vegfb/Adm/Dsg2/Map2k6/Sema3a/Myl1/Adra1a/Slc8a1	17	GO_BP	down
GO:0060412	ventricular septum morphogenesis	7/871	53/28891	0.00101822	0.00762575	0.00494506	Bmpr2/Tgfbr3/Sav1/Robo1/Fzd2/Robo2/Zfpm2	7	GO_BP	down
GO:1902895	positive regulation of miRNA transcription	7/871	53/28891	0.00101822	0.00762575	0.00494506	Hif1a/Stat3/Smad1/Nr3c1/Tead1/Egfr/Ar	7	GO_BP	down
GO:1903076	regulation of protein localization to plasma membrane	11/871	120/28891	0.00103187	0.00771692	0.00500418	Stx8/Pik3r1/Bcl2l1/Egfr/Ar/Camk2b/Itga3/Pkdcc/Grip1/Myo5a/Lypd1	11	GO_BP	down
GO:0002444	myeloid leukocyte mediated immunity	13/871	158/28891	0.0010394	0.00775111	0.00502635	Kmt2e/H2-D1/H2-K1/Bcr/H2-T22/Rigi/H2-Q4/H2-Q7/Grp/H2-Q6/H2-Q2/H2-M2/C3	13	GO_BP	down
GO:0071333	cellular response to glucose stimulus	13/871	158/28891	0.0010394	0.00775111	0.00502635	Hif1a/Rab34/Zbtb20/Prkn/Abcg1/Tiam1/Stxbp4/Prkce/Pdk3/Gpr27/Igf1r/Efna5/Aqp4	13	GO_BP	down
GO:0060411	cardiac septum morphogenesis	9/871	85/28891	0.00105022	0.00779872	0.00505723	Notch2/Bmpr2/Tgfbr3/Sav1/Ccn1/Robo1/Fzd2/Robo2/Zfpm2	9	GO_BP	down
GO:0006941	striated muscle contraction	14/871	178/28891	0.00105285	0.00779872	0.00505723	Flna/Gaa/Hdac4/Map2k3/Large1/Pde4d/Fgf13/Vegfb/Dsg2/Map2k6/Prkd1/Myl1/Adra1a/Slc8a1	14	GO_BP	down
GO:1901875	positive regulation of post-translational protein modification	14/871	178/28891	0.00105285	0.00779872	0.00505723	Auts2/Dek/Tank/Mycbp2/Btrc/Ep300/Prkn/Ptpn22/Kansl1/Birc2/Hdac4/Cblb/Rnf180/Angpt1	14	GO_BP	down
GO:0009952	anterior/posterior pattern specification	17/871	240/28891	0.00105324	0.00779872	0.00505723	Bmpr2/Pds5a/Bptf/Ep300/Scmh1/Tshz1/Hipk2/Hes6/Atm/Gli3/Ski/Sfrp1/Plxna2/Gpc3/Gli2/Zbtb16/Pcsk5	17	GO_BP	down
GO:0030595	leukocyte chemotaxis	17/871	240/28891	0.00105324	0.00779872	0.00505723	Gbf1/Pikfyve/Cxcl16/Ptprj/Plec/Prkca/Mospd2/Pde4d/Vegfb/Ccl19/Mmp28/Mcu/Trpm2/Cyp7b1/Swap70/Ptn/Itga1	17	GO_BP	down
GO:0019932	second-messenger-mediated signaling	21/871	328/28891	0.00107063	0.00791633	0.0051335	Exoc4/Rapgef2/Hint1/Samd14/Lpar1/Ptprj/Hdac4/Mt1/Egfr/Pde4d/Mt2/Gucy1a2/Mcu/Trpm2/Apoe/Tspan18/Adcy2/Prkd1/Irag1/Gnai1/Slc8a1	21	GO_BP	down
GO:0062208	positive regulation of pattern recognition receptor signaling pathway	8/871	69/28891	0.00108905	0.00802985	0.00520711	Stmp1/Znrf1/Ankrd17/Ptpn22/Dhx58/Mfhas1/Ddx60/Prkd1	8	GO_BP	down
GO:0150116	regulation of cell-substrate junction organization	8/871	69/28891	0.00108905	0.00802985	0.00520711	Iqgap1/Pik3r1/Ptprj/Peak1/Ptpra/Efna5/Wdpcp/Phldb2	8	GO_BP	down
GO:0060840	artery development	11/871	121/28891	0.00110479	0.008123	0.00526752	Luzp1/Bmpr2/Kat6a/Gaa/Gli3/Adamts6/Apoe/Akt3/Robo1/Ldlr/Robo2	11	GO_BP	down
GO:0062014	negative regulation of small molecule metabolic process	11/871	121/28891	0.00110479	0.008123	0.00526752	Ncor1/Stat3/Dcaf5/Ep300/Isyna1/Fmo1/Hdac4/Sik2/Tspo/Apoe/Cbfa2t3	11	GO_BP	down
GO:0000041	transition metal ion transport	10/871	103/28891	0.00111106	0.00812509	0.00526887	Nectin1/Ap3b1/B2m/Abcb7/Slc39a11/Flvcr1/Trpm2/Slc30a2/Steap4/Abcc5	10	GO_BP	down
GO:0009416	response to light stimulus	21/871	329/28891	0.00111208	0.00812509	0.00526887	Nedd4/Hif1a/Ext1/Fbxl17/Braf/Crebbp/N4bp1/Mapk14/Zzef1/Ep300/Rev1/Map3k4/Ddb1/Pik3r1/Wrn/Atr/Large1/Egfr/Ptprk/Crip1/Map4k3	21	GO_BP	down
GO:0002396	MHC protein complex assembly	4/871	16/28891	0.00111749	0.00812509	0.00526887	B2m/H2-Oa/H2-DMb2/H2-Eb2	4	GO_BP	down
GO:0002501	peptide antigen assembly with MHC protein complex	4/871	16/28891	0.00111749	0.00812509	0.00526887	B2m/H2-Oa/H2-DMb2/H2-Eb2	4	GO_BP	down
GO:0033700	phospholipid efflux	4/871	16/28891	0.00111749	0.00812509	0.00526887	Abcg1/Abcc1/Abca1/Apoe	4	GO_BP	down
GO:0042921	glucocorticoid receptor signaling pathway	4/871	16/28891	0.00111749	0.00812509	0.00526887	Nedd4/Nr3c1/Ncoa2/Ywhah	4	GO_BP	down
GO:0046642	negative regulation of alpha-beta T cell proliferation	4/871	16/28891	0.00111749	0.00812509	0.00526887	Lgals9/Itch/Cd44/Cblb	4	GO_BP	down
GO:2001212	regulation of vasculogenesis	4/871	16/28891	0.00111749	0.00812509	0.00526887	Rin2/Rapgef2/Adm/Xdh	4	GO_BP	down
GO:0006816	calcium ion transport	27/871	469/28891	0.0011348	0.0082395	0.00534306	Ubr3/Fbxo11/Oga/Flna/Plcb4/Ahnak/Ptpn22/Prkce/Pde4d/Fgf14/Ccl19/Gem/Pkd1/Tspo/Camk2b/Mcu/Trpm2/Pkd2/Calcrl/Plce1/Tspan18/Tspoap1/Slc24a3/Myo5a/Prkd1/Adra1a/Slc8a1	27	GO_BP	down
GO:0043954	cellular component maintenance	9/871	86/28891	0.00114218	0.00826391	0.00535889	Cadm1/Grn/Shroom2/Igf1r/Ophn1/Apoe/Itga3/Nlgn1/Sema3a	9	GO_BP	down
GO:0002504	antigen processing and presentation of peptide or polysaccharide antigen via MHC class II	5/871	27/28891	0.00114448	0.00826391	0.00535889	Pikfyve/B2m/H2-Oa/H2-DMb2/H2-Eb2	5	GO_BP	down
GO:0035739	CD4-positive, alpha-beta T cell proliferation	5/871	27/28891	0.00114448	0.00826391	0.00535889	Lgals9/Itch/Cd44/Prkcq/Cblb	5	GO_BP	down
GO:0060765	regulation of androgen receptor signaling pathway	5/871	27/28891	0.00114448	0.00826391	0.00535889	Ncor1/Ncor2/Ep300/Pias2/Sfrp1	5	GO_BP	down
GO:0002064	epithelial cell development	17/871	242/28891	0.00115305	0.00831433	0.00539159	Hif1a/Notch2/Fndc3a/S1pr3/Rapgef2/Flna/Trp63/Plec/Il6st/Tjp2/Fem1b/Frmd6/Pde4d/Myo1e/Kcnma1/Ar/Vim	17	GO_BP	down
GO:0071331	cellular response to hexose stimulus	13/871	160/28891	0.00116653	0.00840001	0.00544715	Hif1a/Rab34/Zbtb20/Prkn/Abcg1/Tiam1/Stxbp4/Prkce/Pdk3/Gpr27/Igf1r/Efna5/Aqp4	13	GO_BP	down
GO:0033144	negative regulation of intracellular steroid hormone receptor signaling pathway	6/871	40/28891	0.00118023	0.00847535	0.005496	Ncor1/Ncor2/Trp63/Pias2/Sfrp1/Cyp7b1	6	GO_BP	down
GO:0046839	phospholipid dephosphorylation	6/871	40/28891	0.00118023	0.00847535	0.005496	Plpp3/Mtmr3/Plpp1/Synj2/Fig4/Plppr4	6	GO_BP	down
GO:0032606	type I interferon production	12/871	141/28891	0.00119473	0.00855338	0.00554661	G3bp1/Ap3b1/Tank/Crebbp/Rigi/Zbtb20/Ptpn22/Irf7/Trim56/Gbp7/Dhx58/Pola1	12	GO_BP	down
GO:0006096	glycolytic process	10/871	104/28891	0.00119672	0.00855338	0.00554661	Ncor1/Hif1a/Stat3/Tpi1/Zbtb20/Ep300/Hdac4/Prkag2/Sik2/Cbfa2t3	10	GO_BP	down
GO:0007173	epidermal growth factor receptor signaling pathway	10/871	104/28891	0.00119672	0.00855338	0.00554661	Iqgap1/Braf/Mvp/Ptprj/Sos1/Egfr/Ccdc88a/Cblb/Plce1/Itga1	10	GO_BP	down
GO:0032206	positive regulation of telomere maintenance	8/871	70/28891	0.00119764	0.00855338	0.00554661	Cct4/Map3k4/Atm/Atr/Rad50/Nbn/Naf1/Prkcq	8	GO_BP	down
GO:0071326	cellular response to monosaccharide stimulus	13/871	161/28891	0.00123481	0.00880683	0.00571096	Hif1a/Rab34/Zbtb20/Prkn/Abcg1/Tiam1/Stxbp4/Prkce/Pdk3/Gpr27/Igf1r/Efna5/Aqp4	13	GO_BP	down
GO:0002758	innate immune response-activating signaling pathway	17/871	244/28891	0.00126077	0.00897402	0.00581937	Stmp1/Ap3b1/Znrf1/Rigi/Ankrd17/Trim25/Ptpn22/Pik3r1/Irf7/Prkce/Mapkapk3/Rps6ka3/Dhx58/Mfhas1/Trim30a/Ddx60/Prkd1	17	GO_BP	down
GO:0002062	chondrocyte differentiation	11/871	123/28891	0.00126339	0.00897402	0.00581937	Hif1a/Chst11/Ext1/Bmpr2/Mapk14/Trps1/Gli3/Prkca/Pkdcc/Gli2/Zbtb16	11	GO_BP	down
GO:0019218	regulation of steroid metabolic process	11/871	123/28891	0.00126339	0.00897402	0.00581937	Nr3c1/Stat5b/Abcg1/Scap/Stat5a/Kcnma1/Tspo/Igf1r/Rora/Apoe/Ldlr	11	GO_BP	down
GO:0002366	leukocyte activation involved in immune response	21/871	333/28891	0.00129192	0.00916421	0.00594271	Stat3/Notch2/Bcr/Lgals9/Ap1g1/Rif1/Lgals8/Trp53bp1/Prkce/Gadd45g/Grn/Nbn/H2-M3/Ccl19/Rora/Plcl2/Swap70/H2-DMb2/Lgals1/Dock10/Grp	21	GO_BP	down
GO:0071453	cellular response to oxygen levels	13/871	162/28891	0.00130637	0.00924171	0.00599297	Hif1a/Stat3/Ep300/Bnip3/Prkce/Cpeb1/Ajuba/Pdk3/Rora/Kcnk2/Stox1/Zfp36l1/Egln3	13	GO_BP	down
GO:0072006	nephron development	13/871	162/28891	0.00130637	0.00924171	0.00599297	Ext1/Notch2/Npnt/Greb1l/Gli3/Cd44/Myo1e/Plce1/Itga3/Hs3st3a1/Gpc3/Basp1/Angpt1	13	GO_BP	down
GO:1902305	regulation of sodium ion transmembrane transport	8/871	71/28891	0.00131467	0.00928788	0.00602291	Nedd4/Ank3/Slmap/Ywhah/Fgf13/Fgf14/Grip1/Grp	8	GO_BP	down
GO:0003281	ventricular septum development	9/871	88/28891	0.00134561	0.00944265	0.00612327	Luzp1/Bmpr2/Tgfbr3/Sav1/Ccn1/Robo1/Fzd2/Robo2/Zfpm2	9	GO_BP	down
GO:0060603	mammary gland duct morphogenesis	6/871	41/28891	0.00134776	0.00944265	0.00612327	Nr3c1/Med1/Btrc/Ar/Robo1/Gli2	6	GO_BP	down
GO:0070849	response to epidermal growth factor	6/871	41/28891	0.00134776	0.00944265	0.00612327	Iqgap1/Med1/Stat5b/Egfr/Zfp36l2/Zfp36l1	6	GO_BP	down
GO:0071711	basement membrane organization	6/871	41/28891	0.00134776	0.00944265	0.00612327	Ext1/Col4a1/Large1/Pmp22/Phldb2/Lamb3	6	GO_BP	down
GO:0014013	regulation of gliogenesis	12/871	143/28891	0.00134921	0.00944265	0.00612327	Qki/Nf2/Il6st/Cysltr2/Egfr/Ski/Ptpra/Tspo/Ptprz1/Ldlr/Ptn/Vim	12	GO_BP	down
GO:0042303	molting cycle	12/871	143/28891	0.00134921	0.00944265	0.00612327	Ext1/Trp63/Mysm1/Sav1/Trps1/Sos1/Mfsd12/Egfr/Edaradd/Myo5a/Eda/Gli2	12	GO_BP	down
GO:0042633	hair cycle	12/871	143/28891	0.00134921	0.00944265	0.00612327	Ext1/Trp63/Mysm1/Sav1/Trps1/Sos1/Mfsd12/Egfr/Edaradd/Myo5a/Eda/Gli2	12	GO_BP	down
GO:0045648	positive regulation of erythrocyte differentiation	5/871	28/28891	0.00135904	0.00948608	0.00615143	Hif1a/Stat3/Med1/Mapk14/Stat5b	5	GO_BP	down
GO:0099558	maintenance of synapse structure	5/871	28/28891	0.00135904	0.00948608	0.00615143	Cadm1/Grn/Ophn1/Nlgn1/Sema3a	5	GO_BP	down
GO:0071826	protein-RNA complex organization	14/871	183/28891	0.00137282	0.00956952	0.00620554	Snrpg/Cpsf6/Rps27/Mbnl1/Celf2/Srpk1/Prpf39/Adar/Atm/Atr/Prpf8/Naf1/Setx/Eif2s3y	14	GO_BP	down
GO:0016236	macroautophagy	18/871	268/28891	0.00139289	0.00969652	0.0062879	Hif1a/Vti1a/Synpo2/Pikfyve/Lgals8/Prkn/Stk3/Mtmr3/Tbc1d5/Gaa/Bnip3/Nrbp2/Atm/Vps41/Snx30/Rnf213/Tbc1d12/Myo5a	18	GO_BP	down
GO:0009749	response to glucose	15/871	204/28891	0.00140174	0.00974516	0.00631943	Hif1a/Rab34/Zbtb20/Ep300/Prkn/Abcg1/Tiam1/Stxbp4/Prkce/Pdk3/Gpr27/Igf1r/Efna5/Rasal2/Aqp4	15	GO_BP	down
GO:0051098	regulation of binding	24/871	405/28891	0.00142023	0.00981427	0.00636426	Mbd2/Brd4/Rapgef2/Cpne1/Ep300/Prkn/Tgfbr3/Stk3/Krit1/Tiam1/Hipk2/Sp100/B2m/Hdac4/Cald1/Atr/Large1/Ski/Pkd1/Cblb/Plcl2/Apoe/Wfikkn2/Angpt1	24	GO_BP	down
GO:0031958	corticosteroid receptor signaling pathway	4/871	17/28891	0.00142668	0.00981427	0.00636426	Nedd4/Nr3c1/Ncoa2/Ywhah	4	GO_BP	down
GO:0042159	lipoprotein catabolic process	4/871	17/28891	0.00142668	0.00981427	0.00636426	Atm/Abhd17c/Apoe/Ldlr	4	GO_BP	down
GO:0042711	maternal behavior	4/871	17/28891	0.00142668	0.00981427	0.00636426	Gnaq/Nr3c1/Mbd2/Npas3	4	GO_BP	down
GO:0060766	negative regulation of androgen receptor signaling pathway	4/871	17/28891	0.00142668	0.00981427	0.00636426	Ncor1/Ncor2/Pias2/Sfrp1	4	GO_BP	down
GO:0061318	renal filtration cell differentiation	4/871	17/28891	0.00142668	0.00981427	0.00636426	Ext1/Notch2/Myo1e/Basp1	4	GO_BP	down
GO:0072112	podocyte differentiation	4/871	17/28891	0.00142668	0.00981427	0.00636426	Ext1/Notch2/Myo1e/Basp1	4	GO_BP	down
GO:0072311	glomerular epithelial cell differentiation	4/871	17/28891	0.00142668	0.00981427	0.00636426	Ext1/Notch2/Myo1e/Basp1	4	GO_BP	down
GO:0032507	maintenance of protein location in cell	8/871	72/28891	0.00144062	0.00988423	0.00640962	Ank3/Tmsb10/Vps13a/Sp100/Ccdc88a/Tspo/Srgn/Syne1	8	GO_BP	down
GO:0071479	cellular response to ionizing radiation	8/871	72/28891	0.00144062	0.00988423	0.00640962	Tank/Mapk14/Bcl2l1/Atm/Wrn/Atr/Sfrp1/Spidr	8	GO_BP	down
GO:0055088	lipid homeostasis	14/871	184/28891	0.00144569	0.00990599	0.00642373	Ncor1/Pnpla8/Zbtb20/Abcg1/Abca1/Thada/Tspo/Rora/Apoe/Cyp7b1/Ldlr/Hdac9/Gramd1b/Lpl	14	GO_BP	down
GO:0014855	striated muscle cell proliferation	9/871	89/28891	0.00145773	0.00996241	0.00646032	Stat3/Smad1/Jarid2/Mapk14/Tgfbr3/Sav1/Kcnk2/Angpt1/Zfpm2	9	GO_BP	down
GO:0035019	somatic stem cell population maintenance	9/871	89/28891	0.00145773	0.00996241	0.00646032	Stat3/Braf/Kat6a/Trp63/Rif1/Bcl9l/Ski/Sfrp1/Zfp36l2	9	GO_BP	down
GO:0030510	regulation of BMP signaling pathway	10/871	107/28891	0.00148653	0.010146	0.00657936	Notch2/Crim1/Tgfbr3/Hipk2/Ski/Ccn1/Sfrp1/Itga3/Fbn1/Gpc3	10	GO_BP	down
GO:0044772	mitotic cell cycle phase transition	26/871	454/28891	0.00149345	0.01018	0.0066014	Kmt2e/Arid1b/Crebbp/Ankrd17/Brd4/Cdk5rap2/Smarcc2/Ccnd3/Ube2e2/Bcl7a/Ddb1/Pdpn/Anapc1/Atm/Egfr/Rad50/Nbn/Pkd1/Prkcq/Camk2b/Cdc14b/Pkd2/Zfp36l2/Stox1/Zfp36l1/Myo16	26	GO_BP	down
GO:0099003	vesicle-mediated transport in synapse	18/871	270/28891	0.00151299	0.0102998	0.00667908	Nedd4/Fcho2/Braf/Prkn/Lpar1/Dennd1a/Synj2/Bcl2l1/Pclo/Prkca/Grn/Fgf14/Stxbp5/Ophn1/Nlgn1/Grip1/Magi2/Syt1	18	GO_BP	down
GO:0000723	telomere maintenance	12/871	145/28891	0.00151983	0.0103329	0.00670056	Cct4/Rif1/Map3k4/Sp100/Atm/Wrn/Atr/Rad50/Nbn/Naf1/Prkcq/Ylpm1	12	GO_BP	down
GO:0060325	face morphogenesis	6/871	42/28891	0.00153282	0.0103942	0.00674033	Crebbp/Kat6a/Ep300/Ski/Zfp950/Schip1	6	GO_BP	down
GO:1900744	regulation of p38MAPK cascade	6/871	42/28891	0.00153282	0.0103942	0.00674033	Map3k3/Ptpn22/Map3k4/Gadd45g/Mfhas1/Xdh	6	GO_BP	down
GO:0007162	negative regulation of cell adhesion	20/871	315/28891	0.00153639	0.0104049	0.00674725	Lgals9/Nf2/Ptpn22/Itch/Pik3r1/Gli3/Cd44/Gstp1/Il20rb/Efna5/Ptprz1/Cblb/Plxna2/Tnc/Phldb2/Swap70/Lgals1/Cyp1b1/Angpt1/Sema3e	20	GO_BP	down
GO:1903320	regulation of protein modification by small protein conjugation or removal	17/871	249/28891	0.00156796	0.010605	0.00687703	Hif1a/Svbp/Tank/Mycbp2/N4bp1/Btrc/Prkn/Ptpn22/Itch/Birc2/Prkce/Hdac4/Spopl/Tspo/Cblb/Rnf180/Angpt1	17	GO_BP	down
GO:0048678	response to axon injury	8/871	73/28891	0.00157596	0.0106316	0.00689429	Braf/Flna/Kremen1/Grn/Igf1r/Xylt1/Tnc/Ptn	8	GO_BP	down
GO:0070936	protein K48-linked ubiquitination	8/871	73/28891	0.00157596	0.0106316	0.00689429	Ttc3/Znrf1/Ube3c/Btrc/Ube2e2/Prkn/Itch/Birc2	8	GO_BP	down
GO:0097061	dendritic spine organization	10/871	108/28891	0.0015949	0.0107371	0.00696267	Tiam1/Mfn1/Ctnnd2/Igf1r/Camk2b/Apoe/Itga3/Nlgn1/Dock10/Pak3	10	GO_BP	down
GO:0042059	negative regulation of epidermal growth factor receptor signaling pathway	5/871	29/28891	0.00160185	0.0107371	0.00696267	Mvp/Ptprj/Egfr/Cblb/Itga1	5	GO_BP	down
GO:0051767	nitric-oxide synthase biosynthetic process	5/871	29/28891	0.00160185	0.0107371	0.00696267	Map2k3/Cpeb1/Gstp1/Map2k6/Fcer2a	5	GO_BP	down
GO:0051769	regulation of nitric-oxide synthase biosynthetic process	5/871	29/28891	0.00160185	0.0107371	0.00696267	Map2k3/Cpeb1/Gstp1/Map2k6/Fcer2a	5	GO_BP	down
GO:1900745	positive regulation of p38MAPK cascade	5/871	29/28891	0.00160185	0.0107371	0.00696267	Map3k3/Map3k4/Gadd45g/Mfhas1/Xdh	5	GO_BP	down
GO:0009746	response to hexose	15/871	207/28891	0.00161927	0.01084	0.0070294	Hif1a/Rab34/Zbtb20/Ep300/Prkn/Abcg1/Tiam1/Stxbp4/Prkce/Pdk3/Gpr27/Igf1r/Efna5/Rasal2/Aqp4	15	GO_BP	down
GO:2000045	regulation of G1/S transition of mitotic cell cycle	13/871	166/28891	0.00162807	0.010885	0.00705859	Kmt2e/Arid1b/Crebbp/Ankrd17/Smarcc2/Ube2e2/Bcl7a/Pdpn/Egfr/Pkd1/Pkd2/Stox1/Myo16	13	GO_BP	down
GO:0071214	cellular response to abiotic stimulus	21/871	340/28891	0.00166672	0.011115	0.00720774	Nedd4/Tank/Crebbp/N4bp1/Mapk14/Tmem150c/Ep300/Ddb1/Pik3r1/Cnn2/Plec/Bcl2l1/Atm/Wrn/Atr/Ptprk/Crip1/Sfrp1/Pkd2/Spidr/Zfp36l1	21	GO_BP	down
GO:0104004	cellular response to environmental stimulus	21/871	340/28891	0.00166672	0.011115	0.00720774	Nedd4/Tank/Crebbp/N4bp1/Mapk14/Tmem150c/Ep300/Ddb1/Pik3r1/Cnn2/Plec/Bcl2l1/Atm/Wrn/Atr/Ptprk/Crip1/Sfrp1/Pkd2/Spidr/Zfp36l1	21	GO_BP	down
GO:1902115	regulation of organelle assembly	16/871	229/28891	0.00167919	0.0111839	0.00725244	G3bp1/Pan3/Map4/Cdk5rap2/Pikfyve/Nf2/Mtmr3/Lpar1/Snx30/Dync2li1/Ccdc88a/Tbc1d12/Wdpcp/Sdccag8/Trim37/Syne1	16	GO_BP	down
GO:0043484	regulation of RNA splicing	14/871	187/28891	0.00168392	0.0112012	0.00726362	Rbm25/Slc38a2/Qki/Ddx17/Zfp638/Dyrk1a/Supt20/Ahnak/Mbnl1/Celf2/Pik3r1/Fam172a/Setx/Rbfox1	14	GO_BP	down
GO:0034284	response to monosaccharide	15/871	208/28891	0.00169777	0.0112647	0.00730479	Hif1a/Rab34/Zbtb20/Ep300/Prkn/Abcg1/Tiam1/Stxbp4/Prkce/Pdk3/Gpr27/Igf1r/Efna5/Rasal2/Aqp4	15	GO_BP	down
GO:0045732	positive regulation of protein catabolic process	15/871	208/28891	0.00169777	0.0112647	0.00730479	Nedd4/Ubr3/Fbxo11/Prkn/Itch/Ddb1/Cblb/Apoe/Sh3rf3/Trim30a/Ldlr/Ecscr/Gpc3/Rnf180/Cbfa2t3	15	GO_BP	down
GO:0071277	cellular response to calcium ion	9/871	91/28891	0.00170448	0.0112949	0.00732438	Cpne3/Iqgap1/Braf/Cpne1/Trpm2/Pkd2/Nlgn1/Alox15/Syt1	9	GO_BP	down
GO:0007156	homophilic cell adhesion via plasma membrane adhesion molecules	10/871	109/28891	0.0017096	0.0113145	0.00733707	Nectin1/Tenm3/Cadm1/Cdh4/Dsg2/Cdh11/Robo1/Pcdh15/Cdhr1/Robo2	10	GO_BP	down
GO:0031099	regeneration	13/871	167/28891	0.001718	0.0113557	0.00736383	Braf/Med1/Flna/Upf2/Kremen1/Large1/Egfr/Grn/Adm/Igf1r/Xylt1/Tnc/Ptn	13	GO_BP	down
GO:0043506	regulation of JUN kinase activity	8/871	74/28891	0.00172117	0.0113623	0.00736811	Ptpn22/Map3k4/Tiam1/Fgd4/Map3k10/Gstp1/Ccl19/Sfrp1	8	GO_BP	down
GO:0033059	cellular pigmentation	7/871	58/28891	0.00174452	0.011502	0.00745866	Ap3b1/Ap1g1/Pikfyve/Cd63/Shroom2/Apoe/Myo5a	7	GO_BP	down
GO:0099504	synaptic vesicle cycle	16/871	230/28891	0.00175562	0.0115606	0.00749667	Fcho2/Braf/Prkn/Lpar1/Dennd1a/Synj2/Bcl2l1/Pclo/Prkca/Grn/Fgf14/Stxbp5/Ophn1/Nlgn1/Magi2/Syt1	16	GO_BP	down
GO:0003015	heart process	17/871	252/28891	0.00178091	0.0117124	0.00759513	Ext1/Flna/Pik3r1/Gaa/Hdac4/Map2k3/Prkca/Pde4d/Fgf13/Vegfb/Adm/Dsg2/Map2k6/Sema3a/Myl1/Adra1a/Slc8a1	17	GO_BP	down
GO:0036035	osteoclast development	4/871	18/28891	0.00179085	0.0117189	0.00759932	Notch2/Lrrk1/Tjp2/Fbn1	4	GO_BP	down
GO:0060746	parental behavior	4/871	18/28891	0.00179085	0.0117189	0.00759932	Gnaq/Nr3c1/Mbd2/Npas3	4	GO_BP	down
GO:0098751	bone cell development	4/871	18/28891	0.00179085	0.0117189	0.00759932	Notch2/Lrrk1/Tjp2/Fbn1	4	GO_BP	down
GO:1905809	negative regulation of synapse organization	4/871	18/28891	0.00179085	0.0117189	0.00759932	Apoe/Epha7/Robo1/Ptn	4	GO_BP	down
GO:0051047	positive regulation of secretion	25/871	437/28891	0.00184832	0.0120799	0.00783341	Gnaq/Hif1a/Nr3c1/Oga/Ap1g1/Rab34/Ep300/Prkn/Abcg1/Prkce/Bcl2l1/Myo18a/Egfr/Prkca/Gpr27/Stxbp5/Prkcq/Ang/Mcu/Trpm2/Map2k6/Nlgn1/Nell2/Prkd1/Syt1	25	GO_BP	down
GO:0061387	regulation of extent of cell growth	11/871	129/28891	0.00185489	0.0121069	0.00785095	Ttc3/Bmpr2/Ep300/Cdh4/Arhgap32/Fgf13/Efna5/Apoe/Epha7/Sema3a/Sema3e	11	GO_BP	down
GO:0048545	response to steroid hormone	17/871	253/28891	0.00185708	0.0121069	0.00785095	Ncor1/Nedd4/Nr3c1/Ddx17/Ncoa2/Med1/Ncor2/Trp63/Ep300/Pik3r1/Ywhah/Pias2/Ar/Sfrp1/Zfp36l2/Cyp7b1/Zfp36l1	17	GO_BP	down
GO:0045070	positive regulation of viral genome replication	5/871	30/28891	0.00187506	0.0121937	0.00790723	Top2b/Srpk1/Ddb1/Adar/Gbp7	5	GO_BP	down
GO:0061298	retina vasculature development in camera-type eye	5/871	30/28891	0.00187506	0.0121937	0.00790723	Hif1a/Col4a1/Bmpr2/Large1/Cyp1b1	5	GO_BP	down
GO:0022411	cellular component disassembly	26/871	462/28891	0.00190197	0.0123533	0.00801076	Mical3/Hif1a/Mid1/Eml4/Gbf1/Map4/Oga/Smarcc2/Prkn/Scaf8/Pik3r1/Blcap/Shfl/Pdpn/Bnip3/Flii/Snx30/Fgf13/Shroom2/Tspo/Igf1r/Setx/Nckap5/Lmod1/Swap70/C3	26	GO_BP	down
GO:1904062	regulation of monoatomic cation transmembrane transport	22/871	367/28891	0.00190538	0.0123602	0.0080152	Nedd4/Ank3/Ubr3/Fbxo11/Slmap/Oga/Flna/Ahnak/Cd63/Ptpn22/Ywhah/Prkce/Pde4d/Fgf13/Fgf14/Gem/Pkd2/Grip1/Grp/Myo5a/Prkd1/Slc8a1	22	GO_BP	down
GO:0030509	BMP signaling pathway	13/871	169/28891	0.00191019	0.0123608	0.00801558	Smad1/Ext1/Notch2/Bmpr2/Crim1/Tgfbr3/Hipk2/Ski/Ccn1/Sfrp1/Itga3/Fbn1/Gpc3	13	GO_BP	down
GO:0035725	sodium ion transmembrane transport	13/871	169/28891	0.00191019	0.0123608	0.00801558	Nedd4/Ank3/Slmap/Ywhah/Slc9a9/Fgf13/Fgf14/Pkd2/Grip1/Grp/Slc24a3/Slc8a1/Scn7a	13	GO_BP	down
GO:0090101	negative regulation of transmembrane receptor protein serine/threonine kinase signaling pathway	12/871	149/28891	0.00191459	0.0123739	0.00802412	Chst11/Crim1/Tgfbr3/Hipk2/Bcl9l/Ski/Ldlrad4/Sfrp1/Fbn1/Magi2/Wfikkn2/Ucma	12	GO_BP	down
GO:0033157	regulation of intracellular protein transport	16/871	232/28891	0.00191723	0.0123757	0.00802525	Ank3/Ptpn14/Mapk14/Flna/Ep300/Ptpn22/Pik3r1/Sp100/Edem1/Gli3/Prkcq/Tcaf2/Prkd1/Wipf1/Angpt1/Camk4	16	GO_BP	down
GO:0001961	positive regulation of cytokine-mediated signaling pathway	7/871	59/28891	0.00192874	0.0123889	0.00803382	Hif1a/Med1/Cpne1/Prkn/Irf7/Trim56/Zbp1	7	GO_BP	down
GO:0006513	protein monoubiquitination	7/871	59/28891	0.00192874	0.0123889	0.00803382	Nedd4/Prkn/Trim25/Itch/Birc2/Trim56/Pcgf5	7	GO_BP	down
GO:0031663	lipopolysaccharide-mediated signaling pathway	7/871	59/28891	0.00192874	0.0123889	0.00803382	Mapk14/Trim12c/Ptpn22/Trim12a/Prkce/Prkca/Trim30a	7	GO_BP	down
GO:2000630	positive regulation of miRNA metabolic process	7/871	59/28891	0.00192874	0.0123889	0.00803382	Hif1a/Stat3/Smad1/Nr3c1/Tead1/Egfr/Ar	7	GO_BP	down
GO:0045022	early endosome to late endosome transport	6/871	44/28891	0.00196028	0.0125607	0.0081452	Hook3/Stx8/Snx16/Flna/Hook2/Nf2	6	GO_BP	down
GO:0046621	negative regulation of organ growth	6/871	44/28891	0.00196028	0.0125607	0.0081452	Jarid2/Wwc1/Stk3/Sav1/Wwc2/Kcnk2	6	GO_BP	down
GO:0043406	positive regulation of MAP kinase activity	11/871	130/28891	0.00197245	0.0126232	0.00818577	Iqgap1/Map3k4/Tiam1/Fgd4/Egfr/Ajuba/Map3k10/Ccl19/Map2k6/Robo1/Ghr	11	GO_BP	down
GO:0000082	G1/S transition of mitotic cell cycle	16/871	233/28891	0.00200258	0.0128004	0.00830066	Kmt2e/Arid1b/Crebbp/Ankrd17/Brd4/Smarcc2/Ccnd3/Ube2e2/Bcl7a/Pdpn/Egfr/Pkd1/Camk2b/Pkd2/Stox1/Myo16	16	GO_BP	down
GO:0016482	cytosolic transport	13/871	170/28891	0.00201274	0.0128496	0.0083326	Hook3/Stx8/Snx16/Vti1a/Gbf1/Ccdc91/Flna/Ap1g1/Hook2/Pikfyve/Washc2/Nf2/Tbc1d5	13	GO_BP	down
GO:0032200	telomere organization	12/871	150/28891	0.0020254	0.0129147	0.0083748	Cct4/Rif1/Map3k4/Sp100/Atm/Wrn/Atr/Rad50/Nbn/Naf1/Prkcq/Ylpm1	12	GO_BP	down
GO:1901224	positive regulation of non-canonical NF-kappaB signal transduction	8/871	76/28891	0.00204319	0.0130096	0.00843634	Ank3/Crebbp/Ep300/Egfr/Trim56/Ccl19/Edaradd/Eda	8	GO_BP	down
GO:0010506	regulation of autophagy	19/871	300/28891	0.00204526	0.0130096	0.00843634	Hif1a/Stat3/Herc1/Dram1/Trim12c/Ep300/Prkn/Ptpn22/Mtmr3/Trim12a/Bnip3/Nrbp2/Atm/Snx30/Tspo/Rragd/Trim30a/Prkd1/Adra1a	19	GO_BP	down
GO:0032386	regulation of intracellular transport	21/871	346/28891	0.00205809	0.0130606	0.00846941	Ppp1r12a/Nedd4/Ank3/Thoc2/Cpsf6/Ptpn14/Mapk14/Flna/Ep300/Nf2/Ptpn22/Pik3r1/Sp100/Edem1/Gli3/Prkcq/Tcaf2/Prkd1/Wipf1/Angpt1/Camk4	21	GO_BP	down
GO:0002449	lymphocyte mediated immunity	27/871	489/28891	0.00205826	0.0130606	0.00846941	H2-D1/H2-K1/Tap1/H2-T22/Cyrib/Lgals9/Ap1g1/Rif1/Stat5b/Trp53bp1/Cadm1/Irf7/B2m/Serpinb9/H2-Q4/Nbn/H2-M3/Il20rb/H2-Q7/Stat5a/Swap70/Aire/H2-Q6/H2-Q2/H2-M2/C3/Fcer2a	27	GO_BP	down
GO:0002702	positive regulation of production of molecular mediator of immune response	13/871	171/28891	0.00211978	0.0134185	0.00870146	H2-D1/H2-K1/H2-T22/Rigi/Rif1/Trp53bp1/Ptpn22/B2m/H2-Q4/H2-Q7/H2-Q6/H2-Q2/H2-M2	13	GO_BP	down
GO:0034250	positive regulation of amide metabolic process	13/871	171/28891	0.00211978	0.0134185	0.00870146	Rbms3/Upf3b/Impact/Ep300/Abcg1/Cpeb3/Cpeb1/Ccn1/Ifngr1/Apoe/Cyp1b1/Slc2a13/Vim	13	GO_BP	down
GO:0043030	regulation of macrophage activation	7/871	60/28891	0.00212767	0.0134521	0.0087233	Lgals9/Atm/Myo18a/Grn/Rora/Mfhas1/Ldlr	7	GO_BP	down
GO:0043525	positive regulation of neuron apoptotic process	9/871	94/28891	0.0021362	0.0134898	0.00874771	Nr3c1/Hdac4/Atm/Grn/Kcnma1/Ascl1/Epha7/Pak3/Itga1	9	GO_BP	down
GO:0034763	negative regulation of transmembrane transport	12/871	151/28891	0.00214141	0.0135063	0.00875845	Nedd4/Ank3/Ubr3/Fbxo11/Prkce/Prkca/Gem/Pkd2/Tcaf2/Grip1/Grp/Grb10	12	GO_BP	down
GO:0002460	adaptive immune response based on somatic recombination of immune receptors built from immunoglobulin superfamily domains	27/871	491/28891	0.00217877	0.0136362	0.00884268	H2-D1/H2-K1/Stat3/H2-T22/Nfkb2/Cyrib/Rif1/Trp53bp1/Irf7/B2m/Gadd45g/Serpinb9/H2-Q4/Nbn/H2-M3/Il20rb/Ccl19/H2-Q7/Prkcq/Rora/Swap70/Aire/H2-Q6/H2-Q2/H2-M2/C3/Fcer2a	27	GO_BP	down
GO:0042391	regulation of membrane potential	27/871	491/28891	0.00217877	0.0136362	0.00884268	Gnaq/Nedd4/Ank3/Slmap/Oga/Flna/Prkn/Ywhah/Bnip3/Prkce/B2m/Bcl2l1/Mfn1/Pclo/Fgf13/Fgf14/Kcnma1/Tspo/Kcnk2/Dsg2/Pmp22/Stox1/Nlgn1/Ptn/Adra1a/Slc8a1/Scn7a	27	GO_BP	down
GO:0002026	regulation of the force of heart contraction	5/871	31/28891	0.00218084	0.0136362	0.00884268	Gaa/Prkca/Adm/Adra1a/Slc8a1	5	GO_BP	down
GO:0015012	heparan sulfate proteoglycan biosynthetic process	5/871	31/28891	0.00218084	0.0136362	0.00884268	Ext1/Xylt1/Extl1/Hs3st3a1/Hs3st4	5	GO_BP	down
GO:0032801	receptor catabolic process	5/871	31/28891	0.00218084	0.0136362	0.00884268	Nedd4/Itch/Rnf43/Gprasp1/Apoe	5	GO_BP	down
GO:0033688	regulation of osteoblast proliferation	5/871	31/28891	0.00218084	0.0136362	0.00884268	Nf2/Fbln5/Ccn1/Igf1r/Sfrp1	5	GO_BP	down
GO:2000629	negative regulation of miRNA metabolic process	5/871	31/28891	0.00218084	0.0136362	0.00884268	Ncor1/Hif1a/Ncor2/Ep300/Hdac4	5	GO_BP	down
GO:0006470	protein dephosphorylation	16/871	235/28891	0.00218284	0.0136362	0.00884268	Ppp1r12a/Ptpn14/Ppp4r3a/Btrc/Ptpn22/Mtmr3/Ptprj/Ptprk/Ptpra/Mgat5/Ptprz1/Cdc14b/Mfhas1/Swap70/Magi2/Itga1	16	GO_BP	down
GO:0050878	regulation of body fluid levels	21/871	348/28891	0.00220474	0.0137096	0.00889028	Gnaq/Hif1a/Ap3b1/Ext1/Med1/Flna/Stat5b/Ptprj/Pdpn/Prkce/Egfr/Prkca/Stat5a/Adm/Kcnma1/Prkcq/Pros1/Apoe/Xdh/Tspan18/Aqp4	21	GO_BP	down
GO:0045747	positive regulation of Notch signaling pathway	6/871	45/28891	0.00220507	0.0137096	0.00889028	Stat3/Trp63/Il6st/Ascl1/Robo1/Robo2	6	GO_BP	down
GO:0085029	extracellular matrix assembly	6/871	45/28891	0.00220507	0.0137096	0.00889028	Fbln5/Phldb2/Lamb3/Ltbp4/Myh11/Antxr1	6	GO_BP	down
GO:1900087	positive regulation of G1/S transition of mitotic cell cycle	6/871	45/28891	0.00220507	0.0137096	0.00889028	Kmt2e/Crebbp/Ankrd17/Ube2e2/Egfr/Stox1	6	GO_BP	down
GO:0033145	positive regulation of intracellular steroid hormone receptor signaling pathway	4/871	19/28891	0.00221473	0.0137208	0.00889754	Nr3c1/Ncoa2/Med1/Ar	4	GO_BP	down
GO:0045986	negative regulation of smooth muscle contraction	4/871	19/28891	0.00221473	0.0137208	0.00889754	Kcnma1/Calcrl/Irag1/Dock4	4	GO_BP	down
GO:0072010	glomerular epithelium development	4/871	19/28891	0.00221473	0.0137208	0.00889754	Ext1/Notch2/Myo1e/Basp1	4	GO_BP	down
GO:0045669	positive regulation of osteoblast differentiation	8/871	77/28891	0.00222104	0.0137437	0.00891235	Smad1/Bmpr2/Trp63/Il6st/Npnt/Gli3/Ccn1/Prkd1	8	GO_BP	down
GO:0001823	mesonephros development	10/871	113/28891	0.00223695	0.0137701	0.0089295	Smad1/Npnt/Greb1l/Gli3/Cd44/Sfrp1/Hs3st3a1/Gpc3/Zbtb16/Robo2	10	GO_BP	down
GO:0002637	regulation of immunoglobulin production	10/871	113/28891	0.00223695	0.0137701	0.0089295	H2-D1/H2-K1/H2-T22/Rif1/Trp53bp1/H2-Q4/H2-Q7/H2-Q6/H2-Q2/H2-M2	10	GO_BP	down
GO:0042116	macrophage activation	10/871	113/28891	0.00223695	0.0137701	0.0089295	Lgals9/Prkce/Atm/Myo18a/Grn/Ifngr1/Rora/Mfhas1/Ldlr/Fcer2a	10	GO_BP	down
GO:0110020	regulation of actomyosin structure organization	10/871	113/28891	0.00223695	0.0137701	0.0089295	Braf/Cd47/Ep300/Nf2/Pik3r1/Lpar1/Prkcq/Ccdc88a/Phldb2/Prkd1	10	GO_BP	down
GO:0051648	vesicle localization	15/871	214/28891	0.00223847	0.0137701	0.0089295	Ap3b1/Exoc4/Gbf1/Exoc6b/Fnbp1l/Prkn/Bcl2l1/Pclo/Myo1e/Shroom2/Trak2/Nlgn1/Magi2/Myo5a/Dync1i1	15	GO_BP	down
GO:0048660	regulation of smooth muscle cell proliferation	14/871	193/28891	0.00225887	0.0138793	0.00900031	Gnaq/Hif1a/Bmpr2/Stat5b/Pik3r1/Hdac4/Egfr/Prkca/Gstp1/Pde4d/Igf1r/Ang/Calcrl/Apoe	14	GO_BP	down
GO:0003206	cardiac chamber morphogenesis	12/871	152/28891	0.00226279	0.0138871	0.00900535	Hif1a/Notch2/Bmpr2/Med1/Tgfbr3/Sav1/Sos1/Ccn1/Robo1/Fzd2/Robo2/Zfpm2	12	GO_BP	down
GO:0032651	regulation of interleukin-1 beta production	9/871	95/28891	0.00229801	0.0140703	0.00912416	Stmp1/Stat3/S1pr3/Gsdmd/Gstp1/Ccn1/Ccl19/Lpl/Aqp4	9	GO_BP	down
GO:0042475	odontogenesis of dentin-containing tooth	9/871	95/28891	0.00229801	0.0140703	0.00912416	Nectin1/Trp63/Nf2/Itga6/Gli3/Edaradd/Eda/Gli2/Dmrt3	9	GO_BP	down
GO:0019748	secondary metabolic process	7/871	61/28891	0.00234209	0.0143067	0.00927744	Rapgef2/As3mt/Fmo1/Mfsd12/Myo5a/Pam/Cyp1b1	7	GO_BP	down
GO:0035924	cellular response to vascular endothelial growth factor stimulus	7/871	61/28891	0.00234209	0.0143067	0.00927744	Mapk14/Cd63/Map2k3/Vegfb/Xdh/Robo1/Prkd1	7	GO_BP	down
GO:0002237	response to molecule of bacterial origin	24/871	421/28891	0.00235958	0.0143945	0.00933441	Bcr/Mapk14/Cyrib/Lgals9/Trim12c/Stat5b/Ptpn22/Trim12a/Cxcl16/Prkce/B2m/Map2k3/Prpf8/Prkca/Abca1/Gstp1/Pde4d/Mapkapk3/H2-M3/Adm/Rps6ka3/Trim30a/Plscr2/Vim	24	GO_BP	down
GO:0099072	regulation of postsynaptic membrane neurotransmitter receptor levels	11/871	133/28891	0.00236197	0.0143945	0.00933441	Nedd4/Nbea/Flot2/Prkn/Lpar1/Stxbp4/Ctnnd2/Neto2/Ophn1/Grip1/Magi2	11	GO_BP	down
GO:0002720	positive regulation of cytokine production involved in immune response	10/871	114/28891	0.00238734	0.0145299	0.00942217	H2-D1/H2-K1/H2-T22/Rigi/B2m/H2-Q4/H2-Q7/H2-Q6/H2-Q2/H2-M2	10	GO_BP	down
GO:0003231	cardiac ventricle development	12/871	153/28891	0.00238973	0.0145299	0.00942217	Luzp1/Hif1a/Bmpr2/Med1/Tgfbr3/Sav1/Greb1l/Ccn1/Robo1/Fzd2/Robo2/Zfpm2	12	GO_BP	down
GO:0051865	protein autoubiquitination	8/871	78/28891	0.00241081	0.0146411	0.00949429	Prkn/Itch/Cnot4/Rnf213/Trim37/Sh3rf3/Trim30a/Rnf183	8	GO_BP	down
GO:0032204	regulation of telomere maintenance	9/871	96/28891	0.00246941	0.0149618	0.00970225	Cct4/Map3k4/Atm/Atr/Rad50/Nbn/Naf1/Prkcq/Ylpm1	9	GO_BP	down
GO:0006356	regulation of transcription by RNA polymerase I	6/871	46/28891	0.00247219	0.0149618	0.00970225	Dek/Crebbp/Flna/Wdr43/Macroh2a2/Ippk	6	GO_BP	down
GO:1902991	regulation of amyloid precursor protein catabolic process	6/871	46/28891	0.00247219	0.0149618	0.00970225	Ranbp9/Flot2/Abcg1/Ifngr1/Apoe/Slc2a13	6	GO_BP	down
GO:0006397	mRNA processing	27/871	496/28891	0.00250673	0.0151533	0.00982644	Snrpg/Pabpc1/Thoc2/Rbbp6/Pan3/Rbm25/Qki/Zc3h14/Ddx17/Rbm6/Cpsf6/Dyrk1a/Cwf19l2/Virma/Mbnl1/Celf2/Srpk1/Scaf8/Prpf39/Adar/Tdrd3/Cpeb1/Prpf8/Fam172a/Setx/Rbfox1/Zfp36l1	27	GO_BP	down
GO:0001945	lymph vessel development	5/871	32/28891	0.00252138	0.0151892	0.00984975	Bmpr2/Ptpn14/Lgals8/Pdpn/Pkd1	5	GO_BP	down
GO:0007263	nitric oxide mediated signal transduction	5/871	32/28891	0.00252138	0.0151892	0.00984975	Mt1/Egfr/Mt2/Gucy1a2/Apoe	5	GO_BP	down
GO:0061036	positive regulation of cartilage development	5/871	32/28891	0.00252138	0.0151892	0.00984975	Smad1/Gli3/Ccn1/Pkdcc/Zbtb16	5	GO_BP	down
GO:0051591	response to cAMP	7/871	62/28891	0.00257276	0.0154809	0.0100389	Braf/Rapgef2/Pik3r1/Pde4d/Pkd2/Zfp36l1/Slc8a1	7	GO_BP	down
GO:0014009	glial cell proliferation	8/871	79/28891	0.00261305	0.0156873	0.0101727	Nf2/Cysltr2/Egfr/Ski/Tspo/Pmp22/Ptn/Vim	8	GO_BP	down
GO:0061180	mammary gland epithelium development	8/871	79/28891	0.00261305	0.0156873	0.0101727	Hif1a/Nr3c1/Med1/Btrc/Stat5a/Ar/Robo1/Gli2	8	GO_BP	down
GO:0044344	cellular response to fibroblast growth factor stimulus	9/871	97/28891	0.0026508	0.0158957	0.0103079	Iqgap1/Ext1/Sos1/Cd44/Setx/Sfrp1/Hhip/Zfp36l2/Zfp36l1	9	GO_BP	down
GO:0043500	muscle adaptation	11/871	135/28891	0.00265461	0.0159003	0.0103109	Smad1/Nr3c1/Jarid2/Oga/Adk/Ep300/Tead1/Hdac4/Prkca/Ar/Adra1a	11	GO_BP	down
GO:0006814	sodium ion transport	17/871	262/28891	0.00267424	0.0159996	0.0103753	Nedd4/Ank3/Slc38a2/Slmap/Ywhah/Slc9a9/Fgf13/Fgf14/Trpm2/Pkd2/Nkain4/Akt3/Grip1/Grp/Slc24a3/Slc8a1/Scn7a	17	GO_BP	down
GO:0097091	synaptic vesicle clustering	4/871	20/28891	0.00270297	0.0161346	0.0104628	Bcl2l1/Pclo/Nlgn1/Magi2	4	GO_BP	down
GO:1902004	positive regulation of amyloid-beta formation	4/871	20/28891	0.00270297	0.0161346	0.0104628	Abcg1/Ifngr1/Apoe/Slc2a13	4	GO_BP	down
GO:0032652	regulation of interleukin-1 production	10/871	116/28891	0.00271244	0.0161543	0.0104756	Stmp1/Stat3/S1pr3/Lgals9/Gsdmd/Gstp1/Ccn1/Ccl19/Lpl/Aqp4	10	GO_BP	down
GO:0055017	cardiac muscle tissue growth	10/871	116/28891	0.00271244	0.0161543	0.0104756	Smad1/Nr3c1/Jarid2/Mapk14/Ep300/Tgfbr3/Sav1/Kcnk2/Adra1a/Zfpm2	10	GO_BP	down
GO:0044703	multi-organism reproductive process	14/871	197/28891	0.00272559	0.0162141	0.0105144	Bmpr2/Med1/Lgals9/Stat5b/Itgb4/Atr/Grn/H2-Q7/Stat5a/Ar/Pmp22/H2-Q2/Ptn/Pcsk5	14	GO_BP	down
GO:0048741	skeletal muscle fiber development	6/871	47/28891	0.00276291	0.0163989	0.0106342	Plec/Hdac4/Large1/Ski/Pmp22/Hdac9	6	GO_BP	down
GO:0060338	regulation of type I interferon-mediated signaling pathway	6/871	47/28891	0.00276291	0.0163989	0.0106342	Stat2/Adar/Irf7/Trim56/Samhd1/Zbp1	6	GO_BP	down
GO:0002934	desmosome organization	3/871	10/28891	0.00279591	0.0164272	0.0106525	Nectin1/Prkca/Dsg2	3	GO_BP	down
GO:0016479	negative regulation of transcription by RNA polymerase I	3/871	10/28891	0.00279591	0.0164272	0.0106525	Crebbp/Flna/Macroh2a2	3	GO_BP	down
GO:0035723	interleukin-15-mediated signaling pathway	3/871	10/28891	0.00279591	0.0164272	0.0106525	Stat3/Il15ra/Stat5a	3	GO_BP	down
GO:0060513	prostatic bud formation	3/871	10/28891	0.00279591	0.0164272	0.0106525	Trp63/Ar/Gli2	3	GO_BP	down
GO:0071350	cellular response to interleukin-15	3/871	10/28891	0.00279591	0.0164272	0.0106525	Stat3/Il15ra/Stat5a	3	GO_BP	down
GO:1900246	positive regulation of RIG-I signaling pathway	3/871	10/28891	0.00279591	0.0164272	0.0106525	Ankrd17/Dhx58/Ddx60	3	GO_BP	down
GO:1904396	regulation of neuromuscular junction development	3/871	10/28891	0.00279591	0.0164272	0.0106525	Mycbp2/Ptn/Colq	3	GO_BP	down
GO:1905719	protein localization to perinuclear region of cytoplasm	3/871	10/28891	0.00279591	0.0164272	0.0106525	Hook3/Hook2/Fhip1a	3	GO_BP	down
GO:2000807	regulation of synaptic vesicle clustering	3/871	10/28891	0.00279591	0.0164272	0.0106525	Bcl2l1/Nlgn1/Magi2	3	GO_BP	down
GO:0032479	regulation of type I interferon production	11/871	136/28891	0.00281153	0.0164819	0.010688	G3bp1/Tank/Crebbp/Rigi/Zbtb20/Ptpn22/Irf7/Trim56/Gbp7/Dhx58/Pola1	11	GO_BP	down
GO:0051209	release of sequestered calcium ion into cytosol	11/871	136/28891	0.00281153	0.0164819	0.010688	Flna/Plcb4/Prkce/Pde4d/Ccl19/Trpm2/Pkd2/Plce1/Myo5a/Prkd1/Slc8a1	11	GO_BP	down
GO:0010507	negative regulation of autophagy	8/871	80/28891	0.0028283	0.0165432	0.0107278	Stat3/Herc1/Ep300/Ptpn22/Nrbp2/Tspo/Rragd/Adra1a	8	GO_BP	down
GO:1903036	positive regulation of response to wounding	8/871	80/28891	0.0028283	0.0165432	0.0107278	Hif1a/Braf/Flna/Prkce/Grn/Vegfb/Igf1r/Ptn	8	GO_BP	down
GO:0002312	B cell activation involved in immune response	9/871	98/28891	0.00284257	0.0165896	0.0107578	Notch2/Rif1/Lgals8/Trp53bp1/Nbn/Plcl2/Swap70/Lgals1/Dock10	9	GO_BP	down
GO:0061515	myeloid cell development	9/871	98/28891	0.00284257	0.0165896	0.0107578	Notch2/Med1/Flna/Ep300/Lrrk1/Tjp2/Flvcr1/Fbn1/Rabgap1l	9	GO_BP	down
GO:0021915	neural tube development	14/871	198/28891	0.00285387	0.016637	0.0107886	Luzp1/Hif1a/Kdm2a/Prkacb/Stk3/Gli3/Ski/Adm/Wdpcp/Sfrp1/Plxna2/Zfp36l1/Fzd2/Gli2	14	GO_BP	down
GO:0010906	regulation of glucose metabolic process	10/871	117/28891	0.00288776	0.0167971	0.0108924	Hif1a/Nr3c1/Ncoa2/Supt20/Ppp4r3a/Ep300/Prkn/Ddb1/Pdk3/Rora	10	GO_BP	down
GO:0071482	cellular response to light stimulus	10/871	117/28891	0.00288776	0.0167971	0.0108924	Nedd4/Crebbp/N4bp1/Mapk14/Ep300/Ddb1/Pik3r1/Atr/Ptprk/Crip1	10	GO_BP	down
GO:0032212	positive regulation of telomere maintenance via telomerase	5/871	33/28891	0.0028989	0.0168246	0.0109102	Cct4/Map3k4/Atm/Atr/Prkcq	5	GO_BP	down
GO:0050654	chondroitin sulfate proteoglycan metabolic process	5/871	33/28891	0.0028989	0.0168246	0.0109102	Chst11/Ext1/Xylt1/Csgalnact1/Chsy3	5	GO_BP	down
GO:0008286	insulin receptor signaling pathway	11/871	137/28891	0.00297583	0.0172328	0.011175	Gkap1/Pik3r1/Ptprj/Stxbp4/Sos1/Prkca/Ptpra/Sik2/Prkcq/Igf1r/Grb10	11	GO_BP	down
GO:0051283	negative regulation of sequestering of calcium ion	11/871	137/28891	0.00297583	0.0172328	0.011175	Flna/Plcb4/Prkce/Pde4d/Ccl19/Trpm2/Pkd2/Plce1/Myo5a/Prkd1/Slc8a1	11	GO_BP	down
GO:0046578	regulation of Ras protein signal transduction	14/871	199/28891	0.00298707	0.0172788	0.0112048	Auts2/Notch2/Bcr/Lpar1/Dennd1a/Sos1/Abca1/Psd3/Ophn1/Apoe/Plce1/Itga3/Robo1/Adra1a	14	GO_BP	down
GO:0007033	vacuole organization	15/871	221/28891	0.00304251	0.0175801	0.0114001	Hook3/Ap3b1/Ext1/Synpo2/Hook2/Pikfyve/Rab34/Mtmr3/Fnip1/Gaa/Snx30/Fig4/Grn/Abca1/Tbc1d12	15	GO_BP	down
GO:0032413	negative regulation of ion transmembrane transporter activity	8/871	81/28891	0.00305713	0.0176373	0.0114373	Nedd4/Ank3/Prkca/Gem/Pkd2/Tcaf2/Grip1/Grp	8	GO_BP	down
GO:0006939	smooth muscle contraction	10/871	118/28891	0.003072	0.0176373	0.0114373	Cald1/Npnt/Pde4d/Kcnma1/Calcrl/Myh11/Irag1/Dock4/Adra1a/Slc8a1	10	GO_BP	down
GO:0045814	negative regulation of gene expression, epigenetic	10/871	118/28891	0.003072	0.0176373	0.0114373	Jarid2/Dyrk1a/Mbd2/Kcnq1ot1/Rif1/Macroh2a2/Hdac4/Fam172a/Trim37/Hdac9	10	GO_BP	down
GO:0106027	neuron projection organization	10/871	118/28891	0.003072	0.0176373	0.0114373	Tiam1/Mfn1/Ctnnd2/Igf1r/Camk2b/Apoe/Itga3/Nlgn1/Dock10/Pak3	10	GO_BP	down
GO:0120034	positive regulation of plasma membrane bounded cell projection assembly	10/871	118/28891	0.003072	0.0176373	0.0114373	Auts2/Fnbp1l/Pik3r1/Hdac4/Ccl19/Prkcq/Ccdc88a/Plce1/Nlgn1/Dpysl3	10	GO_BP	down
GO:0098927	vesicle-mediated transport between endosomal compartments	6/871	48/28891	0.00307848	0.0176373	0.0114373	Hook3/Stx8/Snx16/Flna/Hook2/Nf2	6	GO_BP	down
GO:0048260	positive regulation of receptor-mediated endocytosis	7/871	64/28891	0.00308611	0.0176373	0.0114373	Cd63/Tbc1d5/B2m/Ccl19/Magi2/Angpt1/C3	7	GO_BP	down
GO:0051893	regulation of focal adhesion assembly	7/871	64/28891	0.00308611	0.0176373	0.0114373	Iqgap1/Ptprj/Peak1/Ptpra/Efna5/Wdpcp/Phldb2	7	GO_BP	down
GO:0060324	face development	7/871	64/28891	0.00308611	0.0176373	0.0114373	Braf/Crebbp/Kat6a/Ep300/Ski/Zfp950/Schip1	7	GO_BP	down
GO:0090109	regulation of cell-substrate junction assembly	7/871	64/28891	0.00308611	0.0176373	0.0114373	Iqgap1/Ptprj/Peak1/Ptpra/Efna5/Wdpcp/Phldb2	7	GO_BP	down
GO:0042742	defense response to bacterium	24/871	430/28891	0.00308961	0.017638	0.0114377	H2-D1/H2-K1/Notch2/H2-T22/Ankrd17/Lgals9/Rab34/Gsdmd/Slc9a9/B2m/Serpinb9/H2-Q4/Grn/H2-M3/Gbp7/H2-Q7/Adm/Rnf213/Drosha/Ang/H2-Q6/H2-Q2/Prkd1/H2-M2	24	GO_BP	down
GO:0008277	regulation of G protein-coupled receptor signaling pathway	11/871	138/28891	0.00314778	0.017931	0.0116277	Grk5/Gprasp1/Prkca/Pde4d/Gpr27/Adm/Camk2b/Plce1/Grp/Kctd12/C3	11	GO_BP	down
GO:0046632	alpha-beta T cell differentiation	11/871	138/28891	0.00314778	0.017931	0.0116277	Ncor1/Stat3/Ap3b1/Braf/Tox/Gli3/Gadd45g/Ccl19/Rora/Psmb11/Zbtb16	11	GO_BP	down
GO:0007565	female pregnancy	13/871	179/28891	0.00315606	0.0179587	0.0116457	Bmpr2/Med1/Lgals9/Stat5b/Itgb4/Atr/Grn/H2-Q7/Stat5a/Ar/H2-Q2/Ptn/Pcsk5	13	GO_BP	down
GO:0031503	protein-containing complex localization	16/871	244/28891	0.00316991	0.0180179	0.0116841	Nedd4/Dync2h1/Nbea/Ralgapb/Ralgapa2/Lpar1/Atm/Dync2li1/Neto2/Wdpcp/Ophn1/Cep112/Nlgn1/Grip1/Magi2/Fcer2a	16	GO_BP	down
GO:0008361	regulation of cell size	15/871	222/28891	0.00317469	0.0180255	0.011689	Ttc3/Bmpr2/Ep300/Cdh4/Arhgap32/Fgf13/Kcnma1/Efna5/Apoe/Akt3/Epha7/Prkd1/Aqp4/Sema3a/Sema3e	15	GO_BP	down
GO:0007040	lysosome organization	9/871	100/28891	0.00325891	0.0183316	0.0118875	Hook3/Ap3b1/Hook2/Pikfyve/Rab34/Fnip1/Gaa/Grn/Abca1	9	GO_BP	down
GO:0045638	negative regulation of myeloid cell differentiation	9/871	100/28891	0.00325891	0.0183316	0.0118875	Stat5b/Pik3r1/Tjp2/Stat5a/Sfrp1/Fbn1/Zfp36l1/Lrrc17/Zbtb16	9	GO_BP	down
GO:0071774	response to fibroblast growth factor	9/871	100/28891	0.00325891	0.0183316	0.0118875	Iqgap1/Ext1/Sos1/Cd44/Setx/Sfrp1/Hhip/Zfp36l2/Zfp36l1	9	GO_BP	down
GO:0080171	lytic vacuole organization	9/871	100/28891	0.00325891	0.0183316	0.0118875	Hook3/Ap3b1/Hook2/Pikfyve/Rab34/Fnip1/Gaa/Grn/Abca1	9	GO_BP	down
GO:0001946	lymphangiogenesis	4/871	21/28891	0.00326012	0.0183316	0.0118875	Bmpr2/Ptpn14/Pdpn/Pkd1	4	GO_BP	down
GO:0035234	ectopic germ cell programmed cell death	4/871	21/28891	0.00326012	0.0183316	0.0118875	Ddb1/Bcl2l1/Insl6/Unc5c	4	GO_BP	down
GO:0048143	astrocyte activation	4/871	21/28891	0.00326012	0.0183316	0.0118875	Egfr/Grn/Ifngr1/Ldlr	4	GO_BP	down
GO:0051770	positive regulation of nitric-oxide synthase biosynthetic process	4/871	21/28891	0.00326012	0.0183316	0.0118875	Map2k3/Cpeb1/Map2k6/Fcer2a	4	GO_BP	down
GO:1904754	positive regulation of vascular associated smooth muscle cell migration	4/871	21/28891	0.00326012	0.0183316	0.0118875	Iqgap1/Myo5a/Dock4/Pcsk5	4	GO_BP	down
GO:0042886	amide transport	24/871	432/28891	0.00327544	0.0183773	0.0119171	Gnaq/Hif1a/Tap1/Slc38a2/Nr3c1/Oga/Prkn/Abcg1/Tiam1/Stxbp4/Prkce/Egfr/Pclo/Abca1/Gpr27/Efna5/Mcu/Trpm2/Sfrp1/Fbn1/Myo5a/Prkd1/Abcc5/Apba1	24	GO_BP	down
GO:0007189	adenylate cyclase-activating G protein-coupled receptor signaling pathway	12/871	159/28891	0.00327877	0.0183773	0.0119171	Gnaq/S1pr3/Rapgef2/Lpar1/Grk5/Abca1/Adm/Adcy9/Adgrl2/Calcrl/Adcy2/Adra1a	12	GO_BP	down
GO:0070507	regulation of microtubule cytoskeleton organization	12/871	159/28891	0.00327877	0.0183773	0.0119171	Mid1/Eml4/Dyrk1a/Cdk5rap2/Pde4dip/Patj/Fgf13/Pkd1/Togaram1/Efna5/Phldb2/Gnai1	12	GO_BP	down
GO:0032366	intracellular sterol transport	5/871	34/28891	0.0033156	0.0185638	0.0120381	Relch/Abcg1/Abca1/Ldlr/Gramd1b	5	GO_BP	down
GO:0021782	glial cell development	11/871	139/28891	0.00332761	0.0185913	0.0120559	Plec/Itgb4/Sos1/Egfr/Ski/Grn/Ifngr1/Ascl1/Pmp22/Ldlr/Vim	11	GO_BP	down
GO:0051282	regulation of sequestering of calcium ion	11/871	139/28891	0.00332761	0.0185913	0.0120559	Flna/Plcb4/Prkce/Pde4d/Ccl19/Trpm2/Pkd2/Plce1/Myo5a/Prkd1/Slc8a1	11	GO_BP	down
GO:0034248	regulation of amide metabolic process	26/871	482/28891	0.00336226	0.0187648	0.0121684	Pabpc1/Tnrc6b/Rbms3/Ddx6/Pan3/Qki/Upf3b/Impact/Dnajc1/Ep300/Abcg1/Shfl/Cpeb3/Cpeb1/Ajuba/Prkca/Pdk3/Ccn1/Ifngr1/Ang/Zfp36l2/Apoe/Zfp36l1/Cyp1b1/Slc2a13/Vim	26	GO_BP	down
GO:0006360	transcription by RNA polymerase I	7/871	65/28891	0.00337041	0.0187703	0.012172	Dek/Cavin1/Crebbp/Flna/Wdr43/Macroh2a2/Ippk	7	GO_BP	down
GO:0021872	forebrain generation of neurons	7/871	65/28891	0.00337041	0.0187703	0.012172	Gnaq/Rapgef2/B2m/Gli3/Ascl1/Sema3a/Sema3e	7	GO_BP	down
GO:0048659	smooth muscle cell proliferation	14/871	202/28891	0.00341756	0.0190127	0.0123291	Gnaq/Hif1a/Bmpr2/Stat5b/Pik3r1/Hdac4/Egfr/Prkca/Gstp1/Pde4d/Igf1r/Ang/Calcrl/Apoe	14	GO_BP	down
GO:0072009	nephron epithelium development	10/871	120/28891	0.00346855	0.0192485	0.0124821	Ext1/Notch2/Npnt/Greb1l/Gli3/Cd44/Myo1e/Hs3st3a1/Gpc3/Basp1	10	GO_BP	down
GO:0071772	response to BMP	13/871	181/28891	0.00347099	0.0192485	0.0124821	Smad1/Ext1/Notch2/Bmpr2/Crim1/Tgfbr3/Hipk2/Ski/Ccn1/Sfrp1/Itga3/Fbn1/Gpc3	13	GO_BP	down
GO:0071773	cellular response to BMP stimulus	13/871	181/28891	0.00347099	0.0192485	0.0124821	Smad1/Ext1/Notch2/Bmpr2/Crim1/Tgfbr3/Hipk2/Ski/Ccn1/Sfrp1/Itga3/Fbn1/Gpc3	13	GO_BP	down
GO:0010717	regulation of epithelial to mesenchymal transition	9/871	101/28891	0.00348432	0.0192816	0.0125035	Tgfbr3/Tiam1/Bcl9l/Pdpn/Ldlrad4/Glipr2/Sfrp1/Tgfb1i1/Phldb2	9	GO_BP	down
GO:0032611	interleukin-1 beta production	9/871	101/28891	0.00348432	0.0192816	0.0125035	Stmp1/Stat3/S1pr3/Gsdmd/Gstp1/Ccn1/Ccl19/Lpl/Aqp4	9	GO_BP	down
GO:0001889	liver development	11/871	140/28891	0.00351558	0.0194136	0.0125891	Notch2/Jarid2/Med1/Upf2/Stat5b/Tgfbr3/Cadm1/Egfr/Pkd1/Pkd2/Ptn	11	GO_BP	down
GO:0019731	antibacterial humoral response	11/871	140/28891	0.00351558	0.0194136	0.0125891	H2-D1/H2-K1/H2-T22/B2m/H2-Q4/H2-Q7/Adm/Ang/H2-Q6/H2-Q2/H2-M2	11	GO_BP	down
GO:0002090	regulation of receptor internalization	8/871	83/28891	0.00355779	0.019626	0.0127268	Nedd4/Atxn2/Cd63/Lpar1/Tbc1d5/Ophn1/Magi2/Angpt1	8	GO_BP	down
GO:0050830	defense response to Gram-positive bacterium	14/871	203/28891	0.00357183	0.0196827	0.0127636	H2-D1/H2-K1/H2-T22/Gsdmd/B2m/H2-Q4/Gbp7/H2-Q7/Adm/Drosha/Ang/H2-Q6/H2-Q2/H2-M2	14	GO_BP	down
GO:0006006	glucose metabolic process	15/871	225/28891	0.00359982	0.019816	0.0128501	Hif1a/Nr3c1/Ncoa2/Supt20/Ppp4r3a/Tpi1/Mapk14/Ep300/Prkn/Ddb1/Pik3r1/Pdk3/Rora/Pdha1/Fbn1	15	GO_BP	down
GO:0043467	regulation of generation of precursor metabolites and energy	12/871	161/28891	0.00362844	0.0199526	0.0129387	Ncor1/Hif1a/Stat3/Zbtb20/Ep300/Bnip3/Hdac4/Prkag2/Sik2/Myo5a/Cbfa2t3/Grb10	12	GO_BP	down
GO:0048008	platelet-derived growth factor receptor signaling pathway	7/871	66/28891	0.00367424	0.0201199	0.0130471	Iqgap1/Bcr/Ptprj/Zfp950/Myo1e/Cblb/Schip1	7	GO_BP	down
GO:0060038	cardiac muscle cell proliferation	7/871	66/28891	0.00367424	0.0201199	0.0130471	Smad1/Jarid2/Mapk14/Tgfbr3/Sav1/Kcnk2/Zfpm2	7	GO_BP	down
GO:0060337	type I interferon-mediated signaling pathway	7/871	66/28891	0.00367424	0.0201199	0.0130471	Stat2/Adar/Irf7/Hdac4/Trim56/Samhd1/Zbp1	7	GO_BP	down
GO:0071357	cellular response to type I interferon	7/871	66/28891	0.00367424	0.0201199	0.0130471	Stat2/Adar/Irf7/Hdac4/Trim56/Samhd1/Zbp1	7	GO_BP	down
GO:0045621	positive regulation of lymphocyte differentiation	11/871	141/28891	0.00371197	0.0202525	0.0131332	Ap3b1/Arid1b/Tox/Lgals9/Smarcc2/Stat5b/Gli3/Il15ra/Ccl19/Stat5a/Zbtb16	11	GO_BP	down
GO:0051208	sequestering of calcium ion	11/871	141/28891	0.00371197	0.0202525	0.0131332	Flna/Plcb4/Prkce/Pde4d/Ccl19/Trpm2/Pkd2/Plce1/Myo5a/Prkd1/Slc8a1	11	GO_BP	down
GO:0062207	regulation of pattern recognition receptor signaling pathway	11/871	141/28891	0.00371197	0.0202525	0.0131332	Stmp1/Znrf1/Ankrd17/Ptpn22/Pik3r1/Irf7/Dhx58/Mfhas1/Trim30a/Ddx60/Prkd1	11	GO_BP	down
GO:0032984	protein-containing complex disassembly	16/871	248/28891	0.00371393	0.0202525	0.0131332	Mical3/Mid1/Eml4/Oga/Smarcc2/Scaf8/Shfl/Bnip3/Flii/Fgf13/Shroom2/Igf1r/Setx/Nckap5/Lmod1/Swap70	16	GO_BP	down
GO:0009215	purine deoxyribonucleoside triphosphate metabolic process	3/871	11/28891	0.00375867	0.0203062	0.0131679	Oga/Adk/Samhd1	3	GO_BP	down
GO:0043482	cellular pigment accumulation	3/871	11/28891	0.00375867	0.0203062	0.0131679	Ap1g1/Cd63/Shroom2	3	GO_BP	down
GO:0045602	negative regulation of endothelial cell differentiation	3/871	11/28891	0.00375867	0.0203062	0.0131679	S1pr3/Xdh/Zeb1	3	GO_BP	down
GO:0048251	elastic fiber assembly	3/871	11/28891	0.00375867	0.0203062	0.0131679	Fbln5/Ltbp4/Myh11	3	GO_BP	down
GO:0051124	synaptic assembly at neuromuscular junction	3/871	11/28891	0.00375867	0.0203062	0.0131679	Mycbp2/Large1/Colq	3	GO_BP	down
GO:1900147	regulation of Schwann cell migration	3/871	11/28891	0.00375867	0.0203062	0.0131679	Tiam1/Ptprz1/Vim	3	GO_BP	down
GO:1904587	response to glycoprotein	3/871	11/28891	0.00375867	0.0203062	0.0131679	Man1a2/Edem1/Man1a	3	GO_BP	down
GO:2001204	regulation of osteoclast development	3/871	11/28891	0.00375867	0.0203062	0.0131679	Notch2/Tjp2/Fbn1	3	GO_BP	down
GO:2001214	positive regulation of vasculogenesis	3/871	11/28891	0.00375867	0.0203062	0.0131679	Rin2/Rapgef2/Adm	3	GO_BP	down
GO:0010574	regulation of vascular endothelial growth factor production	5/871	35/28891	0.00377368	0.0203453	0.0131933	Hif1a/Rora/Cyp1b1/Aqp4/C3	5	GO_BP	down
GO:0034110	regulation of homotypic cell-cell adhesion	5/871	35/28891	0.00377368	0.0203453	0.0131933	Ank3/Pdpn/Prkca/Prkcq/Lgals1	5	GO_BP	down
GO:0021772	olfactory bulb development	6/871	50/28891	0.00378929	0.0204084	0.0132342	Ext1/Ski/Robo1/Fut1/Sema3a/Robo2	6	GO_BP	down
GO:0002685	regulation of leukocyte migration	16/871	249/28891	0.0038613	0.0207748	0.0134718	Bcr/Cd47/Lgals9/Ptpn22/Pik3r1/Cnn2/Ptprj/Mospd2/Vegfb/Ccl19/Mmp28/Mcu/Cd99l2/Swap70/Aire/Ptn	16	GO_BP	down
GO:0009151	purine deoxyribonucleotide metabolic process	4/871	22/28891	0.00389062	0.0208255	0.0135047	Oga/Adk/Samhd1/Xdh	4	GO_BP	down
GO:0021513	spinal cord dorsal/ventral patterning	4/871	22/28891	0.00389062	0.0208255	0.0135047	Gli3/Ascl1/Gli2/Dmrt3	4	GO_BP	down
GO:0045737	positive regulation of cyclin-dependent protein serine/threonine kinase activity	4/871	22/28891	0.00389062	0.0208255	0.0135047	Ccnd3/Egfr/Pkd1/Pkd2	4	GO_BP	down
GO:0050650	chondroitin sulfate proteoglycan biosynthetic process	4/871	22/28891	0.00389062	0.0208255	0.0135047	Chst11/Xylt1/Csgalnact1/Chsy3	4	GO_BP	down
GO:2000114	regulation of establishment of cell polarity	4/871	22/28891	0.00389062	0.0208255	0.0135047	Cyrib/Flot2/Krit1/Wdpcp	4	GO_BP	down
GO:0032612	interleukin-1 production	10/871	122/28891	0.00390468	0.0208795	0.0135397	Stmp1/Stat3/S1pr3/Lgals9/Gsdmd/Gstp1/Ccn1/Ccl19/Lpl/Aqp4	10	GO_BP	down
GO:1900182	positive regulation of protein localization to nucleus	9/871	103/28891	0.00397175	0.0212165	0.0137582	Crebbp/Mapk14/Flna/Ep300/Ptpn22/Pik3r1/Gli3/Prkcq/Prkd1	9	GO_BP	down
GO:0007623	circadian rhythm	15/871	228/28891	0.0040705	0.0217097	0.0140781	Ncor1/Fbxl17/Dyrk1a/Kdm2a/Ncoa2/Mycbp2/Btrc/Ep300/Ddb1/Dpyd/Kcnma1/Setx/Rora/Cyp7b1/Nlgn1	15	GO_BP	down
GO:0015833	peptide transport	20/871	343/28891	0.00407239	0.0217097	0.0140781	Gnaq/Hif1a/Tap1/Oga/Prkn/Abcg1/Tiam1/Stxbp4/Prkce/Egfr/Pclo/Abca1/Gpr27/Efna5/Mcu/Trpm2/Sfrp1/Fbn1/Myo5a/Prkd1	20	GO_BP	down
GO:0032481	positive regulation of type I interferon production	8/871	85/28891	0.00411968	0.0218727	0.0141838	G3bp1/Tank/Rigi/Zbtb20/Ptpn22/Irf7/Trim56/Dhx58	8	GO_BP	down
GO:0035023	regulation of Rho protein signal transduction	8/871	85/28891	0.00411968	0.0218727	0.0141838	Bcr/Lpar1/Abca1/Ophn1/Apoe/Itga3/Robo1/Adra1a	8	GO_BP	down
GO:0055021	regulation of cardiac muscle tissue growth	8/871	85/28891	0.00411968	0.0218727	0.0141838	Nr3c1/Jarid2/Mapk14/Ep300/Tgfbr3/Sav1/Kcnk2/Zfpm2	8	GO_BP	down
GO:0150076	neuroinflammatory response	8/871	85/28891	0.00411968	0.0218727	0.0141838	Nr3c1/Atm/Large1/Egfr/Grn/Ifngr1/Ldlr/Myo5a	8	GO_BP	down
GO:0061008	hepaticobiliary system development	11/871	143/28891	0.004131	0.0219106	0.0142084	Notch2/Jarid2/Med1/Upf2/Stat5b/Tgfbr3/Cadm1/Egfr/Pkd1/Pkd2/Ptn	11	GO_BP	down
GO:1902041	regulation of extrinsic apoptotic signaling pathway via death domain receptors	6/871	51/28891	0.00418712	0.0221634	0.0143723	Stk3/Sp100/Trps1/Fem1b/Bcl2l1/Sfrp1	6	GO_BP	down
GO:1902743	regulation of lamellipodium organization	6/871	51/28891	0.00418712	0.0221634	0.0143723	Auts2/Pik3r1/Pdpn/Hdac4/Cd44/Plce1	6	GO_BP	down
GO:0006401	RNA catabolic process	18/871	297/28891	0.00420044	0.0222114	0.0144034	Pabpc1/Tnrc6b/Rnaset2b/Pan3/Qki/Zc3h14/Upf3b/Trnt1/Upf2/Traf5/Cpeb3/Atm/Nbas/Naf1/Ang/Zfp36l2/Zfp36l1/Vim	18	GO_BP	down
GO:0001837	epithelial to mesenchymal transition	12/871	164/28891	0.00420868	0.0222325	0.0144171	Hif1a/Ddx17/Flna/Tgfbr3/Tiam1/Bcl9l/Pdpn/Ldlrad4/Glipr2/Sfrp1/Tgfb1i1/Phldb2	12	GO_BP	down
GO:0046330	positive regulation of JNK cascade	9/871	104/28891	0.00423465	0.0223472	0.0144915	Rassf2/Stk3/Hipk2/Fgd4/Gadd45g/Map3k10/Ccl19/Mfhas1/Sh3rf3	9	GO_BP	down
GO:0001779	natural killer cell differentiation	5/871	36/28891	0.00427536	0.0225393	0.014616	Tox/Lgals9/Stat5b/Il15ra/Stat5a	5	GO_BP	down
GO:0002224	toll-like receptor signaling pathway	7/871	68/28891	0.00434383	0.0228542	0.0148203	Ap3b1/Irf7/Prkce/Mapkapk3/Rps6ka3/Mfhas1/Trim30a	7	GO_BP	down
GO:0042698	ovulation cycle	7/871	68/28891	0.00434383	0.0228542	0.0148203	Stat5b/Egfr/Pde4d/Stat5a/Igf1r/Ptn/Schip1	7	GO_BP	down
GO:0030278	regulation of ossification	11/871	144/28891	0.00435419	0.022882	0.0148383	Hif1a/Bmpr2/Mapk14/Kremen1/Ccn1/Srgn/Sfrp1/Pkdcc/Ptn/Zbtb16/Slc8a1	11	GO_BP	down
GO:0035296	regulation of tube diameter	13/871	186/28891	0.00437097	0.022882	0.0148383	Hif1a/Ext1/Bmpr2/Tgfbr3/Egfr/Adm/Kcnma1/Apoe/Irag1/Dock4/Itga1/Adra1a/Slc8a1	13	GO_BP	down
GO:0048592	eye morphogenesis	13/871	186/28891	0.00437097	0.022882	0.0148383	Nectin1/Hif1a/Stat3/Notch2/Hipk2/Tenm3/Gli3/Large1/Ski/Arl6/Shroom2/Zeb1/Ptn	13	GO_BP	down
GO:0062013	positive regulation of small molecule metabolic process	13/871	186/28891	0.00437097	0.022882	0.0148383	Hif1a/Stat3/Supt20/Ppp4r3a/Zbtb20/Prkn/Ddb1/Abcg1/Prkce/Scap/Bcl2l1/Clybl/Apoe	13	GO_BP	down
GO:0097746	blood vessel diameter maintenance	13/871	186/28891	0.00437097	0.022882	0.0148383	Hif1a/Ext1/Bmpr2/Tgfbr3/Egfr/Adm/Kcnma1/Apoe/Irag1/Dock4/Itga1/Adra1a/Slc8a1	13	GO_BP	down
GO:2000106	regulation of leukocyte apoptotic process	10/871	124/28891	0.00438307	0.0229224	0.0148645	Hif1a/Kifap3/Rapgef2/Fnip1/Bcl2l1/Cd44/Serpinb9/Ccl19/Stat5a/Prkcq	10	GO_BP	down
GO:0030879	mammary gland development	12/871	165/28891	0.00441782	0.023027	0.0149323	Hif1a/Nr3c1/Med1/Btrc/Stat5b/Gli3/Stat5a/Ar/Igf1r/Xdh/Robo1/Gli2	12	GO_BP	down
GO:0050921	positive regulation of chemotaxis	12/871	165/28891	0.00441782	0.023027	0.0149323	Bmpr2/Lpar1/Tiam1/Ptprj/Prkca/Mospd2/Vegfb/Ccl19/Mcu/Swap70/Ptn/Prkd1	12	GO_BP	down
GO:0044782	cilium organization	23/871	418/28891	0.00442044	0.023027	0.0149323	Ablim1/Nudcd3/Kifap3/Map4/Dync2h1/Flna/Asap1/Fnbp1l/Lpar1/Ttc39c/Ttll5/Arl6/Dync2li1/Ccdc88a/Togaram1/Cep126/Wdpcp/Cdc14b/Pkd2/Sdccag8/Cep162/Syne1/Pcdh15	23	GO_BP	down
GO:0034109	homotypic cell-cell adhesion	8/871	86/28891	0.00442506	0.023027	0.0149323	Ank3/Plpp3/Tjp2/Pdpn/Prkca/Prkcq/Dsg2/Lgals1	8	GO_BP	down
GO:2000107	negative regulation of leukocyte apoptotic process	8/871	86/28891	0.00442506	0.023027	0.0149323	Hif1a/Kifap3/Bcl2l1/Cd44/Serpinb9/Ccl19/Stat5a/Prkcq	8	GO_BP	down
GO:0090068	positive regulation of cell cycle process	17/871	276/28891	0.00452534	0.0235255	0.0152556	Kmt2e/Pkp4/Crebbp/Ankrd17/Med1/Brd4/Trp63/Ube2e2/Cspp1/Stxbp4/Prkce/Egfr/Igf1r/Camk2b/Cdc14b/Stox1/Plscr2	17	GO_BP	down
GO:0016331	morphogenesis of embryonic epithelium	13/871	187/28891	0.00457173	0.0237195	0.0153814	Luzp1/Hif1a/Kdm2a/Trp63/Prkacb/Stk3/Ski/Adm/Ar/Sfrp1/Tgfb1i1/Fzd2/Gli2	13	GO_BP	down
GO:0035150	regulation of tube size	13/871	187/28891	0.00457173	0.0237195	0.0153814	Hif1a/Ext1/Bmpr2/Tgfbr3/Egfr/Adm/Kcnma1/Apoe/Irag1/Dock4/Itga1/Adra1a/Slc8a1	13	GO_BP	down
GO:2001257	regulation of cation channel activity	11/871	145/28891	0.00458686	0.0237684	0.0154131	Ank3/Slmap/Ahnak/Pde4d/Fgf13/Fgf14/Gem/Pkd2/Grip1/Grp/Myo5a	11	GO_BP	down
GO:0045216	cell-cell junction organization	15/871	231/28891	0.00459022	0.0237684	0.0154131	Nectin1/Pkp4/Ext1/Flna/Nf2/Patj/Plec/Tjp2/Cdh4/Prkca/Ctnnd2/Shroom2/Dsg2/Pmp22/Cdh11	15	GO_BP	down
GO:0003177	pulmonary valve development	4/871	23/28891	0.00459874	0.0237889	0.0154264	Notch2/Bmpr2/Robo1/Robo2	4	GO_BP	down
GO:0010518	positive regulation of phospholipase activity	6/871	52/28891	0.00461496	0.0238257	0.0154503	Gnaq/Lpar1/Ccn1/Camk2b/Ang/Adra1a	6	GO_BP	down
GO:0060043	regulation of cardiac muscle cell proliferation	6/871	52/28891	0.00461496	0.0238257	0.0154503	Jarid2/Mapk14/Tgfbr3/Sav1/Kcnk2/Zfpm2	6	GO_BP	down
GO:0000956	nuclear-transcribed mRNA catabolic process	10/871	125/28891	0.00463896	0.023879	0.0154848	Pabpc1/Tnrc6b/Pan3/Upf3b/Upf2/Cpeb3/Atm/Nbas/Zfp36l2/Zfp36l1	10	GO_BP	down
GO:0019079	viral genome replication	10/871	125/28891	0.00463896	0.023879	0.0154848	Pcbp2/Top2b/N4bp1/Prkn/Srpk1/Ddb1/Adar/Shfl/Gbp7/Plscr2	10	GO_BP	down
GO:0060419	heart growth	10/871	125/28891	0.00463896	0.023879	0.0154848	Smad1/Nr3c1/Jarid2/Mapk14/Ep300/Tgfbr3/Sav1/Kcnk2/Adra1a/Zfpm2	10	GO_BP	down
GO:0048762	mesenchymal cell differentiation	16/871	254/28891	0.00467189	0.0240249	0.0155794	Hif1a/Ddx17/Ext1/Flna/Tgfbr3/Tiam1/Bcl9l/Pdpn/Fam172a/Ldlrad4/Glipr2/Sfrp1/Tgfb1i1/Phldb2/Sema3a/Sema3e	16	GO_BP	down
GO:0006611	protein export from nucleus	7/871	69/28891	0.00471131	0.0241328	0.0156494	Ptpn14/Adar/Sp100/Pkd1/Prkd1/Wipf1/Camk4	7	GO_BP	down
GO:0006940	regulation of smooth muscle contraction	7/871	69/28891	0.00471131	0.0241328	0.0156494	Cald1/Npnt/Kcnma1/Calcrl/Irag1/Dock4/Adra1a	7	GO_BP	down
GO:0048524	positive regulation of viral process	7/871	69/28891	0.00471131	0.0241328	0.0156494	Top2b/Srpk1/Ddb1/Adar/Gbp7/Lgals1/Trim30a	7	GO_BP	down
GO:1901184	regulation of ERBB signaling pathway	7/871	69/28891	0.00471131	0.0241328	0.0156494	Mvp/Ptprj/Cadm1/Egfr/Ccdc88a/Cblb/Itga1	7	GO_BP	down
GO:0043502	regulation of muscle adaptation	9/871	106/28891	0.00480104	0.024512	0.0158953	Nr3c1/Jarid2/Oga/Adk/Ep300/Tead1/Hdac4/Prkca/Adra1a	9	GO_BP	down
GO:0046928	regulation of neurotransmitter secretion	9/871	106/28891	0.00480104	0.024512	0.0158953	Slc38a2/Braf/Prkn/Bcl2l1/Prkca/Stxbp5/Mctp2/Nlgn1/Syt1	9	GO_BP	down
GO:0043524	negative regulation of neuron apoptotic process	14/871	210/28891	0.00481794	0.024512	0.0158953	Hif1a/Braf/Prkn/Hipk2/Il6st/Nrbp2/Bcl2l1/Mt1/Grn/Vegfb/Ptprz1/Apoe/Angpt1/Sema3e	14	GO_BP	down
GO:0014706	striated muscle tissue development	18/871	301/28891	0.00481887	0.024512	0.0158953	Smad1/Nr3c1/Jarid2/Med1/Mapk14/Ep300/Tgfbr3/Sav1/Plec/Large1/Kcnk2/Dsg2/Hdac9/Myh11/Angpt1/Adra1a/Slc8a1/Zfpm2	18	GO_BP	down
GO:0007549	dosage compensation	5/871	37/28891	0.0048228	0.024512	0.0158953	Jarid2/Kansl1/Macroh2a2/Lrif1/Pcgf5	5	GO_BP	down
GO:0051491	positive regulation of filopodium assembly	5/871	37/28891	0.0048228	0.024512	0.0158953	Fnbp1l/Pik3r1/Prkcq/Nlgn1/Dpysl3	5	GO_BP	down
GO:0097242	amyloid-beta clearance	5/871	37/28891	0.0048228	0.024512	0.0158953	Ifngr1/Igf1r/Apoe/Ldlr/C3	5	GO_BP	down
GO:1902882	regulation of response to oxidative stress	5/871	37/28891	0.0048228	0.024512	0.0158953	Pnpla8/Prkn/Fbln5/Trpm2/Stox1	5	GO_BP	down
GO:0009200	deoxyribonucleoside triphosphate metabolic process	3/871	12/28891	0.00490002	0.0246413	0.0159791	Oga/Adk/Samhd1	3	GO_BP	down
GO:0010572	positive regulation of platelet activation	3/871	12/28891	0.00490002	0.0246413	0.0159791	Flna/Ptprj/Pdpn	3	GO_BP	down
GO:0010624	regulation of Schwann cell proliferation	3/871	12/28891	0.00490002	0.0246413	0.0159791	Nf2/Ski/Pmp22	3	GO_BP	down
GO:0043476	pigment accumulation	3/871	12/28891	0.00490002	0.0246413	0.0159791	Ap1g1/Cd63/Shroom2	3	GO_BP	down
GO:0044557	relaxation of smooth muscle	3/871	12/28891	0.00490002	0.0246413	0.0159791	Kcnma1/Irag1/Slc8a1	3	GO_BP	down
GO:0045647	negative regulation of erythrocyte differentiation	3/871	12/28891	0.00490002	0.0246413	0.0159791	Stat5b/Stat5a/Zfp36l1	3	GO_BP	down
GO:0070669	response to interleukin-2	3/871	12/28891	0.00490002	0.0246413	0.0159791	Stat3/Stat5b/Stat5a	3	GO_BP	down
GO:0090399	replicative senescence	3/871	12/28891	0.00490002	0.0246413	0.0159791	Atm/Wrn/Atr	3	GO_BP	down
GO:0097011	cellular response to granulocyte macrophage colony-stimulating factor stimulus	3/871	12/28891	0.00490002	0.0246413	0.0159791	Etv3/Stat5a/Zfp36l2	3	GO_BP	down
GO:1901678	iron coordination entity transport	3/871	12/28891	0.00490002	0.0246413	0.0159791	Abcb7/Flvcr1/Abcc5	3	GO_BP	down
GO:1905522	negative regulation of macrophage migration	3/871	12/28891	0.00490002	0.0246413	0.0159791	Bcr/Cnn2/Mmp28	3	GO_BP	down
GO:0031331	positive regulation of cellular catabolic process	20/871	349/28891	0.00492474	0.0247419	0.0160443	Pabpc1/Tnrc6b/Hif1a/Pan3/Trim12c/Zbtb20/Prkn/Itch/Trim12a/Cpeb3/Bnip3/Atm/Snx30/Ang/Zfp36l2/Apoe/Trim30a/Zfp36l1/Ldlr/Prkd1	20	GO_BP	down
GO:0014904	myotube cell development	6/871	53/28891	0.00507412	0.0253706	0.016452	Plec/Hdac4/Large1/Ski/Pmp22/Hdac9	6	GO_BP	down
GO:0021879	forebrain neuron differentiation	6/871	53/28891	0.00507412	0.0253706	0.016452	Gnaq/Rapgef2/B2m/Ascl1/Sema3a/Sema3e	6	GO_BP	down
GO:0021988	olfactory lobe development	6/871	53/28891	0.00507412	0.0253706	0.016452	Ext1/Ski/Robo1/Fut1/Sema3a/Robo2	6	GO_BP	down
GO:0034331	cell junction maintenance	6/871	53/28891	0.00507412	0.0253706	0.016452	Cadm1/Grn/Shroom2/Ophn1/Nlgn1/Sema3a	6	GO_BP	down
GO:0090659	walking behavior	6/871	53/28891	0.00507412	0.0253706	0.016452	Hipk2/Large1/Kcnma1/Pmp22/Pcdh15/Dmrt3	6	GO_BP	down
GO:0003151	outflow tract morphogenesis	8/871	88/28891	0.00508774	0.0253902	0.0164648	Nedd4/Hif1a/Bmpr2/Tgfbr3/Robo1/Fzd2/Robo2/Zfpm2	8	GO_BP	down
GO:0051966	regulation of synaptic transmission, glutamatergic	8/871	88/28891	0.00508774	0.0253902	0.0164648	Slc38a2/Prkn/Egfr/Plppr4/Ophn1/Nlgn1/Myo5a/Syt1	8	GO_BP	down
GO:0032732	positive regulation of interleukin-1 production	7/871	70/28891	0.00510172	0.0254058	0.0164749	Stmp1/Stat3/Lgals9/Gsdmd/Ccn1/Ccl19/Lpl	7	GO_BP	down
GO:0045600	positive regulation of fat cell differentiation	7/871	70/28891	0.00510172	0.0254058	0.0164749	Mapk14/Stk3/Sav1/Sfrp1/Zfp36l1/Lpl/Zbtb16	7	GO_BP	down
GO:0001657	ureteric bud development	9/871	107/28891	0.00510543	0.0254058	0.0164749	Smad1/Npnt/Greb1l/Gli3/Cd44/Sfrp1/Hs3st3a1/Gpc3/Robo2	9	GO_BP	down
GO:0050764	regulation of phagocytosis	10/871	127/28891	0.00518592	0.0257818	0.0167187	Bcr/Cd47/Cnn2/Ptprj/Myo18a/Il15ra/Pros1/Alox15/Plscr2/C3	10	GO_BP	down
GO:0048738	cardiac muscle tissue development	17/871	280/28891	0.00521431	0.0258984	0.0167943	Smad1/Nr3c1/Jarid2/Med1/Mapk14/Ep300/Tgfbr3/Sav1/Plec/Large1/Kcnk2/Dsg2/Myh11/Angpt1/Adra1a/Slc8a1/Zfpm2	17	GO_BP	down
GO:1903311	regulation of mRNA metabolic process	18/871	304/28891	0.00533017	0.0264488	0.0171512	Pabpc1/Tnrc6b/Pan3/Rbm25/Qki/Zc3h14/Ddx17/Dyrk1a/Celf2/Srpk1/Traf5/Cpeb3/Nbas/Fam172a/Rbfox1/Zfp36l2/Zfp36l1/Vim	18	GO_BP	down
GO:0010821	regulation of mitochondrion organization	11/871	148/28891	0.00534455	0.026495	0.0171812	Hif1a/Cyrib/Ep300/Prkn/Stat2/Bnip3/Bcl2l1/Mfn1/Tspo/Mcu/Stox1	11	GO_BP	down
GO:0021511	spinal cord patterning	4/871	24/28891	0.00538861	0.026608	0.0172545	Gli3/Ascl1/Gli2/Dmrt3	4	GO_BP	down
GO:0034405	response to fluid shear stress	4/871	24/28891	0.00538861	0.026608	0.0172545	Plec/Abca1/Pkd1/Pkd2	4	GO_BP	down
GO:0042759	long-chain fatty acid biosynthetic process	4/871	24/28891	0.00538861	0.026608	0.0172545	Qki/Gstp1/Alox15/Myo5a	4	GO_BP	down
GO:0097284	hepatocyte apoptotic process	4/871	24/28891	0.00538861	0.026608	0.0172545	Stk3/Adar/Bcl2l1/Igf1r	4	GO_BP	down
GO:0071241	cellular response to inorganic substance	16/871	258/28891	0.00541594	0.026608	0.0172545	Ank3/Cpne3/Iqgap1/Braf/Cpne1/Bnip3/B2m/Mt1/Egfr/Mt2/Trpm2/Pkd2/Spidr/Nlgn1/Alox15/Syt1	16	GO_BP	down
GO:0010043	response to zinc ion	5/871	38/28891	0.00541817	0.026608	0.0172545	Mt1/Mt2/Crip1/Slc30a2/Pam	5	GO_BP	down
GO:0016233	telomere capping	5/871	38/28891	0.00541817	0.026608	0.0172545	Map3k4/Atm/Rad50/Nbn/Prkcq	5	GO_BP	down
GO:0016339	calcium-dependent cell-cell adhesion via plasma membrane cell adhesion molecules	5/871	38/28891	0.00541817	0.026608	0.0172545	Kifap3/Cdh4/Ajuba/Cdh11/Nlgn1	5	GO_BP	down
GO:0045577	regulation of B cell differentiation	5/871	38/28891	0.00541817	0.026608	0.0172545	Stat5b/Stat5a/Sfrp1/Zfp36l2/Zfp36l1	5	GO_BP	down
GO:0046825	regulation of protein export from nucleus	5/871	38/28891	0.00541817	0.026608	0.0172545	Ptpn14/Sp100/Prkd1/Wipf1/Camk4	5	GO_BP	down
GO:0006029	proteoglycan metabolic process	8/871	89/28891	0.00544626	0.0266625	0.0172898	Chst11/Ext1/Xylt1/Extl1/Hs3st3a1/Csgalnact1/Chsy3/Hs3st4	8	GO_BP	down
GO:0032410	negative regulation of transporter activity	8/871	89/28891	0.00544626	0.0266625	0.0172898	Nedd4/Ank3/Prkca/Gem/Pkd2/Tcaf2/Grip1/Grp	8	GO_BP	down
GO:1902107	positive regulation of leukocyte differentiation	14/871	213/28891	0.00544965	0.0266625	0.0172898	Ap3b1/Arid1b/Notch2/Tox/Lgals9/Smarcc2/Stat5b/Gli3/Il15ra/Prkca/Ccl19/Stat5a/Zfp36l1/Zbtb16	14	GO_BP	down
GO:1903708	positive regulation of hemopoiesis	14/871	213/28891	0.00544965	0.0266625	0.0172898	Ap3b1/Arid1b/Notch2/Tox/Lgals9/Smarcc2/Stat5b/Gli3/Il15ra/Prkca/Ccl19/Stat5a/Zfp36l1/Zbtb16	14	GO_BP	down
GO:0032496	response to lipopolysaccharide	22/871	401/28891	0.00547308	0.0267522	0.017348	Bcr/Mapk14/Lgals9/Trim12c/Stat5b/Ptpn22/Trim12a/Cxcl16/Prkce/B2m/Map2k3/Prpf8/Prkca/Abca1/Gstp1/Pde4d/Mapkapk3/Adm/Rps6ka3/Trim30a/Plscr2/Vim	22	GO_BP	down
GO:0002790	peptide secretion	19/871	329/28891	0.00556429	0.0270794	0.0175602	Gnaq/Hif1a/Oga/Prkn/Abcg1/Tiam1/Stxbp4/Prkce/Egfr/Pclo/Abca1/Gpr27/Efna5/Mcu/Trpm2/Sfrp1/Fbn1/Myo5a/Prkd1	19	GO_BP	down
GO:0003179	heart valve morphogenesis	6/871	54/28891	0.0055659	0.0270794	0.0175602	Notch2/Bmpr2/Ccn1/Robo1/Robo2/Zfpm2	6	GO_BP	down
GO:0032355	response to estradiol	6/871	54/28891	0.0055659	0.0270794	0.0175602	Stat3/Stat5b/Egfr/Prkca/Grn/Ghr	6	GO_BP	down
GO:0048546	digestive tract morphogenesis	6/871	54/28891	0.0055659	0.0270794	0.0175602	Hif1a/Trp63/Gli3/Egfr/Sfrp1/Gli2	6	GO_BP	down
GO:0051289	protein homotetramerization	6/871	54/28891	0.0055659	0.0270794	0.0175602	Acot13/B2m/Samhd1/Trpm2/Pkd2/Aqp4	6	GO_BP	down
GO:0019318	hexose metabolic process	16/871	259/28891	0.00561624	0.027282	0.0176915	Hif1a/Nr3c1/Ncoa2/Supt20/Ppp4r3a/Tpi1/Mapk14/Ep300/Galk2/Prkn/Ddb1/Pik3r1/Pdk3/Rora/Pdha1/Fbn1	16	GO_BP	down
GO:0090277	positive regulation of peptide hormone secretion	11/871	149/28891	0.00561795	0.027282	0.0176915	Gnaq/Hif1a/Oga/Prkn/Abcg1/Prkce/Egfr/Gpr27/Mcu/Trpm2/Prkd1	11	GO_BP	down
GO:0051260	protein homooligomerization	13/871	192/28891	0.00568966	0.0276046	0.0179007	Kctd1/Acot13/Trp53bp1/Gsdmd/B2m/Mospd2/Samhd1/Clybl/Trpm2/Pkd2/Steap4/Aqp4/Kctd12	13	GO_BP	down
GO:0009953	dorsal/ventral pattern formation	9/871	109/28891	0.00575892	0.0279148	0.0181019	Dync2h1/Prkacb/Map3k4/Gli3/Ascl1/Sfrp1/Hhip/Gli2/Dmrt3	9	GO_BP	down
GO:0046879	hormone secretion	22/871	403/28891	0.00579229	0.0280505	0.0181899	Gnaq/Hif1a/Oga/Prkn/Abcg1/Tiam1/Stxbp4/Prkce/Egfr/Pclo/Gpr27/Tspo/Efna5/Mcu/Trpm2/Sfrp1/Fbn1/Ltbp4/Myo5a/Nell2/Prkd1/Scg5	22	GO_BP	down
GO:1900076	regulation of cellular response to insulin stimulus	8/871	90/28891	0.00582373	0.0281767	0.0182717	Ncoa2/Gkap1/Ptprj/Prkca/Prkcq/Myo5a/Lpl/Grb10	8	GO_BP	down
GO:2001236	regulation of extrinsic apoptotic signaling pathway	12/871	171/28891	0.00585373	0.0282957	0.0183489	Eya4/Stk3/Sp100/Trps1/Fem1b/Bcl2l1/Itga6/Wwox/Gstp1/Ar/Sfrp1/Sgk3	12	GO_BP	down
GO:0045165	cell fate commitment	18/871	307/28891	0.00588503	0.0284208	0.01843	Rtf1/Stat3/Smad1/Ext1/Braf/Notch2/Mga/Tox/Pdpn/Gli3/Fgf13/Ascl1/Ar/Sfrp1/Tgfb1i1/Zfp521/Gli2/Dmrt3	18	GO_BP	down
GO:0031623	receptor internalization	11/871	150/28891	0.00590225	0.0284462	0.0184465	Nedd4/Atxn2/Cd63/Itch/Lpar1/Tbc1d5/Adm/Ophn1/Calcrl/Magi2/Angpt1	11	GO_BP	down
GO:0007519	skeletal muscle tissue development	14/871	215/28891	0.0059066	0.0284462	0.0184465	Ddx17/Mapk14/Ep300/Mbnl1/Plec/Bcl9l/Hdac4/Large1/Ski/Msc/Rbfox1/Pmp22/Hivep3/Hdac9	14	GO_BP	down
GO:0048771	tissue remodeling	14/871	215/28891	0.0059066	0.0284462	0.0184465	Hif1a/Ext1/Notch2/Bcr/Rassf2/Bmpr2/Flna/Tgfbr3/Lrrk1/Egfr/Prkca/Stat5a/Sfrp1/Ptn	14	GO_BP	down
GO:0051650	establishment of vesicle localization	13/871	193/28891	0.00593744	0.0285685	0.0185258	Ap3b1/Exoc4/Gbf1/Exoc6b/Fnbp1l/Prkn/Pclo/Myo1e/Shroom2/Trak2/Nlgn1/Myo5a/Dync1i1	13	GO_BP	down
GO:0034394	protein localization to cell surface	7/871	72/28891	0.0059548	0.0285994	0.0185459	Ap3b1/Gbf1/Flna/Fbln5/Ptprk/Astn2/Angpt1	7	GO_BP	down
GO:0042733	embryonic digit morphogenesis	7/871	72/28891	0.0059548	0.0285994	0.0185459	Gnaq/Chst11/Gli3/Flvcr1/Wdpcp/Gli2/Zbtb16	7	GO_BP	down
GO:0010573	vascular endothelial growth factor production	5/871	39/28891	0.00606362	0.0289099	0.0187472	Hif1a/Rora/Cyp1b1/Aqp4/C3	5	GO_BP	down
GO:0014002	astrocyte development	5/871	39/28891	0.00606362	0.0289099	0.0187472	Egfr/Grn/Ifngr1/Ldlr/Vim	5	GO_BP	down
GO:0032438	melanosome organization	5/871	39/28891	0.00606362	0.0289099	0.0187472	Ap3b1/Ap1g1/Pikfyve/Shroom2/Apoe	5	GO_BP	down
GO:0046329	negative regulation of JNK cascade	5/871	39/28891	0.00606362	0.0289099	0.0187472	Ncor1/Ptpn22/Itch/Gstp1/Sfrp1	5	GO_BP	down
GO:0050931	pigment cell differentiation	5/871	39/28891	0.00606362	0.0289099	0.0187472	Gnaq/Ap1g1/Cd63/Gli3/Myo5a	5	GO_BP	down
GO:0071320	cellular response to cAMP	5/871	39/28891	0.00606362	0.0289099	0.0187472	Rapgef2/Pde4d/Pkd2/Zfp36l1/Slc8a1	5	GO_BP	down
GO:0071402	cellular response to lipoprotein particle stimulus	5/871	39/28891	0.00606362	0.0289099	0.0187472	Abcg1/Hmgcs1/Apoe/Ldlr/Lpl	5	GO_BP	down
GO:1904738	vascular associated smooth muscle cell migration	5/871	39/28891	0.00606362	0.0289099	0.0187472	Iqgap1/Myo5a/Dock4/Pcsk5/Grb10	5	GO_BP	down
GO:0030048	actin filament-based movement	10/871	130/28891	0.00609959	0.0290466	0.0188358	Flna/Fnbp1l/Pdpn/Frmd6/Pde4d/Myo1e/Fgf13/Dsg2/Myo5a/Wipf1	10	GO_BP	down
GO:0072163	mesonephric epithelium development	9/871	110/28891	0.00610894	0.0290466	0.0188358	Smad1/Npnt/Greb1l/Gli3/Cd44/Sfrp1/Hs3st3a1/Gpc3/Robo2	9	GO_BP	down
GO:0072164	mesonephric tubule development	9/871	110/28891	0.00610894	0.0290466	0.0188358	Smad1/Npnt/Greb1l/Gli3/Cd44/Sfrp1/Hs3st3a1/Gpc3/Robo2	9	GO_BP	down
GO:0097696	receptor signaling pathway via STAT	14/871	216/28891	0.00614632	0.0291907	0.0189293	Stat3/Stat5b/Ep300/Nf2/Stat2/Il6st/Il15ra/Gbp7/Pkd1/Stat5a/Mgat5/Pkd2/Ghr/Cyp1b1	14	GO_BP	down
GO:0002088	lens development in camera-type eye	8/871	91/28891	0.00622076	0.0291907	0.0189293	Nectin1/Med1/Pds5a/Nf2/Hipk2/Ski/Shroom2/Vim	8	GO_BP	down
GO:0043242	negative regulation of protein-containing complex disassembly	8/871	91/28891	0.00622076	0.0291907	0.0189293	Mid1/Eml4/Scaf8/Flii/Fgf13/Shroom2/Lmod1/Swap70	8	GO_BP	down
GO:0045665	negative regulation of neuron differentiation	8/871	91/28891	0.00622076	0.0291907	0.0189293	Ttc3/Ddx6/Med1/Cdk5rap2/B2m/Gli3/Nbn/Ascl1	8	GO_BP	down
GO:0061178	regulation of insulin secretion involved in cellular response to glucose stimulus	8/871	91/28891	0.00622076	0.0291907	0.0189293	Hif1a/Prkn/Abcg1/Tiam1/Stxbp4/Prkce/Gpr27/Efna5	8	GO_BP	down
GO:0014010	Schwann cell proliferation	3/871	13/28891	0.00622846	0.0291907	0.0189293	Nf2/Ski/Pmp22	3	GO_BP	down
GO:0032354	response to follicle-stimulating hormone	3/871	13/28891	0.00622846	0.0291907	0.0189293	Tgfbr3/Pde4d/Efna5	3	GO_BP	down
GO:0035066	positive regulation of histone acetylation	3/871	13/28891	0.00622846	0.0291907	0.0189293	Auts2/Dek/Ep300	3	GO_BP	down
GO:0048537	mucosa-associated lymphoid tissue development	3/871	13/28891	0.00622846	0.0291907	0.0189293	Tox/Stat5b/Stat5a	3	GO_BP	down
GO:0048541	Peyer's patch development	3/871	13/28891	0.00622846	0.0291907	0.0189293	Tox/Stat5b/Stat5a	3	GO_BP	down
GO:0060179	male mating behavior	3/871	13/28891	0.00622846	0.0291907	0.0189293	Hdac4/Grn/Ar	3	GO_BP	down
GO:0060213	positive regulation of nuclear-transcribed mRNA poly(A) tail shortening	3/871	13/28891	0.00622846	0.0291907	0.0189293	Pabpc1/Tnrc6b/Cpeb3	3	GO_BP	down
GO:0060601	lateral sprouting from an epithelium	3/871	13/28891	0.00622846	0.0291907	0.0189293	Trp63/Ar/Gli2	3	GO_BP	down
GO:0097012	response to granulocyte macrophage colony-stimulating factor	3/871	13/28891	0.00622846	0.0291907	0.0189293	Etv3/Stat5a/Zfp36l2	3	GO_BP	down
GO:0140059	dendrite arborization	3/871	13/28891	0.00622846	0.0291907	0.0189293	Grip1/Ptn/Sema3a	3	GO_BP	down
GO:1901620	regulation of smoothened signaling pathway involved in dorsal/ventral neural tube patterning	3/871	13/28891	0.00622846	0.0291907	0.0189293	Prkacb/Gli3/Gli2	3	GO_BP	down
GO:0035855	megakaryocyte development	4/871	25/28891	0.00626422	0.029332	0.0190209	Med1/Flna/Ep300/Rabgap1l	4	GO_BP	down
GO:0061035	regulation of cartilage development	7/871	73/28891	0.00641922	0.030031	0.0194742	Smad1/Trps1/Gli3/Ccn1/Pkdcc/Gli2/Zbtb16	7	GO_BP	down
GO:0000302	response to reactive oxygen species	13/871	195/28891	0.00645878	0.0301621	0.0195592	Hif1a/Ep300/Bnip3/Atm/Fbln5/Egfr/Ptprk/Prkca/Gstp1/Setx/Trpm2/Cyp1b1/Slc8a1	13	GO_BP	down
GO:0071229	cellular response to acid chemical	13/871	195/28891	0.00645878	0.0301621	0.0195592	Capn2/Col4a1/Ep300/Prkn/Plec/Cpeb3/Bcl2l1/Cpeb1/Egfr/Rragd/Pkd2/Col6a1/Zeb1	13	GO_BP	down
GO:0008202	steroid metabolic process	20/871	358/28891	0.00647497	0.0302108	0.0195907	Nr3c1/Med1/Stat5b/Abcg1/Ywhah/Scap/Abca1/Stat5a/Adm/Hmgcs1/Kcnma1/Tspo/Igf1r/Rora/Apoe/Pmp22/Cyp7b1/Ldlr/Cyp1b1/Schip1	20	GO_BP	down
GO:0010827	regulation of glucose transmembrane transport	8/871	92/28891	0.006638	0.0308195	0.0199855	Braf/Mapk14/Oga/Stxbp4/Prkca/Gpc3/C3/Grb10	8	GO_BP	down
GO:0045069	regulation of viral genome replication	8/871	92/28891	0.006638	0.0308195	0.0199855	Top2b/N4bp1/Srpk1/Ddb1/Adar/Shfl/Gbp7/Plscr2	8	GO_BP	down
GO:0051881	regulation of mitochondrial membrane potential	8/871	92/28891	0.006638	0.0308195	0.0199855	Oga/Prkn/Bnip3/Prkce/Bcl2l1/Mfn1/Tspo/Stox1	8	GO_BP	down
GO:0060420	regulation of heart growth	8/871	92/28891	0.006638	0.0308195	0.0199855	Nr3c1/Jarid2/Mapk14/Ep300/Tgfbr3/Sav1/Kcnk2/Zfpm2	8	GO_BP	down
GO:0061333	renal tubule morphogenesis	8/871	92/28891	0.006638	0.0308195	0.0199855	Col4a1/Npnt/Greb1l/Gli3/Cd44/Pkd2/Hs3st3a1/Gpc3	8	GO_BP	down
GO:0001101	response to acid chemical	14/871	218/28891	0.00664913	0.0308195	0.0199855	Capn2/Col4a1/Ep300/Prkn/Plec/Cpeb3/Bcl2l1/Cpeb1/Egfr/Igf1r/Rragd/Pkd2/Col6a1/Zeb1	14	GO_BP	down
GO:0006111	regulation of gluconeogenesis	6/871	56/28891	0.00665253	0.0308195	0.0199855	Hif1a/Nr3c1/Supt20/Ppp4r3a/Ep300/Ddb1	6	GO_BP	down
GO:0044088	regulation of vacuole organization	6/871	56/28891	0.00665253	0.0308195	0.0199855	Pikfyve/Mtmr3/Fnip1/Snx30/Grn/Tbc1d12	6	GO_BP	down
GO:0048562	embryonic organ morphogenesis	19/871	335/28891	0.00670846	0.0310298	0.0201218	Eya4/Hif1a/Chst11/Notch2/Bcr/Kdm2a/Tead1/Tshz1/Hipk2/Ttc39c/Gli3/Flvcr1/Wdpcp/Pkd2/Stox1/Pcdh15/Zeb1/Fzd2/Gli2	19	GO_BP	down
GO:0090276	regulation of peptide hormone secretion	16/871	264/28891	0.00670978	0.0310298	0.0201218	Gnaq/Hif1a/Oga/Prkn/Abcg1/Tiam1/Stxbp4/Prkce/Egfr/Gpr27/Efna5/Mcu/Trpm2/Sfrp1/Fbn1/Prkd1	16	GO_BP	down
GO:0048753	pigment granule organization	5/871	40/28891	0.00676125	0.0312402	0.0202583	Ap3b1/Ap1g1/Pikfyve/Shroom2/Apoe	5	GO_BP	down
GO:0042476	odontogenesis	10/871	132/28891	0.00677511	0.0312491	0.0202641	Nectin1/Trp63/Nf2/Itga6/Gli3/Edaradd/Myo5a/Eda/Gli2/Dmrt3	10	GO_BP	down
GO:0045931	positive regulation of mitotic cell cycle	10/871	132/28891	0.00677511	0.0312491	0.0202641	Kmt2e/Crebbp/Ankrd17/Brd4/Ube2e2/Stat5b/Egfr/Prkca/Stat5a/Stox1	10	GO_BP	down
GO:0001936	regulation of endothelial cell proliferation	11/871	153/28891	0.0068235	0.0313893	0.020355	Stat3/Krit1/Prkca/Vegfb/Stat5a/Ang/Apoe/Xdh/Akt3/Fut1/Prkd1	11	GO_BP	down
GO:0002793	positive regulation of peptide secretion	11/871	153/28891	0.0068235	0.0313893	0.020355	Gnaq/Hif1a/Oga/Prkn/Abcg1/Prkce/Egfr/Gpr27/Mcu/Trpm2/Prkd1	11	GO_BP	down
GO:0072331	signal transduction by p53 class mediator	11/871	153/28891	0.0068235	0.0313893	0.020355	Dyrk1a/Trp63/Hint1/Ep300/Prkn/Hipk2/Sp100/Atm/Atr/Wwox/Cd44	11	GO_BP	down
GO:0061326	renal tubule development	9/871	112/28891	0.00685791	0.0314922	0.0204217	Notch2/Col4a1/Npnt/Greb1l/Gli3/Cd44/Pkd2/Hs3st3a1/Gpc3	9	GO_BP	down
GO:0072676	lymphocyte migration	9/871	112/28891	0.00685791	0.0314922	0.0204217	Ext1/Lgals9/Cxcl16/Plec/Cadm1/Ccl19/Cd99l2/Cyp7b1/Aire	9	GO_BP	down
GO:0008333	endosome to lysosome transport	7/871	74/28891	0.00691007	0.0317039	0.020559	Hook3/Stx8/Snx16/Hook2/Vps41/Gprasp1/Trak2	7	GO_BP	down
GO:0007188	adenylate cyclase-modulating G protein-coupled receptor signaling pathway	15/871	242/28891	0.00697586	0.0319778	0.0207366	Gnaq/S1pr3/Rapgef2/Flna/Prkacb/Lpar1/Grk5/Abca1/Adm/Adcy9/Adgrl2/Calcrl/Adcy2/Gnai1/Adra1a	15	GO_BP	down
GO:0001935	endothelial cell proliferation	12/871	175/28891	0.00700067	0.0320634	0.0207921	Stat3/Bmpr2/Krit1/Prkca/Vegfb/Stat5a/Ang/Apoe/Xdh/Akt3/Fut1/Prkd1	12	GO_BP	down
GO:0014015	positive regulation of gliogenesis	8/871	93/28891	0.00707606	0.0323804	0.0209977	Qki/Il6st/Egfr/Ptpra/Tspo/Ptprz1/Ptn/Vim	8	GO_BP	down
GO:0046883	regulation of hormone secretion	19/871	337/28891	0.00712988	0.0325982	0.0211389	Gnaq/Hif1a/Oga/Prkn/Abcg1/Tiam1/Stxbp4/Prkce/Egfr/Gpr27/Tspo/Efna5/Mcu/Trpm2/Sfrp1/Fbn1/Nell2/Prkd1/Scg5	19	GO_BP	down
GO:0030073	insulin secretion	16/871	266/28891	0.00719256	0.0327384	0.0212299	Gnaq/Hif1a/Oga/Prkn/Abcg1/Tiam1/Stxbp4/Prkce/Pclo/Gpr27/Efna5/Mcu/Trpm2/Sfrp1/Fbn1/Myo5a	16	GO_BP	down
GO:0009914	hormone transport	22/871	411/28891	0.00722652	0.0327384	0.0212299	Gnaq/Hif1a/Oga/Prkn/Abcg1/Tiam1/Stxbp4/Prkce/Egfr/Pclo/Gpr27/Tspo/Efna5/Mcu/Trpm2/Sfrp1/Fbn1/Ltbp4/Myo5a/Nell2/Prkd1/Scg5	22	GO_BP	down
GO:0007202	activation of phospholipase C activity	4/871	26/28891	0.00722934	0.0327384	0.0212299	Gnaq/Lpar1/Ang/Adra1a	4	GO_BP	down
GO:0031954	positive regulation of protein autophosphorylation	4/871	26/28891	0.00722934	0.0327384	0.0212299	Iqgap1/Rassf2/Rad50/Nbn	4	GO_BP	down
GO:0032288	myelin assembly	4/871	26/28891	0.00722934	0.0327384	0.0212299	Pikfyve/Itgb4/Fig4/Pmp22	4	GO_BP	down
GO:0034143	regulation of toll-like receptor 4 signaling pathway	4/871	26/28891	0.00722934	0.0327384	0.0212299	Znrf1/Ptpn22/Pik3r1/Mfhas1	4	GO_BP	down
GO:0035357	peroxisome proliferator activated receptor signaling pathway	4/871	26/28891	0.00722934	0.0327384	0.0212299	Ncoa2/Med1/Pdk3/Alox15	4	GO_BP	down
GO:0038083	peptidyl-tyrosine autophosphorylation	4/871	26/28891	0.00722934	0.0327384	0.0212299	Iqgap1/Dyrk1a/Egfr/Igf1r	4	GO_BP	down
GO:0039529	RIG-I signaling pathway	4/871	26/28891	0.00722934	0.0327384	0.0212299	Rigi/Ankrd17/Dhx58/Ddx60	4	GO_BP	down
GO:0045722	positive regulation of gluconeogenesis	4/871	26/28891	0.00722934	0.0327384	0.0212299	Hif1a/Supt20/Ppp4r3a/Ddb1	4	GO_BP	down
GO:2000050	regulation of non-canonical Wnt signaling pathway	4/871	26/28891	0.00722934	0.0327384	0.0212299	Tiam1/Rnf213/Sfrp1/Gpc3	4	GO_BP	down
GO:0000381	regulation of alternative mRNA splicing, via spliceosome	6/871	57/28891	0.00724997	0.0327751	0.0212537	Rbm25/Ddx17/Dyrk1a/Celf2/Fam172a/Rbfox1	6	GO_BP	down
GO:0050732	negative regulation of peptidyl-tyrosine phosphorylation	6/871	57/28891	0.00724997	0.0327751	0.0212537	Sh3bp5/Mvp/Nf2/Lrrk1/Cblb/Sfrp1	6	GO_BP	down
GO:0060271	cilium assembly	21/871	387/28891	0.00737735	0.0333222	0.0216084	Ablim1/Nudcd3/Map4/Dync2h1/Flna/Asap1/Fnbp1l/Lpar1/Ttc39c/Ttll5/Arl6/Dync2li1/Ccdc88a/Togaram1/Cep126/Wdpcp/Cdc14b/Sdccag8/Cep162/Syne1/Pcdh15	21	GO_BP	down
GO:0007585	respiratory gaseous exchange by respiratory system	7/871	75/28891	0.0074282	0.0334653	0.0217012	Ap3b1/Chst11/Man1a2/Gaa/Hipk2/Nlgn1/Grp	7	GO_BP	down
GO:0010833	telomere maintenance via telomere lengthening	7/871	75/28891	0.0074282	0.0334653	0.0217012	Cct4/Map3k4/Atm/Atr/Rad50/Naf1/Prkcq	7	GO_BP	down
GO:0043113	receptor clustering	7/871	75/28891	0.0074282	0.0334653	0.0217012	Lgals9/Flna/Apoe/Nlgn1/Magi2/Ptn/Colq	7	GO_BP	down
GO:0050796	regulation of insulin secretion	14/871	221/28891	0.00746437	0.0335993	0.0217881	Gnaq/Hif1a/Oga/Prkn/Abcg1/Tiam1/Stxbp4/Prkce/Gpr27/Efna5/Mcu/Trpm2/Sfrp1/Fbn1	14	GO_BP	down
GO:0002718	regulation of cytokine production involved in immune response	11/871	155/28891	0.00749759	0.0337198	0.0218663	H2-D1/H2-K1/H2-T22/Rigi/B2m/H2-Q4/H2-Q7/H2-Q6/H2-Q2/Angpt1/H2-M2	11	GO_BP	down
GO:0010092	specification of animal organ identity	5/871	41/28891	0.00751313	0.0337317	0.021874	Ext1/Gli3/Ar/Robo1/Robo2	5	GO_BP	down
GO:0045879	negative regulation of smoothened signaling pathway	5/871	41/28891	0.00751313	0.0337317	0.021874	Prkacb/Gli3/Hhip/Gpc3/Gli2	5	GO_BP	down
GO:0035050	embryonic heart tube development	8/871	94/28891	0.00753558	0.0338036	0.0219206	Hif1a/Notch2/Kdm2a/Med1/Tead1/Pkd2/Invs/Slc8a1	8	GO_BP	down
GO:0006486	protein glycosylation	13/871	199/28891	0.00761036	0.0340515	0.0220813	Ext1/Oga/Uggt1/Mgat4b/Galnt17/Large1/Vegfb/Mgat5/Tmtc2/Extl1/Trak2/Gxylt2/Fut1	13	GO_BP	down
GO:0043413	macromolecule glycosylation	13/871	199/28891	0.00761036	0.0340515	0.0220813	Ext1/Oga/Uggt1/Mgat4b/Galnt17/Large1/Vegfb/Mgat5/Tmtc2/Extl1/Trak2/Gxylt2/Fut1	13	GO_BP	down
GO:0071674	mononuclear cell migration	13/871	199/28891	0.00761036	0.0340515	0.0220813	Ext1/Cd47/Lgals9/Cxcl16/Ptprj/Plec/Cadm1/Mospd2/Ccl19/Cd99l2/Trpm2/Cyp7b1/Aire	13	GO_BP	down
GO:1903522	regulation of blood circulation	16/871	268/28891	0.00770287	0.034436	0.0223307	Hif1a/Bmpr2/Flna/Pik3r1/Gaa/Hdac4/Egfr/Prkca/Pde4d/Fgf13/Adm/Dsg2/Dock4/Sema3a/Adra1a/Slc8a1	16	GO_BP	down
GO:0002517	T cell tolerance induction	3/871	14/28891	0.00775126	0.0344464	0.0223374	Itch/Cblb/Aire	3	GO_BP	down
GO:0010635	regulation of mitochondrial fusion	3/871	14/28891	0.00775126	0.0344464	0.0223374	Prkn/Bnip3/Mfn1	3	GO_BP	down
GO:0032717	negative regulation of interleukin-8 production	3/871	14/28891	0.00775126	0.0344464	0.0223374	Otud7b/Anxa4/Ptpn22	3	GO_BP	down
GO:0043589	skin morphogenesis	3/871	14/28891	0.00775126	0.0344464	0.0223374	Trp63/Itgb4/Itga6	3	GO_BP	down
GO:0060368	regulation of Fc receptor mediated stimulatory signaling pathway	3/871	14/28891	0.00775126	0.0344464	0.0223374	Cd47/Ptprj/Plscr2	3	GO_BP	down
GO:0098528	skeletal muscle fiber differentiation	3/871	14/28891	0.00775126	0.0344464	0.0223374	Hdac4/Large1/Hdac9	3	GO_BP	down
GO:2001046	positive regulation of integrin-mediated signaling pathway	3/871	14/28891	0.00775126	0.0344464	0.0223374	Flna/Cd63/Pcsk5	3	GO_BP	down
GO:0034655	nucleobase-containing compound catabolic process	22/871	414/28891	0.00783417	0.0347724	0.0225488	Pabpc1/Tnrc6b/Rnaset2b/Pan3/Qki/Zc3h14/Upf3b/Trnt1/Hint1/Upf2/Traf5/Dpyd/Cpeb3/Atm/Nbas/Naf1/Samhd1/Ang/Zfp36l2/Xdh/Zfp36l1/Vim	22	GO_BP	down
GO:0062197	cellular response to chemical stress	18/871	316/28891	0.0078379	0.0347724	0.0225488	Hif1a/Pnpla8/Ep300/Prkn/Plec/Bnip3/Atm/Fbln5/Egfr/Ptprk/Setx/Trpm2/Pkd2/Stox1/Zfp36l1/Prkd1/Cyp1b1/Slc8a1	18	GO_BP	down
GO:0032731	positive regulation of interleukin-1 beta production	6/871	58/28891	0.00788522	0.0348641	0.0226083	Stmp1/Stat3/Gsdmd/Ccn1/Ccl19/Lpl	6	GO_BP	down
GO:0050922	negative regulation of chemotaxis	6/871	58/28891	0.00788522	0.0348641	0.0226083	Gstp1/Mmp28/Robo1/Sema3a/Robo2/Sema3e	6	GO_BP	down
GO:0051489	regulation of filopodium assembly	6/871	58/28891	0.00788522	0.0348641	0.0226083	Fnbp1l/Pik3r1/Prkcq/Trpm2/Nlgn1/Dpysl3	6	GO_BP	down
GO:0051496	positive regulation of stress fiber assembly	6/871	58/28891	0.00788522	0.0348641	0.0226083	Braf/Cd47/Nf2/Lpar1/Prkcq/Ccdc88a	6	GO_BP	down
GO:0034765	regulation of monoatomic ion transmembrane transport	25/871	490/28891	0.00790068	0.034903	0.0226335	Nedd4/Ank3/Ubr3/Fbxo11/Slmap/Oga/Flna/Ahnak/Cd63/Ptpn22/Ywhah/Prkce/Prkca/Pde4d/Fgf13/Fgf14/Gem/Kcnma1/Pkd2/Tcaf2/Grip1/Grp/Myo5a/Prkd1/Slc8a1	25	GO_BP	down
GO:0002791	regulation of peptide secretion	16/871	269/28891	0.00796868	0.0350811	0.022749	Gnaq/Hif1a/Oga/Prkn/Abcg1/Tiam1/Stxbp4/Prkce/Egfr/Gpr27/Efna5/Mcu/Trpm2/Sfrp1/Fbn1/Prkd1	16	GO_BP	down
GO:0000380	alternative mRNA splicing, via spliceosome	7/871	76/28891	0.00797451	0.0350811	0.022749	Rbm25/Ddx17/Dyrk1a/Mbnl1/Celf2/Fam172a/Rbfox1	7	GO_BP	down
GO:0048645	animal organ formation	7/871	76/28891	0.00797451	0.0350811	0.022749	Ext1/Trp63/Gli3/Ar/Robo1/Gli2/Robo2	7	GO_BP	down
GO:0055002	striated muscle cell development	7/871	76/28891	0.00797451	0.0350811	0.022749	Ep300/Plec/Flii/Large1/Myl9/Lmod1/Prkd1	7	GO_BP	down
GO:0060997	dendritic spine morphogenesis	7/871	76/28891	0.00797451	0.0350811	0.022749	Tiam1/Mfn1/Ctnnd2/Camk2b/Nlgn1/Dock10/Pak3	7	GO_BP	down
GO:0002260	lymphocyte homeostasis	8/871	95/28891	0.00801719	0.0352393	0.0228516	Hif1a/Stat5b/Sos1/Wdr37/Cd44/Il20rb/Stat5a/Dock10	8	GO_BP	down
GO:0051656	establishment of organelle localization	25/871	491/28891	0.00809499	0.0355514	0.023054	Hook3/Hif1a/Ap3b1/Exoc4/Eml4/Pard3b/Gbf1/Map4/Cdk5rap2/Exoc6b/Fnbp1l/Prkn/Atm/Pclo/Myo1e/Gem/Shroom2/Arhgap21/Trak2/Nlgn1/Syne1/Grp/Myo5a/Dync1i1/Clmn	25	GO_BP	down
GO:0032024	positive regulation of insulin secretion	9/871	115/28891	0.00811079	0.0355611	0.0230603	Gnaq/Hif1a/Oga/Prkn/Abcg1/Prkce/Gpr27/Mcu/Trpm2	9	GO_BP	down
GO:0048661	positive regulation of smooth muscle cell proliferation	9/871	115/28891	0.00811079	0.0355611	0.0230603	Gnaq/Hif1a/Stat5b/Hdac4/Egfr/Prkca/Pde4d/Igf1r/Calcrl	9	GO_BP	down
GO:0071887	leukocyte apoptotic process	11/871	157/28891	0.00822245	0.0360046	0.0233478	Hif1a/Kifap3/Rapgef2/Fnip1/Bcl2l1/Gli3/Cd44/Serpinb9/Ccl19/Stat5a/Prkcq	11	GO_BP	down
GO:0097553	calcium ion transmembrane import into cytosol	13/871	201/28891	0.00824393	0.0360046	0.0233478	Oga/Flna/Plcb4/Prkce/Pde4d/Ccl19/Trpm2/Pkd2/Plce1/Myo5a/Prkd1/Adra1a/Slc8a1	13	GO_BP	down
GO:0000289	nuclear-transcribed mRNA poly(A) tail shortening	4/871	27/28891	0.00828758	0.0360046	0.0233478	Pabpc1/Tnrc6b/Pan3/Cpeb3	4	GO_BP	down
GO:0003148	outflow tract septum morphogenesis	4/871	27/28891	0.00828758	0.0360046	0.0233478	Bmpr2/Robo1/Robo2/Zfpm2	4	GO_BP	down
GO:0006376	mRNA splice site recognition	4/871	27/28891	0.00828758	0.0360046	0.0233478	Mbnl1/Celf2/Prpf39/Setx	4	GO_BP	down
GO:0010575	positive regulation of vascular endothelial growth factor production	4/871	27/28891	0.00828758	0.0360046	0.0233478	Hif1a/Rora/Cyp1b1/C3	4	GO_BP	down
GO:0032878	regulation of establishment or maintenance of cell polarity	4/871	27/28891	0.00828758	0.0360046	0.0233478	Cyrib/Flot2/Krit1/Wdpcp	4	GO_BP	down
GO:0046716	muscle cell cellular homeostasis	4/871	27/28891	0.00828758	0.0360046	0.0233478	Hif1a/Gaa/Large1/Prkca	4	GO_BP	down
GO:0070841	inclusion body assembly	4/871	27/28891	0.00828758	0.0360046	0.0233478	Prkn/Trim37/Apoe/Pmp22	4	GO_BP	down
GO:1900037	regulation of cellular response to hypoxia	4/871	27/28891	0.00828758	0.0360046	0.0233478	Stat3/Ep300/Ajuba/Kcnk2	4	GO_BP	down
GO:1900407	regulation of cellular response to oxidative stress	4/871	27/28891	0.00828758	0.0360046	0.0233478	Pnpla8/Prkn/Fbln5/Trpm2	4	GO_BP	down
GO:0090087	regulation of peptide transport	16/871	271/28891	0.0085223	0.0368726	0.0239107	Gnaq/Hif1a/Oga/Prkn/Abcg1/Tiam1/Stxbp4/Prkce/Egfr/Gpr27/Efna5/Mcu/Trpm2/Sfrp1/Fbn1/Prkd1	16	GO_BP	down
GO:0035601	protein deacylation	7/871	77/28891	0.00854985	0.0368726	0.0239107	Dyrk1a/Flna/Ncor2/Ep300/Hdac4/Abhd17c/Hdac9	7	GO_BP	down
GO:0098732	macromolecule deacylation	7/871	77/28891	0.00854985	0.0368726	0.0239107	Dyrk1a/Flna/Ncor2/Ep300/Hdac4/Abhd17c/Hdac9	7	GO_BP	down
GO:1902017	regulation of cilium assembly	7/871	77/28891	0.00854985	0.0368726	0.0239107	Map4/Lpar1/Dync2li1/Ccdc88a/Wdpcp/Sdccag8/Syne1	7	GO_BP	down
GO:0014014	negative regulation of gliogenesis	6/871	59/28891	0.00855954	0.0368726	0.0239107	Nf2/Cysltr2/Ski/Tspo/Ldlr/Ptn	6	GO_BP	down
GO:0046460	neutral lipid biosynthetic process	6/871	59/28891	0.00855954	0.0368726	0.0239107	Plpp1/Ang/Plce1/Ldlr/Lpl/C3	6	GO_BP	down
GO:0046463	acylglycerol biosynthetic process	6/871	59/28891	0.00855954	0.0368726	0.0239107	Plpp1/Ang/Plce1/Ldlr/Lpl/C3	6	GO_BP	down
GO:1904356	regulation of telomere maintenance via telomere lengthening	6/871	59/28891	0.00855954	0.0368726	0.0239107	Cct4/Map3k4/Atm/Atr/Naf1/Prkcq	6	GO_BP	down
GO:2000300	regulation of synaptic vesicle exocytosis	6/871	59/28891	0.00855954	0.0368726	0.0239107	Braf/Bcl2l1/Prkca/Stxbp5/Nlgn1/Syt1	6	GO_BP	down
GO:0014074	response to purine-containing compound	9/871	116/28891	0.00856486	0.0368726	0.0239107	Braf/Rapgef2/Pik3r1/Pde4d/Hmgcs1/Trpm2/Pkd2/Zfp36l1/Slc8a1	9	GO_BP	down
GO:0045639	positive regulation of myeloid cell differentiation	9/871	116/28891	0.00856486	0.0368726	0.0239107	Hif1a/Stat3/Notch2/Med1/Mapk14/Stat5b/Prkca/Stat5a/Zfp36l1	9	GO_BP	down
GO:0001508	action potential	11/871	158/28891	0.00860468	0.0370136	0.0240022	Gnaq/Ank3/Slmap/Flna/Ywhah/Fgf13/Kcnma1/Dsg2/Pmp22/Adra1a/Scn7a	11	GO_BP	down
GO:0070085	glycosylation	14/871	225/28891	0.00867276	0.0372452	0.0241524	Ext1/Oga/Cog5/Uggt1/Mgat4b/Galnt17/Large1/Vegfb/Mgat5/Tmtc2/Extl1/Trak2/Gxylt2/Fut1	14	GO_BP	down
GO:2000241	regulation of reproductive process	14/871	225/28891	0.00867276	0.0372452	0.0241524	Prkacb/Stk3/Ddb1/Hdac4/Bcl2l1/Insl6/Ar/Igf1r/Camk2b/Unc5c/Sfrp1/Serpinf1/Sema3a/Zfpm2	14	GO_BP	down
GO:0003158	endothelium development	10/871	137/28891	0.00871805	0.0373784	0.0242387	S1pr3/Bmpr2/Rapgef2/Krit1/Tjp2/Pdpn/Pde4d/Xdh/Zeb1/Fzd2	10	GO_BP	down
GO:0030282	bone mineralization	10/871	137/28891	0.00871805	0.0373784	0.0242387	Hif1a/Bmpr2/Ccn1/Srgn/Pkdcc/Alox15/Slc24a3/Ptn/Gpc3/Slc8a1	10	GO_BP	down
GO:0006302	double-strand break repair	17/871	296/28891	0.0088755	0.0380223	0.0246563	Dek/Arid1b/Kdm2a/Mbtd1/Smarcc2/Bcl7a/Rif1/Trp53bp1/Atm/Wrn/Atr/Rad50/Nbn/Samhd1/Setx/Pola1/Spidr	17	GO_BP	down
GO:1903169	regulation of calcium ion transmembrane transport	13/871	203/28891	0.00891829	0.0381744	0.0247549	Ubr3/Fbxo11/Oga/Ahnak/Ptpn22/Prkce/Pde4d/Fgf14/Gem/Pkd2/Myo5a/Prkd1/Slc8a1	13	GO_BP	down
GO:0007589	body fluid secretion	9/871	117/28891	0.00903795	0.0385919	0.0250257	Hif1a/Med1/Stat5b/Prkce/Egfr/Stat5a/Kcnma1/Xdh/Aqp4	9	GO_BP	down
GO:0030038	contractile actin filament bundle assembly	9/871	117/28891	0.00903795	0.0385919	0.0250257	Braf/Cd47/Zyx/Nf2/Pik3r1/Lpar1/Prkcq/Ccdc88a/Phldb2	9	GO_BP	down
GO:0043149	stress fiber assembly	9/871	117/28891	0.00903795	0.0385919	0.0250257	Braf/Cd47/Zyx/Nf2/Pik3r1/Lpar1/Prkcq/Ccdc88a/Phldb2	9	GO_BP	down
GO:0030072	peptide hormone secretion	18/871	321/28891	0.0091304	0.0389549	0.0252611	Gnaq/Hif1a/Oga/Prkn/Abcg1/Tiam1/Stxbp4/Prkce/Egfr/Pclo/Gpr27/Efna5/Mcu/Trpm2/Sfrp1/Fbn1/Myo5a/Prkd1	18	GO_BP	down
GO:0030316	osteoclast differentiation	10/871	138/28891	0.00915323	0.0390205	0.0253036	Notch2/Rassf2/Mapk14/Lrrk1/Pik3r1/Tjp2/Sfrp1/Fbn1/Gpc3/Lrrc17	10	GO_BP	down
GO:0002335	mature B cell differentiation	5/871	43/28891	0.00918768	0.0390402	0.0253164	Notch2/Lgals8/Plcl2/Lgals1/Dock10	5	GO_BP	down
GO:0007616	long-term memory	5/871	43/28891	0.00918768	0.0390402	0.0253164	Crebbp/Cpeb3/Apoe/Ldlr/Camk4	5	GO_BP	down
GO:0038084	vascular endothelial growth factor signaling pathway	5/871	43/28891	0.00918768	0.0390402	0.0253164	Cd63/Vegfb/Xdh/Robo1/Prkd1	5	GO_BP	down
GO:0050919	negative chemotaxis	5/871	43/28891	0.00918768	0.0390402	0.0253164	Unc5c/Robo1/Sema3a/Robo2/Sema3e	5	GO_BP	down
GO:0006826	iron ion transport	6/871	60/28891	0.00927419	0.0393439	0.0255133	Nectin1/B2m/Abcb7/Flvcr1/Steap4/Abcc5	6	GO_BP	down
GO:0045599	negative regulation of fat cell differentiation	6/871	60/28891	0.00927419	0.0393439	0.0255133	Ncor2/Rora/Zfp36l2/Tgfb1i1/Fbn1/Zfpm2	6	GO_BP	down
GO:0060538	skeletal muscle organ development	14/871	227/28891	0.00933226	0.0394267	0.025567	Ddx17/Mapk14/Ep300/Mbnl1/Plec/Bcl9l/Hdac4/Large1/Ski/Msc/Rbfox1/Pmp22/Hivep3/Hdac9	14	GO_BP	down
GO:0071219	cellular response to molecule of bacterial origin	18/871	322/28891	0.00940831	0.0394267	0.025567	Bcr/Mapk14/Cyrib/Trim12c/Ptpn22/Trim12a/Cxcl16/Prkce/B2m/Map2k3/Prpf8/Prkca/Abca1/Gstp1/Pde4d/Trim30a/Plscr2/Vim	18	GO_BP	down
GO:0043487	regulation of RNA stability	12/871	182/28891	0.00942637	0.0394267	0.025567	Pabpc1/Tnrc6b/Pan3/Qki/Zc3h14/Traf5/Cpeb3/Naf1/Ang/Zfp36l2/Zfp36l1/Vim	12	GO_BP	down
GO:0002089	lens morphogenesis in camera-type eye	4/871	28/28891	0.00944234	0.0394267	0.025567	Nectin1/Hipk2/Ski/Shroom2	4	GO_BP	down
GO:0006882	intracellular zinc ion homeostasis	4/871	28/28891	0.00944234	0.0394267	0.025567	Ap3b1/Mt1/Mt2/Slc30a2	4	GO_BP	down
GO:0051291	protein heterooligomerization	4/871	28/28891	0.00944234	0.0394267	0.025567	Cpsf6/Pkd1/Pkd2/Syt1	4	GO_BP	down
GO:0061744	motor behavior	4/871	28/28891	0.00944234	0.0394267	0.025567	Nr3c1/Ext1/Pmp22/Grp	4	GO_BP	down
GO:0070584	mitochondrion morphogenesis	4/871	28/28891	0.00944234	0.0394267	0.025567	Plec/Bcl2l1/Mfn1/Polg2	4	GO_BP	down
GO:0071480	cellular response to gamma radiation	4/871	28/28891	0.00944234	0.0394267	0.025567	Bcl2l1/Atm/Wrn/Atr	4	GO_BP	down
GO:1900242	regulation of synaptic vesicle endocytosis	4/871	28/28891	0.00944234	0.0394267	0.025567	Prkn/Bcl2l1/Ophn1/Nlgn1	4	GO_BP	down
GO:0001553	luteinization	3/871	15/28891	0.00947445	0.0394267	0.025567	Stat5b/Stat5a/Schip1	3	GO_BP	down
GO:0001865	NK T cell differentiation	3/871	15/28891	0.00947445	0.0394267	0.025567	Ap3b1/Tox/Zbtb16	3	GO_BP	down
GO:0006651	diacylglycerol biosynthetic process	3/871	15/28891	0.00947445	0.0394267	0.025567	Plpp1/Ang/Plce1	3	GO_BP	down
GO:0010838	positive regulation of keratinocyte proliferation	3/871	15/28891	0.00947445	0.0394267	0.025567	Notch2/Trp63/Stxbp4	3	GO_BP	down
GO:0033690	positive regulation of osteoblast proliferation	3/871	15/28891	0.00947445	0.0394267	0.025567	Fbln5/Ccn1/Igf1r	3	GO_BP	down
GO:0034112	positive regulation of homotypic cell-cell adhesion	3/871	15/28891	0.00947445	0.0394267	0.025567	Ank3/Pdpn/Lgals1	3	GO_BP	down
GO:0048755	branching morphogenesis of a nerve	3/871	15/28891	0.00947445	0.0394267	0.025567	Rere/Fgf13/Epha7	3	GO_BP	down
GO:0051290	protein heterotetramerization	3/871	15/28891	0.00947445	0.0394267	0.025567	Cpsf6/Pkd1/Pkd2	3	GO_BP	down
GO:0060211	regulation of nuclear-transcribed mRNA poly(A) tail shortening	3/871	15/28891	0.00947445	0.0394267	0.025567	Pabpc1/Tnrc6b/Cpeb3	3	GO_BP	down
GO:0060442	branching involved in prostate gland morphogenesis	3/871	15/28891	0.00947445	0.0394267	0.025567	Fem1b/Cd44/Sfrp1	3	GO_BP	down
GO:0072176	nephric duct development	3/871	15/28891	0.00947445	0.0394267	0.025567	Greb1l/Epha7/Gpc3	3	GO_BP	down
GO:1900426	positive regulation of defense response to bacterium	3/871	15/28891	0.00947445	0.0394267	0.025567	Lgals9/Rab34/Grn	3	GO_BP	down
GO:1903599	positive regulation of autophagy of mitochondrion	3/871	15/28891	0.00947445	0.0394267	0.025567	Hif1a/Prkn/Bnip3	3	GO_BP	down
GO:1905048	regulation of metallopeptidase activity	3/871	15/28891	0.00947445	0.0394267	0.025567	Stat3/Svbp/Antxr1	3	GO_BP	down
GO:0045446	endothelial cell differentiation	9/871	118/28891	0.00953055	0.0395972	0.0256776	S1pr3/Bmpr2/Rapgef2/Tjp2/Pdpn/Pde4d/Xdh/Zeb1/Fzd2	9	GO_BP	down
GO:0045666	positive regulation of neuron differentiation	9/871	118/28891	0.00953055	0.0395972	0.0256776	Upf3b/Bnip2/Impact/Tcf12/Cpne1/Ascl1/Zeb1/Gli2/Brinp2	9	GO_BP	down
GO:0046683	response to organophosphorus	8/871	98/28891	0.00960095	0.039811	0.0258162	Braf/Rapgef2/Pik3r1/Lpar1/Pde4d/Pkd2/Zfp36l1/Slc8a1	8	GO_BP	down
GO:0050684	regulation of mRNA processing	10/871	139/28891	0.00960482	0.039811	0.0258162	Rbm25/Qki/Zc3h14/Ddx17/Dyrk1a/Celf2/Srpk1/Fam172a/Rbfox1/Zfp36l1	10	GO_BP	down
GO:0099175	regulation of postsynapse organization	10/871	139/28891	0.00960482	0.039811	0.0258162	Asap1/Tiam1/Mfn1/Camk2b/Srgn/Abhd17c/Apoe/Epha7/Nlgn1/Pak3	10	GO_BP	down
GO:0000288	nuclear-transcribed mRNA catabolic process, deadenylation-dependent decay	6/871	61/28891	0.0100304	0.0413784	0.0268326	Pabpc1/Tnrc6b/Pan3/Cpeb3/Zfp36l2/Zfp36l1	6	GO_BP	down
GO:0006278	RNA-templated DNA biosynthetic process	6/871	61/28891	0.0100304	0.0413784	0.0268326	Cct4/Map3k4/Atm/Atr/Rad50/Prkcq	6	GO_BP	down
GO:0007004	telomere maintenance via telomerase	6/871	61/28891	0.0100304	0.0413784	0.0268326	Cct4/Map3k4/Atm/Atr/Rad50/Prkcq	6	GO_BP	down
GO:0010812	negative regulation of cell-substrate adhesion	6/871	61/28891	0.0100304	0.0413784	0.0268326	Pik3r1/Efna5/Ptprz1/Phldb2/Lgals1/Sema3e	6	GO_BP	down
GO:0071103	DNA conformation change	6/871	61/28891	0.0100304	0.0413784	0.0268326	Top2b/Dtd1/Wrn/Tdrd3/Rad50/Nbn	6	GO_BP	down
GO:0098926	postsynaptic signal transduction	6/871	61/28891	0.0100304	0.0413784	0.0268326	Gnaq/Stat3/Large1/Ly6h/Lypd1/Camk4	6	GO_BP	down
GO:0008380	RNA splicing	23/871	449/28891	0.0100778	0.041541	0.0269381	Snrpg/Pabpc1/Thoc2/Rbm25/Slc38a2/Qki/Ddx17/Rbm6/Zfp638/Dyrk1a/Supt20/Cwf19l2/Virma/Ahnak/Mbnl1/Celf2/Srpk1/Pik3r1/Prpf39/Prpf8/Fam172a/Setx/Rbfox1	23	GO_BP	down
GO:0006890	retrograde vesicle-mediated transport, Golgi to endoplasmic reticulum	5/871	44/28891	0.0101143	0.0415606	0.0269508	Plpp3/Gbf1/Atp9b/Arf3/Nbas	5	GO_BP	down
GO:0010613	positive regulation of cardiac muscle hypertrophy	5/871	44/28891	0.0101143	0.0415606	0.0269508	Nr3c1/Adk/Ep300/Prkca/Adra1a	5	GO_BP	down
GO:0017145	stem cell division	5/871	44/28891	0.0101143	0.0415606	0.0269508	Thoc2/Ext1/Samd9l/Zfp36l2/Zbtb16	5	GO_BP	down
GO:0045671	negative regulation of osteoclast differentiation	5/871	44/28891	0.0101143	0.0415606	0.0269508	Pik3r1/Tjp2/Sfrp1/Fbn1/Lrrc17	5	GO_BP	down
GO:0071216	cellular response to biotic stimulus	19/871	349/28891	0.0101317	0.0415994	0.026976	Notch2/Bcr/Mapk14/Cyrib/Trim12c/Ptpn22/Trim12a/Cxcl16/Prkce/B2m/Map2k3/Prpf8/Prkca/Abca1/Gstp1/Pde4d/Trim30a/Plscr2/Vim	19	GO_BP	down
GO:0051492	regulation of stress fiber assembly	8/871	99/28891	0.0101773	0.041754	0.0270762	Braf/Cd47/Nf2/Pik3r1/Lpar1/Prkcq/Ccdc88a/Phldb2	8	GO_BP	down
GO:1901989	positive regulation of cell cycle phase transition	9/871	120/28891	0.0105762	0.0433567	0.0281155	Kmt2e/Crebbp/Ankrd17/Brd4/Trp63/Ube2e2/Stxbp4/Egfr/Stox1	9	GO_BP	down
GO:0071108	protein K48-linked deubiquitination	4/871	29/28891	0.0106968	0.0437142	0.0283473	Usp25/Otud7b/Usp34/Mindy4	4	GO_BP	down
GO:1902473	regulation of protein localization to synapse	4/871	29/28891	0.0106968	0.0437142	0.0283473	Nbea/Neto2/Nlgn1/Magi2	4	GO_BP	down
GO:1902894	negative regulation of miRNA transcription	4/871	29/28891	0.0106968	0.0437142	0.0283473	Ncor1/Hif1a/Ncor2/Hdac4	4	GO_BP	down
GO:1903578	regulation of ATP metabolic process	4/871	29/28891	0.0106968	0.0437142	0.0283473	Stat3/Prkn/Bcl2l1/Tspo	4	GO_BP	down
GO:1904019	epithelial cell apoptotic process	11/871	163/28891	0.0107263	0.0438003	0.0284031	Braf/Bmpr2/Stk3/Krit1/Sav1/Adar/Bcl2l1/Igf1r/Zfp36l1/Ecscr/Angpt1	11	GO_BP	down
GO:0007259	receptor signaling pathway via JAK-STAT	13/871	208/28891	0.010794	0.0440425	0.0285602	Stat3/Stat5b/Ep300/Nf2/Stat2/Il6st/Il15ra/Gbp7/Pkd1/Stat5a/Pkd2/Ghr/Cyp1b1	13	GO_BP	down
GO:0031122	cytoplasmic microtubule organization	6/871	62/28891	0.0108295	0.0441184	0.0286094	Hook3/Clip4/Hook2/Pde4dip/Ccdc88a/Cep126	6	GO_BP	down
GO:1903409	reactive oxygen species biosynthetic process	6/871	62/28891	0.0108295	0.0441184	0.0286094	Stat3/Gbf1/Pikfyve/Prkn/Hdac4/Abcb7	6	GO_BP	down
GO:0006874	intracellular calcium ion homeostasis	18/871	327/28891	0.0109011	0.0443757	0.0287763	Flna/Plcb4/Bnip3/Prkce/Prkca/Pde4d/Ccl19/Thada/Mcu/Trpm2/Pkd2/Apoe/Plce1/Tspoap1/Slc24a3/Myo5a/Prkd1/Slc8a1	18	GO_BP	down
GO:0002244	hematopoietic progenitor cell differentiation	12/871	186/28891	0.0110796	0.0448486	0.0290829	Prrc2c/Ap3b1/Ext1/Braf/Med1/Fnip1/Adar/Sos1/Samd9l/Ptprz1/Sfrp1/Tcaf2	12	GO_BP	down
GO:0046661	male sex differentiation	12/871	186/28891	0.0110796	0.0448486	0.0290829	Fndc3a/Flna/Stat5b/Bcl2l1/Greb1l/Insl6/Stat5a/Ar/Sfrp1/Sema3a/Dmrt3/Zfpm2	12	GO_BP	down
GO:0000245	spliceosomal complex assembly	5/871	45/28891	0.0111029	0.0448486	0.0290829	Mbnl1/Celf2/Srpk1/Prpf39/Setx	5	GO_BP	down
GO:0009394	2'-deoxyribonucleotide metabolic process	5/871	45/28891	0.0111029	0.0448486	0.0290829	Oga/Adk/Dpyd/Samhd1/Xdh	5	GO_BP	down
GO:0014742	positive regulation of muscle hypertrophy	5/871	45/28891	0.0111029	0.0448486	0.0290829	Nr3c1/Adk/Ep300/Prkca/Adra1a	5	GO_BP	down
GO:0019692	deoxyribose phosphate metabolic process	5/871	45/28891	0.0111029	0.0448486	0.0290829	Oga/Adk/Dpyd/Samhd1/Xdh	5	GO_BP	down
GO:0021955	central nervous system neuron axonogenesis	5/871	45/28891	0.0111029	0.0448486	0.0290829	Mycbp2/Prkca/Cdh11/Dclk1/Gli2	5	GO_BP	down
GO:0032365	intracellular lipid transport	5/871	45/28891	0.0111029	0.0448486	0.0290829	Relch/Abcg1/Abca1/Ldlr/Gramd1b	5	GO_BP	down
GO:0045066	regulatory T cell differentiation	5/871	45/28891	0.0111029	0.0448486	0.0290829	Ncor1/Tox/Lgals9/Cd44/Drosha	5	GO_BP	down
GO:0045880	positive regulation of smoothened signaling pathway	5/871	45/28891	0.0111029	0.0448486	0.0290829	Ttc23/Dync2h1/Rab34/Sfrp1/Gpc3	5	GO_BP	down
GO:0014897	striated muscle hypertrophy	9/871	121/28891	0.0111303	0.0449244	0.0291321	Smad1/Nr3c1/Jarid2/Adk/Ep300/Tiam1/Prkca/Ar/Adra1a	9	GO_BP	down
GO:1901880	negative regulation of protein depolymerization	7/871	81/28891	0.011159	0.0450056	0.0291847	Mid1/Eml4/Flii/Fgf13/Shroom2/Lmod1/Swap70	7	GO_BP	down
GO:0055074	calcium ion homeostasis	19/871	353/28891	0.0113315	0.0455819	0.0295585	Flna/Plcb4/Bnip3/Prkce/Prkca/Pde4d/Ccl19/Thada/Mcu/Trpm2/Pkd2/Apoe/Plce1/Tmtc2/Tspoap1/Slc24a3/Myo5a/Prkd1/Slc8a1	19	GO_BP	down
GO:0030238	male sex determination	3/871	16/28891	0.011403	0.0455819	0.0295585	Map3k4/Ar/Igf1r	3	GO_BP	down
GO:0043508	negative regulation of JUN kinase activity	3/871	16/28891	0.011403	0.0455819	0.0295585	Ptpn22/Gstp1/Sfrp1	3	GO_BP	down
GO:0060831	smoothened signaling pathway involved in dorsal/ventral neural tube patterning	3/871	16/28891	0.011403	0.0455819	0.0295585	Prkacb/Gli3/Gli2	3	GO_BP	down
GO:0060979	vasculogenesis involved in coronary vascular morphogenesis	3/871	16/28891	0.011403	0.0455819	0.0295585	Tgfbr3/Angpt1/Zfpm2	3	GO_BP	down
GO:0061029	eyelid development in camera-type eye	3/871	16/28891	0.011403	0.0455819	0.0295585	Kmt2c/Sos1/Egfr	3	GO_BP	down
GO:0061548	ganglion development	3/871	16/28891	0.011403	0.0455819	0.0295585	Ascl1/Unc5c/Sema3a	3	GO_BP	down
GO:1902043	positive regulation of extrinsic apoptotic signaling pathway via death domain receptors	3/871	16/28891	0.011403	0.0455819	0.0295585	Stk3/Trps1/Sfrp1	3	GO_BP	down
GO:1904181	positive regulation of membrane depolarization	3/871	16/28891	0.011403	0.0455819	0.0295585	Ank3/Oga/Tspo	3	GO_BP	down
GO:0002274	myeloid leukocyte activation	16/871	280/28891	0.0114044	0.0455819	0.0295585	Kmt2e/Notch2/Bcr/Lgals9/Prkce/Atm/Myo18a/Grn/Ifngr1/Rora/Mfhas1/Grp/Ldlr/Camk4/Plscr2/Fcer2a	16	GO_BP	down
GO:0019915	lipid storage	8/871	101/28891	0.0114064	0.0455819	0.0295585	Stat5b/Abcg1/Mospd2/Stat5a/Rnf213/Apoe/Lpl/C3	8	GO_BP	down
GO:0035773	insulin secretion involved in cellular response to glucose stimulus	8/871	101/28891	0.0114064	0.0455819	0.0295585	Hif1a/Prkn/Abcg1/Tiam1/Stxbp4/Prkce/Gpr27/Efna5	8	GO_BP	down
GO:0042770	signal transduction in response to DNA damage	12/871	187/28891	0.0115259	0.0460243	0.0298454	Dyrk1a/Mapk14/Brd4/Trp53bp1/Hipk2/Sp100/Fem1b/Atm/Atr/Cd44/Nbn/Stk33	12	GO_BP	down
GO:0048675	axon extension	10/871	143/28891	0.0115831	0.0462177	0.0299707	Ttc3/Auts2/Bmpr2/Ep300/Cdh4/Arhgap32/Apoe/Dclk1/Sema3a/Sema3e	10	GO_BP	down
GO:0030307	positive regulation of cell growth	13/871	210/28891	0.0116248	0.0463487	0.0300557	Nr3c1/Bmpr2/Ep300/Prkn/Tead1/Cxcl16/Cdh4/Arhgap32/Egfr/Efna5/Sfrp1/Apoe/Syt1	13	GO_BP	down
GO:0042058	regulation of epidermal growth factor receptor signaling pathway	6/871	63/28891	0.0116725	0.0464681	0.0301331	Mvp/Ptprj/Egfr/Ccdc88a/Cblb/Itga1	6	GO_BP	down
GO:0060193	positive regulation of lipase activity	6/871	63/28891	0.0116725	0.0464681	0.0301331	Gnaq/Lpar1/Ccn1/Camk2b/Ang/Adra1a	6	GO_BP	down
GO:0008585	female gonad development	9/871	122/28891	0.0117058	0.0465651	0.030196	Stat5b/Bcl2l1/Atm/Pde4d/Stat5a/Sfrp1/Angpt1/Schip1/Zfpm2	9	GO_BP	down
GO:0043583	ear development	15/871	257/28891	0.0117264	0.0466118	0.0302263	Eya4/H2-K1/Bcr/Tshz1/Ttc39c/Gli3/Kcnma1/Shroom2/Wdpcp/Plppr4/Stox1/Pcdh15/Zeb1/Fzd2/Gli2	15	GO_BP	down
GO:0021537	telencephalon development	16/871	281/28891	0.011767	0.0467377	0.030308	Hif1a/Ext1/Herc1/Ncor2/Nf2/Gli3/Wdr37/Large1/Egfr/Ski/Fgf13/Ascl1/Robo1/Fut1/Sema3a/Robo2	16	GO_BP	down
GO:0008625	extrinsic apoptotic signaling pathway via death domain receptors	7/871	82/28891	0.0118925	0.0472002	0.0306079	Stk3/Pik3r1/Sp100/Trps1/Fem1b/Bcl2l1/Sfrp1	7	GO_BP	down
GO:0000910	cytokinesis	12/871	188/28891	0.0119858	0.0475064	0.0308065	Ank3/Pkp4/Iqgap1/Exoc4/Exoc6b/Cspp1/Plec/Prkce/Bcl2l1/Igf1r/Cdc14b/Ahctf1	12	GO_BP	down
GO:0010592	positive regulation of lamellipodium assembly	4/871	30/28891	0.012054	0.0475064	0.0308065	Auts2/Pik3r1/Hdac4/Plce1	4	GO_BP	down
GO:0021884	forebrain neuron development	4/871	30/28891	0.012054	0.0475064	0.0308065	Gnaq/Rapgef2/Sema3a/Sema3e	4	GO_BP	down
GO:0031664	regulation of lipopolysaccharide-mediated signaling pathway	4/871	30/28891	0.012054	0.0475064	0.0308065	Trim12c/Trim12a/Prkca/Trim30a	4	GO_BP	down
GO:0045932	negative regulation of muscle contraction	4/871	30/28891	0.012054	0.0475064	0.0308065	Kcnma1/Calcrl/Irag1/Dock4	4	GO_BP	down
GO:0051590	positive regulation of neurotransmitter transport	4/871	30/28891	0.012054	0.0475064	0.0308065	Prkn/Bcl2l1/Nlgn1/Syt1	4	GO_BP	down
GO:0061003	positive regulation of dendritic spine morphogenesis	4/871	30/28891	0.012054	0.0475064	0.0308065	Tiam1/Mfn1/Camk2b/Pak3	4	GO_BP	down
GO:0019935	cyclic-nucleotide-mediated signaling	8/871	102/28891	0.0120604	0.0475064	0.0308065	Rapgef2/Lpar1/Pde4d/Gucy1a2/Apoe/Adcy2/Irag1/Gnai1	8	GO_BP	down
GO:0034446	substrate adhesion-dependent cell spreading	8/871	102/28891	0.0120604	0.0475064	0.0308065	Braf/Flna/Pdpn/Peak1/Efna5/Sfrp1/Lamb3/Antxr1	8	GO_BP	down
GO:1904063	negative regulation of cation transmembrane transport	8/871	102/28891	0.0120604	0.0475064	0.0308065	Nedd4/Ank3/Ubr3/Fbxo11/Prkce/Gem/Pkd2/Grp	8	GO_BP	down
GO:0009799	specification of symmetry	10/871	144/28891	0.0121226	0.0476797	0.0309188	Hif1a/Notch2/Kdm2a/Dync2h1/Map3k4/Dync2li1/Bicc1/Pkd2/Invs/Pcsk5	10	GO_BP	down
GO:0009855	determination of bilateral symmetry	10/871	144/28891	0.0121226	0.0476797	0.0309188	Hif1a/Notch2/Kdm2a/Dync2h1/Map3k4/Dync2li1/Bicc1/Pkd2/Invs/Pcsk5	10	GO_BP	down
GO:0014044	Schwann cell development	5/871	46/28891	0.0121554	0.0477731	0.0309794	Plec/Itgb4/Sos1/Ski/Pmp22	5	GO_BP	down
GO:0014896	muscle hypertrophy	9/871	123/28891	0.0123032	0.0483174	0.0313324	Smad1/Nr3c1/Jarid2/Adk/Ep300/Tiam1/Prkca/Ar/Adra1a	9	GO_BP	down
GO:0050731	positive regulation of peptidyl-tyrosine phosphorylation	12/871	189/28891	0.0124597	0.0488956	0.0317073	Plpp3/Iqgap1/Lrrk1/Ptprj/Il6st/Cd44/Vegfb/Efna5/Ptprz1/Ghr/Angpt1/Adra1a	12	GO_BP	down
GO:0044706	multi-multicellular organism process	13/871	212/28891	0.0125043	0.0490336	0.0317968	Bmpr2/Med1/Lgals9/Stat5b/Itgb4/Atr/Grn/H2-Q7/Stat5a/Ar/H2-Q2/Ptn/Pcsk5	13	GO_BP	down
GO:0032412	regulation of monoatomic ion transmembrane transporter activity	16/871	283/28891	0.0125193	0.0490559	0.0318112	Nedd4/Ank3/Slmap/Ahnak/Ywhah/Prkca/Pde4d/Fgf13/Fgf14/Gem/Pkd2/Tcaf2/Nlgn1/Grip1/Grp/Myo5a	16	GO_BP	down
GO:0001736	establishment of planar polarity	6/871	64/28891	0.0125607	0.0491079	0.031845	Trp63/Wdpcp/Sfrp1/Astn2/Gpc3/Fzd2	6	GO_BP	down
GO:0010517	regulation of phospholipase activity	6/871	64/28891	0.0125607	0.0491079	0.031845	Gnaq/Lpar1/Ccn1/Camk2b/Ang/Adra1a	6	GO_BP	down
GO:0050775	positive regulation of dendrite morphogenesis	6/871	64/28891	0.0125607	0.0491079	0.031845	Tiam1/Pias2/Mfn1/Camk2b/Pak3/Grip1	6	GO_BP	down
GO:0007517	muscle organ development	20/871	382/28891	0.0126275	0.0493321	0.0319904	Ddx17/Med1/Mapk14/Jph1/Ep300/Mbnl1/Tgfbr3/Plec/Bcl9l/Hdac4/Large1/Ski/Msc/Rbfox1/Pmp22/Hivep3/Hdac9/Fzd2/Angpt1/Zfpm2	20	GO_BP	down
GO:2000179	positive regulation of neural precursor cell proliferation	7/871	83/28891	0.0126601	0.0494227	0.0320491	Hif1a/Notch2/Tox/Flna/Gli3/Ascl1/Gli2	7	GO_BP	down
GO:0034614	cellular response to reactive oxygen species	10/871	145/28891	0.0126808	0.0494296	0.0320536	Ep300/Bnip3/Atm/Fbln5/Egfr/Ptprk/Setx/Trpm2/Cyp1b1/Slc8a1	10	GO_BP	down
GO:1903322	positive regulation of protein modification by small protein conjugation or removal	10/871	145/28891	0.0126808	0.0494296	0.0320536	Tank/Mycbp2/Btrc/Prkn/Ptpn22/Birc2/Hdac4/Cblb/Rnf180/Angpt1	10	GO_BP	down
GO:0016052	carbohydrate catabolic process	11/871	167/28891	0.0126948	0.0494473	0.0320651	Ncor1/Hif1a/Stat3/Tpi1/Zbtb20/Ep300/Gaa/Hdac4/Prkag2/Sik2/Cbfa2t3	11	GO_BP	down
GO:0002700	regulation of production of molecular mediator of immune response	14/871	236/28891	0.0128026	0.0498301	0.0323133	H2-D1/H2-K1/H2-T22/Rigi/Rif1/Trp53bp1/Ptpn22/B2m/H2-Q4/H2-Q7/H2-Q6/H2-Q2/Angpt1/H2-M2	14	GO_BP	down
GO:0001558	regulation of cell growth	23/871	459/28891	0.0128257	0.0498831	0.0323477	Ttc3/Nr3c1/Bmpr2/St7l/Ep300/Prkn/Tead1/Nf2/Cxcl16/Ptprj/Cdh4/Arhgap32/Egfr/Cd44/Fgf13/Efna5/Sfrp1/Tnc/Apoe/Epha7/Sema3a/Syt1/Sema3e	23	GO_BP	down
GO:0031396	regulation of protein ubiquitination	13/871	213/28891	0.0129628	0.0503789	0.0326692	Svbp/Mycbp2/N4bp1/Btrc/Prkn/Ptpn22/Birc2/Prkce/Spopl/Tspo/Cblb/Rnf180/Angpt1	13	GO_BP	down
GO:0009991	response to extracellular stimulus	23/871	460/28891	0.0131306	0.0509931	0.0330675	Crebbp/Impact/Med1/Mapk14/Ep300/Mtmr3/Gsdmd/Tbc1d5/Fnip1/Plec/Dpyd/Itga6/Wrn/Vps41/Sik2/Rasal2/Rragd/Apoe/Ghr/Fbn1/Ldlr/Prkd1/Lpl	23	GO_BP	down
GO:0042471	ear morphogenesis	10/871	146/28891	0.0132581	0.0511689	0.0331814	Eya4/Bcr/Tshz1/Ttc39c/Wdpcp/Stox1/Pcdh15/Zeb1/Fzd2/Gli2	10	GO_BP	down
GO:0006623	protein targeting to vacuole	5/871	47/28891	0.0132736	0.0511689	0.0331814	Nedd4/Ap3b1/Snx16/Vps13a/Vps41	5	GO_BP	down
GO:0007628	adult walking behavior	5/871	47/28891	0.0132736	0.0511689	0.0331814	Hipk2/Kcnma1/Pmp22/Pcdh15/Dmrt3	5	GO_BP	down
GO:0008038	neuron recognition	5/871	47/28891	0.0132736	0.0511689	0.0331814	Ext1/Ptprz1/Robo1/Sema3a/Robo2	5	GO_BP	down
GO:0009262	deoxyribonucleotide metabolic process	5/871	47/28891	0.0132736	0.0511689	0.0331814	Oga/Adk/Dpyd/Samhd1/Xdh	5	GO_BP	down
GO:0021696	cerebellar cortex morphogenesis	5/871	47/28891	0.0132736	0.0511689	0.0331814	Atxn2/Herc1/Rora/Ophn1/Gli2	5	GO_BP	down
GO:0042789	mRNA transcription by RNA polymerase II	5/871	47/28891	0.0132736	0.0511689	0.0331814	Stat3/Ap3b1/Ncoa2/Med1/Flna	5	GO_BP	down
GO:0046636	negative regulation of alpha-beta T cell activation	5/871	47/28891	0.0132736	0.0511689	0.0331814	Lgals9/Itch/Gli3/Cd44/Cblb	5	GO_BP	down
GO:0071300	cellular response to retinoic acid	5/871	47/28891	0.0132736	0.0511689	0.0331814	Tead1/Atm/Abca1/Setx/Brinp2	5	GO_BP	down
GO:0120163	negative regulation of cold-induced thermogenesis	5/871	47/28891	0.0132736	0.0511689	0.0331814	Acot13/Lnpep/Plcl2/Map2k6/Lama4	5	GO_BP	down
GO:0030534	adult behavior	12/871	191/28891	0.0134505	0.0512551	0.0332374	Ntan1/Crebbp/Prkn/Hipk2/Fgf14/Kcnma1/Pmp22/Sdk1/Pcdh15/Unc79/Rnf180/Dmrt3	12	GO_BP	down
GO:0042552	myelination	12/871	191/28891	0.0134505	0.0512551	0.0332374	Qki/Pikfyve/Plec/Itgb4/Sos1/Large1/Ski/Fig4/Ptprz1/Pmp22/Myo5a/Ptn	12	GO_BP	down
GO:0060191	regulation of lipase activity	7/871	84/28891	0.0134628	0.0512551	0.0332374	Gnaq/Lpar1/Ccn1/Camk2b/Ang/Hdac9/Adra1a	7	GO_BP	down
GO:0003170	heart valve development	6/871	65/28891	0.0134954	0.0512551	0.0332374	Notch2/Bmpr2/Ccn1/Robo1/Robo2/Zfpm2	6	GO_BP	down
GO:0006476	protein deacetylation	6/871	65/28891	0.0134954	0.0512551	0.0332374	Dyrk1a/Flna/Ncor2/Ep300/Hdac4/Hdac9	6	GO_BP	down
GO:0007164	establishment of tissue polarity	6/871	65/28891	0.0134954	0.0512551	0.0332374	Trp63/Wdpcp/Sfrp1/Astn2/Gpc3/Fzd2	6	GO_BP	down
GO:0050873	brown fat cell differentiation	6/871	65/28891	0.0134954	0.0512551	0.0332374	Mapk14/Bnip3/Itga6/Lamb3/Fbn1/Lama4	6	GO_BP	down
GO:0001832	blastocyst growth	4/871	31/28891	0.0135167	0.0512551	0.0332374	Rtf1/Brd4/Grn/Nbn	4	GO_BP	down
GO:0006829	zinc ion transport	4/871	31/28891	0.0135167	0.0512551	0.0332374	Ap3b1/Slc39a11/Trpm2/Slc30a2	4	GO_BP	down
GO:0021533	cell differentiation in hindbrain	4/871	31/28891	0.0135167	0.0512551	0.0332374	Atxn2/Herc1/Rora/Ophn1	4	GO_BP	down
GO:0032367	intracellular cholesterol transport	4/871	31/28891	0.0135167	0.0512551	0.0332374	Relch/Abcg1/Abca1/Ldlr	4	GO_BP	down
GO:0050858	negative regulation of antigen receptor-mediated signaling pathway	4/871	31/28891	0.0135167	0.0512551	0.0332374	Ptpn22/Ptprj/Cblb/Plcl2	4	GO_BP	down
GO:0070233	negative regulation of T cell apoptotic process	4/871	31/28891	0.0135167	0.0512551	0.0332374	Hif1a/Kifap3/Serpinb9/Prkcq	4	GO_BP	down
GO:0086010	membrane depolarization during action potential	4/871	31/28891	0.0135167	0.0512551	0.0332374	Ank3/Slmap/Ywhah/Scn7a	4	GO_BP	down
GO:0002431	Fc receptor mediated stimulatory signaling pathway	3/871	17/28891	0.0135408	0.0512551	0.0332374	Cd47/Ptprj/Plscr2	3	GO_BP	down
GO:0003128	heart field specification	3/871	17/28891	0.0135408	0.0512551	0.0332374	Ext1/Robo1/Robo2	3	GO_BP	down
GO:0006474	N-terminal protein amino acid acetylation	3/871	17/28891	0.0135408	0.0512551	0.0332374	Crebbp/Ep300/Naa16	3	GO_BP	down
GO:0060044	negative regulation of cardiac muscle cell proliferation	3/871	17/28891	0.0135408	0.0512551	0.0332374	Jarid2/Sav1/Kcnk2	3	GO_BP	down
GO:0060413	atrial septum morphogenesis	3/871	17/28891	0.0135408	0.0512551	0.0332374	Notch2/Bmpr2/Ccn1	3	GO_BP	down
GO:0061000	negative regulation of dendritic spine development	3/871	17/28891	0.0135408	0.0512551	0.0332374	Asap1/Apoe/Nlgn1	3	GO_BP	down
GO:0061158	3'-UTR-mediated mRNA destabilization	3/871	17/28891	0.0135408	0.0512551	0.0332374	Cpeb3/Zfp36l2/Zfp36l1	3	GO_BP	down
GO:0097531	mast cell migration	3/871	17/28891	0.0135408	0.0512551	0.0332374	Stat5b/Vegfb/Swap70	3	GO_BP	down
GO:1903423	positive regulation of synaptic vesicle recycling	3/871	17/28891	0.0135408	0.0512551	0.0332374	Bcl2l1/Pclo/Nlgn1	3	GO_BP	down
GO:1903978	regulation of microglial cell activation	3/871	17/28891	0.0135408	0.0512551	0.0332374	Atm/Grn/Ldlr	3	GO_BP	down
GO:2001171	positive regulation of ATP biosynthetic process	3/871	17/28891	0.0135408	0.0512551	0.0332374	Stat3/Prkn/Bcl2l1	3	GO_BP	down
GO:0045582	positive regulation of T cell differentiation	9/871	125/28891	0.0135657	0.0512755	0.0332506	Ap3b1/Arid1b/Lgals9/Smarcc2/Stat5b/Gli3/Ccl19/Stat5a/Zbtb16	9	GO_BP	down
GO:0046545	development of primary female sexual characteristics	9/871	125/28891	0.0135657	0.0512755	0.0332506	Stat5b/Bcl2l1/Atm/Pde4d/Stat5a/Sfrp1/Angpt1/Schip1/Zfpm2	9	GO_BP	down
GO:0005996	monosaccharide metabolic process	16/871	287/28891	0.0141366	0.0533948	0.0346249	Hif1a/Nr3c1/Ncoa2/Supt20/Ppp4r3a/Tpi1/Mapk14/Ep300/Galk2/Prkn/Ddb1/Pik3r1/Pdk3/Rora/Pdha1/Fbn1	16	GO_BP	down
GO:0035303	regulation of dephosphorylation	9/871	126/28891	0.0142318	0.053677	0.0348079	Ppp1r12a/Iqgap1/Mtmr3/Npnt/Mgat5/Mfhas1/Swap70/Magi2/Itga1	9	GO_BP	down
GO:0051588	regulation of neurotransmitter transport	9/871	126/28891	0.0142318	0.053677	0.0348079	Slc38a2/Braf/Prkn/Bcl2l1/Prkca/Stxbp5/Mctp2/Nlgn1/Syt1	9	GO_BP	down
GO:0043112	receptor metabolic process	7/871	85/28891	0.0143013	0.0538613	0.0349274	Nedd4/Itch/Rnf43/Gprasp1/Gria3/Apoe/Ldlr	7	GO_BP	down
GO:2000379	positive regulation of reactive oxygen species metabolic process	7/871	85/28891	0.0143013	0.0538613	0.0349274	Mapk14/Hdac4/Egfr/Gstp1/Tspo/Xdh/Cyp1b1	7	GO_BP	down
GO:0071222	cellular response to lipopolysaccharide	17/871	312/28891	0.0143526	0.0540156	0.0350275	Bcr/Mapk14/Trim12c/Ptpn22/Trim12a/Cxcl16/Prkce/B2m/Map2k3/Prpf8/Prkca/Abca1/Gstp1/Pde4d/Trim30a/Plscr2/Vim	17	GO_BP	down
GO:0001941	postsynaptic membrane organization	5/871	48/28891	0.0144591	0.0541741	0.0351302	Apoe/Nlgn1/Magi2/Ptn/Colq	5	GO_BP	down
GO:0030501	positive regulation of bone mineralization	5/871	48/28891	0.0144591	0.0541741	0.0351302	Bmpr2/Ccn1/Pkdcc/Ptn/Slc8a1	5	GO_BP	down
GO:0032873	negative regulation of stress-activated MAPK cascade	5/871	48/28891	0.0144591	0.0541741	0.0351302	Ncor1/Ptpn22/Itch/Gstp1/Sfrp1	5	GO_BP	down
GO:0055023	positive regulation of cardiac muscle tissue growth	5/871	48/28891	0.0144591	0.0541741	0.0351302	Nr3c1/Mapk14/Ep300/Tgfbr3/Zfpm2	5	GO_BP	down
GO:1905144	response to acetylcholine	5/871	48/28891	0.0144591	0.0541741	0.0351302	Gnaq/Large1/Tspo/Ly6h/Lypd1	5	GO_BP	down
GO:0048706	embryonic skeletal system development	10/871	148/28891	0.0144716	0.0541741	0.0351302	Chst11/Ext1/Etl4/Mbtd1/Gli3/Flvcr1/Xylt1/Zeb1/Pcsk5/Ucma	10	GO_BP	down
GO:0042311	vasodilation	6/871	66/28891	0.0144775	0.0541741	0.0351302	Ext1/Egfr/Kcnma1/Apoe/Irag1/Itga1	6	GO_BP	down
GO:0045778	positive regulation of ossification	6/871	66/28891	0.0144775	0.0541741	0.0351302	Bmpr2/Ccn1/Pkdcc/Ptn/Zbtb16/Slc8a1	6	GO_BP	down
GO:0051897	positive regulation of phosphatidylinositol 3-kinase/protein kinase B signal transduction	12/871	193/28891	0.0145003	0.0542208	0.0351605	Nedd4/Cpne1/Stk3/Ptprj/Egfr/Vegfb/Ccl19/Igf1r/Mfhas1/Stox1/Angpt1/Sema3e	12	GO_BP	down
GO:1901361	organic cyclic compound catabolic process	24/871	491/28891	0.014741	0.0550813	0.0357186	Pabpc1/Tnrc6b/Rnaset2b/Pan3/Qki/Zc3h14/Upf3b/Trnt1/Hint1/Upf2/Traf5/Ywhah/Dpyd/Cpeb3/Atm/Nbas/Naf1/Samhd1/Ang/Zfp36l2/Apoe/Xdh/Zfp36l1/Vim	24	GO_BP	down
GO:0070646	protein modification by small protein removal	9/871	127/28891	0.0149218	0.0556941	0.0361159	Usp25/Otud7b/Senp7/Tank/Usp34/Usp24/Hint1/Itch/Mindy4	9	GO_BP	down
GO:0048284	organelle fusion	11/871	171/28891	0.0149262	0.0556941	0.0361159	Stx8/Vti1a/Pikfyve/Rab34/Prkn/Bnip3/Vps41/Mfn1/Samd9l/Stxbp6/Syt1	11	GO_BP	down
GO:0007272	ensheathment of neurons	12/871	194/28891	0.015048	0.0558183	0.0361964	Qki/Pikfyve/Plec/Itgb4/Sos1/Large1/Ski/Fig4/Ptprz1/Pmp22/Myo5a/Ptn	12	GO_BP	down
GO:0008366	axon ensheathment	12/871	194/28891	0.015048	0.0558183	0.0361964	Qki/Pikfyve/Plec/Itgb4/Sos1/Large1/Ski/Fig4/Ptprz1/Pmp22/Myo5a/Ptn	12	GO_BP	down
GO:0046887	positive regulation of hormone secretion	12/871	194/28891	0.015048	0.0558183	0.0361964	Gnaq/Hif1a/Oga/Prkn/Abcg1/Prkce/Egfr/Gpr27/Mcu/Trpm2/Nell2/Prkd1	12	GO_BP	down
GO:0010623	programmed cell death involved in cell development	4/871	32/28891	0.0150875	0.0558183	0.0361964	Ddb1/Bcl2l1/Insl6/Unc5c	4	GO_BP	down
GO:0021952	central nervous system projection neuron axonogenesis	4/871	32/28891	0.0150875	0.0558183	0.0361964	Mycbp2/Cdh11/Dclk1/Gli2	4	GO_BP	down
GO:0022011	myelination in peripheral nervous system	4/871	32/28891	0.0150875	0.0558183	0.0361964	Plec/Itgb4/Ski/Pmp22	4	GO_BP	down
GO:0032292	peripheral nervous system axon ensheathment	4/871	32/28891	0.0150875	0.0558183	0.0361964	Plec/Itgb4/Ski/Pmp22	4	GO_BP	down
GO:0034063	stress granule assembly	4/871	32/28891	0.0150875	0.0558183	0.0361964	Prrc2c/G3bp1/Ddx6/Atxn2	4	GO_BP	down
GO:0035162	embryonic hemopoiesis	4/871	32/28891	0.0150875	0.0558183	0.0361964	Hif1a/Med1/Kat6a/Stk3	4	GO_BP	down
GO:0045745	positive regulation of G protein-coupled receptor signaling pathway	4/871	32/28891	0.0150875	0.0558183	0.0361964	Prkca/Gpr27/Grp/C3	4	GO_BP	down
GO:0071875	adrenergic receptor signaling pathway	4/871	32/28891	0.0150875	0.0558183	0.0361964	Rapgef2/Pde4d/Adcy9/Adra1a	4	GO_BP	down
GO:1903146	regulation of autophagy of mitochondrion	4/871	32/28891	0.0150875	0.0558183	0.0361964	Hif1a/Prkn/Bnip3/Tspo	4	GO_BP	down
GO:0021700	developmental maturation	20/871	389/28891	0.0151048	0.055843	0.0362125	Gnaq/Ank3/Hif1a/Ext1/Rere/Ankrd17/Ap1g1/Cd63/Fem1b/Flvcr1/Ccl19/Kcnma1/Ascl1/Camk2b/Xylt1/Pmp22/Nlgn1/Myo5a/Zbtb16/C3	20	GO_BP	down
GO:0072332	intrinsic apoptotic signaling pathway by p53 class mediator	7/871	86/28891	0.0151764	0.0560681	0.0363584	Trp63/Hint1/Ep300/Prkn/Hipk2/Wwox/Cd44	7	GO_BP	down
GO:0001818	negative regulation of cytokine production	17/871	314/28891	0.0151908	0.0560815	0.0363672	Otud7b/Anxa4/Crebbp/N4bp1/Lgals9/Ptpn22/Rnf128/Gstp1/Il20rb/Gbp7/Tspo/Dhx58/Srgn/Trim30a/Hdac9/Aqp4/Angpt1	17	GO_BP	down
GO:0001658	branching involved in ureteric bud morphogenesis	6/871	67/28891	0.0155082	0.0571326	0.0370487	Npnt/Greb1l/Gli3/Cd44/Hs3st3a1/Gpc3	6	GO_BP	down
GO:0010770	positive regulation of cell morphogenesis	6/871	67/28891	0.0155082	0.0571326	0.0370487	Tiam1/Pias2/Mfn1/Camk2b/Pak3/Grip1	6	GO_BP	down
GO:0032835	glomerulus development	6/871	67/28891	0.0155082	0.0571326	0.0370487	Ext1/Notch2/Myo1e/Plce1/Basp1/Angpt1	6	GO_BP	down
GO:0050728	negative regulation of inflammatory response	11/871	172/28891	0.0155275	0.0571636	0.0370688	Stat3/Bcr/Lgals9/Cd44/Grn/Gstp1/Il20rb/Rora/Mfhas1/Apoe/Ldlr	11	GO_BP	down
GO:0051896	regulation of phosphatidylinositol 3-kinase/protein kinase B signal transduction	15/871	266/28891	0.0156077	0.0573889	0.0372149	Ncor1/Nedd4/Cpne1/Stk3/Ptprj/Egfr/Vegfb/Ccl19/Igf1r/Mfhas1/Stox1/Xdh/Magi2/Angpt1/Sema3e	15	GO_BP	down
GO:0031330	negative regulation of cellular catabolic process	12/871	195/28891	0.0156112	0.0573889	0.0372149	Stat3/Qki/Herc1/Ep300/Ptpn22/Traf5/Nrbp2/Nbas/Naf1/Tspo/Rragd/Adra1a	12	GO_BP	down
GO:0006909	phagocytosis	14/871	242/28891	0.0156216	0.0573889	0.0372149	Bcr/Cd47/Pikfyve/Rab34/Cnn2/Ptprj/Myo18a/Il15ra/Abca1/Pros1/Alox15/Ldlr/Plscr2/C3	14	GO_BP	down
GO:0051261	protein depolymerization	9/871	128/28891	0.015636	0.0574016	0.0372232	Mical3/Mid1/Eml4/Flii/Fgf13/Shroom2/Nckap5/Lmod1/Swap70	9	GO_BP	down
GO:0034205	amyloid-beta formation	5/871	49/28891	0.0157135	0.0575246	0.0373029	Dyrk1a/Abcg1/Ifngr1/Apoe/Slc2a13	5	GO_BP	down
GO:0035137	hindlimb morphogenesis	5/871	49/28891	0.0157135	0.0575246	0.0373029	Med1/Trp63/Large1/Gpc3/Zbtb16	5	GO_BP	down
GO:0070303	negative regulation of stress-activated protein kinase signaling cascade	5/871	49/28891	0.0157135	0.0575246	0.0373029	Ncor1/Ptpn22/Itch/Gstp1/Sfrp1	5	GO_BP	down
GO:1900077	negative regulation of cellular response to insulin stimulus	5/871	49/28891	0.0157135	0.0575246	0.0373029	Ptprj/Prkca/Prkcq/Lpl/Grb10	5	GO_BP	down
GO:2001252	positive regulation of chromosome organization	8/871	107/28891	0.0157498	0.0576172	0.037363	Cct4/Map3k4/Atm/Atr/Rad50/Nbn/Naf1/Prkcq	8	GO_BP	down
GO:0002753	cytosolic pattern recognition receptor signaling pathway	10/871	150/28891	0.0157662	0.0576368	0.0373757	Stmp1/Rigi/Ankrd17/Trim25/Ptpn22/Irf7/Dhx58/Trim30a/Ddx60/Prkd1	10	GO_BP	down
GO:0021702	cerebellar Purkinje cell differentiation	3/871	18/28891	0.0158907	0.0577694	0.0374617	Atxn2/Herc1/Rora	3	GO_BP	down
GO:0033631	cell-cell adhesion mediated by integrin	3/871	18/28891	0.0158907	0.0577694	0.0374617	Plpp3/Npnt/Swap70	3	GO_BP	down
GO:0039535	regulation of RIG-I signaling pathway	3/871	18/28891	0.0158907	0.0577694	0.0374617	Ankrd17/Dhx58/Ddx60	3	GO_BP	down
GO:0045837	negative regulation of membrane potential	3/871	18/28891	0.0158907	0.0577694	0.0374617	Bnip3/Prkce/Ptn	3	GO_BP	down
GO:0060572	morphogenesis of an epithelial bud	3/871	18/28891	0.0158907	0.0577694	0.0374617	Trp63/Ar/Gli2	3	GO_BP	down
GO:0097048	dendritic cell apoptotic process	3/871	18/28891	0.0158907	0.0577694	0.0374617	Rapgef2/Bcl2l1/Ccl19	3	GO_BP	down
GO:1903580	positive regulation of ATP metabolic process	3/871	18/28891	0.0158907	0.0577694	0.0374617	Stat3/Prkn/Bcl2l1	3	GO_BP	down
GO:2000668	regulation of dendritic cell apoptotic process	3/871	18/28891	0.0158907	0.0577694	0.0374617	Rapgef2/Bcl2l1/Ccl19	3	GO_BP	down
GO:0002200	somatic diversification of immune receptors	7/871	87/28891	0.0160889	0.0584088	0.0378763	Rif1/Trp53bp1/Adar/Atm/Nbn/Samhd1/Swap70	7	GO_BP	down
GO:0006809	nitric oxide biosynthetic process	7/871	87/28891	0.0160889	0.0584088	0.0378763	Cd47/Slc7a6/H2-M3/Tspo/Rora/Pkd2/Cyp1b1	7	GO_BP	down
GO:0034599	cellular response to oxidative stress	14/871	243/28891	0.0161344	0.0585332	0.037957	Hif1a/Pnpla8/Ep300/Prkn/Bnip3/Atm/Fbln5/Egfr/Ptprk/Setx/Trpm2/Prkd1/Cyp1b1/Slc8a1	14	GO_BP	down
GO:0032675	regulation of interleukin-6 production	11/871	173/28891	0.0161468	0.0585379	0.03796	Capn2/Stat3/Rigi/Cd47/Lgals9/Zbtb20/Ptpn22/Ccn1/Trim30a/Lpl/Aqp4	11	GO_BP	down
GO:0046849	bone remodeling	8/871	108/28891	0.0165758	0.0600148	0.0389177	Ext1/Notch2/Rassf2/Lrrk1/Egfr/Prkca/Sfrp1/Ptn	8	GO_BP	down
GO:0030330	DNA damage response, signal transduction by p53 class mediator	6/871	68/28891	0.0165886	0.0600148	0.0389177	Dyrk1a/Hipk2/Sp100/Atm/Atr/Cd44	6	GO_BP	down
GO:0033363	secretory granule organization	6/871	68/28891	0.0165886	0.0600148	0.0389177	Ap3b1/Ap1g1/Vps13b/Abcg1/Abca1/Srgn	6	GO_BP	down
GO:0033044	regulation of chromosome organization	14/871	244/28891	0.0166599	0.0601895	0.039031	Cct4/Arid1b/Cdk5rap2/Smarcc2/Bcl7a/Map3k4/Anapc1/Atm/Atr/Rad50/Nbn/Naf1/Prkcq/Ylpm1	14	GO_BP	down
GO:1903828	negative regulation of protein localization	14/871	244/28891	0.0166599	0.0601895	0.039031	Otud7b/Prkn/Sp100/Bcl2l1/Abhd17c/Sfrp1/Mfhas1/Apoe/Astn2/Pkdcc/Fbn1/Lypd1/Dclk1/Angpt1	14	GO_BP	down
GO:0010922	positive regulation of phosphatase activity	4/871	33/28891	0.0167686	0.0603098	0.039109	Ppp1r12a/Npnt/Magi2/Itga1	4	GO_BP	down
GO:0021697	cerebellar cortex formation	4/871	33/28891	0.0167686	0.0603098	0.039109	Atxn2/Herc1/Rora/Ophn1	4	GO_BP	down
GO:0048566	embryonic digestive tract development	4/871	33/28891	0.0167686	0.0603098	0.039109	Gli3/Pkdcc/Gli2/Pcsk5	4	GO_BP	down
GO:0090594	inflammatory response to wounding	4/871	33/28891	0.0167686	0.0603098	0.039109	Hif1a/Stat3/Cd44/Grn	4	GO_BP	down
GO:0140058	neuron projection arborization	4/871	33/28891	0.0167686	0.0603098	0.039109	Nlgn1/Grip1/Ptn/Sema3a	4	GO_BP	down
GO:2001014	regulation of skeletal muscle cell differentiation	4/871	33/28891	0.0167686	0.0603098	0.039109	Ddx17/Hdac4/Rbfox1/Hdac9	4	GO_BP	down
GO:0008016	regulation of heart contraction	12/871	197/28891	0.0167854	0.0603098	0.039109	Flna/Pik3r1/Gaa/Hdac4/Prkca/Pde4d/Fgf13/Adm/Dsg2/Sema3a/Adra1a/Slc8a1	12	GO_BP	down
GO:0043200	response to amino acid	12/871	197/28891	0.0167854	0.0603098	0.039109	Capn2/Col4a1/Ep300/Prkn/Cpeb3/Bcl2l1/Cpeb1/Egfr/Igf1r/Rragd/Col6a1/Zeb1	12	GO_BP	down
GO:0031297	replication fork processing	5/871	50/28891	0.0170384	0.061014	0.0395657	Wrn/Atr/Rad50/Nbn/Samhd1	5	GO_BP	down
GO:0032210	regulation of telomere maintenance via telomerase	5/871	50/28891	0.0170384	0.061014	0.0395657	Cct4/Map3k4/Atm/Atr/Prkcq	5	GO_BP	down
GO:0032467	positive regulation of cytokinesis	5/871	50/28891	0.0170384	0.061014	0.0395657	Pkp4/Cspp1/Prkce/Igf1r/Cdc14b	5	GO_BP	down
GO:1903426	regulation of reactive oxygen species biosynthetic process	5/871	50/28891	0.0170384	0.061014	0.0395657	Stat3/Pikfyve/Prkn/Hdac4/Abcb7	5	GO_BP	down
GO:0030500	regulation of bone mineralization	7/871	88/28891	0.0170396	0.061014	0.0395657	Hif1a/Bmpr2/Ccn1/Srgn/Pkdcc/Ptn/Slc8a1	7	GO_BP	down
GO:0044270	cellular nitrogen compound catabolic process	22/871	446/28891	0.0172796	0.0617886	0.040068	Pabpc1/Tnrc6b/Rnaset2b/Pan3/Qki/Zc3h14/Upf3b/Trnt1/Hint1/Upf2/Traf5/Dpyd/Cpeb3/Atm/Nbas/Naf1/Samhd1/Ang/Zfp36l2/Xdh/Zfp36l1/Vim	22	GO_BP	down
GO:0046700	heterocycle catabolic process	22/871	446/28891	0.0172796	0.0617886	0.040068	Pabpc1/Tnrc6b/Rnaset2b/Pan3/Qki/Zc3h14/Upf3b/Trnt1/Hint1/Upf2/Traf5/Dpyd/Cpeb3/Atm/Nbas/Naf1/Samhd1/Ang/Zfp36l2/Xdh/Zfp36l1/Vim	22	GO_BP	down
GO:0022898	regulation of transmembrane transporter activity	16/871	294/28891	0.0173533	0.0620098	0.0402115	Nedd4/Ank3/Slmap/Ahnak/Ywhah/Prkca/Pde4d/Fgf13/Fgf14/Gem/Pkd2/Tcaf2/Nlgn1/Grip1/Grp/Myo5a	16	GO_BP	down
GO:0046890	regulation of lipid biosynthetic process	13/871	222/28891	0.0176943	0.0631424	0.0409459	Capn2/Nr3c1/Dcaf5/Zbtb20/Abcg1/Scap/Ccn1/Sik2/Tspo/Igf1r/Apoe/Ldlr/C3	13	GO_BP	down
GO:0099111	microtubule-based transport	13/871	222/28891	0.0176943	0.0631424	0.0409459	Ank3/Hif1a/Ap3b1/Dync2h1/Flot2/Dync2li1/Wdpcp/Arhgap21/Trak2/Myo5a/Invs/Dync1i1/Aqp4	13	GO_BP	down
GO:0007032	endosome organization	6/871	69/28891	0.0177198	0.0631901	0.0409768	Hook3/Tmcc1/Vti1a/Hook2/Prkn/Washc4	6	GO_BP	down
GO:0042445	hormone metabolic process	14/871	246/28891	0.0177501	0.0632549	0.0410189	Hif1a/Nr3c1/Dhrs7/Med1/Stat5b/Cpq/Adm/Kcnma1/Igf1r/Ghr/Cyp1b1/Pcsk5/Schip1/Scg5	14	GO_BP	down
GO:2000779	regulation of double-strand break repair	9/871	131/28891	0.0179294	0.0638505	0.0414051	Dek/Arid1b/Mbtd1/Smarcc2/Bcl7a/Rif1/Trp53bp1/Atr/Spidr	9	GO_BP	down
GO:0040014	regulation of multicellular organism growth	7/871	89/28891	0.0180293	0.0641628	0.0416076	Ncor1/Stat3/Atxn2/Mbd5/Stat5b/Stat5a/Ghr	7	GO_BP	down
GO:0002687	positive regulation of leukocyte migration	11/871	176/28891	0.0181158	0.0644269	0.0417789	Cd47/Lgals9/Pik3r1/Ptprj/Mospd2/Vegfb/Ccl19/Mcu/Cd99l2/Swap70/Ptn	11	GO_BP	down
GO:0031668	cellular response to extracellular stimulus	15/871	271/28891	0.0181545	0.0645205	0.0418396	Crebbp/Impact/Med1/Ep300/Mtmr3/Gsdmd/Fnip1/Plec/Itga6/Wrn/Vps41/Sik2/Rragd/Prkd1/Lpl	15	GO_BP	down
GO:0030593	neutrophil chemotaxis	8/871	110/28891	0.0183207	0.0648837	0.0420751	Gbf1/Pikfyve/Prkca/Mospd2/Pde4d/Ccl19/Mcu/Itga1	8	GO_BP	down
GO:0008340	determination of adult lifespan	5/871	51/28891	0.0184353	0.0648837	0.0420751	Trp63/Atm/Wrn/Large1/Hdac9	5	GO_BP	down
GO:0030219	megakaryocyte differentiation	5/871	51/28891	0.0184353	0.0648837	0.0420751	Med1/Flna/Ep300/Cnot4/Rabgap1l	5	GO_BP	down
GO:0030520	intracellular estrogen receptor signaling pathway	5/871	51/28891	0.0184353	0.0648837	0.0420751	Ddx17/Med1/Trp63/Ar/Cyp7b1	5	GO_BP	down
GO:0060421	positive regulation of heart growth	5/871	51/28891	0.0184353	0.0648837	0.0420751	Nr3c1/Mapk14/Ep300/Tgfbr3/Zfpm2	5	GO_BP	down
GO:0061005	cell differentiation involved in kidney development	5/871	51/28891	0.0184353	0.0648837	0.0420751	Ext1/Notch2/Gli3/Myo1e/Basp1	5	GO_BP	down
GO:0003184	pulmonary valve morphogenesis	3/871	19/28891	0.018455	0.0648837	0.0420751	Notch2/Robo1/Robo2	3	GO_BP	down
GO:0010644	cell communication by electrical coupling	3/871	19/28891	0.018455	0.0648837	0.0420751	Ank3/Pde4d/Slc8a1	3	GO_BP	down
GO:0021924	cell proliferation in external granule layer	3/871	19/28891	0.018455	0.0648837	0.0420751	Rere/Rora/Gli2	3	GO_BP	down
GO:0021930	cerebellar granule cell precursor proliferation	3/871	19/28891	0.018455	0.0648837	0.0420751	Rere/Rora/Gli2	3	GO_BP	down
GO:0032516	positive regulation of phosphoprotein phosphatase activity	3/871	19/28891	0.018455	0.0648837	0.0420751	Ppp1r12a/Magi2/Itga1	3	GO_BP	down
GO:0034698	response to gonadotropin	3/871	19/28891	0.018455	0.0648837	0.0420751	Tgfbr3/Pde4d/Efna5	3	GO_BP	down
GO:0045793	positive regulation of cell size	3/871	19/28891	0.018455	0.0648837	0.0420751	Ep300/Akt3/Prkd1	3	GO_BP	down
GO:0070486	leukocyte aggregation	3/871	19/28891	0.018455	0.0648837	0.0420751	Cd47/Cd44/Gstp1	3	GO_BP	down
GO:0098696	regulation of neurotransmitter receptor localization to postsynaptic specialization membrane	3/871	19/28891	0.018455	0.0648837	0.0420751	Nbea/Neto2/Magi2	3	GO_BP	down
GO:1901570	fatty acid derivative biosynthetic process	3/871	19/28891	0.018455	0.0648837	0.0420751	Ggt5/Alox15/Pam	3	GO_BP	down
GO:0002313	mature B cell differentiation involved in immune response	4/871	34/28891	0.0185624	0.0651301	0.0422349	Notch2/Lgals8/Lgals1/Dock10	4	GO_BP	down
GO:0051973	positive regulation of telomerase activity	4/871	34/28891	0.0185624	0.0651301	0.0422349	Cct4/Map3k4/Naf1/Prkcq	4	GO_BP	down
GO:1904752	regulation of vascular associated smooth muscle cell migration	4/871	34/28891	0.0185624	0.0651301	0.0422349	Iqgap1/Myo5a/Dock4/Pcsk5	4	GO_BP	down
GO:0002761	regulation of myeloid leukocyte differentiation	10/871	154/28891	0.0186104	0.065255	0.0423158	Notch2/Rassf2/Pik3r1/Tjp2/Prkca/Stat5a/Sfrp1/Fbn1/Zfp36l1/Lrrc17	10	GO_BP	down
GO:0001841	neural tube formation	9/871	132/28891	0.0187455	0.0656847	0.0425945	Luzp1/Hif1a/Kdm2a/Prkacb/Stk3/Ski/Adm/Sfrp1/Fzd2	9	GO_BP	down
GO:0051146	striated muscle cell differentiation	18/871	347/28891	0.0188431	0.0659822	0.0427875	Capn2/Nr3c1/Bnip2/Mapk14/Ep300/Plec/Hdac4/Flii/Large1/Ski/Myl9/Pmp22/Lmod1/Hdac9/Prkd1/Myh11/Adra1a/Slc8a1	18	GO_BP	down
GO:1901654	response to ketone	13/871	224/28891	0.0189034	0.0661493	0.0428958	Nr3c1/Ncoa2/Ep300/Tgfbr3/Prkce/Bcl2l1/Ccl19/Ar/Efna5/Adcy2/Grip1/Prkd1/Gnai1	13	GO_BP	down
GO:0001738	morphogenesis of a polarized epithelium	7/871	90/28891	0.0190587	0.0666037	0.0431905	Trp63/Wdpcp/Sfrp1/Ophn1/Astn2/Gpc3/Fzd2	7	GO_BP	down
GO:0006942	regulation of striated muscle contraction	7/871	90/28891	0.0190587	0.0666037	0.0431905	Hdac4/Pde4d/Fgf13/Dsg2/Prkd1/Adra1a/Slc8a1	7	GO_BP	down
GO:0046660	female sex differentiation	10/871	155/28891	0.0193768	0.0676252	0.0438529	Trp63/Stat5b/Bcl2l1/Atm/Pde4d/Stat5a/Sfrp1/Angpt1/Schip1/Zfpm2	10	GO_BP	down
GO:0098876	vesicle-mediated transport to the plasma membrane	10/871	155/28891	0.0193768	0.0676252	0.0438529	Ank3/Exoc4/Vti1a/Exoc6b/Rab34/Vps13b/Dennd1a/Snx30/Pkdcc/Grip1	10	GO_BP	down
GO:0006402	mRNA catabolic process	14/871	249/28891	0.0194859	0.0679153	0.044041	Pabpc1/Tnrc6b/Pan3/Qki/Zc3h14/Upf3b/Upf2/Traf5/Cpeb3/Atm/Nbas/Zfp36l2/Zfp36l1/Vim	14	GO_BP	down
GO:0006813	potassium ion transport	14/871	249/28891	0.0194859	0.0679153	0.044041	Gnaq/Nedd4/Ank3/Flna/Plcb4/Cd63/Slc9a9/Large1/Kcnma1/Kcnk2/Pkd2/Grip1/Grp/Slc24a3	14	GO_BP	down
GO:0002367	cytokine production involved in immune response	11/871	178/28891	0.0195241	0.067981	0.0440836	H2-D1/H2-K1/H2-T22/Rigi/B2m/H2-Q4/H2-Q7/H2-Q6/H2-Q2/Angpt1/H2-M2	11	GO_BP	down
GO:0050866	negative regulation of cell activation	13/871	225/28891	0.0195308	0.067981	0.0440836	Bcr/Lgals9/Ptpn22/Itch/Atm/Gli3/Cd44/Grn/Il20rb/Cblb/Sfrp1/Apoe/Ldlr	13	GO_BP	down
GO:0015748	organophosphate ester transport	9/871	133/28891	0.0195883	0.0680909	0.0441548	Atp9b/Cd47/Abcg1/Abcc1/Abca1/Apoe/Ldlr/Abcc5/Plscr2	9	GO_BP	down
GO:1902414	protein localization to cell junction	9/871	133/28891	0.0195883	0.0680909	0.0441548	Nectin1/Flna/Nbea/Tjp2/Pclo/Neto2/Nlgn1/Grip1/Magi2	9	GO_BP	down
GO:0009299	mRNA transcription	5/871	52/28891	0.0199055	0.0689646	0.0447214	Stat3/Ap3b1/Ncoa2/Med1/Flna	5	GO_BP	down
GO:0010762	regulation of fibroblast migration	5/871	52/28891	0.0199055	0.0689646	0.0447214	Braf/Prkce/Wdpcp/Pak3/Slc8a1	5	GO_BP	down
GO:0014037	Schwann cell differentiation	5/871	52/28891	0.0199055	0.0689646	0.0447214	Plec/Itgb4/Sos1/Ski/Pmp22	5	GO_BP	down
GO:0032728	positive regulation of interferon-beta production	5/871	52/28891	0.0199055	0.0689646	0.0447214	Rigi/Zbtb20/Ptpn22/Irf7/Trim56	5	GO_BP	down
GO:0050687	negative regulation of defense response to virus	5/871	52/28891	0.0199055	0.0689646	0.0447214	Pcbp2/Ptpn22/Itch/Dhx58/Trim30a	5	GO_BP	down
GO:0001656	metanephros development	7/871	91/28891	0.0201285	0.0695414	0.0450954	Pds5a/Greb1l/Gli3/Fras1/Fbn1/Gpc3/Robo2	7	GO_BP	down
GO:0090398	cellular senescence	7/871	91/28891	0.0201285	0.0695414	0.0450954	Mapk14/Kat6a/Trp63/Map3k3/B2m/Wrn/Akt3	7	GO_BP	down
GO:0008347	glial cell migration	6/871	71/28891	0.0201384	0.0695414	0.0450954	Tiam1/Gli3/Tspo/Ptprz1/Pmp22/Vim	6	GO_BP	down
GO:0021695	cerebellar cortex development	6/871	71/28891	0.0201384	0.0695414	0.0450954	Atxn2/Rere/Herc1/Rora/Ophn1/Gli2	6	GO_BP	down
GO:0050771	negative regulation of axonogenesis	6/871	71/28891	0.0201384	0.0695414	0.0450954	Ttc3/Fgf13/Trak2/Epha7/Sema3a/Sema3e	6	GO_BP	down
GO:0008344	adult locomotory behavior	8/871	112/28891	0.0201933	0.0696849	0.0451885	Ntan1/Prkn/Hipk2/Fgf14/Kcnma1/Pmp22/Pcdh15/Dmrt3	8	GO_BP	down
GO:0030902	hindbrain development	11/871	179/28891	0.0202579	0.0698359	0.0452864	Smad1/Atxn2/Rere/Herc1/Flna/Ascl1/Igf1r/Rora/Plxna2/Ophn1/Gli2	11	GO_BP	down
GO:0031667	response to nutrient levels	21/871	427/28891	0.0202637	0.0698359	0.0452864	Crebbp/Impact/Med1/Mapk14/Ep300/Mtmr3/Tbc1d5/Fnip1/Plec/Dpyd/Wrn/Vps41/Sik2/Rasal2/Rragd/Apoe/Ghr/Fbn1/Ldlr/Prkd1/Lpl	21	GO_BP	down
GO:0031109	microtubule polymerization or depolymerization	9/871	134/28891	0.0204582	0.0701333	0.0454793	Mid1/Eml4/Dyrk1a/Map4/Cdk5rap2/Pde4dip/Fgf13/Togaram1/Nckap5	9	GO_BP	down
GO:0002092	positive regulation of receptor internalization	4/871	35/28891	0.0204706	0.0701333	0.0454793	Cd63/Tbc1d5/Magi2/Angpt1	4	GO_BP	down
GO:0003209	cardiac atrium morphogenesis	4/871	35/28891	0.0204706	0.0701333	0.0454793	Notch2/Bmpr2/Sos1/Ccn1	4	GO_BP	down
GO:0009048	dosage compensation by inactivation of X chromosome	4/871	35/28891	0.0204706	0.0701333	0.0454793	Jarid2/Kansl1/Lrif1/Pcgf5	4	GO_BP	down
GO:0010863	positive regulation of phospholipase C activity	4/871	35/28891	0.0204706	0.0701333	0.0454793	Gnaq/Lpar1/Ang/Adra1a	4	GO_BP	down
GO:0035116	embryonic hindlimb morphogenesis	4/871	35/28891	0.0204706	0.0701333	0.0454793	Med1/Trp63/Gpc3/Zbtb16	4	GO_BP	down
GO:0045616	regulation of keratinocyte differentiation	4/871	35/28891	0.0204706	0.0701333	0.0454793	Med1/Trp63/Macroh2a2/Zfp36l1	4	GO_BP	down
GO:0048714	positive regulation of oligodendrocyte differentiation	4/871	35/28891	0.0204706	0.0701333	0.0454793	Qki/Ptpra/Ptprz1/Ptn	4	GO_BP	down
GO:0090322	regulation of superoxide metabolic process	4/871	35/28891	0.0204706	0.0701333	0.0454793	Aatf/Fbln5/Egfr/Gstp1	4	GO_BP	down
GO:0140694	non-membrane-bounded organelle assembly	20/871	402/28891	0.0207058	0.0708926	0.0459717	Ncor1/Prrc2c/G3bp1/Ddx6/Pan3/Atxn2/Rps27/Stag1/Flna/Cdk5rap2/Ep300/Ddb1/Plec/Flii/Mospd2/Rnf213/Myl9/Trim37/Lmod1/Prkd1	20	GO_BP	down
GO:0006260	DNA replication	15/871	276/28891	0.021007	0.0717811	0.0465478	Rbbp6/Ankrd17/Pds5a/Dtd1/Rfc1/Wrn/Atr/Egfr/Rad50/Nbn/Samhd1/Ccdc88a/Polg2/Pola1/Gli2	15	GO_BP	down
GO:0010970	transport along microtubule	11/871	180/28891	0.0210118	0.0717811	0.0465478	Ank3/Hif1a/Ap3b1/Dync2h1/Flot2/Dync2li1/Wdpcp/Arhgap21/Trak2/Myo5a/Dync1i1	11	GO_BP	down
GO:0008630	intrinsic apoptotic signaling pathway in response to DNA damage	8/871	113/28891	0.0211789	0.0717811	0.0465478	Trp63/Ep300/Pik3r1/Hipk2/Bcl2l1/Atm/Cd44/Crip1	8	GO_BP	down
GO:0018107	peptidyl-threonine phosphorylation	8/871	113/28891	0.0211789	0.0717811	0.0465478	Dyrk1a/Hipk2/Prkca/Map3k10/Prkag2/Stox1/Akt3/Prkd1	8	GO_BP	down
GO:0030516	regulation of axon extension	8/871	113/28891	0.0211789	0.0717811	0.0465478	Ttc3/Bmpr2/Ep300/Cdh4/Arhgap32/Apoe/Sema3a/Sema3e	8	GO_BP	down
GO:0021534	cell proliferation in hindbrain	3/871	20/28891	0.0212348	0.0717811	0.0465478	Rere/Rora/Gli2	3	GO_BP	down
GO:0021694	cerebellar Purkinje cell layer formation	3/871	20/28891	0.0212348	0.0717811	0.0465478	Atxn2/Herc1/Rora	3	GO_BP	down
GO:0030050	vesicle transport along actin filament	3/871	20/28891	0.0212348	0.0717811	0.0465478	Fnbp1l/Myo1e/Myo5a	3	GO_BP	down
GO:0032230	positive regulation of synaptic transmission, GABAergic	3/871	20/28891	0.0212348	0.0717811	0.0465478	Prkce/Nlgn1/Adra1a	3	GO_BP	down
GO:0033962	P-body assembly	3/871	20/28891	0.0212348	0.0717811	0.0465478	Ddx6/Pan3/Atxn2	3	GO_BP	down
GO:0035065	regulation of histone acetylation	3/871	20/28891	0.0212348	0.0717811	0.0465478	Auts2/Dek/Ep300	3	GO_BP	down
GO:0043691	reverse cholesterol transport	3/871	20/28891	0.0212348	0.0717811	0.0465478	Abcg1/Abca1/Apoe	3	GO_BP	down
GO:0046827	positive regulation of protein export from nucleus	3/871	20/28891	0.0212348	0.0717811	0.0465478	Prkd1/Wipf1/Camk4	3	GO_BP	down
GO:0072376	protein activation cascade	3/871	20/28891	0.0212348	0.0717811	0.0465478	Flna/Mvp/Rasal2	3	GO_BP	down
GO:1902916	positive regulation of protein polyubiquitination	3/871	20/28891	0.0212348	0.0717811	0.0465478	Prkn/Ptpn22/Birc2	3	GO_BP	down
GO:1905146	lysosomal protein catabolic process	3/871	20/28891	0.0212348	0.0717811	0.0465478	Vps13a/Grn/Ldlr	3	GO_BP	down
GO:2000758	positive regulation of peptidyl-lysine acetylation	3/871	20/28891	0.0212348	0.0717811	0.0465478	Auts2/Dek/Ep300	3	GO_BP	down
GO:0031110	regulation of microtubule polymerization or depolymerization	7/871	92/28891	0.0212395	0.0717811	0.0465478	Mid1/Eml4/Dyrk1a/Cdk5rap2/Pde4dip/Fgf13/Togaram1	7	GO_BP	down
GO:0039531	regulation of viral-induced cytoplasmic pattern recognition receptor signaling pathway	7/871	92/28891	0.0212395	0.0717811	0.0465478	Stmp1/Ankrd17/Ptpn22/Dhx58/Trim30a/Ddx60/Prkd1	7	GO_BP	down
GO:0046209	nitric oxide metabolic process	7/871	92/28891	0.0212395	0.0717811	0.0465478	Cd47/Slc7a6/H2-M3/Tspo/Rora/Pkd2/Cyp1b1	7	GO_BP	down
GO:0009913	epidermal cell differentiation	14/871	252/28891	0.0213471	0.0720291	0.0467086	Bcr/Med1/Trp63/Sav1/Plec/Macroh2a2/Krt7/Kcnma1/Kazn/Pou2f3/Wdpcp/Zfp36l1/Pcdh15/Gli2	14	GO_BP	down
GO:0007368	determination of left/right symmetry	9/871	135/28891	0.0213555	0.0720291	0.0467086	Hif1a/Notch2/Kdm2a/Dync2h1/Dync2li1/Bicc1/Pkd2/Invs/Pcsk5	9	GO_BP	down
GO:0071621	granulocyte chemotaxis	9/871	135/28891	0.0213555	0.0720291	0.0467086	Gbf1/Pikfyve/Ptprj/Prkca/Mospd2/Pde4d/Ccl19/Mcu/Itga1	9	GO_BP	down
GO:0032608	interferon-beta production	6/871	72/28891	0.0214279	0.0720291	0.0467086	Crebbp/Rigi/Zbtb20/Ptpn22/Irf7/Trim56	6	GO_BP	down
GO:0032648	regulation of interferon-beta production	6/871	72/28891	0.0214279	0.0720291	0.0467086	Crebbp/Rigi/Zbtb20/Ptpn22/Irf7/Trim56	6	GO_BP	down
GO:0055117	regulation of cardiac muscle contraction	6/871	72/28891	0.0214279	0.0720291	0.0467086	Hdac4/Pde4d/Fgf13/Dsg2/Adra1a/Slc8a1	6	GO_BP	down
GO:0003254	regulation of membrane depolarization	5/871	53/28891	0.0214505	0.0720291	0.0467086	Ank3/Slmap/Oga/B2m/Tspo	5	GO_BP	down
GO:0030865	cortical cytoskeleton organization	5/871	53/28891	0.0214505	0.0720291	0.0467086	Iqgap1/Plec/Fmnl2/Actn1/Nlgn1	5	GO_BP	down
GO:0031124	mRNA 3'-end processing	5/871	53/28891	0.0214505	0.0720291	0.0467086	Zc3h14/Cpsf6/Virma/Scaf8/Zfp36l1	5	GO_BP	down
GO:1900542	regulation of purine nucleotide metabolic process	5/871	53/28891	0.0214505	0.0720291	0.0467086	Stat3/Prkn/Bcl2l1/Pdk3/Tspo	5	GO_BP	down
GO:0097193	intrinsic apoptotic signaling pathway	17/871	327/28891	0.0216039	0.0724976	0.0470124	Hif1a/Trp63/Hint1/Ep300/Prkn/Pik3r1/Hipk2/Bnip3/Bcl2l1/Atm/Wwox/Cd44/Prkca/Nbn/Crip1/Cyp1b1/Rnf183	17	GO_BP	down
GO:0071230	cellular response to amino acid stimulus	11/871	181/28891	0.0217862	0.0730625	0.0473788	Capn2/Col4a1/Ep300/Prkn/Cpeb3/Bcl2l1/Cpeb1/Egfr/Rragd/Col6a1/Zeb1	11	GO_BP	down
GO:0052547	regulation of peptidase activity	22/871	457/28891	0.0220653	0.0739512	0.0479551	Stat3/Svbp/Tank/Trp63/Ep300/Fnip1/Renbp/Cd44/Serpinb9/Grn/Ccn1/Rps6ka3/Psmb8/Xdh/Serpina3i/Serpinf1/Epha7/Robo1/Serpina3g/Gpc3/Antxr1/Wfikkn2	22	GO_BP	down
GO:0046889	positive regulation of lipid biosynthetic process	8/871	114/28891	0.022198	0.0743009	0.0481819	Capn2/Zbtb20/Abcg1/Scap/Ccn1/Igf1r/Apoe/Ldlr	8	GO_BP	down
GO:1905477	positive regulation of protein localization to membrane	8/871	114/28891	0.022198	0.0743009	0.0481819	Ank3/Prkn/Egfr/Itga3/Tcaf2/Grip1/Myo5a/Ptn	8	GO_BP	down
GO:0015914	phospholipid transport	7/871	93/28891	0.0223924	0.0748557	0.0485416	Atp9b/Abcg1/Abcc1/Abca1/Apoe/Ldlr/Plscr2	7	GO_BP	down
GO:0050766	positive regulation of phagocytosis	7/871	93/28891	0.0223924	0.0748557	0.0485416	Bcr/Cd47/Ptprj/Myo18a/Il15ra/Pros1/C3	7	GO_BP	down
GO:0032607	interferon-alpha production	4/871	36/28891	0.022495	0.0749595	0.0486089	Ap3b1/Rigi/Ptpn22/Irf7	4	GO_BP	down
GO:0055094	response to lipoprotein particle	4/871	36/28891	0.022495	0.0749595	0.0486089	Hmgcs1/Apoe/Ldlr/Lpl	4	GO_BP	down
GO:0070316	regulation of G0 to G1 transition	4/871	36/28891	0.022495	0.0749595	0.0486089	Arid1b/Med1/Smarcc2/Bcl7a	4	GO_BP	down
GO:0090075	relaxation of muscle	4/871	36/28891	0.022495	0.0749595	0.0486089	Pde4d/Kcnma1/Irag1/Slc8a1	4	GO_BP	down
GO:2000515	negative regulation of CD4-positive, alpha-beta T cell activation	4/871	36/28891	0.022495	0.0749595	0.0486089	Lgals9/Itch/Cd44/Cblb	4	GO_BP	down
GO:0032635	interleukin-6 production	11/871	182/28891	0.0225812	0.0751512	0.0487332	Capn2/Stat3/Rigi/Cd47/Lgals9/Zbtb20/Ptpn22/Ccn1/Trim30a/Lpl/Aqp4	11	GO_BP	down
GO:0035148	tube formation	11/871	182/28891	0.0225812	0.0751512	0.0487332	Luzp1/Hif1a/Kdm2a/Prkacb/Stk3/Ski/Adm/Sfrp1/Sdccag8/Eda/Fzd2	11	GO_BP	down
GO:0030239	myofibril assembly	6/871	73/28891	0.0227719	0.0756895	0.0490823	Ep300/Plec/Flii/Myl9/Lmod1/Prkd1	6	GO_BP	down
GO:0099518	vesicle cytoskeletal trafficking	6/871	73/28891	0.0227719	0.0756895	0.0490823	Ap3b1/Fnbp1l/Myo1e/Trak2/Myo5a/Dync1i1	6	GO_BP	down
GO:0002695	negative regulation of leukocyte activation	12/871	206/28891	0.0229067	0.0760894	0.0493416	Bcr/Lgals9/Ptpn22/Itch/Atm/Gli3/Cd44/Grn/Il20rb/Cblb/Sfrp1/Ldlr	12	GO_BP	down
GO:0006140	regulation of nucleotide metabolic process	5/871	54/28891	0.0230714	0.0763455	0.0495077	Stat3/Prkn/Bcl2l1/Pdk3/Tspo	5	GO_BP	down
GO:0010823	negative regulation of mitochondrion organization	5/871	54/28891	0.0230714	0.0763455	0.0495077	Prkn/Bnip3/Bcl2l1/Mfn1/Tspo	5	GO_BP	down
GO:0015804	neutral amino acid transport	5/871	54/28891	0.0230714	0.0763455	0.0495077	Slc38a2/Slc7a6/Mfsd12/Slc38a6/Slc7a7	5	GO_BP	down
GO:0045005	DNA-templated DNA replication maintenance of fidelity	5/871	54/28891	0.0230714	0.0763455	0.0495077	Wrn/Atr/Rad50/Nbn/Samhd1	5	GO_BP	down
GO:0045773	positive regulation of axon extension	5/871	54/28891	0.0230714	0.0763455	0.0495077	Bmpr2/Ep300/Cdh4/Arhgap32/Apoe	5	GO_BP	down
GO:0048066	developmental pigmentation	5/871	54/28891	0.0230714	0.0763455	0.0495077	Gnaq/Ap1g1/Cd63/Gli3/Myo5a	5	GO_BP	down
GO:0009791	post-embryonic development	9/871	137/28891	0.0232344	0.0768364	0.0498261	Gnaq/Chst11/Atm/Large1/Zfp950/Myo1e/Invs/Schip1/Slc8a1	9	GO_BP	down
GO:0008037	cell recognition	10/871	160/28891	0.023559	0.0777593	0.0504245	Cct4/Ext1/Cd47/Cadm1/Myo18a/Ccl19/Ptprz1/Robo1/Sema3a/Robo2	10	GO_BP	down
GO:0006094	gluconeogenesis	7/871	94/28891	0.0235877	0.0777593	0.0504245	Hif1a/Nr3c1/Supt20/Ppp4r3a/Tpi1/Ep300/Ddb1	7	GO_BP	down
GO:0030512	negative regulation of transforming growth factor beta receptor signaling pathway	7/871	94/28891	0.0235877	0.0777593	0.0504245	Chst11/Tgfbr3/Bcl9l/Ski/Ldlrad4/Fbn1/Wfikkn2	7	GO_BP	down
GO:0051341	regulation of oxidoreductase activity	7/871	94/28891	0.0235877	0.0777593	0.0504245	Lgals9/Prkn/Egfr/Gstp1/Apoe/Myo5a/Fcer2a	7	GO_BP	down
GO:2001057	reactive nitrogen species metabolic process	7/871	94/28891	0.0235877	0.0777593	0.0504245	Cd47/Slc7a6/H2-M3/Tspo/Rora/Pkd2/Cyp1b1	7	GO_BP	down
GO:0060675	ureteric bud morphogenesis	6/871	74/28891	0.0241715	0.0790953	0.0512909	Npnt/Greb1l/Gli3/Cd44/Hs3st3a1/Gpc3	6	GO_BP	down
GO:1904029	regulation of cyclin-dependent protein kinase activity	6/871	74/28891	0.0241715	0.0790953	0.0512909	Cdk5rap2/Ccnd3/Egfr/Pkd1/Pkd2/Stox1	6	GO_BP	down
GO:1990266	neutrophil migration	9/871	138/28891	0.0242168	0.0790953	0.0512909	Gbf1/Pikfyve/Prkca/Mospd2/Pde4d/Ccl19/Mcu/Cd99l2/Itga1	9	GO_BP	down
GO:0006896	Golgi to vacuole transport	3/871	21/28891	0.0242305	0.0790953	0.0512909	Vti1a/Ccdc91/Ap1g1	3	GO_BP	down
GO:0032495	response to muramyl dipeptide	3/871	21/28891	0.0242305	0.0790953	0.0512909	Mapk14/Ptpn22/Vim	3	GO_BP	down
GO:0035641	locomotory exploration behavior	3/871	21/28891	0.0242305	0.0790953	0.0512909	Prkce/Grn/Apoe	3	GO_BP	down
GO:0043117	positive regulation of vascular permeability	3/871	21/28891	0.0242305	0.0790953	0.0512909	Tjp2/Apoe/Angpt1	3	GO_BP	down
GO:0045540	regulation of cholesterol biosynthetic process	3/871	21/28891	0.0242305	0.0790953	0.0512909	Abcg1/Scap/Apoe	3	GO_BP	down
GO:0050884	neuromuscular process controlling posture	3/871	21/28891	0.0242305	0.0790953	0.0512909	Tmem150c/Gaa/Large1	3	GO_BP	down
GO:0060155	platelet dense granule organization	3/871	21/28891	0.0242305	0.0790953	0.0512909	Ap3b1/Ap1g1/Abca1	3	GO_BP	down
GO:0060340	positive regulation of type I interferon-mediated signaling pathway	3/871	21/28891	0.0242305	0.0790953	0.0512909	Irf7/Trim56/Zbp1	3	GO_BP	down
GO:0090050	positive regulation of cell migration involved in sprouting angiogenesis	3/871	21/28891	0.0242305	0.0790953	0.0512909	Map3k3/Akt3/Hdac9	3	GO_BP	down
GO:0106118	regulation of sterol biosynthetic process	3/871	21/28891	0.0242305	0.0790953	0.0512909	Abcg1/Scap/Apoe	3	GO_BP	down
GO:1900424	regulation of defense response to bacterium	3/871	21/28891	0.0242305	0.0790953	0.0512909	Lgals9/Rab34/Grn	3	GO_BP	down
GO:1903427	negative regulation of reactive oxygen species biosynthetic process	3/871	21/28891	0.0242305	0.0790953	0.0512909	Stat3/Prkn/Abcb7	3	GO_BP	down
GO:0031214	biomineral tissue development	11/871	184/28891	0.0242347	0.0790953	0.0512909	Nectin1/Hif1a/Bmpr2/Ccn1/Srgn/Pkdcc/Alox15/Slc24a3/Ptn/Gpc3/Slc8a1	11	GO_BP	down
GO:0043266	regulation of potassium ion transport	8/871	116/28891	0.0243392	0.0793866	0.0514798	Gnaq/Nedd4/Ank3/Flna/Plcb4/Cd63/Grip1/Grp	8	GO_BP	down
GO:1903050	regulation of proteolysis involved in protein catabolic process	13/871	232/28891	0.0243686	0.0794332	0.05151	Usp25/N4bp1/Btrc/Prkn/Hipk2/Pkd1/Ophn1/Apoe/Sh3rf3/Tgfb1i1/Ecscr/Rnf180/Cbfa2t3	13	GO_BP	down
GO:0030258	lipid modification	12/871	208/28891	0.0244654	0.0796989	0.0516823	Plpp3/Echdc1/Mapk14/Mtmr3/Fmo1/Plpp1/Synj2/Fig4/Rnf213/Agk/Plppr4/Alox15	12	GO_BP	down
GO:0030808	regulation of nucleotide biosynthetic process	4/871	37/28891	0.0246371	0.0799598	0.0518515	Stat3/Prkn/Bcl2l1/Pdk3	4	GO_BP	down
GO:0033146	regulation of intracellular estrogen receptor signaling pathway	4/871	37/28891	0.0246371	0.0799598	0.0518515	Med1/Trp63/Ar/Cyp7b1	4	GO_BP	down
GO:0043516	regulation of DNA damage response, signal transduction by p53 class mediator	4/871	37/28891	0.0246371	0.0799598	0.0518515	Dyrk1a/Atm/Atr/Cd44	4	GO_BP	down
GO:0045920	negative regulation of exocytosis	4/871	37/28891	0.0246371	0.0799598	0.0518515	Braf/Bcr/Lgals9/Prkn	4	GO_BP	down
GO:1900371	regulation of purine nucleotide biosynthetic process	4/871	37/28891	0.0246371	0.0799598	0.0518515	Stat3/Prkn/Bcl2l1/Pdk3	4	GO_BP	down
GO:1902745	positive regulation of lamellipodium organization	4/871	37/28891	0.0246371	0.0799598	0.0518515	Auts2/Pik3r1/Hdac4/Plce1	4	GO_BP	down
GO:0021517	ventral spinal cord development	5/871	55/28891	0.0247693	0.0802257	0.0520239	Dync2h1/Gli3/Ascl1/Gli2/Dmrt3	5	GO_BP	down
GO:0032330	regulation of chondrocyte differentiation	5/871	55/28891	0.0247693	0.0802257	0.0520239	Trps1/Gli3/Pkdcc/Gli2/Zbtb16	5	GO_BP	down
GO:0140374	antiviral innate immune response	5/871	55/28891	0.0247693	0.0802257	0.0520239	Senp7/Rigi/Trim25/Dhx58/Zbp1	5	GO_BP	down
GO:0032409	regulation of transporter activity	16/871	307/28891	0.0247867	0.0802257	0.0520239	Nedd4/Ank3/Slmap/Ahnak/Ywhah/Prkca/Pde4d/Fgf13/Fgf14/Gem/Pkd2/Tcaf2/Nlgn1/Grip1/Grp/Myo5a	16	GO_BP	down
GO:0045670	regulation of osteoclast differentiation	7/871	95/28891	0.0248263	0.0802257	0.0520239	Notch2/Rassf2/Pik3r1/Tjp2/Sfrp1/Fbn1/Lrrc17	7	GO_BP	down
GO:0051781	positive regulation of cell division	7/871	95/28891	0.0248263	0.0802257	0.0520239	Pkp4/Cspp1/Prkce/Vegfb/Igf1r/Cdc14b/Ptn	7	GO_BP	down
GO:1901879	regulation of protein depolymerization	7/871	95/28891	0.0248263	0.0802257	0.0520239	Mid1/Eml4/Flii/Fgf13/Shroom2/Lmod1/Swap70	7	GO_BP	down
GO:0051258	protein polymerization	15/871	282/28891	0.0248629	0.0802946	0.0520686	Dyrk1a/Map4/Cyrib/Cdk5rap2/Tmsb10/Pde4dip/Prkn/Prkce/Flii/Diaph2/Fgf13/Togaram1/Lmod1/Pak3/Alox15	15	GO_BP	down
GO:0003300	cardiac muscle hypertrophy	8/871	117/28891	0.0254622	0.0821791	0.0532906	Smad1/Nr3c1/Jarid2/Adk/Ep300/Tiam1/Prkca/Adra1a	8	GO_BP	down
GO:0061013	regulation of mRNA catabolic process	11/871	186/28891	0.0259746	0.0837814	0.0543297	Pabpc1/Tnrc6b/Pan3/Qki/Zc3h14/Traf5/Cpeb3/Nbas/Zfp36l2/Zfp36l1/Vim	11	GO_BP	down
GO:0030168	platelet activation	7/871	96/28891	0.0261087	0.0840585	0.0545093	Gnaq/Flna/Ptprj/Pdpn/Prkca/Prkcq/Apoe	7	GO_BP	down
GO:0032465	regulation of cytokinesis	7/871	96/28891	0.0261087	0.0840585	0.0545093	Pkp4/Cspp1/Prkce/Bcl2l1/Igf1r/Cdc14b/Ahctf1	7	GO_BP	down
GO:0070555	response to interleukin-1	7/871	96/28891	0.0261087	0.0840585	0.0545093	Tank/Cd47/Hdac4/Prkca/Ccl19/Rora/Zbp1	7	GO_BP	down
GO:0008406	gonad development	14/871	259/28891	0.026206	0.0843198	0.0546788	Fndc3a/Flna/Stat5b/Bcl2l1/Atm/Pde4d/Insl6/Stat5a/Ar/Sfrp1/Sema3a/Angpt1/Schip1/Zfpm2	14	GO_BP	down
GO:0030216	keratinocyte differentiation	10/871	163/28891	0.026361	0.0847144	0.0549347	Bcr/Med1/Trp63/Sav1/Plec/Macroh2a2/Krt7/Kazn/Pou2f3/Zfp36l1	10	GO_BP	down
GO:0051147	regulation of muscle cell differentiation	10/871	163/28891	0.026361	0.0847144	0.0549347	Smad1/Nr3c1/Bmpr2/Ankrd17/Mapk14/Ep300/Hdac4/Hdac9/Zeb1/Prkd1	10	GO_BP	down
GO:0007548	sex differentiation	17/871	335/28891	0.026467	0.0849507	0.0550879	Fndc3a/Flna/Trp63/Stat5b/Bcl2l1/Atm/Greb1l/Pde4d/Insl6/Stat5a/Ar/Sfrp1/Sema3a/Dmrt3/Angpt1/Schip1/Zfpm2	17	GO_BP	down
GO:0071496	cellular response to external stimulus	17/871	335/28891	0.026467	0.0849507	0.0550879	Crebbp/Impact/Med1/Tmem150c/Ep300/Mtmr3/Gsdmd/Cnn2/Fnip1/Plec/Itga6/Wrn/Vps41/Sik2/Rragd/Prkd1/Lpl	17	GO_BP	down
GO:0010828	positive regulation of glucose transmembrane transport	5/871	56/28891	0.0265455	0.0850984	0.0551837	Braf/Mapk14/Oga/Gpc3/C3	5	GO_BP	down
GO:0043507	positive regulation of JUN kinase activity	5/871	56/28891	0.0265455	0.0850984	0.0551837	Map3k4/Tiam1/Fgd4/Map3k10/Ccl19	5	GO_BP	down
GO:0031398	positive regulation of protein ubiquitination	8/871	118/28891	0.0266208	0.0852877	0.0553065	Mycbp2/Btrc/Prkn/Ptpn22/Birc2/Cblb/Rnf180/Angpt1	8	GO_BP	down
GO:0007219	Notch signaling pathway	11/871	187/28891	0.0268777	0.0859657	0.0557461	Stat3/Anxa4/Notch2/S1pr3/Trp63/Maml3/Maml2/Il6st/Ascl1/Robo1/Robo2	11	GO_BP	down
GO:0043409	negative regulation of MAPK cascade	11/871	187/28891	0.0268777	0.0859657	0.0557461	Ncor1/Ranbp9/Nf2/Ptpn22/Itch/Ptprj/Prkca/Gstp1/Igf1r/Sfrp1/Apoe	11	GO_BP	down
GO:0043243	positive regulation of protein-containing complex disassembly	4/871	38/28891	0.0268981	0.0859657	0.0557461	Oga/Bnip3/Igf1r/Setx	4	GO_BP	down
GO:0045023	G0 to G1 transition	4/871	38/28891	0.0268981	0.0859657	0.0557461	Arid1b/Med1/Smarcc2/Bcl7a	4	GO_BP	down
GO:0019080	viral gene expression	6/871	76/28891	0.0271405	0.0866346	0.0561799	Pcbp2/Brd4/Ep300/Sp100/Shfl/Pou2f3	6	GO_BP	down
GO:2000036	regulation of stem cell population maintenance	6/871	76/28891	0.0271405	0.0866346	0.0561799	Trp63/Bcl7a/Tead1/Sav1/Wdr43/Ptn	6	GO_BP	down
GO:0019439	aromatic compound catabolic process	22/871	467/28891	0.0272513	0.0866985	0.0562213	Pabpc1/Tnrc6b/Rnaset2b/Pan3/Qki/Zc3h14/Upf3b/Trnt1/Hint1/Upf2/Traf5/Dpyd/Cpeb3/Atm/Nbas/Naf1/Samhd1/Ang/Zfp36l2/Xdh/Zfp36l1/Vim	22	GO_BP	down
GO:0060972	left/right pattern formation	9/871	141/28891	0.0273408	0.0866985	0.0562213	Hif1a/Notch2/Kdm2a/Dync2h1/Dync2li1/Bicc1/Pkd2/Invs/Pcsk5	9	GO_BP	down
GO:0051899	membrane depolarization	7/871	97/28891	0.0274355	0.0866985	0.0562213	Ank3/Slmap/Oga/Ywhah/B2m/Tspo/Scn7a	7	GO_BP	down
GO:0061912	selective autophagy	7/871	97/28891	0.0274355	0.0866985	0.0562213	Lgals8/Prkn/Stk3/Gaa/Atm/Snx30/Rnf213	7	GO_BP	down
GO:1901992	positive regulation of mitotic cell cycle phase transition	7/871	97/28891	0.0274355	0.0866985	0.0562213	Kmt2e/Crebbp/Ankrd17/Brd4/Ube2e2/Egfr/Stox1	7	GO_BP	down
GO:0007039	protein catabolic process in the vacuole	3/871	22/28891	0.0274421	0.0866985	0.0562213	Vps13a/Grn/Ldlr	3	GO_BP	down
GO:0010842	retina layer formation	3/871	22/28891	0.0274421	0.0866985	0.0562213	Hipk2/Large1/Arl6	3	GO_BP	down
GO:0030810	positive regulation of nucleotide biosynthetic process	3/871	22/28891	0.0274421	0.0866985	0.0562213	Stat3/Prkn/Bcl2l1	3	GO_BP	down
GO:0031290	retinal ganglion cell axon guidance	3/871	22/28891	0.0274421	0.0866985	0.0562213	Efna5/Epha7/Robo2	3	GO_BP	down
GO:0032332	positive regulation of chondrocyte differentiation	3/871	22/28891	0.0274421	0.0866985	0.0562213	Gli3/Pkdcc/Zbtb16	3	GO_BP	down
GO:0045475	locomotor rhythm	3/871	22/28891	0.0274421	0.0866985	0.0562213	Ncor1/Ncoa2/Kcnma1	3	GO_BP	down
GO:0071625	vocalization behavior	3/871	22/28891	0.0274421	0.0866985	0.0562213	Auts2/Ext1/Gli3	3	GO_BP	down
GO:0090205	positive regulation of cholesterol metabolic process	3/871	22/28891	0.0274421	0.0866985	0.0562213	Abcg1/Scap/Apoe	3	GO_BP	down
GO:0099515	actin filament-based transport	3/871	22/28891	0.0274421	0.0866985	0.0562213	Fnbp1l/Myo1e/Myo5a	3	GO_BP	down
GO:1900006	positive regulation of dendrite development	3/871	22/28891	0.0274421	0.0866985	0.0562213	Iqgap1/Ptprz1/Ptn	3	GO_BP	down
GO:1900373	positive regulation of purine nucleotide biosynthetic process	3/871	22/28891	0.0274421	0.0866985	0.0562213	Stat3/Prkn/Bcl2l1	3	GO_BP	down
GO:2001044	regulation of integrin-mediated signaling pathway	3/871	22/28891	0.0274421	0.0866985	0.0562213	Flna/Cd63/Pcsk5	3	GO_BP	down
GO:0097305	response to alcohol	14/871	261/28891	0.0277336	0.0875665	0.0567842	Tgfbr3/Prkce/Bcl2l1/Prkca/Ccl19/Igf1r/Efna5/Spidr/Adcy2/Grip1/Gramd1b/Prkd1/Unc79/Gnai1	14	GO_BP	down
GO:0006282	regulation of DNA repair	12/871	212/28891	0.0278137	0.0876142	0.0568151	Dek/Eya4/Arid1b/Supt20/Mbtd1/Smarcc2/Bcl7a/Rif1/Trp53bp1/Atr/Egfr/Spidr	12	GO_BP	down
GO:0071805	potassium ion transmembrane transport	12/871	212/28891	0.0278137	0.0876142	0.0568151	Nedd4/Ank3/Flna/Cd63/Slc9a9/Large1/Kcnma1/Kcnk2/Pkd2/Grip1/Grp/Slc24a3	12	GO_BP	down
GO:0014020	primary neural tube formation	8/871	119/28891	0.0278156	0.0876142	0.0568151	Luzp1/Hif1a/Kdm2a/Prkacb/Ski/Adm/Sfrp1/Fzd2	8	GO_BP	down
GO:1904659	glucose transmembrane transport	8/871	119/28891	0.0278156	0.0876142	0.0568151	Braf/Mapk14/Oga/Stxbp4/Prkca/Gpc3/C3/Grb10	8	GO_BP	down
GO:0010596	negative regulation of endothelial cell migration	5/871	57/28891	0.0284008	0.08935	0.0579407	Svbp/Krit1/Sp100/Apoe/Serpinf1	5	GO_BP	down
GO:0050435	amyloid-beta metabolic process	5/871	57/28891	0.0284008	0.08935	0.0579407	Dyrk1a/Abcg1/Ifngr1/Apoe/Slc2a13	5	GO_BP	down
GO:0019319	hexose biosynthetic process	7/871	98/28891	0.0288074	0.0905748	0.0587349	Hif1a/Nr3c1/Supt20/Ppp4r3a/Tpi1/Ep300/Ddb1	7	GO_BP	down
GO:0008645	hexose transmembrane transport	8/871	120/28891	0.029047	0.0912184	0.0591524	Braf/Mapk14/Oga/Stxbp4/Prkca/Gpc3/C3/Grb10	8	GO_BP	down
GO:0055006	cardiac cell development	8/871	120/28891	0.029047	0.0912184	0.0591524	Nr3c1/Ep300/Tgfbr3/Plec/Large1/Myh11/Adra1a/Slc8a1	8	GO_BP	down
GO:0016197	endosomal transport	13/871	238/28891	0.0291758	0.0914539	0.0593051	Tmcc1/Vti1a/Gbf1/Pikfyve/Washc2/Vps13b/Washc4/Tbc1d5/Dennd1a/Bcl2l1/Snx30/Abca1/Grip1	13	GO_BP	down
GO:0009303	rRNA transcription	4/871	39/28891	0.0292792	0.0914539	0.0593051	Cavin1/Macroh2a2/Ang/Ippk	4	GO_BP	down
GO:0045940	positive regulation of steroid metabolic process	4/871	39/28891	0.0292792	0.0914539	0.0593051	Abcg1/Scap/Igf1r/Apoe	4	GO_BP	down
GO:0055090	acylglycerol homeostasis	4/871	39/28891	0.0292792	0.0914539	0.0593051	Pnpla8/Rora/Apoe/Lpl	4	GO_BP	down
GO:0060674	placenta blood vessel development	4/871	39/28891	0.0292792	0.0914539	0.0593051	Notch2/Ccn1/Pkd1/Pkd2	4	GO_BP	down
GO:0070328	triglyceride homeostasis	4/871	39/28891	0.0292792	0.0914539	0.0593051	Pnpla8/Rora/Apoe/Lpl	4	GO_BP	down
GO:1900225	regulation of NLRP3 inflammasome complex assembly	4/871	39/28891	0.0292792	0.0914539	0.0593051	Stmp1/Ptpn22/Trim30a/Prkd1	4	GO_BP	down
GO:1900274	regulation of phospholipase C activity	4/871	39/28891	0.0292792	0.0914539	0.0593051	Gnaq/Lpar1/Ang/Adra1a	4	GO_BP	down
GO:1902003	regulation of amyloid-beta formation	4/871	39/28891	0.0292792	0.0914539	0.0593051	Abcg1/Ifngr1/Apoe/Slc2a13	4	GO_BP	down
GO:0045137	development of primary sexual characteristics	14/871	263/28891	0.0293257	0.0915445	0.0593638	Fndc3a/Flna/Stat5b/Bcl2l1/Atm/Pde4d/Insl6/Stat5a/Ar/Sfrp1/Sema3a/Angpt1/Schip1/Zfpm2	14	GO_BP	down
GO:0043488	regulation of mRNA stability	10/871	166/28891	0.0293936	0.0916471	0.0594303	Pabpc1/Tnrc6b/Pan3/Qki/Zc3h14/Traf5/Cpeb3/Zfp36l2/Zfp36l1/Vim	10	GO_BP	down
GO:1901136	carbohydrate derivative catabolic process	10/871	166/28891	0.0293936	0.0916471	0.0594303	Man1a2/Hint1/Dpyd/Edem1/Renbp/Gns/Cd44/Samhd1/Xdh/Man1a	10	GO_BP	down
GO:0006417	regulation of translation	20/871	418/28891	0.0296576	0.0924153	0.0599285	Pabpc1/Tnrc6b/Rbms3/Ddx6/Pan3/Qki/Upf3b/Impact/Dnajc1/Ep300/Shfl/Cpeb3/Cpeb1/Ajuba/Prkca/Ang/Zfp36l2/Zfp36l1/Cyp1b1/Vim	20	GO_BP	down
GO:0043367	CD4-positive, alpha-beta T cell differentiation	7/871	99/28891	0.030225	0.0937642	0.0608032	Ncor1/Stat3/Braf/Tox/Gadd45g/Ccl19/Rora	7	GO_BP	down
GO:0002209	behavioral defense response	5/871	58/28891	0.0303363	0.0937642	0.0608032	Ep300/Large1/Apoe/Grp/Lypd1	5	GO_BP	down
GO:0021587	cerebellum morphogenesis	5/871	58/28891	0.0303363	0.0937642	0.0608032	Atxn2/Herc1/Rora/Ophn1/Gli2	5	GO_BP	down
GO:0034142	toll-like receptor 4 signaling pathway	5/871	58/28891	0.0303363	0.0937642	0.0608032	Znrf1/Ptpn22/Pik3r1/Prkce/Mfhas1	5	GO_BP	down
GO:0043388	positive regulation of DNA binding	5/871	58/28891	0.0303363	0.0937642	0.0608032	Brd4/Ep300/Prkn/Hipk2/Ski	5	GO_BP	down
GO:0045058	T cell selection	5/871	58/28891	0.0303363	0.0937642	0.0608032	Stat3/Braf/Tox/Gli3/Aire	5	GO_BP	down
GO:0045687	positive regulation of glial cell differentiation	5/871	58/28891	0.0303363	0.0937642	0.0608032	Qki/Il6st/Ptpra/Ptprz1/Ptn	5	GO_BP	down
GO:0051898	negative regulation of phosphatidylinositol 3-kinase/protein kinase B signal transduction	5/871	58/28891	0.0303363	0.0937642	0.0608032	Ncor1/Ptprj/Igf1r/Xdh/Magi2	5	GO_BP	down
GO:0061900	glial cell activation	5/871	58/28891	0.0303363	0.0937642	0.0608032	Atm/Egfr/Grn/Ifngr1/Ldlr	5	GO_BP	down
GO:0070169	positive regulation of biomineral tissue development	5/871	58/28891	0.0303363	0.0937642	0.0608032	Bmpr2/Ccn1/Pkdcc/Ptn/Slc8a1	5	GO_BP	down
GO:0070229	negative regulation of lymphocyte apoptotic process	5/871	58/28891	0.0303363	0.0937642	0.0608032	Hif1a/Kifap3/Cd44/Serpinb9/Prkcq	5	GO_BP	down
GO:1903170	negative regulation of calcium ion transmembrane transport	5/871	58/28891	0.0303363	0.0937642	0.0608032	Ubr3/Fbxo11/Prkce/Gem/Pkd2	5	GO_BP	down
GO:0043279	response to alkaloid	6/871	78/28891	0.0303413	0.0937642	0.0608032	Crebbp/Prkce/Bcl2l1/Spidr/Sdk1/Slc8a1	6	GO_BP	down
GO:0072171	mesonephric tubule morphogenesis	6/871	78/28891	0.0303413	0.0937642	0.0608032	Npnt/Greb1l/Gli3/Cd44/Hs3st3a1/Gpc3	6	GO_BP	down
GO:0097530	granulocyte migration	10/871	167/28891	0.0304572	0.094067	0.0609995	Gbf1/Pikfyve/Ptprj/Prkca/Mospd2/Pde4d/Ccl19/Mcu/Cd99l2/Itga1	10	GO_BP	down
GO:0051053	negative regulation of DNA metabolic process	9/871	144/28891	0.0307382	0.094834	0.0614969	Bmpr2/Pds5a/Rif1/Trp53bp1/Atm/Atr/Rad50/Nbn/Kcnk2	9	GO_BP	down
GO:0006144	purine nucleobase metabolic process	3/871	23/28891	0.0308686	0.094834	0.0614969	Adk/Dpyd/Xdh	3	GO_BP	down
GO:0021535	cell migration in hindbrain	3/871	23/28891	0.0308686	0.094834	0.0614969	Rere/Flna/Plxna2	3	GO_BP	down
GO:0038128	ERBB2 signaling pathway	3/871	23/28891	0.0308686	0.094834	0.0614969	Cpne3/Sos1/Egfr	3	GO_BP	down
GO:0048670	regulation of collateral sprouting	3/871	23/28891	0.0308686	0.094834	0.0614969	Fgf13/Efna5/Epha7	3	GO_BP	down
GO:0051220	cytoplasmic sequestering of protein	3/871	23/28891	0.0308686	0.094834	0.0614969	Flna/Pkd1/Pkd2	3	GO_BP	down
GO:1900227	positive regulation of NLRP3 inflammasome complex assembly	3/871	23/28891	0.0308686	0.094834	0.0614969	Stmp1/Ptpn22/Prkd1	3	GO_BP	down
GO:1900746	regulation of vascular endothelial growth factor signaling pathway	3/871	23/28891	0.0308686	0.094834	0.0614969	Cd63/Xdh/Robo1	3	GO_BP	down
GO:1903672	positive regulation of sprouting angiogenesis	3/871	23/28891	0.0308686	0.094834	0.0614969	Hif1a/Smad1/Fut1	3	GO_BP	down
GO:0032886	regulation of microtubule-based process	14/871	265/28891	0.0309839	0.0951322	0.0616903	Mid1/Eml4/Memo1/Dyrk1a/Cdk5rap2/Pde4dip/Patj/Fgf13/Pkd1/Togaram1/Efna5/Trim37/Phldb2/Gnai1	14	GO_BP	down
GO:0016051	carbohydrate biosynthetic process	12/871	216/28891	0.0314827	0.0966073	0.0626469	Hif1a/Nr3c1/Chst11/Ext1/Supt20/Ppp4r3a/Tpi1/Ep300/Ddb1/Fut1/Csgalnact1/Grb10	12	GO_BP	down
GO:0018210	peptidyl-threonine modification	8/871	122/28891	0.0316214	0.0968421	0.0627991	Dyrk1a/Hipk2/Prkca/Map3k10/Prkag2/Stox1/Akt3/Prkd1	8	GO_BP	down
GO:0042472	inner ear morphogenesis	8/871	122/28891	0.0316214	0.0968421	0.0627991	Bcr/Ttc39c/Wdpcp/Stox1/Pcdh15/Zeb1/Fzd2/Gli2	8	GO_BP	down
GO:0090630	activation of GTPase activity	7/871	100/28891	0.0316886	0.0968421	0.0627991	Bcr/Ralgapb/Ralgapa2/Tiam1/Tbc1d5/Tbc1d2b/Tbc1d12	7	GO_BP	down
GO:0021680	cerebellar Purkinje cell layer development	4/871	40/28891	0.0317812	0.0968421	0.0627991	Atxn2/Rere/Herc1/Rora	4	GO_BP	down
GO:0030513	positive regulation of BMP signaling pathway	4/871	40/28891	0.0317812	0.0968421	0.0627991	Notch2/Tgfbr3/Ccn1/Gpc3	4	GO_BP	down
GO:0035850	epithelial cell differentiation involved in kidney development	4/871	40/28891	0.0317812	0.0968421	0.0627991	Ext1/Notch2/Myo1e/Basp1	4	GO_BP	down
GO:0043267	negative regulation of potassium ion transport	4/871	40/28891	0.0317812	0.0968421	0.0627991	Gnaq/Ank3/Plcb4/Grp	4	GO_BP	down
GO:0046686	response to cadmium ion	4/871	40/28891	0.0317812	0.0968421	0.0627991	Mt1/Egfr/Mt2/Camk2b	4	GO_BP	down
GO:0048665	neuron fate specification	4/871	40/28891	0.0317812	0.0968421	0.0627991	Gli3/Ascl1/Gli2/Dmrt3	4	GO_BP	down
GO:0086065	cell communication involved in cardiac conduction	4/871	40/28891	0.0317812	0.0968421	0.0627991	Flna/Pde4d/Dsg2/Slc8a1	4	GO_BP	down
GO:0090162	establishment of epithelial cell polarity	4/871	40/28891	0.0317812	0.0968421	0.0627991	Frmd4b/Myo18a/Pkd1/Ophn1	4	GO_BP	down
GO:1905314	semi-lunar valve development	4/871	40/28891	0.0317812	0.0968421	0.0627991	Notch2/Bmpr2/Robo1/Robo2	4	GO_BP	down
GO:0048705	skeletal system morphogenesis	14/871	266/28891	0.0318381	0.0969589	0.0628749	Chst11/Ext1/Mapk14/Wwox/Gli3/Ski/Zfp950/Flvcr1/Pkd1/Sfrp1/Hhip/Csgalnact1/Zeb1/Schip1	14	GO_BP	down
GO:0071695	anatomical structure maturation	16/871	317/28891	0.0319644	0.097287	0.0630876	Gnaq/Ank3/Hif1a/Ext1/Rere/Ankrd17/Fem1b/Flvcr1/Ccl19/Kcnma1/Ascl1/Xylt1/Pmp22/Myo5a/Zbtb16/C3	16	GO_BP	down
GO:0007492	endoderm development	6/871	79/28891	0.0320303	0.097431	0.063181	Rtf1/Ext1/Ankrd17/Bptf/Zfp36l1/Angpt1	6	GO_BP	down
GO:0021515	cell differentiation in spinal cord	5/871	59/28891	0.0323526	0.0981263	0.0636319	Dync2h1/Gli3/Ascl1/Gli2/Dmrt3	5	GO_BP	down
GO:0030042	actin filament depolymerization	5/871	59/28891	0.0323526	0.0981263	0.0636319	Mical3/Flii/Shroom2/Lmod1/Swap70	5	GO_BP	down
GO:0030514	negative regulation of BMP signaling pathway	5/871	59/28891	0.0323526	0.0981263	0.0636319	Crim1/Hipk2/Ski/Sfrp1/Fbn1	5	GO_BP	down
GO:0035567	non-canonical Wnt signaling pathway	5/871	59/28891	0.0323526	0.0981263	0.0636319	Tiam1/Rnf213/Sfrp1/Gpc3/Fzd2	5	GO_BP	down
GO:0061001	regulation of dendritic spine morphogenesis	5/871	59/28891	0.0323526	0.0981263	0.0636319	Tiam1/Mfn1/Camk2b/Nlgn1/Pak3	5	GO_BP	down
GO:0097191	extrinsic apoptotic signaling pathway	13/871	242/28891	0.0327426	0.0992516	0.0643616	Eya4/Stk3/Pik3r1/Sp100/Trps1/Fem1b/Bcl2l1/Itga6/Wwox/Gstp1/Ar/Sfrp1/Sgk3	13	GO_BP	down
GO:0006275	regulation of DNA replication	8/871	123/28891	0.0329653	0.0996381	0.0646123	Rbbp6/Ankrd17/Pds5a/Atr/Egfr/Ccdc88a/Polg2/Gli2	8	GO_BP	down
GO:0007498	mesoderm development	8/871	123/28891	0.0329653	0.0996381	0.0646123	Smad1/Exoc4/Ext1/Bmpr2/Trp63/Tead1/Nf2/Zfp36l1	8	GO_BP	down
GO:0015749	monosaccharide transmembrane transport	8/871	123/28891	0.0329653	0.0996381	0.0646123	Braf/Mapk14/Oga/Stxbp4/Prkca/Gpc3/C3/Grb10	8	GO_BP	down
GO:0048709	oligodendrocyte differentiation	8/871	123/28891	0.0329653	0.0996381	0.0646123	Qki/Exoc4/Ptprj/Gli3/Ptpra/Ascl1/Ptprz1/Ptn	8	GO_BP	down
GO:0051101	regulation of DNA binding	8/871	123/28891	0.0329653	0.0996381	0.0646123	Brd4/Cpne1/Ep300/Prkn/Hipk2/Sp100/Ski/Wfikkn2	8	GO_BP	down
GO:0035914	skeletal muscle cell differentiation	7/871	101/28891	0.033199	0.100287	0.0650329	Ddx17/Bcl9l/Hdac4/Large1/Rbfox1/Hivep3/Hdac9	7	GO_BP	down
GO:0034249	negative regulation of amide metabolic process	13/871	243/28891	0.0336813	0.101685	0.0659396	Pabpc1/Tnrc6b/Ddx6/Pan3/Shfl/Cpeb3/Cpeb1/Ajuba/Prkca/Ang/Zfp36l2/Apoe/Zfp36l1	13	GO_BP	down
GO:0010611	regulation of cardiac muscle hypertrophy	6/871	80/28891	0.0337794	0.101805	0.0660173	Nr3c1/Jarid2/Adk/Ep300/Prkca/Adra1a	6	GO_BP	down
GO:0051057	positive regulation of small GTPase mediated signal transduction	6/871	80/28891	0.0337794	0.101805	0.0660173	Auts2/Notch2/Bnip2/Lpar1/Sos1/Robo1	6	GO_BP	down
GO:2000514	regulation of CD4-positive, alpha-beta T cell activation	6/871	80/28891	0.0337794	0.101805	0.0660173	Lgals9/Itch/Cd44/Ccl19/Prkcq/Cblb	6	GO_BP	down
GO:0043161	proteasome-mediated ubiquitin-dependent protein catabolic process	21/871	451/28891	0.0338851	0.102065	0.0661858	Pcbp2/Znrf1/Ubr3/Man1a2/Fbxl17/N4bp1/Btrc/Prkn/Trim25/Itch/Ddb1/Birc2/Fem1b/Anapc1/Edem1/Spopl/Pmp22/Sh3rf3/Man1a/Rnf180/Cbfa2t3	21	GO_BP	down
GO:0003230	cardiac atrium development	4/871	41/28891	0.0344048	0.102155	0.0662442	Notch2/Bmpr2/Sos1/Ccn1	4	GO_BP	down
GO:0010591	regulation of lamellipodium assembly	4/871	41/28891	0.0344048	0.102155	0.0662442	Auts2/Pik3r1/Hdac4/Plce1	4	GO_BP	down
GO:0032743	positive regulation of interleukin-2 production	4/871	41/28891	0.0344048	0.102155	0.0662442	Stat5b/Pde4d/Stat5a/Prkcq	4	GO_BP	down
GO:0061436	establishment of skin barrier	4/871	41/28891	0.0344048	0.102155	0.0662442	Ncor1/Ncor2/Trp63/Plec	4	GO_BP	down
GO:0141085	regulation of inflammasome-mediated signaling pathway	4/871	41/28891	0.0344048	0.102155	0.0662442	Stmp1/Ptpn22/Trim30a/Prkd1	4	GO_BP	down
GO:0006893	Golgi to plasma membrane transport	5/871	60/28891	0.0344507	0.102155	0.0662442	Ank3/Exoc4/Exoc6b/Rab34/Pkdcc	5	GO_BP	down
GO:0007595	lactation	5/871	60/28891	0.0344507	0.102155	0.0662442	Hif1a/Med1/Stat5b/Stat5a/Xdh	5	GO_BP	down
GO:0072666	establishment of protein localization to vacuole	5/871	60/28891	0.0344507	0.102155	0.0662442	Nedd4/Ap3b1/Snx16/Vps13a/Vps41	5	GO_BP	down
GO:0086001	cardiac muscle cell action potential	5/871	60/28891	0.0344507	0.102155	0.0662442	Ank3/Slmap/Flna/Fgf13/Dsg2	5	GO_BP	down
GO:0001956	positive regulation of neurotransmitter secretion	3/871	24/28891	0.0345086	0.102155	0.0662442	Bcl2l1/Nlgn1/Syt1	3	GO_BP	down
GO:0003283	atrial septum development	3/871	24/28891	0.0345086	0.102155	0.0662442	Notch2/Bmpr2/Ccn1	3	GO_BP	down
GO:0043369	CD4-positive or CD8-positive, alpha-beta T cell lineage commitment	3/871	24/28891	0.0345086	0.102155	0.0662442	Stat3/Braf/Tox	3	GO_BP	down
GO:0043586	tongue development	3/871	24/28891	0.0345086	0.102155	0.0662442	Gli3/Wdpcp/Bnc2	3	GO_BP	down
GO:0048015	phosphatidylinositol-mediated signaling	3/871	24/28891	0.0345086	0.102155	0.0662442	Plcb4/Pi4ka/Plce1	3	GO_BP	down
GO:0048485	sympathetic nervous system development	3/871	24/28891	0.0345086	0.102155	0.0662442	Trp63/Ascl1/Sema3a	3	GO_BP	down
GO:0090330	regulation of platelet aggregation	3/871	24/28891	0.0345086	0.102155	0.0662442	Pdpn/Prkca/Prkcq	3	GO_BP	down
GO:0097398	cellular response to interleukin-17	3/871	24/28891	0.0345086	0.102155	0.0662442	Usp25/Stat3/Traf5	3	GO_BP	down
GO:0141087	positive regulation of inflammasome-mediated signaling pathway	3/871	24/28891	0.0345086	0.102155	0.0662442	Stmp1/Ptpn22/Prkd1	3	GO_BP	down
GO:2000773	negative regulation of cellular senescence	3/871	24/28891	0.0345086	0.102155	0.0662442	Trp63/Map3k3/Akt3	3	GO_BP	down
GO:2001169	regulation of ATP biosynthetic process	3/871	24/28891	0.0345086	0.102155	0.0662442	Stat3/Prkn/Bcl2l1	3	GO_BP	down
GO:0050779	RNA destabilization	7/871	102/28891	0.0347566	0.102155	0.0662442	Pabpc1/Tnrc6b/Pan3/Cpeb3/Ang/Zfp36l2/Zfp36l1	7	GO_BP	down
GO:0002315	marginal zone B cell differentiation	2/871	10/28891	0.0347931	0.102155	0.0662442	Notch2/Dock10	2	GO_BP	down
GO:0003129	heart induction	2/871	10/28891	0.0347931	0.102155	0.0662442	Robo1/Robo2	2	GO_BP	down
GO:0007158	neuron cell-cell adhesion	2/871	10/28891	0.0347931	0.102155	0.0662442	Astn2/Nlgn1	2	GO_BP	down
GO:0015820	leucine transport	2/871	10/28891	0.0347931	0.102155	0.0662442	Slc7a6/Slc7a7	2	GO_BP	down
GO:0032836	glomerular basement membrane development	2/871	10/28891	0.0347931	0.102155	0.0662442	Ext1/Myo1e	2	GO_BP	down
GO:0034372	very-low-density lipoprotein particle remodeling	2/871	10/28891	0.0347931	0.102155	0.0662442	Apoe/Lpl	2	GO_BP	down
GO:0035646	endosome to melanosome transport	2/871	10/28891	0.0347931	0.102155	0.0662442	Ap1g1/Cd63	2	GO_BP	down
GO:0035878	nail development	2/871	10/28891	0.0347931	0.102155	0.0662442	Itgb4/Itga6	2	GO_BP	down
GO:0043485	endosome to pigment granule transport	2/871	10/28891	0.0347931	0.102155	0.0662442	Ap1g1/Cd63	2	GO_BP	down
GO:0048671	negative regulation of collateral sprouting	2/871	10/28891	0.0347931	0.102155	0.0662442	Fgf13/Epha7	2	GO_BP	down
GO:0048757	pigment granule maturation	2/871	10/28891	0.0347931	0.102155	0.0662442	Ap1g1/Cd63	2	GO_BP	down
GO:0060710	chorio-allantoic fusion	2/871	10/28891	0.0347931	0.102155	0.0662442	Ccn1/Zfp36l1	2	GO_BP	down
GO:0061525	hindgut development	2/871	10/28891	0.0347931	0.102155	0.0662442	Gli3/Gli2	2	GO_BP	down
GO:0070099	regulation of chemokine-mediated signaling pathway	2/871	10/28891	0.0347931	0.102155	0.0662442	Hif1a/Robo1	2	GO_BP	down
GO:0071352	cellular response to interleukin-2	2/871	10/28891	0.0347931	0.102155	0.0662442	Stat3/Stat5a	2	GO_BP	down
GO:0071481	cellular response to X-ray	2/871	10/28891	0.0347931	0.102155	0.0662442	Atm/Sfrp1	2	GO_BP	down
GO:0071670	smooth muscle cell chemotaxis	2/871	10/28891	0.0347931	0.102155	0.0662442	Lpar1/Gstp1	2	GO_BP	down
GO:0086064	cell communication by electrical coupling involved in cardiac conduction	2/871	10/28891	0.0347931	0.102155	0.0662442	Pde4d/Slc8a1	2	GO_BP	down
GO:0097104	postsynaptic membrane assembly	2/871	10/28891	0.0347931	0.102155	0.0662442	Nlgn1/Magi2	2	GO_BP	down
GO:0140250	regulation protein catabolic process at synapse	2/871	10/28891	0.0347931	0.102155	0.0662442	Nedd4/Prkn	2	GO_BP	down
GO:0150172	regulation of phosphatidylcholine metabolic process	2/871	10/28891	0.0347931	0.102155	0.0662442	Capn2/Ldlr	2	GO_BP	down
GO:1902065	response to L-glutamate	2/871	10/28891	0.0347931	0.102155	0.0662442	Prkn/Igf1r	2	GO_BP	down
GO:1903265	positive regulation of tumor necrosis factor-mediated signaling pathway	2/871	10/28891	0.0347931	0.102155	0.0662442	Cpne1/Prkn	2	GO_BP	down
GO:2000646	positive regulation of receptor catabolic process	2/871	10/28891	0.0347931	0.102155	0.0662442	Itch/Apoe	2	GO_BP	down
GO:0061136	regulation of proteasomal protein catabolic process	11/871	195/28891	0.034932	0.102505	0.0664714	Usp25/N4bp1/Btrc/Prkn/Pkd1/Ophn1/Apoe/Sh3rf3/Ecscr/Rnf180/Cbfa2t3	11	GO_BP	down
GO:0090150	establishment of protein localization to membrane	14/871	270/28891	0.0354267	0.103899	0.067375	Ank3/Ap3b1/Exoc4/Braf/Oga/Pikfyve/Rab34/Large1/Arl6/Agk/Tcaf2/Pkdcc/Grip1/Colq	14	GO_BP	down
GO:0017148	negative regulation of translation	12/871	220/28891	0.0354869	0.104017	0.0674517	Pabpc1/Tnrc6b/Ddx6/Pan3/Shfl/Cpeb3/Cpeb1/Ajuba/Prkca/Ang/Zfp36l2/Zfp36l1	12	GO_BP	down
GO:0045786	negative regulation of cell cycle	19/871	400/28891	0.0355389	0.104111	0.0675127	Mapk14/Brd4/Cdk5rap2/Prkacb/Trp53bp1/Fem1b/Atm/Atr/Egfr/Ptprk/Rad50/Nbn/Stk33/Pkd2/Trim37/Zfp36l2/Zfp36l1/Brinp2/Myo16	19	GO_BP	down
GO:0051924	regulation of calcium ion transport	15/871	296/28891	0.035885	0.105066	0.068132	Ubr3/Fbxo11/Oga/Ahnak/Ptpn22/Prkce/Pde4d/Fgf14/Gem/Tspo/Pkd2/Tspan18/Myo5a/Prkd1/Slc8a1	15	GO_BP	down
GO:0010565	regulation of cellular ketone metabolic process	10/871	172/28891	0.0361845	0.105884	0.0686623	Ncor1/Dcaf5/Ncor2/Fmo1/Prkce/Scap/Pdk3/Prkag2/Kcnma1/Slc7a7	10	GO_BP	down
GO:1901988	negative regulation of cell cycle phase transition	14/871	271/28891	0.0363676	0.10636	0.0689712	Mapk14/Brd4/Cdk5rap2/Trp53bp1/Fem1b/Atm/Atr/Rad50/Nbn/Stk33/Pkd2/Zfp36l2/Zfp36l1/Myo16	14	GO_BP	down
GO:0019730	antimicrobial humoral response	12/871	221/28891	0.0365419	0.106713	0.0692002	H2-D1/H2-K1/H2-T22/B2m/H2-Q4/Ccl19/H2-Q7/Adm/Ang/H2-Q6/H2-Q2/H2-M2	12	GO_BP	down
GO:0001974	blood vessel remodeling	5/871	61/28891	0.0366311	0.106713	0.0692002	Ext1/Bcr/Bmpr2/Flna/Tgfbr3	5	GO_BP	down
GO:0006903	vesicle targeting	5/871	61/28891	0.0366311	0.106713	0.0692002	Exoc4/Gbf1/Exoc6b/Pclo/Nlgn1	5	GO_BP	down
GO:0043407	negative regulation of MAP kinase activity	5/871	61/28891	0.0366311	0.106713	0.0692002	Ptpn22/Ptprj/Gstp1/Sfrp1/Apoe	5	GO_BP	down
GO:0050881	musculoskeletal movement	5/871	61/28891	0.0366311	0.106713	0.0692002	Vti1a/Gaa/Hipk2/Ascl1/Prkd1	5	GO_BP	down
GO:0097479	synaptic vesicle localization	5/871	61/28891	0.0366311	0.106713	0.0692002	Ap3b1/Bcl2l1/Pclo/Nlgn1/Magi2	5	GO_BP	down
GO:0099171	presynaptic modulation of chemical synaptic transmission	5/871	61/28891	0.0366311	0.106713	0.0692002	Ywhah/Prkce/Prkca/Apba1/Adra1a	5	GO_BP	down
GO:0035640	exploration behavior	4/871	42/28891	0.0371504	0.107986	0.0700255	Prkce/Grn/Apoe/Itga3	4	GO_BP	down
GO:0044546	NLRP3 inflammasome complex assembly	4/871	42/28891	0.0371504	0.107986	0.0700255	Stmp1/Ptpn22/Trim30a/Prkd1	4	GO_BP	down
GO:0071827	plasma lipoprotein particle organization	4/871	42/28891	0.0371504	0.107986	0.0700255	Abcg1/Abca1/Apoe/Lpl	4	GO_BP	down
GO:0110110	positive regulation of animal organ morphogenesis	4/871	42/28891	0.0371504	0.107986	0.0700255	Ar/Stox1/Robo1/Robo2	4	GO_BP	down
GO:0008154	actin polymerization or depolymerization	11/871	197/28891	0.0371855	0.108028	0.0700527	Mical3/Cyrib/Tmsb10/Prkce/Flii/Diaph2/Shroom2/Lmod1/Swap70/Pak3/Alox15	11	GO_BP	down
GO:0006906	vesicle fusion	8/871	126/28891	0.0372286	0.108093	0.070095	Stx8/Vti1a/Pikfyve/Rab34/Vps41/Samd9l/Stxbp6/Syt1	8	GO_BP	down
GO:0030856	regulation of epithelial cell differentiation	10/871	173/28891	0.0374138	0.108284	0.0702187	S1pr3/Med1/Trp63/Stat5b/Macroh2a2/Stat5a/Ascl1/Xdh/Zfp36l1/Zeb1	10	GO_BP	down
GO:0006493	protein O-linked glycosylation	6/871	82/28891	0.0374598	0.108284	0.0702187	Galnt17/Large1/Vegfb/Tmtc2/Trak2/Gxylt2	6	GO_BP	down
GO:0046626	regulation of insulin receptor signaling pathway	6/871	82/28891	0.0374598	0.108284	0.0702187	Gkap1/Ptprj/Prkca/Sik2/Prkcq/Grb10	6	GO_BP	down
GO:0051145	smooth muscle cell differentiation	6/871	82/28891	0.0374598	0.108284	0.0702187	Qki/Ankrd17/Npnt/Adm/Zeb1/C3	6	GO_BP	down
GO:0051279	regulation of release of sequestered calcium ion into cytosol	6/871	82/28891	0.0374598	0.108284	0.0702187	Prkce/Pde4d/Pkd2/Myo5a/Prkd1/Slc8a1	6	GO_BP	down
GO:0051851	modulation by host of symbiont process	6/871	82/28891	0.0374598	0.108284	0.0702187	Brd4/Ep300/Prkn/Pi4ka/Pou2f3/Apoe	6	GO_BP	down
GO:0051965	positive regulation of synapse assembly	6/871	82/28891	0.0374598	0.108284	0.0702187	Pik3r1/Prkca/Efna5/Adgrl2/Nlgn1/Lingo2	6	GO_BP	down
GO:2000242	negative regulation of reproductive process	6/871	82/28891	0.0374598	0.108284	0.0702187	Prkacb/Ddb1/Bcl2l1/Insl6/Serpinf1/Zfpm2	6	GO_BP	down
GO:0001938	positive regulation of endothelial cell proliferation	7/871	104/28891	0.0380153	0.109768	0.0711814	Stat3/Prkca/Vegfb/Stat5a/Ang/Akt3/Prkd1	7	GO_BP	down
GO:0070664	negative regulation of leukocyte proliferation	7/871	104/28891	0.0380153	0.109768	0.0711814	Lgals9/Itch/Atm/Cd44/Gstp1/Il20rb/Cblb	7	GO_BP	down
GO:0006359	regulation of transcription by RNA polymerase III	3/871	25/28891	0.0383601	0.110277	0.0715115	Setd5/Dek/Ar	3	GO_BP	down
GO:0021692	cerebellar Purkinje cell layer morphogenesis	3/871	25/28891	0.0383601	0.110277	0.0715115	Atxn2/Herc1/Rora	3	GO_BP	down
GO:0030325	adrenal gland development	3/871	25/28891	0.0383601	0.110277	0.0715115	Nr3c1/Ascl1/Igf1r	3	GO_BP	down
GO:0042438	melanin biosynthetic process	3/871	25/28891	0.0383601	0.110277	0.0715115	Rapgef2/Mfsd12/Myo5a	3	GO_BP	down
GO:0050860	negative regulation of T cell receptor signaling pathway	3/871	25/28891	0.0383601	0.110277	0.0715115	Ptpn22/Ptprj/Cblb	3	GO_BP	down
GO:0070242	thymocyte apoptotic process	3/871	25/28891	0.0383601	0.110277	0.0715115	Hif1a/Kifap3/Gli3	3	GO_BP	down
GO:1902547	regulation of cellular response to vascular endothelial growth factor stimulus	3/871	25/28891	0.0383601	0.110277	0.0715115	Cd63/Xdh/Robo1	3	GO_BP	down
GO:1903306	negative regulation of regulated secretory pathway	3/871	25/28891	0.0383601	0.110277	0.0715115	Braf/Bcr/Lgals9	3	GO_BP	down
GO:0007269	neurotransmitter secretion	10/871	174/28891	0.0386717	0.111051	0.0720133	Slc38a2/Braf/Prkn/Bcl2l1/Pclo/Prkca/Stxbp5/Mctp2/Nlgn1/Syt1	10	GO_BP	down
GO:0099643	signal release from synapse	10/871	174/28891	0.0386717	0.111051	0.0720133	Slc38a2/Braf/Prkn/Bcl2l1/Pclo/Prkca/Stxbp5/Mctp2/Nlgn1/Syt1	10	GO_BP	down
GO:0000077	DNA damage checkpoint signaling	8/871	127/28891	0.0387282	0.111092	0.0720395	Mapk14/Brd4/Trp53bp1/Fem1b/Atm/Atr/Nbn/Stk33	8	GO_BP	down
GO:0022037	metencephalon development	8/871	127/28891	0.0387282	0.111092	0.0720395	Atxn2/Rere/Herc1/Ascl1/Igf1r/Rora/Ophn1/Gli2	8	GO_BP	down
GO:0016573	histone acetylation	5/871	62/28891	0.0388944	0.111324	0.0721903	Auts2/Dek/Crebbp/Kat6a/Ep300	5	GO_BP	down
GO:0021575	hindbrain morphogenesis	5/871	62/28891	0.0388944	0.111324	0.0721903	Atxn2/Herc1/Rora/Ophn1/Gli2	5	GO_BP	down
GO:0050879	multicellular organismal movement	5/871	62/28891	0.0388944	0.111324	0.0721903	Vti1a/Gaa/Hipk2/Ascl1/Prkd1	5	GO_BP	down
GO:0072577	endothelial cell apoptotic process	5/871	62/28891	0.0388944	0.111324	0.0721903	Braf/Bmpr2/Krit1/Ecscr/Angpt1	5	GO_BP	down
GO:0007422	peripheral nervous system development	6/871	83/28891	0.0393922	0.112565	0.0729947	Plec/Itgb4/Sos1/Ski/Ascl1/Pmp22	6	GO_BP	down
GO:0014743	regulation of muscle hypertrophy	6/871	83/28891	0.0393922	0.112565	0.0729947	Nr3c1/Jarid2/Adk/Ep300/Prkca/Adra1a	6	GO_BP	down
GO:0033209	tumor necrosis factor-mediated signaling pathway	6/871	83/28891	0.0393922	0.112565	0.0729947	Txndc17/Ext1/Cpne1/Prkn/Traf5/Tjp2	6	GO_BP	down
GO:0016579	protein deubiquitination	7/871	105/28891	0.0397172	0.11337	0.0735167	Usp25/Otud7b/Tank/Usp34/Usp24/Itch/Mindy4	7	GO_BP	down
GO:0072080	nephron tubule development	7/871	105/28891	0.0397172	0.11337	0.0735167	Notch2/Npnt/Greb1l/Gli3/Cd44/Hs3st3a1/Gpc3	7	GO_BP	down
GO:0048839	inner ear development	12/871	224/28891	0.0398397	0.113657	0.0737031	H2-K1/Bcr/Ttc39c/Gli3/Kcnma1/Wdpcp/Plppr4/Stox1/Pcdh15/Zeb1/Fzd2/Gli2	12	GO_BP	down
GO:0031128	developmental induction	4/871	43/28891	0.0400184	0.113919	0.0738728	Hipk2/Ar/Robo1/Robo2	4	GO_BP	down
GO:0095500	acetylcholine receptor signaling pathway	4/871	43/28891	0.0400184	0.113919	0.0738728	Gnaq/Large1/Ly6h/Lypd1	4	GO_BP	down
GO:0097028	dendritic cell differentiation	4/871	43/28891	0.0400184	0.113919	0.0738728	Notch2/Ccl19/Trpm2/Camk4	4	GO_BP	down
GO:1903670	regulation of sprouting angiogenesis	4/871	43/28891	0.0400184	0.113919	0.0738728	Hif1a/Smad1/Tspan18/Fut1	4	GO_BP	down
GO:0001676	long-chain fatty acid metabolic process	8/871	128/28891	0.0402677	0.114504	0.0742522	Qki/Pnpla8/Aig1/Gstp1/Alox15/Myo5a/Pam/Cyp1b1	8	GO_BP	down
GO:0090174	organelle membrane fusion	8/871	128/28891	0.0402677	0.114504	0.0742522	Stx8/Vti1a/Pikfyve/Rab34/Vps41/Samd9l/Stxbp6/Syt1	8	GO_BP	down
GO:0046486	glycerolipid metabolic process	18/871	380/28891	0.0408364	0.116058	0.0752599	Capn2/Pnpla8/Pikfyve/Mtmr3/Pik3r1/Plpp1/Il6st/Synj2/Ajuba/Fig4/Pi4ka/Ang/Apoe/Plce1/Alox15/Ldlr/Lpl/C3	18	GO_BP	down
GO:0006303	double-strand break repair via nonhomologous end joining	5/871	63/28891	0.0412411	0.116584	0.0756011	Dek/Kdm2a/Rif1/Trp53bp1/Pola1	5	GO_BP	down
GO:0042596	fear response	5/871	63/28891	0.0412411	0.116584	0.0756011	Ext1/Large1/Apoe/Grp/Lypd1	5	GO_BP	down
GO:0006066	alcohol metabolic process	17/871	354/28891	0.0412538	0.116584	0.0756011	Plpp3/Dhrs7/Tpi1/Abcg1/Isyna1/Plpp1/Synj2/Scap/Abca1/Hmgcs1/Kcnma1/Apoe/Pmp22/Cyp7b1/Ippk/Ldlr/Cyp1b1	17	GO_BP	down
GO:0002377	immunoglobulin production	14/871	276/28891	0.0413424	0.116584	0.0756011	H2-D1/H2-K1/H2-T22/Rif1/Trp53bp1/Atm/H2-Q4/Nbn/Samhd1/H2-Q7/Swap70/H2-Q6/H2-Q2/H2-M2	14	GO_BP	down
GO:0002246	wound healing involved in inflammatory response	2/871	11/28891	0.0416896	0.116584	0.0756011	Hif1a/Cd44	2	GO_BP	down
GO:0002317	plasma cell differentiation	2/871	11/28891	0.0416896	0.116584	0.0756011	Lgals8/Lgals1	2	GO_BP	down
GO:0002645	positive regulation of tolerance induction	2/871	11/28891	0.0416896	0.116584	0.0756011	Itch/Cblb	2	GO_BP	down
GO:0006171	cAMP biosynthetic process	2/871	11/28891	0.0416896	0.116584	0.0756011	Adcy9/Adcy2	2	GO_BP	down
GO:0009415	response to water	2/871	11/28891	0.0416896	0.116584	0.0756011	Plec/Pkd2	2	GO_BP	down
GO:0010826	negative regulation of centrosome duplication	2/871	11/28891	0.0416896	0.116584	0.0756011	Cdk5rap2/Trim37	2	GO_BP	down
GO:0015803	branched-chain amino acid transport	2/871	11/28891	0.0416896	0.116584	0.0756011	Slc7a6/Slc7a7	2	GO_BP	down
GO:0021520	spinal cord motor neuron cell fate specification	2/871	11/28891	0.0416896	0.116584	0.0756011	Gli3/Gli2	2	GO_BP	down
GO:0032430	positive regulation of phospholipase A2 activity	2/871	11/28891	0.0416896	0.116584	0.0756011	Camk2b/Ang	2	GO_BP	down
GO:0033629	negative regulation of cell adhesion mediated by integrin	2/871	11/28891	0.0416896	0.116584	0.0756011	Swap70/Cyp1b1	2	GO_BP	down
GO:0034370	triglyceride-rich lipoprotein particle remodeling	2/871	11/28891	0.0416896	0.116584	0.0756011	Apoe/Lpl	2	GO_BP	down
GO:0034384	high-density lipoprotein particle clearance	2/871	11/28891	0.0416896	0.116584	0.0756011	Apoe/Ldlr	2	GO_BP	down
GO:0043320	natural killer cell degranulation	2/871	11/28891	0.0416896	0.116584	0.0756011	Lgals9/Ap1g1	2	GO_BP	down
GO:0045542	positive regulation of cholesterol biosynthetic process	2/871	11/28891	0.0416896	0.116584	0.0756011	Abcg1/Scap	2	GO_BP	down
GO:0046606	negative regulation of centrosome cycle	2/871	11/28891	0.0416896	0.116584	0.0756011	Cdk5rap2/Trim37	2	GO_BP	down
GO:0051561	positive regulation of mitochondrial calcium ion concentration	2/871	11/28891	0.0416896	0.116584	0.0756011	Bnip3/Mcu	2	GO_BP	down
GO:0060352	cell adhesion molecule production	2/871	11/28891	0.0416896	0.116584	0.0756011	Crebbp/Aqp4	2	GO_BP	down
GO:0060768	regulation of epithelial cell proliferation involved in prostate gland development	2/871	11/28891	0.0416896	0.116584	0.0756011	Ar/Serpinf1	2	GO_BP	down
GO:0061043	regulation of vascular wound healing	2/871	11/28891	0.0416896	0.116584	0.0756011	Hif1a/Vegfb	2	GO_BP	down
GO:0061299	retina vasculature morphogenesis in camera-type eye	2/871	11/28891	0.0416896	0.116584	0.0756011	Col4a1/Cyp1b1	2	GO_BP	down
GO:0070257	positive regulation of mucus secretion	2/871	11/28891	0.0416896	0.116584	0.0756011	Prkce/Egfr	2	GO_BP	down
GO:0071415	cellular response to purine-containing compound	2/871	11/28891	0.0416896	0.116584	0.0756011	Trpm2/Slc8a1	2	GO_BP	down
GO:0090085	regulation of protein deubiquitination	2/871	11/28891	0.0416896	0.116584	0.0756011	Tank/Itch	2	GO_BP	down
GO:0099545	trans-synaptic signaling by trans-synaptic complex	2/871	11/28891	0.0416896	0.116584	0.0756011	Cadm1/Nlgn1	2	GO_BP	down
GO:0106120	positive regulation of sterol biosynthetic process	2/871	11/28891	0.0416896	0.116584	0.0756011	Abcg1/Scap	2	GO_BP	down
GO:2000826	regulation of heart morphogenesis	2/871	11/28891	0.0416896	0.116584	0.0756011	Robo1/Robo2	2	GO_BP	down
GO:1901890	positive regulation of cell junction assembly	8/871	129/28891	0.0418474	0.1169	0.0758062	Iqgap1/Pik3r1/Ptprj/Prkca/Efna5/Adgrl2/Nlgn1/Lingo2	8	GO_BP	down
GO:1904035	regulation of epithelial cell apoptotic process	8/871	129/28891	0.0418474	0.1169	0.0758062	Braf/Krit1/Sav1/Adar/Igf1r/Zfp36l1/Ecscr/Angpt1	8	GO_BP	down
GO:0017157	regulation of exocytosis	12/871	226/28891	0.0421508	0.117685	0.0763151	Braf/Bcr/Lgals9/Ap1g1/Prkn/Bcl2l1/Pclo/Prkca/Stxbp5/Nlgn1/Myo5a/Syt1	12	GO_BP	down
GO:0003181	atrioventricular valve morphogenesis	3/871	26/28891	0.0424206	0.11781	0.0763962	Bmpr2/Ccn1/Zfpm2	3	GO_BP	down
GO:0006353	DNA-templated transcription termination	3/871	26/28891	0.0424206	0.11781	0.0763962	Cavin1/Scaf8/Setx	3	GO_BP	down
GO:0010763	positive regulation of fibroblast migration	3/871	26/28891	0.0424206	0.11781	0.0763962	Prkce/Pak3/Slc8a1	3	GO_BP	down
GO:0019068	virion assembly	3/871	26/28891	0.0424206	0.11781	0.0763962	Nedd4/Ddx6/Apoe	3	GO_BP	down
GO:0045822	negative regulation of heart contraction	3/871	26/28891	0.0424206	0.11781	0.0763962	Pik3r1/Pde4d/Adra1a	3	GO_BP	down
GO:0045838	positive regulation of membrane potential	3/871	26/28891	0.0424206	0.11781	0.0763962	Ank3/Prkn/Mfn1	3	GO_BP	down
GO:0046386	deoxyribose phosphate catabolic process	3/871	26/28891	0.0424206	0.11781	0.0763962	Dpyd/Samhd1/Xdh	3	GO_BP	down
GO:0046856	phosphatidylinositol dephosphorylation	3/871	26/28891	0.0424206	0.11781	0.0763962	Mtmr3/Synj2/Fig4	3	GO_BP	down
GO:0071880	adenylate cyclase-activating adrenergic receptor signaling pathway	3/871	26/28891	0.0424206	0.11781	0.0763962	Rapgef2/Adcy9/Adra1a	3	GO_BP	down
GO:1903975	regulation of glial cell migration	3/871	26/28891	0.0424206	0.11781	0.0763962	Tiam1/Ptprz1/Vim	3	GO_BP	down
GO:0016064	immunoglobulin mediated immune response	15/871	303/28891	0.0425593	0.118132	0.0766053	H2-D1/H2-K1/H2-T22/Rif1/Trp53bp1/Irf7/H2-Q4/Nbn/H2-Q7/Swap70/H2-Q6/H2-Q2/H2-M2/C3/Fcer2a	15	GO_BP	down
GO:0001782	B cell homeostasis	4/871	44/28891	0.0430088	0.118939	0.0771282	Hif1a/Sos1/Cd44/Dock10	4	GO_BP	down
GO:0010559	regulation of glycoprotein biosynthetic process	4/871	44/28891	0.0430088	0.118939	0.0771282	Oga/Ep300/Aatf/Ccl19	4	GO_BP	down
GO:0010765	positive regulation of sodium ion transport	4/871	44/28891	0.0430088	0.118939	0.0771282	Ank3/Fgf13/Fgf14/Akt3	4	GO_BP	down
GO:0032228	regulation of synaptic transmission, GABAergic	4/871	44/28891	0.0430088	0.118939	0.0771282	Prkce/Plcl2/Nlgn1/Adra1a	4	GO_BP	down
GO:0044331	cell-cell adhesion mediated by cadherin	4/871	44/28891	0.0430088	0.118939	0.0771282	Dennd6a/Cdh4/Cdh11/Adam19	4	GO_BP	down
GO:0046627	negative regulation of insulin receptor signaling pathway	4/871	44/28891	0.0430088	0.118939	0.0771282	Ptprj/Prkca/Prkcq/Grb10	4	GO_BP	down
GO:0051647	nucleus localization	4/871	44/28891	0.0430088	0.118939	0.0771282	Hook3/Nr3c1/Syne1/Clmn	4	GO_BP	down
GO:0060993	kidney morphogenesis	7/871	107/28891	0.0432685	0.119468	0.077471	Npnt/Greb1l/Gli3/Cd44/Fras1/Hs3st3a1/Gpc3	7	GO_BP	down
GO:0070167	regulation of biomineral tissue development	7/871	107/28891	0.0432685	0.119468	0.077471	Hif1a/Bmpr2/Ccn1/Srgn/Pkdcc/Ptn/Slc8a1	7	GO_BP	down
GO:0090288	negative regulation of cellular response to growth factor stimulus	7/871	107/28891	0.0432685	0.119468	0.077471	Nedd4/Crim1/Hipk2/Ski/Sfrp1/Xdh/Fbn1	7	GO_BP	down
GO:0070228	regulation of lymphocyte apoptotic process	6/871	85/28891	0.0434439	0.119889	0.0777442	Hif1a/Kifap3/Fnip1/Cd44/Serpinb9/Prkcq	6	GO_BP	down
GO:0000375	RNA splicing, via transesterification reactions	15/871	304/28891	0.0435801	0.120075	0.0778648	Snrpg/Rbm25/Qki/Ddx17/Rbm6/Dyrk1a/Cwf19l2/Mbnl1/Celf2/Srpk1/Prpf39/Prpf8/Fam172a/Setx/Rbfox1	15	GO_BP	down
GO:0000377	RNA splicing, via transesterification reactions with bulged adenosine as nucleophile	15/871	304/28891	0.0435801	0.120075	0.0778648	Snrpg/Rbm25/Qki/Ddx17/Rbm6/Dyrk1a/Cwf19l2/Mbnl1/Celf2/Srpk1/Prpf39/Prpf8/Fam172a/Setx/Rbfox1	15	GO_BP	down
GO:0000398	mRNA splicing, via spliceosome	15/871	304/28891	0.0435801	0.120075	0.0778648	Snrpg/Rbm25/Qki/Ddx17/Rbm6/Dyrk1a/Cwf19l2/Mbnl1/Celf2/Srpk1/Prpf39/Prpf8/Fam172a/Setx/Rbfox1	15	GO_BP	down
GO:0046622	positive regulation of organ growth	5/871	64/28891	0.0436716	0.120263	0.0779872	Nr3c1/Mapk14/Ep300/Tgfbr3/Zfpm2	5	GO_BP	down
GO:2001233	regulation of apoptotic signaling pathway	20/871	437/28891	0.043746	0.120405	0.0780789	Eya4/Hif1a/Trp63/Prkn/Stk3/Aatf/Sp100/Trps1/Fem1b/Bcl2l1/Itga6/Wwox/Cd44/Gstp1/Ar/Camk2b/Sfrp1/Pmp22/Sgk3/Rnf183	20	GO_BP	down
GO:0005976	polysaccharide metabolic process	7/871	108/28891	0.0451185	0.124052	0.0804439	Ext1/Phkb/Gaa/Il6st/Prkag2/Csgalnact1/Grb10	7	GO_BP	down
GO:2000243	positive regulation of reproductive process	7/871	108/28891	0.0451185	0.124052	0.0804439	Hdac4/Ar/Igf1r/Camk2b/Unc5c/Sema3a/Zfpm2	7	GO_BP	down
GO:0007599	hemostasis	10/871	179/28891	0.0453986	0.124757	0.080901	Gnaq/Ap3b1/Flna/Ptprj/Pdpn/Prkca/Prkcq/Pros1/Apoe/Tspan18	10	GO_BP	down
GO:0035304	regulation of protein dephosphorylation	6/871	86/28891	0.045564	0.124949	0.0810255	Ppp1r12a/Mgat5/Mfhas1/Swap70/Magi2/Itga1	6	GO_BP	down
GO:0045661	regulation of myoblast differentiation	6/871	86/28891	0.045564	0.124949	0.0810255	Arid1b/Mapk14/Smarcc2/Flot2/Pik3r1/Zfp36l1	6	GO_BP	down
GO:0072078	nephron tubule morphogenesis	6/871	86/28891	0.045564	0.124949	0.0810255	Npnt/Greb1l/Gli3/Cd44/Hs3st3a1/Gpc3	6	GO_BP	down
GO:2000781	positive regulation of double-strand break repair	6/871	86/28891	0.045564	0.124949	0.0810255	Arid1b/Mbtd1/Smarcc2/Bcl7a/Rif1/Spidr	6	GO_BP	down
GO:0019724	B cell mediated immunity	15/871	306/28891	0.0456738	0.125184	0.0811782	H2-D1/H2-K1/H2-T22/Rif1/Trp53bp1/Irf7/H2-Q4/Nbn/H2-Q7/Swap70/H2-Q6/H2-Q2/H2-M2/C3/Fcer2a	15	GO_BP	down
GO:0031056	regulation of histone modification	4/871	45/28891	0.0461216	0.125753	0.0815473	Auts2/Dek/Ep300/Kansl1	4	GO_BP	down
GO:0042771	intrinsic apoptotic signaling pathway in response to DNA damage by p53 class mediator	4/871	45/28891	0.0461216	0.125753	0.0815473	Trp63/Ep300/Hipk2/Cd44	4	GO_BP	down
GO:0045815	transcription initiation-coupled chromatin remodeling	4/871	45/28891	0.0461216	0.125753	0.0815473	Nr3c1/Kdm2a/Ep300/Kdm1b	4	GO_BP	down
GO:0050918	positive chemotaxis	4/871	45/28891	0.0461216	0.125753	0.0815473	Ptprj/Prkca/Vegfb/Angpt1	4	GO_BP	down
GO:0072337	modified amino acid transport	4/871	45/28891	0.0461216	0.125753	0.0815473	Slc38a2/Slc7a6/Slc7a7/Abcc5	4	GO_BP	down
GO:0140632	canonical inflammasome complex assembly	4/871	45/28891	0.0461216	0.125753	0.0815473	Stmp1/Ptpn22/Trim30a/Prkd1	4	GO_BP	down
GO:1900181	negative regulation of protein localization to nucleus	4/871	45/28891	0.0461216	0.125753	0.0815473	Otud7b/Mfhas1/Dclk1/Angpt1	4	GO_BP	down
GO:1905145	cellular response to acetylcholine	4/871	45/28891	0.0461216	0.125753	0.0815473	Gnaq/Large1/Ly6h/Lypd1	4	GO_BP	down
GO:2000785	regulation of autophagosome assembly	4/871	45/28891	0.0461216	0.125753	0.0815473	Pikfyve/Mtmr3/Snx30/Tbc1d12	4	GO_BP	down
GO:2001258	negative regulation of cation channel activity	4/871	45/28891	0.0461216	0.125753	0.0815473	Ank3/Gem/Pkd2/Grp	4	GO_BP	down
GO:0002762	negative regulation of myeloid leukocyte differentiation	5/871	65/28891	0.0461863	0.125864	0.0816191	Pik3r1/Tjp2/Sfrp1/Fbn1/Lrrc17	5	GO_BP	down
GO:0022613	ribonucleoprotein complex biogenesis	20/871	440/28891	0.046351	0.125918	0.0816543	Snrpg/Ddx17/Cpsf6/Rps27/Ddx10/Mbnl1/Celf2/Srpk1/Aatf/Wdr43/Prpf39/Adar/Atm/Atr/Pdcd11/Prpf8/Naf1/Setx/Drosha/Eif2s3y	20	GO_BP	down
GO:0002070	epithelial cell maturation	3/871	27/28891	0.0466873	0.125918	0.0816543	Hif1a/Fem1b/Kcnma1	3	GO_BP	down
GO:0006582	melanin metabolic process	3/871	27/28891	0.0466873	0.125918	0.0816543	Rapgef2/Mfsd12/Myo5a	3	GO_BP	down
GO:0009264	deoxyribonucleotide catabolic process	3/871	27/28891	0.0466873	0.125918	0.0816543	Dpyd/Samhd1/Xdh	3	GO_BP	down
GO:0010839	negative regulation of keratinocyte proliferation	3/871	27/28891	0.0466873	0.125918	0.0816543	Med1/Ptprk/Zeb1	3	GO_BP	down
GO:0034368	protein-lipid complex remodeling	3/871	27/28891	0.0466873	0.125918	0.0816543	Abcg1/Apoe/Lpl	3	GO_BP	down
GO:0034369	plasma lipoprotein particle remodeling	3/871	27/28891	0.0466873	0.125918	0.0816543	Abcg1/Apoe/Lpl	3	GO_BP	down
GO:0034695	response to prostaglandin E	3/871	27/28891	0.0466873	0.125918	0.0816543	Tgfbr3/Prkce/Ccl19	3	GO_BP	down
GO:0035988	chondrocyte proliferation	3/871	27/28891	0.0466873	0.125918	0.0816543	Ext1/Bmpr2/Grn	3	GO_BP	down
GO:0042104	positive regulation of activated T cell proliferation	3/871	27/28891	0.0466873	0.125918	0.0816543	Stat5b/Stat5a/Igfbp2	3	GO_BP	down
GO:0042753	positive regulation of circadian rhythm	3/871	27/28891	0.0466873	0.125918	0.0816543	Btrc/Rora/Nlgn1	3	GO_BP	down
GO:0044550	secondary metabolite biosynthetic process	3/871	27/28891	0.0466873	0.125918	0.0816543	Rapgef2/Mfsd12/Myo5a	3	GO_BP	down
GO:0045981	positive regulation of nucleotide metabolic process	3/871	27/28891	0.0466873	0.125918	0.0816543	Stat3/Prkn/Bcl2l1	3	GO_BP	down
GO:0046685	response to arsenic-containing substance	3/871	27/28891	0.0466873	0.125918	0.0816543	Slc38a2/Nr3c1/As3mt	3	GO_BP	down
GO:0050765	negative regulation of phagocytosis	3/871	27/28891	0.0466873	0.125918	0.0816543	Cd47/Cnn2/Plscr2	3	GO_BP	down
GO:0060339	negative regulation of type I interferon-mediated signaling pathway	3/871	27/28891	0.0466873	0.125918	0.0816543	Stat2/Adar/Samhd1	3	GO_BP	down
GO:0062009	secondary palate development	3/871	27/28891	0.0466873	0.125918	0.0816543	Tgfbr3/Tshz1/Fzd2	3	GO_BP	down
GO:0071577	zinc ion transmembrane transport	3/871	27/28891	0.0466873	0.125918	0.0816543	Slc39a11/Trpm2/Slc30a2	3	GO_BP	down
GO:0097396	response to interleukin-17	3/871	27/28891	0.0466873	0.125918	0.0816543	Usp25/Stat3/Traf5	3	GO_BP	down
GO:1900544	positive regulation of purine nucleotide metabolic process	3/871	27/28891	0.0466873	0.125918	0.0816543	Stat3/Prkn/Bcl2l1	3	GO_BP	down
GO:0010212	response to ionizing radiation	8/871	132/28891	0.0468307	0.12611	0.0817788	Tank/Mapk14/Bcl2l1/Atm/Wrn/Atr/Sfrp1/Spidr	8	GO_BP	down
GO:0034219	carbohydrate transmembrane transport	8/871	132/28891	0.0468307	0.12611	0.0817788	Braf/Mapk14/Oga/Stxbp4/Prkca/Gpc3/C3/Grb10	8	GO_BP	down
GO:0045739	positive regulation of DNA repair	8/871	132/28891	0.0468307	0.12611	0.0817788	Eya4/Arid1b/Mbtd1/Smarcc2/Bcl7a/Rif1/Egfr/Spidr	8	GO_BP	down
GO:0016525	negative regulation of angiogenesis	7/871	109/28891	0.0470185	0.126356	0.081938	Krit1/Fbln5/Hhip/Serpinf1/Ecscr/Ptn/Sema3e	7	GO_BP	down
GO:0046364	monosaccharide biosynthetic process	7/871	109/28891	0.0470185	0.126356	0.081938	Hif1a/Nr3c1/Supt20/Ppp4r3a/Tpi1/Ep300/Ddb1	7	GO_BP	down
GO:0071901	negative regulation of protein serine/threonine kinase activity	7/871	109/28891	0.0470185	0.126356	0.081938	Cdk5rap2/Ptpn22/Ptprj/Gstp1/Sfrp1/Apoe/Slc8a1	7	GO_BP	down
GO:0090263	positive regulation of canonical Wnt signaling pathway	7/871	109/28891	0.0470185	0.126356	0.081938	Usp34/Lrrk1/Egfr/Sfrp1/Eda/Gpc3/Gpc5	7	GO_BP	down
GO:0008088	axo-dendritic transport	6/871	87/28891	0.0477473	0.128183	0.0831229	Ank3/Hif1a/Ap3b1/Flot2/Trak2/Myo5a	6	GO_BP	down
GO:0097120	receptor localization to synapse	6/871	87/28891	0.0477473	0.128183	0.0831229	Nbea/Neto2/Cep112/Nlgn1/Grip1/Magi2	6	GO_BP	down
GO:0032271	regulation of protein polymerization	11/871	206/28891	0.0485857	0.128382	0.0832518	Dyrk1a/Cyrib/Cdk5rap2/Tmsb10/Pde4dip/Prkce/Flii/Togaram1/Lmod1/Pak3/Alox15	11	GO_BP	down
GO:0001954	positive regulation of cell-matrix adhesion	5/871	66/28891	0.0487854	0.128382	0.0832518	Rin2/Iqgap1/Ptprj/Fut1/Pcsk5	5	GO_BP	down
GO:0042551	neuron maturation	5/871	66/28891	0.0487854	0.128382	0.0832518	Gnaq/Ank3/Kcnma1/Pmp22/C3	5	GO_BP	down
GO:0071715	icosanoid transport	5/871	66/28891	0.0487854	0.128382	0.0832518	Pnpla8/Abcc1/Slc22a7/Map2k6/Slco2b1	5	GO_BP	down
GO:1902692	regulation of neuroblast proliferation	5/871	66/28891	0.0487854	0.128382	0.0832518	Hif1a/Notch2/Kifap3/Gli3/Ptn	5	GO_BP	down
GO:0001838	embryonic epithelial tube formation	9/871	157/28891	0.0488485	0.128382	0.0832518	Luzp1/Hif1a/Kdm2a/Prkacb/Stk3/Ski/Adm/Sfrp1/Fzd2	9	GO_BP	down
GO:0002361	CD4-positive, CD25-positive, alpha-beta regulatory T cell differentiation	2/871	12/28891	0.0490476	0.128382	0.0832518	Ncor1/Tox	2	GO_BP	down
GO:0002664	regulation of T cell tolerance induction	2/871	12/28891	0.0490476	0.128382	0.0832518	Itch/Cblb	2	GO_BP	down
GO:0008228	opsonization	2/871	12/28891	0.0490476	0.128382	0.0832518	Cd47/Myo18a	2	GO_BP	down
GO:0010649	regulation of cell communication by electrical coupling	2/871	12/28891	0.0490476	0.128382	0.0832518	Ank3/Pde4d	2	GO_BP	down
GO:0010944	negative regulation of transcription by competitive promoter binding	2/871	12/28891	0.0490476	0.128382	0.0832518	Kdm2a/Hdac4	2	GO_BP	down
GO:0014842	regulation of skeletal muscle satellite cell proliferation	2/871	12/28891	0.0490476	0.128382	0.0832518	Stat3/Angpt1	2	GO_BP	down
GO:0015838	amino-acid betaine transport	2/871	12/28891	0.0490476	0.128382	0.0832518	Slc38a2/Slc7a6	2	GO_BP	down
GO:0016926	protein desumoylation	2/871	12/28891	0.0490476	0.128382	0.0832518	Senp7/Hint1	2	GO_BP	down
GO:0030202	heparin metabolic process	2/871	12/28891	0.0490476	0.128382	0.0832518	Ext1/Angpt1	2	GO_BP	down
GO:0038180	nerve growth factor signaling pathway	2/871	12/28891	0.0490476	0.128382	0.0832518	Rapgef2/Magi2	2	GO_BP	down
GO:0042994	cytoplasmic sequestering of transcription factor	2/871	12/28891	0.0490476	0.128382	0.0832518	Pkd1/Pkd2	2	GO_BP	down
GO:0043301	negative regulation of leukocyte degranulation	2/871	12/28891	0.0490476	0.128382	0.0832518	Bcr/Lgals9	2	GO_BP	down
GO:0043653	mitochondrial fragmentation involved in apoptotic process	2/871	12/28891	0.0490476	0.128382	0.0832518	Prkn/Bnip3	2	GO_BP	down
GO:0045588	positive regulation of gamma-delta T cell differentiation	2/871	12/28891	0.0490476	0.128382	0.0832518	Stat5b/Stat5a	2	GO_BP	down
GO:0046645	positive regulation of gamma-delta T cell activation	2/871	12/28891	0.0490476	0.128382	0.0832518	Stat5b/Stat5a	2	GO_BP	down
GO:0048934	peripheral nervous system neuron differentiation	2/871	12/28891	0.0490476	0.128382	0.0832518	Ascl1/Pmp22	2	GO_BP	down
GO:0048935	peripheral nervous system neuron development	2/871	12/28891	0.0490476	0.128382	0.0832518	Ascl1/Pmp22	2	GO_BP	down
GO:0050774	negative regulation of dendrite morphogenesis	2/871	12/28891	0.0490476	0.128382	0.0832518	Rapgef2/Ywhah	2	GO_BP	down
GO:0051121	hepoxilin metabolic process	2/871	12/28891	0.0490476	0.128382	0.0832518	Gstp1/Alox15	2	GO_BP	down
GO:0051122	hepoxilin biosynthetic process	2/871	12/28891	0.0490476	0.128382	0.0832518	Gstp1/Alox15	2	GO_BP	down
GO:0051901	positive regulation of mitochondrial depolarization	2/871	12/28891	0.0490476	0.128382	0.0832518	Oga/Tspo	2	GO_BP	down
GO:0051964	negative regulation of synapse assembly	2/871	12/28891	0.0490476	0.128382	0.0832518	Epha7/Robo1	2	GO_BP	down
GO:0060013	righting reflex	2/871	12/28891	0.0490476	0.128382	0.0832518	Auts2/Pcdh15	2	GO_BP	down
GO:0060020	Bergmann glial cell differentiation	2/871	12/28891	0.0490476	0.128382	0.0832518	Plpp3/Vim	2	GO_BP	down
GO:0060297	regulation of sarcomere organization	2/871	12/28891	0.0490476	0.128382	0.0832518	Ep300/Prkd1	2	GO_BP	down
GO:0060525	prostate glandular acinus development	2/871	12/28891	0.0490476	0.128382	0.0832518	Trp63/Sfrp1	2	GO_BP	down
GO:0060767	epithelial cell proliferation involved in prostate gland development	2/871	12/28891	0.0490476	0.128382	0.0832518	Ar/Serpinf1	2	GO_BP	down
GO:0060872	semicircular canal development	2/871	12/28891	0.0490476	0.128382	0.0832518	Gli3/Zeb1	2	GO_BP	down
GO:0061669	spontaneous neurotransmitter secretion	2/871	12/28891	0.0490476	0.128382	0.0832518	Prkn/Syt1	2	GO_BP	down
GO:0070202	regulation of establishment of protein localization to chromosome	2/871	12/28891	0.0490476	0.128382	0.0832518	Cct4/Spidr	2	GO_BP	down
GO:0070244	negative regulation of thymocyte apoptotic process	2/871	12/28891	0.0490476	0.128382	0.0832518	Hif1a/Kifap3	2	GO_BP	down
GO:0070831	basement membrane assembly	2/871	12/28891	0.0490476	0.128382	0.0832518	Phldb2/Lamb3	2	GO_BP	down
GO:0071372	cellular response to follicle-stimulating hormone stimulus	2/871	12/28891	0.0490476	0.128382	0.0832518	Pde4d/Efna5	2	GO_BP	down
GO:0090160	Golgi to lysosome transport	2/871	12/28891	0.0490476	0.128382	0.0832518	Ccdc91/Ap1g1	2	GO_BP	down
GO:0090385	phagosome-lysosome fusion	2/871	12/28891	0.0490476	0.128382	0.0832518	Pikfyve/Rab34	2	GO_BP	down
GO:0097090	presynaptic membrane organization	2/871	12/28891	0.0490476	0.128382	0.0832518	Apoe/Nlgn1	2	GO_BP	down
GO:0097400	interleukin-17-mediated signaling pathway	2/871	12/28891	0.0490476	0.128382	0.0832518	Usp25/Traf5	2	GO_BP	down
GO:0099532	synaptic vesicle endosomal processing	2/871	12/28891	0.0490476	0.128382	0.0832518	Vti1a/Bcl2l1	2	GO_BP	down
GO:1903377	negative regulation of oxidative stress-induced neuron intrinsic apoptotic signaling pathway	2/871	12/28891	0.0490476	0.128382	0.0832518	Hif1a/Prkn	2	GO_BP	down
GO:1905456	regulation of lymphoid progenitor cell differentiation	2/871	12/28891	0.0490476	0.128382	0.0832518	Fnip1/Sos1	2	GO_BP	down
GO:1905907	negative regulation of amyloid fibril formation	2/871	12/28891	0.0490476	0.128382	0.0832518	Apoe/Ldlr	2	GO_BP	down
GO:1905941	positive regulation of gonad development	2/871	12/28891	0.0490476	0.128382	0.0832518	Sema3a/Zfpm2	2	GO_BP	down
GO:2000018	regulation of male gonad development	2/871	12/28891	0.0490476	0.128382	0.0832518	Sema3a/Zfpm2	2	GO_BP	down
[truncated: 3,236 more rows]

## Sheet: TEC Progenitors
ID	Description	GeneRatio	BgRatio	pvalue	p.adjust	qvalue	geneID	Count	Cluster	Direction
GO:0045088	regulation of innate immune response	70/916	474/28891	4.52128e-27	2.36644e-23	1.52486e-23	Pik3r1/Stmp1/Trafd1/Rps19/Pcbp2/Grn/Ifi35/Ankrd17/Slc46a2/Prkce/Irf1/Tap2/H2-D1/Pspc1/Trim12a/Nfkbia/Zc3hav1/Eif2ak2/Prkdc/S100a14/H2-M3/Rps6ka3/Nmi/Irgm1/Lgals9/Isg15/Parp14/Dhx58/Plscr2/Trim25/Ifih1/H2-K1/Nfkbiz/Trim5/H2-T22/Alpk1/Trim12c/Igtp/Apoe/Stat2/Ifi203/Samhd1/Tap1/Rigi/Esr1/Gbp2/Zbp1/H2-Q4/Mndal/Ddx60/Oas1a/Prkd1/H2-Q2/Irf7/Ifi211/Serpinb1a/H2-Q7/Gbp3/Nlrc5/Gbp7/Cav1/H2-Q6/Trim30a/Gbp5…	70	GO_BP	down
GO:0045089	positive regulation of innate immune response	57/916	385/28891	2.71728e-22	5.40441e-19	3.48244e-19	Pik3r1/Stmp1/Rps19/Ifi35/Ankrd17/Slc46a2/Prkce/Irf1/H2-D1/Pspc1/Trim12a/Nfkbia/Zc3hav1/Eif2ak2/Prkdc/S100a14/H2-M3/Rps6ka3/Nmi/Irgm1/Lgals9/Dhx58/Plscr2/Trim25/Ifih1/H2-K1/Nfkbiz/Trim5/H2-T22/Alpk1/Trim12c/Igtp/Ifi203/Rigi/Esr1/Gbp2/Zbp1/H2-Q4/Mndal/Ddx60/Oas1a/Prkd1/H2-Q2/Irf7/Ifi211/H2-Q7/Gbp3/Nlrc5/Gbp7/Cav1/H2-Q6/Trim30a/Gbp5/Trim30d/Rsad2/Ifi204/H2-M2	57	GO_BP	down
GO:0002833	positive regulation of response to biotic stimulus	59/916	413/28891	3.09767e-22	5.40441e-19	3.48244e-19	Pik3r1/Stmp1/Rps19/Grn/Ifi35/Ankrd17/Slc46a2/Prkce/Irf1/H2-D1/Pspc1/Trim12a/Nfkbia/Zc3hav1/Eif2ak2/Prkdc/S100a14/H2-M3/Rps6ka3/Nmi/Irgm1/Lgals9/Dhx58/Plscr2/Trim25/Ifih1/H2-K1/Nfkbiz/Trim5/H2-T22/Alpk1/Trim12c/Igtp/Ifi203/Rigi/Esr1/Prkca/Gbp2/Zbp1/H2-Q4/Mndal/Ddx60/Oas1a/Prkd1/H2-Q2/Irf7/Ifi211/H2-Q7/Gbp3/Nlrc5/Gbp7/Cav1/H2-Q6/Trim30a/Gbp5/Trim30d/Rsad2/Ifi204/H2-M2	59	GO_BP	down
GO:0009615	response to virus	54/916	389/28891	7.20676e-20	9.43004e-17	6.07643e-17	Ifitm2/Ext1/Stat1/Pcbp2/Ifitm3/Trim35/Lgals8/Nck1/Irf1/Oasl2/Trim12a/Zc3hav1/Bst2/Eif2ak2/Nmi/Irgm1/Fmr1/Lgals9/Cxadr/Isg15/Dhx58/Plscr2/Trim25/Ifih1/Trim5/Trim12c/Igtp/Slfn8/Stat2/Rtp4/Tgtp1/Shfl/Samhd1/Isg20/Rigi/Ifi27l2a/Slfn9/Htra1/Zbp1/Ddx60/Oas1a/Irf7/Ifit1/Gli2/Gbp3/Lcn2/Gbp7/Mx2/Ifit3/Trim30a/Gbp5/Ifit3b/Trim30d/Rsad2	54	GO_BP	down
GO:0002218	activation of innate immune response	44/916	281/28891	1.94274e-18	2.03366e-15	1.31043e-15	Pik3r1/Stmp1/Ifi35/Ankrd17/Slc46a2/Prkce/Irf1/Pspc1/Trim12a/Nfkbia/Zc3hav1/Eif2ak2/Prkdc/S100a14/Rps6ka3/Nmi/Irgm1/Dhx58/Trim25/Ifih1/Nfkbiz/Trim5/Alpk1/Trim12c/Igtp/Ifi203/Rigi/Esr1/Gbp2/Zbp1/Mndal/Ddx60/Oas1a/Prkd1/Irf7/Ifi211/Gbp3/Gbp7/Cav1/Trim30a/Gbp5/Trim30d/Rsad2/Ifi204	44	GO_BP	down
GO:0035456	response to interferon-beta	24/916	74/28891	3.08678e-18	2.6927e-15	1.73509e-15	Ifitm2/Stat1/Ifitm3/Irf1/Bst2/Irgm1/Plscr2/Xaf1/Igtp/Gbp6/Tgtp1/Shfl/Ifi203/Gbp2/Gm12185/Mndal/Oas1a/Ifit1/Ifi211/Ifi47/Gbp3/Gbp7/Ifit3/Ifi204	24	GO_BP	down
GO:0051607	defense response to virus	45/916	328/28891	1.4334e-16	1.05416e-13	6.79269e-14	Ifitm2/Stat1/Pcbp2/Ifitm3/Trim35/Nck1/Irf1/Oasl2/Trim12a/Zc3hav1/Bst2/Eif2ak2/Irgm1/Cxadr/Isg15/Dhx58/Plscr2/Trim25/Ifih1/Trim5/Trim12c/Igtp/Slfn8/Stat2/Rtp4/Shfl/Samhd1/Isg20/Rigi/Slfn9/Htra1/Zbp1/Ddx60/Oas1a/Irf7/Ifit1/Gbp3/Gbp7/Mx2/Ifit3/Trim30a/Gbp5/Ifit3b/Trim30d/Rsad2	45	GO_BP	down
GO:0140546	defense response to symbiont	45/916	329/28891	1.61125e-16	1.05416e-13	6.79269e-14	Ifitm2/Stat1/Pcbp2/Ifitm3/Trim35/Nck1/Irf1/Oasl2/Trim12a/Zc3hav1/Bst2/Eif2ak2/Irgm1/Cxadr/Isg15/Dhx58/Plscr2/Trim25/Ifih1/Trim5/Trim12c/Igtp/Slfn8/Stat2/Rtp4/Shfl/Samhd1/Isg20/Rigi/Slfn9/Htra1/Zbp1/Ddx60/Oas1a/Irf7/Ifit1/Gbp3/Gbp7/Mx2/Ifit3/Trim30a/Gbp5/Ifit3b/Trim30d/Rsad2	45	GO_BP	down
GO:0048525	negative regulation of viral process	25/916	105/28891	2.14664e-15	1.24839e-12	8.04424e-13	Ifitm2/Stat1/Ifitm3/Sp100/Ciita/Oasl2/Trim12a/Zc3hav1/Bst2/Eif2ak2/Fbln1/Zfp36/Isg15/Plscr2/Trim25/Ifih1/Trim5/Trim12c/Shfl/Isg20/Oas1a/Mx2/Trim30a/Trim30d/Rsad2	25	GO_BP	down
GO:0050678	regulation of epithelial cell proliferation	49/916	426/28891	7.96438e-15	4.16856e-12	2.68609e-12	Eya1/Cdh3/Stat1/Grn/Zfas1/Klf9/Itgb3bp/Myc/Suz12/Ang/Krit1/Jun/Yap1/Col18a1/Vegfb/Stat3/Irs2/Prkdc/Gja1/Tgfbr3/Zfp36/Smo/Pgr/Xdh/Cxadr/Akt3/Ift74/Ift57/Fmc1/Apoe/Zfp36l1/Esr1/Prkca/Robo1/Gpc3/Ptprk/B2m/Htra1/Ar/Prkd1/Gli2/Cdk6/Zfp703/Nr4a1/Ptn/Cav1/Serpinf1/Dab2/Vegfc	49	GO_BP	down
GO:0019884	antigen processing and presentation of exogenous antigen	19/916	60/28891	1.66023e-14	7.89966e-12	5.0903e-12	H2-DMa/H2-Ab1/H2-Eb1/Psme1/Tap2/H2-D1/H2-M3/H2-K1/Cd1d1/H2-T22/B2m/H2-Oa/H2-Q4/H2-Q2/H2-Eb2/H2-Q7/H2-DMb2/H2-Q6/H2-M2	19	GO_BP	down
GO:0034341	response to type II interferon	28/916	150/28891	3.44705e-14	1.50349e-11	9.68803e-12	Ifitm2/Stat1/Ifitm3/H2-Ab1/Slk/H2-Eb1/Sp100/Ciita/Irf1/Cxcl16/Bst2/Irgm1/Parp14/Igtp/Gbp6/Slc22a5/Ccl25/Myo18a/Tgtp1/Shfl/Gbp2/Irf8/Gbp8/H2-Q7/Gbp3/Nlrc5/Gbp7/Gbp5	28	GO_BP	down
GO:0050792	regulation of viral process	30/916	187/28891	2.75145e-13	1.10778e-10	7.13818e-11	Ifitm2/Stat1/Ifitm3/Stau1/Sp100/Ciita/Oasl2/Trim12a/Zc3hav1/Bst2/Eif2ak2/Axl/Fbln1/Zfp36/Fmr1/Isg15/Plscr2/Trim25/Ifih1/Trim5/Trim12c/Shfl/Isg20/Oas1a/Gbp3/Gbp7/Mx2/Trim30a/Trim30d/Rsad2	30	GO_BP	down
GO:0002478	antigen processing and presentation of exogenous peptide antigen	17/916	53/28891	3.15972e-13	1.18128e-10	7.61183e-11	H2-DMa/H2-Ab1/H2-Eb1/Tap2/H2-D1/H2-M3/H2-K1/H2-T22/B2m/H2-Oa/H2-Q4/H2-Q2/H2-Eb2/H2-Q7/H2-DMb2/H2-Q6/H2-M2	17	GO_BP	down
GO:0045824	negative regulation of innate immune response	25/916	130/28891	4.00508e-13	1.39751e-10	9.00512e-11	Trafd1/Rps19/Pcbp2/Grn/Tap2/H2-D1/Prkdc/Nmi/Lgals9/Isg15/Parp14/Dhx58/H2-K1/H2-T22/Stat2/Samhd1/Tap1/H2-Q4/Oas1a/H2-Q2/H2-Q7/Nlrc5/H2-Q6/Serping1/H2-M2	25	GO_BP	down
GO:0031400	negative regulation of protein modification process	49/916	473/28891	4.38473e-13	1.43435e-10	9.24254e-11	Rps7/Rack1/Prnp/Oxr1/Plpp3/Hipk3/Dtnbp1/Igbp1/Tspo/Cnksr3/Ctdsp1/Nck1/Wwtr1/Prkce/Suz12/Irf1/Jun/Ctdsp2/Crtap/Hdac8/Prkdc/Fbln1/Dbi/Cblb/Aida/Pde4d/Xdh/Lrrk1/Isg15/Parp14/Parp10/Dusp1/Hgf/Apoe/Ppp1r15a/Ncoa7/Snta1/Prkca/Mgat5/Angpt1/Socs3/Pkia/Slc8a1/Gadd45g/Ntrk3/Cav1/Pecam1/Lrrk2/Slit2	49	GO_BP	down
GO:0035458	cellular response to interferon-beta	18/916	63/28891	6.0117e-13	1.8509e-10	1.19266e-10	Stat1/Irf1/Irgm1/Igtp/Gbp6/Tgtp1/Ifi203/Gbp2/Gm12185/Mndal/Oas1a/Ifit1/Ifi211/Ifi47/Gbp3/Gbp7/Ifit3/Ifi204	18	GO_BP	down
GO:0002832	negative regulation of response to biotic stimulus	29/916	187/28891	1.65121e-12	4.80134e-10	3.09384e-10	Trafd1/Rps19/Pcbp2/Grn/Tap2/H2-D1/Prkdc/Nmi/Irgm1/Lgals9/Isg15/Parp14/Dhx58/H2-K1/H2-T22/Igtp/Stat2/Samhd1/Tap1/Htra1/H2-Q4/Oas1a/H2-Q2/H2-Q7/Nlrc5/H2-Q6/Trim30a/Serping1/H2-M2	29	GO_BP	down
GO:0032102	negative regulation of response to external stimulus	48/916	485/28891	3.99678e-12	1.07703e-09	6.94005e-10	Ash1l/Trafd1/Rora/Rps19/Pcbp2/Grn/Slc12a2/Tap2/H2-D1/Stat3/Prkdc/Zfp36/Nmi/Irgm1/Lgals9/Isg15/Parp14/Dhx58/Dusp1/H2-K1/Clasp2/H2-T22/Igtp/Hgf/Apoe/Stat2/Mmp28/Samhd1/Tap1/Sema3a/Neo1/Ldlr/Robo1/Htra1/H2-Q4/Oas1a/H2-Q2/Socs3/H2-Q7/Nlrc5/Adamts18/Nrp1/H2-Q6/Slit2/Trim30a/Sema3e/Serping1/H2-M2	48	GO_BP	down
GO:0046631	alpha-beta T cell activation	31/916	221/28891	4.2948e-12	1.07703e-09	6.94005e-10	Rora/H2-Ab1/Rc3h1/Runx1/Bcl6/Gli3/Myc/Irf1/Anxa1/H2-D1/Stat3/H2-M3/Cblb/Irgm1/Lgals9/H2-K1/Cd1d1/Nfkbiz/H2-T22/Igtp/Relb/Zbtb16/H2-Q4/Pnp/H2-Q2/H2-Q7/Gadd45g/H2-Q6/Psmb11/Rsad2/H2-M2	31	GO_BP	down
GO:1903900	regulation of viral life cycle	26/916	156/28891	4.32128e-12	1.07703e-09	6.94005e-10	Ifitm2/Ifitm3/Stau1/Ciita/Oasl2/Trim12a/Zc3hav1/Bst2/Eif2ak2/Axl/Fmr1/Isg15/Plscr2/Trim25/Ifih1/Trim5/Trim12c/Shfl/Isg20/Oas1a/Gbp3/Gbp7/Mx2/Trim30a/Trim30d/Rsad2	26	GO_BP	down
GO:0019882	antigen processing and presentation	24/916	134/28891	5.86472e-12	1.39527e-09	8.99069e-10	H2-DMa/Ext1/H2-Ab1/H2-Eb1/Psme1/Psmb9/Tap2/H2-D1/H2-M3/H2-K1/Cd1d1/H2-T22/Relb/Tap1/B2m/H2-Oa/H2-Q4/Psmb8/H2-Q2/H2-Eb2/H2-Q7/H2-DMb2/H2-Q6/H2-M2	24	GO_BP	down
GO:0007159	leukocyte cell-cell adhesion	45/916	447/28891	1.06431e-11	2.42199e-09	1.56066e-09	Prnp/H2-DMa/Ext1/Ambra1/H2-Ab1/H2-Eb1/Rc3h1/Runx1/Bcl6/Gli3/Kitl/Il6st/Lgals8/Nck1/Irf1/Anxa1/H2-D1/Vcam1/Tmem131l/Flot2/Cblb/Irgm1/Msn/Lgals9/H2-K1/Cd1d1/Nfkbiz/H2-T22/Klf4/Ccl25/Zbtb16/B2m/H2-Oa/H2-Q4/Pnp/Pag1/H2-Q2/H2-Eb2/H2-Q7/H2-DMb2/Cav1/H2-Q6/Pecam1/H2-M2/Cfh	45	GO_BP	down
GO:0002221	pattern recognition receptor signaling pathway	31/916	233/28891	1.7358e-11	3.73845e-09	2.40894e-09	Pik3r1/Stmp1/Ifi35/Ankrd17/Slc46a2/Prkce/Irf1/Nfkbia/Zc3hav1/Eif2ak2/S100a14/Rps6ka3/Nmi/Irgm1/Dhx58/Trim25/Ifih1/Nfkbiz/Alpk1/Igtp/Rigi/Esr1/Gbp2/Ddx60/Oas1a/Prkd1/Irf7/Cav1/Trim30a/Gbp5/Rsad2	31	GO_BP	down
GO:0050870	positive regulation of T cell activation	34/916	277/28891	1.78566e-11	3.73845e-09	2.40894e-09	H2-DMa/Ambra1/H2-Ab1/H2-Eb1/Runx1/Bcl6/Gli3/Kitl/Il6st/Lgals8/Nck1/Irf1/Anxa1/H2-D1/Vcam1/Flot2/Irgm1/Lgals9/H2-K1/Cd1d1/Nfkbiz/H2-T22/Zbtb16/B2m/H2-Oa/H2-Q4/Pnp/H2-Q2/H2-Eb2/H2-Q7/H2-DMb2/Cav1/H2-Q6/H2-M2	34	GO_BP	down
GO:0030522	intracellular receptor signaling pathway	37/916	328/28891	2.84271e-11	5.72258e-09	3.68746e-09	Stmp1/Rora/Ankrd17/Klf9/Ddrgk1/Slc46a2/Irf1/Ncoa2/Yap1/Nfkbia/Stat3/Pdk3/Zc3hav1/Eif2ak2/Carm1/Ubr5/Irgm1/Pgr/Dhx58/Trim25/Ifih1/Klf2/Alpk1/Igtp/Rigi/Esr1/Gbp2/Ddx60/Oas1a/Ar/Prkd1/Irf7/Cav1/Dab2/Trim30a/Gbp5/Rsad2	37	GO_BP	down
GO:0050777	negative regulation of immune response	31/916	239/28891	3.36595e-11	6.12949e-09	3.94966e-09	Trafd1/Rps19/Pcbp2/Grn/Rc3h1/Bcl6/Irf1/Tap2/Anxa1/H2-D1/Wdr41/Prkdc/Nmi/Lgals9/Isg15/Parp14/Dhx58/H2-K1/H2-T22/Stat2/Samhd1/Tap1/H2-Q4/Oas1a/H2-Q2/H2-Q7/Nlrc5/H2-Q6/Col3a1/Serping1/H2-M2	31	GO_BP	down
GO:0030099	myeloid cell differentiation	46/916	480/28891	3.37954e-11	6.12949e-09	3.94966e-09	Pik3r1/Rps6/Actn1/Stat1/Cnot4/Rps19/Runx1/Bcl6/Kitl/Myc/Csf1/Jun/Junb/Nfkbia/Stat3/Maf/Prkdc/Tgfbr3/Zfp36/Ripk1/Cdin1/Ncoa6/Fas/Lrrk1/Isg15/Klf2/Kat7/Zfp385a/Fos/Large1/Zfp36l1/Relb/Prkca/Zbtb16/Gpc3/B2m/Klf10/Rabgap1l/Irf8/Camk4/Hmgb3/Cdk6/Flvcr1/Sox6/Dab2/Lrrc17	46	GO_BP	down
GO:0031348	negative regulation of defense response	37/916	330/28891	3.39616e-11	6.12949e-09	3.94966e-09	Ash1l/Trafd1/Rora/Rps19/Pcbp2/Grn/Tap2/H2-D1/Stat3/Prkdc/Zfp36/Nmi/Irgm1/Lgals9/Isg15/Parp14/Dhx58/H2-K1/H2-T22/Igtp/Hgf/Apoe/Stat2/Samhd1/Tap1/Ldlr/Htra1/H2-Q4/Oas1a/H2-Q2/Socs3/H2-Q7/Nlrc5/H2-Q6/Trim30a/Serping1/H2-M2	37	GO_BP	down
GO:0034329	cell junction assembly	46/916	481/28891	3.62589e-11	6.24177e-09	4.02201e-09	Pik3r1/Rps6/Actn1/Cdh3/Patj/Myo9a/Slk/Numb/Ctnnd2/Dock7/Pdlim5/Pclo/Efna5/Tjp1/Tns1/Gpm6b/Vcl/Adgrl2/Stau2/Gja1/Epb41l3/Arhgap6/Mycbp2/Clasp2/Ppp1r9a/Nrg1/Mpdz/Large1/Magi2/Prkca/Robo1/Il1rap/Ptprk/Kirrel3/Zfp703/Cdh8/Ntrk3/Flrt2/Col17a1/Cav1/Nrp1/Pecam1/Slit2/Nlgn1/Lingo2/Negr1	46	GO_BP	down
GO:0010563	negative regulation of phosphorus metabolic process	43/916	430/28891	3.81614e-11	6.24177e-09	4.02201e-09	Rack1/Prnp/Plpp3/Hipk3/Dtnbp1/Igbp1/Tspo/Cnksr3/Ctdsp1/Nck1/Wwtr1/Suz12/Irf1/Jun/Ctdsp2/Irs2/Prkdc/Fbln1/Cblb/Aida/Pde4d/Xdh/Lrrk1/Parp14/Dusp1/Birc3/Hgf/Apoe/Ppp1r15a/Prkca/Apoc1/Mgat5/Angpt1/Socs3/Pkia/Slc8a1/Gadd45g/Ntrk3/Cav1/Pecam1/Lrrk2/Slit2/Grb10	43	GO_BP	down
GO:0045936	negative regulation of phosphate metabolic process	43/916	430/28891	3.81614e-11	6.24177e-09	4.02201e-09	Rack1/Prnp/Plpp3/Hipk3/Dtnbp1/Igbp1/Tspo/Cnksr3/Ctdsp1/Nck1/Wwtr1/Suz12/Irf1/Jun/Ctdsp2/Irs2/Prkdc/Fbln1/Cblb/Aida/Pde4d/Xdh/Lrrk1/Parp14/Dusp1/Birc3/Hgf/Apoe/Ppp1r15a/Prkca/Apoc1/Mgat5/Angpt1/Socs3/Pkia/Slc8a1/Gadd45g/Ntrk3/Cav1/Pecam1/Lrrk2/Slit2/Grb10	43	GO_BP	down
GO:0007249	canonical NF-kappaB signal transduction	32/916	258/28891	5.32589e-11	8.40257e-09	5.41437e-09	Ash1l/Usp25/Rora/Stat1/Ankrd17/Edaradd/Ddrgk1/Prkce/Irf1/Rel/Trim12a/Nfkbia/Zc3hav1/Ripk1/Irgm1/Eda/Trim25/Irak1bp1/Trim5/Alpk1/Trim12c/Igtp/Myo18a/Relb/Esr1/Angpt1/Prkd1/Gbp3/Gbp7/Trim30a/Trim30d/Ppm1n	32	GO_BP	down
GO:1903706	regulation of hemopoiesis	44/916	452/28891	5.4583e-11	8.40257e-09	5.41437e-09	Pik3r1/H2-DMa/Stat1/Cnot4/Ambra1/Rc3h1/Tsc22d1/Runx1/Bcl6/Gli3/Kitl/Slc46a2/Myc/Csf1/Irf1/Jun/Anxa1/Nfkbia/Stat3/Axl/Prkdc/Zfp36/Tmem131l/Ripk1/Irgm1/Fas/Lgals9/Isg15/Atp11c/Cd1d1/Kat7/Nfkbiz/Fos/Zfp36l1/Prkca/Zbtb16/B2m/H2-Oa/Klf10/Pnp/Hmgb3/Cdk6/Ptn/Lrrc17	44	GO_BP	down
GO:0002758	innate immune response-activating signaling pathway	31/916	244/28891	5.74575e-11	8.59236e-09	5.53665e-09	Pik3r1/Stmp1/Ifi35/Ankrd17/Slc46a2/Prkce/Irf1/Nfkbia/Zc3hav1/Eif2ak2/S100a14/Rps6ka3/Nmi/Irgm1/Dhx58/Trim25/Ifih1/Nfkbiz/Alpk1/Igtp/Rigi/Esr1/Gbp2/Ddx60/Oas1a/Prkd1/Irf7/Cav1/Trim30a/Gbp5/Rsad2	31	GO_BP	down
GO:0022409	positive regulation of cell-cell adhesion	38/916	354/28891	6.72397e-11	9.77591e-09	6.2993e-09	Ank3/H2-DMa/Plpp3/Ambra1/H2-Ab1/H2-Eb1/Runx1/Bcl6/Gli3/Kitl/Tjp1/Il6st/Lgals8/Nck1/Irf1/Anxa1/H2-D1/Vcam1/Flot2/Irgm1/Pde4d/Lgals9/H2-K1/Cd1d1/Nfkbiz/H2-T22/Zbtb16/B2m/H2-Oa/H2-Q4/Pnp/H2-Q2/H2-Eb2/H2-Q7/H2-DMb2/Cav1/H2-Q6/H2-M2	38	GO_BP	down
GO:0042326	negative regulation of phosphorylation	39/916	372/28891	7.67757e-11	1.08607e-08	6.99828e-09	Rack1/Prnp/Plpp3/Hipk3/Dtnbp1/Cnksr3/Ctdsp1/Nck1/Wwtr1/Suz12/Irf1/Jun/Ctdsp2/Irs2/Prkdc/Fbln1/Cblb/Aida/Pde4d/Xdh/Lrrk1/Parp14/Dusp1/Birc3/Hgf/Apoe/Ppp1r15a/Prkca/Angpt1/Socs3/Pkia/Slc8a1/Gadd45g/Ntrk3/Cav1/Pecam1/Lrrk2/Slit2/Grb10	39	GO_BP	down
GO:1903037	regulation of leukocyte cell-cell adhesion	41/916	407/28891	8.69005e-11	1.19694e-08	7.71272e-09	Prnp/H2-DMa/Ambra1/H2-Ab1/H2-Eb1/Rc3h1/Runx1/Bcl6/Gli3/Kitl/Il6st/Lgals8/Nck1/Irf1/Anxa1/H2-D1/Vcam1/Tmem131l/Flot2/Cblb/Irgm1/Lgals9/H2-K1/Cd1d1/Nfkbiz/H2-T22/Klf4/Ccl25/Zbtb16/B2m/H2-Oa/H2-Q4/Pnp/Pag1/H2-Q2/H2-Eb2/H2-Q7/H2-DMb2/Cav1/H2-Q6/H2-M2	41	GO_BP	down
GO:0048002	antigen processing and presentation of peptide antigen	18/916	83/28891	9.55904e-11	1.28287e-08	8.26644e-09	H2-DMa/H2-Ab1/H2-Eb1/Tap2/H2-D1/H2-M3/H2-K1/H2-T22/Tap1/B2m/H2-Oa/H2-Q4/H2-Q2/H2-Eb2/H2-Q7/H2-DMb2/H2-Q6/H2-M2	18	GO_BP	down
GO:0050863	regulation of T cell activation	41/916	411/28891	1.17456e-10	1.53692e-08	9.90343e-09	Prnp/H2-DMa/Ambra1/H2-Ab1/H2-Eb1/Rc3h1/Runx1/Bcl6/Gli3/Kitl/Il6st/Lgals8/Nck1/Slc46a2/Irf1/Anxa1/H2-D1/Vcam1/Tmem131l/Flot2/Cblb/Irgm1/Fas/Lgals9/H2-K1/Cd1d1/Nfkbiz/H2-T22/Zbtb16/B2m/H2-Oa/H2-Q4/Pnp/Pag1/H2-Q2/H2-Eb2/H2-Q7/H2-DMb2/Cav1/H2-Q6/H2-M2	41	GO_BP	down
GO:0099173	postsynapse organization	31/916	252/28891	1.31111e-10	1.67374e-08	1.07851e-08	Prnp/Myo9a/Gphn/Dtnbp1/Marcks/Numb/Ctnnd2/Dock7/Pdlim5/Igf1r/Tanc2/Rbmx/Dlg2/Stau2/Myh10/Ppp1r9a/Glrb/Apoe/Homer1/Magi2/Caprin2/Il1rap/Nrcam/Pak3/Ntrk3/Ptn/Nrp1/Lrrk2/Dock10/Nlgn1/Epha5	31	GO_BP	down
GO:0050803	regulation of synapse structure or activity	35/916	317/28891	1.76188e-10	2.19563e-08	1.4148e-08	Prnp/Pik3r1/Dtnbp1/Marcks/Numb/Pdlim5/Efna5/Tanc2/Rbmx/Adgrl2/Stau2/Fmr1/Myh10/Mycbp2/Ppp1r9a/Nrg1/Apoe/Homer1/Magi2/Prkca/Caprin2/Robo1/Il1rap/Sybu/Nrcam/Pak3/Cdh8/Ntrk3/Ptn/Flrt2/Lrrk2/Slit2/Nlgn1/Lingo2/Negr1	35	GO_BP	down
GO:0051251	positive regulation of lymphocyte activation	38/916	367/28891	1.92902e-10	2.34802e-08	1.51299e-08	H2-DMa/Ambra1/H2-Ab1/H2-Eb1/Runx1/Bcl6/Gli3/Kitl/Il6st/Lgals8/Nck1/Irf1/Anxa1/H2-D1/Vcam1/Irs2/Axl/Prkdc/Flot2/Irgm1/Lgals9/Atp11c/H2-K1/Cd1d1/Nfkbiz/H2-T22/Zbtb16/B2m/H2-Oa/H2-Q4/Pnp/H2-Q2/H2-Eb2/H2-Q7/H2-DMb2/Cav1/H2-Q6/H2-M2	38	GO_BP	down
GO:1903039	positive regulation of leukocyte cell-cell adhesion	34/916	303/28891	2.07918e-10	2.47328e-08	1.59371e-08	H2-DMa/Ambra1/H2-Ab1/H2-Eb1/Runx1/Bcl6/Gli3/Kitl/Il6st/Lgals8/Nck1/Irf1/Anxa1/H2-D1/Vcam1/Flot2/Irgm1/Lgals9/H2-K1/Cd1d1/Nfkbiz/H2-T22/Zbtb16/B2m/H2-Oa/H2-Q4/Pnp/H2-Q2/H2-Eb2/H2-Q7/H2-DMb2/Cav1/H2-Q6/H2-M2	34	GO_BP	down
GO:0002181	cytoplasmic translation	23/916	148/28891	3.14945e-10	3.66316e-08	2.36043e-08	Rps15/Rps7/Rpl35a/Rps4x/Rpl41/Rps12/Rps23/Rpl26/Rpl36/Rpl13/Rpl36a/Rpl38/Rps6/Rps28/Rpl37a/Rps19/Rpl23a/Rps21/Rps29/Nck1/Fmr1/Zfp385a/Eif2s3y	23	GO_BP	down
GO:0050807	regulation of synapse organization	34/916	309/28891	3.51333e-10	3.99756e-08	2.57591e-08	Prnp/Pik3r1/Dtnbp1/Marcks/Numb/Pdlim5/Efna5/Tanc2/Rbmx/Adgrl2/Stau2/Fmr1/Myh10/Mycbp2/Ppp1r9a/Nrg1/Apoe/Homer1/Magi2/Prkca/Caprin2/Robo1/Il1rap/Nrcam/Pak3/Cdh8/Ntrk3/Ptn/Flrt2/Lrrk2/Slit2/Nlgn1/Lingo2/Negr1	34	GO_BP	down
GO:0001933	negative regulation of protein phosphorylation	36/916	342/28891	3.67685e-10	4.09461e-08	2.63844e-08	Rack1/Prnp/Plpp3/Hipk3/Dtnbp1/Cnksr3/Ctdsp1/Nck1/Wwtr1/Suz12/Irf1/Jun/Ctdsp2/Prkdc/Fbln1/Cblb/Aida/Pde4d/Xdh/Lrrk1/Parp14/Dusp1/Hgf/Apoe/Ppp1r15a/Prkca/Angpt1/Socs3/Pkia/Slc8a1/Gadd45g/Ntrk3/Cav1/Pecam1/Lrrk2/Slit2	36	GO_BP	down
GO:0002753	cytosolic pattern recognition receptor signaling pathway	23/916	150/28891	4.14282e-10	4.5174e-08	2.91088e-08	Stmp1/Ankrd17/Slc46a2/Irf1/Nfkbia/Zc3hav1/Eif2ak2/Irgm1/Dhx58/Trim25/Ifih1/Alpk1/Igtp/Rigi/Gbp2/Ddx60/Oas1a/Prkd1/Irf7/Cav1/Trim30a/Gbp5/Rsad2	23	GO_BP	down
GO:0019058	viral life cycle	30/916	250/28891	4.77441e-10	5.07569e-08	3.27062e-08	Ifitm2/Pcbp2/Ifitm3/Stau1/Ciita/Oasl2/Trim12a/Zc3hav1/Bst2/Eif2ak2/Axl/Fmr1/Isg15/Plscr2/Trim25/Ifih1/Trim5/Trim12c/Apoe/Shfl/Isg20/Oas1a/Gbp3/Gbp7/Mx2/Cav1/Nrp1/Trim30a/Trim30d/Rsad2	30	GO_BP	down
GO:0016032	viral process	35/916	329/28891	4.84877e-10	5.07569e-08	3.27062e-08	Ifitm2/Stat1/Pcbp2/Ifitm3/Stau1/Sp100/Ciita/Jun/Oasl2/Trim12a/Zc3hav1/Bst2/Eif2ak2/Axl/Fbln1/Zfp36/Fmr1/Isg15/Plscr2/Trim25/Ifih1/Trim5/Trim12c/Apoe/Shfl/Isg20/Oas1a/Gbp3/Gbp7/Mx2/Cav1/Nrp1/Trim30a/Trim30d/Rsad2	35	GO_BP	down
GO:0002477	antigen processing and presentation of exogenous peptide antigen via MHC class Ib	11/916	29/28891	6.29021e-10	6.45548e-08	4.15972e-08	Tap2/H2-D1/H2-M3/H2-K1/H2-T22/B2m/H2-Q4/H2-Q2/H2-Q7/H2-Q6/H2-M2	11	GO_BP	down
GO:0046634	regulation of alpha-beta T cell activation	22/916	146/28891	1.39088e-09	1.39998e-07	9.02104e-08	H2-Ab1/Rc3h1/Runx1/Bcl6/Gli3/Irf1/Anxa1/H2-D1/Cblb/Irgm1/Lgals9/H2-K1/Cd1d1/Nfkbiz/H2-T22/Zbtb16/H2-Q4/Pnp/H2-Q2/H2-Q7/H2-Q6/H2-M2	22	GO_BP	down
GO:0045071	negative regulation of viral genome replication	14/916	56/28891	1.58194e-09	1.56224e-07	1.00666e-07	Ifitm2/Ifitm3/Oasl2/Zc3hav1/Bst2/Eif2ak2/Isg15/Plscr2/Ifih1/Shfl/Isg20/Oas1a/Mx2/Rsad2	14	GO_BP	down
GO:0002696	positive regulation of leukocyte activation	40/916	432/28891	1.77695e-09	1.70484e-07	1.09855e-07	H2-DMa/Ambra1/H2-Ab1/H2-Eb1/Runx1/Bcl6/Gli3/Kitl/Il6st/Lgals8/Nck1/Irf1/Anxa1/H2-D1/Vcam1/Irs2/Axl/Prkdc/Flot2/Irgm1/Lgals9/Atp11c/H2-K1/Cd1d1/Nfkbiz/H2-T22/Crlf2/Zbtb16/B2m/H2-Oa/H2-Q4/Pnp/H2-Q2/H2-Eb2/H2-Q7/H2-DMb2/Cav1/H2-Q6/Lrrk2/H2-M2	40	GO_BP	down
GO:0019221	cytokine-mediated signaling pathway	41/916	450/28891	1.79148e-09	1.70484e-07	1.09855e-07	Ifitm2/Usp25/Ext1/Stat1/Ifitm3/Il6st/Txndc17/Hdac4/Csf1/Irf1/Yap1/Oasl2/Nfkbia/Stat3/Il13ra1/Klf6/Axl/Ripk1/Irgm1/Isg15/Parp14/Eda/Ifih1/Ghr/Nfkbiz/Crlf2/Egr1/Igtp/Ccl25/Stat2/Samhd1/Robo1/Il1rap/Zbp1/Angpt1/Oas1a/Osmr/Irf7/Nlrc5/Cav1/Slit2	41	GO_BP	down
GO:0001763	morphogenesis of a branching structure	29/916	249/28891	1.86825e-09	1.74615e-07	1.12517e-07	Rere/Eya1/Ext1/Btbd7/Ctnnd2/Gli3/Myc/Csf1/Slc12a2/Yap1/Smo/Tnc/Pgr/Adm/Hgf/Cpe/Sema3a/Esr1/Hs3st3a1/Gpc3/Angpt1/Ar/Socs3/Gli2/Nrp1/Lrrk2/Slit2/Csmd1/Sema3e	29	GO_BP	down
GO:0050867	positive regulation of cell activation	41/916	454/28891	2.32163e-09	2.13183e-07	1.37369e-07	H2-DMa/Ambra1/H2-Ab1/H2-Eb1/Runx1/Bcl6/Gli3/Kitl/Il6st/Lgals8/Nck1/Irf1/Anxa1/H2-D1/Vcam1/Irs2/Axl/Prkdc/Flot2/Irgm1/Smo/Lgals9/Atp11c/H2-K1/Cd1d1/Nfkbiz/H2-T22/Crlf2/Zbtb16/B2m/H2-Oa/H2-Q4/Pnp/H2-Q2/H2-Eb2/H2-Q7/H2-DMb2/Cav1/H2-Q6/Lrrk2/H2-M2	41	GO_BP	down
GO:0002237	response to molecule of bacterial origin	39/916	421/28891	2.79759e-09	2.52458e-07	1.62677e-07	Hnrnpa0/Stat1/Pde4b/Prpf8/Prkce/Slc12a2/Cxcl16/Tap2/Trim12a/Nfkbia/Abca1/Eif2ak2/Axl/S100a14/H2-M3/Zfp36/Rps6ka3/Irgm1/Pde4d/Lgals9/Adm/Plscr2/Map2k3/Nfkbiz/Trim5/Trim12c/Igtp/Gbp6/Mgst1/Prkca/Gbp2/B2m/Irf8/Gbp3/Nr4a1/Trim30a/Gbp5/Trim30d/Cfh	39	GO_BP	down
GO:0042098	T cell proliferation	30/916	270/28891	3.025e-09	2.68353e-07	1.72919e-07	Prnp/Rps6/Rc3h1/Bcl6/Kitl/Il6st/Nck1/Myc/Psmb10/Irf1/Anxa1/H2-D1/Vcam1/Gja1/Tmem131l/Cblb/Irgm1/Msn/Lgals9/H2-K1/Cd1d1/H2-T22/H2-Q4/Pnp/H2-Q2/H2-Q7/H2-DMb2/Slfn2/H2-Q6/H2-M2	30	GO_BP	down
GO:0046635	positive regulation of alpha-beta T cell activation	18/916	103/28891	3.87286e-09	3.34047e-07	2.1525e-07	H2-Ab1/Runx1/Gli3/Irf1/Anxa1/H2-D1/Irgm1/H2-K1/Cd1d1/Nfkbiz/H2-T22/Zbtb16/H2-Q4/Pnp/H2-Q2/H2-Q7/H2-Q6/H2-M2	18	GO_BP	down
GO:0030198	extracellular matrix organization	33/916	322/28891	3.89318e-09	3.34047e-07	2.1525e-07	Serpinh1/Ext1/Prdx4/Gpm6b/Col18a1/Crtap/Mmp2/Ccdc80/Fbln1/Aebp1/Ltbp4/Antxr1/Clasp2/Myo1e/Prdm5/Col4a5/Large1/Mmp28/Col8a2/Fbln5/Mkx/Adamts18/Mmp9/Flrt2/Tgfbi/Col17a1/Myh11/Cav1/Csgalnact1/Col5a2/Col4a6/Cyp1b1/Col3a1	33	GO_BP	down
GO:0045229	external encapsulating structure organization	33/916	323/28891	4.20748e-09	3.55193e-07	2.28876e-07	Serpinh1/Ext1/Prdx4/Gpm6b/Col18a1/Crtap/Mmp2/Ccdc80/Fbln1/Aebp1/Ltbp4/Antxr1/Clasp2/Myo1e/Prdm5/Col4a5/Large1/Mmp28/Col8a2/Fbln5/Mkx/Adamts18/Mmp9/Flrt2/Tgfbi/Col17a1/Myh11/Cav1/Csgalnact1/Col5a2/Col4a6/Cyp1b1/Col3a1	33	GO_BP	down
GO:0045069	regulation of viral genome replication	17/916	92/28891	4.32367e-09	3.57544e-07	2.3039e-07	Ifitm2/Ifitm3/Stau1/Oasl2/Zc3hav1/Bst2/Eif2ak2/Isg15/Plscr2/Ifih1/Shfl/Isg20/Oas1a/Gbp3/Gbp7/Mx2/Rsad2	17	GO_BP	down
GO:1901652	response to peptide	41/916	464/28891	4.37195e-09	3.57544e-07	2.3039e-07	Prnp/Pik3r1/Rps6/Stat1/Marcks/Mbd5/Igf1r/Nck1/Dennd4c/Irf1/Ncoa2/Anxa1/Nfkbia/Stat3/Vcam1/Irs2/Mmp2/Prkdc/Gja1/Tgfbr3/Akt3/Rap1gds1/Ghr/Kat7/Egr1/Sik2/Stat2/Vps13c/Zfp36l1/Prkca/Serpina3i/Prkd1/Myo5a/Socs3/Mmp9/Nr4a1/Cav1/Serpinf1/Col3a1/Cacna2d1/Grb10	41	GO_BP	down
GO:0043062	extracellular structure organization	33/916	324/28891	4.54556e-09	3.66023e-07	2.35854e-07	Serpinh1/Ext1/Prdx4/Gpm6b/Col18a1/Crtap/Mmp2/Ccdc80/Fbln1/Aebp1/Ltbp4/Antxr1/Clasp2/Myo1e/Prdm5/Col4a5/Large1/Mmp28/Col8a2/Fbln5/Mkx/Adamts18/Mmp9/Flrt2/Tgfbi/Col17a1/Myh11/Cav1/Csgalnact1/Col5a2/Col4a6/Cyp1b1/Col3a1	33	GO_BP	down
GO:0030098	lymphocyte differentiation	42/916	486/28891	5.44298e-09	4.31645e-07	2.78139e-07	Pik3r1/Rps6/H2-DMa/Rora/Ambra1/H2-Ab1/Rc3h1/Runx1/Bcl6/Gli3/Lgals8/Slc46a2/Irf1/Anxa1/Stat3/Axl/Prkdc/Tmem131l/Fas/Lgals9/Fnip1/Atp11c/Cd1d1/Kat7/Atm/Nfkbiz/Egr1/Igtp/Zfp36l1/Relb/Zbtb16/Nfil3/B2m/H2-Oa/Irf8/Pnp/Hmgb3/Cdk6/Gadd45g/Dock10/Psmb11/Rsad2	42	GO_BP	down
GO:1901888	regulation of cell junction assembly	28/916	246/28891	5.92461e-09	4.62827e-07	2.98232e-07	Pik3r1/Rps6/Slk/Numb/Pdlim5/Efna5/Tjp1/Gpm6b/Vcl/Adgrl2/Stau2/Gja1/Arhgap6/Mycbp2/Clasp2/Ppp1r9a/Nrg1/Prkca/Robo1/Il1rap/Ntrk3/Flrt2/Cav1/Nrp1/Slit2/Nlgn1/Lingo2/Negr1	28	GO_BP	down
GO:0010631	epithelial cell migration	33/916	328/28891	6.17087e-09	4.74975e-07	3.0606e-07	Plpp3/Grn/Kitl/Lgals8/Prkce/Sp100/Krit1/Jun/Anxa1/Col18a1/Irs2/Rin2/Tgfbr3/Akt3/Map2k3/Clasp2/Klf4/Apoe/Sema3a/Prkca/Robo1/Angpt1/Prkd1/P2rx4/Lcn2/Mmp9/Nr4a1/Nrp1/Serpinf1/Pecam1/Slit2/Cyp1b1/Vegfc	33	GO_BP	down
GO:0022612	gland morphogenesis	22/916	158/28891	6.30546e-09	4.78301e-07	3.08203e-07	Btbd7/Gli3/Igf1r/Csf1/Slc12a2/Mmp2/Smo/Msn/Tnc/Pgr/Eda/Hgf/Sema3a/Esr1/Robo1/Ar/Gli2/Ptn/Cav1/Nrp1/Slit2/Csmd1	22	GO_BP	down
GO:0048732	gland development	42/916	489/28891	6.51298e-09	4.86984e-07	3.13798e-07	Ash1l/Ext1/Btbd7/Zfas1/Runx1/Gli3/Edaradd/Igf1r/Slc46a2/Csf1/Jun/Slc12a2/Anxa1/Gak/Irs2/Mmp2/Prkdc/Gja1/Tgfbr3/Smo/Msn/Tnc/Hipk2/Pgr/Xdh/Eda/Atm/Hgf/Sema3a/Esr1/Msx1/Robo1/Ar/Ascl1/Gli2/Zfp703/Ptn/Cav1/Nrp1/Serpinf1/Slit2/Csmd1	42	GO_BP	down
GO:0090132	epithelium migration	33/916	330/28891	7.17525e-09	5.28947e-07	3.40837e-07	Plpp3/Grn/Kitl/Lgals8/Prkce/Sp100/Krit1/Jun/Anxa1/Col18a1/Irs2/Rin2/Tgfbr3/Akt3/Map2k3/Clasp2/Klf4/Apoe/Sema3a/Prkca/Robo1/Angpt1/Prkd1/P2rx4/Lcn2/Mmp9/Nr4a1/Nrp1/Serpinf1/Pecam1/Slit2/Cyp1b1/Vegfc	33	GO_BP	down
GO:0051090	regulation of DNA-binding transcription factor activity	39/916	436/28891	7.43402e-09	5.40412e-07	3.48225e-07	Prnp/Plpp3/Igf1r/Ddrgk1/Hdac4/Sp100/Trim12a/Nfkbia/Stat3/Fzd2/Sik1/Eif2ak2/Tgfbr3/Carm1/Ripk1/Flot2/Smo/Hipk2/Eda/Trim25/Parp10/Trim5/Trim12c/Klf4/Rigi/Esr1/Il1rap/Ifrd1/Ar/Prkd1/Bhlhe40/Nlrc5/Cav1/Sox6/Lrrk2/Trim30a/Trim30d/Cyp1b1/Epha5	39	GO_BP	down
GO:0034340	response to type I interferon	15/916	73/28891	7.68002e-09	5.45425e-07	3.51455e-07	Ifitm2/Stat1/Ifitm3/Hdac4/Sp100/Isg15/Ifih1/Stat2/Shfl/Samhd1/Zbp1/Oas1a/Irf7/Nlrc5/Mx2	15	GO_BP	down
GO:0140888	interferon-mediated signaling pathway	16/916	84/28891	7.78249e-09	5.45425e-07	3.51455e-07	Ifitm2/Stat1/Ifitm3/Hdac4/Irf1/Irgm1/Isg15/Parp14/Ifih1/Igtp/Stat2/Samhd1/Zbp1/Oas1a/Irf7/Nlrc5	16	GO_BP	down
GO:0019883	antigen processing and presentation of endogenous antigen	13/916	53/28891	7.81944e-09	5.45425e-07	3.51455e-07	Tap2/H2-D1/H2-M3/H2-K1/Cd1d1/H2-T22/Tap1/B2m/H2-Q4/H2-Q2/H2-Q7/H2-Q6/H2-M2	13	GO_BP	down
GO:0032496	response to lipopolysaccharide	37/916	401/28891	7.91981e-09	5.45425e-07	3.51455e-07	Hnrnpa0/Stat1/Pde4b/Prpf8/Prkce/Slc12a2/Cxcl16/Trim12a/Nfkbia/Abca1/Eif2ak2/Axl/S100a14/Zfp36/Rps6ka3/Irgm1/Pde4d/Lgals9/Adm/Plscr2/Map2k3/Nfkbiz/Trim5/Trim12c/Igtp/Gbp6/Mgst1/Prkca/Gbp2/B2m/Irf8/Gbp3/Nr4a1/Trim30a/Gbp5/Trim30d/Cfh	37	GO_BP	down
GO:0090130	tissue migration	33/916	332/28891	8.33192e-09	5.66354e-07	3.64941e-07	Plpp3/Grn/Kitl/Lgals8/Prkce/Sp100/Krit1/Jun/Anxa1/Col18a1/Irs2/Rin2/Tgfbr3/Akt3/Map2k3/Clasp2/Klf4/Apoe/Sema3a/Prkca/Robo1/Angpt1/Prkd1/P2rx4/Lcn2/Mmp9/Nr4a1/Nrp1/Serpinf1/Pecam1/Slit2/Cyp1b1/Vegfc	33	GO_BP	down
GO:0040013	negative regulation of locomotion	34/916	358/28891	1.56129e-08	1.04393e-06	6.72677e-07	Sp100/Krit1/Ldlrad4/Stat3/Bst2/Tgfbr3/Fbln1/Sap130/Fas/Dusp1/Nav3/Clasp2/Ing2/Nrg1/Adgrg1/Klf4/Ccl25/Apoe/Mmp28/Dpysl3/Sema3a/Magi2/Robo1/Ptprk/Tet1/Ptn/Cav1/Nrp1/Serpinf1/Slit2/Cyp1b1/Col3a1/Sema3e/Tmeff2	34	GO_BP	down
GO:0019079	viral genome replication	19/916	125/28891	1.57567e-08	1.04393e-06	6.72677e-07	Ifitm2/Pcbp2/Ifitm3/Stau1/Oasl2/Zc3hav1/Bst2/Eif2ak2/Fmr1/Isg15/Plscr2/Ifih1/Shfl/Isg20/Oas1a/Gbp3/Gbp7/Mx2/Rsad2	19	GO_BP	down
GO:2000146	negative regulation of cell motility	32/916	326/28891	1.88687e-08	1.23449e-06	7.95466e-07	Sp100/Krit1/Ldlrad4/Stat3/Bst2/Tgfbr3/Fbln1/Sap130/Fas/Dusp1/Nav3/Clasp2/Ing2/Nrg1/Adgrg1/Klf4/Ccl25/Apoe/Mmp28/Dpysl3/Sema3a/Magi2/Robo1/Ptprk/Tet1/Ptn/Cav1/Serpinf1/Slit2/Cyp1b1/Col3a1/Tmeff2	32	GO_BP	down
GO:0002399	MHC class II protein complex assembly	7/916	12/28891	2.16974e-08	1.36734e-06	8.81071e-07	H2-DMa/H2-Ab1/H2-Eb1/B2m/H2-Oa/H2-Eb2/H2-DMb2	7	GO_BP	down
GO:0002503	peptide antigen assembly with MHC class II protein complex	7/916	12/28891	2.16974e-08	1.36734e-06	8.81071e-07	H2-DMa/H2-Ab1/H2-Eb1/B2m/H2-Oa/H2-Eb2/H2-DMb2	7	GO_BP	down
GO:0050680	negative regulation of epithelial cell proliferation	22/916	169/28891	2.21427e-08	1.36734e-06	8.81071e-07	Stat1/Zfas1/Klf9/Suz12/Krit1/Gja1/Tgfbr3/Smo/Xdh/Ift74/Ift57/Apoe/Robo1/Gpc3/Ptprk/B2m/Ar/Cdk6/Ptn/Cav1/Serpinf1/Dab2	22	GO_BP	down
GO:0032606	type I interferon production	20/916	141/28891	2.22055e-08	1.36734e-06	8.81071e-07	Irf9/Stat1/Zbtb20/Irf1/Rel/Zc3hav1/Nmi/Irgm1/Isg15/Dhx58/Ifih1/Xaf1/Igtp/Relb/Rigi/Irf8/Oas1a/Irf7/Gbp3/Gbp7	20	GO_BP	down
GO:0062207	regulation of pattern recognition receptor signaling pathway	20/916	141/28891	2.22055e-08	1.36734e-06	8.81071e-07	Pik3r1/Stmp1/Ifi35/Ankrd17/Slc46a2/Irf1/Zc3hav1/Eif2ak2/Irgm1/Dhx58/Igtp/Esr1/Gbp2/Ddx60/Prkd1/Irf7/Cav1/Trim30a/Gbp5/Rsad2	20	GO_BP	down
GO:0019885	antigen processing and presentation of endogenous peptide antigen via MHC class I	12/916	48/28891	2.33898e-08	1.42351e-06	9.17269e-07	Tap2/H2-D1/H2-M3/H2-K1/H2-T22/Tap1/B2m/H2-Q4/H2-Q2/H2-Q7/H2-Q6/H2-M2	12	GO_BP	down
GO:0043254	regulation of protein-containing complex assembly	38/916	437/28891	2.46352e-08	1.46819e-06	9.46057e-07	Rack1/Stmp1/Ambra1/Birc2/Tmsb10/Nck1/Prkce/Stxbp5/Abca1/Eif2ak2/Terf1/Irgm1/Msn/Aida/Fas/Fchsd2/Isg15/Fnip1/Xaf1/Nav3/Atm/Clasp2/Ppp1r9a/Igtp/Nrg1/Apoe/Stxbp6/Spidr/Plekhg2/Gbp2/Prkd1/Arhgap18/Pak3/Cav1/Pecam1/Slit2/Trim30a/Gbp5	38	GO_BP	down
GO:0002698	negative regulation of immune effector process	22/916	170/28891	2.46849e-08	1.46819e-06	9.46057e-07	Rps19/Grn/Rc3h1/Bcl6/Irf1/Tap2/Anxa1/H2-D1/Bst2/Axl/Prkdc/Lgals9/H2-K1/H2-T22/Tap1/H2-Q4/Angpt1/H2-Q2/H2-Q7/H2-Q6/Serping1/H2-M2	22	GO_BP	down
GO:0060759	regulation of response to cytokine stimulus	21/916	156/28891	2.54249e-08	1.48397e-06	9.56227e-07	Il6st/Csf1/Axl/Ripk1/Irgm1/Isg15/Parp14/Ifih1/Igtp/Klf4/Stat2/Samhd1/Rigi/Robo1/Zbp1/Angpt1/Oas1a/Irf7/Nlrc5/Cav1/Slit2	21	GO_BP	down
GO:0030336	negative regulation of cell migration	31/916	313/28891	2.55173e-08	1.48397e-06	9.56227e-07	Sp100/Krit1/Ldlrad4/Stat3/Bst2/Tgfbr3/Sap130/Fas/Dusp1/Nav3/Clasp2/Ing2/Nrg1/Adgrg1/Klf4/Ccl25/Apoe/Mmp28/Dpysl3/Sema3a/Magi2/Robo1/Ptprk/Tet1/Ptn/Cav1/Serpinf1/Slit2/Cyp1b1/Col3a1/Tmeff2	31	GO_BP	down
GO:0018105	peptidyl-serine phosphorylation	32/916	331/28891	2.70742e-08	1.55721e-06	1.00342e-06	Rack1/Hipk3/Mast4/Dock7/Cnksr3/Mknk2/Nck1/Prkce/Pdk3/Prkdc/Ripk1/Rps6ka3/Irgm1/Pde4d/Hipk2/Akt3/Fnip1/Atm/Mast2/Igtp/Hgf/Ppp1r15a/Prkca/Caprin2/Angpt1/Prkd1/Camk4/Ntrk3/Stox1/Cav1/Sgk3/Lrrk2	32	GO_BP	down
GO:0071560	cellular response to transforming growth factor beta stimulus	27/916	248/28891	2.84205e-08	1.61688e-06	1.04187e-06	Tnrc6c/Runx1/Igf1r/Zfyve9/Chst11/Jun/Ldlrad4/Stat3/Tgfbr3/Sap130/Hipk2/Lgals9/Wwox/Ltbp4/Nfkbiz/Ing2/Fos/Zfp36l1/Ptprk/Wfikkn2/Tet1/Htra1/Zfp703/Cav1/Sox6/Dab2/Col3a1	27	GO_BP	down
GO:0016055	Wnt signaling pathway	39/916	460/28891	3.20091e-08	1.80146e-06	1.1608e-06	Rps12/Ext1/Cdh3/Plpp3/Mbd2/Ctnnd2/Sdc1/Gli3/Tle4/Mllt3/Ppp2r3a/Wwtr1/Myc/Yap1/Fzd2/Tmem131l/Ubr5/Ttc21b/Daam1/Wwox/Lrrk1/Eda/Egr1/Klf4/Apoe/Cpe/Bicc1/Caprin2/Gpc3/Rnf213/Grk5/Zfp703/Cdk14/Cav1/Dab2/Lrrk2/Grb10/Gpc5/Ppm1n	39	GO_BP	down
GO:0035455	response to interferon-alpha	10/916	32/28891	3.3454e-08	1.85411e-06	1.19473e-06	Ifitm2/Ifitm3/Myc/Bst2/Eif2ak2/Axl/Tgtp1/Oas1a/Ifit1/Ifi204	10	GO_BP	down
GO:0010632	regulation of epithelial cell migration	27/916	250/28891	3.36532e-08	1.85411e-06	1.19473e-06	Plpp3/Grn/Prkce/Sp100/Krit1/Jun/Anxa1/Col18a1/Irs2/Rin2/Tgfbr3/Akt3/Map2k3/Clasp2/Klf4/Apoe/Sema3a/Prkca/Angpt1/Prkd1/P2rx4/Lcn2/Mmp9/Nrp1/Serpinf1/Slit2/Vegfc	27	GO_BP	down
GO:0198738	cell-cell signaling by wnt	39/916	462/28891	3.59555e-08	1.96032e-06	1.26317e-06	Rps12/Ext1/Cdh3/Plpp3/Mbd2/Ctnnd2/Sdc1/Gli3/Tle4/Mllt3/Ppp2r3a/Wwtr1/Myc/Yap1/Fzd2/Tmem131l/Ubr5/Ttc21b/Daam1/Wwox/Lrrk1/Eda/Egr1/Klf4/Apoe/Cpe/Bicc1/Caprin2/Gpc3/Rnf213/Grk5/Zfp703/Cdk14/Cav1/Dab2/Lrrk2/Grb10/Gpc5/Ppm1n	39	GO_BP	down
GO:0050679	positive regulation of epithelial cell proliferation	26/916	235/28891	3.68276e-08	1.98717e-06	1.28047e-06	Eya1/Cdh3/Grn/Itgb3bp/Myc/Ang/Jun/Yap1/Col18a1/Vegfb/Stat3/Irs2/Smo/Cxadr/Akt3/Esr1/Prkca/Htra1/Ar/Prkd1/Gli2/Zfp703/Nr4a1/Ptn/Cav1/Vegfc	26	GO_BP	down
GO:0032943	mononuclear cell proliferation	35/916	389/28891	3.76725e-08	2.01202e-06	1.29648e-06	Prnp/Rps6/Rc3h1/Bcl6/Kitl/Il6st/Nck1/Myc/Psmb10/Csf1/Irf1/Anxa1/H2-D1/Vcam1/Irs2/Gja1/Tmem131l/Cblb/Irgm1/Msn/Lgals9/H2-K1/Cd1d1/Atm/Nfkbiz/H2-T22/Impdh2/H2-Q4/Pnp/H2-Q2/H2-Q7/H2-DMb2/Slfn2/H2-Q6/H2-M2	35	GO_BP	down
GO:0002475	antigen processing and presentation via MHC class Ib	12/916	50/28891	3.84493e-08	2.01244e-06	1.29675e-06	Tap2/H2-D1/H2-M3/H2-K1/Cd1d1/H2-T22/B2m/H2-Q4/H2-Q2/H2-Q7/H2-Q6/H2-M2	12	GO_BP	down
GO:0002483	antigen processing and presentation of endogenous peptide antigen	12/916	50/28891	3.84493e-08	2.01244e-06	1.29675e-06	Tap2/H2-D1/H2-M3/H2-K1/H2-T22/Tap1/B2m/H2-Q4/H2-Q2/H2-Q7/H2-Q6/H2-M2	12	GO_BP	down
GO:0071559	response to transforming growth factor beta	27/916	252/28891	3.97726e-08	2.06109e-06	1.3281e-06	Tnrc6c/Runx1/Igf1r/Zfyve9/Chst11/Jun/Ldlrad4/Stat3/Tgfbr3/Sap130/Hipk2/Lgals9/Wwox/Ltbp4/Nfkbiz/Ing2/Fos/Zfp36l1/Ptprk/Wfikkn2/Tet1/Htra1/Zfp703/Cav1/Sox6/Dab2/Col3a1	27	GO_BP	down
GO:0051091	positive regulation of DNA-binding transcription factor activity	28/916	269/28891	4.17612e-08	2.12258e-06	1.36773e-06	Plpp3/Ddrgk1/Hdac4/Sp100/Trim12a/Stat3/Fzd2/Eif2ak2/Tgfbr3/Carm1/Ripk1/Flot2/Smo/Hipk2/Eda/Trim25/Trim5/Trim12c/Rigi/Esr1/Il1rap/Ifrd1/Ar/Prkd1/Cav1/Trim30a/Trim30d/Epha5	28	GO_BP	down
GO:0044270	cellular nitrogen compound catabolic process	38/916	446/28891	4.21758e-08	2.12258e-06	1.36773e-06	Hint1/Pabpc1/Tnrc6c/Slirp/Hnrnpa0/Lsm5/Smg6/Zcchc7/Acat1/Rc3h1/Qki/Nt5c/Pnrc1/Ang/Mettl16/Ago1/Rnaset2b/Zc3hav1/Nudt13/Zfp36/Nbas/Casc3/Fmr1/Xdh/Naf1/Blvrb/Atm/Slfn8/Dpyd/Zfp36l1/Samhd1/Isg20/Slfn9/Tet1/Tent5a/Pnp/Igf2bp2/Slfn2	38	GO_BP	down
GO:0046700	heterocycle catabolic process	38/916	446/28891	4.21758e-08	2.12258e-06	1.36773e-06	Hint1/Pabpc1/Tnrc6c/Slirp/Hnrnpa0/Lsm5/Smg6/Zcchc7/Acat1/Rc3h1/Qki/Nt5c/Pnrc1/Ang/Mettl16/Ago1/Rnaset2b/Zc3hav1/Nudt13/Zfp36/Nbas/Casc3/Fmr1/Xdh/Naf1/Blvrb/Atm/Slfn8/Dpyd/Zfp36l1/Samhd1/Isg20/Slfn9/Tet1/Tent5a/Pnp/Igf2bp2/Slfn2	38	GO_BP	down
GO:0051962	positive regulation of nervous system development	35/916	391/28891	4.27967e-08	2.13331e-06	1.37464e-06	Pik3r1/Marcks/Tspo/Numb/Foxg1/Qki/Gli3/Efna5/Il6st/Myc/Adgrl2/Stau2/Shtn1/Smo/Fmr1/Plxna2/Nrg1/Apoe/Prkca/Caprin2/Robo1/Il1rap/Trp73/Ascl1/Grip1/Pak3/Ntrk3/Ptn/Flrt2/Nrp1/Serpinf1/Slit2/Nlgn1/Lingo2/Vegfc	35	GO_BP	down
GO:0019439	aromatic compound catabolic process	39/916	467/28891	4.7917e-08	2.36601e-06	1.52459e-06	Hint1/Pabpc1/Tnrc6c/Slirp/Hnrnpa0/Lsm5/Smg6/Zcchc7/Acat1/Rc3h1/Qki/Nt5c/Pnrc1/Ang/Mettl16/Ago1/Rnaset2b/Zc3hav1/Nudt13/Zfp36/Nbas/Casc3/Fmr1/Xdh/Naf1/Blvrb/Atm/Slfn8/Dpyd/Zfp36l1/Samhd1/Isg20/Slfn9/Tet1/Tent5a/Pnp/Igf2bp2/Maoa/Slfn2	39	GO_BP	down
GO:0060070	canonical Wnt signaling pathway	30/916	305/28891	4.98507e-08	2.42317e-06	1.56142e-06	Rps12/Ext1/Cdh3/Ctnnd2/Sdc1/Gli3/Tle4/Mllt3/Ppp2r3a/Wwtr1/Yap1/Fzd2/Tmem131l/Ubr5/Ttc21b/Lrrk1/Eda/Egr1/Klf4/Apoe/Bicc1/Caprin2/Gpc3/Zfp703/Cdk14/Cav1/Dab2/Lrrk2/Gpc5/Ppm1n	30	GO_BP	down
GO:0060996	dendritic spine development	19/916	134/28891	5.00005e-08	2.42317e-06	1.56142e-06	Grn/Dtnbp1/Marcks/Ctnnd2/Pdlim5/Tanc2/Lpar1/Stau2/Uba6/Fmr1/Ppp1r9a/Apoe/Caprin2/Pak3/Lrrk2/Dock10/Nlgn1/Sdk1/Epha5	19	GO_BP	down
GO:0097061	dendritic spine organization	17/916	108/28891	5.25665e-08	2.50221e-06	1.61235e-06	Prnp/Dtnbp1/Marcks/Ctnnd2/Pdlim5/Igf1r/Tanc2/Stau2/Ppp1r9a/Apoe/Homer1/Caprin2/Pak3/Lrrk2/Dock10/Nlgn1/Epha5	17	GO_BP	down
GO:0030111	regulation of Wnt signaling pathway	31/916	323/28891	5.25875e-08	2.50221e-06	1.61235e-06	Rps12/Cdh3/Plpp3/Mbd2/Ctnnd2/Gli3/Tle4/Mllt3/Ppp2r3a/Wwtr1/Yap1/Tmem131l/Ubr5/Ttc21b/Wwox/Lrrk1/Eda/Egr1/Apoe/Bicc1/Caprin2/Gpc3/Rnf213/Zfp703/Cdk14/Cav1/Dab2/Lrrk2/Grb10/Gpc5/Ppm1n	31	GO_BP	down
GO:0034655	nucleobase-containing compound catabolic process	36/916	414/28891	5.73193e-08	2.70278e-06	1.74159e-06	Hint1/Pabpc1/Tnrc6c/Slirp/Hnrnpa0/Lsm5/Smg6/Zcchc7/Acat1/Rc3h1/Qki/Nt5c/Pnrc1/Ang/Mettl16/Ago1/Rnaset2b/Zc3hav1/Nudt13/Zfp36/Nbas/Casc3/Fmr1/Xdh/Naf1/Atm/Slfn8/Dpyd/Zfp36l1/Samhd1/Isg20/Slfn9/Tent5a/Pnp/Igf2bp2/Slfn2	36	GO_BP	down
GO:0001916	positive regulation of T cell mediated cytotoxicity	13/916	62/28891	5.93205e-08	2.77217e-06	1.7863e-06	Tap2/H2-D1/H2-M3/H2-K1/Cd1d1/H2-T22/B2m/H2-Q4/Pnp/H2-Q2/H2-Q7/H2-Q6/H2-M2	13	GO_BP	down
GO:0071346	cellular response to type II interferon	18/916	122/28891	6.00544e-08	2.78164e-06	1.7924e-06	Stat1/H2-Ab1/Slk/Irf1/Irgm1/Parp14/Igtp/Gbp6/Ccl25/Myo18a/Gbp2/Irf8/Gbp8/H2-Q7/Gbp3/Nlrc5/Gbp7/Gbp5	18	GO_BP	down
GO:0018209	peptidyl-serine modification	32/916	343/28891	6.23533e-08	2.86278e-06	1.84469e-06	Rack1/Hipk3/Mast4/Dock7/Cnksr3/Mknk2/Nck1/Prkce/Pdk3/Prkdc/Ripk1/Rps6ka3/Irgm1/Pde4d/Hipk2/Akt3/Fnip1/Atm/Mast2/Igtp/Hgf/Ppp1r15a/Prkca/Caprin2/Angpt1/Prkd1/Camk4/Ntrk3/Stox1/Cav1/Sgk3/Lrrk2	32	GO_BP	down
GO:1901361	organic cyclic compound catabolic process	40/916	491/28891	6.31794e-08	2.87549e-06	1.85288e-06	Hint1/Pabpc1/Tnrc6c/Slirp/Hnrnpa0/Lsm5/Smg6/Zcchc7/Acat1/Rc3h1/Qki/Nt5c/Pnrc1/Ang/Mettl16/Ago1/Rnaset2b/Zc3hav1/Nudt13/Zfp36/Nbas/Casc3/Fmr1/Xdh/Naf1/Blvrb/Atm/Slfn8/Apoe/Dpyd/Zfp36l1/Samhd1/Isg20/Slfn9/Tet1/Tent5a/Pnp/Igf2bp2/Maoa/Slfn2	40	GO_BP	down
GO:0032479	regulation of type I interferon production	19/916	136/28891	6.37318e-08	2.87562e-06	1.85296e-06	Stat1/Zbtb20/Irf1/Rel/Zc3hav1/Nmi/Irgm1/Isg15/Dhx58/Ifih1/Xaf1/Igtp/Relb/Rigi/Irf8/Oas1a/Irf7/Gbp3/Gbp7	19	GO_BP	down
GO:0043523	regulation of neuron apoptotic process	30/916	310/28891	7.15965e-08	3.19265e-06	2.05725e-06	Prnp/Oxr1/Ambra1/Grn/Itga1/Il6st/Hdac4/Jun/Bok/Vegfb/Axl/Ripk1/Smo/Fas/Fmr1/Hipk2/Mt1/Atm/Egr1/Apoe/Esr1/Angpt1/Trp73/Ascl1/Pak3/Lcn2/Nrp1/Sema3e/Chl1/Egln3	30	GO_BP	down
GO:1902105	regulation of leukocyte differentiation	33/916	363/28891	7.20311e-08	3.19265e-06	2.05725e-06	Pik3r1/H2-DMa/Ambra1/Rc3h1/Runx1/Bcl6/Gli3/Kitl/Slc46a2/Myc/Csf1/Irf1/Jun/Anxa1/Axl/Prkdc/Tmem131l/Ripk1/Fas/Lgals9/Atp11c/Cd1d1/Nfkbiz/Fos/Zfp36l1/Prkca/Zbtb16/H2-Oa/Klf10/Pnp/Hmgb3/Cdk6/Lrrc17	33	GO_BP	down
GO:0031102	neuron projection regeneration	13/916	63/28891	7.25879e-08	3.19265e-06	2.05725e-06	Grn/Igf1r/Jun/Mmp2/Fas/Tnc/Adm/Nrg1/Klf4/Hgf/Neo1/Ntrk3/Ptn	13	GO_BP	down
GO:0052547	regulation of peptidase activity	38/916	457/28891	7.95331e-08	3.45111e-06	2.22379e-06	Rack1/Serpinh1/Stat1/Grn/Cstb/Serpinb6a/Timp2/Psme1/Psmb9/Ddrgk1/Myc/Bok/Stat3/Renbp/Rps6ka3/Fas/Xdh/Fnip1/Antxr1/Ift57/Klf4/Hgf/Robo1/Serpina3i/Gpc3/Wfikkn2/Rcn3/Simc1/Psmb8/Mgmt/Serpinb1a/Mmp9/Hip1/Nr4a1/Cav1/Serpinf1/Serpinb10/Serping1	38	GO_BP	down
GO:0048872	homeostasis of number of cells	35/916	401/28891	7.9783e-08	3.45111e-06	2.22379e-06	Rps6/Ext1/Stat1/Rps19/Pde4b/Rc3h1/Bcl6/Kitl/Slc46a2/Csf1/Anxa1/Stat3/Axl/Prkdc/Tgfbr3/Zfp36/Cdin1/Nbea/Smo/Fas/Isg15/Akt3/Klf2/Tsc22d3/Kat7/Nfkbiz/Adgrg1/Zfp36l1/Armcx1/B2m/Cdk6/Flvcr1/Sox6/Dock10/Cfh	35	GO_BP	down
GO:0046651	lymphocyte proliferation	34/916	383/28891	8.13575e-08	3.49037e-06	2.24909e-06	Prnp/Rps6/Rc3h1/Bcl6/Kitl/Il6st/Nck1/Myc/Psmb10/Irf1/Anxa1/H2-D1/Vcam1/Irs2/Gja1/Tmem131l/Cblb/Irgm1/Msn/Lgals9/H2-K1/Cd1d1/Atm/Nfkbiz/H2-T22/Impdh2/H2-Q4/Pnp/H2-Q2/H2-Q7/H2-DMb2/Slfn2/H2-Q6/H2-M2	34	GO_BP	down
GO:0032970	regulation of actin filament-based process	35/916	402/28891	8.47977e-08	3.60838e-06	2.32513e-06	Pik3r1/Pde4b/Tmsb10/Efna5/Tjp1/Nck1/Prkce/Frmd6/Gpm6b/Lpar1/Bst2/Stau2/Gja1/Pde4d/Washc4/Fchsd2/Alms1/Rhpn2/Arhgap6/Clasp2/Ppp1r9a/Ccdc88a/Plekhg2/Cgnl1/Pdlim4/Prkd1/Arhgap18/Pak3/Pam/Cav1/Nrp1/Pecam1/Slit2/Epha5/Tmeff2	35	GO_BP	down
GO:0061138	morphogenesis of a branching epithelium	25/916	229/28891	8.71714e-08	3.67948e-06	2.37094e-06	Eya1/Ext1/Btbd7/Gli3/Myc/Csf1/Slc12a2/Yap1/Smo/Tnc/Pgr/Adm/Hgf/Sema3a/Esr1/Hs3st3a1/Gpc3/Angpt1/Ar/Socs3/Gli2/Nrp1/Slit2/Csmd1/Sema3e	25	GO_BP	down
GO:0002757	immune response-activating signaling pathway	37/916	440/28891	8.85762e-08	3.70886e-06	2.38988e-06	Prnp/Pik3r1/Stmp1/Ifi35/Pde4b/Ankrd17/Rc3h1/Slc46a2/Prkce/Irf1/Nfkbia/Zc3hav1/Eif2ak2/S100a14/Cblb/Rps6ka3/Nmi/Irgm1/Pde4d/Dhx58/Plscr2/Trim25/Ifih1/Nfkbiz/Alpk1/Igtp/Rigi/Esr1/Gbp2/Ddx60/Oas1a/Prkd1/Irf7/Cav1/Trim30a/Gbp5/Rsad2	37	GO_BP	down
GO:0001818	negative regulation of cytokine production	30/916	314/28891	9.50551e-08	3.94856e-06	2.54433e-06	Prnp/Cdh3/Tspo/Bcl6/Suz12/Laptm4b/Rel/Anxa1/Bst2/Axl/Fbln1/Zfp36/Ubr5/Nmi/Irgm1/Lgals9/Dhx58/Klf2/Xaf1/Nav3/Igtp/Klf4/Hgf/Relb/Angpt1/Oas1a/Serpinb1a/Gbp3/Gbp7/Trim30a	30	GO_BP	down
GO:0033002	muscle cell proliferation	28/916	280/28891	9.77943e-08	4.03036e-06	2.59704e-06	Pik3r1/Igf1r/Hdac4/Myc/Ang/Jun/Yap1/Stat3/Mmp2/Prkdc/Gja1/Tgfbr3/Pde4d/Cxadr/Myh10/Egr1/Nrg1/Klf4/Hgf/Apoe/Esr1/Prkca/Angpt1/Kcnk2/Trp73/Mmp9/Cav1/Ogn	28	GO_BP	down
GO:0043542	endothelial cell migration	25/916	231/28891	1.0329e-07	4.2236e-06	2.72156e-06	Plpp3/Grn/Lgals8/Sp100/Krit1/Anxa1/Col18a1/Rin2/Akt3/Map2k3/Klf4/Apoe/Prkca/Robo1/Angpt1/Prkd1/P2rx4/Lcn2/Nr4a1/Nrp1/Serpinf1/Pecam1/Slit2/Cyp1b1/Vegfc	25	GO_BP	down
GO:0006935	chemotaxis	38/916	462/28891	1.05269e-07	4.27115e-06	2.7522e-06	Rps19/Pde4b/Itga1/Mpp1/Csf1/Slc12a2/Cxcl16/Anxa1/Vegfb/Lpar1/Vcam1/Mmp2/S100a14/Pde4d/Lgals9/Cxadr/Mcu/Dusp1/Mycbp2/Nrg1/Ccl25/Hgf/Mmp28/Sema3a/Prkca/Robo1/Angpt1/Prkd1/P2rx4/Unc5c/Mmp9/Ntrk3/Nr4a1/Ptn/Nrp1/Slit2/Sema3e/Vegfc	38	GO_BP	down
GO:0070661	leukocyte proliferation	36/916	425/28891	1.10265e-07	4.43945e-06	2.86065e-06	Prnp/Rps6/Rc3h1/Bcl6/Kitl/Il6st/Nck1/Myc/Psmb10/Csf1/Irf1/Anxa1/H2-D1/Junb/Vcam1/Irs2/Gja1/Tmem131l/Cblb/Irgm1/Msn/Lgals9/H2-K1/Cd1d1/Atm/Nfkbiz/H2-T22/Impdh2/H2-Q4/Pnp/H2-Q2/H2-Q7/H2-DMb2/Slfn2/H2-Q6/H2-M2	36	GO_BP	down
GO:0048511	rhythmic process	30/916	317/28891	1.17154e-07	4.66307e-06	3.00474e-06	Rack1/Rora/Scaper/Klf9/Runx1/Igf1r/Phlpp1/Ncoa2/Anxa1/Pspc1/Sik1/Axl/Prkdc/Fas/Pde4d/Pgr/Npas2/Mycbp2/Egr1/Impdh2/Dpyd/Cavin3/Relb/Esr1/Nfil3/Klf10/Bhlhe40/Ntrk3/Ptn/Nlgn1	30	GO_BP	down
GO:0042330	taxis	38/916	464/28891	1.17601e-07	4.66307e-06	3.00474e-06	Rps19/Pde4b/Itga1/Mpp1/Csf1/Slc12a2/Cxcl16/Anxa1/Vegfb/Lpar1/Vcam1/Mmp2/S100a14/Pde4d/Lgals9/Cxadr/Mcu/Dusp1/Mycbp2/Nrg1/Ccl25/Hgf/Mmp28/Sema3a/Prkca/Robo1/Angpt1/Prkd1/P2rx4/Unc5c/Mmp9/Ntrk3/Nr4a1/Ptn/Nrp1/Slit2/Sema3e/Vegfc	38	GO_BP	down
GO:0001503	ossification	39/916	484/28891	1.22753e-07	4.83076e-06	3.1128e-06	Rpl38/Ext1/Runx1/Gli3/Il6st/Wwtr1/Hdac4/Csf1/Yap1/Gpm6b/Junb/Mmp2/Hdac8/Gja1/Tgfbr3/Smo/Cebpd/Wwox/Isg15/Txlng/Map2k6/Zbtb16/Gpc3/Klf10/Tent5a/Ucma/Prkd1/Mkx/Gfra4/Gli2/Cdk6/Slc8a1/Ptn/Csgalnact1/Rsad2/Ifi204/Clec11a/Vegfc/Lrrc17	39	GO_BP	down
GO:0060828	regulation of canonical Wnt signaling pathway	26/916	251/28891	1.38885e-07	5.4248e-06	3.49558e-06	Rps12/Cdh3/Ctnnd2/Gli3/Tle4/Mllt3/Ppp2r3a/Wwtr1/Yap1/Tmem131l/Ubr5/Ttc21b/Lrrk1/Eda/Egr1/Apoe/Bicc1/Caprin2/Gpc3/Zfp703/Cdk14/Cav1/Dab2/Lrrk2/Gpc5/Ppm1n	26	GO_BP	down
GO:0050727	regulation of inflammatory response	35/916	411/28891	1.45243e-07	5.63113e-06	3.62853e-06	Ash1l/Rora/Rps19/Grn/Ifi35/Bcl6/Anxa1/H2-D1/Nfkbia/Stat3/Zfp36/Ripk1/Nmi/Irgm1/Tnc/Lgals9/H2-K1/Atm/Nfkbiz/H2-T22/Igtp/Hgf/Apoe/Esr1/Prkca/Ldlr/Zbp1/H2-Q4/H2-Q2/Socs3/H2-Q7/H2-Q6/Lrrk2/C3/H2-M2	35	GO_BP	down
GO:0002428	antigen processing and presentation of peptide antigen via MHC class Ib	11/916	46/28891	1.48142e-07	5.70127e-06	3.67373e-06	Tap2/H2-D1/H2-M3/H2-K1/H2-T22/B2m/H2-Q4/H2-Q2/H2-Q7/H2-Q6/H2-M2	11	GO_BP	down
GO:0002764	immune response-regulating signaling pathway	37/916	450/28891	1.55945e-07	5.89025e-06	3.7955e-06	Prnp/Pik3r1/Stmp1/Ifi35/Pde4b/Ankrd17/Rc3h1/Slc46a2/Prkce/Irf1/Nfkbia/Zc3hav1/Eif2ak2/S100a14/Cblb/Rps6ka3/Nmi/Irgm1/Pde4d/Dhx58/Plscr2/Trim25/Ifih1/Nfkbiz/Alpk1/Igtp/Rigi/Esr1/Gbp2/Ddx60/Oas1a/Prkd1/Irf7/Cav1/Trim30a/Gbp5/Rsad2	37	GO_BP	down
GO:0030217	T cell differentiation	31/916	339/28891	1.5638e-07	5.89025e-06	3.7955e-06	Rps6/H2-DMa/Rora/Ambra1/Rc3h1/Runx1/Bcl6/Gli3/Slc46a2/Irf1/Anxa1/Stat3/Prkdc/Tmem131l/Fas/Lgals9/Cd1d1/Kat7/Nfkbiz/Egr1/Igtp/Zfp36l1/Relb/Zbtb16/B2m/H2-Oa/Pnp/Cdk6/Gadd45g/Psmb11/Rsad2	31	GO_BP	down
GO:0042270	protection from natural killer cell mediated cytotoxicity	10/916	37/28891	1.56428e-07	5.89025e-06	3.7955e-06	Tap2/H2-D1/H2-K1/H2-T22/Tap1/H2-Q4/H2-Q2/H2-Q7/H2-Q6/H2-M2	10	GO_BP	down
[truncated: 5,095 more rows]

## Sheet: TAC TEC_Proliferating TECs
ID	Description	GeneRatio	BgRatio	pvalue	p.adjust	qvalue	geneID	Count	Cluster	Direction
[truncated: 5,951 more rows]

[truncated: 9 more sheets: mTEC I_Intertypical, mTEC II_Aire, mTEC III_Post-Aire, Tuft like mTEC, Globet like mteC, Microfold like mTEC, Ionocyte like mTEC, Neuroendocrine mTEC, aaTECs]
