# Supplementary material for: The cooperation between RNA binding proteins ZFP36L1 and ZFP36L2 controls thymic epithelial cell differentiation to promote thymus function.
Source: Research Square preprint supplement (doi:10.21203/rs.3.rs-6941685/v1), 2025-06-25
Supplement: Supplementary file 4 [file 5dd35a13d1ca0f34aeef3e13.xlsx]

## Sheet: README
Column	Description
p_val	Uncorrected p-value
avg_log2FC	Mean log2 fold change group 1 vs group 2
pct.1	Fraction cells expressing gene in group 1
pct.2	Fraction cells expressing gene in group 2
p_val_adj	Adjusted p-value
gene	Gene
p_val_adj_score	Score calculated as follows: -log10(p_val_adj)*sign(avg_log2FC)
avg.1	Mean expression in group 1
avg.2	Mean expression in group 2
ensembl_gene_id	Ensembl gene id (if available)
external_gene_name	Gene symbol (if available)
chromosome_name	Chromosome name of gene (if available)
start_position	Start position of gene (if available)
end_position	End position of gene (if availablen)
percentage_gene_gc_content	GC content of gene (if available)
gene_biotype	Biotype of gene (if available)
strand	Strand of gene (if available)
description	Description of gene (if available)
cluster	Cluster
p_val_adj_score	Score calculated as follows: -log10(p_val_adj)*sign(avg_log2FC)
avg_<assay>_<slot>_id<cluster>	Average expression value for cluster; <assay>: RNA or SCT; <slot>: raw counts or normalised data

## Sheet: cTEC
p_val	avg_log2FC	pct.1	pct.2	p_val_adj	cluster	gene	p_val_adj_score	avg_RNA_counts_idcTEC	avg_RNA_counts_idPdpn+ TEC	avg_RNA_counts_idMimetic globet	avg_RNA_counts_idUnknown	avg_RNA_counts_idmTEC-I	avg_RNA_counts_idTransit-amplifying/Proliferating	avg_RNA_counts_idmTEC-II	avg_RNA_counts_idmTEC-II (Post-Aire)	avg_RNA_counts_idMicrofoldTEC	avg_RNA_counts_idEndoTEC	avg_RNA_counts_idIonocytes mTEC	avg_RNA_counts_idTuft cells	avg_RNA_counts_idT-cells	avg_RNA_counts_idParathyroid cells	avg_RNA_counts_idMesenchymal cells	avg_RNA_counts_idEndothelial cells	avg_RNA_data_idcTEC	avg_RNA_data_idPdpn+ TEC	avg_RNA_data_idMimetic globet	avg_RNA_data_idUnknown	avg_RNA_data_idmTEC-I	avg_RNA_data_idTransit-amplifying/Proliferating	avg_RNA_data_idmTEC-II	avg_RNA_data_idmTEC-II (Post-Aire)	avg_RNA_data_idMicrofoldTEC	avg_RNA_data_idEndoTEC	avg_RNA_data_idIonocytes mTEC	avg_RNA_data_idTuft cells	avg_RNA_data_idT-cells	avg_RNA_data_idParathyroid cells	avg_RNA_data_idMesenchymal cells	avg_RNA_data_idEndothelial cells
0	6.50003	0.898	0.194	0	cTEC	Prss16	#NUM!	50.811	1.84632	0.132653	0.971332	0.11608	0.649554	0.650746	0.153909	0.0896861	0.117371	0.20339	0.103571	0.243346	3.11404	0.0597015	0.0869565	4.85856	1.69372	1.12847	1.43326	1.10691	1.15975	1.1871	1.0917	1.07309	1.06227	1.07735	1.06106	1.19827	1.44464	1.0788	1.10261
0	6.09091	0.705	0.032	0	cTEC	Psmb11	#NUM!	5.63138	0.136114	0.0102041	0.0708263	0.0152236	0.0714286	0.209808	0.0415309	0	0.0187793	0.0338983	0.0142857	0.0304183	0.315789	0.0149254	0	2.34165	1.07182	1.01154	1.03469	1.01528	1.02139	1.06609	1.02218	1	1.00823	1.01751	1.00997	1.03284	1.05178	1.00583	1
0	4.07751	0.968	0.456	0	cTEC	Tbata	#NUM!	117.656	1.60263	0.540816	0.846543	0.931494	15.7801	31.0175	6.47394	0.269058	0.56338	0.254237	0.407143	0.562738	8.35088	0.0597015	0.26087	6.14759	1.73691	1.46883	1.44815	1.69378	2.92206	3.87949	2.6844	1.32213	1.26493	1.09502	1.30954	1.48817	2.00421	1.04364	1.34061
0	3.7987	0.911	0.338	0	cTEC	Ccl25	#NUM!	67.3629	1.2876	0.390306	0.43339	0.329448	1.36272	22.1023	6.51629	1.13901	0.446009	0.40678	0.389286	0.479087	4.31579	0.119403	0.26087	5.31314	1.61306	1.29952	1.23612	1.34587	1.34816	3.52437	2.55855	1.71384	1.23227	1.14195	1.26784	1.48178	1.63583	1.15364	1.4091
0	3.69351	0.864	0.219	0	cTEC	Cxcl12	#NUM!	23.1002	8.99012	0.298469	3.28836	0.599905	0.196429	0.174414	0.0333876	0.0313901	0.131455	0.101695	0.132143	0.114068	0.692982	2.47761	10.087	3.85324	3.11101	1.24125	2.11434	1.40557	1.04953	1.05703	1.02719	1.04922	1.05772	1.0325	1.0852	1.10538	1.11096	1.9898	4.58964
0	3.57064	0.992	0.751	0	cTEC	Ctsl	#NUM!	209.395	35.7497	8.45153	17.484	13.9039	7.05692	4.94456	2.49756	0.887892	1.55399	14.3729	2.89286	2.31179	17.1053	17.5821	3.47826	6.86867	4.84451	3.29927	3.9095	4.12967	2.19411	2.07078	2.00916	1.7039	1.66188	3.15023	1.87701	2.42506	2.7694	3.89756	3.3531
0	3.3961	0.828	0.251	0	cTEC	Ly75	#NUM!	7.1966	1.77497	0.22449	0.522766	0.203616	0.28125	0.498934	0.855049	0.399103	0.375587	0.440678	0.146429	0.342205	0.192982	0.0597015	0.0869565	2.68117	1.76191	1.14742	1.23947	1.23144	1.07609	1.16738	1.45334	1.30707	1.21101	1.15876	1.11827	1.24847	1.03696	1.01545	1.0723
0	3.38864	0.896	0.291	0	cTEC	Ndrg3	#NUM!	7.53686	0.937431	0.377551	1.10118	0.325167	0.537946	0.402559	0.419381	0.439462	0.755869	8.22034	0.857143	0.48289	0.631579	0.462687	0.130435	2.73567	1.43674	1.27325	1.47676	1.29991	1.13468	1.13698	1.25773	1.38322	1.34081	2.38101	1.44729	1.49663	1.14504	1.2772	1.2468
0	2.96113	0.979	0.796	0	cTEC	Cstb	#NUM!	83.0359	6.98024	3.3699	10.5548	4.19339	12.6172	18.4068	13.8208	2.98206	4.89671	5.64407	2.44643	2.3308	5.58772	4.65672	0.521739	5.54331	2.87326	2.38258	3.23665	2.74648	2.66462	3.30284	3.52602	2.54881	2.41006	2.33987	1.92083	2.15913	1.88615	2.45859	1.60569
0	2.86968	0.957	0.387	0	cTEC	Pltp	#NUM!	17.8733	9.1416	0.469388	1.2968	1.70029	1.30915	0.627292	0.129479	0.058296	0.0985915	0.288136	0.075	0.224335	0.815789	1.07463	1.73913	3.68391	3.18496	1.36959	1.56454	2.03236	1.32495	1.18238	1.0703	1.05445	1.06185	1.10292	1.0415	1.1455	1.18238	1.49158	2.45148
0	2.65698	0.957	0.587	0	cTEC	Prxl2b	#NUM!	20.3025	3.36443	0.596939	2.73187	1.9246	6.80692	5.95011	2.33469	0.318386	0.685446	0.644068	0.532143	0.212928	2.66667	0.656716	0.217391	3.84244	2.20206	1.4254	1.97258	2.0563	2.09543	2.14794	1.86462	1.267	1.34024	1.23926	1.1983	1.14094	1.5205	1.32144	1.33887
0	2.65101	0.994	0.876	0	cTEC	Krt18	#NUM!	124.516	18.1811	19.7781	34.3879	8.44791	22.24	25.2891	12.9837	2.89238	18.5962	36.9153	26.65	0.958175	11.5088	0.791045	0.217391	6.20551	4.01451	4.33881	4.71503	3.664	3.34743	3.65891	3.55901	2.36395	3.93973	4.36116	4.55974	1.52669	2.56888	1.3926	1.37968
0	2.854	0.949	0.546	0	cTEC	Tmem131l	314.192	13.845	1.95499	0.660714	0.563238	1.12131	1.96205	2.01023	1.7101	1.02242	2.64789	0.728814	1.59286	0.927757	0.72807	0.104478	0.173913	3.68931	1.84414	1.47781	1.29884	2.0221	1.4977	1.63246	1.91505	1.90142	1.9598	1.2603	1.82446	1.7113	1.16194	1.04989	1.17149
0	2.23898	0.983	0.632	0	cTEC	Gas6	311.855	21.087	12.2876	1.22704	4.57504	2.91151	2.99777	2.1032	1.5399	0.0717489	0.859155	3	0.339286	0.163498	2.02632	1.92537	1.26087	3.91297	3.54976	1.8053	2.43597	2.54334	1.62067	1.54186	1.66515	1.05945	1.37635	1.8373	1.17614	1.10829	1.44695	1.80211	2.19811
0	3.64429	0.728	0.21	0	cTEC	Pithd1	309.467	5.20227	0.428101	0.15051	0.374368	0.106089	0.997768	0.503625	0.375407	0.0627803	0.370892	0.322034	0.442857	0.21673	0.692982	0.328358	0.0869565	2.22992	1.21121	1.10028	1.17789	1.10643	1.22383	1.14798	1.16811	1.04876	1.19342	1.10251	1.20099	1.16756	1.15234	1.25918	1.10411
1.58691e-298	2.72826	0.913	0.332	5.34726e-294	cTEC	Slc46a2	293.272	9.87713	1.60263	0.193878	0.487352	1.31803	4.11161	0.979957	0.332248	0.0403587	0.107981	2.16949	0.471429	0.0342205	0.421053	0.0597015	0	3.06253	1.67239	1.15282	1.21589	1.89472	1.78724	1.25866	1.18866	1.05117	1.05543	1.61024	1.13804	1.02976	1.08383	1.02588	1
1.00824e-292	3.85776	0.737	0.196	3.39737e-288	cTEC	Isg20	287.469	8.89603	0.467618	2.93367	0.41484	0.0827783	0.284598	0.633262	0.821661	0.224215	1.723	2.25424	0.414286	0.380228	0.552632	0.268657	0.26087	2.77315	1.24806	2.15265	1.17955	1.0727	1.0629	1.18133	1.38096	1.09379	1.72186	1.63637	1.20888	1.23052	1.08993	1.1554	1.46107
2.44395e-292	2.50745	0.896	0.418	8.23513e-288	cTEC	Pax1	287.084	9.28922	3.66081	2.13776	3.11298	0.690057	1.20312	1.18806	0.172638	0.0224215	0.328638	2.42373	0.514286	0.0874525	1.57895	0.0597015	0	2.84609	2.26425	2.06012	2.05955	1.571	1.2799	1.31527	1.09208	1.02963	1.15878	1.64129	1.25486	1.05157	1.3641	1.02186	1
5.40993e-287	1.75285	0.958	0.757	1.82293e-282	cTEC	Ndufa11	281.739	21.3214	11.8222	3.54082	5.5683	3.56541	12.5402	6.86823	3.24593	1.47982	5.38498	10.8475	3.23214	1.3308	5.52632	2.85075	0.695652	3.87842	3.47324	2.51034	2.63672	2.5538	2.63329	2.25875	2.12476	1.87406	2.54412	2.89653	2.00357	1.68777	1.98324	2.15599	1.78437
9.50384e-280	4.21794	0.628	0.086	3.20241e-275	cTEC	Syngr1	274.495	2.77505	0.430296	0.127551	0.526138	0.032588	0.210938	0.0857143	0.034202	0.00896861	0.159624	0.525424	0.103571	0.0494297	0.438596	0.0447761	0	1.82027	1.21195	1.07095	1.2557	1.02365	1.04967	1.02409	1.02067	1.00536	1.09315	1.1564	1.03746	1.04026	1.11793	1.05894	1
5.96188e-274	1.90709	0.953	0.662	2.00891e-269	cTEC	Bnip3l	268.697	14.8374	2.84413	0.887755	3.04553	1.19172	15.8136	9.85416	2.32818	1.16143	2.85446	2.76271	1.63214	1.31559	4.23684	1.76119	0.826087	3.40026	2.06686	1.51741	2.10745	1.74896	2.84381	2.55557	1.83107	1.67981	1.96509	1.7271	1.5648	2.0107	1.85473	1.81952	1.90703
3.33444e-250	3.38561	0.737	0.154	1.12357e-245	cTEC	Castor1	244.949	3.84688	0.813392	0.109694	0.546374	0.259515	0.558036	0.146269	0.0855049	0.0269058	0.0187793	0.288136	0.0571429	0.0684411	0.289474	0.164179	0.434783	2.10504	1.39021	1.10591	1.24282	1.20249	1.12872	1.04089	1.05637	1.02139	1.00915	1.08673	1.03721	1.05225	1.08166	1.07909	1.54966
1.34501e-249	2.76883	0.856	0.256	4.53214e-245	cTEC	Clic5	244.344	4.64839	0.608123	0.635204	0.382799	0.211941	0.527902	0.646482	1.34365	0.883408	0.690141	0.271186	1.11786	0.0456274	0.359649	0.0149254	0.608696	2.33839	1.2916	1.39374	1.18853	1.21382	1.12891	1.22011	1.67277	1.67584	1.34162	1.10266	1.60039	1.04645	1.07046	1.02061	1.71155
8.86106e-246	1.80154	0.989	0.84	2.98582e-241	cTEC	Krt8	240.525	52.2193	10.0933	11.1633	14.7403	4.72574	31.9475	26.8354	13.9446	7.31839	23.1972	14.7119	19.975	0.456274	4.61404	0.402985	0.130435	4.94133	3.27737	3.51765	3.62115	2.92536	3.70702	3.67455	3.52332	3.29248	4.17204	3.17472	4.0995	1.31043	1.87959	1.17072	1.21688
4.10843e-235	1.91214	0.894	0.575	1.38438e-230	cTEC	Plgrkt	229.859	6.87335	1.54555	0.642857	1.28836	0.715033	2.48326	2.10874	1.93078	1.08969	1.25352	1.9322	1.59286	0.901141	0.894737	0.791045	0.347826	2.57001	1.67044	1.45266	1.56415	1.61885	1.5112	1.53747	1.77375	1.68253	1.51326	1.56349	1.68775	1.71836	1.26925	1.42777	1.53048
2.18495e-234	1.76681	0.915	0.664	7.36242e-230	cTEC	Psmb9	229.133	11.7372	3.88255	2.2551	2.65936	1.38321	5.81696	5.02431	3.28583	1.65022	2.58216	3.30508	1.425	1.51711	0.614035	0.865672	0.869565	3.11001	2.33494	2.06939	2.07599	1.87126	1.98783	2.0369	2.13034	1.8135	1.91478	1.91574	1.56318	1.6553	1.11474	1.40732	1.91072
3.70728e-221	3.82895	0.59	0.058	1.24921e-216	cTEC	Shisa6	215.903	2.6862	0.0614709	0.0229592	0.18887	0.0287821	0.0502232	0.411087	0.25	0.421525	0.0892019	0.0677966	0.45	0.0152091	0.754386	0.0298507	0	2.01545	1.02762	1.02956	1.0802	1.03406	1.01268	1.1976	1.1629	1.36589	1.04166	1.01786	1.40121	1.01098	1.27674	1.06512	1
9.59221e-221	3.98459	0.59	0.067	3.23219e-216	cTEC	Pkhd1l1	215.491	1.49527	0.125137	0.0204082	0.0421585	0.032588	0.141741	0.344563	0.0513029	0	0.00469484	0.0677966	0	0.0190114	0.0438596	0	0	1.65053	1.06399	1.01477	1.02371	1.0346	1.04457	1.11345	1.05057	1	1.00114	1.02147	1	1.01266	1.01182	1	1
1.66162e-219	1.62537	0.955	0.765	5.59899e-215	cTEC	Lamp2	214.252	14.414	6.11087	2.45663	5.51602	1.99405	4.18192	6.09126	2.62296	2.19731	1.76526	6.33898	1.55	0.954373	3.64035	3.73134	0.869565	3.36004	2.70905	2.17176	2.55248	2.27243	1.80529	2.24306	2.00992	2.27347	1.70355	2.27818	1.65019	1.66826	1.79604	2.28048	2.01807
1.0068e-208	1.60543	0.883	0.628	3.3925e-204	cTEC	Snx3	203.469	6.99622	2.22503	1.16582	3.63069	0.797098	4.08817	2.57313	1.70521	0.986547	3.00939	4.0678	2.03929	1.90875	3.57895	1.83582	1.91304	2.567	1.91557	1.64699	2.18665	1.59291	1.76645	1.61546	1.68854	1.65866	2.03912	1.95496	1.7843	2.0627	1.76276	1.81405	2.55055
2.02466e-205	1.54412	0.883	0.671	6.8223e-201	cTEC	Psmb4	200.166	10.0794	3.30955	1.97704	3.48904	1.20147	9.35379	5.88699	2.70684	0.914798	2.61972	6	2.125	1.5057	2.89474	2	1.21739	2.91763	2.17587	1.93493	2.19116	1.73927	2.34519	2.12033	1.94087	1.46754	1.94847	2.27888	1.74556	1.84918	1.58702	1.84325	2.30579
4.57586e-203	2.34204	0.796	0.327	1.54188e-198	cTEC	Pepd	197.812	3.34216	0.71899	0.346939	0.505902	0.252617	0.868304	1.23369	0.542345	0.139013	0.352113	1.42373	0.3	0.269962	0.815789	0.522388	0.0434783	2.01159	1.3557	1.20861	1.24456	1.23791	1.20291	1.34489	1.28945	1.10762	1.16635	1.42093	1.12236	1.13677	1.22136	1.28136	1.05222
3.79787e-202	2.019	0.843	0.448	1.27973e-197	cTEC	Spryd7	196.893	4.54064	1.47311	0.765306	1.03541	0.5804	1.44085	1.058	1.06352	0.376682	0.666667	1.01695	0.614286	0.0912548	0.578947	0.19403	0	2.25227	1.65521	1.47842	1.45847	1.47386	1.33132	1.29644	1.5176	1.23352	1.31363	1.33842	1.28926	1.08281	1.13445	1.08887	1
1.59532e-201	2.54516	0.805	0.239	5.37558e-197	cTEC	Cds1	196.27	3.42911	0.784852	0.520408	0.649241	0.332303	0.310268	0.263113	0.34772	0.0627803	0.131455	2.20339	0.164286	0.0570342	0.631579	0.0597015	0	2.06572	1.39781	1.35349	1.2895	1.35431	1.10498	1.09269	1.21044	1.07362	1.07326	1.61595	1.09963	1.03292	1.18993	1.02216	1
2.89226e-196	1.56105	0.905	0.722	9.74575e-192	cTEC	Atp6v1g1	191.011	12.8053	5.01976	2.75255	9.61214	2.2079	4.28013	3.4371	3.19218	1.60538	3.79343	7.05085	2.64286	1.82129	6.29825	2.26866	0.913043	3.2306	2.57225	2.16994	3.15281	2.19069	1.79745	1.7848	2.0988	1.90306	2.20775	2.44847	1.85824	2.03499	2.11161	2.02771	2.01958
5.40228e-193	2.22492	0.86	0.383	1.82035e-188	cTEC	Copz2	187.74	6.53686	2.80461	0.581633	1.48061	1.10847	0.523438	0.393603	0.381922	0.044843	0.0798122	0.881356	0.232143	0.0532319	2.15789	1.77612	0.434783	2.56845	2.05967	1.40823	1.64592	1.75504	1.13856	1.11483	1.19612	1.05567	1.03816	1.27561	1.11567	1.0324	1.50308	1.76344	1.63012
4.98108e-192	2.80107	0.711	0.136	1.67843e-187	cTEC	Snhg11	186.775	5.11531	2.89133	0.0969388	2.51939	0.252141	0.0491071	0.128358	0.17101	0.0044843	2.01878	4.05085	0.467857	0.0418251	0.166667	0	0	2.42129	2.12296	1.08077	1.89408	1.24169	1.01405	1.04611	1.11792	1.00351	1.76242	1.94348	1.32843	1.028	1.05123	1	1
1.03891e-191	2.40086	0.832	0.251	3.50071e-187	cTEC	Crip3	186.456	12.8034	0.1427	0.0561224	0.246206	0.110371	4.60491	12.3612	2.79397	0.0672646	0.0938967	0.0677966	0.132143	0.0874525	0.719298	0.0298507	0.0434783	3.23941	1.08586	1.04738	1.15504	1.11659	1.85603	2.82281	1.91485	1.08809	1.04613	1.02552	1.09477	1.09655	1.11949	1.03434	1.06095
2.60046e-190	2.6273	0.743	0.161	8.76249e-186	cTEC	Synm	185.057	2.80718	1.07245	0.0306122	0.269815	0.410324	0.0982143	0.109595	0.0456026	0.0179372	0.0140845	0.0169492	0.0464286	0.0190114	0.0350877	0.701493	0.0869565	1.94715	1.48477	1.02151	1.14832	1.36183	1.02814	1.03976	1.02786	1.01968	1.00668	1.00326	1.02884	1.01395	1.00575	1.39735	1.11192
1.02857e-189	2.06916	0.839	0.442	3.46585e-185	cTEC	Dcxr	184.46	5.1966	1.59276	0.719388	1.1231	0.302331	1.81362	3.0951	1.61645	0.358744	0.788732	2.44068	0.65	0.152091	3.42982	0.164179	0.0434783	2.36472	1.67265	1.39195	1.46775	1.23882	1.40423	1.70819	1.66062	1.21294	1.3566	1.72678	1.33802	1.08631	1.68959	1.08326	1.08843
1.35108e-188	2.79017	0.694	0.203	4.55261e-184	cTEC	Psat1	183.342	3.33081	1.29418	0.15051	1.40641	0.163178	0.700893	0.306183	0.0789902	0.0313901	0.0140845	0.254237	0.0678571	0.197719	0.649123	0.223881	0	1.9193	1.57248	1.11495	1.59036	1.13051	1.1532	1.09028	1.0457	1.0179	1.00993	1.06956	1.02453	1.11098	1.17863	1.18872	1
1.89334e-186	1.82315	0.917	0.481	6.37979e-182	cTEC	Wnt4	181.195	7.64461	3.98134	1.98469	1.17875	1.51142	2.08482	0.86951	0.696254	0.0493274	0.910798	6.52542	0.125	0.0874525	0.464912	0.119403	0	2.75679	2.37687	2.03295	1.54727	2.0361	1.46978	1.26702	1.36976	1.03191	1.40034	2.45859	1.0451	1.06847	1.09754	1.06172	1
3.20518e-180	2.83358	0.716	0.181	1.08002e-175	cTEC	Fgf14	174.967	13.1928	0.497256	0.0331633	0.114671	0.0870599	0.50558	4.80043	3.83632	0.2287	6.98592	0.0338983	9.02857	0.102662	0.280702	0.0149254	0	3.40942	1.24879	1.0396	1.05301	1.10412	1.14714	2.22159	2.3214	1.15157	2.77148	1.01155	3.20524	1.05956	1.05683	1.00855	1
2.92501e-179	2.72982	0.675	0.125	9.8561e-175	cTEC	Kcnk2	174.006	2.39887	1.89462	0.147959	0.231029	0.166508	0.151786	0.0869936	0.036645	0.00896861	0.0751174	0.101695	0.0285714	0.0228137	0.114035	0.402985	0.0869565	1.83873	1.81286	1.10806	1.13171	1.16121	1.04473	1.03199	1.02186	1.008	1.06227	1.03152	1.03012	1.0151	1.02408	1.15385	1.11399
3.61108e-175	2.34761	0.766	0.274	1.21679e-170	cTEC	Bok	169.915	3.69565	0.692645	0.19898	0.456998	0.223121	3.87723	1.49296	0.503257	0.0941704	0.798122	0.0508475	0.0821429	0.0228137	0.192982	1.55224	0.304348	2.04689	1.31743	1.12486	1.24314	1.15216	1.73107	1.37824	1.23445	1.09475	1.33235	1.01609	1.0386	1.02324	1.03398	1.62357	1.37186
8.51467e-174	2.26168	0.817	0.332	2.8691e-169	cTEC	Shisa2	168.542	7.45369	1.95829	0.181122	4.10118	1.0716	1.16853	0.219616	0.104235	0.0896861	0.178404	0.322034	0.0857143	0.0836502	2.4386	0.223881	0	2.63798	1.77903	1.13175	2.25328	1.82224	1.26575	1.0735	1.06364	1.08668	1.07875	1.09743	1.02942	1.07954	1.52185	1.10872	1
6.20723e-173	1.50361	0.955	0.78	2.09159e-168	cTEC	Tsc22d1	167.68	17.7146	9.53238	3.78827	6.32209	2.67269	4.94643	4.48699	4.39658	0.775785	8.76526	10.6949	4.625	0.946768	8.86842	3.58209	1.95652	3.55742	3.24191	2.57642	2.7893	2.49308	1.9155	2.01289	2.4244	1.52707	3.0079	2.79836	2.43967	1.63127	2.44223	2.26939	2.55137
6.44675e-172	2.64908	0.73	0.201	2.1723e-167	cTEC	Cdh4	166.663	4.9414	0.901207	0.0433673	0.111298	0.15628	0.695312	1.84606	1.55049	0.161435	1.31925	0.0338983	0.189286	0.0190114	1.02632	0.119403	0.0869565	2.44551	1.42274	1.03915	1.06005	1.17616	1.20853	1.59769	1.72862	1.15738	1.58464	1.02095	1.11706	1.02761	1.41383	1.07027	1.10477
3.13935e-171	2.49732	0.682	0.236	1.05783e-166	cTEC	Zfyve21	165.976	2.5482	1.29528	0.219388	0.689713	0.140343	0.645089	0.432409	0.161238	0.0313901	0.230047	0.305085	0.25	0.209125	0.464912	0.746269	0	1.7488	1.57415	1.1429	1.33291	1.10364	1.14147	1.1179	1.08473	1.0209	1.1127	1.10492	1.09867	1.13597	1.12279	1.44695	1
2.29697e-169	2.2382	0.771	0.321	7.73986e-165	cTEC	Ociad2	164.111	4.25331	1.06476	0.375	1.03035	0.54686	1.62277	0.559915	0.214984	0.103139	1.14085	5.27119	2.675	0.0456274	1.9386	0.0597015	0	2.14946	1.46684	1.24396	1.43455	1.38874	1.35476	1.15034	1.10947	1.11494	1.49551	2.19696	2.01722	1.04015	1.4418	1.03628	1
7.84747e-169	1.34997	0.888	0.696	2.64428e-164	cTEC	Sf3b6	163.578	9.0794	5.43139	1.95918	3.44013	1.70909	7.1529	3.78849	2.16368	1.18386	2.21127	5.08475	2.18929	1.90875	3	1.74627	0.434783	2.84031	2.62009	1.9774	2.16747	1.99601	2.12576	1.81941	1.83709	1.69322	1.80496	2.13265	1.74456	2.05144	1.62457	1.75798	1.46545
4.59499e-167	1.853	0.811	0.447	1.54833e-162	cTEC	Dynlt3	161.81	4.46503	1.92755	0.737245	2.69983	0.468839	1.88728	1.2742	0.694625	0.233184	0.85446	3.16949	1.10357	0.285171	2.15789	1.22388	0.304348	2.14197	1.76554	1.42483	1.94081	1.33383	1.39513	1.32098	1.31385	1.172	1.3762	1.8353	1.46613	1.21147	1.47299	1.5947	1.37042
3.53903e-164	1.96288	0.849	0.457	1.19251e-159	cTEC	Tst	158.924	6.7845	1.67398	3.22449	2.08094	1.40247	2.92969	1.30448	0.693811	0.242152	0.629108	1.55932	0.760714	0.0608365	0.429825	0.268657	0	2.62546	1.69102	2.1847	1.84077	1.82305	1.60154	1.33177	1.32301	1.20619	1.24446	1.46228	1.27731	1.04821	1.08854	1.19789	1
1.79132e-162	3.22347	0.499	0.056	6.03603e-158	cTEC	P4ha3	157.219	1.33837	0.527991	0.214286	0.084317	0.0696955	0.0200893	0.0511727	0.0382736	0	0.00469484	0	0.00357143	0.00760456	0.0350877	0.0447761	0	1.46712	1.25086	1.16318	1.03914	1.06261	1.005	1.01757	1.0274	1	1.00202	1	1.00725	1.01551	1.01006	1.01482	1
1.29999e-160	1.37879	0.898	0.655	4.38046e-156	cTEC	Etfa	155.358	7.32703	3.191	1.48724	2.90556	0.965509	6.53125	4.92026	1.77362	1.38565	1.22535	6.52542	1.30357	0.73384	1.96491	1.41791	0.478261	2.64286	2.17573	1.81418	2.07441	1.70572	2.06875	2.00827	1.75809	1.87656	1.49995	2.37457	1.55489	1.4511	1.4557	1.63796	1.61923
1.98353e-160	1.95312	0.847	0.425	6.6837e-156	cTEC	Hexb	155.175	7.2552	4.05488	1.02551	3.1231	1.26237	0.59375	0.77484	0.415309	0.121076	0.244131	12.339	0.317857	0.593156	0.701754	0.880597	0.347826	2.65046	2.37766	1.60164	2.0607	1.81312	1.15335	1.2243	1.21921	1.10148	1.13058	3.01562	1.13748	1.28147	1.16767	1.45037	1.37323
1.35901e-157	2.09489	0.767	0.23	4.57933e-153	cTEC	Rgcc	152.339	6.41777	3.49286	0.331633	2.20067	0.364891	0.378348	0.8371	0.754886	0.125561	0.131455	1.57627	0.603571	4.86312	0.122807	0.373134	8.91304	2.52817	2.2439	1.28986	1.81274	1.39151	1.11892	1.2844	1.40196	1.10192	1.08479	1.43262	1.23565	3.01155	1.02259	1.25226	4.42659
1.36042e-154	1.89503	0.977	0.775	4.58406e-150	cTEC	Fabp5	149.339	115.781	11.7212	1.89031	8.13491	4.58373	84.4096	102.619	53.4813	56.7713	4.95305	1.32203	2.33571	3.03802	5.14912	1.86567	5.91304	6.07058	3.35144	2.06388	3.01497	2.82578	4.88335	5.35517	5.19386	5.88556	2.37901	1.44468	1.96709	2.25314	1.7194	1.96003	3.93455
4.79121e-154	3.01446	0.554	0.126	1.61444e-149	cTEC	Gm14207	148.792	1.63705	0.0493963	0.00510204	0.00505902	0.0340152	0.422991	0.663113	0.25	0.0403587	0.389671	0.40678	0.0464286	0.0114068	0.131579	0.0298507	0.0434783	1.54965	1.02693	1.00282	1.00317	1.02678	1.10736	1.19577	1.13142	1.04329	1.17846	1.16144	1.01838	1.00818	1.03802	1.02435	1.14474
7.94559e-151	4.4385	0.369	0.026	2.67735e-146	cTEC	Ppp1r27	145.572	4.95463	0.0548847	0.0255102	0.693086	0.00903901	0.0412946	0.854158	0.0667752	0	0.028169	0.0169492	0.382143	0.0380228	0.0614035	0	0	2.13687	1.02672	1.02585	1.27165	1.01038	1.01416	1.23189	1.03634	1	1.02454	1.01585	1.08845	1.02083	1.01132	1	1
1.16849e-146	2.23375	0.69	0.167	3.93735e-142	cTEC	Ust	141.405	2.3724	0.874863	0.32398	0.640809	0.347764	0.258929	0.141578	0.196254	0.0403587	0.122066	0.576271	0.146429	0.125475	0.622807	1.20896	0	1.88754	1.44224	1.22991	1.30295	1.36235	1.08595	1.0642	1.14562	1.01875	1.06588	1.20442	1.06877	1.09891	1.20281	1.66741	1
4.81473e-146	2.65447	0.569	0.098	1.62237e-141	cTEC	Diras2	140.79	1.75425	1.03732	0.104592	0.220911	0.178639	0.0234375	0.0379531	0.0333876	0	0.0140845	0.0338983	0.00357143	0	0.0438596	0.0149254	0	1.62862	1.49359	1.09048	1.10406	1.17167	1.0087	1.01352	1.02521	1	1.00675	1.02026	1.00225	1	1.00723	1.02356	1
6.95111e-145	3.12744	0.516	0.086	2.34225e-140	cTEC	Slc36a1	139.63	1.44802	0.260154	0.0663265	0.217538	0.0330637	0.0625	0.110874	0.162052	0.237668	0.586854	0.542373	0.0785714	0.0418251	0.0964912	0.119403	0	1.50505	1.13589	1.0512	1.11336	1.04096	1.01775	1.0426	1.10188	1.27021	1.27701	1.18184	1.04589	1.04974	1.02162	1.07256	1
1.55762e-142	1.81027	0.913	0.521	5.24856e-138	cTEC	Il7	137.28	8.65974	3.14709	1.12755	3.81113	1.93316	2.57701	0.970149	0.568404	1.44395	0.366197	1.05085	0.357143	0.0684411	0.535088	0.0447761	0.0869565	2.97078	2.18812	1.71233	2.32277	2.26734	1.57974	1.29741	1.30894	2.04292	1.17106	1.35655	1.16933	1.06871	1.10344	1.02873	1.23732
1.76256e-142	1.72334	0.864	0.568	5.93911e-138	cTEC	Ifi27	137.226	10.4499	6.86059	1.16071	7.44688	1.01284	3.02455	3.09339	2.47394	1.26457	4.03756	3.40678	2.28214	0.726236	11.7368	4.08955	1.26087	3.02534	2.87365	1.62822	2.89737	1.63776	1.59703	1.74366	1.92974	1.72649	2.27661	1.86594	1.79974	1.58425	2.70497	2.47104	2.14707
2.5924e-142	1.89804	0.762	0.23	8.73536e-138	cTEC	AI646519	137.059	2.78828	1.91987	0.997449	1.45025	0.429353	0.238839	0.0469083	0.0211726	0.0134529	0.0187793	0.915254	0.0857143	0.0570342	0.333333	0.0597015	0	1.84459	1.8163	1.61717	1.60785	1.36086	1.0584	1.01636	1.01941	1.0148	1.00727	1.2689	1.03806	1.02888	1.08403	1.01803	1
3.33719e-142	1.90428	0.803	0.337	1.1245e-137	cTEC	Gmpr	136.949	3.90359	1.77168	0.604592	0.868465	0.730971	0.649554	0.789765	0.241857	0.0672646	0.431925	2.37288	0.342857	0.0532319	0.394737	0.0597015	0.26087	2.09199	1.73951	1.39428	1.36639	1.5384	1.15307	1.22974	1.13195	1.0804	1.2315	1.63987	1.18618	1.04219	1.08343	1.03919	1.35274
9.49512e-142	2.37367	0.699	0.2	3.19947e-137	cTEC	Akap12	136.495	2.85822	0.731065	0.0408163	0.650927	0.209324	0.603795	0.966311	0.508143	0.0224215	0.230047	0.423729	0.482143	0.334601	0.122807	2.85075	1.17391	1.99562	1.33453	1.03823	1.32342	1.22024	1.13966	1.31641	1.28097	1.02703	1.13013	1.12553	1.23072	1.31247	1.02335	2.09067	2.10883
5.07387e-141	1.46109	0.892	0.622	1.70969e-136	cTEC	Sppl2a	135.767	6.26654	1.64654	1.93112	1.48567	1.00452	4.49442	3.37783	1.96987	1.01794	1.44131	2.89831	0.617857	0.581749	1.45614	1.58209	1.04348	2.54638	1.71989	1.93877	1.66439	1.79427	1.83521	1.79414	1.79757	1.73425	1.59105	1.76632	1.28908	1.37134	1.3622	1.63427	2.06709
3.08093e-140	1.62929	0.87	0.36	1.03815e-135	cTEC	Kctd1	134.984	4.12287	1.82217	0.522959	0.942664	1.06113	0.902902	0.150533	0.214984	0.0179372	0.159624	0.644068	0.25	0.326996	2.18421	0.19403	0	2.23989	1.79652	1.34896	1.44859	1.89332	1.27311	1.06287	1.1335	1.01878	1.07762	1.18154	1.13285	1.33679	1.67953	1.10639	1
1.17882e-138	3.47471	0.463	0.073	3.97216e-134	cTEC	Dusp28	133.401	1.2344	0.178924	0.0688776	0.209106	0.0468601	0.0892857	0.0541578	0.0814332	0.0269058	0.164319	0.271186	0.0857143	0.0722433	0.587719	0.104478	0.0869565	1.43769	1.09825	1.05494	1.1094	1.03794	1.02322	1.01681	1.04256	1.02986	1.09428	1.09689	1.04019	1.06882	1.14226	1.04858	1.12594
6.41752e-136	3.07319	0.463	0.061	2.16245e-131	cTEC	Cdk20	130.665	0.941399	0.158068	0.0484694	0.0708263	0.0803996	0.100446	0.0434968	0.0130293	0.0134529	0.0610329	0	0.0428571	0.0418251	0.149123	0.149254	0.0869565	1.37332	1.08152	1.03738	1.04512	1.0841	1.02882	1.01532	1.00628	1.00818	1.02747	1	1.0178	1.06947	1.05583	1.08861	1.10964
3.02382e-134	2.22217	0.633	0.149	1.01891e-129	cTEC	Hey1	128.992	2.47826	0.615807	0.25	2.81282	0.21313	0.315848	0.0724947	0.0382736	0.044843	0.0140845	0.0677966	0.0964286	0.0570342	0.0964912	0.0298507	0.217391	1.74055	1.30378	1.19791	2.06835	1.20265	1.08926	1.02069	1.02436	1.0489	1.00564	1.02095	1.0321	1.03353	1.01796	1.03119	1.40792
5.5519e-134	1.67063	0.924	0.656	1.87077e-129	cTEC	Sfn	128.728	19.448	6.20527	4.57143	13.4654	2.55257	3.47656	2.63156	8.98127	3.19731	2.29577	5.79661	0.860714	0.269962	0.385965	0.761194	0.0869565	3.6596	2.77123	2.80455	3.47998	2.4033	1.70002	1.68539	3.12812	2.46877	1.86643	2.3177	1.4106	1.13824	1.08571	1.32063	1.13429
4.57678e-133	3.16129	0.435	0.052	1.54219e-128	cTEC	Abat	127.812	0.977316	0.481888	0.0102041	0.111298	0.010942	0.0234375	0.108316	0.0350163	0.0313901	0.0751174	0.0677966	0.0285714	0.0152091	0.412281	0.298507	0	1.35284	1.24858	1.00765	1.05407	1.01448	1.00975	1.03807	1.02623	1.02134	1.04319	1.01293	1.02589	1.02464	1.11984	1.14297	1
1.95747e-132	1.30211	0.879	0.629	6.59589e-128	cTEC	Fkbp1a	127.181	6.85255	2.82876	0.892857	3.77403	1.0628	8.22991	3.52367	1.68322	1.29148	2.40845	4.05085	2.36429	1.69582	2.68421	4.23881	2.86957	2.54914	2.03685	1.53321	2.30639	1.66541	2.2398	1.77281	1.67089	1.84539	1.89454	1.98653	1.81959	1.98285	1.60662	2.54702	3.07389
2.54913e-131	2.16355	0.737	0.274	8.58956e-127	cTEC	Rnpepl1	126.066	2.25142	0.364435	0.352041	0.335582	0.260704	0.575893	0.366311	0.456026	0.475336	0.812207	0.440678	0.539286	0.125475	0.508772	0.61194	0.217391	1.84557	1.19931	1.23882	1.17933	1.30659	1.14694	1.12093	1.26267	1.41712	1.42012	1.15118	1.31017	1.11493	1.11673	1.3703	1.3252
1.23263e-130	1.90088	0.726	0.35	4.15347e-126	cTEC	Smim29	125.382	2.65406	0.450055	0.454082	0.401349	0.316127	1.47433	1.15309	0.88355	0.363229	0.553991	0.661017	0.328571	0.152091	0.666667	0.61194	0.130435	1.82964	1.23038	1.30486	1.21226	1.23693	1.31857	1.31058	1.40393	1.25573	1.26267	1.22642	1.16713	1.09032	1.18895	1.3538	1.18797
2.2972e-130	2.63412	0.586	0.185	7.74066e-126	cTEC	Nqo1	125.111	3.06049	1.35126	0.19898	0.362563	0.108706	0.158482	0.943284	0.312704	0.0358744	0.0328638	0.0508475	0.05	0.0228137	0.201754	0.0298507	0	1.87142	1.5789	1.15491	1.15925	1.10718	1.03834	1.2703	1.17521	1.02305	1.01663	1.01171	1.04864	1.0288	1.03833	1.02883	1
2.86028e-130	2.0716	0.699	0.298	9.638e-126	cTEC	Exoc7	125.016	2.41588	0.79034	0.369898	0.709949	0.258325	0.705357	0.464819	0.314332	0.179372	0.483568	0.677966	0.296429	0.136882	0.77193	0.462687	0.0869565	1.76278	1.39314	1.25268	1.33022	1.24582	1.16823	1.13801	1.17718	1.16273	1.22625	1.23795	1.16686	1.10096	1.20612	1.25539	1.12543
6.88919e-130	2.34641	0.616	0.152	2.32138e-125	cTEC	Spock2	124.634	1.87146	0.701427	0.0204082	0.254637	0.184824	0.176339	0.637953	0.107492	0.0134529	0.511737	0.101695	0.114286	0.0228137	0.0526316	0.0597015	0.130435	1.65673	1.34346	1.01494	1.12142	1.1907	1.04667	1.18143	1.05324	1.02726	1.23677	1.0315	1.02435	1.01338	1.00919	1.02099	1.18437
1.11596e-129	2.23163	0.645	0.225	3.76033e-125	cTEC	Sfxn1	124.425	2.15123	0.841932	0.288265	0.763912	0.152474	1.33147	0.326652	0.161238	0.058296	0.305164	0.915254	0.321429	0.21673	0.833333	0.58209	0.173913	1.67235	1.40885	1.20141	1.3497	1.13737	1.28606	1.08997	1.08433	1.05469	1.15028	1.29492	1.11275	1.15062	1.21347	1.26316	1.28269
1.26026e-128	1.62735	0.817	0.306	4.24658e-124	cTEC	Mtss2	123.372	3.23251	1.07355	0.280612	1.03373	0.853473	0.429688	0.137313	0.0903909	0.112108	0.14554	0.20339	0.15	0.0532319	0.219298	0.507463	0.0434783	2.0445	1.50656	1.20962	1.47389	1.78995	1.1273	1.05456	1.07706	1.11313	1.07064	1.10057	1.04645	1.05198	1.10421	1.4482	1.02566
3.76673e-128	2.55482	0.59	0.136	1.26924e-123	cTEC	Slc4a4	122.896	2.5104	1.03513	1.26786	0.952782	0.0539962	0.194196	0.480597	0.223127	0.0941704	0.0938967	0.186441	0.185714	0.0152091	0.289474	0.298507	0	1.82935	1.48943	1.70188	1.42505	1.06541	1.05402	1.17567	1.15098	1.05881	1.0365	1.05108	1.19547	1.02321	1.10732	1.15046	1
1.60925e-127	2.22815	0.637	0.161	5.42252e-123	cTEC	Scnn1a	122.266	1.6673	0.353458	0.591837	0.192243	0.119886	0.113839	0.321962	0.719055	0.300448	0.464789	3.10169	0.210714	0.0228137	0.131579	0.0447761	0.0434783	1.623	1.19501	1.36054	1.09309	1.12559	1.02716	1.10476	1.36885	1.20673	1.22125	1.79735	1.12351	1.01971	1.03719	1.02841	1.04746
1.24692e-126	2.90006	0.626	0.224	4.20164e-122	cTEC	Fxyd2	121.377	11.3516	0.489572	0.34949	0.537943	0.24667	1.50335	1.89595	4.44381	6.81166	1.00469	31.8136	0.289286	0.323194	1.51754	0.104478	0.0869565	3.18591	1.24665	1.19523	1.28392	1.22537	1.36415	1.53812	2.32515	3.0431	1.40959	4.26216	1.16163	1.25552	1.24375	1.09755	1.16203
2.18986e-126	2.20464	0.669	0.211	7.37894e-122	cTEC	St3gal6	121.132	3.0775	1.6685	0.681122	1.1231	0.131304	0.126116	0.61194	0.48127	0.0538117	2.38967	1.77966	0.367857	0.1673	0.0614035	0.164179	1.21739	1.91095	1.72819	1.40074	1.4669	1.1299	1.03755	1.19134	1.2388	1.039	1.87565	1.53418	1.28692	1.15294	1.01208	1.08158	2.1378
5.02784e-126	2.17152	0.684	0.23	1.69418e-121	cTEC	Ppic	120.771	2.23062	0.706915	0.806122	1.26138	0.260466	1.21987	0.339872	0.0610749	0.00896861	0.0375587	1.35593	0.592857	0.0418251	0.991228	2.8806	1.08696	1.73013	1.33965	1.35152	1.51192	1.18817	1.27201	1.0903	1.03785	1.01878	1.0233	1.32524	1.15273	1.02749	1.24224	1.97568	2.13926
6.35043e-125	2.09611	0.554	0.112	2.13984e-120	cTEC	Grm8	119.67	3.28166	4.42591	0.0663265	0.279933	0.247383	0.0747768	0.444776	0.0757329	0.00896861	0.286385	0.186441	0.278571	0.0988593	0.00877193	0	0	2.04331	2.52873	1.03591	1.10281	1.24359	1.01688	1.16281	1.05505	1.00286	1.11833	1.06573	1.08893	1.05744	1.00143	1	1
3.01315e-124	1.69331	0.968	0.905	1.01531e-119	cTEC	Fth1	118.993	94.6786	31.5939	23.3189	30.4148	14.2426	44.9866	28.2072	21.18	20.8475	16.4131	36.2881	13.0429	23.1521	102.211	52.2388	8.6087	5.77798	4.72331	4.40303	4.68691	4.17611	4.09377	3.74075	4.0593	4.46299	3.76622	4.34713	3.24059	4.48616	5.33208	5.65019	4.31721
3.66923e-122	2.59482	0.456	0.068	1.23638e-117	cTEC	Pcsk6	116.908	1.06616	0.261251	0.0484694	0.569983	0.10157	0.0881696	0.0652452	0.0252443	0	0.00938967	0.0338983	0.0178571	0.00380228	0.0350877	0.955224	0	1.44345	1.15819	1.04448	1.24819	1.12147	1.03245	1.02138	1.02101	1	1.00197	1.02198	1.00797	1.00109	1.00635	1.52802	1
3.86793e-121	1.24173	0.877	0.627	1.30334e-116	cTEC	Psmb5	115.885	6.49149	2.16465	1.75255	2.60202	0.94648	8.83929	4.85032	2.24674	0.838565	2.37559	6	2.38571	1.28517	3.88596	1.98507	0.869565	2.49307	1.87105	1.84899	1.9536	1.5853	2.27815	1.97149	1.82369	1.51378	1.87052	2.32783	1.70933	1.71757	1.7665	1.86734	1.94307
1.28796e-120	2.03668	0.55	0.115	4.3399e-116	cTEC	4933439K11Rik	115.363	1.0983	0.33809	0.188776	0.111298	0.248811	0.203125	0.0733475	0.0423453	0.0224215	0.0187793	0.186441	0.0285714	0.0114068	0.0877193	0	0	1.45037	1.17459	1.13593	1.05466	1.23862	1.05518	1.02573	1.03573	1.01121	1.01105	1.06212	1.02254	1.01276	1.01654	1	1
1.39377e-119	1.99584	0.741	0.299	4.69645e-115	cTEC	Man2a1	114.328	3.60681	1.67398	0.512755	0.826307	0.323501	0.581473	0.332196	0.42671	0.116592	4.30516	2.11864	1.45	0.669202	0.482456	3.35821	0.608696	2.10268	1.73362	1.36215	1.36355	1.32953	1.15491	1.13187	1.2519	1.10227	2.35248	1.57681	1.88863	1.60922	1.18347	2.24474	1.75167
1.89297e-119	3.3967	0.372	0.039	6.37856e-115	cTEC	Klf15	114.195	0.63327	0.35236	0.0280612	0.118044	0.0185538	0.00669643	0.0140725	0.000814332	0	0.0328638	0.0169492	0.00357143	0.00380228	0.210526	0.0895522	0	1.25245	1.18312	1.01915	1.06029	1.01432	1.00172	1.00413	1.00092	1	1.01718	1.0062	1.00155	1.0021	1.04947	1.06711	1
2.28672e-119	1.69808	0.819	0.39	7.70532e-115	cTEC	Gm56555	114.113	4.81853	2.4764	0.405612	1.43339	0.879638	0.530134	0.763753	0.821661	0.538117	0.314554	0.694915	0.642857	0.129278	0.535088	0.641791	0	2.28966	1.98629	1.29784	1.56712	1.73362	1.13585	1.25288	1.47068	1.37373	1.15021	1.20724	1.22549	1.10942	1.16224	1.28465	1
2.97298e-119	2.25188	0.637	0.193	1.00178e-114	cTEC	Dact2	113.999	2.55009	0.844127	0.183673	0.44688	0.235728	0.204241	0.246055	0.408795	0.0896861	0.399061	1.22034	0.15	0.0190114	0.157895	0.268657	0	1.76536	1.39964	1.13522	1.20497	1.25574	1.06043	1.08984	1.2261	1.09069	1.21699	1.3963	1.11793	1.01506	1.0604	1.11258	1
3.15444e-119	1.4593	0.716	0.227	1.06292e-114	cTEC	Gm36660	113.973	11.7561	10.3359	2.15561	12.5194	2.64367	0.870536	0.119403	0.577362	0.452915	0.244131	10.4576	0.492857	0.193916	0.421053	0.0298507	0.130435	3.26824	3.34275	2.1595	3.40253	2.61811	1.22808	1.0506	1.42184	1.43994	1.1526	2.69165	1.14716	1.15329	1.10826	1.02793	1.2348
2.23309e-116	1.20893	0.913	0.658	7.52462e-112	cTEC	Cnn3	111.124	7.20416	4.59276	1.05867	4.53457	1.07612	6.25446	4.27036	2.1873	0.928251	1.6385	3.32203	3.01786	0.745247	0.263158	2.74627	1.04348	2.63455	2.4725	1.61748	2.40775	1.78215	2.03704	1.90196	1.8797	1.5778	1.64694	1.81996	2.14676	1.69235	1.04952	2.36673	2.15693
2.09556e-115	1.80212	0.762	0.33	7.06119e-111	cTEC	Ccdc34	110.151	2.95841	1.05159	0.747449	0.826307	0.411989	3.35268	0.620896	0.27443	0.0717489	0.596244	0.779661	0.371429	0.26616	2.39474	0.567164	0.130435	1.93176	1.50392	1.45906	1.39882	1.34594	1.70199	1.18229	1.14979	1.05565	1.28169	1.21692	1.20171	1.15613	1.54285	1.30819	1.27096
9.35971e-115	1.64974	0.781	0.448	3.15385e-110	cTEC	Agpat3	109.501	3.44423	0.710209	0.5	1.61046	0.3147	2.10826	1.68443	1.0513	0.327354	1.64789	0.966102	0.610714	0.43346	0.649123	1.01493	0.0434783	1.99157	1.34085	1.31427	1.67486	1.30963	1.44157	1.45784	1.46711	1.29669	1.65938	1.31342	1.28364	1.34422	1.14573	1.46296	1.06871
9.02044e-114	1.77398	0.688	0.22	3.03953e-109	cTEC	Hgsnat	108.517	2.24953	0.488474	0.196429	0.283305	0.245956	0.571429	0.759062	1.5114	0.0672646	0.28169	0.491525	0.392857	0.197719	0.5	0.567164	0.130435	1.78867	1.24828	1.15284	1.14769	1.24902	1.12695	1.22544	1.73173	1.06611	1.13324	1.17098	1.28852	1.13682	1.13168	1.2494	1.22458
4.91347e-113	1.08539	0.904	0.747	1.65564e-108	cTEC	Tmbim6	107.781	11.1361	5.10209	4.17857	7.71164	1.53901	8.88839	8.13774	4.93567	3.13453	3.82629	13.0678	2.88214	1.65019	6.86842	2.98507	1.82609	3.01756	2.57217	2.51253	2.89446	1.94463	2.30899	2.41323	2.44156	2.34048	2.22664	3.07073	1.97283	1.95275	2.18769	2.22451	2.73319
2.35778e-110	1.87716	0.692	0.298	7.94477e-106	cTEC	Egln2	105.1	2.36673	1.25027	0.415816	1.23609	0.227165	0.627232	0.357783	0.320847	0.255605	0.619718	1.18644	0.996429	0.178707	0.859649	0.537313	0.304348	1.74415	1.56307	1.25094	1.5204	1.20872	1.15387	1.10985	1.16787	1.2136	1.3169	1.37961	1.5729	1.16049	1.22139	1.27214	1.41012
9.95629e-110	1.3748	0.841	0.566	3.35487e-105	cTEC	Stmp1	104.474	4.51985	2.48738	0.691327	1.70826	0.878687	2.49665	2.51045	1.38599	0.659193	0.798122	2.20339	1.36429	0.775665	1.78947	2.02985	0.782609	2.24017	1.97167	1.41651	1.71702	1.58187	1.518	1.607	1.57957	1.41492	1.35768	1.56223	1.56902	1.51001	1.39902	1.7215	1.94204
2.12217e-108	2.0736	0.65	0.232	7.15086e-104	cTEC	Unc119	103.146	2.37618	1.8562	0.352041	0.913997	0.276879	0.392857	0.249893	0.140879	0.0538117	0.169014	0.440678	0.242857	0.174905	1.77193	0.104478	0.130435	1.73708	1.75774	1.23701	1.41769	1.20195	1.09115	1.06662	1.07467	1.03797	1.0756	1.14065	1.09258	1.10722	1.41758	1.04851	1.31732
2.29164e-106	2.13608	0.588	0.156	7.7219e-102	cTEC	Gucy1a2	101.112	2.05104	1.31614	0.0357143	0.209106	0.415557	0.322545	0.192751	0.0447883	0.0044843	0.28169	0.169492	0.121429	0.0114068	0.649123	0.925373	0	1.85537	1.61352	1.03447	1.10945	1.40128	1.09061	1.07297	1.0288	1.00555	1.16446	1.05603	1.05278	1.00645	1.16723	1.53614	1
1.04029e-105	2.7441	0.448	0.081	3.50537e-101	cTEC	Riiad1	100.455	1.45936	0.469813	0.0535714	0.185497	0.0406755	0.0870536	0.201279	0.325733	0.00896861	0.605634	0.0508475	0.0607143	0.0342205	0.236842	0.0597015	0	1.48538	1.23119	1.03691	1.08452	1.04572	1.048	1.072	1.17131	1.01602	1.26731	1.01448	1.0188	1.0178	1.05735	1.07312	1
3.40009e-105	2.64962	0.367	0.048	1.1457e-100	cTEC	Hic1	99.9409	0.570888	0.250274	0.0102041	0.0556492	0.0758801	0.0558036	0.00767591	0.00570033	0	0.00469484	0	0	0.0114068	0.0263158	0.432836	0.26087	1.22367	1.13155	1.00752	1.03238	1.05959	1.01594	1.00219	1.00467	1	1.00186	1	1	1.0171	1.00435	1.1883	1.36286
3.61246e-104	2.13849	0.58	0.161	1.21725e-99	cTEC	Kcnn3	98.9146	1.78828	0.189901	0.00765306	0.0370995	0.316841	1.17522	0.312154	0.0578176	0.0044843	0.276995	0.0338983	0.192857	0.0114068	0.0877193	0.149254	0.0434783	1.64882	1.09119	1.00349	1.0176	1.31189	1.26639	1.10984	1.03328	1.00333	1.17725	1.01876	1.05404	1.01212	1.02521	1.0427	1.07333
7.43303e-104	1.344	0.871	0.628	2.50464e-99	cTEC	Itm2c	98.6013	8.27599	6.95499	1.89286	7.72175	1.24334	2.94754	2.3113	1.49674	0.914798	2.80282	2.74576	1.2	0.764259	14.6754	3.52239	0.826087	2.73911	2.87411	1.89678	2.91948	1.82146	1.59196	1.5684	1.60604	1.58422	2.05677	1.73413	1.52679	1.43705	2.88994	2.20216	1.92474
9.79431e-102	2.39138	0.467	0.093	3.30029e-97	cTEC	Nkain4	96.4814	1.24575	0.524698	0.0153061	0.0252951	0.246194	0.209821	0.284435	0.00407166	0	0.0187793	0	0.00714286	0	0.122807	0.19403	0	1.47689	1.27604	1.01254	1.01304	1.16348	1.05028	1.07886	1.00192	1	1.00773	1	1.00232	1	1.02024	1.19707	1
3.26152e-101	1.6147	0.777	0.408	1.099e-96	cTEC	Tbc1d10a	95.959	3.0189	1.03403	0.428571	1.57167	0.585633	1.51786	0.64435	0.549674	0.237668	0.258216	1.33898	0.385714	0.254753	0.307018	0.791045	0.26087	1.93827	1.51147	1.33169	1.641	1.49024	1.32939	1.18793	1.30109	1.17752	1.13329	1.37993	1.16496	1.18936	1.07332	1.43056	1.33928
5.35377e-101	1.26983	0.786	0.323	1.80401e-96	cTEC	Lpar1	95.7438	3.22684	1.00329	0.19898	1.40472	1.16508	1.29911	0.363753	0.13355	0.0134529	0.0704225	0.0338983	0.114286	0.0228137	0.105263	1.68657	0	2.07556	1.51249	1.14925	1.72197	1.96626	1.33811	1.12757	1.07837	1.01807	1.04618	1.01172	1.04489	1.01136	1.02093	1.90153	1
7.45539e-101	1.67401	0.629	0.191	2.51217e-96	cTEC	Kitl	95.6	2.09452	1.56202	1.17092	0.58516	0.121551	0.665179	0.571429	0.65798	0.0807175	0.0516432	1.37288	0.0321429	0.0190114	0.0438596	1.41791	3.34783	1.70866	1.70039	1.61302	1.28244	1.13224	1.19351	1.19664	1.40803	1.05515	1.03631	1.32907	1.02031	1.01324	1.0078	1.86083	3.14409
1.01669e-100	2.37488	0.446	0.083	3.42583e-96	cTEC	Cracdl	95.4652	0.771267	0.21405	0.397959	0.212479	0.0889629	0.0747768	0.063113	0.0578176	0.0179372	0.746479	0.118644	0.1	0.0456274	0.280702	0	0	1.37154	1.11911	1.26291	1.11474	1.09494	1.0234	1.02757	1.03454	1.01269	1.34684	1.02581	1.0607	1.03835	1.10976	1	1
1.02708e-100	2.34681	0.499	0.11	3.46084e-96	cTEC	Map3k7cl	95.4608	1.68998	0.160263	0.0790816	0.435076	0.303045	0.0703125	0.191898	0.192182	0.00896861	0.0328638	0	0.025	0	0.0175439	0.328358	0	1.66386	1.08036	1.07532	1.23771	1.28786	1.02036	1.07054	1.11679	1.01603	1.01628	1	1.00746	1	1.00292	1.20517	1
1.55356e-100	1.45961	0.883	0.564	5.23486e-96	cTEC	Cyrib	95.2811	5.61248	3.58946	1.21429	1.58685	0.905566	2.36049	1.32921	0.79316	0.901345	1.69014	2.20339	2.23214	2.09886	1.07018	0.552239	0.173913	2.4566	2.30741	1.75607	1.64088	1.78649	1.51522	1.39098	1.43599	1.62761	1.69417	1.59274	2.02439	2.17537	1.34688	1.2793	1.33326
1.98013e-100	1.45733	0.837	0.451	6.67225e-96	cTEC	Gm20186	95.1757	6.04537	3.7618	2.39286	2.80944	0.926023	0.75558	0.733902	2.24756	0.636771	1.12207	8.59322	0.821429	0.581749	3.47368	0.671642	0.130435	2.48774	2.2645	2.10751	1.94509	1.79182	1.19054	1.25436	2.01138	1.55577	1.49707	2.57734	1.50228	1.36638	1.65462	1.2924	1.18131
2.22434e-99	1.39362	0.888	0.476	7.49515e-95	cTEC	Sh2d4b	94.1252	5.65028	0.367728	0.19898	0.448567	1.91318	2.63393	1.57271	1.52036	0.112108	0.596244	0.322034	0.339286	0.0874525	0.201754	0.0149254	0.0434783	2.69926	1.19071	1.1564	1.24025	2.45072	1.62948	1.53207	1.77098	1.09667	1.33784	1.09976	1.1828	1.07883	1.05532	1.0229	1.02566
8.33343e-99	1.55707	0.612	0.184	2.80803e-94	cTEC	Carmn	93.5516	1.61815	0.402854	0.0280612	0.146712	0.508088	0.199777	0.234115	0.198697	0.143498	0.0751174	0	0.075	0.0152091	0.0350877	0.41791	0	1.71444	1.22933	1.02316	1.09304	1.55387	1.07027	1.08968	1.15474	1.2301	1.04524	1	1.06812	1.00832	1.00632	1.20358	1
1.30072e-98	1.69211	0.786	0.409	4.38291e-94	cTEC	Cd274	93.3582	5.82798	0.925357	0.201531	1.1602	0.745005	1.93192	1.74115	1.8184	1.32287	1.52113	0.305085	0.739286	0.878327	0.0614035	0.0895522	0.0869565	2.39858	1.47543	1.15685	1.46285	1.67888	1.44395	1.51343	1.84301	1.89818	1.64399	1.12062	1.46001	1.4796	1.0133	1.0584	1.17714
4.73399e-98	1.96097	0.586	0.166	1.59516e-93	cTEC	1700019D03Rik	92.7972	2.17013	2.39517	0.196429	1.24958	0.201713	0.16183	0.176546	0.0741042	0.0986547	0.525822	1.57627	0.185714	0.0418251	0.157895	0.119403	0	1.72685	1.97519	1.14366	1.51063	1.17891	1.04033	1.05767	1.04478	1.12809	1.22266	1.45748	1.0613	1.0211	1.05101	1.07367	1
2.06768e-97	1.10675	0.907	0.699	6.96726e-93	cTEC	Slc25a4	92.1569	13.3195	7.35895	1.68112	9.95953	2.2324	22.0402	11.8861	2.18322	0.2287	2.97653	15.4746	3.33929	1.44867	6.20175	4.76119	1.78261	3.24923	2.89765	1.85723	3.21579	2.13957	3.17964	2.72302	1.731	1.17688	2.02628	3.17868	1.8448	1.8941	2.09338	2.52827	2.47608
3.95624e-97	2.27233	0.448	0.088	1.3331e-92	cTEC	Cth	91.8751	1.22306	0.427003	0.0102041	0.106239	0.0456708	0.261161	0.713859	0.0749186	0.00896861	0.0704225	0.0169492	0.0357143	0.00760456	0	0	0	1.411	1.19935	1.01047	1.04106	1.05879	1.05866	1.21271	1.06217	1.01326	1.04571	1.0091	1.01503	1.00995	1	1	1
1.78224e-96	2.04867	0.696	0.301	6.00545e-92	cTEC	Oma1	91.2215	3.78828	0.644347	0.316327	0.335582	0.215747	0.697545	2.39744	0.775244	0.161435	0.366197	0.389831	0.357143	0.163498	1.22807	0.164179	0.0869565	2.04172	1.33508	1.22247	1.17659	1.23106	1.17493	1.62792	1.37115	1.14113	1.18236	1.13719	1.21942	1.13753	1.25506	1.09671	1.14643
2.62671e-96	3.5459	0.291	0.028	8.85096e-92	cTEC	Adhfe1	91.053	0.508507	0.159166	0.0178571	0.0489039	0.0102284	0.03125	0.0430704	0.017101	0.0179372	0.0328638	0.152542	0.025	0	0.00877193	0.0149254	0	1.21217	1.08681	1.00961	1.02488	1.01261	1.00864	1.01496	1.01783	1.00375	1.01711	1.05056	1.01705	1	1.00143	1.01219	1
3.80875e-96	1.37988	0.913	0.627	1.2834e-91	cTEC	Psmb10	90.8916	12.0737	2.51811	1.5	1.05396	1.13844	17.6172	14.3527	5.1873	1.70852	2.26291	1.9322	0.964286	0.73384	0.894737	1.91045	0.869565	3.20681	1.98394	1.81931	1.57529	1.73141	2.95107	2.9675	2.44586	1.80621	1.8131	1.62326	1.43533	1.45528	1.17261	1.81275	2.11424
1.37889e-95	1.63944	0.694	0.25	4.64631e-91	cTEC	Plekha7	90.3329	2.01701	0.850714	0.441327	0.252951	0.532826	0.347098	0.173134	0.34202	0.224215	0.596244	0.491525	0.460714	0.307985	0.491228	0.0298507	0.217391	1.87303	1.42854	1.31181	1.13167	1.57267	1.12213	1.0698	1.22424	1.205	1.34611	1.17738	1.33952	1.23057	1.17092	1.00712	1.26349
1.98623e-95	1.3634	0.845	0.409	6.69279e-91	cTEC	Limch1	90.1744	4.67297	2.93963	0.420918	1.07083	1.59015	0.649554	0.643923	0.302932	0.188341	1.73709	12.8136	0.403571	0.0494297	2.16667	0.656716	0.478261	2.47833	2.10466	1.27423	1.43931	2.231	1.17698	1.2416	1.17092	1.22587	1.7276	3.0253	1.21306	1.04211	1.51718	1.48873	1.62153
2.49896e-95	3.85962	0.295	0.033	8.42048e-91	cTEC	Gm29481	90.0747	0.748582	0.0153677	0.0102041	0.0185497	0.0287821	0.0446429	0.101919	0.0390879	0.0044843	0	0.0677966	0.00357143	0	0.0263158	0	0	1.35238	1.0068	1.00777	1.01212	1.03906	1.00927	1.03792	1.03195	1.00652	1	1.01606	1.00426	1	1.00432	1	1
3.26115e-95	1.71466	0.546	0.146	1.09888e-90	cTEC	Mdga1	89.9591	1.4121	1.58836	0.0688776	0.487352	0.224072	0.104911	0.163753	0.0651466	0.0224215	0.159624	0	0.189286	0.0304183	0.0701754	0.0895522	0	1.56393	1.74739	1.06345	1.26008	1.24607	1.02944	1.05833	1.04355	1.00991	1.09788	1	1.06508	1.01898	1.01462	1.04585	1
3.12577e-93	1.77579	0.628	0.208	1.05326e-88	cTEC	Cpt1a	87.9775	1.5104	0.69045	0.410714	0.504216	0.223834	0.228795	0.221748	0.22557	0.152466	0.286385	0.728814	0.278571	0.292776	0.447368	0.522388	0.173913	1.57624	1.36413	1.28524	1.2461	1.23764	1.06353	1.07849	1.14773	1.17022	1.13765	1.2168	1.17548	1.26119	1.1258	1.37671	1.25266
6.89104e-93	3.99642	0.27	0.024	2.322e-88	cTEC	Sptssb	87.6341	1.48204	0.203074	0.0178571	0.436762	0.00261656	0.0279018	0.0469083	0.160423	0.0044843	0.0187793	0.288136	0	0.0190114	0.0438596	0	0	1.44489	1.09172	1.01349	1.17644	1.00355	1.00735	1.01393	1.09219	1.00299	1.00773	1.087	1	1.01182	1.00889	1	1
9.73688e-93	1.5757	0.733	0.43	3.28094e-88	cTEC	Ppa1	87.484	4.21928	1.40834	0.691327	2.91568	0.510228	4.21987	1.81493	0.680782	0.0986547	0.492958	2.59322	0.578571	0.51711	1.99123	0.656716	0.26087	2.09202	1.59877	1.39827	1.98861	1.37361	1.75707	1.458	1.34602	1.06721	1.20826	1.66763	1.20256	1.2647	1.4565	1.32732	1.4077
1.16328e-92	1.84688	0.493	0.118	3.91979e-88	cTEC	Atp8a2	87.4067	1.11153	0.234907	0.0178571	0.242833	0.161989	0.164062	0.234115	0.208469	0.0852018	1.43662	0	0.0607143	0.0342205	0.236842	0.0597015	0	1.45791	1.11354	1.016	1.11382	1.19791	1.05633	1.10459	1.12607	1.11768	1.65347	1	1.03021	1.02773	1.07434	1.02415	1
7.6042e-92	3.41989	0.308	0.036	2.56231e-87	cTEC	Hs3st6	86.5914	0.882798	0.182217	0.0280612	0.220911	0.0168887	0.0189732	0.163753	0.02443	0	0.117371	0.305085	0.0357143	0	0.0526316	0	0	1.309	1.09165	1.02297	1.08716	1.01311	1.0037	1.05424	1.01672	1	1.06257	1.10846	1.00636	1	1.01288	1	1
2.53557e-91	1.90243	0.575	0.17	8.54385e-87	cTEC	Nin	86.0683	1.50851	0.593853	0.859694	0.313659	0.201475	0.3125	0.0938166	0.0610749	0.0941704	0.323944	1.9322	0.303571	0.859316	0.403509	0.373134	0.173913	1.60536	1.30876	1.51396	1.14701	1.24148	1.09328	1.03501	1.0424	1.11408	1.15833	1.53469	1.1609	1.66528	1.12463	1.2084	1.2029
5.11286e-91	3.20241	0.352	0.063	1.72283e-86	cTEC	Gchfr	85.7638	1.55388	0.0164654	0.0535714	0.29511	0.00547098	0.0524554	0.545416	0.336319	0.0672646	0.0516432	0.152542	0.1	0.0228137	0.368421	0	0	1.50953	1.0069	1.03643	1.12835	1.00682	1.01322	1.16161	1.15307	1.03206	1.01873	1.04272	1.04951	1.01836	1.10215	1	1
7.60006e-91	1.94692	0.739	0.486	2.56092e-86	cTEC	Cbr2	85.5916	10.8185	4.53568	5.73214	2.38449	1.08325	2.44308	2.26354	3.06596	0.130045	0.150235	19.2203	0.264286	0.212928	4.5614	0.19403	0.0434783	3.06818	2.53878	2.93324	1.93866	1.7738	1.53311	1.54448	2.13825	1.1128	1.0673	3.53447	1.14152	1.12119	1.89678	1.08954	1.05222
4.23197e-90	1.21377	0.839	0.573	1.42601e-85	cTEC	Smim14	84.8459	4.41399	2.49396	1.91582	2.5683	0.742626	1.6875	1.61109	1.41287	0.744395	2.64789	3.77966	1.4	0.996198	1.99123	2.10448	0.695652	2.18189	1.9729	1.8929	1.94715	1.59478	1.37532	1.4497	1.6158	1.53151	1.93679	1.93032	1.60138	1.71076	1.49701	1.88745	1.73422
5.50787e-90	1.67572	0.701	0.291	1.85593e-85	cTEC	Ache	84.7314	2.07183	0.0526894	0.0408163	0.0354132	0.118459	1.05692	2.65586	1.03583	0.264574	0.441315	0.0169492	0.135714	0.0228137	0.526316	0	0	1.78998	1.02703	1.03422	1.01694	1.11907	1.25442	1.70791	1.51074	1.31448	1.21168	1.01187	1.08405	1.02277	1.1632	1	1
6.86692e-90	1.77767	0.452	0.101	2.31388e-85	cTEC	Fmo1	84.6357	1.0397	0.901207	0.102041	0.602024	0.111085	0.0446429	0.248188	0.0635179	0.00896861	0.0187793	0.186441	0.0178571	0.00380228	0.105263	0.477612	0.695652	1.37338	1.41996	1.05707	1.32714	1.10218	1.01643	1.09614	1.0307	1.01258	1.00623	1.04693	1.01075	1.00215	1.01736	1.24363	1.82914
1.09915e-89	3.20922	0.319	0.041	3.7037e-85	cTEC	Plekhb1	84.4314	0.99811	0.117453	0.0331633	1.01349	0.0135585	0.0390625	0.0247335	0.014658	0.00896861	0.0328638	0.0508475	0.0321429	0.0190114	0.368421	0.164179	0.0434783	1.34885	1.06314	1.01519	1.42112	1.01585	1.01121	1.00766	1.00892	1.00353	1.01868	1.01063	1.02658	1.01415	1.09076	1.20571	1.08296
1.27045e-89	2.39474	0.456	0.101	4.2809e-85	cTEC	Mitf	84.3685	1.0586	0.435785	0.22449	0.126476	0.144862	0.135045	0.115565	0.0830619	0.0627803	0.122066	0.457627	0.121429	0.178707	0.763158	0.850746	0	1.53199	1.23316	1.17862	1.0686	1.16884	1.03433	1.0407	1.05365	1.07717	1.05346	1.16518	1.05944	1.12156	1.22564	1.4418	1
2.79827e-89	2.4453	0.454	0.102	9.42904e-85	cTEC	Mmp2	84.0255	1.66163	0.545554	0.0994898	0.428331	0.155566	0.0334821	0.0712154	0.0529316	0	0.0328638	0.0338983	0.0392857	0.0380228	0.114035	3.8806	0	1.53596	1.29899	1.07885	1.21778	1.15589	1.00855	1.02251	1.03361	1	1.01233	1.01112	1.0116	1.0329	1.0192	2.18942	1
2.82986e-89	1.62791	0.715	0.342	9.5355e-85	cTEC	Lancl1	84.0207	2.27032	0.919868	0.341837	0.514334	0.37274	1.25446	0.887846	0.259772	0.0896861	0.314554	0.423729	0.507143	0.277567	7.46491	0.447761	0.0434783	1.75687	1.43078	1.259	1.25178	1.32403	1.27431	1.24229	1.14618	1.09164	1.15342	1.15879	1.18247	1.26905	2.36382	1.179	1.04746
1.24121e-88	1.17888	0.837	0.611	4.18239e-84	cTEC	Pebp1	83.3786	6.60302	4.16465	1.8801	5.48229	1.14415	6.95536	2.78209	0.783388	0.318386	2.61502	7.25424	3.95714	1.90494	9.2807	3.47761	0.782609	2.48013	2.35314	1.89331	2.58284	1.69519	2.10371	1.62947	1.3429	1.2047	1.95807	2.39691	1.93687	1.99797	2.44421	2.30983	1.76852
1.27785e-88	2.43152	0.367	0.06	4.30584e-84	cTEC	Mapk15	83.3659	0.654064	0.154775	0.0357143	0.0910624	0.0823026	0.0524554	0.0264392	0.0423453	0.00896861	1.12207	0.0847458	0.0285714	0.0114068	0.210526	0	0	1.27076	1.08786	1.02406	1.03982	1.07536	1.0152	1.01264	1.03251	1.0048	1.4619	1.02727	1.01164	1.00874	1.04347	1	1
3.49579e-88	1.30669	0.724	0.293	1.17794e-83	cTEC	Xrcc5	82.9289	2.03592	1.0494	0.719388	0.865093	0.505233	0.660714	0.390192	0.0879479	0.0672646	0.375587	0.576271	0.289286	0.163498	0.736842	0.238806	0	1.69753	1.49857	1.45416	1.4045	1.50413	1.15301	1.12879	1.05948	1.05819	1.24456	1.17259	1.114	1.13468	1.21497	1.1441	1
4.13703e-88	1.55723	0.667	0.245	1.39401e-83	cTEC	Ralgps2	82.8557	1.67486	0.691548	0.321429	0.367622	0.295909	0.436384	0.275906	0.439739	0.0313901	1.06573	1.0678	0.982143	1.15209	0.403509	0.0746269	0	1.67907	1.35947	1.24215	1.16427	1.31005	1.13059	1.1146	1.28811	1.01609	1.44119	1.30424	1.45814	1.95647	1.12629	1.03775	1
4.3729e-88	1.28728	0.802	0.505	1.47349e-83	cTEC	Dynll2	82.8317	4.00378	1.85181	0.586735	2.1973	0.611798	3.17188	1.51087	0.948697	0.61435	3.57746	3.49153	1.69643	0.794677	2.60526	0.910448	0.217391	2.07077	1.76158	1.35562	1.81082	1.47496	1.62175	1.41933	1.45789	1.40661	2.20916	1.81749	1.59279	1.63238	1.57229	1.42914	1.30609
1.87584e-87	2.60306	0.386	0.07	6.32083e-83	cTEC	Dll4	82.1992	0.833648	0.0153677	0.0102041	0.0185497	0.0273549	0.210938	0.292964	0.259772	0.0672646	0.347418	0.169492	0.0535714	0.0152091	0.0526316	0.0149254	0.26087	1.33968	1.01003	1.00934	1.00629	1.03317	1.06995	1.09904	1.14797	1.06632	1.19893	1.04186	1.0652	1.01383	1.01202	1.01044	1.21537
1.76533e-86	1.48503	0.737	0.322	5.94847e-82	cTEC	Gm56730	81.2256	2.70321	1.2865	0.410714	1.07083	0.478592	0.305804	0.504051	1.01547	0.64574	0.319249	1.20339	0.321429	0.34981	0.719298	0.820896	1.65217	1.88232	1.57604	1.27163	1.47685	1.45609	1.08452	1.17585	1.54793	1.55263	1.15888	1.36481	1.19886	1.24122	1.20226	1.36954	2.47534
6.09882e-86	1.12565	0.911	0.569	2.05506e-81	cTEC	Mreg	80.6872	5.58979	0.739846	0.295918	0.694772	1.02212	4.11496	4.64861	3.19707	1.93274	2.60563	0.576271	0.753571	0.798479	0.201754	0.0746269	0	2.51095	1.37306	1.23896	1.31733	1.95521	1.77471	2.06769	2.2491	2.15881	2.0621	1.21396	1.37896	1.3854	1.0664	1.04071	1
6.24573e-86	1.80923	0.459	0.111	2.10456e-81	cTEC	Wscd1	80.6768	1.09263	1.2876	0.0178571	0.247892	0.186489	0.0803571	0.0443497	0.0138436	0.0044843	0.0375587	0.0338983	0.0321429	0.0114068	0.114035	0	0.0434783	1.40636	1.57251	1.0187	1.13007	1.17181	1.02203	1.0169	1.01136	1.01125	1.01748	1.00912	1.00893	1.0088	1.03257	1	1.05222
1.2045e-84	2.86356	0.312	0.041	4.05869e-80	cTEC	Cdr2l	79.3916	0.47259	0.0428101	0.0127551	0.06914	0.0387726	0.185268	0.0533049	0.0203583	0.0044843	0.0516432	0.0508475	0.0607143	0.00380228	0.0877193	0.477612	0	1.20523	1.0231	1.01509	1.02908	1.04082	1.04701	1.01827	1.01325	1.00651	1.03401	1.01845	1.03231	1.00778	1.01638	1.21501	1
2.60155e-83	2.26005	0.359	0.062	8.7662e-79	cTEC	Aldh1l1	78.0572	0.593573	0.184413	0.0663265	0.0539629	0.0539962	0.0546875	0.157783	0.0627036	0.0717489	0.159624	0.728814	0.0428571	0.0228137	0.22807	0.0298507	0	1.24908	1.09867	1.04799	1.03088	1.06956	1.01338	1.05179	1.0338	1.07667	1.07502	1.25835	1.01176	1.01371	1.0584	1.01028	1
3.7639e-83	1.47147	0.794	0.4	1.26828e-78	cTEC	Hpgd	77.8968	12.9868	8.01647	1.25765	4.41147	4.20076	0.801339	0.254584	0.605863	0.340807	4.16901	0.305085	0.525	0.136882	0.289474	0.104478	0	3.28579	3.05336	1.84336	2.45045	2.89107	1.20624	1.0861	1.27329	1.25045	2.18577	1.13202	1.16575	1.08863	1.06377	1.03747	1
6.09184e-83	1.57009	0.469	0.12	2.05271e-78	cTEC	Rassf5	77.6877	0.850662	0.335895	0.0969388	0.121417	0.167222	0.110491	0.0950959	0.199511	0.058296	0.13615	0.457627	0.05	0.387833	0.0877193	0.119403	0	1.35653	1.1819	1.07916	1.07045	1.20387	1.03499	1.04297	1.13289	1.05076	1.05731	1.15066	1.02993	1.29811	1.03322	1.05722	1
1.38347e-82	2.20381	0.367	0.067	4.66175e-78	cTEC	Scn1b	77.3315	0.669187	0.343578	0.260204	0.320405	0.0592293	0.0223214	0.0315565	0.0643322	0.0044843	0.0516432	0.101695	0.0107143	0.0190114	0.175439	0.880597	0.434783	1.2679	1.18498	1.15176	1.16673	1.06062	1.00599	1.00963	1.04283	1.00146	1.02212	1.03869	1.00364	1.01025	1.05602	1.48687	1.44662
1.84178e-82	1.45911	0.741	0.355	6.20605e-78	cTEC	Slc29a1	77.2072	3.03781	1.46762	0.267857	0.637437	0.887488	2.76674	0.399147	0.150651	0.0493274	0.619718	0.220339	0.289286	0.342205	0.324561	2.13433	0.521739	1.93542	1.63906	1.20595	1.32569	1.62976	1.56823	1.11862	1.07975	1.06186	1.33207	1.08992	1.10706	1.22117	1.07026	1.7843	1.65374
2.42481e-82	2.69521	0.391	0.092	8.17063e-78	cTEC	Slc22a7	77.0877	1.56711	0.00768386	0.00765306	0.0185497	0.0123692	0.195312	1.07505	0.576547	0.00896861	0.0140845	0	0.0142857	0.00760456	0.140351	0	0	1.56601	1.00519	1.00341	1.01151	1.01106	1.05289	1.3042	1.26087	1.01426	1.01188	1	1.00641	1.00926	1.02304	1	1
3.63381e-82	1.5951	0.382	0.08	1.22445e-77	cTEC	Scn1a	76.9121	1.60113	3.78705	0.0178571	0.418212	0.05804	0.00446429	0.0584222	0.000814332	0	0.028169	0	0	0.0190114	0.0438596	0.0895522	0	1.53893	2.38556	1.01898	1.20702	1.05501	1.00149	1.02171	1.00024	1	1.00969	1	1	1.01302	1.01911	1.05124	1
5.79832e-82	3.62583	0.251	0.024	1.9538e-77	cTEC	Neurl2	76.7091	0.410208	0.0482986	0.0102041	0.0236088	0.0309229	0.0256696	0.0289979	0.00814332	0	0.00938967	0	0.0357143	0.00760456	0.0438596	0	0.0434783	1.25563	1.02666	1.00985	1.0139	1.04041	1.00884	1.01269	1.00915	1	1.00658	1	1.01634	1.00455	1.00966	1	1.07604
9.92062e-82	1.26674	0.866	0.617	3.34285e-77	cTEC	S100a10	76.4759	13.9679	11.0944	4.38265	9.94941	2.77498	4.38616	3.42687	3.29072	2.73991	0.99061	14.339	0.625	2.1749	1.89474	7.38806	2.04348	3.25832	3.39257	2.64732	3.27448	2.34208	1.86164	1.80822	2.05865	2.39648	1.38182	3.1562	1.28237	2.22305	1.41695	2.9052	2.70887
5.41352e-81	1.27868	0.813	0.501	1.82414e-76	cTEC	Hmg20b	75.7389	3.05293	0.849616	0.757653	1.01518	0.510704	2.42076	1.53006	1.17182	0.717489	0.694836	2.20339	1.01429	0.513308	1.61404	0.716418	0.695652	1.94171	1.39138	1.46196	1.48041	1.46378	1.5139	1.41093	1.58627	1.54766	1.32022	1.61801	1.42062	1.44962	1.40149	1.40708	1.83177
7.78069e-81	1.46508	0.662	0.255	2.62178e-76	cTEC	Stard5	75.5814	2.39887	1.15038	0.494898	0.962901	0.444339	0.204241	0.189765	0.264658	0.0986547	0.985915	1.0678	1.28571	0.235741	0.140351	0.328358	0.0869565	1.75196	1.55015	1.36966	1.42666	1.44737	1.05499	1.06847	1.19947	1.1016	1.46335	1.28253	1.67294	1.20502	1.04423	1.15071	1.13176
1.57623e-80	1.64958	0.66	0.298	5.31127e-76	cTEC	Hsdl2	75.2748	2.05671	1.31833	0.278061	1.22597	0.276166	0.595982	0.479318	0.286645	0.125561	0.333333	1.0339	0.389286	0.429658	0.780702	0.38806	0.130435	1.66129	1.57678	1.2172	1.48364	1.24561	1.13696	1.13351	1.15398	1.07848	1.1734	1.31748	1.16393	1.39146	1.21271	1.32596	1.25024
1.91003e-80	1.66397	0.62	0.228	6.43604e-76	cTEC	Ltbr	75.1914	1.28166	0.574094	0.436224	0.681282	0.222883	0.335938	0.200853	0.281759	0.269058	0.286385	0.881356	0.275	0.0342205	0.482456	0.895522	0.173913	1.50533	1.29128	1.29636	1.33017	1.21333	1.08803	1.06092	1.16349	1.24927	1.14017	1.29332	1.12913	1.01941	1.12975	1.42915	1.28489
4.24122e-80	1.21145	0.936	0.671	1.42912e-75	cTEC	Nav2	74.8449	10.6522	2.88474	2.45663	2.22091	3.3128	2.52455	2.06652	1.47068	1.18834	4.34272	2.64407	4.57857	0.551331	1.2807	0.492537	0.26087	3.33556	2.10227	2.23587	1.94141	3.12244	1.64711	1.66874	1.86793	1.97461	2.44943	1.6775	2.83791	1.57524	1.318	1.35232	1.32285
4.34409e-80	2.30567	0.435	0.105	1.46378e-75	cTEC	Gm43672	74.8345	1.12476	0.36663	0.173469	0.748735	0.0920552	0.180804	0.0682303	0.110749	0.0179372	0.0469484	0.0508475	0.0857143	0.0570342	0.0877193	0.0746269	0	1.38363	1.17732	1.11895	1.3342	1.09036	1.04145	1.02327	1.07016	1.01872	1.02601	1.01737	1.04077	1.0341	1.02134	1.02934	1
4.94821e-80	2.40804	0.359	0.065	1.66735e-75	cTEC	A430018G15Rik	74.778	0.568998	0.397366	0.0841837	0.278246	0.0340152	0.0245536	0.0396588	0.0162866	0.00896861	0.0657277	0.237288	0.153571	0.0228137	0.429825	0.104478	0.0869565	1.22739	1.21417	1.05555	1.13284	1.02866	1.00605	1.01194	1.01179	1.0139	1.03342	1.0834	1.10549	1.01215	1.10023	1.0335	1.09341
5.45098e-80	3.43301	0.287	0.041	1.83676e-75	cTEC	Ankmy1	74.7359	0.567108	0.0417124	0.0102041	0.0337268	0.0283064	0.112723	0.0814499	0.0472313	0.0224215	0.0375587	0.0338983	0.025	0.0152091	0.0438596	0.0746269	0	1.26694	1.0294	1.00559	1.02154	1.02909	1.02875	1.031	1.02857	1.01752	1.01506	1.01045	1.01466	1.01171	1.008	1.07174	1
7.37045e-80	1.73354	0.618	0.245	2.48355e-75	cTEC	Carhsp1	74.6049	1.81664	0.671789	0.295918	0.866779	0.316127	0.985491	0.199147	0.200326	0.103139	0.314554	2	0.878571	0.292776	0.736842	0.835821	0.304348	1.60498	1.33111	1.17201	1.36967	1.25113	1.23394	1.06484	1.12312	1.09136	1.14447	1.52109	1.32636	1.21068	1.17515	1.46057	1.3348
9.33308e-80	1.37027	0.575	0.193	3.14488e-75	cTEC	Pgm5	74.5024	1.49338	1.12404	0.816327	0.814503	0.457422	0.229911	0.147122	0.0757329	0.0896861	0.0704225	0.491525	0.1	0.026616	0.0438596	0.0298507	0	1.64392	1.57915	1.59762	1.40488	1.44239	1.07845	1.06124	1.04203	1.07932	1.03096	1.15729	1.02476	1.01839	1.00998	1.02117	1
3.04341e-79	2.84979	0.299	0.041	1.02551e-74	cTEC	Spon2	73.9891	1.03781	0.591658	0.0153061	0.423272	0.0335395	0.0345982	0.034968	0.002443	0.0224215	0.187793	0.0169492	0.0142857	0.00760456	0.00877193	0.537313	0	1.33472	1.28335	1.0126	1.20151	1.02512	1.01044	1.01298	1.00131	1.02935	1.10706	1.00611	1.00469	1.01205	1.00198	1.232	1
9.50258e-79	1.17317	0.739	0.328	3.20199e-74	cTEC	Tulp3	73.4946	2.17391	1.39078	0.47449	0.81113	0.684586	0.667411	0.417484	0.272801	0.0358744	0.323944	0.474576	0.292857	0.0494297	0.280702	0.656716	0.173913	1.82077	1.65246	1.34197	1.39028	1.68559	1.18471	1.13924	1.20394	1.01685	1.14312	1.18694	1.16081	1.05478	1.07807	1.35526	1.17633
1.44331e-78	1.10831	0.705	0.299	4.86338e-74	cTEC	Tenm4	73.3131	3.21928	0.97146	0.517857	2.08769	1.30281	0.291295	0.406397	0.37785	0.0313901	0.41784	0.491525	0.864286	0.0608365	0.815789	0.41791	0	2.18002	1.47647	1.37498	1.8637	2.16053	1.11854	1.18922	1.24385	1.05072	1.1851	1.14048	1.33553	1.03186	1.29517	1.14134	1
1.98397e-78	1.35926	0.758	0.458	6.6852e-74	cTEC	Cltb	73.1749	3.01323	1.49396	1.46173	1.83305	0.461227	1.9375	0.909168	1.26873	0.502242	1.42254	1.84746	1.46786	0.319392	1.80702	1.19403	0.913043	1.93458	1.66773	1.79267	1.75218	1.35492	1.39075	1.2471	1.57374	1.27789	1.59181	1.55095	1.63393	1.24316	1.43092	1.60908	1.9272
4.31237e-78	1.68399	0.633	0.282	1.4531e-73	cTEC	Enpp5	72.8377	1.72023	1.07794	0.57398	0.973019	0.19981	0.658482	0.453305	0.337948	0.152466	0.56338	2.57627	0.571429	0.0380228	1.13158	0.41791	0.217391	1.58732	1.50266	1.32569	1.42499	1.15755	1.15774	1.13184	1.1605	1.11785	1.28038	1.70351	1.2971	1.01931	1.27049	1.258	1.24624
8.42599e-78	1.70387	0.616	0.278	2.83922e-73	cTEC	Abhd14b	72.5468	1.69565	0.815587	0.410714	1.20236	0.109895	0.526786	0.588913	0.613192	0.121076	0.57277	1.05085	0.460714	0.0456274	1.02632	0.358209	0.0869565	1.56292	1.39694	1.24854	1.50774	1.09662	1.12238	1.16827	1.30017	1.10736	1.27407	1.35197	1.2519	1.03215	1.24792	1.29399	1.1371
1.38844e-77	1.1508	0.824	0.556	4.67847e-73	cTEC	Pdlim1	72.3299	4.90926	2.39846	1.8801	1.9511	0.948382	3.07254	2.18763	1.71173	0.762332	1.70892	1.30508	0.464286	0.764259	0.0526316	1.22388	0.956522	2.2332	1.9322	1.91313	1.79355	1.72681	1.58586	1.55253	1.72095	1.60192	1.67539	1.41293	1.22907	1.50715	1.00876	1.67096	2.14027
3.61865e-77	1.17157	0.9	0.572	1.21934e-72	cTEC	Alcam	71.9139	8.52363	3.88364	9.55612	1.77572	1.17555	2.2221	4.45757	5.53583	1.17489	17.7465	11.3559	3.95714	1.05323	1.98246	0.38806	0	3.02649	2.34049	3.47463	1.7603	1.95777	1.55446	2.16267	2.66695	1.85896	4.00781	2.92652	2.51895	1.55868	1.54526	1.46195	1
2.90124e-76	1.61479	0.716	0.335	9.77602e-72	cTEC	Arhgef10l	71.0098	2.36862	0.219539	0.612245	0.219224	0.270695	0.467634	1.10362	1.96498	0.704036	1.17371	1.16949	0.521429	0.190114	0.5	0.328358	0.0434783	2.00738	1.12942	1.41903	1.11763	1.35745	1.14187	1.38191	2.02802	1.59699	1.54331	1.38783	1.38468	1.13692	1.19005	1.19281	1.14474
3.2961e-76	1.90483	0.541	0.183	1.11065e-71	cTEC	Calcoco1	70.9544	1.50473	0.558727	0.288265	0.408094	0.199334	0.184152	0.163753	0.136808	0.044843	0.253521	0.542373	0.292857	0.163498	0.535088	0.268657	0.0869565	1.50917	1.28765	1.20066	1.20596	1.21544	1.04617	1.05086	1.093	1.04773	1.11317	1.16119	1.12301	1.18746	1.13698	1.17223	1.09802
4.42498e-76	1.26985	0.527	0.173	1.49104e-71	cTEC	Tgfbr2	70.8265	1.06805	0.97146	1.2449	0.300169	0.253092	0.0747768	0.0204691	0.0895765	0.116592	0.028169	0.322034	0.0321429	0.714829	0.263158	2.8806	0.608696	1.469	1.46936	1.70719	1.16835	1.27264	1.02471	1.00943	1.06957	1.10468	1.01614	1.11083	1.01538	1.57693	1.07669	2.06281	1.63179
5.15698e-76	1.50766	0.365	0.081	1.7377e-71	cTEC	Ccdc68	70.76	0.58034	0.399561	0.40051	0.23946	0.0908658	0.00558036	0.0537313	0.0439739	0.0941704	0.164319	0.610169	0.0178571	0.00760456	0.114035	0.134328	0	1.22044	1.21565	1.26322	1.12178	1.10303	1.00278	1.02006	1.02063	1.07778	1.09012	1.22392	1.01146	1.00218	1.03961	1.13031	1
2.32417e-75	1.31834	0.732	0.42	7.83151e-71	cTEC	Hadh	70.1062	2.73724	1.11965	0.484694	1.77403	0.345861	1.92857	1.15309	1.0798	1.26457	2.52113	1.22034	0.492857	0.307985	1.39474	0.895522	0.521739	1.80228	1.51062	1.31033	1.70963	1.27181	1.38852	1.28499	1.48891	1.7252	1.94294	1.33909	1.17448	1.21875	1.31457	1.56303	1.78721
3.81578e-75	2.14259	0.374	0.077	1.28577e-70	cTEC	Enpep	69.8908	0.858223	0.334797	0.806122	0.315346	0.0594672	0.0323661	0.239659	0.0472313	0.345291	0.117371	0.118644	0.0464286	0.00760456	0.0877193	0.253731	0.26087	1.37193	1.1789	1.43264	1.18572	1.07018	1.00976	1.07628	1.02587	1.30488	1.06855	1.04107	1.02434	1.00535	1.03237	1.12977	1.30784
1.01172e-74	1.53856	0.705	0.356	3.40909e-70	cTEC	Bhlhe41	69.4674	3.12098	0.530187	0.119898	0.564924	0.9196	1.55804	0.647335	0.970684	0.197309	0.910798	0.355932	0.396429	0.0228137	0.298246	0.208955	0.0434783	2.01347	1.27229	1.09499	1.30322	1.68513	1.36068	1.19991	1.48488	1.10814	1.38316	1.12463	1.19324	1.01356	1.06981	1.09688	1.08049
1.9963e-74	1.73895	0.539	0.177	6.72674e-70	cTEC	2010004M13Rik	69.1722	1.5293	0.534577	0.181122	0.644182	0.190533	0.363839	0.141578	0.233713	0.156951	0.42723	1.18644	0.467857	0.121673	0.245614	0.253731	0.0434783	1.49004	1.27009	1.15175	1.27489	1.20069	1.08619	1.04347	1.16966	1.18034	1.21264	1.37166	1.25058	1.11093	1.06472	1.19969	1.05222
3.61888e-74	1.62816	0.711	0.349	1.21942e-69	cTEC	Nlgn1	68.9138	8.8034	3.28321	0.0637755	0.241147	1.72883	3.21763	1.79275	1.77199	0.798206	13.2066	0.254237	0.332143	0.117871	1.11404	0.238806	0	2.99678	2.2428	1.05352	1.14464	2.27591	1.71267	1.63459	1.88563	1.52508	3.55165	1.13592	1.15294	1.0935	1.31779	1.16059	1
1.17971e-73	3.1896	0.265	0.033	3.97514e-69	cTEC	Slco2b1	68.4006	0.557656	0.0428101	0.00255102	0.0168634	0.0568506	0.0200893	0.130917	0.0187296	0	0	0	0	0.00380228	0.0964912	0.925373	0.478261	1.3044	1.02186	1.00085	1.01739	1.05641	1.00457	1.04175	1.01037	1	1	1	1	1.00339	1.02386	1.39506	1.5926
1.23291e-73	3.09977	0.316	0.054	4.15442e-69	cTEC	Aox2	68.3815	1.94707	0.895719	0.0841837	0.650927	0.0168887	0.0178571	0.382942	0.29316	0.0358744	0.00938967	0.0508475	0.0571429	0.0152091	0.0175439	0	0	1.74059	1.4354	1.06852	1.23944	1.025	1.00436	1.11829	1.19996	1.02947	1.00531	1.01342	1.05493	1.00932	1.00452	1	1
1.89906e-73	1.06727	0.803	0.407	6.39907e-69	cTEC	Igfbp5	68.1939	12.8885	17.0527	1.24745	4.77403	5.53473	0.850446	0.347548	0.359121	0.0941704	16.9859	3.37288	7.27857	0.114068	0.578947	5.55224	0.304348	3.44561	3.90141	1.73615	2.5237	3.20706	1.26053	1.13666	1.22144	1.09394	3.72855	1.81439	2.52177	1.10133	1.10875	2.79403	1.41089
4.40117e-73	1.67518	0.497	0.149	1.48302e-68	cTEC	Sord	67.8289	1.25709	1.02854	0.122449	0.748735	0.119886	0.116071	0.211514	0.109935	0.318386	0.0234742	0.152542	0.0214286	0.159696	0.921053	0.298507	0.0434783	1.40283	1.4801	1.10062	1.35312	1.11534	1.03101	1.06167	1.07676	1.26691	1.00942	1.04171	1.00983	1.12394	1.22977	1.16107	1.08049
5.39302e-73	1.25812	0.609	0.229	1.81723e-68	cTEC	Osbpl6	67.7406	2.0397	0.745335	0.803571	0.812816	0.618221	0.243304	0.141578	0.137622	0.174888	0.408451	2.11864	0.578571	0.0152091	0.614035	0.119403	0	1.73459	1.39263	1.49511	1.41318	1.61746	1.08216	1.06293	1.08352	1.15167	1.21345	1.55749	1.26736	1.00474	1.21017	1.04979	1
5.75512e-73	1.4414	0.684	0.334	1.93924e-68	cTEC	Mrpl3	67.7124	2.09074	1.8079	0.331633	1.30523	0.242626	1.62835	0.71258	0.280945	0.143498	0.516432	0.610169	0.45	0.338403	0.666667	0.432836	0.26087	1.67448	1.75465	1.21978	1.56981	1.22143	1.34359	1.20631	1.13875	1.18226	1.22591	1.18171	1.18934	1.25171	1.16361	1.22934	1.35298
6.1424e-73	2.1356	0.335	0.064	2.06974e-68	cTEC	Scarf2	67.6841	0.540643	0.525796	0.0357143	0.11973	0.0696955	0.0111607	0.00682303	0.00488599	0	0.0140845	0.0169492	0.0357143	0.0114068	0.0438596	1.13433	0	1.23554	1.28247	1.02623	1.07878	1.06661	1.00266	1.00243	1.00353	1	1.00957	1.0042	1.02597	1.00874	1.00723	1.45941	1
1.02983e-72	1.30702	0.352	0.078	3.47011e-68	cTEC	Gm47123	67.4597	0.621928	0.12404	0.0816327	0.06914	0.228116	0.146205	0.0801706	0.0260586	0.0044843	0.0234742	0.271186	0.0321429	0.0152091	0.0701754	0.0298507	0.0869565	1.26333	1.06803	1.0667	1.03804	1.2455	1.03817	1.02478	1.02194	1.00551	1.01767	1.0831	1.01478	1.01895	1.01952	1.02316	1.13155
1.24529e-72	1.97516	0.561	0.237	4.19614e-68	cTEC	Pgm1	67.3771	1.50851	0.330406	0.216837	0.290051	0.183159	0.872768	0.820043	0.342834	0.116592	0.399061	0.440678	0.328571	0.121673	0.754386	0.343284	0.173913	1.59349	1.17539	1.14752	1.14188	1.16069	1.19548	1.22617	1.17344	1.07811	1.17865	1.14539	1.15713	1.10407	1.22264	1.14821	1.26831
2.0691e-72	1.63802	0.62	0.286	6.97204e-68	cTEC	Commd9	67.1566	1.45369	0.587267	0.25	0.580101	0.259277	0.898438	0.585501	0.230456	0.0358744	0.441315	0.745763	0.342857	0.106464	0.736842	0.343284	0.130435	1.51907	1.29079	1.16902	1.28056	1.20427	1.20087	1.16019	1.1179	1.01709	1.21884	1.24161	1.12131	1.07093	1.18961	1.1736	1.17413
2.25643e-72	1.06274	0.72	0.326	7.60325e-68	cTEC	Dpp6	67.119	5.20794	2.53458	0.283163	0.460371	3.19458	0.180804	0.412793	0.154723	0.121076	1.26291	2.40678	0.667857	0.0988593	0.166667	0.0298507	0	2.81603	2.06131	1.18178	1.2555	2.98424	1.06967	1.16081	1.12169	1.13061	1.63945	1.67407	1.24312	1.06782	1.05417	1.00859	1
4.32119e-72	1.21846	0.539	0.186	1.45607e-67	cTEC	Mgat3	66.8368	1.15312	1.03293	0.732143	0.301855	0.39058	0.0658482	0.0289979	0.128664	0.0852018	0.591549	0.610169	0.107143	0.0190114	0.0175439	0.0746269	0	1.48782	1.5027	1.44604	1.16796	1.38129	1.02283	1.01239	1.07843	1.063	1.24718	1.21349	1.06749	1.01116	1.00348	1.0342	1
5.06892e-72	1.0345	0.739	0.344	1.70802e-67	cTEC	Trim29	66.7675	2.57089	2.95829	0.625	1.11636	0.897241	0.579241	0.182942	0.544788	0.0224215	0.140845	0.423729	0.35	0.0722433	0.0789474	0.19403	0	1.83214	2.10158	1.45692	1.49105	1.68889	1.14212	1.0559	1.27428	1.01975	1.06939	1.13482	1.12555	1.05419	1.01345	1.0494	1
1.26885e-71	1.72607	0.533	0.18	4.27552e-67	cTEC	Ctf1	66.369	1.22495	0.948408	0.242347	0.539629	0.207422	0.316964	0.160768	0.0504886	0	0.169014	0.440678	0.225	0.0114068	0.894737	0.0298507	0	1.40588	1.43365	1.19201	1.2423	1.15623	1.0694	1.04736	1.02281	1	1.081	1.14286	1.08145	1.00549	1.23459	1.01054	1
1.61018e-71	1.56132	0.637	0.295	5.42565e-67	cTEC	Zmpste24	66.2655	1.60491	0.683864	0.255102	0.674536	0.221931	1.25893	0.7629	0.286645	0.116592	0.544601	0.983051	0.3	0.159696	0.72807	0.447761	0.304348	1.56152	1.33209	1.17313	1.30371	1.21261	1.27665	1.20458	1.12705	1.09466	1.25621	1.32077	1.12328	1.13286	1.19313	1.19457	1.43352
4.01092e-71	1.02474	0.877	0.611	1.35152e-66	cTEC	Ppp1r2	65.8692	5.66919	1.86279	0.923469	2.79933	0.708611	3.29353	5.58635	2.99674	0.829596	2.02817	3.18644	2.03929	0.844106	1.33333	3.37313	3.17391	2.38451	1.75592	1.52225	2.01	1.63089	1.67458	2.1604	2.07686	1.57664	1.76338	1.87584	1.80383	1.58902	1.37442	2.23011	3.22523
8.65673e-71	1.26892	0.601	0.229	2.91697e-66	cTEC	Ugdh	65.5351	1.69376	0.531284	0.265306	0.576728	0.337298	0.614955	0.678891	0.318404	0.251121	0.605634	0.491525	0.360714	0.129278	0.429825	1.02985	0	1.57219	1.26113	1.21214	1.27306	1.34707	1.17327	1.22023	1.17514	1.26184	1.32111	1.13698	1.26439	1.10853	1.11796	1.54298	1
1.01619e-70	1.23139	0.514	0.168	3.42414e-66	cTEC	Rapgef4	65.4654	1.09263	0.728869	0.0586735	0.718381	0.211465	0.200893	0.38806	0.0781759	0	2.00469	1.05085	0.0821429	0.0912548	0.429825	0.0746269	0.73913	1.39394	1.3485	1.05557	1.32831	1.21093	1.05779	1.12743	1.04731	1	1.75277	1.37029	1.02786	1.06171	1.12203	1.08737	1.816
1.59195e-70	1.06963	0.639	0.26	5.36422e-66	cTEC	Nrtn	65.2705	2.07183	4.29418	0.451531	0.482293	0.63844	0.773438	0.208102	0.0757329	0.0134529	0.183099	0.457627	0.15	0.0456274	0.315789	0.134328	0	1.73049	2.41877	1.3291	1.23602	1.48345	1.1811	1.06436	1.04712	1.01856	1.07752	1.14694	1.04514	1.02891	1.07101	1.03744	1
1.75473e-70	1.01757	0.892	0.579	5.91274e-66	cTEC	Sgpl1	65.2282	5.41399	0.700329	0.52551	0.548061	0.809943	4.81362	5.76247	4.43241	0.829596	5.32864	1.15254	1.45714	0.323194	0.666667	0.328358	0.0869565	2.47357	1.36354	1.35468	1.28457	1.753	1.89444	2.23605	2.48878	1.66382	2.54286	1.39377	1.76497	1.25983	1.16194	1.12449	1.09802
2.06988e-70	1.33006	0.66	0.282	6.97468e-66	cTEC	Hspb8	65.1565	2.14745	0.960483	0.903061	2.86678	0.3147	1.08036	0.599574	0.552932	0.0134529	0.248826	1.05085	0.45	0.0342205	0.122807	0.402985	0	1.70453	1.43934	1.49027	2.00157	1.31406	1.2518	1.1788	1.31263	1.01688	1.1148	1.31488	1.16051	1.02102	1.02642	1.22141	1
3.5962e-70	1.05369	0.924	0.715	1.21178e-65	cTEC	Mast4	64.9166	8.68431	5.07025	2.18622	3.39123	1.96337	2.77344	3.09424	2.6987	1.06278	3.50235	8.72881	4.33929	0.612167	1.64912	6.49254	1.13043	2.94351	2.6649	2.15885	2.19832	2.44731	1.62989	1.92429	2.17775	1.77121	2.17789	2.60958	2.79021	1.50109	1.43545	2.69106	2.22835
3.85004e-70	3.39122	0.251	0.034	1.29731e-65	cTEC	Pgam2	64.887	1.3327	0.259056	0.00255102	0.0522766	0.131304	0.0435268	0.0835821	0.029316	0	0	0.0169492	0.282143	0.114068	0.0438596	0.0447761	0	1.51869	1.12521	1.00181	1.0235	1.09275	1.01013	1.03635	1.03176	1	1	1.00638	1.06583	1.0391	1.00715	1.02216	1
4.63128e-70	1.13617	0.822	0.588	1.56056e-65	cTEC	Prdx5	64.8067	5.38374	2.64654	3.8648	2.81788	0.629638	3.19196	2.61109	3.34283	0.991031	3.69014	10.0508	1.62857	1.12548	6.38596	2.55224	0.304348	2.32105	2.01709	2.50725	2.03278	1.44608	1.62868	1.60739	2.14568	1.53078	2.15893	2.83364	1.60156	1.76498	2.1254	2.02796	1.34326
6.11414e-70	1.77039	0.276	0.041	2.06022e-65	cTEC	Penk	64.6861	0.608696	0.457739	0.0102041	0.0337268	0.0114177	0.0256696	0.591898	0.145765	0.107623	0.380282	0.135593	0	0	0.00877193	1.73134	0	1.2703	1.22911	1.01274	1.01852	1.0095	1.00585	1.20275	1.08087	1.06845	1.21007	1.04207	1	1	1.00146	1.75571	1
1.00063e-69	1.31279	0.718	0.358	3.37173e-65	cTEC	Rab15	64.4721	2.14367	1.03513	0.596939	1.27487	0.441246	0.825893	0.860128	0.435668	0.107623	0.206573	1.30508	0.282143	0.0380228	0.114035	0.0298507	0	1.71771	1.49301	1.38143	1.51795	1.41977	1.20112	1.25091	1.26014	1.08038	1.10842	1.37764	1.12973	1.02592	1.02437	1.01365	1
1.11772e-69	1.7288	0.282	0.046	3.76626e-65	cTEC	Grap2	64.4241	0.618147	0.144896	0.0102041	0.0252951	0.0511418	0.0491071	0.0558635	0.0301303	0.0044843	0.00469484	0	0.0107143	1.47148	0.0263158	0	0	1.2437	1.07646	1.00812	1.0128	1.06116	1.01831	1.02296	1.0175	1.00273	1.0008	1	1.0133	2.22544	1.00429	1	1
2.30163e-69	1.82376	0.446	0.124	7.75558e-65	cTEC	Gch1	64.1104	1.0775	0.0450055	0.125	0.0708263	0.0499524	0.321429	0.412367	0.390879	0.161435	1.6338	0.59322	0.203571	1.05323	0.157895	0.0298507	0.0869565	1.41175	1.02484	1.0845	1.03676	1.05765	1.08333	1.1412	1.21701	1.12858	1.69711	1.19122	1.15046	1.77225	1.03961	1.01934	1.13341
3.25101e-69	1.38311	0.72	0.372	1.09546e-64	cTEC	Abhd6	63.9604	2.3138	0.4764	0.443878	0.583474	0.459562	1.53013	1.07761	0.830619	0.192825	0.643192	1.15254	0.317857	0.114068	0.254386	0.0149254	0.0869565	1.80669	1.26248	1.2906	1.27481	1.45606	1.35915	1.33217	1.42299	1.12585	1.33184	1.40635	1.18511	1.10686	1.06281	1.00407	1.14481
3.39581e-69	1.03981	0.815	0.558	1.14425e-64	cTEC	Psmc2	63.9415	3.38563	1.34577	1.04847	1.61551	0.678164	3.58147	2.59915	1.35749	0.511211	1.02817	2.77966	1.04643	0.604563	1.42982	1.1194	0.478261	1.97264	1.61428	1.59683	1.6902	1.4987	1.67244	1.61246	1.54938	1.32906	1.41362	1.75232	1.39604	1.37661	1.33439	1.56657	1.5724
5.5799e-69	2.27327	0.31	0.055	1.8802e-64	cTEC	Olfml1	63.7258	0.595463	0.39517	0	0.220911	0.0803996	0.0145089	0.0371002	0.0309446	0	0	0	0.0178571	0	0.00877193	0.567164	0	1.25408	1.20282	1	1.1412	1.06968	1.00275	1.02019	1.01766	1	1	1	1.00478	1	1.00876	1.27924	1
1.01849e-68	1.08964	0.832	0.526	3.43191e-64	cTEC	Fkbp4	63.4645	4.11531	2.0966	1.1148	2.98482	0.909848	6.33705	0.994456	0.650651	0.493274	3	4.11864	1.675	1.46008	2.15789	0.955224	0.608696	2.11776	1.8578	1.629	1.9955	1.65266	2.03359	1.27303	1.35185	1.27034	2.06385	1.93815	1.58494	1.87685	1.48426	1.53852	1.76404
5.06633e-68	1.71539	0.609	0.253	1.70715e-63	cTEC	Dhx29	62.7677	1.60491	0.645445	0.237245	0.337268	0.331113	0.852679	0.498507	0.369707	0.103139	0.239437	0.355932	0.267857	0.205323	0.684211	0.268657	0	1.68159	1.31897	1.17579	1.17742	1.32601	1.22338	1.15292	1.23593	1.08806	1.12999	1.13765	1.13321	1.17297	1.19843	1.15147	1
3.361e-67	1.32846	0.713	0.385	1.13252e-62	cTEC	Mtln	61.946	2.16635	1.41822	0.780612	1.14334	0.401998	1.42634	0.843497	0.399837	0.165919	0.507042	1.10169	0.4	0.307985	1.72807	0.522388	0.0869565	1.7018	1.64097	1.45621	1.54176	1.31334	1.31541	1.22388	1.20321	1.11725	1.22087	1.34059	1.1783	1.2222	1.41144	1.31288	1.14463
4.48648e-67	1.24656	0.737	0.384	1.51176e-62	cTEC	2610016A17Rik	61.8205	2.6276	0.425906	0.663265	0.962901	0.403663	1.81027	2.72921	0.732899	0.0852018	1.93897	7.27119	0.935714	0.0418251	0.859649	0.0149254	0	1.82634	1.21045	1.40687	1.42327	1.34799	1.38954	1.63692	1.34696	1.05389	1.66619	2.45064	1.2911	1.02601	1.19544	1.00742	1
6.44108e-67	1.04706	0.817	0.571	2.17039e-62	cTEC	Arl6ip5	61.6635	4.81285	2.83974	1.18622	5.05059	1.04234	2.47768	1.57996	0.927524	0.932735	1.14085	4.22034	2.63571	1.09125	10.7105	1.98507	1.95652	2.20983	2.06739	1.62128	2.47548	1.72117	1.50757	1.40749	1.41702	1.62605	1.46349	2.02926	1.69493	1.79809	2.61884	1.82758	2.57336
1.4956e-66	1.93412	0.518	0.193	5.03958e-62	cTEC	Ufsp1	61.2976	1.01512	0.102086	0.0382653	0.129848	0.0566127	0.378348	0.924947	0.619707	0.0807175	0.267606	0.169492	0.0964286	0.0190114	0.254386	0.0447761	0	1.505	1.05787	1.02421	1.06725	1.06044	1.09589	1.32478	1.34568	1.10508	1.12801	1.06751	1.04986	1.01903	1.07457	1.017	1
6.63255e-66	1.28906	0.369	0.098	2.2349e-61	cTEC	Samd5	60.6507	0.79206	1.12953	0.102041	0.419899	0.12607	0.0491071	0.0933902	0.0985342	0.0179372	0.0657277	0	0.0928571	0.0114068	0	0.0895522	0	1.29936	1.53522	1.08362	1.22168	1.1498	1.01829	1.03272	1.04795	1.02674	1.02758	1	1.04003	1.00581	1	1.07626	1
3.3352e-65	1.52628	0.507	0.17	1.12383e-60	cTEC	Hdac11	59.9493	0.863894	0.422613	0.221939	0.48398	0.176736	0.321429	0.191471	0.178339	0.00896861	0.394366	0.559322	0.217857	0.0342205	0.22807	0.0746269	0	1.3489	1.2174	1.14955	1.23061	1.16563	1.08052	1.06218	1.10563	1.00794	1.19051	1.17255	1.10609	1.01918	1.05972	1.07367	1
3.42678e-65	1.04696	0.673	0.3	1.15469e-60	cTEC	Dsc3	59.9375	1.99622	2.44237	0.362245	0.676223	0.68078	0.658482	0.27548	0.287459	0.0044843	0.0422535	1.67797	0.0821429	0.0228137	0.00877193	0.0149254	0	1.69338	1.97543	1.28123	1.31415	1.5578	1.17322	1.08295	1.16698	1.0045	1.01775	1.45261	1.03395	1.01656	1.00143	1.00742	1
8.47202e-65	2.31998	0.302	0.055	2.85473e-60	cTEC	Frem2	59.5444	0.519849	0.328211	0.0204082	0.143339	0.0406755	0.0892857	0.132623	0.0447883	0	0.0140845	0	0.0928571	0.0190114	0.0263158	0	0	1.23622	1.18335	1.01691	1.06923	1.04554	1.0243	1.04637	1.0352	1	1.00662	1	1.0249	1.01073	1.0066	1	1
1.00237e-64	1.25037	0.531	0.189	3.37759e-60	cTEC	Dennd5b	59.4714	1.21361	0.916575	0.204082	0.450253	0.227402	0.543527	0.420043	0.52443	0.215247	0.835681	0.372881	0.578571	0.190114	0.561404	0.402985	0.608696	1.52597	1.46147	1.14561	1.23908	1.25624	1.17877	1.15229	1.27134	1.21401	1.38401	1.10168	1.34117	1.11139	1.23112	1.18861	1.75662
1.00884e-64	1.38009	0.66	0.308	3.39937e-60	cTEC	Stx11	59.4686	1.75992	0.307355	0.331633	0.244519	0.224786	0.970982	1.48443	0.69544	0.699552	0.225352	0.20339	0.146429	0.121673	0.0614035	0.41791	0.0869565	1.61989	1.15841	1.20375	1.13507	1.23402	1.21686	1.43139	1.36704	1.46078	1.11715	1.06866	1.10911	1.10252	1.01163	1.17256	1.10412
1.64303e-64	1.66362	0.541	0.219	5.53634e-60	cTEC	Ppcs	59.2568	1.19093	0.355653	0.165816	0.650927	0.139153	0.814732	0.470362	0.233713	0.0493274	0.211268	0.644068	0.15	0.0836502	0.508772	0.134328	0.0434783	1.39507	1.17964	1.10211	1.29109	1.12227	1.18171	1.12874	1.11555	1.05067	1.12482	1.26255	1.07204	1.06515	1.1395	1.07324	1.08258
1.89548e-64	3.2555	0.251	0.036	6.38702e-60	cTEC	Cox8b	59.1947	1.48015	0.0428101	0	0.917369	0.099667	0.0267857	0.0904051	0.105049	0.0044843	0.00938967	0.932203	0.307143	0.0190114	0.105263	0.0447761	0.0434783	1.54066	1.01962	1	1.38926	1.08046	1.01274	1.0303	1.03113	1.01177	1.00395	1.32165	1.09058	1.00879	1.01741	1.02143	1.11371
5.14673e-64	1.43501	0.677	0.33	1.73424e-59	cTEC	Foxn1	58.7609	2.05482	0.346872	0.168367	0.229342	0.283302	2.24888	2.06994	0.935668	0.139013	0.0798122	0.0169492	0.125	0.0190114	0.0614035	0	0	1.78897	1.19534	1.13804	1.11818	1.30069	1.48016	1.57146	1.44859	1.13362	1.04363	1.01214	1.05874	1.01995	1.01658	1	1
9.43467e-64	1.0656	0.856	0.62	3.17911e-59	cTEC	S100a1	58.4977	8.38374	3.91767	2.39031	9.34907	0.918649	2.18192	5.20938	4.72476	2.32735	4.98592	36.0169	4.08214	0.209125	34.6667	1.25373	1.21739	2.75855	2.32235	2.01846	3.0651	1.60888	1.47319	2.12254	2.39824	2.08645	2.44138	4.32856	2.46366	1.12708	3.90924	1.53772	2.30872
1.47354e-63	1.24178	0.718	0.445	4.96523e-59	cTEC	Hadhb	58.3041	2.64461	1.80022	0.571429	1.3457	0.339676	1.44978	1.36546	0.758143	0.26009	1.20657	2.98305	0.878571	0.463878	1.86842	1.02985	0.565217	1.79084	1.78109	1.34176	1.5541	1.29504	1.30723	1.358	1.37523	1.25107	1.49753	1.76887	1.36822	1.3884	1.45737	1.56497	1.63502
4.00766e-63	1.4104	0.643	0.294	1.35042e-58	cTEC	Siva1	57.8695	1.98677	1.53677	0.436224	0.802698	0.456946	1.89955	0.283156	0.179153	0.0313901	0.314554	2.15254	0.382143	0.730038	0.517544	0.731343	0.217391	1.65967	1.68655	1.28074	1.39304	1.32566	1.36929	1.08132	1.09936	1.03659	1.15739	1.57557	1.13913	1.37324	1.12885	1.43059	1.3266
1.41107e-62	2.72331	0.293	0.084	4.75473e-58	cTEC	Gm13205	57.3229	0.744802	0.108672	0.0433673	0.0455312	0.0206946	0.359375	0.29339	0.0960912	0	0.0516432	0.0508475	0.00357143	0.0304183	0.0526316	0.0149254	0	1.25111	1.05495	1.03068	1.02099	1.01935	1.08324	1.07844	1.04498	1	1.02203	1.01021	1.00143	1.02132	1.00977	1.00356	1
1.8026e-62	1.04828	0.813	0.498	6.07405e-58	cTEC	Ptov1	57.2165	3.08885	1.98024	0.989796	1.95447	0.912226	2.74554	0.823881	0.261401	0.125561	1.71362	2.05085	1.73214	0.460076	1.73684	1.58209	0.521739	1.96706	1.82947	1.57653	1.83739	1.69841	1.55566	1.22223	1.14395	1.0936	1.72871	1.54626	1.64626	1.42006	1.4293	1.8089	1.68018
2.36859e-62	1.40813	0.807	0.541	7.98121e-58	cTEC	Tnc	57.0979	8.80529	2.76729	0.956633	0.875211	1.95076	5.43527	4.37697	3.90391	0.242152	0.300469	0.118644	10.0107	0.0836502	0.289474	1.34328	0.0869565	3.11764	2.08032	1.63872	1.41531	2.33454	2.02819	2.03732	2.43893	1.24511	1.13667	1.04758	3.60315	1.08521	1.06653	1.50416	1.11026
3.51406e-62	1.17873	0.677	0.314	1.1841e-57	cTEC	Prxl2c	56.9266	1.67297	1.40285	0.795918	0.848229	0.441246	0.63058	0.319829	0.209283	0.139013	0.507042	1.79661	0.489286	0.163498	0.578947	0.850746	0.217391	1.59779	1.63852	1.47079	1.38809	1.37602	1.16132	1.09962	1.12148	1.12551	1.26522	1.50022	1.23117	1.16072	1.15536	1.42826	1.27286
3.56165e-62	1.75174	0.429	0.126	1.20013e-57	cTEC	Dnah9	56.9208	1.10775	0.0724479	0.0765306	0.0944351	0.154139	0.185268	0.548827	0.57329	0.0358744	0.924883	0.0508475	0.0714286	0.0152091	0.701754	0.0149254	0	1.53267	1.03903	1.02969	1.04642	1.19878	1.07691	1.21751	1.36902	1.04194	1.38335	1.01453	1.05415	1.01076	1.25356	1.00837	1
4.06425e-61	1.85844	0.622	0.355	1.36949e-56	cTEC	Pds5b	55.8634	4.1758	0.872667	0.47449	0.374368	0.424358	1.36272	1.97186	0.877036	0.130045	1.2723	0.508475	0.407143	0.775665	1.65789	1.04478	0.391304	2.23598	1.44667	1.34014	1.20366	1.47085	1.35321	1.59076	1.43613	1.11539	1.51904	1.15757	1.25126	1.64244	1.40318	1.58288	1.64956
4.35023e-61	1.3923	0.599	0.25	1.46585e-56	cTEC	Dhrs3	55.8339	1.53875	1.63337	0.65051	0.347386	0.293054	0.522321	0.342431	0.561075	0.125561	0.431925	0.661017	0.296429	0.315589	0.131579	0.402985	1.13043	1.60096	1.69388	1.39453	1.14725	1.26613	1.12567	1.10063	1.29474	1.09837	1.18289	1.24407	1.14131	1.30288	1.03197	1.3043	2.31465
4.46018e-61	1.762	0.319	0.07	1.5029e-56	cTEC	Sfxn5	55.8231	0.563327	0.294182	0.0867347	0.219224	0.0737393	0.0636161	0.10533	0.0618893	0.00896861	0.107981	0.118644	0.0892857	0.026616	0.0526316	0.0447761	0.130435	1.23586	1.17074	1.07535	1.10137	1.09463	1.02397	1.04178	1.04885	1.00984	1.06463	1.04533	1.0444	1.01201	1.02976	1.03516	1.19456
4.8825e-61	1.71511	0.684	0.334	1.64521e-56	cTEC	Frmd6	55.7838	4.32703	2.18441	0.556122	0.817875	1.01094	0.360491	0.152239	0.197883	0.0358744	0.150235	0.474576	0.175	0.501901	0.263158	1.97015	0	2.329	1.94326	1.4158	1.44495	1.91644	1.12603	1.064	1.14538	1.03127	1.08088	1.14977	1.11119	1.46433	1.07137	1.88058	1
5.97247e-61	1.00674	0.845	0.543	2.01248e-56	cTEC	Lasp1	55.6963	3.15501	1.00439	1	0.959528	0.996908	1.89174	1.23113	1.38681	1.10314	2.1831	2.37288	0.85	0.326996	0.368421	1.19403	0.652174	2.01646	1.48985	1.60399	1.4558	1.77187	1.41373	1.37556	1.65907	1.69216	1.83426	1.65039	1.4296	1.24559	1.11297	1.57562	1.88629
6.50271e-61	1.61653	0.395	0.11	2.19115e-56	cTEC	Dennd2c	55.6593	0.733459	0.441273	0.260204	0.198988	0.125119	0.0647321	0.146269	0.220684	0.0044843	0.126761	0.118644	0.107143	0.0380228	0.0526316	0.0149254	0.0869565	1.33389	1.22851	1.17787	1.10441	1.14423	1.02686	1.06138	1.17466	1.00096	1.07073	1.03828	1.05859	1.03546	1.01649	1.01514	1.14628
1.00115e-60	1.08764	0.82	0.537	3.37348e-56	cTEC	Arhgdib	55.4719	6.32136	4.49177	1.15816	1.54637	1.28663	9.39621	5.29211	0.790717	0.35426	0.103286	0.237288	0.325	4.20913	0.535088	0.925373	0.0434783	2.47725	2.43376	1.67773	1.65618	1.75911	2.33604	1.99609	1.35663	1.34959	1.06645	1.08011	1.09762	2.8901	1.09323	1.45609	1.08049
1.48422e-60	1.0348	0.802	0.479	5.00124e-56	cTEC	Crip2	55.3009	5.2741	2.36663	2.55612	4.83811	1.65128	4.16406	0.859701	0.802932	0.107623	0.460094	4.67797	2.47857	0.0988593	0.342105	5.50746	4.34783	2.2996	1.96317	2.09187	2.54156	1.96213	1.77031	1.23366	1.38423	1.12304	1.19373	2.08328	1.65536	1.04291	1.09436	2.85399	3.58605
2.19682e-60	1.94505	0.338	0.077	7.40241e-56	cTEC	B3galt5	55.1306	0.601134	0.0208562	0.00510204	0.145025	0.019981	0.176339	0.196588	0.423453	0.00896861	0.455399	0	0.335714	0.0152091	0.0175439	0	0	1.24215	1.01021	1.0108	1.05818	1.01806	1.04376	1.07162	1.25994	1.01045	1.1995	1	1.24036	1.01302	1.0059	1	1
2.86974e-60	1.49105	0.815	0.548	9.66987e-56	cTEC	Krt5	55.0146	33.9754	7.48957	7.93622	20.3221	9.85466	11.6217	0.501919	4.64495	0.112108	0.169014	0.508475	0.282143	0.528517	0.5	1.52239	0.173913	4.38172	2.98448	3.51314	4.05026	3.85074	2.66467	1.17484	2.48153	1.11318	1.11399	1.25573	1.17486	1.2579	1.08593	1.39694	1.31171
3.19503e-60	1.73937	0.512	0.214	1.0766e-55	cTEC	Gcsh	54.9679	1.19093	0.659715	0.165816	0.462057	0.119648	1.07812	0.417058	0.149023	0.0538117	0.201878	0.271186	0.192857	0.197719	1.08772	0.58209	0.173913	1.39198	1.31656	1.09676	1.21155	1.08319	1.23325	1.11417	1.06294	1.04089	1.09686	1.10085	1.07497	1.13184	1.26126	1.30085	1.25329
3.36996e-60	1.00829	0.798	0.57	1.13554e-55	cTEC	Rrp1	54.9448	3.30813	1.68167	0.913265	1.86678	0.650809	3.41518	2.13518	0.957655	0.502242	1.60563	2.45763	1.55714	1.39163	1.77193	0.80597	0.521739	1.97084	1.72829	1.54616	1.75595	1.51193	1.66007	1.52784	1.44754	1.36618	1.65994	1.67472	1.6315	1.86103	1.40194	1.42619	1.5322
6.11177e-60	1.24139	0.698	0.412	2.05942e-55	cTEC	Pitpnb	54.6863	2.06805	1.05488	0.415816	0.733558	0.364177	1.72768	1.00768	0.466612	0.295964	0.723005	1.47458	0.617857	0.539924	1.14912	0.641791	0.478261	1.6903	1.48449	1.29235	1.33463	1.34086	1.36417	1.28507	1.25392	1.25924	1.3434	1.43354	1.29555	1.44227	1.2762	1.41833	1.54131
7.92114e-60	1.78521	0.461	0.156	2.66911e-55	cTEC	Nlrp4e	54.5736	0.795841	0.159166	0.165816	0.23946	0.07255	0.458705	0.44307	0.197883	0.0941704	0.314554	0.101695	0.332143	0.0228137	0.0526316	0	0	1.30101	1.08141	1.11002	1.11725	1.06836	1.11185	1.13069	1.10359	1.06208	1.13347	1.0464	1.18458	1.01272	1.00922	1	1
1.56641e-59	1.7203	0.705	0.416	5.27817e-55	cTEC	Hes6	54.2775	5.90737	0.638858	0.334184	0.473862	1.63915	11.3638	2.44307	0.352606	0.103139	1.29577	1.32203	5.13214	0.422053	1.09649	0.38806	0.0869565	2.64714	1.28947	1.21222	1.23652	1.94074	2.51478	1.54455	1.18419	1.09752	1.54513	1.42015	1.98259	1.30445	1.26606	1.18584	1.11835
3.8685e-59	1.27989	0.735	0.4	1.30353e-54	cTEC	Clip4	53.8849	2.6862	0.742042	0.880102	0.281619	0.569458	2.84152	2.73603	0.447883	0.0179372	0.215962	0.542373	0.1	0.0304183	0.421053	0.134328	0	1.97684	1.39157	1.5811	1.16737	1.53741	1.61981	1.70799	1.24976	1.03352	1.146	1.14908	1.06134	1.0358	1.11843	1.05956	1
5.56266e-59	1.22798	0.359	0.092	1.87439e-54	cTEC	Npl	53.7271	0.920605	0.421515	0.00765306	0.10118	0.0623216	0.16183	1.12751	0.564332	0.0269058	0.0234742	0.0169492	0.0214286	0.00760456	1.11404	0.0298507	0	1.32255	1.20826	1.01971	1.04573	1.05637	1.03918	1.357	1.23441	1.01724	1.02653	1.00294	1.00553	1.00998	1.2748	1.01719	1
6.36904e-59	1.82082	0.478	0.179	2.14611e-54	cTEC	Rassf2	53.6683	1.13043	0.418222	0.0102041	0.123103	0.0285442	0.485491	0.576972	0.637622	1.11211	0.0657277	0.101695	0.0678571	0.13308	0.166667	0.447761	0.0434783	1.44571	1.22686	1.00904	1.06256	1.02657	1.12839	1.19621	1.3301	1.76319	1.02918	1.03496	1.05335	1.11888	1.04417	1.22171	1.06095
8.17587e-59	1.30778	0.527	0.198	2.75494e-54	cTEC	Rcan1	53.5599	1.3913	0.272228	0.270408	0.438449	0.351332	0.393973	0.315139	0.278502	0.058296	0.225352	0.525424	0.178571	0.0722433	1.85965	0.373134	0.0869565	1.49013	1.1432	1.19915	1.2173	1.35437	1.10379	1.10763	1.17112	1.05476	1.11377	1.16575	1.07036	1.03762	1.4439	1.26215	1.14466
1.22951e-58	2.4761	0.259	0.043	4.14294e-54	cTEC	Parvb	53.3827	0.410208	0.158068	0	0.0893761	0.0135585	0.138393	0.127932	0.012215	0	0.0187793	0.118644	0.110714	0.0304183	0.00877193	0.0447761	0.391304	1.16148	1.0823	1	1.03382	1.01644	1.04436	1.04514	1.00542	1	1.01589	1.02082	1.06196	1.02875	1.00143	1.01916	1.4414
1.2796e-58	1.03794	0.788	0.516	4.31175e-54	cTEC	Pam16	53.3653	3.14934	1.53019	0.660714	1.86847	0.443625	4.52121	3.15864	1.24756	0.502242	1.76526	2.72881	1.45714	0.825095	1.87719	0.597015	0.434783	1.93371	1.66345	1.40141	1.74204	1.314	1.79255	1.69779	1.52754	1.28243	1.69497	1.73166	1.48147	1.48886	1.42728	1.3491	1.58014
1.627e-58	1.49751	0.595	0.261	5.48233e-54	cTEC	Snx30	53.261	1.37996	0.347969	0.191327	0.145025	0.302569	1.61272	0.694243	0.224756	0.152466	1.13146	1.79661	0.578571	0.277567	0.403509	0.19403	0.0434783	1.63341	1.19528	1.1721	1.08298	1.32152	1.35564	1.22416	1.13566	1.16377	1.52141	1.54901	1.32407	1.23826	1.09924	1.08417	1.02566
1.82987e-58	2.99442	0.263	0.052	6.16594e-54	cTEC	Stc2	53.21	0.533081	0.0230516	0.0229592	0.00674536	0.0154615	0.214286	0.317697	0.0472313	0	0.0140845	0	0.110714	0.00380228	0.0614035	0.0597015	0	1.26471	1.01227	1.01435	1.0032	1.01549	1.05613	1.10274	1.02304	1	1.00893	1	1.04015	1.00379	1.01479	1.03188	1
2.15066e-58	2.22353	0.427	0.172	7.24686e-54	cTEC	Fn1	53.1399	2.75425	0.369923	0.346939	0.116358	0.333492	0.366071	1.26823	0.921824	0.282511	0.056338	0.254237	0.0214286	0.0190114	0.157895	5.97015	0.0869565	2.12409	1.21261	1.23286	1.05933	1.35165	1.09382	1.42142	1.50933	1.11662	1.02692	1.09808	1.01997	1.01348	1.03396	2.8347	1.17046
4.81141e-58	1.05489	0.815	0.555	1.62125e-53	cTEC	Perp	52.7901	7.8242	5.98793	2.24745	6.76728	2.12583	3.03125	1.17484	3.34853	0.55157	0.460094	6.25424	0.896429	0.121673	0.798246	0.313433	0	2.61585	2.71905	2.11663	2.76663	2.13156	1.62027	1.30279	2.11902	1.34316	1.21141	2.32925	1.34568	1.07793	1.20134	1.16162	1
5.71245e-58	1.49935	0.595	0.293	1.92487e-53	cTEC	Dctn1	52.7156	1.96408	1.3787	0.306122	0.386172	0.357992	0.56808	0.355224	0.327362	0.201794	0.483568	1.28814	0.4	0.178707	0.508772	0.462687	0.217391	1.62758	1.59201	1.21132	1.19072	1.31365	1.14054	1.11811	1.19431	1.14949	1.2536	1.34698	1.21232	1.14874	1.13899	1.20864	1.35426
6.90048e-58	1.22457	0.679	0.34	2.32519e-53	cTEC	Pls1	52.6335	2.41021	0.74753	0.584184	2.77403	0.336822	0.745536	0.858849	0.903909	2.13004	0.99061	0.898305	0.753571	0.0722433	1.12281	0.0149254	0	1.81722	1.36031	1.3889	2.01266	1.36089	1.18174	1.26773	1.50495	2.37546	1.48189	1.34528	1.34618	1.03393	1.29797	1.00356	1
7.21299e-58	1.01049	0.626	0.279	2.43049e-53	cTEC	Efs	52.6143	1.31758	0.716795	0.237245	0.816189	0.432683	0.987723	0.176546	0.210912	0.0403587	0.305164	1.05085	0.432143	0.0304183	0.105263	0.343284	0	1.4929	1.35072	1.18224	1.37587	1.41981	1.24618	1.05991	1.13241	1.04973	1.14055	1.30002	1.21414	1.03658	1.03394	1.22258	1
7.77661e-58	1.01828	0.711	0.358	2.62041e-53	cTEC	Tfdp2	52.5816	2.15123	2.10538	0.609694	0.650927	0.670076	1.07254	0.446055	0.273616	0.0807175	0.502347	0.864407	0.535714	0.634981	0.964912	0.253731	0.130435	1.77204	1.90835	1.40333	1.32394	1.6097	1.2592	1.15598	1.15966	1.05805	1.21764	1.26611	1.2502	1.50755	1.30798	1.13083	1.28285
1.00897e-57	1.02607	0.828	0.568	3.39982e-53	cTEC	Plaat3	52.4685	4.20983	2.03293	1.09439	2.00169	0.779971	2.89286	2.59019	2.7215	0.587444	0.906103	3.35593	3.71071	0.326996	1.76316	1.01493	0.608696	2.14396	1.85763	1.62019	1.82666	1.56826	1.58616	1.63026	1.9764	1.29322	1.38424	1.89625	2.21696	1.23512	1.42071	1.46129	1.69144
1.60558e-57	1.58653	0.529	0.21	5.41018e-53	cTEC	Srebf1	52.2668	1.18336	0.560922	0.443878	0.46543	0.175785	0.334821	0.279744	0.241042	0.143498	0.253521	0.372881	0.182143	0.102662	0.245614	0.537313	0.0434783	1.4543	1.29559	1.31827	1.2334	1.19635	1.08369	1.09027	1.14657	1.11284	1.13492	1.12337	1.10993	1.07703	1.06788	1.27779	1.06095
1.80421e-57	1.40769	0.59	0.264	6.07946e-53	cTEC	Gcat	52.2161	1.41588	0.263447	0.0637755	0.204047	0.088725	2.0904	1.88358	0.668567	0.192825	0.244131	0.186441	0.189286	0.0342205	0.403509	0.0895522	0.0869565	1.5233	1.13829	1.05392	1.10723	1.08472	1.42701	1.45984	1.29531	1.13135	1.12719	1.08401	1.07123	1.02134	1.09909	1.03862	1.19187
7.40583e-57	1.85796	0.474	0.196	2.49547e-52	cTEC	Mfsd10	51.6028	1.24764	0.46652	0.234694	0.421585	0.131066	0.926339	0.294243	0.0855049	0.0493274	0.122066	0.169492	0.142857	0.171103	0.508772	0.716418	0.26087	1.3962	1.24989	1.15861	1.2109	1.1111	1.20486	1.08029	1.03787	1.03799	1.05896	1.04421	1.05624	1.0919	1.12471	1.38926	1.27775
1.01356e-56	1.36666	0.599	0.274	3.41529e-52	cTEC	Dynlt1f	51.4666	1.4707	0.768386	0.413265	0.910624	0.200761	1.74888	0.414072	0.214169	0.0538117	1.44131	1.69492	0.828571	0.376426	0.929825	0.402985	0	1.46862	1.36527	1.23542	1.37518	1.15443	1.3602	1.10814	1.09954	1.03529	1.55465	1.4593	1.25557	1.2274	1.21899	1.17904	1
1.01364e-56	1.01493	0.788	0.537	3.41555e-52	cTEC	Timm8b	51.4665	3.10586	1.71021	1.15561	2.21754	0.62274	3.6596	2.25885	1.06922	0.55157	1.38967	4.47458	1.45357	0.528517	1.71053	0.701493	0.26087	1.93163	1.71964	1.62923	1.86115	1.44131	1.67491	1.538	1.4741	1.33768	1.53831	2.02676	1.4559	1.31618	1.39699	1.32676	1.36159
1.24981e-56	1.01816	0.775	0.435	4.21136e-52	cTEC	Abtb3	51.3756	3.38563	2.40724	0.821429	0.602024	0.834443	1.49665	1.39019	1.53094	1.16592	3.01878	0.59322	1.65714	0.330798	0.701754	0.164179	0.0434783	2.16823	1.99629	1.56498	1.27851	1.81357	1.38434	1.50819	1.78531	1.9059	2.01888	1.20497	1.75549	1.37223	1.25594	1.11676	1.08811
2.50811e-56	1.24663	0.556	0.225	8.45133e-52	cTEC	Six2	51.0731	1.08318	0.657519	0.181122	0.644182	0.273787	0.852679	0.34371	0.0895765	0.0044843	0.197183	0.305085	0.257143	0.026616	0.0789474	0.0895522	0	1.38828	1.31982	1.11179	1.29718	1.24013	1.19427	1.09786	1.05191	1.00555	1.08594	1.0959	1.12099	1.01551	1.01538	1.03114	1
2.90949e-56	1.24404	0.605	0.267	9.80381e-52	cTEC	Isoc1	51.0086	1.65595	1.85181	0.484694	1.09949	0.322312	1.05134	0.16162	0.131922	0.107623	0.403756	1.37288	0.464286	0.323194	0.903509	0.462687	0.217391	1.53866	1.78777	1.33278	1.47664	1.24668	1.23084	1.04669	1.05815	1.09119	1.19401	1.36318	1.25511	1.24965	1.21667	1.19446	1.25575
2.91211e-56	1.27412	0.611	0.274	9.81264e-52	cTEC	Adprs	51.0082	1.138	0.709111	0.372449	0.424958	0.264986	0.791295	0.337313	0.302117	0.0807175	0.253521	0.610169	0.228571	0.174905	0.587719	0.343284	0.130435	1.4612	1.34822	1.28102	1.21096	1.26124	1.18026	1.10754	1.17663	1.07467	1.13517	1.21665	1.12434	1.16056	1.14483	1.16133	1.21269
6.41512e-56	1.45132	0.422	0.133	2.16164e-51	cTEC	Cbr3	50.6652	0.706994	0.39517	0.635204	0.315346	0.135585	0.1875	0.0993603	0.150651	0.0134529	0.0985915	0.644068	0.782143	0.0456274	0.95614	0.58209	0	1.27548	1.21032	1.34532	1.16812	1.10241	1.04127	1.03368	1.0793	1.01736	1.04542	1.24557	1.31255	1.01796	1.26177	1.30576	1
1.48697e-55	1.16836	0.586	0.251	5.01049e-51	cTEC	Lonrf1	50.3001	1.45369	0.496158	0.219388	0.629005	0.354186	0.363839	0.462687	0.444625	0.183857	0.319249	0.355932	0.210714	0.0760456	0.54386	0.0597015	0	1.54476	1.26079	1.17202	1.31069	1.39602	1.10493	1.15292	1.27825	1.19179	1.16741	1.09604	1.16318	1.05662	1.1769	1.06014	1
7.92611e-55	1.3943	0.601	0.284	2.67078e-50	cTEC	1300002E11Rik	49.5734	1.32136	0.502744	0.295918	0.529511	0.236917	0.691964	0.614925	0.427524	0.125561	0.915493	0.711864	0.332143	0.30038	0.622807	0.268657	0.0434783	1.49375	1.2575	1.21314	1.2755	1.208	1.16715	1.17334	1.21653	1.0837	1.40694	1.26208	1.12642	1.32845	1.16807	1.17473	1.11371
1.19339e-54	1.07575	0.762	0.451	4.02124e-50	cTEC	Lgals9	49.3956	3.67108	1.87157	0.956633	0.816189	1.36489	1.01674	0.831983	0.583062	0.484305	1.23944	1.61017	1.40357	1.19011	0.508772	1.13433	0.695652	2.10404	1.81987	1.55791	1.41703	1.94001	1.24433	1.23949	1.33334	1.33567	1.51272	1.48636	1.63666	1.8403	1.14106	1.55692	1.77344
1.74708e-54	2.42043	0.327	0.092	5.88697e-50	cTEC	Trpm2	49.2301	0.620038	0.01427	0.00765306	0.00674536	0.0708849	0.222098	0.405544	0.0252443	0.0044843	0.699531	0	0.00714286	0.0152091	0.0438596	0	0	1.35066	1.0085	1.0065	1.00364	1.0821	1.05499	1.13668	1.01581	1.00597	1.38367	1	1.01534	1.0152	1.01079	1	1
1.8309e-54	1.04387	0.696	0.354	6.1694e-50	cTEC	Cuedc1	49.2098	1.60681	0.97146	0.640306	0.681282	0.541627	0.595982	0.440512	0.30456	0.0896861	0.812207	2.0678	0.453571	0.0646388	0.763158	0.791045	0.478261	1.69186	1.4905	1.47577	1.36011	1.58026	1.15763	1.14034	1.20553	1.09797	1.38203	1.62317	1.28762	1.0522	1.18654	1.34271	1.52604
5.67891e-54	1.08008	0.752	0.442	1.91356e-49	cTEC	Cxxc5	48.7182	2.40832	0.529089	0.688776	0.63575	0.575404	2.11719	1.54797	0.993485	0.242152	1.16432	1.54237	0.728571	0.334601	0.754386	0.656716	0	1.80784	1.27862	1.43562	1.29943	1.51941	1.45595	1.41814	1.47439	1.1953	1.46512	1.46157	1.31129	1.34874	1.1924	1.31596	1
3.59883e-53	1.07877	0.733	0.444	1.21266e-48	cTEC	Rexo2	47.9163	2.74858	1.37431	0.757653	2.17201	0.660561	2.77902	0.992751	0.530945	0.358744	0.469484	1.59322	0.714286	1.13688	2.26316	1.97015	0.826087	1.80542	1.60791	1.48291	1.82429	1.46876	1.54418	1.26396	1.24735	1.18208	1.22647	1.50404	1.26901	1.45164	1.51071	1.90104	1.85979
1.28734e-52	1.32844	0.618	0.296	4.33782e-48	cTEC	Gm12216	47.3627	1.88847	1.46103	0.502551	0.509275	0.335871	0.65067	0.40597	0.933225	0.452915	0.685446	0.525424	0.3	0.159696	0.0614035	0.537313	0.521739	1.72133	1.68954	1.35046	1.27689	1.3566	1.15412	1.13831	1.51296	1.38029	1.32034	1.20201	1.22064	1.10434	1.0135	1.31065	1.56543
3.47286e-52	2.11109	0.316	0.079	1.17021e-47	cTEC	Ada	46.9317	0.708885	0.364435	0.0204082	0.13828	0.0211703	0.233259	0.348827	0.205212	0.0224215	0.0422535	0.101695	0.257143	0.178707	0.00877193	0.0597015	0	1.26379	1.18006	1.01911	1.06081	1.01925	1.05652	1.10259	1.09218	1.02636	1.02576	1.02893	1.05975	1.15459	1.00146	1.03735	1
5.75474e-52	1.08807	0.739	0.471	1.93912e-47	cTEC	Washc3	46.7124	2.30435	1.81339	0.602041	1.17201	0.437203	2.13281	1.65672	0.714984	0.372197	0.605634	1.05085	0.525	0.281369	1.07018	0.537313	0.173913	1.76288	1.76876	1.36994	1.51368	1.35274	1.45512	1.41863	1.35625	1.30678	1.27367	1.32217	1.20227	1.21384	1.26878	1.2624	1.22716
6.50213e-52	1.11192	0.308	0.085	2.19096e-47	cTEC	Plau	46.6594	0.568998	0.33809	0.117347	0.112985	0.108944	0.0613839	0.150107	0.299674	0.295964	0.00938967	0.20339	0	0.0304183	0.00877193	0.597015	0.0869565	1.2095	1.16291	1.09456	1.05963	1.11675	1.01789	1.04903	1.18998	1.33711	1.00383	1.08995	1	1.00791	1.00143	1.24763	1.09969
6.52843e-52	1.79037	0.429	0.167	2.19982e-47	cTEC	Rmdn3	46.6576	0.94707	0.279912	0.130102	0.448567	0.070647	0.481027	0.313433	0.210098	0.0493274	0.29108	0.305085	0.15	0.148289	0.403509	0.149254	0	1.30163	1.13857	1.07848	1.20933	1.06524	1.10539	1.09256	1.09854	1.0486	1.14402	1.09972	1.06416	1.13304	1.09966	1.10963	1
7.82634e-52	1.41878	0.437	0.15	2.63716e-47	cTEC	Txnrd3	46.5789	0.73913	0.21405	0.0969388	0.0910624	0.16294	0.352679	0.263539	0.209283	0.0627803	0.159624	0.152542	0.203571	0.0418251	0.280702	0.164179	0	1.29264	1.11419	1.074	1.05081	1.15935	1.08875	1.08328	1.14356	1.06871	1.08013	1.05625	1.10048	1.03271	1.07194	1.14514	1
9.14614e-52	1.01277	0.667	0.334	3.08188e-47	cTEC	Tnfrsf1a	46.5112	1.67486	1.58178	0.505102	1.31029	0.447907	0.553571	0.31855	0.399837	0.219731	0.42723	1.35593	0.332143	0.235741	0.657895	1.85075	1.21739	1.58469	1.74071	1.34071	1.60864	1.35231	1.13766	1.10171	1.21386	1.21029	1.20781	1.41512	1.18537	1.28034	1.17142	1.86398	2.24035
1.03921e-51	2.31515	0.346	0.11	3.50172e-47	cTEC	Cd83	46.4557	2.10775	0.0954995	0.0153061	0.0455312	0.0076118	0.260045	1.57953	0.334691	0.0403587	0.0751174	0.0508475	0.0428571	1.68061	0.0789474	0.0447761	0	1.58757	1.04805	1.00876	1.02284	1.0127	1.06208	1.41407	1.16088	1.03911	1.04814	1.01332	1.04659	1.56514	1.01567	1.01443	1
2.0039e-51	1.57092	0.42	0.139	6.75235e-47	cTEC	Vmac	46.1705	0.716446	0.4764	0.130102	0.205734	0.147241	0.246652	0.124094	0.0708469	0.0358744	0.370892	0.389831	0.221429	0.0532319	0.421053	0.0597015	0.130435	1.29534	1.24832	1.0981	1.10771	1.14244	1.05716	1.04021	1.04455	1.03711	1.19227	1.1208	1.10078	1.04411	1.1041	1.03938	1.24988
2.17129e-51	1.3881	0.45	0.159	7.31639e-47	cTEC	Ccnjl	46.1357	0.918715	0.265642	0.132653	0.241147	0.215985	0.399554	0.448614	0.214169	0.0224215	0.0375587	0.101695	0.15	0.0456274	0.0438596	0	0	1.39935	1.15247	1.10027	1.12833	1.25023	1.10979	1.14696	1.12082	1.01648	1.01389	1.01988	1.08204	1.05146	1.00992	1	1
2.96723e-51	1.39237	0.531	0.224	9.99838e-47	cTEC	Dbndd2	46.0001	1.30435	0.819978	1.08418	0.959528	0.162702	0.34933	0.233262	0.336319	0.201794	0.511737	0.694915	0.935714	0.0760456	0.5	1.0597	0.130435	1.44388	1.39868	1.51602	1.46118	1.12583	1.08129	1.06939	1.16223	1.1541	1.25223	1.25878	1.45123	1.04439	1.12933	1.7173	1.21568
4.98748e-51	1.42256	0.52	0.216	1.68058e-46	cTEC	Kif26a	45.7745	1.26087	0.19978	0.0382653	0.11973	0.138202	1.54799	1.02772	0.549674	0.0807175	0.338028	0.389831	0.160714	0.0228137	0.0438596	0.0447761	0.26087	1.46135	1.11046	1.03217	1.07006	1.14513	1.34107	1.29211	1.29208	1.08497	1.15803	1.13209	1.06774	1.0124	1.00725	1.01718	1.35907
8.20873e-51	1.07006	0.578	0.258	2.76601e-46	cTEC	Ubald1	45.5581	1.11153	0.893524	0.464286	0.789207	0.252379	0.339286	0.241791	0.413681	0.264574	0.521127	0.711864	0.353571	0.376426	0.403509	0.223881	0.130435	1.42421	1.42604	1.30663	1.35716	1.23126	1.09255	1.08342	1.22801	1.20151	1.24235	1.24787	1.19028	1.34516	1.12636	1.10969	1.31381
8.37871e-51	1.1918	0.673	0.375	2.82329e-46	cTEC	Ralb	45.5492	1.97921	0.455543	0.318878	0.682968	0.286156	3.3125	1.5693	0.834691	0.381166	0.389671	0.525424	0.317857	0.220532	0.342105	0.686567	0.652174	1.65968	1.23218	1.1956	1.31043	1.26392	1.61934	1.40176	1.38661	1.2883	1.17645	1.14242	1.13646	1.19737	1.083	1.33219	1.72981
1.10729e-50	1.17854	0.669	0.385	3.73113e-46	cTEC	Pnrc2	45.4282	1.83932	0.933041	0.375	0.954469	0.292103	1.66183	1.1791	0.48127	0.237668	0.737089	1.45763	0.742857	0.418251	0.859649	0.641791	0.391304	1.59395	1.44238	1.23608	1.42439	1.24083	1.34641	1.30744	1.22096	1.17526	1.31626	1.40984	1.31903	1.37951	1.22773	1.3372	1.51702
1.41142e-50	1.45499	0.319	0.086	4.75593e-46	cTEC	Heyl	45.3228	0.561437	0.0230516	0.0280612	0.686341	0.151522	0.0736607	0.10064	0.0895765	0	0.0375587	0.0338983	0.00714286	0.0190114	0.00877193	0.268657	0	1.25771	1.01062	1.01877	1.38823	1.16604	1.02502	1.03786	1.05539	1	1.0167	1.01248	1.00458	1.00805	1.00146	1.14037	1
1.85764e-50	1.38321	0.535	0.227	6.25952e-46	cTEC	Arhgef16	45.2035	1.00189	0.475302	0.262755	0.271501	0.141056	0.529018	0.438806	0.473941	0.26009	0.596244	0.711864	0.282143	0.00760456	0.192982	0.0895522	0	1.41037	1.26177	1.1885	1.12942	1.15297	1.13658	1.13535	1.28174	1.25637	1.25785	1.20557	1.20386	1.00421	1.05868	1.10756	1
2.01467e-50	2.02513	0.357	0.113	6.78865e-46	cTEC	Prr29	45.1682	0.68431	0.105379	0.0943878	0.11973	0.0356803	0.331473	0.472921	0.171824	0.0224215	0.2723	0.186441	0.05	0.0114068	0.0789474	0.0149254	0	1.25236	1.06074	1.0596	1.05488	1.03114	1.08753	1.13407	1.0828	1.01786	1.10746	1.05994	1.01404	1.01071	1.02994	1.01514	1
2.26166e-50	1.68527	0.346	0.097	7.62089e-46	cTEC	Trib2	45.118	0.672968	0.211855	0.127551	0.677909	0.0732636	0.22433	0.109595	0.0496743	0.058296	0.0704225	0.152542	0.242857	0.13308	0.0263158	0.104478	0.26087	1.26529	1.11021	1.08954	1.3236	1.08887	1.06199	1.03552	1.03577	1.09225	1.04305	1.06399	1.15136	1.18911	1.01869	1.04	1.38806
6.98192e-50	1.17155	0.418	0.146	2.35263e-45	cTEC	Dock8	44.6284	0.8431	0.851811	1.23724	0.740304	0.0613701	0.09375	0.254158	0.153909	0.125561	0.169014	0.0338983	0.1	1.06084	0.105263	0.0746269	0.0869565	1.37127	1.46143	1.72447	1.38893	1.07937	1.02923	1.09643	1.09961	1.10986	1.08445	1.00853	1.09669	1.8053	1.04288	1.05008	1.13155
8.12795e-50	1.18942	0.633	0.322	2.73879e-45	cTEC	Inpp1	44.5624	1.64272	1.21844	0.234694	0.559865	0.321361	0.507812	0.692964	0.59202	0.103139	0.446009	1.25424	0.342857	0.235741	0.219298	0.298507	0.521739	1.5677	1.57622	1.1816	1.26261	1.29957	1.1205	1.21362	1.29736	1.08832	1.19388	1.38631	1.19777	1.25758	1.05989	1.1055	1.69969
8.18323e-50	1.0279	0.338	0.093	2.75742e-45	cTEC	Igfbp7	44.5595	2.28922	1.77387	4.22449	0.591906	0.0858706	0.0993304	0.267377	0.0602606	0.00896861	0.0516432	0.271186	0.0678571	0.0342205	0.0438596	52.9851	39	1.77906	1.71942	2.54357	1.35358	1.06348	1.02765	1.08688	1.03227	1.01346	1.02331	1.09351	1.05642	1.01772	1.00715	5.45042	6.2395
8.40301e-50	1.46271	0.284	0.069	2.83148e-45	cTEC	Zfp385b	44.548	0.655955	0.709111	0.0484694	0.165261	0.0677926	0.0904018	0.223454	0.0675896	0	0.0469484	0.101695	0.567857	0.0190114	0	0.0746269	0	1.25865	1.36116	1.04183	1.04985	1.0893	1.02487	1.10002	1.04321	1	1.03614	1.01946	1.25028	1.01723	1	1.02902	1
1.98062e-49	1.86117	0.323	0.086	6.6739e-45	cTEC	Smim1	44.1756	0.601134	0.879254	0.22449	0.355818	0.0280685	0.0301339	0.0426439	0.0276873	0.0044843	0.140845	0.338983	0.0357143	0.0114068	1.54386	0.373134	0	1.23135	1.40121	1.14335	1.16757	1.01991	1.00881	1.01202	1.02182	1.00068	1.08073	1.11214	1.01043	1.00578	1.35158	1.16317	1
2.14764e-49	1.09164	0.716	0.421	7.23669e-45	cTEC	Snx9	44.1405	2.12854	1.21076	0.619898	0.699831	0.45314	1.13281	1.0371	0.557003	0.511211	0.779343	1.05085	0.675	0.186312	0.535088	1.38806	0.347826	1.73292	1.58137	1.42833	1.34374	1.45608	1.26914	1.307	1.32251	1.44818	1.36863	1.35041	1.36448	1.10932	1.15329	1.61246	1.38476
2.99937e-49	1.17062	0.48	0.187	1.01067e-44	cTEC	Lppos	43.9954	0.882798	0.520307	0.344388	0.74199	0.205519	0.252232	0.162473	0.135993	0.161435	0.300469	0.644068	0.221429	0.0874525	0.578947	0.313433	0	1.33117	1.26949	1.24889	1.33428	1.20435	1.0673	1.0522	1.07531	1.1397	1.13405	1.22827	1.10969	1.07667	1.15464	1.10755	1
3.13824e-49	1.9823	0.31	0.079	1.05746e-44	cTEC	Adamts2	43.9757	0.482042	0.136114	0.0102041	0.0674536	0.0518554	0.177455	0.286141	0.0537459	0	0.00938967	0.0508475	0.0142857	0.00760456	0.0789474	1.85075	0	1.24646	1.06442	1.01492	1.03283	1.06524	1.04807	1.11071	1.04195	1	1.00285	1.01541	1.00671	1.0032	1.01367	1.77615	1
6.24643e-49	1.08263	0.732	0.447	2.1048e-44	cTEC	Lrpap1	43.6768	2.27032	2.05928	0.836735	1.64081	0.489772	1.45871	1.27164	0.401466	0.197309	0.995305	2.33898	0.714286	0.406844	2.88596	1.55224	0.478261	1.76722	1.85638	1.48221	1.70611	1.38392	1.31524	1.33218	1.19351	1.14335	1.44728	1.66267	1.27975	1.28584	1.62842	1.68401	1.59563
1.23463e-48	1.19649	0.633	0.339	4.1602e-44	cTEC	Snap47	43.3809	1.55955	1.09989	0.34949	0.863406	0.259277	1.0067	0.974414	0.324104	0.179372	0.502347	0.661017	0.367857	0.0912548	0.885965	0.358209	0.0869565	1.50864	1.49483	1.24338	1.39538	1.20923	1.22327	1.25853	1.15341	1.15153	1.2271	1.23197	1.14546	1.06392	1.24021	1.20091	1.20052
1.79666e-48	1.4001	0.527	0.232	6.05404e-44	cTEC	Tcn2	43.218	1.08129	0.514819	0.484694	0.676223	0.129401	0.289062	0.536034	0.401466	0.0896861	0.370892	2.16949	0.182143	0.0760456	0.947368	1.38806	0.608696	1.40091	1.26387	1.27562	1.32363	1.11659	1.07251	1.15533	1.20286	1.06421	1.20131	1.62124	1.10057	1.05048	1.22867	1.59534	1.67203
3.3941e-48	1.56236	0.488	0.23	1.14368e-43	cTEC	Got1	42.9417	1.29679	0.353458	0.130102	0.416526	0.0516175	1.01116	0.729638	0.529316	0.134529	0.741784	2.83051	0.371429	0.490494	0.526316	0.313433	0.0869565	1.41637	1.16128	1.0819	1.20032	1.04725	1.22304	1.20524	1.26225	1.08864	1.3154	1.75755	1.13976	1.35006	1.14513	1.15813	1.10648
8.18263e-48	1.08563	0.535	0.231	2.75722e-43	cTEC	Ganc	42.5595	1.11909	0.678375	0.252551	1.24452	0.226213	0.373884	0.340725	0.331433	0.264574	0.187793	0.254237	0.246429	0.163498	0.535088	0.0597015	0.130435	1.43514	1.32221	1.19373	1.53363	1.26233	1.0997	1.10627	1.21361	1.25595	1.0998	1.08185	1.15789	1.1247	1.16745	1.03012	1.17459
4.99951e-47	1.25892	0.514	0.217	1.68464e-42	cTEC	Ivd	41.7735	1.1172	0.904501	0.265306	1.03035	0.142721	0.395089	0.227719	0.201954	0.183857	1.23474	0.576271	0.535714	0.269962	1.14912	0.283582	0.130435	1.42587	1.43869	1.18605	1.45653	1.16126	1.09595	1.07409	1.12185	1.17315	1.5153	1.18975	1.38697	1.25333	1.32444	1.22573	1.27942
1.51314e-46	1.18782	0.633	0.349	5.09867e-42	cTEC	Hsd17b8	41.2925	1.51607	0.71899	0.471939	0.839798	0.244767	0.925223	0.883156	0.372964	0.215247	0.995305	1.74576	0.775	0.220532	2.4386	0.38806	0.26087	1.5258	1.35475	1.27807	1.40195	1.2249	1.21597	1.24008	1.18318	1.13	1.45934	1.53866	1.37194	1.16107	1.54231	1.21255	1.43212
2.27999e-46	1.15725	0.463	0.181	7.68265e-42	cTEC	Atp13a2	41.1145	0.833648	0.442371	0.244898	0.492411	0.161513	0.33817	0.207249	0.147394	0.0313901	0.319249	0.338983	0.375	0.114068	0.219298	0.149254	0.0434783	1.31864	1.22147	1.17772	1.22976	1.19551	1.1111	1.06944	1.10438	1.01561	1.17312	1.09531	1.27025	1.08945	1.063	1.10021	1.04746
2.79684e-46	1.59931	0.393	0.133	9.42422e-42	cTEC	Ndufaf6	41.0258	0.604915	0.188804	0.196429	0.187184	0.100856	0.698661	0.189339	0.0635179	0.058296	0.178404	0.457627	0.114286	0.121673	0.315789	0.179104	0.0869565	1.25051	1.10301	1.13542	1.09998	1.10005	1.15951	1.05364	1.03846	1.03589	1.09701	1.1414	1.04292	1.06681	1.11866	1.09567	1.19729
7.11947e-46	1.0855	0.478	0.194	2.39898e-41	cTEC	Tbc1d2b	40.62	0.769376	0.339188	0.260204	0.121417	0.253806	0.592634	0.185928	0.240228	0.0852018	0.0516432	0.305085	0.0928571	0.163498	0.105263	0.462687	0.130435	1.36891	1.18601	1.20232	1.07254	1.2917	1.16632	1.07182	1.17708	1.09079	1.0263	1.10316	1.05617	1.14982	1.03254	1.22225	1.20303
1.20958e-45	1.44543	0.359	0.114	4.07581e-41	cTEC	Bahd1	40.3898	0.544423	0.135016	0.140306	0.118044	0.122027	0.15625	0.132623	0.157166	0.156951	0.2723	0.305085	0.228571	0.0304183	0.114035	0.0597015	0	1.24711	1.0748	1.11654	1.06404	1.13604	1.0434	1.05234	1.09071	1.16618	1.12675	1.12527	1.16379	1.03081	1.03436	1.03887	1
2.89044e-45	1.01106	0.584	0.278	9.73963e-41	cTEC	Ier3	40.0115	3.58979	3.42042	1.39286	6.2344	0.669363	0.643973	0.478038	1.19137	0.331839	0.248826	5.40678	0.560714	0.410646	2.10526	0.955224	2.52174	2.08411	2.20873	1.86512	2.73756	1.64436	1.15273	1.14832	1.57249	1.17019	1.11966	2.22591	1.28666	1.17719	1.43011	1.56606	2.77578
4.16143e-45	1.10384	0.442	0.171	1.40224e-40	cTEC	Acad11	39.8532	0.731569	0.77607	0.181122	0.220911	0.169838	0.1875	0.224733	0.175081	0.0672646	0.215962	0.288136	0.210714	0.0608365	0.254386	0.0298507	0.0434783	1.30697	1.38601	1.1497	1.10843	1.1929	1.05247	1.07331	1.11156	1.0829	1.10841	1.09958	1.14738	1.05585	1.0811	1.02229	1.08296
5.63056e-45	1.29978	0.609	0.309	1.89727e-40	cTEC	Csrp2	39.7219	2.51418	0.742042	0.288265	0.682968	0.954091	1.2567	1.16461	0.175081	0.0403587	0.126761	2.37288	0.157143	0.095057	0.114035	2.20896	0.304348	1.85929	1.36949	1.20585	1.33109	1.65162	1.297	1.31798	1.10276	1.06451	1.0524	1.67072	1.07058	1.05444	1.03279	2.02987	1.4025
5.75955e-45	1.20934	0.276	0.074	1.94074e-40	cTEC	Pnpla3	39.712	0.431002	0.129528	0.0535714	0.109612	0.0946717	0.171875	0.122388	0.125407	0.0403587	0.0375587	0.0508475	0.875	0.00760456	0.105263	0	0	1.2106	1.08125	1.04526	1.05391	1.12088	1.04945	1.05678	1.08734	1.05194	1.01741	1.01219	1.56876	1.00426	1.03124	1	1
1.07711e-44	1.01161	0.711	0.459	3.62943e-40	cTEC	Arl8a	39.4402	2.22117	1.32492	0.538265	1.03373	0.534967	1.54241	1.21663	0.654723	0.430493	0.906103	1.16949	0.825	0.273764	0.578947	0.80597	0.217391	1.71094	1.59848	1.39031	1.48226	1.43043	1.32928	1.327	1.33214	1.30029	1.36754	1.37071	1.34432	1.25458	1.1732	1.50623	1.29014
1.2659e-44	1.18158	0.48	0.197	4.26556e-40	cTEC	1600014C10Rik	39.37	0.765595	0.373216	0.188776	0.123103	0.223597	0.427455	0.296802	0.235342	0.26009	0.164319	0.423729	0.114286	0.095057	0.122807	0.208955	0.0869565	1.32165	1.18414	1.14579	1.06446	1.21443	1.10171	1.08738	1.14107	1.23403	1.10057	1.14185	1.0735	1.07051	1.03329	1.13805	1.14791
1.4718e-44	1.32984	0.588	0.301	4.95939e-40	cTEC	Zfp318	39.3046	1.67108	0.344676	0.242347	0.214165	0.332303	0.901786	1.55821	0.736971	0.139013	0.56338	0.254237	0.296429	0.0798479	0.377193	0.104478	0.0869565	1.75861	1.20547	1.18673	1.12378	1.41214	1.25433	1.46474	1.43618	1.11126	1.25515	1.08977	1.16823	1.05399	1.10319	1.05727	1.10428
4.84543e-44	1.03246	0.705	0.473	1.63272e-39	cTEC	Commd3	38.7871	2.59168	1.39627	0.75	1.87352	0.49215	2.98214	1.47761	0.758143	0.390135	1.06573	1.9322	0.853571	0.722433	1.85088	1.0597	0.173913	1.76091	1.61356	1.41075	1.74636	1.35072	1.57985	1.36281	1.34202	1.29486	1.44907	1.57297	1.32024	1.45743	1.44336	1.54057	1.34148
5.99551e-44	1.05379	0.724	0.519	2.02025e-39	cTEC	Selenos	38.6946	3.67864	2.71789	1.0051	2.59359	0.454805	2.92411	3.02516	1.20033	0.466368	1.76056	2.84746	1.06786	0.996198	4.65789	2.52239	0.130435	2.00977	2.0111	1.51123	1.93936	1.33462	1.56586	1.71232	1.49999	1.2388	1.65446	1.77503	1.44273	1.59655	1.8913	1.95064	1.15359
7.01919e-44	1.31527	0.259	0.067	2.36519e-39	cTEC	Thbs2	38.6261	0.412098	0.42371	0.0178571	0.232715	0.107517	0.0424107	0.0336887	0.0439739	0.0179372	0.0938967	0	0.0321429	0	0.0614035	1.01493	0	1.1731	1.22873	1.01269	1.114	1.10468	1.01171	1.01446	1.02297	1.00624	1.05601	1	1.01052	1	1.01984	1.381	1
8.06566e-44	1.00523	0.408	0.154	2.7178e-39	cTEC	Ldlrap1	38.5658	0.587902	0.332602	0.270408	0.187184	0.176023	0.292411	0.134755	0.158795	0.0627803	0.122066	0.40678	0.110714	0.0646388	0.184211	0.238806	0.0869565	1.25897	1.18931	1.21767	1.09929	1.20393	1.0872	1.04691	1.10825	1.05629	1.07472	1.1218	1.04874	1.06944	1.051	1.13298	1.13875
1.11584e-43	1.01393	0.514	0.228	3.75994e-39	cTEC	Cobll1	38.4248	1.11531	0.481888	0.423469	0.575042	0.381541	0.501116	0.231557	0.380293	0.161435	0.647887	1.33898	0.721429	0.140684	0.675439	0.253731	0.0869565	1.5108	1.2673	1.27946	1.25997	1.41656	1.1518	1.09155	1.23775	1.14408	1.31834	1.44564	1.35485	1.10536	1.185	1.20977	1.10577
1.67299e-43	1.89045	0.473	0.203	5.63732e-39	cTEC	Gm15943	38.2489	2.67486	0.0351262	0.112245	0.134907	0.590152	2.95871	1.26013	0.434853	0.255605	0.0516432	0.0338983	0.0607143	0.026616	0.00877193	0	0	1.95886	1.01775	1.08785	1.06749	1.44495	1.65033	1.35112	1.24416	1.1689	1.0373	1.00652	1.03206	1.01631	1.00378	1	1
2.68366e-43	1.77833	0.28	0.072	9.04285e-39	cTEC	Gnao1	38.0437	0.761815	0.30955	0.0306122	0.956155	0.0176023	0.0334821	0.108316	0.0537459	0.0134529	2.78873	0	0.0321429	0.0152091	0.0350877	0.19403	0	1.28898	1.18165	1.02272	1.46881	1.02163	1.01358	1.04476	1.03392	1.03054	2.02431	1	1.01482	1.00436	1.01108	1.11528	1
2.87735e-43	1.3951	0.491	0.211	9.69551e-39	cTEC	Nudt18	38.0134	0.931947	0.787047	0.260204	0.521079	0.1853	0.28683	0.278465	0.293974	0.103139	0.338028	0.542373	0.214286	0.0456274	0.394737	0.238806	0.0434783	1.3635	1.3789	1.1731	1.25296	1.148	1.07666	1.08257	1.14421	1.07375	1.15252	1.17676	1.10123	1.02605	1.10749	1.10693	1.04746
5.9175e-43	1.28612	0.484	0.205	1.99396e-38	cTEC	Mafa	37.7003	1.26087	0.28101	0.0102041	0.104553	0.367507	1.7779	0.482729	0.149837	0.0403587	0.0704225	0.152542	0.439286	0.0190114	0.0964912	0.0597015	0	1.49117	1.14901	1.00867	1.05493	1.36545	1.38238	1.14287	1.08333	1.01964	1.03131	1.06887	1.1068	1.03802	1.0203	1.04437	1
8.93437e-43	1.00039	0.709	0.45	3.01053e-38	cTEC	Glod4	37.5214	2.04915	1.22393	0.548469	1.0489	0.321361	2.78795	2.19574	0.645765	0.165919	0.910798	1.9322	0.65	0.460076	1.27193	0.373134	0.391304	1.68171	1.54835	1.34255	1.47834	1.25732	1.53413	1.53042	1.29482	1.13072	1.39447	1.53234	1.27403	1.27245	1.29678	1.14818	1.43534
9.7248e-43	1.06164	0.518	0.232	3.27687e-38	cTEC	Osbpl10	37.4845	1.46503	0.722283	0.660714	0.163575	0.66746	0.345982	0.297228	0.167752	0.0044843	0.347418	0.881356	0.153571	0.026616	0.184211	0.0447761	0.0869565	1.67368	1.36872	1.42167	1.09804	1.67962	1.09736	1.10799	1.09803	1.00727	1.19207	1.26417	1.08888	1.01979	1.06443	1.01676	1.05087
1.62392e-42	1.31191	0.531	0.273	5.47195e-38	cTEC	Tsr3	37.2619	1.12476	0.645445	0.270408	0.709949	0.16627	0.949777	0.509168	0.277687	0.121076	0.615023	0.779661	0.371429	0.224335	0.535088	0.149254	0	1.39855	1.31912	1.17639	1.33078	1.13915	1.2136	1.14418	1.14201	1.07305	1.26695	1.26096	1.13881	1.19167	1.13176	1.06512	1
1.9658e-42	1.33696	0.346	0.114	6.62397e-38	cTEC	Ackr4	37.1789	1.57656	4.4753	0.0637755	0.335582	0.121075	0.0379464	0.0537313	0.0179153	0.00896861	0.0469484	0.169492	0.610714	0.0114068	0.0175439	0.0895522	0	1.51943	2.43244	1.05096	1.16409	1.08747	1.01171	1.01697	1.0129	1.01637	1.01772	1.04701	1.35509	1.00549	1.00286	1.03173	1
2.17511e-42	1.08789	0.359	0.128	7.32923e-38	cTEC	Vat1	37.1349	0.57845	0.341383	0.209184	0.507589	0.150095	0.0691964	0.0400853	0.154723	0.0538117	0.577465	0.305085	0.4	0.0570342	0.22807	1.49254	0.652174	1.23214	1.17624	1.14139	1.25349	1.13583	1.01998	1.01251	1.08752	1.04295	1.28683	1.08183	1.23573	1.04006	1.06315	1.69007	1.80028
2.20559e-42	1.21392	0.323	0.101	7.43197e-38	cTEC	Irx3	37.1289	0.837429	1.0966	0.431122	1.06239	0.0773073	0.152902	0.121109	0.129479	0.134529	0.0657277	0.288136	0.0642857	0.0304183	0.0350877	0.0149254	0.26087	1.27513	1.47423	1.26357	1.44041	1.07249	1.04608	1.03518	1.09156	1.13798	1.02552	1.09716	1.02357	1.01348	1.00835	1.01137	1.36606
2.59979e-42	1.08301	0.58	0.285	8.76024e-38	cTEC	Nsmaf	37.0575	1.25898	0.431394	0.566327	0.370995	0.329924	0.496652	0.65032	0.399023	0.26009	0.652582	0.576271	0.375	0.311787	0.54386	0.507463	0.0434783	1.5555	1.23235	1.38361	1.21774	1.37741	1.13532	1.22811	1.27956	1.25345	1.30883	1.19043	1.25989	1.25082	1.20974	1.24747	1.07333
3.50594e-42	1.06982	0.66	0.375	1.18136e-37	cTEC	Nudt3	36.9276	1.47448	0.659715	0.382653	0.789207	0.33706	1.45424	0.778678	0.474756	0.269058	0.826291	1.08475	0.778571	0.365019	0.692982	0.462687	0.217391	1.5624	1.31847	1.27818	1.35641	1.31816	1.32831	1.23072	1.25036	1.30046	1.35465	1.32911	1.36582	1.30551	1.18357	1.28689	1.42023
6.07468e-42	1.34619	0.353	0.119	2.04692e-37	cTEC	Aldh6a1	36.6889	0.604915	0.601537	0.170918	0.269815	0.101094	0.133929	0.125373	0.0586319	0.0134529	0.15493	0.389831	0.128571	0.0228137	0.973684	0.149254	0.0434783	1.23562	1.31416	1.13061	1.14404	1.10438	1.03181	1.04608	1.03185	1.0147	1.07599	1.12541	1.08138	1.02405	1.266	1.08175	1.08049
6.94757e-42	1.32283	0.527	0.26	2.34105e-37	cTEC	Srp68	36.6306	1.12287	0.496158	0.303571	0.499157	0.172931	0.737723	0.527505	0.254886	0.112108	0.384977	0.728814	0.303571	0.315589	0.561404	0.38806	0.130435	1.40732	1.23976	1.20446	1.23617	1.17917	1.16089	1.15144	1.13716	1.08947	1.21819	1.217	1.14382	1.28499	1.15109	1.18944	1.19344
7.51243e-42	1.32238	0.456	0.189	2.53139e-37	cTEC	Pitrm1	36.5966	0.914934	0.279912	0.153061	0.234401	0.14843	0.614955	0.478038	0.173453	0.0358744	0.178404	0.152542	0.232143	0.18251	0.385965	0.268657	0.0869565	1.33504	1.15246	1.12103	1.11375	1.1639	1.15245	1.15577	1.10253	1.03471	1.08378	1.04726	1.14515	1.11551	1.1052	1.18311	1.07678
2.27083e-41	1.90994	0.285	0.078	7.65179e-37	cTEC	Slc25a29	36.1162	0.470699	0.0823271	0.0612245	0.134907	0.0432921	0.216518	0.109168	0.0822476	0.044843	0.267606	0.559322	0.160714	0.0570342	0.0964912	0.104478	0	1.16518	1.04558	1.04322	1.06447	1.04129	1.05409	1.03616	1.04346	1.03825	1.14318	1.18229	1.06174	1.04606	1.02496	1.06702	1
2.34579e-41	1.03954	0.531	0.246	7.90437e-37	cTEC	Wipf2	36.1021	1.12287	0.739846	0.390306	0.261383	0.256422	0.361607	0.300213	0.343648	0.2287	0.699531	0.59322	0.471429	0.21673	0.394737	0.208955	0.0434783	1.43267	1.39293	1.27576	1.14689	1.28666	1.10471	1.10177	1.21021	1.23683	1.35257	1.18066	1.30896	1.1864	1.12897	1.13052	1.04746
2.79165e-41	1.29449	0.435	0.172	9.40674e-37	cTEC	As3mt	36.0266	0.801512	0.615807	0.196429	0.335582	0.205281	0.282366	0.208529	0.0830619	0.0358744	0.248826	0.457627	0.257143	0.140684	1.01754	0.298507	0.217391	1.30259	1.30392	1.13731	1.17624	1.16537	1.06811	1.05854	1.04727	1.01655	1.13216	1.1468	1.11295	1.08736	1.25151	1.19178	1.34374
4.84715e-41	1.45601	0.327	0.103	1.6333e-36	cTEC	Tpbg	35.7869	0.52552	0.229418	0.127551	0.20742	0.147954	0.22433	0.0886994	0.0390879	0.0044843	0.0375587	0.305085	0.167857	0.00760456	0.0789474	0.477612	0	1.20565	1.12506	1.09103	1.10183	1.12323	1.05446	1.02807	1.02471	1.01074	1.01731	1.08692	1.07642	1.00227	1.01835	1.20259	1
5.95396e-41	1.23471	0.56	0.299	2.00625e-36	cTEC	Alad	35.6976	1.36673	0.42371	0.441327	0.625632	0.179829	1.23772	0.778252	0.59772	0.201794	0.568075	0.762712	0.596429	0.129278	0.789474	0.402985	0.26087	1.46334	1.2258	1.3106	1.30784	1.15729	1.27498	1.21695	1.29412	1.13089	1.25667	1.23583	1.29965	1.06436	1.20061	1.23155	1.35352
8.59557e-41	1.43226	0.44	0.184	2.89636e-36	cTEC	Scrn2	35.5381	0.797732	0.26674	0.112245	0.273187	0.105376	0.643973	0.355224	0.197068	0.107623	0.211268	0.237288	0.271429	0.0646388	0.254386	0.0895522	0.130435	1.26706	1.14934	1.07535	1.15133	1.09578	1.14215	1.09255	1.1068	1.08879	1.09969	1.09097	1.11534	1.05509	1.06172	1.04317	1.16565
1.52791e-40	1.61221	0.301	0.088	5.14844e-36	cTEC	Ppp1r16b	35.2883	0.759924	0.01427	0	0.0219224	0.00594672	0.197545	0.376546	0.326547	0.192825	0.056338	0.0169492	0.0714286	1.60076	0.0175439	0	0.478261	1.29632	1.00479	1	1.01137	1.01198	1.05143	1.12047	1.20213	1.14226	1.04031	1.00293	1.04413	2.2709	1.01644	1	1.47189
3.40208e-40	1.25198	0.507	0.235	1.14636e-35	cTEC	Smco4	34.9407	1.43289	1.48847	0.520408	1.75042	0.118459	0.909598	0.261407	0.175896	0.0493274	0.605634	2.76271	0.182143	0.190114	3.41228	0.537313	2.73913	1.466	1.6586	1.29895	1.67445	1.09996	1.20543	1.07425	1.09109	1.02621	1.2721	1.76133	1.07642	1.13632	1.72298	1.26622	2.90742
3.462e-40	1.0228	0.635	0.345	1.16655e-35	cTEC	Abhd12	34.9331	1.40265	0.960483	0.456633	1.16526	0.290913	0.8125	0.528358	0.680782	0.726457	0.71831	0.898305	0.507143	0.334601	1.14035	0.537313	0.217391	1.55067	1.44717	1.28781	1.49222	1.29561	1.17996	1.15836	1.38055	1.55526	1.34598	1.30614	1.28425	1.24828	1.29897	1.23176	1.31003
3.72009e-40	1.03529	0.369	0.135	1.25352e-35	cTEC	Klhl8	34.9019	0.646503	0.514819	0.112245	0.217538	0.166746	0.191964	0.127079	0.100163	0.0896861	0.126761	0.423729	0.146429	0.0760456	0.149123	0.0895522	0	1.24361	1.28317	1.08678	1.12734	1.18036	1.04631	1.0413	1.07658	1.08441	1.06025	1.12819	1.07179	1.07477	1.05836	1.07027	1
4.63678e-40	1.68256	0.393	0.163	1.56241e-35	cTEC	Mmp9	34.8062	1.34216	0.0592755	0.00255102	0.0202361	0.532588	1.13728	0.531343	0.167752	0.0269058	0.0234742	0	0.0714286	0.00760456	0.0614035	1.62687	0	1.62886	1.02717	1.00221	1.01679	1.41801	1.28376	1.15405	1.07814	1.02006	1.02544	1	1.02718	1.00617	1.01407	1.58636	1
4.66834e-40	1.20454	0.546	0.273	1.57305e-35	cTEC	Fundc1	34.8033	1.08885	0.760703	0.344388	0.903879	0.204567	0.738839	0.422175	0.217427	0.121076	0.262911	0.491525	0.678571	0.269962	0.859649	0.432836	0.173913	1.40113	1.36686	1.2216	1.40558	1.17527	1.1768	1.11759	1.10562	1.07963	1.12621	1.15757	1.29231	1.18309	1.22427	1.23859	1.27453
6.41254e-40	1.09026	0.44	0.181	2.16077e-35	cTEC	Bicd2	34.6654	0.759924	0.532382	0.191327	0.271501	0.148668	0.332589	0.223028	0.320847	0.0852018	0.192488	0.491525	0.125	0.106464	0.105263	0.283582	0.0434783	1.3091	1.27831	1.16205	1.13718	1.18205	1.08856	1.07657	1.21293	1.09408	1.09674	1.15195	1.09141	1.10082	1.03809	1.1527	1.06871
1.55581e-39	1.00943	0.423	0.172	5.24245e-35	cTEC	Mettl7a1	34.2805	0.73535	0.551043	0.688776	0.419899	0.148906	0.234375	0.228571	0.227199	0.121076	0.464789	1.11864	0.196429	0.0874525	0.684211	0.537313	0.130435	1.29382	1.29185	1.39541	1.22029	1.1583	1.07272	1.06711	1.14142	1.0989	1.20744	1.34989	1.10228	1.07491	1.16951	1.3224	1.12653
1.69664e-39	1.10457	0.289	0.093	5.717e-35	cTEC	Snta1	34.2428	0.42344	0.489572	0.0739796	0.645868	0.0920552	0.0513393	0.0481876	0.00732899	0.0044843	0.0610329	0.220339	0.0607143	0.0152091	0.526316	0.402985	0	1.18206	1.25639	1.06516	1.32461	1.10058	1.01527	1.01606	1.00614	1.00293	1.03643	1.093	1.03705	1.00687	1.18689	1.37452	1
1.84003e-39	1.67336	0.346	0.118	6.20016e-35	cTEC	Nphp1	34.2076	0.587902	0.234907	0.204082	0.197302	0.105614	0.274554	0.222601	0.0651466	0	0.178404	0.135593	0.107143	0.0760456	0.877193	0.0895522	0	1.26351	1.12053	1.14336	1.09655	1.1065	1.08283	1.07035	1.04058	1	1.08138	1.04583	1.04315	1.06496	1.21335	1.0713	1
2.66107e-39	1.28598	0.284	0.083	8.96674e-35	cTEC	Ppp1r9a	34.0474	0.480151	0.234907	0.892857	0.436762	0.0390105	0.178571	0.189765	0.026873	0.134529	0.220657	0.542373	0.221429	0.00760456	1.40351	0.507463	0	1.22596	1.13365	1.5276	1.24628	1.05097	1.04738	1.07071	1.02143	1.13278	1.1374	1.16876	1.08179	1.00509	1.53097	1.34449	1
3.01793e-39	1.4567	0.357	0.124	1.01692e-34	cTEC	Minar2	33.9927	0.741021	0.644347	0.145408	0.386172	0.156518	0.309152	0.0763326	0.0561889	0.00896861	0.15493	0.135593	0.192857	0.0190114	0.0350877	0.0149254	0.0434783	1.27174	1.32094	1.09841	1.17486	1.13721	1.07492	1.02444	1.03234	1.00268	1.07127	1.04097	1.06641	1.00839	1.00661	1.00547	1.05222
4.77264e-39	1.09199	0.524	0.248	1.60819e-34	cTEC	Gnpda2	33.7937	0.914934	0.548847	0.153061	0.551433	0.177212	0.745536	0.547974	0.194625	0.0852018	0.403756	0.305085	0.317857	0.148289	0.649123	0.358209	0.217391	1.3218	1.2832	1.10515	1.26433	1.14887	1.16305	1.15232	1.09498	1.10938	1.17293	1.11277	1.13952	1.12848	1.1646	1.20897	1.3989
5.34005e-39	1.23462	0.49	0.223	1.79938e-34	cTEC	Cdc42ep2	33.7449	1.17769	1.03293	0.244898	1.06408	0.145576	0.27567	0.622601	0.314332	0.233184	0.126761	0.101695	0.0892857	0.0760456	0.0964912	1.1194	0.478261	1.3939	1.46913	1.17453	1.46006	1.1243	1.07306	1.1743	1.15033	1.17024	1.06426	1.03687	1.04073	1.05051	1.02397	1.44997	1.64417
5.6903e-39	1.45144	0.507	0.268	1.9174e-34	cTEC	Dpysl2	33.7173	1.95652	1.80571	0.0586735	1.49747	0.177688	1.60938	0.513859	0.141694	0.215247	1.33803	0.169492	0.907143	0.441065	0.0964912	2.70149	0.956522	1.63536	1.7647	1.04991	1.63488	1.14092	1.33737	1.15365	1.07972	1.20265	1.53828	1.05723	1.48458	1.29429	1.02146	2.15212	2.11664
1.00864e-38	1.45625	0.452	0.216	3.39871e-34	cTEC	Aen	33.4687	1.04537	0.244786	0.311224	0.401349	0.10823	1.05469	0.515991	0.314332	0.121076	0.300469	0.661017	0.160714	0.114068	0.412281	0.283582	0.0869565	1.35869	1.13276	1.17158	1.17418	1.10552	1.24651	1.15013	1.1701	1.12315	1.16418	1.24056	1.09922	1.08011	1.10353	1.14358	1.09786
1.65898e-38	1.0084	0.346	0.129	5.59009e-34	cTEC	Gm16136	33.2526	0.587902	0.54775	0.469388	0.920742	0.0980019	0.0904018	0.0588486	0.227199	0.0358744	0.0610329	1.01695	0.153571	0.0114068	0.464912	0.0149254	0	1.21147	1.26952	1.28014	1.39768	1.08501	1.02266	1.01755	1.12781	1.04525	1.03316	1.30162	1.10967	1.01053	1.12851	1.00742	1
2.62296e-38	1.03574	0.482	0.216	8.83831e-34	cTEC	Aldh4a1	33.0536	0.84121	0.375412	0.193878	0.180438	0.193863	0.455357	0.474627	0.327362	0.058296	0.558685	0.288136	0.267857	0.0646388	0.236842	0.134328	0.0869565	1.34706	1.21121	1.12596	1.09686	1.22392	1.1127	1.15076	1.20519	1.07328	1.27537	1.10424	1.1868	1.07378	1.06686	1.11972	1.11848
3.21545e-38	1.44598	0.336	0.113	1.08348e-33	cTEC	Tlcd3a	32.9652	0.514178	0.241493	0.114796	0.10118	0.0723121	0.292411	0.238806	0.175896	0.0403587	0.239437	0.288136	0.396429	0.0114068	0.114035	0.0298507	0.173913	1.21823	1.11897	1.0853	1.0609	1.07362	1.07253	1.07572	1.09706	1.03584	1.15229	1.09948	1.28978	1.00358	1.043	1.01556	1.28621
4.02624e-38	1.19683	0.318	0.105	1.35668e-33	cTEC	Pir	32.8675	0.950851	0.849616	1.60204	1.11467	0.0475737	0.0703125	0.063113	0.337134	0.0044843	0.159624	0.728814	0.757143	0.0304183	0.0175439	0.268657	0	1.34093	1.41844	1.81696	1.4579	1.05936	1.01768	1.01889	1.19757	1.00095	1.07479	1.24296	1.49121	1.02118	1.00286	1.24616	1
6.62562e-38	1.2878	0.486	0.234	2.23257e-33	cTEC	Rrs1	32.6512	0.99811	0.472009	0.234694	0.551433	0.166984	1.35938	0.384648	0.184853	0.0627803	0.244131	0.694915	0.257143	0.304183	0.333333	0.119403	0.304348	1.35429	1.24053	1.15143	1.24047	1.14503	1.30047	1.11204	1.0939	1.04084	1.1203	1.21962	1.08111	1.21572	1.08228	1.06649	1.39838
1.47961e-37	1.09936	0.476	0.214	4.9857e-33	cTEC	Aldh7a1	32.3023	0.771267	0.678375	0.306122	0.49747	0.163178	0.503348	0.268657	0.122964	0.0941704	0.328638	0.338983	0.210714	0.197719	1.68421	0.641791	0.0434783	1.30486	1.34457	1.20037	1.23571	1.15079	1.12571	1.07942	1.06427	1.08142	1.17373	1.1097	1.09185	1.2013	1.40523	1.33697	1.10201
5.56714e-37	1.12987	0.784	0.573	1.8759e-32	cTEC	Irf1	31.7268	5.78639	2.97366	1.35459	5.91231	0.751189	4.04688	2.72324	2.30049	1.16592	2.15493	3.01695	1.05714	1.36122	1.70175	0.791045	0.956522	2.44879	2.09217	1.80569	2.56762	1.69957	1.7789	1.6988	2.01668	1.78821	1.81644	1.84159	1.6287	1.99033	1.3866	1.48292	2.02305
5.77666e-37	1.01631	0.544	0.273	1.9465e-32	cTEC	Fbxo9	31.7107	1.10397	0.663008	0.311224	0.846543	0.179591	0.561384	0.498934	0.31759	0.152466	0.765258	1.18644	0.535714	0.285171	1.03509	0.358209	0.217391	1.3712	1.33776	1.19743	1.37492	1.16589	1.1325	1.14311	1.16918	1.11196	1.3357	1.42115	1.25235	1.3033	1.29066	1.18166	1.3071
5.96094e-37	1.04471	0.622	0.376	2.0086e-32	cTEC	Pmpcb	31.6971	1.49716	0.841932	0.306122	0.932546	0.236441	2.1596	1.28486	0.391694	0.210762	0.755869	1.66102	0.707143	0.311787	1.20175	0.656716	0.26087	1.50188	1.39363	1.19478	1.4159	1.18312	1.42258	1.31309	1.17708	1.12189	1.363	1.48779	1.23731	1.19779	1.29587	1.35071	1.35114
6.28229e-37	1.05931	0.452	0.198	2.11688e-32	cTEC	Fam110b	31.6743	0.962193	0.87596	0.607143	1.44351	0.1451	0.296875	0.480597	0.139251	0.058296	0.234742	0.305085	0.121429	0.0608365	0.640351	0.761194	0	1.40945	1.46522	1.32797	1.68862	1.18353	1.09762	1.15183	1.09098	1.03425	1.12136	1.12213	1.04737	1.04103	1.22337	1.32349	1
7.46069e-37	1.0931	0.575	0.305	2.51395e-32	cTEC	Enpp4	31.5996	1.24764	0.392975	0.270408	0.453626	0.297336	2.62277	0.840512	0.263844	0.0941704	0.455399	1.20339	0.317857	0.125475	0.166667	0.61194	0.130435	1.47726	1.19728	1.19305	1.23077	1.25181	1.53001	1.2402	1.13683	1.05764	1.22161	1.38028	1.16088	1.12111	1.04099	1.24707	1.15115
8.1593e-37	1.43742	0.282	0.087	2.74936e-32	cTEC	Pwwp2b	31.5608	0.36673	0.250274	0.232143	0.234401	0.0623216	0.0926339	0.0993603	0.0765472	0.0134529	0.0657277	0.355932	0.0392857	0.0190114	0.149123	0.0895522	0.130435	1.16658	1.12809	1.16119	1.13001	1.06954	1.02878	1.03426	1.04782	1.01728	1.03024	1.11687	1.02517	1.01547	1.03694	1.03473	1.15387
1.1857e-36	1.09326	0.569	0.297	3.99534e-32	cTEC	Rufy3	31.3984	1.27788	0.371021	0.344388	0.290051	0.296384	0.882812	0.719403	0.679153	0.358744	1.24883	0.79661	0.310714	0.155894	0.508772	0.283582	0.130435	1.56283	1.20429	1.24234	1.15012	1.34561	1.2181	1.25726	1.39087	1.32442	1.5225	1.2401	1.18786	1.1147	1.17834	1.18138	1.13602
1.25106e-36	1.07238	0.667	0.404	4.21556e-32	cTEC	Fbxw7	31.3751	2.16824	0.806806	0.831633	0.586847	0.469553	0.976562	1.04904	0.819218	0.587444	2.26291	1.0339	0.917857	1.0038	10.4912	0.552239	0.304348	1.84857	1.41119	1.5446	1.28127	1.49916	1.24708	1.351	1.44251	1.48413	1.89892	1.33546	1.51898	1.76361	2.81917	1.26747	1.38503
1.35024e-36	2.15412	0.302	0.141	4.54978e-32	cTEC	Nkx6-2	31.342	2	0.0603732	0.00255102	0.0151771	0.0846813	3.62612	1.80768	0.368078	0.00896861	0.112676	0	0.721429	0	0.0350877	0	0	1.7644	1.02829	1.00102	1.00765	1.07381	1.68348	1.45406	1.15482	1.01053	1.05126	1	1.25669	1	1.00583	1	1
1.55865e-36	1.0642	0.597	0.345	5.25204e-32	cTEC	Akr7a5	31.2797	1.41021	0.832053	0.451531	0.715008	0.223834	1.46205	1.08699	0.435668	0.165919	0.704225	1.79661	0.810714	0.228137	1.15789	0.447761	0.130435	1.48053	1.40377	1.28998	1.33998	1.17788	1.31624	1.28552	1.19966	1.12018	1.34249	1.52121	1.31742	1.11033	1.27761	1.2313	1.22503
1.77697e-36	1.42311	0.259	0.074	5.98769e-32	cTEC	Zfp30	31.2227	0.36673	0.211855	0.0280612	0.180438	0.0922931	0.103795	0.0767591	0.00977199	0.0044843	0.13615	0.186441	0.117857	0.0304183	0.219298	0.179104	0.0869565	1.15573	1.11326	1.02979	1.09422	1.09459	1.02289	1.02331	1.00573	1.00447	1.07135	1.04689	1.03951	1.03699	1.08213	1.08923	1.10983
2.43424e-36	1.07741	0.371	0.142	8.2024e-32	cTEC	Rbm20	31.0861	0.586011	0.158068	0.0535714	0.193929	0.0834919	0.436384	0.591045	0.275244	0.0224215	0.117371	0.101695	0.107143	0.0190114	0.149123	0	0	1.22625	1.092	1.04491	1.10654	1.10013	1.11414	1.17186	1.15238	1.01285	1.06976	1.03146	1.04205	1.01418	1.0396	1	1
3.18778e-36	1.15239	0.319	0.111	1.07416e-31	cTEC	Mblac2	30.9689	0.459357	0.356751	0.114796	0.251265	0.0756422	0.179688	0.159488	0.0570033	0.0269058	0.215962	0.0847458	0.189286	0.0760456	0.631579	0.0597015	0	1.18105	1.19669	1.09275	1.13122	1.08839	1.0488	1.05121	1.03977	1.02061	1.14699	1.02924	1.10722	1.0729	1.23335	1.02966	1
6.00101e-36	1.12505	0.558	0.319	2.0221e-31	cTEC	Gltp	30.6942	1.51796	0.42371	0.451531	0.586847	0.107041	1.9096	1.04606	1.25326	0.358744	0.225352	0.915254	0.396429	0.669202	0.640351	0.537313	0.391304	1.48849	1.2119	1.25424	1.27996	1.08696	1.3975	1.29102	1.51741	1.26876	1.10166	1.25242	1.18836	1.42651	1.14953	1.27521	1.61952
7.14877e-36	1.05312	0.526	0.26	2.40885e-31	cTEC	2310039H08Rik	30.6182	0.988658	0.601537	0.382653	0.757167	0.199096	0.704241	0.491258	0.202769	0.0941704	0.577465	1.16949	0.314286	0.220532	1.30702	0.492537	0.0869565	1.35155	1.29149	1.2418	1.3473	1.17441	1.15928	1.13623	1.1021	1.09304	1.27657	1.37564	1.11265	1.17072	1.29049	1.21835	1.11702
1.39036e-35	1.33406	0.348	0.127	4.68495e-31	cTEC	Tab1	30.3293	0.593573	0.254665	0.178571	0.25801	0.135585	0.236607	0.110874	0.0952769	0.0538117	0.201878	0.288136	0.167857	0.0798479	0.140351	0.179104	0.0434783	1.2602	1.14412	1.11673	1.12144	1.16093	1.06165	1.04339	1.07145	1.06922	1.09308	1.11509	1.09431	1.09482	1.04022	1.16437	1.10201
1.59568e-35	1.18735	0.427	0.182	5.37682e-31	cTEC	Mroh1	30.2695	0.714556	0.387486	0.232143	0.13828	0.172693	0.25	0.271642	0.251629	0.197309	0.29108	0.525424	0.307143	0.0798479	0.22807	0.119403	0.0434783	1.32043	1.20598	1.17806	1.07486	1.18778	1.06713	1.0963	1.16736	1.18337	1.13843	1.17778	1.20747	1.0865	1.09964	1.06099	1.08296
1.79079e-35	1.36057	0.416	0.174	6.03423e-31	cTEC	Scx	30.2194	1.86957	1.32492	0.237245	0.246206	0.93863	0.0602679	0.0324094	0.0138436	0.0134529	0.0328638	0.559322	0.025	0.00760456	0.377193	0.0447761	0	1.73505	1.60733	1.19014	1.1168	1.65517	1.01731	1.0131	1.00859	1.00811	1.01338	1.17896	1.01143	1.00268	1.08808	1.02216	1
1.8631e-35	1.14654	0.327	0.116	6.27789e-31	cTEC	Gm12840	30.2022	0.803403	0.394072	0.196429	0.775717	0.0820647	0.223214	0.406397	0.381107	0.121076	0.305164	0.728814	0.0821429	0.494297	0.0175439	0.149254	0.0434783	1.28961	1.19933	1.14128	1.30213	1.08732	1.05256	1.13724	1.19433	1.08189	1.14988	1.23348	1.05539	1.47191	1.00313	1.1969	1.05969
3.67768e-35	1.79672	0.274	0.082	1.23923e-30	cTEC	Cpeb1	29.9068	0.586011	0.251372	0.0382653	0.0640809	0.0737393	0.0691964	0.271642	0.165309	0.0224215	0.413146	0.0677966	0.0178571	0.0190114	0.0614035	0.432836	0.0434783	1.26837	1.12937	1.03707	1.03674	1.07809	1.01491	1.11595	1.10007	1.02054	1.20414	1.02408	1.01254	1.01555	1.01182	1.30148	1.05222
6.12224e-35	1.08685	0.25	0.081	2.06295e-30	cTEC	Vldlr	29.6855	0.417769	0.757409	0.102041	0.198988	0.102759	0.0133929	0.041791	0.0203583	0.0224215	0.112676	0.0677966	0.0107143	0	0.114035	0.223881	0	1.179	1.37893	1.06598	1.09796	1.11303	1.00528	1.01485	1.01401	1.03782	1.04832	1.02036	1.00934	1	1.03015	1.10898	1
6.41315e-35	1.08491	0.563	0.311	2.16098e-30	cTEC	Scoc	29.6654	1.32325	0.929748	0.206633	0.875211	0.239058	1.74554	0.71855	0.179967	0.0896861	0.558685	0.576271	0.55	0.136882	1.22807	0.731343	0.26087	1.44018	1.44185	1.15428	1.37275	1.18582	1.36452	1.20317	1.08419	1.07692	1.24293	1.171	1.22609	1.09444	1.29188	1.47213	1.35328
7.32971e-35	1.7863	0.295	0.099	2.46982e-30	cTEC	Rgs9	29.6073	0.538752	0.159166	0.0280612	0.183811	0.0166508	0.302455	0.346269	0.0700326	0.0179372	0.248826	0.423729	0.782143	0.026616	0	0	0	1.21462	1.07848	1.02526	1.07648	1.01868	1.07374	1.11287	1.05741	1.01517	1.14513	1.16365	1.37659	1.02123	1	1	1
1.14944e-34	1.30342	0.412	0.174	3.87314e-30	cTEC	Ctnnal1	29.4119	0.810964	0.433589	0.170918	0.561551	0.126546	0.743304	0.678038	0.155537	0.0224215	0.164319	0.169492	0.375	0.0608365	0.27193	0.19403	0	1.36577	1.23222	1.11801	1.26706	1.1373	1.17992	1.20829	1.09187	1.03082	1.07449	1.0642	1.16908	1.06297	1.08552	1.3057	1
1.33173e-34	1.08015	0.552	0.294	4.48741e-30	cTEC	Sms	29.348	1.41777	0.852909	0.380102	0.892074	0.165081	2.66853	0.7629	0.217427	0.0538117	0.356808	1.0339	0.825	0.555133	1.00877	0.149254	0.0434783	1.46582	1.41148	1.25823	1.38516	1.16075	1.50238	1.20794	1.12019	1.02601	1.17639	1.29878	1.34927	1.40202	1.28272	1.0792	1.04746
2.74868e-34	1.20104	0.454	0.206	9.26194e-30	cTEC	Gm1673	29.0333	1.22117	1.62569	0.0663265	0.671164	0.332303	0.678571	0.168017	0.0211726	0	0.2723	0.152542	0.510714	0.0418251	1.33333	0.402985	0.173913	1.43749	1.68677	1.04436	1.31415	1.25328	1.15044	1.05134	1.01471	1	1.15644	1.05765	1.16292	1.02945	1.32604	1.2121	1.24546
3.23469e-34	1.64272	0.371	0.16	1.08996e-29	cTEC	Fasn	28.9626	0.899811	0.240395	0.204082	0.650927	0.0861085	0.533482	0.233689	0.131107	0.0358744	0.187793	0.40678	0.303571	0.102662	0.184211	0.328358	0.0869565	1.33521	1.14305	1.16122	1.31146	1.10825	1.14234	1.07638	1.07777	1.02898	1.0906	1.14462	1.19495	1.07281	1.04308	1.14715	1.17175
4.07266e-34	1.08206	0.355	0.139	1.37232e-29	cTEC	Snx21	28.8625	0.567108	0.443469	0.204082	0.330523	0.145576	0.133929	0.144989	0.129479	0.0627803	0.215962	0.254237	0.121429	0.0722433	0.385965	0.402985	0.0434783	1.24411	1.25752	1.147	1.1744	1.15489	1.03964	1.04924	1.08686	1.07435	1.10134	1.10011	1.07152	1.05602	1.12977	1.17561	1.14474
5.01648e-34	1.70643	0.35	0.145	1.69035e-29	cTEC	2310040G24Rik	28.772	0.701323	0.0450055	0.0586735	0.112985	0.142483	0.977679	0.430704	0.15228	0.0403587	0.103286	0.20339	0.275	0.026616	0.175439	0.0597015	0	1.31625	1.02376	1.049	1.05274	1.1239	1.22651	1.12005	1.07356	1.03635	1.0491	1.06456	1.09673	1.01055	1.04232	1.03514	1
6.16817e-34	1.46666	0.293	0.096	2.07843e-29	cTEC	Actr5	28.6823	0.395085	0.0998902	0.0867347	0.0961214	0.0696955	0.236607	0.146695	0.0855049	0.0269058	0.15493	0.152542	0.128571	0.220532	0.192982	0.0895522	0.0434783	1.19357	1.05241	1.08613	1.0514	1.08885	1.06473	1.05625	1.05682	1.02013	1.07462	1.05561	1.0843	1.22983	1.04674	1.07483	1.04746
8.96136e-34	1.00278	0.501	0.245	3.01962e-29	cTEC	Arl2	28.52	0.924386	0.807903	0.30102	0.583474	0.228116	0.613839	0.279744	0.160423	0.0941704	0.643192	1	0.457143	0.110266	2.2193	0.597015	0.26087	1.34071	1.39212	1.21364	1.28376	1.18953	1.13971	1.07889	1.08722	1.08885	1.3256	1.33109	1.19158	1.08716	1.49599	1.33144	1.33326
1.53633e-33	1.12559	0.522	0.27	5.17681e-29	cTEC	Fbxo6	28.2859	0.969754	0.56202	0.538265	0.517707	0.132017	0.566964	0.679744	0.5057	0.309417	0.549296	0.627119	0.203571	0.129278	0.315789	0.253731	0.217391	1.35907	1.29066	1.32955	1.26504	1.10771	1.13556	1.18642	1.24206	1.23881	1.23457	1.22372	1.11764	1.09256	1.08388	1.14781	1.33301
2.78105e-33	1.50868	0.344	0.132	9.37102e-29	cTEC	Ryr3	28.0282	1.43478	0.526894	0.502551	0.347386	0.530447	0.178571	0.653305	0.259772	0.0762332	0.234742	0.118644	0.0714286	0.0418251	0.0263158	0.0447761	0	1.70422	1.30844	1.37397	1.22771	1.45957	1.05575	1.215	1.15341	1.05848	1.15016	1.0444	1.05547	1.0378	1.00659	1.0194	1
6.23049e-33	1.47106	0.357	0.142	2.09943e-28	cTEC	Mmut	27.6779	0.574669	0.387486	0.142857	0.254637	0.0808754	0.31808	0.232409	0.11645	0.0672646	0.244131	0.322034	0.135714	0.0608365	0.745614	0.432836	0	1.23609	1.19959	1.10258	1.12872	1.07772	1.07005	1.07289	1.06813	1.07782	1.1074	1.10683	1.06451	1.05613	1.18737	1.22051	1
1.67341e-32	1.5042	0.278	0.091	5.63873e-28	cTEC	Slc2a9	27.2488	0.431002	0.347969	0.0459184	0.185497	0.0930067	0.0915179	0.133475	0.13355	0.0941704	0.13615	0.0169492	0	0.0494297	0	0.0149254	0.0434783	1.22672	1.19765	1.03335	1.09415	1.10385	1.029	1.05149	1.08726	1.1053	1.06637	1.00561	1	1.03371	1	1.01311	1.08296
2.10967e-32	1.1766	0.265	0.087	7.10875e-28	cTEC	Nlrp1b	27.1482	0.491493	0.200878	0.00765306	0.0404722	0.186489	0.111607	0.0788913	0.203583	0.107623	0.0516432	0.0169492	0.0142857	0.0684411	0.0175439	0.0298507	0	1.29233	1.11441	1.0058	1.01989	1.26285	1.03917	1.03733	1.15556	1.08981	1.02202	1.00371	1.01022	1.03466	1.00402	1.01141	1
2.18811e-32	1.00185	0.335	0.13	7.37306e-28	cTEC	Pcgf2	27.1324	0.466919	0.287596	0.219388	0.150084	0.161989	0.19308	0.140299	0.0830619	0.044843	0.239437	0.20339	0.139286	0.00380228	0.166667	0.19403	0	1.22051	1.16222	1.16766	1.08207	1.1751	1.06409	1.05118	1.06843	1.06591	1.12388	1.0667	1.08829	1.00632	1.04204	1.11596	1
2.38941e-32	1.01159	0.573	0.326	8.05136e-28	cTEC	Asah1	27.0941	1.33081	1.25906	0.553571	1.15177	0.205281	0.879464	0.824733	0.284202	0.29148	0.704225	1.32203	0.657143	0.315589	1.02632	1.52239	0.26087	1.45956	1.57232	1.27804	1.49641	1.16759	1.20236	1.22076	1.13011	1.22164	1.29627	1.39182	1.32732	1.15676	1.26164	1.69224	1.35029
2.43288e-32	1.20248	0.416	0.184	8.19782e-28	cTEC	Dynlt1c	27.0863	0.724008	0.35236	0.290816	0.495784	0.109657	0.402902	0.269936	0.125407	0.0896861	1.19718	1.13559	0.625	0.1673	0.596491	0.358209	0.0434783	1.25422	1.1719	1.16656	1.22948	1.09802	1.09449	1.07343	1.05908	1.05686	1.49308	1.30304	1.20422	1.11924	1.15296	1.18054	1.08296
2.52495e-32	1.10374	0.393	0.167	8.50808e-28	cTEC	2310010J17Rik	27.0702	0.637051	0.484083	0.25	0.431703	0.121551	0.22433	0.220043	0.149837	0.0224215	0.28169	0.491525	0.492857	0.0798479	0.903509	0.268657	0.173913	1.25312	1.25196	1.17806	1.21929	1.12122	1.06346	1.06987	1.08629	1.01709	1.12775	1.15965	1.3042	1.06	1.22554	1.12932	1.19948
3.52039e-32	1.20227	0.399	0.171	1.18623e-27	cTEC	Bloc1s6	26.9258	0.601134	0.313941	0.168367	0.246206	0.114653	0.377232	0.267377	0.218241	0.139013	0.220657	0.423729	0.25	0.144487	0.27193	0.283582	0.0869565	1.2279	1.16301	1.10468	1.12544	1.10245	1.09183	1.07658	1.11386	1.09087	1.10326	1.12867	1.10003	1.11913	1.06626	1.13963	1.15975
3.60878e-32	1.05025	0.51	0.264	1.21601e-27	cTEC	Snn	26.9151	1.08507	0.221734	0.0561224	0.180438	0.140105	1.36272	0.937313	0.912052	0.237668	0.159624	0.169492	0.289286	0.129278	0.105263	0.0895522	0.130435	1.38333	1.11506	1.0372	1.08756	1.14217	1.29376	1.27323	1.40932	1.12067	1.08226	1.0519	1.14511	1.09631	1.02493	1.02881	1.17346
7.39725e-32	1.00763	0.255	0.087	2.49258e-27	cTEC	Adamts19	26.6034	0.657845	1.03952	0.0790816	0.322091	0.239534	0.09375	0.034968	0.0105863	0	0.0140845	0.0338983	0.192857	0.0456274	0.00877193	0.0895522	0	1.31406	1.55854	1.07146	1.13617	1.26697	1.03908	1.01371	1.0095	1	1.00755	1.00611	1.04158	1.02082	1.00143	1.02609	1
1.59234e-31	1.06078	0.488	0.244	5.36555e-27	cTEC	Gm5617	26.2704	0.901701	0.448957	0.247449	0.514334	0.133682	0.375	0.720682	0.32329	0.363229	0.591549	0.559322	0.578571	0.18251	0.947368	0.298507	0.0869565	1.34075	1.24749	1.15447	1.24223	1.11814	1.10228	1.21022	1.19444	1.29855	1.24592	1.15939	1.31309	1.11939	1.24572	1.15822	1.18825
2.03468e-31	1.0788	0.509	0.266	6.85605e-27	cTEC	Faap20	26.1639	0.952741	0.631175	0.387755	0.676223	0.179591	0.583705	0.50064	0.401466	0.156951	0.507042	0.898305	0.45	0.1673	0.719298	0.567164	0.130435	1.36527	1.32491	1.25369	1.3225	1.15428	1.13744	1.14194	1.20963	1.10408	1.21837	1.26597	1.20296	1.10815	1.17193	1.36241	1.20794
5.73413e-31	1.04402	0.444	0.209	1.93217e-26	cTEC	Bloc1s4	25.714	0.671078	0.416026	0.206633	0.500843	0.104186	0.489955	0.381237	0.263844	0.152466	0.164319	0.627119	0.132143	0.346008	0.421053	0.253731	0.130435	1.2452	1.21402	1.14426	1.2415	1.08669	1.11105	1.10906	1.12785	1.13237	1.07213	1.21144	1.07766	1.30853	1.11404	1.14756	1.26538
1.21585e-30	1.00786	0.369	0.155	4.09694e-26	cTEC	Prss36	25.3875	0.504726	0.312843	0.15051	0.731872	0.0870599	0.282366	0.353518	0.109121	0.044843	0.201878	0.101695	0.214286	0.026616	0.289474	0.0447761	0.0434783	1.19817	1.15957	1.10253	1.31169	1.08742	1.06866	1.10542	1.06044	1.05907	1.10652	1.0365	1.0781	1.01213	1.09479	1.01824	1.08049
1.33542e-30	1.11843	0.459	0.226	4.49983e-26	cTEC	Cpox	25.3468	0.886578	0.623491	0.234694	0.350759	0.160799	0.852679	0.484861	0.232899	0.0179372	0.399061	0.491525	0.414286	0.174905	0.578947	0.38806	0.0434783	1.31526	1.29744	1.13798	1.17187	1.13806	1.18292	1.13901	1.10713	1.01977	1.1794	1.16895	1.20624	1.15538	1.16062	1.18605	1.06014
1.92645e-30	1.23239	0.444	0.226	6.49136e-26	cTEC	Cisd3	25.1877	0.754253	0.193194	0.229592	0.325464	0.0794481	0.691964	0.793177	0.341205	0.0896861	0.450704	0.288136	0.392857	0.0532319	0.429825	0.298507	0.0434783	1.2943	1.11129	1.15548	1.17122	1.06672	1.16829	1.21488	1.15906	1.08032	1.21152	1.09554	1.20532	1.03932	1.11741	1.17447	1.06014
2.85357e-30	1.03411	0.493	0.256	9.6154e-26	cTEC	Snapc1	25.017	1.01512	0.510428	0.257653	0.404722	0.227402	0.6875	0.460554	0.259772	0.152466	0.431925	0.576271	0.364286	0.228137	0.649123	0.268657	0.0869565	1.36159	1.26934	1.17818	1.20155	1.21557	1.15633	1.1393	1.15178	1.13087	1.22995	1.18749	1.18111	1.19588	1.16607	1.17183	1.12594
2.97103e-30	1.01838	0.384	0.167	1.00112e-25	cTEC	Rtl8b	24.9995	0.614367	0.406147	0.0841837	0.359191	0.159134	0.222098	0.250746	0.162866	0.0538117	0.422535	0.305085	0.360714	0.18251	0.526316	0.492537	0.73913	1.23012	1.20212	1.06975	1.17556	1.12898	1.05557	1.07718	1.08049	1.05498	1.18804	1.09508	1.17695	1.14847	1.1287	1.32523	1.81792
3.23311e-30	1.00122	0.554	0.322	1.08943e-25	cTEC	Snapin	24.9628	1.16824	0.727772	0.34949	0.708263	0.215747	0.882812	0.968443	0.359935	0.143498	0.356808	0.542373	0.385714	0.106464	0.912281	0.701493	0.0869565	1.40517	1.36389	1.22524	1.3351	1.17786	1.20068	1.25425	1.17535	1.1062	1.16345	1.18827	1.17253	1.07753	1.21959	1.34506	1.11745
3.67236e-30	1.62	0.325	0.134	1.23744e-25	cTEC	1500009L16Rik	24.9075	0.680529	0.141603	0.0127551	0.0860034	0.134872	1.35268	0.270362	0.012215	0	0.262911	0.0508475	0.503571	0.34981	0.140351	0.522388	0	1.28065	1.07498	1.00607	1.06567	1.10318	1.27567	1.07079	1.00532	1	1.13022	1.03751	1.21469	1.22273	1.03743	1.27573	1
4.96075e-30	1.07637	0.429	0.201	1.67157e-25	cTEC	Dusp12	24.7769	0.688091	0.358946	0.229592	0.564924	0.161275	0.565848	0.243923	0.130293	0.0941704	0.140845	0.389831	0.164286	0.186312	0.614035	0.41791	0.0434783	1.2723	1.18452	1.17344	1.2686	1.16234	1.12773	1.07384	1.07242	1.08248	1.06652	1.14502	1.08369	1.15867	1.16507	1.2118	1.08811
5.07452e-30	1.00736	0.389	0.17	1.70991e-25	cTEC	Apba2	24.767	1.10775	0.0954995	0.0331633	0.0910624	0.0209324	0.473214	1.70448	0.920195	0.152466	0.2723	0.101695	0.110714	0.0114068	1.01754	0.0447761	0	1.39263	1.05213	1.03578	1.03959	1.02993	1.11304	1.50632	1.52832	1.1494	1.12028	1.05557	1.07064	1.01427	1.32614	1.04396	1
5.16177e-30	1.17852	0.412	0.187	1.73931e-25	cTEC	Trpc1	24.7596	0.905482	0.326015	0.0637755	0.29511	0.231684	0.622768	0.449893	0.29886	0.0403587	0.741784	0.20339	0.332143	0.0532319	0.219298	0.268657	0	1.40756	1.19845	1.07408	1.16759	1.24695	1.16834	1.16	1.18099	1.03927	1.40786	1.06144	1.22918	1.02882	1.069	1.15232	1
7.35575e-30	1.35771	0.323	0.124	2.47859e-25	cTEC	Bcs1l	24.6058	0.446125	0.20966	0.135204	0.185497	0.0858706	0.339286	0.241791	0.0708469	0.0224215	0.107981	0.220339	0.0928571	0.0494297	0.210526	0.119403	0.0434783	1.18906	1.11193	1.10293	1.09511	1.08286	1.08911	1.07509	1.04604	1.0135	1.04821	1.07551	1.04404	1.03215	1.0538	1.07056	1.04746
9.20467e-30	1.14995	0.329	0.129	3.10161e-25	cTEC	Snapc2	24.5084	0.444234	0.232711	0.102041	0.22597	0.0911037	0.398438	0.170576	0.10342	0.0269058	0.169014	0.305085	0.139286	0.0646388	0.254386	0.119403	0.0869565	1.16751	1.135	1.08389	1.12492	1.08372	1.09039	1.04797	1.05076	1.01563	1.08635	1.08879	1.07851	1.06938	1.07029	1.09086	1.17714
1.02019e-29	1.04515	0.527	0.295	3.43763e-25	cTEC	Sc5d	24.4637	1.41588	1.1438	0.382653	0.600337	0.25	0.733259	0.613646	0.493485	0.246637	0.446009	0.966102	0.5	0.258555	0.517544	0.253731	0.130435	1.45639	1.52564	1.26442	1.28522	1.21423	1.15985	1.18003	1.2678	1.16535	1.22036	1.28849	1.24108	1.20836	1.13184	1.10719	1.14668
1.09687e-29	1.15665	0.287	0.105	3.69602e-25	cTEC	Hotairm1	24.4323	0.62949	0.467618	0.44898	0.178752	0.163892	0.113839	0.0307036	0.0130293	0.0134529	0.0234742	0.186441	0.325	0.0190114	0.982456	0.268657	0.304348	1.22949	1.24196	1.34505	1.08281	1.15727	1.02745	1.01124	1.00922	1.01719	1.01223	1.05086	1.15361	1.0186	1.25919	1.20743	1.46628
1.45293e-29	1.03829	0.537	0.293	4.8958e-25	cTEC	Rab11fip4	24.3102	1.33459	0.148189	0.290816	0.0674536	0.341104	2.34152	0.860554	0.342834	0.0986547	0.99061	0.254237	1.25	0.152091	0.0438596	0	0	1.59255	1.08034	1.20161	1.0311	1.39427	1.56394	1.29619	1.21307	1.08903	1.4636	1.08034	1.7556	1.15799	1.01056	1	1
2.49996e-29	1.3901	0.359	0.153	8.42388e-25	cTEC	Raver2	24.0745	0.612476	0.139407	0.0255102	0.0640809	0.151284	0.766741	0.313859	0.220684	0.0134529	0.028169	0.169492	0.717857	0.0418251	0.114035	0.0298507	0	1.33491	1.07552	1.01934	1.03532	1.17368	1.22325	1.11779	1.12869	1.0094	1.02423	1.04053	1.40756	1.04246	1.04665	1.0153	1
3.48766e-29	1.21086	0.369	0.159	1.1752e-24	cTEC	Atpaf2	23.9299	0.648393	0.274424	0.0892857	0.202361	0.158658	0.651786	0.26226	0.178339	0.044843	0.117371	0.237288	0.0892857	0.102662	0.333333	0.104478	0.0434783	1.24982	1.15412	1.06672	1.09874	1.13695	1.15437	1.08567	1.10391	1.02027	1.05528	1.05881	1.05288	1.07486	1.11136	1.0497	1.05205
4.76276e-29	1.34518	0.268	0.092	1.60486e-24	cTEC	Irgq	23.7946	0.36673	0.154775	0.102041	0.190556	0.0834919	0.117188	0.0759062	0.0903909	0.0224215	0.328638	0.186441	0.296429	0.0836502	0.157895	0.134328	0	1.17467	1.08329	1.06701	1.09776	1.0952	1.03616	1.02563	1.05811	1.01018	1.16608	1.05731	1.16452	1.07948	1.04045	1.08224	1
1.23103e-28	1.45165	0.319	0.125	4.14807e-24	cTEC	Unc13b	23.3822	0.862004	0.403952	0.721939	0.738617	0.0613701	0.238839	0.217484	0.245928	0.103139	1.41784	1.9322	0.378571	0.0114068	0.561404	0.0746269	0.0434783	1.36409	1.22622	1.4444	1.35726	1.07394	1.06708	1.0915	1.15143	1.11231	1.62866	1.56088	1.18973	1.01571	1.22686	1.03913	1.08843
1.55265e-28	1.08529	0.44	0.216	5.23179e-24	cTEC	Nudt19	23.2813	0.78828	0.48079	0.173469	0.296796	0.113939	0.933036	0.558635	0.39658	0.0986547	0.234742	0.644068	0.15	0.269962	0.342105	0.41791	0.173913	1.28573	1.23793	1.10458	1.15779	1.09002	1.19911	1.16069	1.19409	1.04287	1.11442	1.22044	1.07171	1.17497	1.11047	1.20809	1.25924
1.67694e-28	1.1227	0.259	0.091	5.65061e-24	cTEC	Akap17b	23.2479	0.349716	0.237102	0.135204	0.148398	0.0727878	0.0915179	0.137313	0.0920195	0	0.859155	0.898305	0.160714	0.0874525	0.377193	0.149254	0.130435	1.16502	1.13803	1.10031	1.08153	1.08105	1.02365	1.04668	1.0486	1	1.42179	1.25464	1.08628	1.07281	1.10608	1.08722	1.19687
2.47643e-28	1.04529	0.488	0.255	8.34458e-24	cTEC	Socs3	23.0786	2.36484	1.70692	0.681122	3.2597	0.467888	0.448661	0.41791	0.394951	0.569507	1.17371	3.61017	0.592857	0.452471	2.76316	1.0597	1.52174	1.7712	1.71868	1.5427	2.34232	1.41934	1.12982	1.13021	1.21559	1.50132	1.43455	1.85849	1.29239	1.24476	1.59866	1.55715	2.26633
6.59368e-28	1.2712	0.325	0.131	2.22181e-23	cTEC	Cfap410	22.6533	0.517958	0.249177	0.112245	0.48398	0.0775452	0.257812	0.212793	0.0651466	0.00896861	0.694836	0.20339	0.107143	0.0456274	0.675439	0.19403	0	1.18824	1.12797	1.07031	1.22721	1.06986	1.06439	1.06321	1.03708	1.00173	1.31343	1.0589	1.04976	1.0412	1.18305	1.14605	1
1.30651e-27	1.02639	0.272	0.1	4.40242e-23	cTEC	Il34	22.3563	0.650284	0.548847	0.0714286	0.494098	0.0692198	0.758929	0.471215	0.179967	0.0224215	0.122066	0.101695	0.0857143	0.121673	0.131579	4.68657	0	1.27453	1.27428	1.04441	1.23533	1.08225	1.19627	1.16687	1.09445	1.03031	1.06039	1.04913	1.03525	1.145	1.05539	2.39597	1
1.75805e-27	1.1818	0.369	0.163	5.92393e-23	cTEC	Fam120aos	22.2274	0.678639	0.485181	0.15051	0.453626	0.103949	0.233259	0.216631	0.15228	0.0941704	0.577465	0.542373	0.339286	0.0456274	0.491228	0.149254	0	1.2431	1.26207	1.10659	1.21265	1.09994	1.05562	1.06659	1.0948	1.07869	1.298	1.18451	1.14358	1.03291	1.14887	1.12639	1
2.9207e-27	1.15137	0.365	0.161	9.84159e-23	cTEC	Adora2a	22.0069	0.574669	0.150384	0.0127551	0.0522766	0.151522	0.4375	0.372708	0.364007	0.179372	0.206573	0.40678	0.0428571	0.140684	0.0175439	0.164179	0.130435	1.27046	1.07709	1.0055	1.02422	1.15203	1.1164	1.11503	1.21602	1.2284	1.12202	1.13527	1.03425	1.13736	1.00289	1.08598	1.21575
5.98601e-27	1.09312	0.414	0.201	2.01705e-22	cTEC	Bag5	21.6953	0.712665	0.551043	0.219388	0.524452	0.1451	0.614955	0.264819	0.12785	0.0672646	0.239437	0.542373	0.228571	0.21673	0.473684	0.477612	0.608696	1.25745	1.27311	1.13877	1.25153	1.11388	1.13857	1.07331	1.05993	1.05386	1.1097	1.16531	1.07537	1.22911	1.12899	1.2752	1.78096
1.65069e-26	1.01397	0.446	0.227	5.56216e-22	cTEC	2010320M18Rik	21.2548	0.705104	0.431394	0.229592	0.41484	0.158183	0.600446	0.49467	0.186482	0.0807175	0.375587	0.508475	0.342857	0.0722433	0.710526	0.164179	0.0434783	1.27682	1.23384	1.16384	1.20435	1.13299	1.14251	1.14409	1.10546	1.07726	1.17683	1.16046	1.14112	1.05722	1.18037	1.06381	1.08843
1.71202e-26	1.11332	0.261	0.094	5.76883e-22	cTEC	Dcbld2	21.2389	0.436673	0.310648	0.102041	0.145025	0.0592293	0.205357	0.339446	0.135993	0.0044843	0.150235	0.355932	0.0607143	0	0.201754	0.761194	0.0869565	1.17114	1.15992	1.06036	1.0739	1.06729	1.07155	1.10686	1.06789	1.00544	1.07806	1.08849	1.04772	1	1.06487	1.35228	1.13155
1.80213e-26	1.03507	0.399	0.189	6.07247e-22	cTEC	Slc25a1	21.2166	0.591682	0.387486	0.214286	0.354132	0.124643	0.385045	0.292537	0.234528	0.174888	0.586854	0.440678	0.328571	0.0646388	0.517544	0.313433	0.217391	1.2488	1.1998	1.14815	1.17256	1.11979	1.09118	1.08794	1.12968	1.19451	1.27951	1.16164	1.1606	1.03401	1.13362	1.20669	1.33717
2.43776e-26	1.09588	0.251	0.091	8.21427e-22	cTEC	Triqk	21.0854	0.351607	0.351262	0.186224	0.114671	0.106803	0.0970982	0.0639659	0.031759	0.0044843	0.150235	0.271186	0.0785714	0.00380228	0.578947	0.149254	0	1.1491	1.19535	1.12839	1.0655	1.10068	1.02647	1.01889	1.02038	1.00107	1.07711	1.09393	1.02708	1.00911	1.17461	1.08276	1
3.69044e-26	1.15344	0.268	0.1	1.24353e-21	cTEC	Bbs5	20.9053	0.31758	0.186608	0.109694	0.141653	0.0875357	0.229911	0.150107	0.0570033	0.0179372	0.126761	0.20339	0.0821429	0.0152091	0.385965	0.0597015	0.0434783	1.14879	1.09772	1.0807	1.07403	1.09028	1.0655	1.04655	1.04501	1.02271	1.04789	1.07829	1.04112	1.01309	1.10444	1.0289	1.02566
6.45539e-26	1.08937	0.274	0.104	2.17521e-21	cTEC	Slc2a13	20.6625	0.73913	0.498353	0.0204082	0.107926	0.163416	0.0357143	0.429424	0.34772	0.00896861	0.276995	0.0508475	0.267857	0.0836502	0.0175439	0.358209	0.130435	1.33103	1.26672	1.0246	1.07209	1.18596	1.00938	1.18787	1.22351	1.01216	1.16177	1.02223	1.22903	1.05707	1.01673	1.16739	1.10115
9.62322e-26	1.07868	0.342	0.149	3.24264e-21	cTEC	Kctd6	20.4891	0.519849	0.349067	0.102041	0.458685	0.0949096	0.393973	0.213646	0.125407	0.0852018	0.107981	0.627119	0.153571	0.0456274	0.201754	0.149254	0.173913	1.19668	1.18158	1.06591	1.22224	1.09181	1.09829	1.06803	1.07261	1.06609	1.05186	1.21473	1.08249	1.04371	1.06909	1.07841	1.26422
1.06767e-25	1.08254	0.365	0.166	3.59763e-21	cTEC	Rab42	20.444	0.517958	0.0768386	0.0535714	0.0758853	0.112988	0.608259	0.5258	0.201954	0.215247	0.0751174	0.101695	0.0285714	0.00760456	0.614035	0.0447761	0	1.22483	1.0415	1.04084	1.04647	1.12136	1.15097	1.15172	1.11102	1.22477	1.03588	1.034	1.02059	1.00189	1.15014	1.016	1
1.26105e-25	1.02472	0.467	0.255	4.24923e-21	cTEC	Dhrs1	20.3717	0.860113	0.716795	0.219388	0.612142	0.15628	0.731027	0.547548	0.216612	0.0896861	0.239437	0.728814	0.485714	0.190114	0.605263	0.41791	0.173913	1.31297	1.34739	1.15204	1.27044	1.13437	1.16151	1.15137	1.10587	1.06267	1.11961	1.23235	1.18093	1.11298	1.14791	1.26985	1.25989
4.0296e-25	1.30423	0.302	0.123	1.35781e-20	cTEC	Gk5	19.8672	0.979206	0.290889	0.237245	0.500843	0.132969	0.393973	0.460981	0.238599	0.0627803	0.539906	0.169492	0.196429	0.288973	0.0438596	0.701493	0.0434783	1.39613	1.16582	1.23013	1.24774	1.18149	1.10145	1.16688	1.15049	1.04869	1.31299	1.0627	1.12433	1.33498	1.00894	1.31861	1.05205
5.80773e-25	1.17457	0.359	0.165	1.95697e-20	cTEC	Ado	19.7084	0.510397	0.172338	0.0918367	0.229342	0.101094	0.635045	0.307463	0.142508	0.058296	0.225352	0.271186	0.221429	0.114068	0.359649	0.358209	0.130435	1.20019	1.09612	1.06266	1.11787	1.08548	1.14631	1.08625	1.07289	1.03627	1.10399	1.08948	1.12195	1.12129	1.09572	1.18659	1.12618
1.75437e-24	1.25749	0.352	0.162	5.91153e-20	cTEC	Lypd6b	19.2283	0.621928	0.12843	0.566327	0.0337268	0.0566127	1.08371	0.672921	0.207655	0.0717489	0.0892019	0.20339	0.0642857	0.136882	0.482456	0	0	1.2939	1.06904	1.37484	1.02333	1.06265	1.26485	1.22982	1.131	1.03796	1.03877	1.05901	1.01732	1.17015	1.12689	1	1
2.10827e-24	1.0328	0.48	0.264	7.10404e-20	cTEC	D130040H23Rik	19.1485	1.12854	0.229418	0.0714286	0.107926	0.156518	1.89844	1.57996	0.808632	0.188341	0.431925	0.0847458	0.335714	0.110266	0.140351	0.104478	0.0434783	1.54012	1.12596	1.05251	1.05361	1.17418	1.45177	1.521	1.47637	1.17142	1.21257	1.03838	1.22992	1.08233	1.05155	1.09533	1.04746
3.99325e-24	1.0626	0.425	0.218	1.34556e-19	cTEC	Thsd4	18.8711	1.47826	0.377607	1.19388	1.04216	0.543054	0.402902	0.627719	0.563518	0.0762332	1.48826	0.220339	0.142857	0.0228137	0.535088	0.104478	0	1.73653	1.25126	1.8081	1.56154	1.56183	1.15281	1.2285	1.35199	1.089	1.6213	1.08363	1.09848	1.01939	1.22178	1.07911	1
8.68709e-23	1.11255	0.251	0.098	2.9272e-18	cTEC	Mir22hg	17.5335	0.379962	0.186608	0.158163	0.111298	0.0635109	0.0279018	0.131343	0.270358	0.125561	0.225352	0.355932	0.207143	0.0722433	0.201754	0.179104	0.173913	1.16146	1.10164	1.11692	1.05885	1.06665	1.00928	1.05374	1.16254	1.09603	1.11192	1.13698	1.11723	1.07109	1.04784	1.08489	1.22653
1.07292e-22	1.4573	0.297	0.131	3.61532e-18	cTEC	Mbnl3	17.4419	0.551985	0.172338	0.221939	0.0505902	0.0604186	0.547991	0.527079	0.139251	0.0672646	0.239437	0.169492	0.428571	0.330798	0.114035	0	0	1.28052	1.10513	1.15343	1.02623	1.0679	1.14125	1.17788	1.08594	1.061	1.09654	1.05518	1.23649	1.23376	1.02972	1	1
1.18791e-22	1.08772	0.302	0.131	4.00277e-18	cTEC	Gpr27	17.3976	0.446125	0.340285	0.122449	0.480607	0.150809	0.316964	0.162047	0.014658	0	0.112676	0	0.139286	0.00380228	0.464912	0.164179	0	1.19216	1.18375	1.07944	1.26386	1.12161	1.07501	1.04582	1.00528	1	1.06344	1	1.03973	1.00148	1.1193	1.13056	1
3.2087e-22	1.16607	0.28	0.116	1.08121e-17	cTEC	Amacr	16.9661	0.372401	0.297475	0.132653	0.210793	0.0720742	0.209821	0.255864	0.0716612	0.058296	0.0892019	0.20339	0.125	0.0114068	0.166667	0.298507	0.217391	1.1462	1.15956	1.08765	1.102	1.05357	1.0472	1.06992	1.03783	1.06491	1.06598	1.07085	1.05289	1.00907	1.0641	1.16659	1.26635
5.19328e-22	1.17898	0.278	0.115	1.74993e-17	cTEC	Lpin1	16.757	0.491493	0.120746	0.117347	0.124789	0.142245	0.196429	0.165458	0.131922	0.0627803	0.370892	0.186441	0.207143	0.209125	0.122807	0.19403	0	1.2594	1.0678	1.07836	1.06713	1.19789	1.05488	1.0567	1.10007	1.02589	1.1862	1.05854	1.1195	1.17229	1.0365	1.13806	1
2.08405e-20	1.07064	0.312	0.144	7.02243e-16	cTEC	Adi1	15.1535	0.453686	0.277717	0.181122	0.18887	0.0908658	0.491071	0.249893	0.121336	0.0627803	0.347418	0.322034	0.225	0.0570342	0.482456	0.149254	0.0434783	1.18201	1.1494	1.1194	1.08414	1.08386	1.1239	1.06982	1.06571	1.04085	1.17763	1.10918	1.1128	1.0578	1.12376	1.05535	1.08258
5.26706e-20	1.01011	0.352	0.176	1.77479e-15	cTEC	Asb7	14.7509	0.599244	0.311745	0.209184	0.187184	0.134634	0.532366	0.397441	0.159609	0.0538117	0.328638	0.237288	0.128571	0.125475	0.219298	0.223881	0	1.26002	1.16931	1.15269	1.0956	1.14746	1.13491	1.14279	1.1097	1.04875	1.15977	1.0741	1.07532	1.11236	1.06345	1.14244	1
8.74335e-20	1.16362	0.274	0.119	2.94616e-15	cTEC	Ccdc8	14.5307	0.381853	0.18551	0.0433673	0.141653	0.107992	0.511161	0.187633	0.0236156	0.00896861	0.230047	0.355932	0.242857	0.00380228	0.192982	0.328358	0	1.15995	1.09494	1.03268	1.08307	1.09813	1.12605	1.05131	1.00883	1.00876	1.10453	1.11018	1.06066	1.00148	1.04624	1.16982	1
1.23822e-19	1.20986	0.284	0.127	4.17232e-15	cTEC	Sipa1l2	14.3796	0.497164	0.106476	0.130102	0.150084	0.0482873	0.314732	0.34371	0.221498	0.0717489	0.370892	0.559322	0.185714	0.155894	0.105263	0.477612	0.217391	1.22918	1.06106	1.0884	1.09008	1.0694	1.09685	1.13531	1.16262	1.054	1.18085	1.1777	1.09801	1.19666	1.03452	1.45478	1.24343
5.27799e-18	1.1612	0.331	0.18	1.77847e-13	cTEC	Nudt16	12.75	0.638941	0.664105	0.0637755	0.428331	0.0768316	0.425223	0.463539	0.151466	0.0762332	0.333333	0.220339	0.167857	0.144487	0.22807	0.134328	0	1.24076	1.31791	1.04374	1.20254	1.06742	1.10966	1.1259	1.07131	1.07124	1.17393	1.08043	1.07562	1.12883	1.05364	1.07837	1
6.81878e-18	1.06634	0.316	0.158	2.29766e-13	cTEC	Grhpr	12.6387	0.47448	0.305159	0.122449	0.317032	0.0808754	0.66183	0.278465	0.101792	0.0179372	0.276995	0.372881	0.225	0.110266	0.850877	0.223881	0.0869565	1.17352	1.15681	1.07963	1.15065	1.06429	1.14591	1.07309	1.0433	1.00496	1.15675	1.14923	1.07379	1.08113	1.20226	1.13928	1.11226
2.50352e-17	1.0439	0.28	0.132	8.43586e-13	cTEC	Ntpcr	12.0739	0.378072	0.276619	0.145408	0.29511	0.119886	0.404018	0.173134	0.0570033	0.0179372	0.126761	0.355932	0.1	0.13308	0.780702	0.179104	0	1.16595	1.16174	1.098	1.14425	1.09332	1.09927	1.04686	1.02749	1.01544	1.05449	1.12587	1.03216	1.08802	1.1939	1.08913	1
8.80167e-17	1.06515	0.333	0.176	2.96581e-12	cTEC	Dbt	11.5279	0.516068	0.414929	0.130102	0.246206	0.090628	0.56808	0.393177	0.142508	0.0538117	0.230047	0.237288	0.217857	0.1673	0.736842	0.208955	0	1.21626	1.22095	1.08699	1.1208	1.08518	1.13013	1.11432	1.06691	1.02117	1.14046	1.07544	1.08609	1.16172	1.20784	1.09394	1
1.21328e-16	1.00558	0.331	0.175	4.08828e-12	cTEC	Cbr4	11.3885	0.451796	0.255763	0.186224	0.236088	0.0915794	0.492188	0.43113	0.166938	0.058296	0.211268	0.677966	0.135714	0.0532319	0.184211	0.0895522	0	1.18827	1.14304	1.13214	1.11412	1.08441	1.11245	1.11706	1.07577	1.03001	1.09566	1.20324	1.05059	1.04162	1.04759	1.07577	1
1.27971e-16	1.05423	0.257	0.118	4.31212e-12	cTEC	0610009L18Rik	11.3653	0.385633	0.33809	0.0841837	0.217538	0.0908658	0.136161	0.223028	0.0789902	0.107623	0.173709	0.220339	0.210714	0.0228137	0.324561	0.119403	0.0434783	1.16702	1.18263	1.06146	1.1159	1.08449	1.03759	1.07118	1.04944	1.12381	1.09778	1.07209	1.11662	1.01366	1.07825	1.07016	1.06095
3.0722e-16	1.01854	0.261	0.122	1.03521e-11	cTEC	Cep126	10.985	0.402647	0.154775	0.0382653	0.0708263	0.0908658	0.387277	0.428145	0.123779	0.0044843	0.375587	0.0677966	0.0607143	0.0152091	0.622807	0.0447761	0	1.18955	1.09135	1.0332	1.03719	1.10155	1.10426	1.1447	1.06924	1.00551	1.1791	1.01988	1.04319	1.0134	1.18643	1.02949	1
6.3721e-13	1.06866	0.268	0.148	2.14714e-08	cTEC	Gm14305	7.66814	0.398866	0.301866	0.0612245	0.261383	0.0696955	0.487723	0.307036	0.111564	0.044843	0.117371	0.186441	0.225	0.0798479	0.394737	0.164179	0.130435	1.15045	1.14541	1.04005	1.1314	1.04962	1.10724	1.08227	1.05135	1.02661	1.06044	1.06258	1.08187	1.07714	1.10105	1.05965	1.20129
1.21538e-11	1.0575	0.297	0.172	4.09534e-07	cTEC	6030407O03Rik	6.38771	2.35917	0.277717	0.0153061	0.0640809	1.89034	0.131696	0.0925373	0.0325733	0	0.0234742	0	0.207143	0.0228137	0.0789474	0.0149254	0	2.07525	1.13905	1.0142	1.03616	2.28388	1.04155	1.04037	1.03041	1	1.01374	1	1.06658	1.03794	1.02416	1.01506	1
9.14656e-07	-5.2906	0.561	0.487	0.0308202	cTEC	Pth	-1.51116	0.916824	0.769484	0.630102	0.893761	0.6049	1.51339	4.87633	0.963355	0.434978	1.23944	1.11864	0.703571	0.490494	8063.78	1.0597	0.434783	1.4673	1.46612	1.46276	1.47043	1.72018	1.3785	1.90535	1.65667	1.41527	1.55821	1.36503	1.41621	1.45255	11.5464	1.59794	1.59318
8.36426e-07	-1.00876	0.198	0.259	0.0281842	cTEC	Rangap1	-1.54999	0.241966	0.165752	0.221939	0.271501	0.139867	1.92076	0.685288	0.468241	0.161435	0.58216	0.559322	1.04286	0.406844	0.359649	0.268657	0.0869565	1.10518	1.09015	1.18374	1.12573	1.15032	1.43245	1.22223	1.25313	1.121	1.26838	1.19882	1.43065	1.3142	1.12312	1.13659	1.14643
6.56896e-07	-1.03363	0.195	0.269	0.0221348	cTEC	Plekhm2	-1.65492	0.243856	0.203074	0.339286	0.222597	0.211703	0.511161	0.680171	0.706026	0.587444	0.600939	0.355932	0.682143	0.296578	0.298246	0.373134	0.0869565	1.13152	1.12587	1.25194	1.12615	1.26621	1.14284	1.24937	1.40539	1.52793	1.35034	1.12424	1.44239	1.23085	1.10728	1.24094	1.15229
5.10594e-07	-1.06951	0.24	0.337	0.017205	cTEC	Ly6d	-1.76435	2.62193	0.969265	7.31122	2.01855	1.16365	6.33259	8.46994	14.4072	4.87444	0.15493	1.38983	1.13571	5.55513	0.0438596	0.208955	0	1.80795	1.53385	3.12348	1.76848	1.86913	2.06761	2.47461	3.65038	2.41458	1.08595	1.55278	1.42062	3.10372	1.0106	1.09972	1
3.14068e-07	-1.09501	0.225	0.284	0.0105828	cTEC	Hdac8	-1.9754	0.376181	0.650933	0.780612	0.418212	0.392959	0.764509	0.439232	0.390065	0.210762	1.02817	1	2.38571	0.768061	1.24561	1.16418	0.217391	1.1828	1.35542	1.53821	1.23176	1.45485	1.19749	1.15512	1.23092	1.21972	1.46721	1.34025	2.18068	1.69513	1.38299	1.62761	1.28175
2.26254e-07	-1.02397	0.284	0.34	0.00762387	cTEC	Fgd6	-2.11782	0.429112	0.234907	0.201531	0.134907	0.517602	0.966518	0.808529	0.745114	0.64574	1.95305	1.08475	0.853571	0.212928	0.0701754	0.134328	0.130435	1.2183	1.13751	1.1458	1.07285	1.59652	1.25255	1.29618	1.46256	1.619	1.76617	1.32562	1.549	1.19809	1.03084	1.04403	1.18111
1.50579e-07	-1.07863	0.21	0.266	0.00507392	cTEC	Vps13c	-2.29466	0.266541	0.301866	0.42602	0.180438	0.356327	0.350446	0.34968	0.36645	0.816143	0.934272	0.59322	1.475	0.323194	0.947368	0.940299	0.347826	1.14459	1.17159	1.29532	1.10988	1.40491	1.09407	1.12108	1.24163	1.77952	1.43323	1.20475	1.72975	1.32254	1.31837	1.4086	1.34354
1.38789e-07	-1.10164	0.18	0.27	0.00467664	cTEC	Eeig2	-2.33007	0.26087	0.420417	0.308673	0.53457	0.238582	0.685268	0.748401	0.693811	0.488789	0.713615	0.627119	0.164286	0.136882	0.219298	1.34328	0.0434783	1.12853	1.23756	1.20866	1.27854	1.28508	1.17759	1.25029	1.35147	1.40398	1.30585	1.20714	1.1348	1.11394	1.06138	1.53012	1.05205
1.29451e-07	-1.01182	0.183	0.277	0.00436198	cTEC	Klhl2	-2.36032	0.238185	0.316136	0.295918	0.11973	0.151522	1.06696	0.941151	0.666938	0.524664	0.699531	0.745763	0.321429	0.174905	0.22807	0.597015	0.478261	1.12212	1.16565	1.23326	1.06874	1.17635	1.25504	1.31423	1.37962	1.4682	1.31337	1.25285	1.17204	1.18469	1.11203	1.37462	1.43491
1.16747e-07	-1.04046	0.185	0.26	0.00393389	cTEC	Sv2b	-2.40518	0.412098	1.3809	0.0382653	0.200675	0.764748	0.699777	0.650746	0.0488599	0.318386	0.0375587	0.152542	0.0714286	0.0342205	0.00877193	0.0149254	0	1.22501	1.66089	1.02783	1.07788	1.77429	1.18619	1.19521	1.03928	1.30467	1.02502	1.04978	1.02471	1.03328	1.00194	1.00356	1
7.42666e-08	-1.13004	0.216	0.258	0.00250249	cTEC	Bach2	-2.60163	0.383743	0.612514	1.63776	0.450253	0.411751	0.402902	0.489552	0.57329	0.2287	0.830986	2.42373	1.24286	1.5019	1.52632	0.626866	0.217391	1.198	1.33922	1.88693	1.25946	1.49362	1.10958	1.18233	1.36242	1.12354	1.42527	1.6908	1.59287	2.19119	1.47218	1.44068	1.33243
4.91408e-08	-1.12623	0.212	0.295	0.00165585	cTEC	Tcf7l1	-2.78098	0.302457	0.470911	0.42602	0.278246	0.298287	0.859375	0.991471	0.59202	0.982063	0.535211	0.694915	0.517857	0.0380228	0.280702	1.34328	0.217391	1.14723	1.27923	1.29088	1.16493	1.36555	1.21691	1.27469	1.31154	1.6034	1.24822	1.20945	1.32888	1.0375	1.09339	1.64278	1.31866
4.55015e-08	-1.08725	0.372	0.42	0.00153322	cTEC	Pnp	-2.8144	0.73724	0.763996	0.997449	0.925801	0.826594	1.52009	1.06482	1.87378	1.53812	0.99061	1.91525	0.503571	0.692015	0.570175	1.62687	0.782609	1.32538	1.3823	1.62995	1.50846	1.83634	1.366	1.31163	1.8701	1.80678	1.397	1.51389	1.32621	1.39307	1.15901	1.7027	1.8708
3.24706e-08	-1.06068	0.295	0.363	0.00109413	cTEC	Samhd1	-2.96093	0.434783	0.403952	0.647959	0.431703	0.545671	1.01004	1.18124	0.901466	1.88789	0.305164	1.45763	0.321429	0.711027	0.596491	0.701493	0.217391	1.22229	1.22966	1.44469	1.2427	1.55647	1.24612	1.36599	1.44087	2.0942	1.14187	1.47388	1.21055	1.3542	1.19581	1.38603	1.31926
2.63941e-08	-2.44563	0.431	0.359	0.000889376	cTEC	Wfdc2	-3.05091	1.29301	1.427	127.056	1.67454	0.250951	2.63951	2.31855	6.67427	0.502242	6.31455	59.1356	1.87857	0.0874525	13.3421	0.134328	0.0869565	1.4717	1.66719	6.48548	1.63702	1.23681	1.55211	1.57326	2.64472	1.31776	2.61143	5.18182	1.69174	1.07599	2.81807	1.07507	1.153
1.71261e-08	-1.22282	0.34	0.296	0.000577083	cTEC	Naa25	-3.23876	0.466919	0.296378	0.252551	0.249578	0.210752	2.60268	3.25416	1.14577	1.01794	0.319249	0.423729	0.221429	0.193916	0.254386	0.19403	0.478261	1.20702	1.16969	1.1723	1.13884	1.2381	1.5714	1.87369	1.63761	1.61921	1.16186	1.1652	1.12587	1.17268	1.08696	1.11776	1.427
1.42725e-08	-1.06405	0.223	0.323	0.000480925	cTEC	Lmtk2	-3.31792	0.355388	0.350165	0.619898	0.27656	0.208849	0.716518	0.832409	0.855863	0.865471	1.46009	0.983051	1.86429	0.61597	0.54386	0.313433	0.173913	1.16836	1.2059	1.42052	1.1521	1.26395	1.20902	1.31041	1.49675	1.68567	1.62666	1.32068	2.01579	1.51486	1.15745	1.13518	1.27836
1.3604e-08	-1.08851	0.244	0.313	0.0004584	cTEC	9530026P05Rik	-3.33876	0.538752	0.739846	1.66327	0.961214	0.513559	0.30692	0.556503	2.50489	0.928251	2.76056	1.89831	2.16786	0.0912548	0.885965	1.91045	0.869565	1.30021	1.42147	1.96855	1.5429	1.5769	1.08916	1.20419	2.12926	1.8149	2.10022	1.57515	2.25039	1.06201	1.31917	1.86193	1.79741
8.47661e-09	-1.07871	0.187	0.278	0.000285628	cTEC	Mob3a	-3.5442	0.240076	0.105379	0.0867347	0.15683	0.162702	1.76674	1.1258	0.488599	0.282511	0.215962	0.118644	0.267857	0.258555	0.0964912	0.164179	0	1.09956	1.05877	1.0577	1.09307	1.15896	1.36841	1.31308	1.25059	1.25464	1.10879	1.03666	1.21885	1.22378	1.02562	1.14545	1
8.45486e-09	-1.19153	0.214	0.276	0.000284895	cTEC	Rasa2	-3.54532	0.275992	0.290889	0.431122	0.252951	0.192436	0.691964	0.744136	0.630293	0.838565	0.723005	0.474576	1.27857	0.657795	0.789474	0.477612	0.0869565	1.12601	1.17195	1.30638	1.1735	1.22742	1.17625	1.26396	1.34311	1.71312	1.32415	1.15761	1.74063	1.60127	1.24023	1.35573	1.13132
8.07611e-09	-1.26475	0.306	0.209	0.000272133	cTEC	Mctp1	-3.56522	1.37996	0.204171	0.798469	0.711636	0.859895	0.546875	0.720682	0.324919	0.147982	2.35211	1.84746	78.4893	0.307985	0.175439	0	0.0434783	1.66045	1.12801	1.49915	1.33291	1.90244	1.13384	1.28386	1.26279	1.15333	1.76058	1.51282	6.37939	1.14103	1.05781	1	1.07333
7.51933e-09	-1.19667	0.221	0.301	0.000253371	cTEC	Lyst	-3.59624	0.296786	0.334797	1.22449	0.325464	0.193863	0.581473	1.0516	0.737785	1.52915	2.46948	0.779661	0.517857	1.49049	0.824561	0.641791	0.0434783	1.16401	1.1926	1.71454	1.17422	1.24647	1.16299	1.3395	1.41274	2.12037	1.93986	1.21776	1.3401	2.15816	1.25817	1.36053	1.06014
4.95136e-09	-1.39699	0.189	0.261	0.000166841	cTEC	Akr1b3	-3.7777	0.236295	0.362239	0.367347	0.408094	0.283302	1.73661	0.582942	0.20114	0.116592	0.276995	0.677966	0.321429	1.15209	1.11404	1.10448	0.217391	1.09588	1.19881	1.22452	1.22475	1.27457	1.38624	1.17418	1.09169	1.08285	1.13637	1.21482	1.12611	1.80777	1.29324	1.55005	1.25068
2.62054e-09	-1.37929	0.2	0.253	8.83017e-05	cTEC	Sema6a	-4.05403	0.387524	0.090011	0.153061	0.684654	0.878211	0.642857	0.352239	0.521173	0.0672646	0.309859	0.0847458	0.614286	0.0380228	0.675439	0.38806	1.73913	1.20405	1.05875	1.0873	1.37765	1.8909	1.17927	1.14649	1.34524	1.10521	1.14852	1.02015	1.20648	1.04298	1.26239	1.15897	2.48821
2.47778e-09	-2.69024	0.253	0.273	8.34913e-05	cTEC	Gstm1	-4.07836	0.793951	1.82986	3.20153	60.9494	0.110133	0.858259	2.32665	1.10261	0.38565	0.211268	4.45763	0.307143	0.0874525	0.245614	3.23881	1.13043	1.27618	1.82263	2.33915	5.44181	1.11918	1.29601	1.60152	1.47312	1.30405	1.11119	2.07364	1.17364	1.06931	1.07268	2.18906	2.1903
2.37102e-09	-1.25667	0.233	0.259	7.98939e-05	cTEC	Tmtc1	-4.09749	0.410208	0.819978	0.334184	0.29511	1.01974	0.198661	0.383369	0.15798	0.0493274	1.04695	0.0508475	0.382143	0.0152091	0.0701754	0.38806	0.217391	1.24319	1.4298	1.27422	1.18736	1.98779	1.0636	1.1838	1.1122	1.05313	1.44781	1.02213	1.15196	1.01976	1.02418	1.19319	1.16443
2.20219e-09	-1.00425	0.231	0.293	7.42048e-05	cTEC	Prdx4	-4.12957	0.298677	0.442371	0.278061	0.612142	0.17745	3.35826	1.12921	0.250814	0.0179372	0.183099	0.661017	0.182143	0.357414	1.30702	1.31343	0.478261	1.11637	1.2279	1.16491	1.32506	1.13252	1.62711	1.29366	1.10538	1.00587	1.06891	1.22069	1.05916	1.14554	1.3066	1.70747	1.6869
1.76323e-09	-1.14432	0.21	0.321	5.94139e-05	cTEC	Asxl3	-4.22611	0.325142	0.264544	0.201531	0.340641	0.506422	2.34821	0.878038	0.647394	0.304933	1.20188	0.932203	0.675	0.0190114	0.0175439	0.507463	0	1.20259	1.17047	1.18375	1.23906	1.57125	1.5612	1.33574	1.36516	1.30746	1.52569	1.31536	1.34234	1.01276	1.00584	1.20875	1
1.369e-09	-1.07793	0.183	0.297	4.613e-05	cTEC	Trim7	-4.33602	0.240076	0.104281	0.160714	0.0893761	0.302093	1.10491	1.05629	0.574919	0.820628	0.323944	0.322034	0.289286	0.0494297	0.22807	0.0597015	0	1.15582	1.06739	1.10457	1.05237	1.3912	1.2822	1.35318	1.38211	1.76941	1.15637	1.11339	1.21957	1.03958	1.06545	1.01982	1
1.33566e-09	-1.4094	0.208	0.274	4.50065e-05	cTEC	Irak2	-4.34672	0.289225	0.240395	0.82398	0.279933	0.142008	0.393973	0.741151	1.94544	0.793722	1.20188	0.559322	0.55	0.361217	0.0701754	0.134328	0.304348	1.12277	1.13077	1.51328	1.14375	1.19083	1.11421	1.24516	1.88043	1.61159	1.53141	1.21847	1.36344	1.24856	1.01806	1.07499	1.40198
1.19973e-09	-1.05587	0.388	0.323	4.04261e-05	cTEC	Cryab	-4.39334	0.729679	1.42481	3.58673	3.93592	0.643673	1.02902	1.47377	1.33958	0.856502	1.73239	6	1.55357	0.0342205	0.140351	3.61194	0	1.29992	1.62118	2.43004	2.39308	1.43536	1.22933	1.40495	1.54976	1.42662	1.75729	2.47786	1.4253	1.01901	1.03748	2.89063	1
7.82462e-10	-1.63341	0.187	0.268	2.63658e-05	cTEC	Slc7a11	-4.57896	0.36862	0.256861	1.05867	0.219224	1.00119	1.26339	0.85032	0.787459	1.57848	0.126761	0.0677966	0.353571	0.730038	0.0175439	0.283582	0	1.19031	1.14775	1.70224	1.11268	1.79295	1.34382	1.29804	1.47566	2.11127	1.0853	1.01973	1.1389	1.65053	1.00592	1.36322	1
7.08426e-10	-1.29877	0.146	0.259	2.38711e-05	cTEC	Zfp521	-4.62213	0.247637	0.197585	0.186224	0.32715	0.856327	0.877232	0.360341	0.11645	0.058296	0.0328638	0.0508475	0.160714	0.0760456	0.307018	1.23881	0.0434783	1.19448	1.12609	1.14327	1.22453	1.86145	1.25314	1.1452	1.06579	1.06265	1.0182	1.02115	1.09276	1.06598	1.11277	1.53705	1.05222
5.8691e-10	-1.15378	0.284	0.342	1.97765e-05	cTEC	Dgkz	-4.70385	0.404537	0.260154	0.25	0.60371	0.759753	0.691964	0.278038	0.434039	0.452915	0.802817	0.745763	0.55	0.456274	0.0438596	0.164179	0.217391	1.2274	1.15494	1.19012	1.30973	1.82944	1.18231	1.10002	1.30328	1.44741	1.39259	1.23158	1.38157	1.51386	1.0146	1.10369	1.33841
4.57795e-10	-1.12036	0.138	0.257	1.54259e-05	cTEC	Dnase1l3	-4.81175	0.393195	0.0109769	0.0535714	0.0185497	0.0632731	1.85826	2.99104	2.36726	1.37668	0.112676	0.101695	0.0571429	0.418251	0.00877193	0.0298507	0	1.1745	1.0064	1.04943	1.01157	1.06409	1.40594	1.74745	1.87957	1.70327	1.06305	1.03343	1.05122	1.18281	1.00146	1.01547	1
4.22673e-10	-1.09888	0.308	0.392	1.42424e-05	cTEC	Nlk	-4.84642	0.461248	0.514819	0.84949	0.403035	0.313987	1.09152	1.47846	0.984528	0.488789	2.1784	1.0339	5.13214	0.714829	3.54386	0.58209	0.173913	1.22894	1.30264	1.51398	1.22324	1.36356	1.26583	1.45815	1.50316	1.38445	1.84942	1.32344	2.65418	1.64795	1.8746	1.30703	1.24354
4.13667e-10	-1.24762	0.25	0.272	1.39389e-05	cTEC	Cd44	-4.85577	0.468809	0.683864	0.617347	0.674536	0.505709	1.18973	0.336887	1.33388	0.0762332	0.643192	0.135593	2.71429	0.65019	0	0.61194	0.0434783	1.19828	1.35283	1.35916	1.36113	1.55514	1.31143	1.12032	1.69901	1.05352	1.35017	1.03815	2.06018	1.36461	1	1.34704	1.08811
3.78197e-10	-1.17032	0.206	0.315	1.27437e-05	cTEC	Lcorl	-4.8947	0.319471	0.407245	0.846939	0.399663	0.248097	1.08371	0.838806	0.786645	0.363229	2.10798	1.13559	1.54286	0.878327	1.42105	0.223881	0.434783	1.15996	1.22209	1.51364	1.21417	1.2923	1.28636	1.29529	1.40128	1.33818	1.79023	1.3151	1.83839	1.65215	1.44373	1.17874	1.54828
3.42575e-10	-1.06393	0.276	0.37	1.15434e-05	cTEC	Cpq	-4.93767	0.470699	0.829857	1.93878	0.715008	0.708849	0.725446	0.534755	0.5057	0.318386	1.56808	2.84746	0.735714	0.1673	3.31579	3.86567	0.304348	1.24571	1.45108	1.95682	1.39393	1.6788	1.1929	1.18151	1.2822	1.23717	1.71227	1.76115	1.33448	1.0973	1.76378	2.22283	1.40137
2.64832e-10	-1.21991	0.219	0.301	8.92377e-06	cTEC	Ttyh2	-5.04945	0.306238	0.102086	0.165816	0.210793	0.168887	0.926339	1.56716	1.12622	0.547085	0.657277	0.0338983	0.378571	0.0494297	0.0701754	0.955224	0	1.13094	1.05994	1.14578	1.12366	1.19875	1.22672	1.46646	1.57857	1.50361	1.29675	1.00714	1.23961	1.04394	1.02452	1.51517	1
2.45871e-10	-1.14691	0.285	0.374	8.28488e-06	cTEC	Apobec1	-5.08171	0.565217	0.351262	0.415816	0.490725	0.324929	0.898438	1.86354	2.75896	3.00897	0.460094	0.271186	0.946429	0.205323	0.131579	0.19403	0.130435	1.25458	1.19173	1.33012	1.26887	1.37808	1.22229	1.56554	2.15342	2.59927	1.21829	1.10953	1.57926	1.17669	1.06936	1.14817	1.25053
2.18912e-10	-1.37728	0.149	0.258	7.37646e-06	cTEC	Ltbp2	-5.13215	0.21172	0.0757409	0.607143	0.232715	0.366556	0.600446	0.596588	0.595277	0.327354	0.469484	3.55932	0.0607143	0.0228137	0.184211	0.223881	0.0434783	1.1293	1.05169	1.43316	1.15697	1.46933	1.1742	1.21165	1.4052	1.31085	1.22234	1.90581	1.05149	1.02282	1.07395	1.08068	1.11371
2.15927e-10	-1.2677	0.244	0.334	7.27589e-06	cTEC	Flvcr1	-5.13811	0.408318	0.400659	0.313776	0.269815	0.425785	1.07031	1.79957	1.18241	1.09865	0.906103	0.220339	0.296429	0.361217	0.27193	0.0746269	0.173913	1.19246	1.20676	1.27455	1.16653	1.44218	1.26814	1.5631	1.57345	1.82852	1.4358	1.10208	1.24328	1.29686	1.1059	1.07845	1.20407
2.06362e-10	-1.42999	0.257	0.337	6.95358e-06	cTEC	Cadps2	-5.15779	0.404537	0.201976	1.74235	0.652614	0.467888	1.27679	1.04307	0.795603	0.327354	3.25352	1.89831	8.96429	0.0494297	0.105263	0.447761	0	1.22312	1.12123	1.9395	1.40743	1.53349	1.34473	1.33986	1.43787	1.32216	2.10418	1.5489	3.39048	1.04801	1.03448	1.20175	1
1.90983e-10	-1.21007	0.406	0.387	6.43537e-06	cTEC	Ccl27a	-5.19143	0.722117	0.560922	0.211735	0.441821	0.376784	1.24107	4.07463	4.31189	0.331839	1.10329	0.728814	0.671429	0.155894	1.01754	0.253731	0.0434783	1.29545	1.29036	1.1567	1.23756	1.33666	1.30093	2.00051	2.36842	1.37782	1.46392	1.27471	1.28715	1.13381	1.26983	1.15016	1.07333
1.86223e-10	-1.41347	0.221	0.281	6.27497e-06	cTEC	Arg2	-5.20239	0.442344	0.0548847	0.170918	0.809444	0.059705	1.35268	5.14712	1.2842	0.161435	0.239437	1.05085	0.178571	0.0570342	0.0263158	0.0149254	0	1.15962	1.03203	1.13262	1.36802	1.07192	1.28922	2.0228	1.54756	1.11613	1.10761	1.30932	1.09777	1.05104	1.00856	1.00287	1
1.78396e-10	-1.15387	0.189	0.3	6.01125e-06	cTEC	Prps1	-5.22104	0.257089	0.248079	0.142857	0.317032	0.245243	1.82701	1.65842	0.703583	0.161435	0.234742	0.169492	0.178571	0.361217	0.27193	0.149254	0.173913	1.12829	1.13188	1.0953	1.16366	1.26509	1.37033	1.41225	1.29701	1.09135	1.12083	1.06495	1.0938	1.24878	1.06468	1.07185	1.2175
1.73258e-10	-1.35184	0.161	0.268	5.83809e-06	cTEC	Dtx2	-5.23373	0.189036	0.145993	0.321429	0.150084	0.122027	0.766741	1.70533	0.814332	0.282511	0.164319	0.355932	0.235714	0.171103	0.210526	0.268657	0.0869565	1.0987	1.08689	1.23973	1.08975	1.14634	1.18912	1.45551	1.41231	1.27481	1.08824	1.13183	1.16052	1.17538	1.06457	1.12835	1.09786
1.70887e-10	-1.31937	0.246	0.329	5.7582e-06	cTEC	Hspa4l	-5.23971	0.383743	0.197585	0.739796	0.261383	0.16294	1.87054	1.55224	1.057	0.251121	4.67606	0.983051	2.57857	0.676806	0.877193	0.38806	0.0869565	1.15887	1.10618	1.45675	1.15103	1.19069	1.41405	1.44542	1.50501	1.18199	2.43001	1.2897	2.16284	1.59303	1.26254	1.2643	1.11149
1.60967e-10	-1.08436	0.301	0.335	5.42396e-06	cTEC	Greb1l	-5.26568	0.546314	0.32382	0.288265	0.178752	1.17578	1.01228	0.798294	0.838762	0.426009	1.58216	0.220339	1.58214	0.0494297	0.122807	0.19403	0	1.32792	1.19039	1.17423	1.11027	2.06023	1.26923	1.29456	1.48541	1.32275	1.65081	1.0953	1.84821	1.04608	1.03636	1.06637	1
1.46792e-10	-1.06888	0.265	0.327	4.94629e-06	cTEC	Ube2l6	-5.30572	0.483932	0.592755	0.596939	0.401349	0.306613	0.601562	1.73987	1.58143	1.5426	0.530516	0.949153	0.196429	0.285171	0.324561	0.746269	0.391304	1.16517	1.31466	1.33571	1.24074	1.23487	1.15494	1.4442	1.5955	1.71075	1.23482	1.35325	1.10709	1.12946	1.07932	1.35056	1.56132
1.43304e-10	-1.34921	0.153	0.266	4.82878e-06	cTEC	Nrep	-5.31616	0.224953	0.147091	0.112245	0.210793	0.282588	1.69196	1.52878	0.368893	0.627803	0.131455	0.372881	3.15357	0.0152091	0.114035	0.567164	0.130435	1.12628	1.07526	1.07955	1.10928	1.31694	1.36576	1.42853	1.20447	1.3722	1.06956	1.08362	1.97289	1.014	1.03293	1.28501	1.25363
1.34475e-10	-1.74958	0.153	0.262	4.53126e-06	cTEC	Kdm2b	-5.34378	0.224953	0.165752	0.221939	0.160202	0.138202	1.1183	1.5548	1.40065	0.340807	1.25352	0.338983	0.239286	1.65779	0.201754	0.208955	0.0869565	1.10745	1.09371	1.17579	1.0785	1.16722	1.28769	1.51527	1.64972	1.28489	1.50808	1.11832	1.15556	2.22898	1.0728	1.12495	1.13139
1.27014e-10	-1.39626	0.149	0.262	4.27987e-06	cTEC	Cdkn2b	-5.36857	0.26087	0.0307355	0.377551	0.320405	0.0630352	0.873884	1.41834	2.23046	1.03587	0.976526	0.20339	0.364286	0.0494297	0.0350877	0.298507	0	1.10769	1.01783	1.21745	1.16761	1.06605	1.18877	1.37962	1.85689	1.66272	1.40881	1.07569	1.22598	1.03017	1.00828	1.18976	1
1.06231e-10	-1.05306	0.28	0.337	3.57957e-06	cTEC	Zbp1	-5.44617	0.483932	0.570801	1.30357	0.519393	0.732873	0.524554	0.544563	0.862378	0.242152	1.15493	1.22034	0.242857	0.334601	0	0.298507	0	1.20098	1.3122	1.72241	1.31708	1.58162	1.15471	1.16797	1.39225	1.12835	1.46192	1.43618	1.13377	1.23266	1	1.16384	1
8.48419e-11	-1.22817	0.214	0.276	2.85883e-06	cTEC	L3mbtl3	-5.54381	0.294896	0.515917	0.494898	0.527825	0.525214	0.71317	0.257996	0.258958	1.18834	0.239437	0.542373	1.04286	0.863118	0.72807	0.567164	0.130435	1.1712	1.28706	1.34429	1.29875	1.55922	1.19227	1.0966	1.16876	2.02966	1.12257	1.17212	1.58789	1.81335	1.2352	1.28951	1.15401
6.86962e-11	-1.29047	0.163	0.276	2.31479e-06	cTEC	C9orf72	-5.63549	0.194707	0.126235	0.142857	0.106239	0.155328	0.872768	1.28145	0.690554	0.426009	0.492958	0.237288	0.307143	0.193916	0.131579	0.134328	0	1.09862	1.07059	1.11012	1.05904	1.17776	1.19787	1.3806	1.39446	1.41187	1.23513	1.09121	1.20713	1.13003	1.05818	1.08654	1
5.33107e-11	-1.11183	0.346	0.364	1.79636e-06	cTEC	Ssh2	-5.74561	0.663516	0.686059	1.67347	0.48398	0.432683	1.13393	0.749254	1.39984	1.13901	5	1.45763	3.61071	2.09125	0.614035	1.19403	0.391304	1.2815	1.36915	1.93279	1.26544	1.48693	1.30017	1.3092	1.73642	1.80381	2.53514	1.42968	2.45129	2.26638	1.25736	1.54236	1.48137
4.33969e-11	-1.05995	0.448	0.518	1.4623e-06	cTEC	Rnf19b	-5.83496	1.03403	0.500549	0.839286	0.581788	1.41484	1.94085	2.56844	2.07818	1.13004	1.07042	0.745763	1.02143	0.806084	0.394737	0.373134	0.26087	1.51307	1.26996	1.60472	1.32643	2.30051	1.53184	1.78558	1.98599	1.77374	1.48319	1.28273	1.61471	1.51537	1.15432	1.17482	1.35132
4.22665e-11	-1.3953	0.204	0.259	1.42421e-06	cTEC	Dipk2a	-5.84643	0.31569	0.264544	0.252551	0.274874	0.863463	0.477679	0.248614	0.296417	0.224215	0.507042	0.661017	0.246429	0.30038	0.0614035	0.208955	0.304348	1.17699	1.14758	1.19437	1.16506	1.82184	1.15277	1.09801	1.19508	1.19473	1.24523	1.20987	1.15771	1.30124	1.01438	1.07856	1.43819
3.09593e-11	-1.4518	0.185	0.255	1.0432e-06	cTEC	Trim30a	-5.98163	0.287335	0.353458	1.07653	0.409781	0.581827	0.323661	0.334755	0.390065	0.215247	0.103286	0.59322	0.171429	0.471483	0.0614035	0.776119	0.391304	1.1445	1.21171	1.67288	1.26657	1.62517	1.10037	1.11688	1.23253	1.19453	1.04318	1.23235	1.12933	1.32747	1.01754	1.44338	1.57798
2.77013e-11	-1.34248	0.229	0.348	9.33423e-07	cTEC	Lgals1	-6.02992	0.73913	0.869374	0.0586735	1.914	2.06137	4.35045	1.20554	0.370521	0.0538117	0.244131	0.610169	1.60714	3.1673	0.692982	21.3433	0.130435	1.33336	1.42576	1.04602	1.887	2.06197	1.83252	1.318	1.1785	1.05606	1.12924	1.30455	1.36664	2.17545	1.19248	4.07595	1.16989
2.57055e-11	-1.22058	0.223	0.321	8.66173e-07	cTEC	Ttll5	-6.0624	0.300567	0.240395	0.27551	0.269815	0.273787	0.919643	1.69382	1.10912	0.538117	0.699531	0.745763	0.403571	0.197719	0.210526	0.19403	0	1.15794	1.15148	1.19555	1.15844	1.31002	1.23282	1.49968	1.56207	1.49212	1.30043	1.25095	1.27662	1.2071	1.08036	1.11529	1
2.20373e-11	-1.57441	0.144	0.257	7.42568e-07	cTEC	Mad1l1	-6.12926	0.179584	0.147091	0.227041	0.124789	0.160086	0.854911	1.3838	0.379479	0.242152	0.356808	0.491525	0.210714	1.18251	0.157895	0.179104	0.130435	1.09358	1.08044	1.16938	1.06852	1.21013	1.23819	1.43296	1.23962	1.26887	1.16645	1.15306	1.11682	2.051	1.06323	1.10217	1.20618
2.12759e-11	-1.2719	0.164	0.28	7.16913e-07	cTEC	S100a3	-6.14453	0.289225	0.0318332	0.0255102	0.0185497	0.0825404	3.52567	4.07974	0.842834	0.0403587	0.056338	0.271186	0.0214286	0.0304183	0.00877193	0.0298507	0	1.15741	1.02105	1.02286	1.01115	1.09059	1.70449	1.91761	1.35657	1.03388	1.03294	1.10012	1.00938	1.0363	1.00253	1.03011	1
2.04861e-11	-1.28934	0.223	0.292	6.90299e-07	cTEC	Smim22	-6.16096	0.336484	0.383095	1.71173	0.541315	0.142483	0.607143	0.770576	1.307	1	3.42254	3.01695	2.40714	0.0190114	2.75439	0.0447761	0	1.14089	1.20398	1.80112	1.25238	1.14426	1.14846	1.24834	1.59981	1.6728	2.19924	1.80546	2.09794	1.00945	1.59397	1.01945	1
1.90479e-11	-1.0601	0.35	0.433	6.41837e-07	cTEC	Phlpp1	-6.19258	0.659735	0.693743	1.18622	0.795953	0.526879	2.03013	1.60981	1.31433	1.52018	2.21596	1.0339	1.25714	0.973384	0.719298	0.61194	0.565217	1.30264	1.38702	1.70384	1.41497	1.57925	1.50499	1.5303	1.67174	2.11608	1.81909	1.35607	1.71411	1.66092	1.23729	1.37278	1.59554
1.78537e-11	-1.24625	0.251	0.341	6.01599e-07	cTEC	Rassf3	-6.22069	0.349716	0.178924	0.770408	0.475548	0.157231	1.15513	1.21407	1.85505	0.820628	2.22066	2.08475	0.785714	0.536122	0.263158	0.38806	0.478261	1.15939	1.09994	1.48655	1.23885	1.18464	1.29697	1.38424	1.83135	1.63274	1.88035	1.60858	1.40512	1.30431	1.07235	1.24527	1.70607
1.78178e-11	-1.49718	0.159	0.271	6.0039e-07	cTEC	Rilpl2	-6.22157	0.189036	0.19539	0.117347	0.247892	0.0818268	1.39844	1.17569	0.818404	0.251121	0.600939	0.237288	0.628571	1.72624	0.719298	0.134328	0.0434783	1.08533	1.10854	1.0737	1.13575	1.07919	1.30966	1.33624	1.39773	1.16312	1.24535	1.09595	1.33705	2.07707	1.18117	1.07776	1.02566
1.56216e-11	-1.27633	0.221	0.303	5.26385e-07	cTEC	Klf13	-6.2787	0.344045	0.287596	0.744898	0.780776	0.433397	0.464286	0.296802	0.668567	0.461883	1.51643	1.66102	0.65	1.75665	0.54386	1.35821	1.65217	1.16301	1.16103	1.47636	1.40385	1.45642	1.12329	1.10197	1.40288	1.43265	1.65414	1.44284	1.36814	2.30458	1.17129	1.70471	2.41785
1.08271e-11	-1.21593	0.471	0.514	3.64828e-07	cTEC	Ahcyl2	-6.43791	1.06994	0.706915	0.617347	0.946037	0.516175	1.76116	2.74797	6.7671	8.7713	5.26291	1.84746	3.06786	1.20152	0.947368	0.134328	0.173913	1.45959	1.39187	1.43769	1.44359	1.52795	1.41619	1.78836	2.95992	3.65895	2.52184	1.50607	2.31887	1.85692	1.26741	1.04266	1.20188
8.52824e-12	-1.02079	0.448	0.468	2.87367e-07	cTEC	Id2	-6.54156	1.95085	3.25796	1.02551	8.31872	2.48549	2.04688	1.11727	0.843648	1.91928	2.81221	5.16949	2.36071	1.72624	0.289474	0.880597	0.434783	1.66704	2.14487	1.6473	2.91665	2.6122	1.51943	1.34152	1.47085	1.98469	2.00706	2.06849	1.78477	1.99896	1.06914	1.40744	1.52944
7.29159e-12	-1.81279	0.206	0.303	2.45698e-07	cTEC	Cacna1a	-6.6096	0.26087	0.334797	0.262755	0.284992	0.2098	0.794643	2.01493	0.672638	0.681614	7.09859	0.830508	0.532143	0.0836502	0.0614035	0.597015	0	1.11876	1.18455	1.19018	1.14433	1.22815	1.19051	1.65054	1.37373	1.63449	2.89162	1.27911	1.33177	1.06991	1.01634	1.22312	1
6.35256e-12	-1.06903	0.306	0.404	2.14056e-07	cTEC	Ksr1	-6.66947	0.478261	0.265642	0.147959	0.470489	0.441722	1.86942	1.98891	1.71254	0.313901	0.723005	0.355932	0.25	0.197719	0.0701754	0.940299	0.130435	1.26117	1.1594	1.13301	1.22402	1.51102	1.44971	1.65518	1.87177	1.26866	1.33698	1.12414	1.1754	1.20103	1.02479	1.48524	1.20656
5.62461e-12	-1.25874	0.216	0.358	1.89527e-07	cTEC	Il23a	-6.72233	0.536862	0.0735456	0.0663265	0.177066	0.498811	4.22098	4.06269	2.30049	0.919283	0.769953	0.271186	0.342857	0.0532319	0.00877193	0	0	1.27682	1.04473	1.05914	1.09642	1.50979	1.8059	1.94171	1.92509	1.54904	1.35262	1.10796	1.12996	1.05129	1.00154	1	1
4.74721e-12	-1.14823	0.21	0.344	1.59962e-07	cTEC	Glipr2	-6.79598	0.306238	0.0713502	0.298469	0.279933	0.31922	1.71094	1.36674	1.42101	1.43946	0.413146	0.0847458	0.196429	0.311787	0.0175439	0.910448	0	1.15536	1.04383	1.17305	1.17298	1.29157	1.3653	1.37321	1.59916	1.93301	1.2236	1.05985	1.11255	1.20421	1.0034	1.35654	1
4.1637e-12	-1.01646	0.371	0.416	1.403e-07	cTEC	Map2	-6.85294	0.809074	1.10977	1.77296	1.1113	1.08801	2.19754	0.432836	0.707655	0.573991	7.04695	6.32203	3.91429	0.0608365	0.219298	0.119403	0.0434783	1.39568	1.56569	1.96396	1.57659	1.96715	1.57218	1.19334	1.4604	1.39044	2.84642	2.27694	2.44701	1.04152	1.1009	1.10517	1.06095
4.04337e-12	-1.46849	0.155	0.269	1.36245e-07	cTEC	Arfgap3	-6.86568	0.192817	0.186608	0.321429	0.256324	0.130828	0.684152	0.982942	0.593648	0.403587	0.732394	1.89831	0.396429	0.148289	0.54386	0.597015	0.130435	1.07823	1.11301	1.21762	1.14572	1.14651	1.16557	1.29574	1.31851	1.33634	1.33026	1.5441	1.29694	1.09141	1.17125	1.30221	1.22234
2.8828e-12	-1.143	0.344	0.401	9.71387e-08	cTEC	Rsbn1	-7.01261	0.504726	0.464325	0.515306	0.379427	0.35157	2.32812	2.49723	0.899023	0.421525	1.32864	1.05085	0.821429	0.60076	0.640351	0.373134	0.130435	1.22931	1.26052	1.36125	1.20957	1.39906	1.5034	1.69904	1.48071	1.40768	1.61618	1.31793	1.48705	1.58224	1.17723	1.19664	1.18348
2.6724e-12	-1.13218	0.352	0.44	9.00491e-08	cTEC	Rnf180	-7.04552	0.621928	0.3809	0.109694	0.209106	0.669838	2.48549	2.56588	2.31678	0.730942	2.35211	0.288136	0.757143	0.285171	0.210526	0.0298507	0	1.32532	1.21897	1.08595	1.12278	1.68742	1.55083	1.74827	2.07658	1.5299	1.95837	1.12445	1.29815	1.1639	1.06567	1.02467	1
2.63108e-12	-1.23649	0.641	0.657	8.8657e-08	cTEC	Macrod2	-7.05229	3.33837	2.22064	0.890306	1.07083	7.73192	7.39286	5.30576	1.20765	0.892377	3.50704	0.779661	12.6536	0.193916	2.45614	0.656716	0.0869565	2.1798	1.92916	1.55933	1.48861	3.86767	2.27643	2.28352	1.61706	1.65952	2.20514	1.27928	3.78737	1.15279	1.7585	1.63381	1.16185
2.03057e-12	-1.16598	0.403	0.459	6.8422e-08	cTEC	Fhit	-7.1648	0.992439	1.89243	1.90816	1.41821	0.498811	2.00335	4.7113	1.82003	1.67713	2.4507	3.23729	2.45	1.19772	4.12281	0.731343	0	1.4296	1.84238	1.98832	1.66847	1.53083	1.49335	2.23386	1.88682	2.0147	1.84242	1.87873	2.26325	2.09451	2.19901	1.48845	1
2.00965e-12	-1.0267	0.289	0.306	6.77172e-08	cTEC	Syne2	-7.1693	0.42155	0.679473	0.846939	0.946037	0.492864	0.648438	0.445629	0.473941	0.134529	0.286385	2.15254	0.710714	0.121673	0.789474	1.41791	0.565217	1.21315	1.36493	1.55227	1.47427	1.60541	1.2091	1.16086	1.31216	1.13689	1.12925	1.53296	1.46607	1.07852	1.23584	1.80017	1.63869
1.77985e-12	-1.33289	0.197	0.324	5.99739e-08	cTEC	Mgat4a	-7.22204	0.300567	0.197585	0.558673	0.441821	0.287583	1.42634	0.803838	0.815147	1.42152	0.849765	0.474576	0.725	0.657795	0.0701754	0.179104	0.26087	1.14571	1.11654	1.35268	1.23171	1.33952	1.34441	1.27537	1.47961	2.03259	1.41877	1.16379	1.54075	1.52439	1.01712	1.08089	1.37278
1.74026e-12	-1.17408	0.607	0.552	5.86397e-08	cTEC	Polr2a	-7.23181	1.9414	1.1438	1.46173	1.35582	3.58682	2.29464	2.07463	2.55049	1.30493	2.44601	2.15254	2.8	1.24715	1.44737	0.58209	0.608696	1.84674	1.56601	1.90066	1.64404	3.18568	1.61552	1.65772	2.43511	2.11504	2.01406	1.56527	2.48614	1.99554	1.44088	1.37221	1.74867
1.65335e-12	-1.43155	0.185	0.282	5.57113e-08	cTEC	Ulk4	-7.25406	0.224953	0.215148	0.147959	0.123103	0.100143	0.734375	2.71898	0.740228	0.161435	0.535211	0.338983	0.289286	0.0722433	0.315789	0.0447761	0	1.10932	1.11961	1.09877	1.0628	1.10967	1.17096	1.69611	1.37777	1.15048	1.27761	1.10239	1.18356	1.08064	1.12419	1.01397	1
1.48241e-12	-1.29457	0.302	0.413	4.99514e-08	cTEC	Enox2	-7.30145	0.529301	0.666301	0.729592	0.532884	0.440771	2.04911	1.84136	1.13925	4.48879	1.42254	1.38983	1.79286	0.509506	0.561404	0.522388	0.173913	1.24918	1.38315	1.46323	1.29314	1.47837	1.44472	1.58105	1.56787	3.08054	1.57599	1.43175	1.86406	1.40108	1.19702	1.34605	1.24055
1.31521e-12	-1.26631	0.234	0.365	4.43172e-08	cTEC	Epb41	-7.35343	0.376181	0.28101	0.780612	0.416526	0.339676	0.965402	1.22559	1.09691	0.605381	1.47887	1.72881	1.08214	2.19011	0.77193	0.343284	0.434783	1.19673	1.17281	1.49137	1.22066	1.41309	1.25016	1.40167	1.59439	1.47305	1.63758	1.50333	1.61969	2.40935	1.27599	1.22769	1.55886
7.21657e-13	-1.07788	0.55	0.601	2.43169e-08	cTEC	Cald1	-7.61409	2.76749	2.00878	2.31633	2.97976	6.7638	3.3404	0.569723	1.01873	2.73543	0.56338	1.57627	2.81429	0.125475	0.298246	8.32836	2	2.11458	1.84469	2.17803	2.27752	3.75149	1.77886	1.20723	1.61062	2.65602	1.30011	1.47264	2.17056	1.11502	1.10438	3.34505	2.66033
4.91251e-13	-1.26835	0.391	0.349	1.65532e-08	cTEC	Trpm3	-7.78112	1.24197	3.77387	0.528061	11.6476	0.818982	0.667411	4.33348	0.721498	0.887892	1.06103	1.20339	0.714286	0.0836502	1.44737	0.328358	0.391304	1.49355	2.44659	1.35646	3.54285	1.80205	1.22417	2.18281	1.40198	1.77406	1.53555	1.39647	1.41981	1.05476	1.49488	1.099	1.44863
4.70334e-13	-1.11838	0.357	0.455	1.58484e-08	cTEC	Sik3	-7.80002	0.618147	0.66191	0.729592	0.763912	0.367269	1.70089	1.83795	1.55456	0.883408	4.82629	2.20339	2.18571	3.04183	1.9386	1.65672	0.478261	1.29896	1.3667	1.45845	1.3739	1.42496	1.43823	1.57402	1.757	1.6804	2.46437	1.61081	2.10307	2.76446	1.54163	1.66161	1.42299
3.20336e-13	-1.13838	0.216	0.354	1.0794e-08	cTEC	Cep162	-7.96682	0.321361	0.22393	0.270408	0.160202	0.35823	2.05915	1.49041	0.511401	0.430493	0.624413	0.288136	0.228571	0.0988593	0.578947	0.134328	0	1.16952	1.14474	1.20046	1.10323	1.40145	1.46977	1.46164	1.31442	1.36827	1.29986	1.12829	1.14513	1.09223	1.22245	1.09744	1
2.85052e-13	-1.61252	0.132	0.251	9.60512e-09	cTEC	Serpina3g	-8.0175	0.206049	0.0581778	0.170918	0.0758853	0.360133	1.23549	2.54925	0.406352	0.0269058	0.131455	0.101695	0.05	0.205323	0.0175439	0.313433	0	1.09867	1.03099	1.12816	1.04866	1.27398	1.26839	1.60967	1.1916	1.01844	1.05503	1.03498	1.03193	1.09004	1.00348	1.15218	1
2.43587e-13	-1.38696	0.208	0.331	8.20792e-09	cTEC	Mgat5	-8.08577	0.300567	0.345774	0.329082	0.18887	0.470742	0.476562	0.892964	1.19544	0.269058	2.52113	0.491525	1.67857	2.26996	1.07018	0.283582	0.130435	1.20068	1.20022	1.24418	1.12702	1.53801	1.15564	1.33597	1.64671	1.20831	1.96441	1.18167	1.94229	2.57855	1.33988	1.10923	1.19328
2.42677e-13	-1.52382	0.155	0.285	8.17726e-09	cTEC	Prorp	-8.08739	0.185255	0.149286	0.290816	0.209106	0.145814	0.695312	1.80597	1.73046	1.21076	0.676056	0.305085	0.382143	0.136882	0.324561	0.119403	0	1.11502	1.08148	1.18826	1.10875	1.18851	1.17024	1.49313	1.6962	1.76047	1.30231	1.10517	1.19223	1.11082	1.10442	1.03448	1
2.17994e-13	-1.35173	0.253	0.358	7.34552e-09	cTEC	Atp13a3	-8.13398	0.357278	0.687157	1.23724	0.357504	0.468601	1.46875	0.774414	0.438925	0.654709	0.821596	1.94915	0.625	1.25475	0.736842	0.552239	0.217391	1.16802	1.36493	1.71689	1.17598	1.49331	1.34423	1.25324	1.27134	1.5065	1.37575	1.50876	1.30568	1.84788	1.21546	1.33774	1.32398
1.97615e-13	-1.32593	0.244	0.3	6.65884e-09	cTEC	Camk2d	-8.1766	0.391304	0.794731	0.793367	1.65767	0.290676	0.246652	0.497655	0.882736	1.48879	2.13146	0.338983	5.04643	0.980989	0.991228	3.41791	0.73913	1.20033	1.44009	1.5508	1.81026	1.3436	1.07158	1.18379	1.47471	2.0001	1.88058	1.10059	2.89362	1.80269	1.28251	2.38985	1.72375
1.73469e-13	-1.42037	0.185	0.323	5.84521e-09	cTEC	Thrb	-8.2332	0.319471	1.38529	0.579082	0.647555	0.210514	1.72991	1.68017	1.25244	0.807175	2.14085	1.32203	0.707143	0.136882	0.596491	0.447761	0	1.18097	1.73688	1.37364	1.31469	1.26088	1.40211	1.55415	1.64931	1.66697	1.81857	1.41607	1.44283	1.15578	1.17326	1.21278	1
1.49295e-13	-1.02444	0.526	0.568	5.03064e-09	cTEC	Gem	-8.29838	2.28355	0.608123	0.267857	1.19562	3.41246	8.99665	7.74712	2.21417	0.919283	2.75117	1.28814	0.560714	0.768061	0.947368	2.53731	0.434783	1.89706	1.31366	1.23117	1.69855	2.97796	2.37076	2.53345	2.01335	1.63319	1.96466	1.43442	1.25012	1.52032	1.22968	2.02925	1.27535
1.27986e-13	-1.07178	0.142	0.283	4.3126e-09	cTEC	Cxcl11	-8.36526	0.655955	0.00768386	0.0280612	0.0893761	0.346099	3.72991	5.05075	1.45195	0.143498	0.122066	0.0338983	0.0178571	0.00380228	0.0263158	0.0149254	0	1.26521	1.00753	1.02036	1.05202	1.35059	1.6979	2.05205	1.68352	1.05749	1.07986	1.01696	1.0146	1.00072	1.00664	1.00759	1
1.2078e-13	-1.03896	0.611	0.698	4.06979e-09	cTEC	Robo1	-8.39043	2.72212	1.35126	1.80867	1.41821	5.83896	5.06362	4.01151	2.27769	0.672646	1.53991	1.10169	3.65	0.110266	0.210526	2.56716	0	2.15176	1.67791	2.02535	1.76719	3.67139	2.05687	2.05891	2.09627	1.52626	1.67443	1.34015	2.48751	1.09832	1.05383	1.85394	1
6.53798e-14	-1.30395	0.151	0.293	2.20304e-09	cTEC	Selenom	-8.65698	0.582231	0.514819	0.27551	5.06071	0.114891	0.94308	1.38849	4.24349	3.18386	4.43192	1.98305	4.83571	0.243346	3.49123	6.53731	1.65217	1.27505	1.27516	1.2004	2.46958	1.09118	1.23224	1.38413	2.401	2.40638	2.37005	1.6552	2.66516	1.1314	1.74383	3.04114	2.2995
5.85056e-14	-1.45631	0.242	0.34	1.9714e-09	cTEC	Slco5a1	-8.70522	0.438563	0.064764	0.0229592	0.0404722	0.138915	2.15513	5.27591	1.76547	1.63677	0.446009	0.0847458	0.789286	0.110266	0.0438596	0.0298507	0	1.2321	1.0344	1.0206	1.024	1.16433	1.50252	2.27588	1.85137	2.15465	1.20404	1.02724	1.51261	1.10735	1.01245	1.0108	1
5.75025e-14	-1.09157	0.31	0.393	1.9376e-09	cTEC	Caap1	-8.71273	0.42344	0.397366	0.387755	0.359191	0.267364	2.39621	2.87249	0.582248	0.73991	0.633803	0.627119	0.475	0.30038	0.649123	0.208955	0.130435	1.19678	1.22962	1.27233	1.19818	1.28535	1.49364	1.72719	1.29042	1.47269	1.29831	1.22276	1.2606	1.2408	1.21853	1.17977	1.2184
4.51983e-14	-1.49512	0.172	0.299	1.523e-09	cTEC	Efhd2	-8.8173	0.20794	0.164654	0.357143	0.220911	0.205519	1.19085	0.660981	0.986971	1.24215	0.713615	0.457627	0.860714	0.813688	0.175439	0.701493	0.0869565	1.09455	1.08804	1.25302	1.13211	1.20846	1.26856	1.19597	1.47408	1.82815	1.33782	1.1887	1.43014	1.3913	1.04494	1.33037	1.20702
4.4937e-14	-1.29124	0.198	0.332	1.5142e-09	cTEC	Kansl3	-8.81982	0.247637	0.233809	0.283163	0.177066	0.179353	1.23326	1.55394	0.692997	0.497758	0.530516	0.830508	0.339286	0.30038	0.377193	0.38806	0.130435	1.11951	1.14207	1.20592	1.09694	1.21604	1.28445	1.43879	1.37422	1.43291	1.25604	1.2845	1.21847	1.269	1.13934	1.19362	1.16899
4.36102e-14	-1.06865	0.565	0.515	1.46949e-09	cTEC	Hmgb2	-8.83283	1.50473	1.1416	1.18878	1.40809	0.453853	37.8605	2.78635	1.58713	0.600897	1.11737	4.61017	1.46429	6.59316	0.552632	0.58209	0.173913	1.54117	1.55282	1.68669	1.6095	1.43328	3.85037	1.68989	1.69764	1.4883	1.47636	2.07406	1.70086	2.76915	1.13303	1.36405	1.30178
3.87223e-14	-1.01408	0.442	0.465	1.30479e-09	cTEC	Cpeb4	-8.88446	0.761815	0.451153	0.622449	0.598651	0.382969	1.96875	3.04478	2.79967	1.08969	3.28638	2.32203	3.46429	0.574144	0.491228	0.567164	0.391304	1.3598	1.24446	1.40745	1.30937	1.42609	1.45315	1.90605	2.14928	1.72356	2.1141	1.6079	2.36922	1.52377	1.17364	1.2773	1.47566
3.79557e-14	-1.16813	0.321	0.371	1.27896e-09	cTEC	Plscr1	-8.89314	0.519849	0.473106	1.24745	0.605396	0.25999	2.24665	4.14712	0.906352	0.506726	0.751174	1.76271	1.11071	0.235741	0.403509	0.597015	0.391304	1.22038	1.24598	1.64514	1.3114	1.24897	1.44859	1.89251	1.40881	1.34751	1.3365	1.51713	1.57275	1.14692	1.11022	1.30745	1.556
3.52196e-14	-1.62382	0.259	0.317	1.18676e-09	cTEC	Serpinb9	-8.92564	0.347826	0.470911	0.214286	0.148398	0.199334	0.896205	1.99915	2.90879	3.47534	1.50704	7.9661	0.221429	0.281369	0.157895	0.41791	0.26087	1.1383	1.23713	1.13403	1.07326	1.16866	1.19676	1.49815	1.97599	2.34451	1.59038	2.74005	1.09982	1.14265	1.04644	1.17972	1.44521
3.20102e-14	-1.19171	0.423	0.446	1.07862e-09	cTEC	Ivns1abp	-8.96713	0.691871	0.420417	0.637755	1.53626	0.729305	1.80804	0.715991	0.712541	0.964126	1.60563	0.966102	8.93929	0.69962	0.824561	0.373134	0.391304	1.3058	1.23277	1.44556	1.75328	1.72722	1.42718	1.23637	1.38374	1.80981	1.69022	1.30157	3.55746	1.51799	1.22113	1.17143	1.50089
1.78224e-14	-1.39683	0.282	0.365	6.00544e-10	cTEC	Malt1	-9.22146	0.406427	0.242591	0.548469	0.278246	0.630114	0.785714	0.984648	1.59121	1.27803	1.49296	0.576271	0.382143	1.13688	0.438596	0.134328	0.0869565	1.21135	1.13579	1.38948	1.17842	1.67637	1.21773	1.35497	1.76299	1.79066	1.60395	1.1976	1.20826	1.57328	1.18743	1.07804	1.13938
1.69012e-14	-1.03436	0.442	0.462	5.69502e-10	cTEC	Adgrl2	-9.2445	0.827977	1.39407	1.39286	0.539629	1.38392	1.10491	0.521962	1.42345	0.744395	1.24413	1.01695	1.23929	0.106464	1.34211	0.402985	1	1.42211	1.6889	1.82013	1.31671	2.17887	1.29803	1.20585	1.75921	1.65892	1.58304	1.33917	1.64771	1.09947	1.44644	1.34917	2.02847
1.68048e-14	-1.25243	0.325	0.385	5.66256e-10	cTEC	Srgap2	-9.24699	0.603025	1.07025	1.21939	1.71838	0.656755	0.952009	0.371429	0.783388	0.399103	2.81221	1.0678	0.921429	0.623574	0.842105	1.23881	1.26087	1.25636	1.57169	1.71991	1.74544	1.73071	1.28372	1.17198	1.48558	1.37677	2.05678	1.31925	1.59743	1.45522	1.25807	1.64349	2.26901
1.43892e-14	-1.25271	0.338	0.409	4.84858e-10	cTEC	Ano6	-9.31439	0.536862	0.596048	1.28061	0.824621	0.653901	0.890625	0.682729	0.658795	0.70852	1.38028	1.01695	5.34286	1.29658	0.736842	1.62687	0.478261	1.2706	1.35396	1.789	1.43664	1.69663	1.23337	1.24655	1.3995	1.62974	1.57528	1.3389	3.02873	2.13997	1.26422	1.60164	1.51732
1.38941e-14	-1.14004	0.357	0.378	4.68175e-10	cTEC	Plce1	-9.32959	0.672968	0.456641	0.484694	1.03879	1.47764	1.03683	0.715991	0.197883	0.789238	0.0704225	0.305085	0.203571	0.0380228	0.0263158	1.97015	0	1.36827	1.24425	1.33195	1.56267	2.27563	1.32086	1.27353	1.13493	1.64438	1.03874	1.10656	1.05397	1.03849	1.00518	2.13524	1
1.184e-14	-1.16805	0.316	0.385	3.98961e-10	cTEC	Tec	-9.39907	0.485822	0.169045	0.196429	0.362563	0.168887	2.5625	2.49979	1.85749	1.64574	1.41784	0.898305	1.21786	0.524715	0.175439	0.19403	0.0434783	1.21655	1.08965	1.16636	1.18573	1.1944	1.54401	1.70379	1.84246	2.15982	1.57471	1.30542	1.71074	1.41163	1.0681	1.09668	1.07333
1.15487e-14	-2.24007	0.185	0.274	3.89144e-10	cTEC	Xkr4	-9.40989	0.480151	1.24259	1.75765	0.659359	0.328259	1.34933	5.19232	3.07573	0.70852	4.32394	0.0338983	1.44286	0.0532319	0.412281	0.731343	0	1.18847	1.61839	1.82577	1.29584	1.38495	1.33139	2.26804	2.10378	1.47322	2.40739	1.01306	1.73051	1.02754	1.1894	1.64957	1
1.12922e-14	-1.3345	0.278	0.406	3.80501e-10	cTEC	Fmn1	-9.41964	0.461248	0.244786	1.47449	0.473862	0.741675	1.01897	1.27463	1.32573	1.22422	1.51643	3.72881	2.10357	0.0798479	0.526316	0.358209	0	1.26681	1.16631	1.81923	1.29595	1.77834	1.2652	1.43602	1.68658	1.93532	1.67431	1.95593	2.17105	1.06439	1.16705	1.14276	1
1.09182e-14	-1.28583	0.11	0.251	3.67901e-10	cTEC	Gm10851	-9.43427	0.215501	0.01427	0.0255102	0.0236088	0.265937	1.16741	1.46695	0.710912	1.0852	0.0610329	0.0508475	0.0178571	0.148289	0.0438596	0.0149254	0	1.12011	1.00999	1.02719	1.02537	1.29347	1.26673	1.41863	1.39331	1.80719	1.02531	1.0183	1.00567	1.12369	1.01615	1.007	1
1.06423e-14	-1.57481	0.119	0.256	3.58603e-10	cTEC	Rgs20	-9.44539	0.243856	0.100988	0.0790816	0.128162	0.0813511	2.46429	2.58977	1.11971	0.470852	0.671362	0.0338983	0.514286	0.0342205	0.0526316	0.0298507	0	1.12475	1.05112	1.06067	1.07228	1.10105	1.53138	1.74664	1.58076	1.43845	1.31509	1.01112	1.39141	1.04013	1.01501	1.01489	1
9.70699e-15	-1.50038	0.208	0.336	3.27087e-10	cTEC	Psd3	-9.48534	0.321361	0.411636	1.01276	0.67285	0.321361	0.878348	1.50917	0.959283	0.340807	3.57277	1	4.55714	0.387833	0.640351	2.95522	0.217391	1.18857	1.23962	1.59431	1.38612	1.38655	1.24656	1.46909	1.4957	1.29009	2.28834	1.32662	2.87919	1.3138	1.21013	2.1117	1.33008
9.47868e-15	-1.34578	0.321	0.376	3.19393e-10	cTEC	Gramd3	-9.49567	0.466919	0.620198	1.74235	0.389545	0.408183	1.1317	1.15522	1.27769	1.61883	6.51174	2.47458	0.457143	1.27757	0.315789	0.223881	0	1.21527	1.33133	1.90245	1.20449	1.41778	1.27242	1.37689	1.6283	2.06198	2.81414	1.68341	1.21389	2.21809	1.12338	1.12121	1
8.55802e-15	-1.64885	0.248	0.33	2.88371e-10	cTEC	Septin1	-9.54005	0.31758	0.236004	0.201531	0.212479	0.259039	0.774554	1.30618	1.72801	4.16143	0.413146	0.457627	0.467857	2.28137	0.131579	0.0895522	0.0434783	1.14454	1.13243	1.1693	1.11372	1.30424	1.18723	1.37217	1.74084	2.78069	1.20088	1.16797	1.326	2.47133	1.05543	1.04381	1.05202
8.22866e-15	-1.27759	0.284	0.368	2.77273e-10	cTEC	Stk4	-9.55709	0.400756	0.387486	0.30102	0.291737	0.230495	2.28237	1.50832	0.526873	0.865471	0.901408	0.474576	0.992857	1.46008	0.385965	0.223881	0.0869565	1.15266	1.21056	1.22076	1.14545	1.26711	1.47114	1.41984	1.28484	1.67259	1.4224	1.15545	1.58242	2.13812	1.14581	1.19013	1.13176
8.06881e-15	-1.42045	0.244	0.285	2.71886e-10	cTEC	Col6a1	-9.56561	0.431002	0.714599	0.265306	0.801012	1.39248	0.390625	0.18806	0.0594463	0.0134529	0.028169	0.135593	0.0321429	0.026616	0.0263158	10.6119	0	1.23021	1.38127	1.17639	1.49689	2.04365	1.1294	1.05564	1.04362	1.01395	1.03551	1.07389	1.03017	1.03032	1.00619	3.14703	1
7.43459e-15	-2.08174	0.142	0.259	2.50516e-10	cTEC	Rdh10	-9.60116	0.166352	0.177827	1.74745	2.86172	0.292103	0.772321	0.924094	0.397394	0.170404	0.300469	0.152542	0.121429	0.0646388	0.0877193	0.447761	0.0434783	1.082	1.09572	1.83389	2.0423	1.33859	1.19129	1.26153	1.20373	1.13649	1.13332	1.05484	1.06741	1.06151	1.03771	1.17242	1.02566
6.49134e-15	-1.47256	0.234	0.308	2.18732e-10	cTEC	Slc4a7	-9.66009	0.340265	0.290889	0.959184	0.590219	0.716223	0.436384	0.342004	0.37785	0.565022	0.995305	1.30508	1.61786	0.661597	0.342105	0.447761	0.0869565	1.18088	1.16678	1.63459	1.28782	1.73863	1.11818	1.12947	1.27596	1.52382	1.40506	1.42295	1.91593	1.55937	1.12741	1.21874	1.1211
5.2445e-15	-1.01065	0.321	0.236	1.76719e-10	cTEC	Slc12a2	-9.75272	0.568998	0.765093	5.89286	0.549747	0.390343	0.40067	0.286567	0.516287	0.183857	0.699531	41.9661	0.717857	0.0608365	0.192982	0.313433	0.217391	1.24022	1.35934	2.97481	1.25846	1.42734	1.114	1.10581	1.28142	1.14444	1.35678	4.5659	1.38974	1.06356	1.06199	1.24965	1.29956
4.22335e-15	-1.12867	0.217	0.379	1.4231e-10	cTEC	Extl1	-9.84677	0.310019	0.0175631	0.127551	0.0944351	0.441722	1.72991	1.46311	1.02769	0.96861	0.591549	0.389831	0.292857	0.0456274	0.0350877	0.164179	0	1.19649	1.00935	1.09656	1.0743	1.50041	1.40725	1.44911	1.54489	1.79433	1.29525	1.16958	1.19744	1.0418	1.00833	1.07193	1
3.44376e-15	-1.48202	0.214	0.312	1.16041e-10	cTEC	Fam89a	-9.93539	0.463138	0.0472009	0.0433673	0.0438449	0.0927688	4.86719	5.83028	3.04235	0.188341	0.521127	0.0677966	0.178571	0.0532319	0.0263158	0.268657	0.0869565	1.20457	1.02396	1.04233	1.02198	1.08421	1.82809	2.12108	1.98473	1.13227	1.25559	1.03792	1.09748	1.05403	1.00553	1.36609	1.11702
2.54684e-15	-1.58152	0.352	0.456	8.58184e-11	cTEC	Tex14	-10.0664	1.23629	0.336992	0.732143	0.56661	2.92602	3.9096	4.95778	3.14169	1.40359	0.469484	0.711864	2.31786	0.501901	0.587719	0.119403	0.26087	1.6557	1.20127	1.57626	1.31987	3.00516	1.92588	2.21994	2.56642	2.17644	1.30671	1.22202	2.3528	1.40069	1.23111	1.12944	1.24267
2.16223e-15	-1.46399	0.25	0.355	7.28585e-11	cTEC	Tanc2	-10.1375	0.47259	1.53568	2.20663	0.826307	0.794006	0.550223	0.727079	0.708469	0.116592	7.20188	5.42373	2.925	0.262357	8.05263	0.850746	0.304348	1.27172	1.76947	2.08306	1.44601	1.80048	1.14488	1.29928	1.41098	1.08475	2.83336	2.27727	2.17556	1.28277	2.61074	1.61712	1.37848
1.91613e-15	-1.39169	0.187	0.336	6.4566e-11	cTEC	Atp9a	-10.19	0.234405	0.254665	0.451531	0.41484	0.236679	1.04688	1.28358	0.605863	0.358744	1.03286	1	0.810714	0.0494297	0.421053	0.58209	0.130435	1.11918	1.14237	1.30617	1.24019	1.27218	1.24938	1.39346	1.32625	1.32211	1.47789	1.33008	1.50363	1.05104	1.11956	1.383	1.17938
1.55193e-15	-1.62919	0.125	0.27	5.22939e-11	cTEC	Fabp4	-10.2815	2.56144	0.343578	0.130102	0.242833	0.142959	2.16183	19.1386	20.5725	19.1839	1.56808	1.0339	0.957143	0.0912548	0.0964912	28.3582	133.391	1.74602	1.18564	1.10994	1.12619	1.19939	1.43635	3.28459	3.88785	4.39448	1.55647	1.2061	1.61515	1.10738	1.03805	4.21424	8.34834
1.16055e-15	-1.09715	0.471	0.544	3.91059e-11	cTEC	Plekhg1	-10.4078	0.979206	0.79034	1.27041	0.44688	1.14343	3.35603	1.90107	2.46661	6.67265	1.26291	0.830508	0.678571	0.0646388	0.526316	1.40299	1.04348	1.48593	1.42663	1.79282	1.26568	2.06098	1.74161	1.65497	2.1394	3.57882	1.61642	1.29745	1.44706	1.04102	1.15168	1.74612	2.05669
8.86684e-16	-1.1143	0.594	0.628	2.98777e-11	cTEC	ENSMUSG00000095041	-10.5247	1.36673	1.10977	1.51531	1.28836	0.955043	2.84263	2.08273	4.91531	5.7713	9.07512	2.91525	4.71786	0.596958	1.94737	0.552239	0.217391	1.5737	1.51293	1.85388	1.60591	1.94285	1.65455	1.63836	2.82962	3.48352	3.16652	1.76766	2.7788	1.47326	1.50904	1.30292	1.32437
8.10001e-16	-1.10998	0.539	0.621	2.72938e-11	cTEC	Neat1	-10.5639	1.52552	0.933041	4.02041	1.76054	1.18625	1.35714	3.2597	7.84528	5.95067	3.66197	6.05085	6.34643	0.847909	0.947368	1.0597	0.521739	1.71652	1.4528	2.56239	1.71731	2.11819	1.38923	1.97632	3.27036	3.54619	2.2173	2.30043	3.26827	1.75993	1.32278	1.57127	1.63252
7.90298e-16	-1.00003	0.425	0.533	2.66299e-11	cTEC	Pde4dip	-10.5746	0.786389	0.397366	0.336735	0.303541	0.809229	3.10491	2.9838	2.193	2.65919	1.60094	0.559322	2.59643	0.243346	0.780702	0.492537	0.130435	1.41531	1.2358	1.23081	1.19211	1.76558	1.68008	1.8404	1.99979	2.54368	1.70879	1.21003	2.24218	1.15885	1.25181	1.26168	1.23877
6.28067e-16	-1.23301	0.265	0.406	2.11634e-11	cTEC	Mfhas1	-10.6744	0.413989	0.229418	0.492347	0.438449	0.287108	3.04018	3.21066	1.2158	1.52018	1.25822	1.47458	0.435714	0.418251	0.210526	0.343284	0.434783	1.23382	1.13952	1.29098	1.25804	1.32154	1.61685	1.87058	1.58451	2.06085	1.56924	1.45549	1.2579	1.39267	1.06605	1.17686	1.6169
6.22895e-16	-1.22613	0.181	0.345	2.09891e-11	cTEC	Pmepa1	-10.678	0.410208	0.329308	0.97449	0.322091	0.714558	1.14062	0.893817	0.952769	0.29148	0.267606	0.457627	0.142857	1.07985	0.0614035	4.61194	0.304348	1.20899	1.18349	1.53765	1.20799	1.64148	1.2688	1.26722	1.49068	1.24946	1.14045	1.17332	1.08582	1.76923	1.02055	2.6684	1.36716
6.1065e-16	-1.40542	0.14	0.292	2.05764e-11	cTEC	Hs3st3b1	-10.6866	0.224953	0.01427	0.0204082	0.0539629	0.287583	2.89509	1.6064	0.527687	0.70852	0.732394	0.20339	0.375	0.095057	0.0350877	0.0746269	0	1.13038	1.0092	1.02184	1.04111	1.3267	1.61216	1.47599	1.28427	1.57391	1.36392	1.09904	1.21272	1.06214	1.00984	1.04515	1
5.97537e-16	-1.1713	0.355	0.472	2.01346e-11	cTEC	Sbno2	-10.6961	0.512287	0.275521	0.826531	0.593592	0.910799	1.05804	0.884435	1.10261	1.37668	1.12207	1.16949	1.40714	0.334601	0.342105	0.522388	0.130435	1.31602	1.17618	1.57859	1.32872	1.94729	1.30105	1.32596	1.66025	2.09241	1.49519	1.36175	1.83185	1.28471	1.11327	1.27605	1.12434
5.65415e-16	-1.9214	0.125	0.252	1.90522e-11	cTEC	Slfn2	-10.7201	0.185255	0.40944	0.882653	0.404722	0.379163	0.710938	0.380384	0.600163	0.434978	0.173709	0.355932	0.0785714	1.08365	0.245614	0.492537	0.130435	1.08	1.23673	1.54346	1.24986	1.36561	1.18663	1.11741	1.31059	1.35607	1.10213	1.14748	1.05354	1.80418	1.06388	1.19748	1.14687
3.94555e-16	-1.73162	0.212	0.329	1.32949e-11	cTEC	Lxn	-10.8763	0.268431	0.339188	0.244898	0.384486	0.17745	2.37723	3.67249	0.995114	0.798206	0.441315	0.355932	0.214286	0.239544	0.289474	0.492537	0.217391	1.11965	1.17635	1.15752	1.20534	1.14276	1.46932	1.81525	1.41449	1.42997	1.20216	1.1233	1.09469	1.21882	1.07395	1.25215	1.37295
2.60756e-16	-1.36571	0.106	0.254	8.78642e-12	cTEC	Inf2	-11.0562	0.151229	0.0493963	0.0510204	0.0657673	0.0853949	1.57031	1.46098	0.574104	0.246637	0.0469484	0.152542	0.0464286	0.0722433	0	0.373134	0.173913	1.08332	1.03059	1.03755	1.03961	1.11381	1.3587	1.4348	1.3016	1.22463	1.02252	1.05058	1.04739	1.0586	1	1.26753	1.34942
1.41223e-16	-1.73311	0.202	0.337	4.75864e-12	cTEC	Man1a	-11.3225	0.402647	0.50494	0.905612	0.268128	0.923406	0.944196	0.504051	0.35342	0.524664	3.23005	0.322034	3.59643	3.57414	0.0701754	3.76119	0.434783	1.20964	1.26164	1.50346	1.16013	1.85648	1.26485	1.19283	1.22851	1.44875	2.21341	1.09519	2.45376	2.82323	1.03214	2.28325	1.47376
1.30169e-16	-2.75124	0.168	0.29	4.38616e-12	cTEC	1600010M07Rik	-11.3579	0.274102	0.294182	0.316327	0.41484	0.842769	5.44308	3.78166	0.727199	0.269058	0.370892	0.474576	0.271429	0.273764	0.421053	0.402985	0.217391	1.1217	1.16541	1.24715	1.22272	1.79487	1.98547	1.96269	1.41621	1.28446	1.19773	1.19021	1.15776	1.21877	1.12721	1.13831	1.35193
1.28867e-16	-1.4902	0.233	0.379	4.34229e-12	cTEC	Nlrc5	-11.3623	0.357278	0.186608	0.663265	0.3086	0.740485	0.821429	0.738166	0.97557	0.627803	0.633803	0.288136	0.310714	0.441065	0.122807	0.134328	0.130435	1.20025	1.12255	1.46241	1.20428	1.79955	1.25475	1.26996	1.59308	1.54319	1.33681	1.0982	1.17358	1.24095	1.03657	1.13232	1.22303
1.26747e-16	-1.15491	0.412	0.524	4.27088e-12	cTEC	Rnf19a	-11.3695	0.769376	0.637761	0.905612	0.699831	1.07398	1.8817	1.89041	1.7044	1.55605	1.17371	1	0.789286	0.498099	0.298246	0.671642	0.217391	1.37051	1.33927	1.62393	1.37355	1.97206	1.43617	1.60498	1.82864	2.02191	1.52084	1.31832	1.45974	1.44351	1.08044	1.30808	1.19496
1.23062e-16	-1.60397	0.17	0.31	4.1467e-12	cTEC	Cxadr	-11.3823	0.253308	0.328211	1.48469	0.625632	0.597288	0.633929	0.285288	0.608306	0.946188	1.21596	5.18644	0.557143	0.0722433	0.850877	0.0298507	0	1.13606	1.19499	1.81581	1.29355	1.5617	1.17128	1.09916	1.34835	1.72403	1.4722	2.22328	1.25634	1.09713	1.28108	1.0113	1
1.19828e-16	-1.07295	0.635	0.665	4.03773e-12	cTEC	Pard3b	-11.3939	2.08696	1.80241	3.02296	1.41653	1.7048	5.21652	4.45288	6.75896	18.4888	7.37089	2.25424	1.70714	0.228137	3.55263	3.97015	0.695652	1.86833	1.85967	2.41919	1.72233	2.36728	2.10371	2.25436	3.05853	4.77665	2.92887	1.68926	1.80613	1.13634	2.02687	2.36468	1.79163
8.6842e-17	-1.03481	0.474	0.578	2.92623e-12	cTEC	Chka	-11.5337	1.65595	0.79034	2.38265	1.28331	1.81803	7.51897	6.46908	3.66612	4.42601	11.2582	5.74576	2.12857	1.67681	3.94737	0.223881	0.478261	1.83532	1.43555	2.12259	1.63979	2.49956	2.39258	2.52204	2.39187	3.0754	3.37031	2.20004	2.06726	1.97554	1.91425	1.21489	1.4669
7.04091e-17	-1.59421	0.227	0.306	2.37251e-12	cTEC	Serpinb6b	-11.6248	0.347826	0.49506	0.221939	0.0775717	0.30019	1.04464	3.34371	1.67671	1.98206	0.652582	7.45763	0.382143	0.555133	0.0438596	0.0597015	0	1.14233	1.25476	1.14468	1.0388	1.21165	1.21533	1.74389	1.64081	1.80999	1.26686	2.56806	1.12222	1.32124	1.01097	1.03108	1
6.84166e-17	-1.06568	0.28	0.358	2.30536e-12	cTEC	Ciao2a	-11.6373	0.362949	0.294182	0.341837	0.507589	0.145576	2.88504	1.98891	0.720684	0.547085	0.755869	1.30508	0.739286	0.749049	0.850877	0.38806	0.304348	1.14057	1.14911	1.19726	1.24328	1.12419	1.52791	1.46828	1.3139	1.30663	1.30095	1.38114	1.28942	1.44638	1.22688	1.19465	1.48395
6.3901e-17	-1.00559	0.38	0.459	2.15321e-12	cTEC	Far1	-11.6669	0.657845	0.479693	0.711735	0.6914	0.313749	3.33147	3.41194	1.16124	1.73094	1.09859	1.71186	1.06071	0.547529	1.13158	0.850746	0.26087	1.28874	1.26399	1.45548	1.32828	1.34058	1.65742	1.85463	1.5437	2.17389	1.46836	1.52671	1.61424	1.46331	1.38912	1.45584	1.32863
5.66136e-17	-1.8854	0.149	0.288	1.90765e-12	cTEC	Adcy2	-11.7195	0.36862	0.0241493	0.872449	1.63069	1.65509	0.417411	0.249041	0.349349	0.116592	6.1831	0.152542	0.732143	0.0152091	0.0701754	0.0597015	0	1.26932	1.02012	1.52475	1.86095	2.4329	1.14257	1.12757	1.27205	1.11911	2.75569	1.05512	1.36796	1.02302	1.01522	1.04697	1
5.3392e-17	-1.43343	0.327	0.413	1.7991e-12	cTEC	Dennd4a	-11.7449	0.620038	0.390779	0.237245	0.268128	0.194814	2.85938	5.10576	2.28583	1.33632	3.94366	0.847458	0.664286	3.92776	0.482456	0.537313	0.173913	1.28919	1.2118	1.17361	1.1288	1.24524	1.60035	2.24851	1.96558	1.98901	2.23097	1.25487	1.36614	2.69902	1.14161	1.32758	1.21552
5.18364e-17	-1.3747	0.225	0.394	1.74668e-12	cTEC	Calcrl	-11.7578	0.459357	0.211855	0.15051	0.271501	0.796384	3.00112	3.32537	1.43404	0.2287	0.530516	0.237288	0.703571	0.520913	0.0263158	2.37313	0.869565	1.27675	1.10889	1.12182	1.21039	1.69336	1.62301	1.92013	1.69943	1.25836	1.27198	1.1031	1.43257	1.48017	1.01704	1.85802	1.88972
4.20874e-17	-1.43547	0.189	0.347	1.41818e-12	cTEC	Mink1	-11.8483	0.224953	0.2382	0.395408	0.192243	0.223359	1.03906	1.39275	0.846091	0.829596	0.652582	0.457627	0.428571	0.258555	0.192982	0.104478	0.0869565	1.12518	1.1415	1.2816	1.11084	1.27055	1.26866	1.43208	1.49188	1.73762	1.33834	1.15641	1.284	1.23809	1.07099	1.07996	1.11226
3.80235e-17	-1.70196	0.24	0.364	1.28124e-12	cTEC	Rab11fip1	-11.8924	0.330813	0.132821	0.994898	0.340641	0.184824	1.44643	2.23028	2.29072	1.13901	2.44131	1.25424	0.885714	0.342205	0.614035	0.223881	0	1.16056	1.07926	1.58699	1.16545	1.22937	1.34831	1.67401	2.02335	1.82454	2.02005	1.41053	1.54143	1.23196	1.16597	1.15764	1
3.59949e-17	-1.37406	0.348	0.457	1.21288e-12	cTEC	Slc9a1	-11.9162	0.52741	0.413831	0.693878	0.300169	0.71099	1.92746	1.76247	1.2785	1.63229	0.849765	1.15254	0.389286	0.26616	0.254386	0.701493	0.173913	1.2612	1.2334	1.47001	1.17924	1.76252	1.49369	1.57534	1.71813	2.06656	1.41837	1.35694	1.32217	1.24235	1.08834	1.30762	1.37424
3.54357e-17	-1.26581	0.386	0.473	1.19404e-12	cTEC	Tbc1d8	-11.923	0.57656	0.403952	0.464286	0.29511	0.563511	1.66071	2.84648	1.50651	1.41256	1.47887	0.694915	1.025	0.43346	0.280702	0.0746269	0.0869565	1.28436	1.24698	1.33472	1.17113	1.61021	1.43394	1.86023	1.74757	2.07928	1.64644	1.22415	1.61133	1.28563	1.07196	1.05204	1.07697
3.37015e-17	-1.76619	0.106	0.253	1.1356e-12	cTEC	Axl	-11.9448	0.136106	0.30955	0.160714	0.0910624	0.205519	1.20424	0.87548	0.299674	0.0179372	0.0234742	0.0508475	0.0178571	0.0988593	0.00877193	2.34328	0	1.05972	1.18985	1.14532	1.05525	1.21773	1.27338	1.2561	1.16279	1.02116	1.00718	1.03293	1.01179	1.03692	1.00238	1.84802	1
2.5476e-17	-1.07879	0.236	0.416	8.5844e-13	cTEC	Fgd5	-12.0663	0.453686	0.0153677	0.0510204	0.0269815	0.427688	3.29464	3.16674	1.76792	0.860987	0.953052	0.0338983	0.407143	0.0494297	0.0175439	0.462687	0.73913	1.28747	1.00862	1.04138	1.02452	1.4977	1.71787	1.86286	1.83406	1.68556	1.44301	1.01876	1.28325	1.03669	1.00401	1.18754	1.7801
2.45072e-17	-1.80473	0.159	0.307	8.25793e-13	cTEC	Rassf6	-12.0831	0.196597	0.117453	0.242347	0.107926	0.205756	1.71875	1.43667	0.786645	1.98655	0.915493	1.71186	4.81786	0.0684411	0.105263	0.0149254	0	1.11659	1.0643	1.18199	1.05267	1.24784	1.39344	1.43414	1.44753	2.0403	1.39595	1.45112	2.82675	1.07302	1.0548	1.01393	1
1.78095e-17	-1.4664	0.295	0.406	6.0011e-13	cTEC	Epb41l2	-12.2218	0.455577	0.535675	0.617347	0.537943	0.960514	1.04353	0.759488	0.292345	0.210762	0.197183	0.576271	0.710714	0.73384	0.263158	2.67164	0.434783	1.22065	1.298	1.43366	1.30844	1.92473	1.27907	1.24972	1.19446	1.1702	1.08365	1.17231	1.44072	1.51786	1.08741	2.02797	1.50323
9.44043e-18	-2.025	0.24	0.338	3.18105e-13	cTEC	Stmn1	-12.4974	0.500945	0.589462	0.372449	1.2344	0.448382	24.5569	1.82217	0.394137	0.152466	0.544601	3.0678	2.95714	4.61977	0.578947	0.641791	0.304348	1.19722	1.29382	1.26296	1.5162	1.33482	3.32173	1.43125	1.21298	1.14991	1.25716	1.61168	1.68703	2.59131	1.15663	1.57578	1.52544
9.15646e-18	-1.35588	0.465	0.51	3.08536e-13	cTEC	Sat1	-12.5107	1.25142	1.8551	3.77551	5.96965	0.444814	1.68192	5.41109	5.66042	1.32287	2.94836	3.13559	0.846429	1.56274	1.35088	3.25373	1.47826	1.46069	1.75694	2.52547	2.8013	1.47988	1.39471	2.14152	2.71228	1.94608	2.06276	1.79037	1.43672	1.75324	1.53713	2.63162	2.53892
7.58075e-18	-1.96922	0.163	0.324	2.55441e-13	cTEC	Robo2	-12.5927	0.47259	0.0548847	1.05612	0.0489039	2.10276	0.887277	1.40896	0.984528	0.452915	2.48826	0.135593	3.8	0.0190114	0.0701754	0.567164	0.304348	1.29543	1.03604	1.65429	1.03719	2.50905	1.26092	1.47855	1.56969	1.30365	1.96709	1.07069	2.57587	1.01959	1.01498	1.19754	1.30417
6.04029e-18	-1.55326	0.172	0.33	2.03534e-13	cTEC	Gramd4	-12.6914	0.20794	0.0889133	0.170918	0.200675	0.149144	1.45536	1.59147	1.28664	0.856502	0.596244	0.305085	0.332143	0.231939	0.0614035	0.179104	0.130435	1.11563	1.05342	1.13837	1.11781	1.19227	1.33976	1.50359	1.6329	1.76048	1.29146	1.11017	1.26867	1.15212	1.03862	1.139	1.22928
5.76575e-18	-1.17693	0.473	0.529	1.94283e-13	cTEC	Fam13b	-12.7116	0.852552	0.714599	0.630102	0.537943	0.914367	4.87277	2.96972	1.32085	3.49776	1.21596	0.983051	1.11786	0.707224	0.868421	0.567164	0.173913	1.39093	1.38524	1.41055	1.28069	1.85334	1.93414	1.83761	1.7015	2.74046	1.57244	1.28857	1.6512	1.58875	1.3214	1.30032	1.21989
5.74361e-18	-1.55731	0.236	0.383	1.93537e-13	cTEC	Bcl2l1	-12.7132	0.342155	0.434687	0.94898	0.296796	0.233587	1.07366	2.01834	2.04805	0.497758	0.779343	1.9661	0.5	0.730038	0.219298	0.507463	0.478261	1.15885	1.25765	1.60292	1.15406	1.26398	1.2539	1.59161	1.86595	1.35556	1.38	1.53996	1.251	1.72138	1.05872	1.37615	1.64041
5.67017e-18	-1.75539	0.112	0.264	1.91062e-13	cTEC	Ptges	-12.7188	0.168242	0.297475	0.52551	0.165261	0.18411	0.731027	1.09467	0.77443	0.363229	0.389671	0.372881	0.217857	0.0228137	0.0175439	0.820896	0	1.07196	1.18174	1.33524	1.12081	1.18174	1.16828	1.32671	1.37968	1.32237	1.21719	1.15321	1.18909	1.01964	1.00402	1.35732	1
4.06548e-18	-2.06459	0.115	0.263	1.36991e-13	cTEC	Prkd1	-12.8633	0.179584	0.407245	0.744898	0.195616	0.2255	1.18304	1.94115	0.394137	0.29148	0.474178	0.79661	0.35	0.0114068	0.210526	0.626866	1.34783	1.0881	1.2603	1.44959	1.14065	1.25565	1.29229	1.65832	1.23317	1.24439	1.2128	1.24375	1.26118	1.01095	1.05846	1.36473	1.82959
3.72977e-18	-2.32046	0.189	0.33	1.25678e-13	cTEC	Nupr1	-12.9007	0.608696	0.208562	16.0791	2.76054	0.319933	0.733259	6.17569	6.64332	0.116592	6.53052	51.4407	0.0928571	0.102662	1.02632	8.92537	0.0434783	1.28477	1.14144	4.06305	2.07698	1.34606	1.1647	2.22494	2.91068	1.10221	2.72303	4.81664	1.05036	1.07506	1.22867	2.97541	1.05377
3.56431e-18	-1.72555	0.112	0.269	1.20103e-13	cTEC	Serinc2	-12.9204	0.145558	0.0768386	0.446429	0.172007	0.330162	1.26339	0.627292	0.361564	0.112108	0.624413	1.52542	0.646429	0.0152091	0.377193	0.0447761	0	1.07205	1.04828	1.2609	1.08852	1.32157	1.28047	1.18185	1.1914	1.11583	1.29592	1.46056	1.26419	1.02494	1.10152	1.01834	1
2.88688e-18	-1.80128	0.189	0.323	9.72762e-14	cTEC	Vps37b	-13.012	0.224953	0.178924	0.380102	0.532884	0.231684	0.945312	1.05373	0.827362	0.67713	0.699531	1.76271	0.725	1.52091	0.0964912	0.268657	0	1.09954	1.10597	1.24723	1.2637	1.27786	1.2265	1.31854	1.45607	1.61698	1.31932	1.50103	1.46332	2.15713	1.02649	1.1625	1
2.83982e-18	-1.64879	0.474	0.558	9.56906e-14	cTEC	Gclc	-13.0191	1.44612	2.27991	3.35204	4.13828	3.06422	3.52232	2.82601	2.19381	4.33632	1.16432	4.89831	2.33929	0.798479	0.77193	0.492537	0.304348	1.63067	1.94636	2.53159	2.37894	2.99542	1.83236	1.83089	2.0911	3.01685	1.47282	2.15299	2.14683	1.53436	1.22197	1.27988	1.41712
2.73252e-18	-1.83134	0.189	0.334	9.2075e-14	cTEC	Sema6d	-13.0359	0.26276	0.631175	0.377551	0.202361	0.656755	1.74107	0.945842	0.390065	0.121076	0.399061	0.169492	0.207143	0.125475	0.0350877	0.537313	0.347826	1.1369	1.36263	1.27733	1.10015	1.70219	1.41824	1.32053	1.22979	1.09455	1.19942	1.05451	1.08444	1.07125	1.01195	1.36604	1.29189
2.38956e-18	-1.48784	0.221	0.376	8.05185e-14	cTEC	Rapgef1	-13.0941	0.302457	0.312843	0.364796	0.193929	0.268554	2.02344	1.84563	0.922638	0.520179	0.802817	0.610169	0.553571	0.623574	0.263158	0.477612	0.608696	1.15033	1.17692	1.2814	1.1055	1.33106	1.45735	1.56092	1.48728	1.46532	1.3839	1.23556	1.36327	1.53841	1.08098	1.25433	1.73811
1.3468e-18	-1.31528	0.17	0.349	4.53819e-14	cTEC	Pcdh17	-13.3431	0.586011	0.0318332	0.540816	1.24115	1.17341	2.08371	1.96162	1.62296	1.287	2.02817	0.152542	1.84286	0.0456274	0.0350877	0.0746269	1.08696	1.38244	1.02123	1.39012	1.70404	2.11095	1.55242	1.64975	1.92346	1.93207	1.80406	1.04858	2.06471	1.03569	1.00583	1.06748	2.25845
1.20708e-18	-1.17446	0.308	0.466	4.06739e-14	cTEC	Lcp1	-13.3907	0.625709	0.121844	0.497449	0.145025	0.529258	3.875	3.47505	3.58062	3.00897	2.1784	0.220339	2.37857	1.98479	0.0350877	0	0.0869565	1.34529	1.07501	1.31666	1.10452	1.5439	1.75979	1.82778	2.2148	2.41673	1.84158	1.0996	2.05275	1.84372	1.00718	1	1.14021
6.91942e-19	-2.12671	0.102	0.252	2.33157e-14	cTEC	Tsbp1	-13.6324	0.117202	0.151482	0.0612245	0.0489039	0.088725	0.482143	1.37655	1.1987	2.52018	0.600939	0.0169492	0.321429	0.0228137	0.210526	0	0	1.06814	1.10066	1.0435	1.02786	1.12393	1.13237	1.42473	1.62004	2.54891	1.28172	1.01187	1.21293	1.00942	1.07697	1	1
6.44514e-19	-1.6243	0.219	0.355	2.17175e-14	cTEC	Ezh2	-13.6632	0.294896	0.163557	0.288265	0.473862	0.316365	3.39509	1.7339	0.697883	0.206278	0.624413	0.610169	0.525	1.55894	0.201754	0.253731	0.173913	1.14063	1.08958	1.22487	1.25105	1.34977	1.70683	1.50971	1.39193	1.18859	1.27424	1.20542	1.27007	2.00208	1.07084	1.24126	1.22129
3.80805e-19	-1.67718	0.112	0.269	1.28316e-14	cTEC	Cyb561a3	-13.8917	0.128544	0.090011	0.153061	0.155143	0.146051	2.07924	1.04478	0.528502	1.32287	0.29108	0.152542	0.257143	0.281369	0.421053	0.164179	0.0434783	1.06885	1.05363	1.10079	1.09091	1.14253	1.43586	1.28206	1.25557	1.84123	1.13948	1.05614	1.14776	1.19382	1.12614	1.07421	1.05222
3.70356e-19	-1.18192	0.522	0.638	1.24795e-14	cTEC	S100a6	-13.9038	4.08696	8.70252	20.2117	4.4688	5.51118	4.46429	10.6328	21.6173	3.32287	3.93897	31.2373	1.11429	4.0076	0.289474	36.0746	1.86957	2.29356	3.16528	4.44371	2.65552	3.00046	1.89701	2.77556	4.02377	2.57955	2.18768	4.33247	1.55053	2.05327	1.06502	5.04564	2.66889
2.2087e-19	-1.74001	0.193	0.341	7.44244e-15	cTEC	Arsb	-14.1283	0.251418	0.218441	0.234694	0.158516	0.190057	3.4721	2.77015	1.02199	4.08969	0.685446	0.677966	0.396429	0.155894	0.614035	0.358209	0.0869565	1.14543	1.12652	1.18001	1.08302	1.22151	1.66997	1.71867	1.47083	3.00877	1.33576	1.245	1.24405	1.07176	1.20434	1.21011	1.0723
1.87094e-19	-1.16728	0.461	0.501	6.30432e-15	cTEC	Gtf2a1	-14.2004	0.831758	0.513721	0.423469	0.554806	0.937678	3.71652	3.9194	1.42997	1.56502	0.765258	0.813559	1.09643	0.43346	0.719298	0.41791	0.217391	1.40313	1.27384	1.29441	1.26966	1.96027	1.73558	1.92773	1.77608	2.11464	1.37637	1.26552	1.71323	1.30442	1.22614	1.19924	1.38732
1.27825e-19	-1.18632	0.308	0.429	4.30721e-15	cTEC	Npdc1	-14.3658	0.466919	0.653128	0.772959	1.3575	0.385347	2.55692	1.44478	0.595277	0.457399	1.94366	1.91525	1.20357	0.0380228	2.12281	2.46269	0.652174	1.17831	1.3562	1.43236	1.6383	1.31713	1.52439	1.36272	1.28494	1.32279	1.77705	1.57745	1.43998	1.02778	1.49076	2.04455	1.71687
1.15393e-19	-1.94845	0.318	0.46	3.88828e-15	cTEC	Serpinb1a	-14.4102	1.40454	0.310648	0.512755	0.752108	2.74263	2.87723	5.04179	13.1857	55.5471	5.58685	7.32203	0.857143	0.201521	0.245614	0.38806	0.26087	1.5443	1.17119	1.33084	1.35878	2.29635	1.60218	2.06609	3.44296	5.64336	2.48373	2.53463	1.26841	1.15721	1.06825	1.1574	1.36944
1.0441e-19	-2.0592	0.113	0.266	3.51819e-15	cTEC	Smpd3	-14.4537	0.139887	0.403952	0.186224	0.079258	0.316841	0.797991	0.599574	0.562704	0.412556	2.0892	0.135593	1.09643	0.0380228	0.0350877	0.761194	0	1.06927	1.22283	1.1382	1.04457	1.31293	1.21837	1.20278	1.33315	1.38892	1.8253	1.07175	1.62792	1.0189	1.0073	1.47786	1
9.51924e-20	-1.85211	0.102	0.258	3.2076e-15	cTEC	Tmem98	-14.4938	0.117202	0.212953	0.372449	0.222597	0.307564	1.24888	1.07633	0.130293	0	0.126761	0.576271	0.146429	0.00760456	0.640351	0.164179	0	1.05671	1.12461	1.25218	1.13398	1.24029	1.26232	1.27613	1.05975	1	1.07707	1.18596	1.04493	1.00354	1.16874	1.07976	1
9.40647e-20	-1.74676	0.168	0.33	3.1696e-15	cTEC	Mbp	-14.499	0.215501	0.151482	0.683673	0.214165	0.225262	0.824777	1.09638	1.50326	0.874439	2.03286	1.0678	0.453571	0.760456	0.22807	0.880597	0	1.11429	1.09084	1.43052	1.12309	1.27496	1.21387	1.35409	1.7283	1.68809	1.80807	1.34968	1.29993	1.58477	1.05852	1.90572	1
9.02567e-20	-1.04587	0.42	0.477	3.04129e-15	cTEC	Tmpo	-14.5169	0.661626	0.623491	0.558673	0.448567	0.465985	4.87277	3.83539	1.09528	0.201794	0.981221	0.864407	0.646429	0.844106	0.394737	0.537313	0.304348	1.29668	1.33965	1.38221	1.23805	1.47694	1.87897	1.8483	1.50297	1.2225	1.45189	1.25469	1.30254	1.50341	1.10329	1.31601	1.4269
8.98281e-20	-1.13616	0.461	0.308	3.02685e-15	cTEC	Dcn	-14.519	3.46692	43.0494	3.59439	6.74874	1.29876	0.762277	1.72154	0.446254	0.206278	0.253521	19.2712	0.0714286	0.0494297	0.0526316	112.881	0	1.96959	5.16038	2.57254	2.86938	1.76215	1.22533	1.46084	1.20427	1.22288	1.15177	3.67775	1.04124	1.05533	1.02478	6.33006	1
5.58048e-20	-1.68606	0.276	0.423	1.8804e-15	cTEC	H2-M2	-14.7258	0.882798	0.118551	0.0918367	0.0640809	1.33706	5.99888	5.51045	5.49023	13.7175	0.816901	0.271186	0.453571	1.13308	0.0438596	0.0447761	0.0434783	1.37567	1.063	1.07317	1.04289	1.88149	2.0029	2.14053	2.53819	3.91165	1.33928	1.13977	1.14462	1.49	1.0079	1.02928	1.10201
4.28114e-20	-1.19225	0.495	0.543	1.44257e-15	cTEC	Prkca	-14.8409	1.13422	0.50494	1.18112	1.19056	0.501665	2.86161	5.08785	4.09853	2.46188	3.99061	1.40678	3.42143	2.19392	0.780702	1.68657	0	1.47628	1.29951	1.71658	1.572	1.56711	1.64684	2.27539	2.49888	2.49681	2.33805	1.4719	2.40083	2.40332	1.27171	1.86831	1
4.26354e-20	-1.41643	0.405	0.457	1.43664e-15	cTEC	Pde7a	-14.8427	0.705104	2.02964	4.05102	0.455312	1.37036	1.06027	0.540725	0.678339	0.434978	0.657277	0.915254	1.39643	0.768061	0.350877	0.268657	0.0869565	1.33351	1.91298	2.73643	1.22754	2.12679	1.27624	1.22117	1.40628	1.41112	1.30053	1.26341	1.65264	1.62022	1.11231	1.15999	1.12301
2.10093e-20	-1.67252	0.127	0.302	7.07931e-16	cTEC	Socs2	-15.15	0.215501	0.148189	0.941327	1.03035	0.521646	1.07812	0.886994	0.665309	0.493274	1.14554	0.101695	0.296429	0.532319	0.245614	0.791045	0.478261	1.13038	1.08809	1.56881	1.51101	1.52418	1.23886	1.25624	1.35729	1.38958	1.4984	1.02784	1.17772	1.30105	1.07882	1.37386	1.57053
1.55028e-20	-1.00857	0.448	0.531	5.22383e-16	cTEC	Shisa5	-15.282	0.773157	1.26345	1.81888	1.55312	0.719077	1.74777	2.1403	1.45603	0.466368	1.33803	5.71186	0.785714	1.12928	1.79825	2.23881	1.08696	1.30548	1.59293	1.85677	1.73059	1.53352	1.37058	1.54078	1.59018	1.32109	1.53502	2.31753	1.35015	1.75792	1.42732	1.88337	2.19187
1.46065e-20	-1.38985	0.359	0.473	4.92182e-16	cTEC	Rbpj	-15.3079	0.491493	0.40944	0.762755	0.362563	0.478116	1.48438	2.35139	2.17427	3.15247	1.46479	0.813559	0.621429	0.722433	0.45614	1	0.173913	1.25017	1.23482	1.44722	1.20813	1.5232	1.33824	1.67738	2.01259	2.5626	1.58976	1.26518	1.31585	1.44264	1.18194	1.48476	1.24569
1.11107e-20	-2.08161	0.363	0.42	3.74387e-16	cTEC	Fgf21	-15.4267	1.72212	0.170143	0.163265	0.229342	0.928639	31.2299	46.2371	2.42508	3.6861	0.981221	0.40678	1.26786	0.125475	0.114035	0.149254	0.0434783	1.68011	1.10544	1.13063	1.13382	1.62789	3.61214	4.34301	1.86531	2.64414	1.37925	1.15479	1.33509	1.14324	1.04151	1.16022	1.07604
9.06386e-21	-1.33155	0.353	0.536	3.05416e-16	cTEC	Galnt17	-15.5151	1.15879	0.133919	0.183673	0.227656	2.07826	7.21987	3.85757	3.64902	1.02691	2.77465	0.237288	1.55	0.155894	0.0350877	0.910448	0.0869565	1.59505	1.07461	1.16096	1.14124	2.5761	2.29647	2.11503	2.42896	1.62234	2.01695	1.11225	1.76981	1.10393	1.00882	1.62597	1.11085
8.49464e-21	-2.02943	0.163	0.331	2.86235e-16	cTEC	Tmem117	-15.5433	0.268431	0.0669594	0.112245	0.419899	0.481446	1.09152	1.58465	1.03257	5.24664	5.34272	9.27119	0.957143	0.0532319	0.692982	0.0447761	0	1.15681	1.04456	1.09078	1.22105	1.55182	1.30082	1.54384	1.55016	3.34693	2.56143	2.67154	1.54879	1.03358	1.27526	1.06104	1
7.48903e-21	-1.29814	0.357	0.388	2.5235e-16	cTEC	Sephs2	-15.598	0.568998	0.225027	0.216837	0.409781	0.141532	1.73549	3.4209	3.54153	3.01794	1.43662	0.745763	0.653571	0.406844	0.526316	0.179104	0.217391	1.21658	1.12048	1.14336	1.19611	1.14956	1.36564	1.79166	2.12435	2.34373	1.57699	1.27024	1.37322	1.38604	1.13733	1.07831	1.29916
7.11698e-21	-1.31918	0.265	0.431	2.39814e-16	cTEC	Abcc1	-15.6201	0.378072	0.215148	0.589286	0.168634	0.398668	2.32924	2.45117	0.979642	0.605381	1.20188	0.389831	0.439286	0.13308	0.22807	0.358209	0.0869565	1.20462	1.12549	1.41419	1.09504	1.46241	1.52192	1.69031	1.5335	1.50571	1.52107	1.12514	1.30199	1.11726	1.07989	1.21108	1.07867
6.28774e-21	-1.36258	0.255	0.281	2.11872e-16	cTEC	Ddx60	-15.6739	0.406427	0.746432	2.04847	0.413153	0.978354	0.11942	0.204691	0.280945	0.152466	0.286385	0.728814	0.225	0.0684411	0.429825	0.373134	0.173913	1.23255	1.43212	2.11428	1.25081	1.95937	1.04505	1.07872	1.21072	1.13436	1.19213	1.27453	1.14593	1.04737	1.14676	1.21117	1.20989
1.51965e-21	-2.02965	0.102	0.274	5.12061e-17	cTEC	Lingo2	-16.2907	0.36862	0.0515917	0.0994898	0.0185497	1.63844	2.39286	1.60128	0.893322	0.331839	1.07512	0	0.5	0.0456274	0.0263158	0	0	1.24389	1.03657	1.08539	1.02148	2.36241	1.62828	1.5404	1.50006	1.22694	1.61693	1	1.19916	1.04768	1.01059	1	1
1.42648e-21	-1.05205	0.484	0.579	4.80668e-17	cTEC	Dsg2	-16.3182	1.0397	0.551043	0.594388	0.421585	1.21289	5.17857	3.52409	2.29072	2.67265	3	1.28814	2.21429	0.0456274	0.929825	0.0149254	0	1.47331	1.292	1.35494	1.2409	2.00198	1.98081	1.8573	1.94619	2.4487	2.03473	1.4276	2.10261	1.03929	1.26348	1.00776	1
1.25403e-21	-1.27505	0.386	0.528	4.22558e-17	cTEC	Dock9	-16.3741	0.693762	0.474204	0.910714	0.372681	0.715985	3.88728	2.81023	1.78746	2.58296	2.41784	0.983051	0.996429	0.231939	0.736842	0.895522	1.43478	1.34938	1.27514	1.55112	1.21697	1.75681	1.82909	1.82943	1.84498	2.64841	1.96073	1.30616	1.67722	1.25955	1.26844	1.34921	2.46659
1.04174e-21	-2.73355	0.106	0.266	3.51026e-17	cTEC	Dclk1	-16.4547	0.221172	0.105379	4.12755	1.32546	0.798525	0.766741	0.414925	0.355049	0.331839	0.474178	0.440678	20.9071	0.026616	0.280702	4.04478	0	1.16148	1.06389	2.71377	1.72334	1.80913	1.20578	1.17451	1.25225	1.3478	1.20393	1.16622	4.94245	1.02978	1.07629	2.16637	1
1.01858e-21	-2.33767	0.136	0.29	3.43222e-17	cTEC	Slco3a1	-16.4644	0.179584	0.0768386	0.737245	0.298482	0.911513	0.342634	0.482303	0.320033	0.318386	1.37559	0.20339	1.33214	0.692015	7.24561	1.47761	0.130435	1.11733	1.05089	1.47888	1.15939	1.88878	1.11474	1.16561	1.19027	1.26176	1.60433	1.07976	1.6875	1.69027	2.51941	1.66145	1.16646
1.01667e-21	-1.51072	0.302	0.405	3.42578e-17	cTEC	Tmem19	-16.4652	0.417769	0.246981	0.19898	0.274874	0.244767	2.45312	3.08571	2.61156	0.959641	0.56338	0.542373	0.478571	0.281369	0.307018	0.268657	0.0869565	1.17779	1.12881	1.14196	1.14203	1.25718	1.49346	1.74561	1.98243	1.60075	1.27779	1.17658	1.27324	1.23032	1.10642	1.11191	1.07867
8.1674e-22	-2.65446	0.102	0.26	2.75209e-17	cTEC	S100a4	-16.5603	0.120983	0.0625686	0.0663265	0.143339	0.0792103	1.34933	2.75949	1.9886	0.143498	0.0985915	0.186441	0.0714286	4.12928	0.0438596	2.26866	0.304348	1.05819	1.04097	1.06724	1.10082	1.07948	1.29958	1.67149	1.70117	1.16823	1.04483	1.05512	1.0531	2.02413	1.00884	2.39934	1.51439
6.80561e-22	-1.80501	0.1	0.271	2.29322e-17	cTEC	Cep85	-16.6396	0.137996	0.119649	0.183673	0.126476	0.115842	0.978795	1.47505	1.06596	0.533632	0.431925	0.322034	0.460714	0.444867	0.447368	0.0746269	0	1.08	1.06835	1.13826	1.072	1.14162	1.23291	1.43171	1.54713	1.43641	1.18016	1.09141	1.32924	1.4948	1.13136	1.034	1
5.37708e-22	-1.96026	0.149	0.305	1.81186e-17	cTEC	Cpne2	-16.7419	0.200378	0.11416	0.142857	0.158516	0.150571	3.76228	2.53774	1.52362	0.502242	0.276995	0.101695	0.121429	0.212928	0.0350877	0.432836	0.26087	1.09596	1.06679	1.11473	1.08656	1.15656	1.70236	1.60149	1.63643	1.38912	1.12841	1.0327	1.06424	1.12563	1.01659	1.36601	1.35281
5.04881e-22	-2.07717	0.113	0.279	1.70125e-17	cTEC	Arhgap18	-16.7692	0.1569	0.218441	0.331633	0.177066	0.0539962	1.00558	1.75011	0.989414	0.973094	0.807512	3	1.19286	0.288973	0.491228	0.597015	1.21739	1.07465	1.12927	1.21947	1.10521	1.06909	1.2409	1.53459	1.51795	1.79275	1.36074	1.81498	1.69465	1.2452	1.1334	1.26874	2.26271
4.11061e-22	-1.76971	0.178	0.333	1.38511e-17	cTEC	P2rx4	-16.8585	0.234405	0.16685	0.686224	0.195616	0.0642245	1.53013	2.58422	1.29235	0.349776	1.28169	1.23729	0.539286	0.224335	0.5	0.597015	0.0869565	1.09929	1.098	1.37231	1.0979	1.07387	1.352	1.65365	1.55806	1.19869	1.54666	1.41529	1.36116	1.17541	1.13076	1.30518	1.13891
3.3713e-22	-2.43958	0.17	0.307	1.13599e-17	cTEC	Gm43305	-16.9446	0.234405	0.136114	0.173469	0.29511	0.107517	6.01228	5.18294	1.95358	2.21973	0.29108	0.237288	0.214286	0.281369	0.622807	0.0895522	0.0434783	1.11349	1.0773	1.10372	1.1426	1.10564	2.00134	2.08804	1.76054	2.35662	1.10852	1.06851	1.11082	1.22678	1.18144	1.05365	1.05969
2.40868e-22	-1.75474	0.146	0.327	8.11627e-18	cTEC	Esrrg	-17.0906	0.42344	0.0889133	1.51531	0.337268	0.268316	2.22879	2.82985	4.17752	8.68161	5.78873	14.6441	2.04643	0.0760456	18.307	0.0149254	0	1.29676	1.08822	1.71293	1.1776	1.33535	1.5629	1.85161	2.56763	3.78526	2.66035	3.2194	2.01765	1.08752	3.71408	1.00759	1
2.01178e-22	-1.48541	0.2	0.396	6.7789e-18	cTEC	Dapp1	-17.1688	0.328922	0.0757409	0.44898	0.165261	0.390818	1.96317	1.75394	1.87541	1.52915	0.591549	0.694915	0.817857	1.19011	0.114035	0.0895522	0	1.17732	1.04142	1.32525	1.09711	1.41524	1.43231	1.51025	1.82396	1.93842	1.27333	1.23589	1.4665	1.69136	1.03246	1.048	1
1.61377e-22	-1.06549	0.302	0.264	5.43775e-18	cTEC	Samd9l	-17.2646	0.41966	0.73326	1.02041	0.43339	0.495718	0.177455	0.189765	0.229642	0.964126	0.300469	0.542373	0.492857	0.243346	0.245614	0.492537	0.565217	1.17839	1.3922	1.6661	1.24613	1.55033	1.05715	1.07534	1.18222	1.85355	1.15541	1.18665	1.34472	1.24351	1.0859	1.29713	1.65763
1.5576e-22	-1.37139	0.268	0.379	5.2485e-18	cTEC	Stap2	-17.28	0.338374	0.220637	0.397959	0.328836	0.205756	2.54688	2.12751	1.06026	1.10762	0.549296	0.779661	0.335714	0.0608365	0.27193	0.0298507	0.304348	1.13777	1.12382	1.26116	1.17597	1.20789	1.50509	1.52502	1.50696	1.77731	1.2393	1.25594	1.20947	1.05758	1.0897	1.0175	1.46414
1.1542e-22	-1.68837	0.308	0.429	3.88918e-18	cTEC	Srgap1	-17.4101	0.570888	0.428101	1.24235	1.26476	1.31589	0.979911	0.532196	1.36564	1.09417	3.67136	2.66102	1.75	0.0532319	0.0350877	0.746269	0.0869565	1.28865	1.25159	1.70312	1.59898	2.21283	1.27859	1.20207	1.78871	1.86298	2.24912	1.68262	1.80046	1.04701	1.00747	1.59929	1.10594
1.03108e-22	-1.16141	0.323	0.367	3.47432e-18	cTEC	Gnb4	-17.4591	0.570888	0.100988	0.0586735	0.0860034	0.24548	4.82031	5.35011	1.56107	1.35874	0.300469	0.152542	0.15	0.205323	0.0438596	1.76119	0.391304	1.26572	1.05586	1.04902	1.04829	1.2913	1.83473	2.09467	1.64086	1.81154	1.13348	1.04966	1.07868	1.19935	1.02619	1.78717	1.45363
8.33283e-23	-1.5646	0.091	0.269	2.80783e-18	cTEC	Alox15	-17.5516	0.189036	0.0164654	0.464286	0.0573356	0.444101	1.05692	1.83369	0.830619	0.0313901	0.14554	0.0508475	0.0571429	0.0722433	0.00877193	0.0149254	0	1.12055	1.01021	1.30732	1.04861	1.42971	1.24489	1.48389	1.37961	1.03299	1.06698	1.01825	1.03196	1.03313	1.0024	1.00483	1
4.6812e-23	-2.39443	0.093	0.255	1.57738e-18	cTEC	Has2os	-17.8021	0.117202	0.0834248	0.0994898	0.145025	0.150095	1.17634	2.7322	0.489414	0.188341	0.0985915	0.0169492	0.317857	0.0190114	0.0175439	0.462687	0	1.06099	1.0492	1.0829	1.09806	1.17186	1.2793	1.73081	1.27392	1.17721	1.05531	1.01211	1.26914	1.01656	1.00456	1.33585	1
4.4971e-23	-2.01569	0.096	0.268	1.51534e-18	cTEC	Crb3	-17.8195	0.119093	0.0735456	0.471939	0.370995	0.0285442	1.01897	1.07846	0.960098	0.533632	0.981221	1.49153	0.610714	0.0532319	1.01754	0	0	1.0461	1.04084	1.26417	1.18137	1.02663	1.22701	1.29057	1.4133	1.36588	1.41607	1.51156	1.28892	1.02709	1.25273	1	1
3.79288e-23	-1.17859	0.507	0.634	1.27805e-18	cTEC	Klf6	-17.8935	2.14367	1.28211	3.02041	4.87352	1.49762	5.47098	8.54371	5.74756	3.89686	8.87793	6.9661	3.07857	3.38403	1.45614	1.71642	0.73913	1.76706	1.57875	2.27456	2.51473	2.26049	2.00722	2.60911	2.69716	2.88524	3.02317	2.39821	2.15734	2.61152	1.35315	1.90069	1.87517
3.52399e-23	-2.24897	0.098	0.271	1.18744e-18	cTEC	Galnt7	-17.9254	0.136106	0.139407	0.665816	0.118044	0.15628	1.79241	1.19957	1.15391	0.0852018	0.985915	0.881356	0.707143	0.653992	0.192982	0.462687	0.217391	1.06798	1.08854	1.37591	1.0609	1.17801	1.40126	1.37453	1.6176	1.08142	1.43733	1.29215	1.46869	1.60722	1.06748	1.2677	1.28958
2.44371e-23	-1.36993	0.376	0.543	8.23431e-19	cTEC	Lrba	-18.0844	0.68242	1.03074	2.34694	0.929174	0.647954	1.61607	1.86866	2.85261	1.89238	8.51643	2.28814	2.34286	0.844106	1.55263	0.701493	0.173913	1.35394	1.51863	2.13684	1.49022	1.69788	1.40949	1.62017	2.23214	2.235	3.07509	1.65484	2.14068	1.69836	1.48123	1.316	1.20384
1.55445e-23	-2.82012	0.096	0.257	5.23788e-19	cTEC	Plekha4	-18.2808	0.10775	0.0944018	0.186224	0.155143	0.166508	0.433036	3.0145	2.09853	0.843049	0.431925	0.0677966	0.114286	0.0608365	0.0877193	0.373134	0	1.06005	1.06093	1.13214	1.09867	1.21076	1.11831	1.77796	1.79245	1.54848	1.21798	1.0212	1.08527	1.06591	1.02247	1.4133	1
1.42673e-23	-1.55794	0.263	0.449	4.80752e-19	cTEC	Npas2	-18.3181	0.493384	0.605928	0.744898	0.423272	0.518554	2.99219	3.40341	1.44218	1.88341	0.568075	0.762712	0.207143	0.0988593	0.210526	1.23881	0.173913	1.24839	1.35085	1.50757	1.25164	1.57563	1.67413	1.9435	1.74389	2.25402	1.26174	1.25701	1.16399	1.099	1.05914	1.47731	1.13235
1.20765e-23	-2.21444	0.095	0.272	4.06929e-19	cTEC	Ly6h	-18.3905	0.232514	0.232711	0.0280612	0.0320405	0.371075	3.74107	6.34755	0.301303	0.0134529	0.657277	0	0.0321429	0.0190114	0.0350877	0	0	1.11858	1.13836	1.02662	1.02283	1.30387	1.70207	2.16288	1.13631	1.009	1.3258	1	1.01332	1.02944	1.0098	1	1
8.89707e-24	-1.08943	0.422	0.54	2.99796e-19	cTEC	Msn	-18.5232	0.990548	0.416026	0.237245	0.440135	0.789724	5.63058	6.81322	1.77687	3.21076	1.00469	0.220339	1.46071	1.46008	0.0964912	1.92537	1.30435	1.45238	1.22315	1.21741	1.28216	1.71086	1.9809	2.31962	1.7382	2.56618	1.47716	1.07542	1.76367	1.96406	1.02874	1.85057	2.25069
4.13558e-24	-1.77983	0.198	0.356	1.39353e-19	cTEC	Sgk3	-18.8559	0.300567	0.289791	0.326531	0.20742	0.204567	3.29799	2.76034	0.876221	0.479821	0.826291	0.440678	1.02143	0.501901	0.377193	0.164179	0.0434783	1.1244	1.16715	1.2438	1.10911	1.22741	1.6306	1.68914	1.41996	1.43087	1.36979	1.17267	1.65004	1.37497	1.12227	1.07844	1.07604
3.79639e-24	-1.38882	0.395	0.409	1.27923e-19	cTEC	Airn	-18.8931	0.697543	1.4764	2.31888	3.2226	1.42935	0.745536	0.631557	0.441368	0.394619	0.760563	1.44068	1.36429	0.745247	1.09649	4.59701	0.826087	1.3662	1.7538	2.1443	2.32014	2.21983	1.21597	1.19022	1.31873	1.25445	1.36428	1.45564	1.64255	1.66542	1.37196	2.48635	1.90361
3.51539e-24	-1.96639	0.108	0.289	1.18454e-19	cTEC	Gm13391	-18.9264	0.215501	0.0208562	0.0127551	0.151771	0.322074	2.65179	3.80512	0.692997	0.0986547	0.131455	0.0677966	0.503571	0.0380228	0.0263158	0.0149254	0	1.12354	1.0142	1.01153	1.10574	1.38599	1.57389	1.88714	1.30512	1.08984	1.09405	1.0258	1.30787	1.03426	1.00671	1.01137	1
2.56152e-24	-1.80282	0.233	0.422	8.63129e-20	cTEC	Ehf	-19.0639	0.41966	0.0428101	2.71429	1.2597	0.618934	1.89844	1.39872	1.76547	0.533632	3.6385	4.72881	7.07857	0.190114	0.0350877	0.0149254	0	1.21455	1.02889	2.29478	1.56276	1.6133	1.42516	1.42394	1.89287	1.42814	2.22236	2.09759	3.12757	1.07743	1.01083	1.00742	1
1.99476e-24	-1.53659	0.614	0.636	6.72156e-20	cTEC	Pde4d	-19.1725	2.11531	1.80351	3.64286	2.41484	2.42674	1.42076	7.65203	9.11645	23.4664	8.91549	0.355932	18.5607	2.54373	2.29825	1.28358	0.26087	1.91988	1.84283	2.53758	2.06133	2.67266	1.4063	2.69357	3.47108	5.22144	3.01703	1.14323	4.51159	2.64025	1.69298	1.56483	1.32124
1.4662e-24	-2.1381	0.081	0.257	4.9405e-20	cTEC	Tamalin	-19.3062	0.115312	0.0801317	0.0892857	0.0876897	0.232873	2.92634	1.26482	0.513844	0.197309	2.16432	0.610169	0.5	0.509506	0.149123	0.343284	0.652174	1.0761	1.04667	1.07149	1.05463	1.30483	1.60703	1.37124	1.33873	1.16114	1.71483	1.22667	1.27883	1.30026	1.03821	1.14783	1.80382
1.04178e-24	-1.5396	0.416	0.517	3.51037e-20	cTEC	Pde1c	-19.4546	0.877127	0.699232	1.64796	0.841484	0.970742	5.13616	6.61962	1.83958	1.35426	3.00469	35.3898	0.660714	0.0912548	0.0175439	0.0746269	0.0434783	1.41911	1.34444	1.94415	1.46803	1.9189	1.98356	2.48711	1.79021	1.98404	2.03051	4.30925	1.20481	1.07984	1.01487	1.02835	1.07333
6.29334e-25	-1.68894	0.149	0.344	2.1206e-20	cTEC	Gusb	-19.6735	0.196597	0.21405	0.34949	0.335582	0.284015	3.82366	1.82772	0.408795	0.269058	0.422535	0.779661	0.807143	0.368821	0.429825	0.597015	0.173913	1.10652	1.11991	1.20406	1.16563	1.27373	1.72673	1.45037	1.18721	1.22309	1.20686	1.25168	1.41784	1.22045	1.11286	1.317	1.22909
6.15265e-25	-2.41807	0.089	0.26	2.0732e-20	cTEC	Sntb1	-19.6834	0.153119	0.720088	1.1301	0.919056	0.362274	0.217634	0.816205	1.07818	0.825112	0.723005	0.932203	3.25	0.102662	0.877193	0.776119	0	1.09114	1.40908	1.69062	1.47194	1.43194	1.07817	1.33234	1.5802	1.54212	1.28333	1.33767	2.33588	1.07704	1.3378	1.66372	1
3.81929e-25	-1.84834	0.202	0.394	1.28695e-20	cTEC	Colq	-19.8904	0.483932	0.0230516	0.0178571	0.0455312	0.994529	5.82031	3.90235	1.57003	0.278027	0.596244	0.0338983	0.832143	0.825095	0.0175439	0.38806	0	1.25554	1.01445	1.01432	1.03277	1.88084	2.10997	2.03138	1.7134	1.26989	1.26927	1.01213	1.59216	1.8296	1.00474	1.172	1
3.53874e-25	-1.87868	0.127	0.312	1.19241e-20	cTEC	Ebp	-19.9236	0.139887	0.285401	0.459184	0.445194	0.125595	1.70089	1.11898	0.4943	0.152466	0.615023	1.45763	0.317857	0.307985	0.701754	0.716418	0.434783	1.05566	1.15457	1.23785	1.23525	1.10077	1.3551	1.29056	1.22217	1.09306	1.25903	1.46858	1.11685	1.20118	1.17976	1.3777	1.5777
2.78691e-25	-1.10112	0.482	0.572	9.39078e-21	cTEC	Fnbp1	-20.0273	0.884688	0.844127	0.706633	0.521079	0.509277	2.17969	5.1629	2.94381	1.78027	2.34742	3.11864	2.55	2.01901	0.578947	1.47761	0	1.42892	1.44883	1.45564	1.26213	1.57283	1.49542	2.1597	2.16723	2.12231	1.90797	1.79342	2.31234	2.33822	1.22167	1.54649	1
2.04272e-25	-1.76655	0.427	0.579	6.88314e-21	cTEC	Crip1	-20.1622	1.5293	1.7157	4.76276	2.58347	0.947669	5.5	6.47889	10.2077	15.2152	4.55869	3.88136	9.71071	6.44867	0.885965	18.5522	4.30435	1.53026	1.76701	2.48634	2.1374	1.68346	1.95327	2.24095	3.17885	4.31645	2.34604	2.14713	3.41548	2.77186	1.22213	4.1938	3.43646
6.28971e-26	-1.94024	0.089	0.28	2.11938e-21	cTEC	Adam8	-20.6738	0.119093	0.00987925	0.137755	0.0185497	0.156755	1.95536	1.60213	1.27443	0.0358744	0.0985915	0.0508475	0.114286	0.125475	0.0350877	0.0298507	0	1.07611	1.00584	1.10439	1.01095	1.20045	1.44148	1.42751	1.61757	1.02392	1.05625	1.018	1.10652	1.06549	1.01214	1.00813	1
5.01101e-26	-5.57341	0.121	0.294	1.68851e-21	cTEC	Reg3g	-20.7725	0.173913	0.12404	56.5842	0.175379	0.137488	0.947545	11.6546	43.987	25.3184	19.2019	0.237288	2.22857	0.0456274	0.508772	0.298507	0.0434783	1.08709	1.06997	5.18516	1.13255	1.1588	1.23657	2.82238	4.95679	4.78102	3.7698	1.10005	1.54006	1.06917	1.11398	1.17668	1.14474
2.40299e-26	-2.49687	0.089	0.268	8.09712e-22	cTEC	Gca	-21.0917	0.100189	0.025247	0.160714	0.148398	0.049001	0.697545	1.67676	1.04886	1.15247	1.25822	0.677966	1.16786	0.0988593	0.482456	0.0298507	0	1.04657	1.01627	1.14402	1.07749	1.05469	1.16428	1.47795	1.52042	1.89158	1.50447	1.24692	1.53102	1.05402	1.16187	1.03423	1
2.22247e-26	-1.06775	0.386	0.487	7.48883e-22	cTEC	Skint10	-21.1256	1.59924	0.0515917	0.0765306	0.0387858	1.304	19.5982	12.6998	4.62215	1.94619	1.93897	0.0338983	0.832143	0.0760456	0.122807	0.0149254	0	1.69519	1.03075	1.04712	1.02641	1.88628	3.09418	2.88009	2.40453	2.18226	1.70605	1.01867	1.28793	1.09103	1.02823	1.02344	1
1.06769e-26	-1.93513	0.178	0.382	3.5977e-22	cTEC	Mxd1	-21.444	0.270321	0.184413	0.44898	0.350759	0.331351	1.23438	2.04648	3.26873	1.80717	1.89202	0.915254	0.792857	0.692015	0.22807	0.119403	0.173913	1.16466	1.10686	1.31606	1.17722	1.41028	1.31539	1.60528	2.29518	2.0621	1.78657	1.31186	1.50129	1.49633	1.07172	1.06733	1.27358
9.34111e-27	-2.02487	0.085	0.278	3.14758e-22	cTEC	Tmprss4	-21.502	0.119093	0.0109769	0.487245	0.263069	0.262369	2.15513	0.778252	1.11075	0.690583	1.30047	0.864407	0.760714	0.0646388	0.0175439	0	0	1.07567	1.00774	1.26732	1.12009	1.29168	1.46928	1.22731	1.52334	1.43012	1.57887	1.25826	1.30505	1.06953	1.00563	1	1
9.21534e-27	-1.81141	0.376	0.567	3.1052e-22	cTEC	Ly6a	-21.5079	3.12098	19.7717	33.8495	17.5649	7.63963	4.22545	2.28657	6.85586	5.87892	0.56338	8.76271	0.253571	1.9962	0.438596	18.6418	16.4783	2.03807	4.3143	5.00003	4.09293	3.44005	1.86254	1.57202	2.76734	2.85058	1.22844	2.84312	1.18119	1.5957	1.10412	3.82968	5.25555
5.81394e-27	-1.96847	0.13	0.335	1.95907e-22	cTEC	Pkia	-21.708	0.204159	0.159166	0.344388	0.215852	0.265937	1.90179	2.67633	1.04316	0.408072	3.7277	0.59322	0.85	0.0152091	0.175439	0.358209	0	1.11656	1.09562	1.21201	1.1482	1.28284	1.41803	1.73094	1.50507	1.32608	2.21893	1.21259	1.44972	1.01702	1.05565	1.23527	1
4.34107e-27	-2.23313	0.144	0.34	1.46277e-22	cTEC	Magi3	-21.8348	0.206049	0.265642	2.19388	0.527825	0.217888	1.20536	1.23923	1.56596	1.15247	2.46479	2.79661	1.18214	1.4943	0.754386	0.597015	0.391304	1.10992	1.15832	2.1027	1.25825	1.25737	1.33842	1.44717	1.81214	1.81708	1.9254	1.78758	1.65138	2.12575	1.297	1.52122	1.44279
2.611e-27	-1.80606	0.248	0.436	8.79803e-23	cTEC	Gas7	-22.0556	0.413989	0.330406	0.331633	0.519393	0.4353	3.26786	2.89041	2.85993	4.03587	0.535211	0.220339	1.00714	0.13308	0.0263158	1.37313	0.73913	1.23744	1.19766	1.25854	1.31898	1.5288	1.70534	1.85654	2.29775	2.96493	1.29465	1.08609	1.68995	1.08371	1.00695	1.8495	1.53571
1.54051e-27	-1.60184	0.287	0.404	5.19091e-23	cTEC	Ehd1	-22.2848	0.398866	0.456641	0.27551	0.279933	0.188392	2.40737	4.37058	1.89658	1.12556	0.389671	0.491525	0.917857	0.307985	0.342105	1	0.391304	1.16883	1.23058	1.19804	1.15422	1.17048	1.49649	1.93967	1.73427	1.67367	1.17881	1.15848	1.41012	1.18794	1.08983	1.45398	1.51793
1.49744e-27	-2.42458	0.066	0.251	5.04577e-23	cTEC	Mdfic	-22.2971	0.0926276	0.136114	0.619898	0.155143	0.220266	0.84375	0.6371	0.684039	0.587444	0.300469	0.237288	0.875	0.243346	0.192982	1.13433	0.652174	1.05106	1.08811	1.42296	1.10484	1.25249	1.21093	1.23555	1.41908	1.54453	1.14964	1.09765	1.5401	1.14892	1.05099	1.49196	1.78729
7.72967e-28	-1.64085	0.323	0.378	2.60459e-23	cTEC	Irf7	-22.5843	0.612476	1.07135	3.59949	0.81113	1.37678	0.262277	0.521535	0.594463	0.744395	0.41784	3.86441	1.37143	0.403042	0.587719	0.626866	0.565217	1.24442	1.54605	2.46651	1.45517	2.0154	1.106	1.17602	1.34252	1.59529	1.22306	2.09799	1.78609	1.23751	1.14972	1.27576	1.71504
7.07831e-28	-2.34722	0.151	0.309	2.38511e-23	cTEC	Rogdi	-22.6225	0.183365	0.207464	0.117347	0.298482	0.0620837	2.14509	4.23241	0.644951	0.488789	0.732394	0.559322	0.478571	0.406844	0.517544	0.0746269	0	1.07456	1.11852	1.08368	1.14719	1.06441	1.45002	1.90487	1.29952	1.338	1.35226	1.17651	1.22914	1.22086	1.12778	1.04443	1
6.51745e-28	-2.04442	0.172	0.375	2.19612e-23	cTEC	Ptk2b	-22.6583	0.219282	0.194292	0.32398	0.175379	0.347526	1.39844	1.67974	1.43241	0.811659	0.901408	0.694915	0.621429	1.20532	0.298246	0.0447761	0	1.11945	1.11809	1.25723	1.10554	1.42335	1.34751	1.52747	1.72734	1.56277	1.44043	1.18645	1.39237	1.95498	1.10237	1.01865	1
6.51256e-28	-2.72038	0.068	0.254	2.19447e-23	cTEC	Gm31416	-22.6587	0.145558	0.0131723	0.0178571	0.3457	0.902236	1.17188	0.501066	0.143322	0.107623	0.107981	0.0338983	0.246429	0.026616	0.0175439	0.0597015	0.0434783	1.08164	1.0117	1.01464	1.24293	1.92576	1.31563	1.19049	1.09317	1.11993	1.07388	1.02783	1.14406	1.02809	1.00388	1.04559	1.10201
5.636e-28	-1.50172	0.44	0.569	1.89911e-23	cTEC	Ccl19	-22.7215	2.40832	0.3809	0.219388	1.57336	3.15961	16.0324	31.5164	10.7484	2.52018	0.699531	0.305085	0.367857	0.0646388	0.105263	5.97015	0	1.95047	1.23597	1.16168	1.95546	2.50095	2.90738	3.91911	3.21043	1.90226	1.33729	1.16933	1.191	1.07094	1.02105	2.5986	1
4.18006e-28	-1.86775	0.193	0.411	1.40851e-23	cTEC	C3	-22.8512	0.699433	0.90011	3.40306	0.473862	2.45956	0.598214	0.982516	2.75407	0.663677	1.99061	0.135593	0.203571	0.0646388	0.0964912	26.8209	0.0434783	1.3499	1.46721	2.47947	1.38348	2.51436	1.17713	1.29189	2.07479	1.45321	1.77226	1.06005	1.16014	1.04552	1.02011	4.21518	1.05205
3.70127e-28	-1.23951	0.18	0.411	1.24718e-23	cTEC	Alox12e	-22.9041	0.722117	0.0329308	0.977041	0.0927487	0.904853	3.87946	5.22687	3.08876	0.605381	0.774648	1.20339	0.217857	0.026616	0.0263158	0	0	1.37215	1.02144	1.55791	1.06515	1.80952	1.7496	2.08208	2.10247	1.56157	1.30636	1.48597	1.09444	1.02213	1.00741	1	1
2.62537e-28	-1.26077	0.473	0.623	8.84645e-24	cTEC	Pam	-23.0532	1.13422	0.571899	1.89031	0.885329	1.28425	3.94531	3.87249	3.44463	2.99552	12.4789	25.661	2.56071	0.18251	1.03509	3.59701	0.608696	1.52251	1.316	1.96427	1.47554	2.03671	1.85003	1.98144	2.29527	2.62762	3.50248	3.88819	2.14303	1.21049	1.30378	2.19429	1.52449
1.75155e-28	-2.44846	0.151	0.309	5.90202e-24	cTEC	Snrnp25	-23.229	0.162571	0.111965	0.0561224	0.150084	0.0661275	5.42299	4.74072	0.827362	0.0941704	0.29108	0.305085	1.65357	0.34981	0.385965	0.119403	0.173913	1.08404	1.06255	1.03422	1.07627	1.05567	1.91555	1.96009	1.34391	1.08762	1.12663	1.09396	1.90241	1.20571	1.11076	1.05608	1.29571
1.48104e-28	-2.42661	0.093	0.291	4.99051e-24	cTEC	Sspo	-23.3019	0.122873	0.0208562	0.0331633	0.0370995	0.0892008	1.30357	2.65458	1.32736	1.36771	0.0751174	0.0169492	0.0714286	0.0228137	0.0350877	0.0149254	0	1.0767	1.01544	1.03622	1.02699	1.1343	1.35006	1.80751	1.73138	2.08304	1.04855	1.01585	1.04438	1.01439	1.00807	1.00543	1
2.98021e-29	-1.45657	0.359	0.503	1.00421e-24	cTEC	AU020206	-23.9982	0.646503	0.296378	0.147959	0.426644	0.768792	5.93527	4.62473	2.22638	1.30493	0.71831	0.220339	0.171429	0.38403	0.447368	0.283582	0.391304	1.34028	1.17628	1.13312	1.26977	1.79787	2.0465	2.11584	1.9891	1.91473	1.27145	1.09175	1.10889	1.31832	1.13551	1.26642	1.57799
2.92031e-29	-1.66294	0.219	0.448	9.84029e-25	cTEC	Crybg1	-24.007	0.364839	0.601537	1.26786	0.686341	0.645338	1.78237	1.8064	1.07166	0.399103	0.539906	1.49153	0.407143	0.304183	0.0350877	0	0	1.20586	1.36087	1.82951	1.35303	1.70961	1.45608	1.5547	1.64271	1.41048	1.24864	1.50941	1.30143	1.23354	1.00855	1	1
1.91208e-29	-1.81377	0.115	0.334	6.44293e-25	cTEC	Slc38a1	-24.1909	0.200378	0.0164654	0.0714286	0.112985	0.178164	2.28795	2.46652	1.01303	0.946188	2.70423	0.40678	1.15714	1.55133	0.535088	0.0149254	0	1.1247	1.01082	1.05055	1.07525	1.21776	1.46909	1.66776	1.5048	1.75874	2.04175	1.14556	1.59896	2.00483	1.18772	1.00429	1
1.31937e-29	-3.40737	0.204	0.399	4.44575e-25	cTEC	AW112010	-24.3521	0.374291	0.263447	5.89031	0.153457	0.25666	2.20647	5.90448	19.8249	20.9641	20.8404	5.20339	0.282143	1.39544	0.131579	2.55224	3.56522	1.18553	1.14668	2.61032	1.0933	1.23553	1.46429	2.17948	3.98281	4.35317	3.84479	2.42631	1.19713	1.71472	1.04822	1.93071	3.36684
1.03427e-29	-1.60852	0.293	0.356	3.48507e-25	cTEC	Lad1	-24.4578	0.413989	0.126235	0.308673	0.328836	0.0858706	2.91071	4.87377	2.38925	0.533632	0.42723	0.644068	0.296429	0.117871	0.0614035	0	0	1.16647	1.07434	1.1959	1.15213	1.0884	1.56818	2.01645	1.87701	1.32879	1.18496	1.2053	1.16449	1.06932	1.01525	1	1
8.10625e-30	-1.61616	0.31	0.507	2.73148e-25	cTEC	Gm49708	-24.5636	1.17202	0.823271	0.469388	0.947723	2.62964	20.9654	5.66567	1.33958	1.90135	0.253521	0.881356	1.35714	0.201521	0.578947	0.119403	0.0869565	1.57225	1.38074	1.3716	1.45016	2.69095	3.19589	2.20475	1.74803	2.51495	1.14384	1.27036	1.39408	1.1372	1.13303	1.09899	1.1023
2.49613e-30	-1.39567	0.448	0.572	8.41096e-26	cTEC	Ube2e2	-25.0752	0.862004	1.61142	2.14031	1.71669	0.872027	3.73772	4.38507	2.0798	2.24664	2.48357	3.18644	2.12857	0.258555	1.92105	3.22388	0.304348	1.41498	1.7871	2.08471	1.7633	1.84198	1.7693	2.12527	1.93654	2.24827	1.95608	1.87026	1.93825	1.25093	1.64093	2.16442	1.38126
1.95651e-30	-1.64715	0.357	0.57	6.59266e-26	cTEC	Gramd1b	-25.1809	0.903592	0.0603732	0.869898	0.241147	1.23097	8.01897	5.59957	7.52606	3.4574	3.22535	0.881356	2.44643	0.961977	1.17544	0.19403	0.0434783	1.52073	1.03352	1.5479	1.16019	2.12221	2.37092	2.38464	3.21341	2.66025	2.12077	1.26573	2.1048	1.54625	1.39012	1.12634	1.02566
1.63929e-30	-1.14058	0.584	0.665	5.52374e-26	cTEC	Tank	-25.2578	1.34972	0.60483	0.977041	1.09106	1.20932	5.99554	5.42942	3.86401	5.50673	1.86854	3.47458	3.56786	1.59696	0.622807	0.865672	0.434783	1.57117	1.31561	1.59859	1.55821	1.98497	2.06133	2.22038	2.38996	3.27099	1.72699	1.94242	2.4305	1.83419	1.18231	1.33074	1.40042
1.19937e-30	-1.86214	0.217	0.419	4.04139e-26	cTEC	Stat5a	-25.3935	0.302457	0.127333	0.170918	0.112985	0.493102	3.62165	2.54115	1.26384	0.278027	0.830986	0.491525	0.364286	0.718631	0.0964912	0.164179	0.0869565	1.15185	1.0801	1.10582	1.07114	1.50266	1.71612	1.70966	1.54732	1.24131	1.38422	1.17794	1.19064	1.64577	1.02408	1.07962	1.12541
4.39195e-31	-1.67836	0.268	0.511	1.47991e-26	cTEC	Xylt1	-25.8298	0.672968	0.162459	0.418367	0.198988	2.6539	3.69085	1.41493	1.22638	1.56054	1.34742	0.949153	0.171429	0.509506	0.114035	0.447761	0.217391	1.45393	1.10796	1.32904	1.13224	2.84217	1.8185	1.51119	1.67194	2.07818	1.64977	1.31387	1.11307	1.38507	1.05726	1.20759	1.26036
2.5813e-31	-1.24066	0.471	0.557	8.69795e-27	cTEC	Tnip1	-26.0606	0.992439	0.290889	0.522959	0.413153	0.536156	3.47879	5.56716	4.01384	2.33632	1.74648	0.745763	1.75357	0.661597	0.184211	0.507463	0.130435	1.41237	1.17546	1.36252	1.23216	1.57188	1.71367	2.25284	2.45634	2.40449	1.67185	1.27139	1.93372	1.62041	1.05334	1.27392	1.18942
2.1698e-31	-2.66329	0.142	0.348	7.31135e-27	cTEC	Dscaml1	-26.136	0.20983	0.0976948	0.209184	0.111298	0.28901	1.20089	2.56503	4.79642	2.62332	1.92019	2.52542	4.93571	0.18251	0.0350877	0	0	1.13088	1.07038	1.16747	1.04453	1.36823	1.2693	1.75519	2.68376	2.36351	1.72345	1.69865	2.91973	1.0999	1.02383	1	1
1.90448e-31	-1.79859	0.374	0.417	6.41733e-27	cTEC	Tmem158	-26.1926	0.697543	2.26564	0.30102	0.440135	0.464795	19.8705	8.31471	0.855049	0.443946	1.6338	0.372881	0.585714	0.102662	0.0526316	0.746269	0.173913	1.28724	1.9252	1.21138	1.23656	1.33454	3.04208	2.34361	1.36933	1.28816	1.59955	1.15513	1.1903	1.09299	1.01541	1.35687	1.28865
8.61709e-32	-2.00322	0.289	0.352	2.90362e-27	cTEC	Igfbp4	-26.5371	0.644612	6.42261	0.57398	1.3204	2.0107	0.607143	0.129638	0.251629	0.376682	1.71831	0.152542	0.542857	0.258555	0.210526	18.3582	0.608696	1.27233	2.89712	1.43513	1.64033	2.26317	1.1549	1.04584	1.16728	1.30365	1.68289	1.0802	1.18237	1.16058	1.06033	3.92847	1.67753
8.53424e-32	-1.80374	0.221	0.465	2.8757e-27	cTEC	Skint7	-26.5413	0.550095	0.0493963	0.42602	0.0758853	1.897	2.29018	1.75608	2.06352	0.67713	0.539906	0.0338983	0.414286	0.114068	0.0350877	0	0	1.30662	1.03289	1.39831	1.0554	2.38625	1.52361	1.51298	2.00701	1.5086	1.27198	1.01263	1.25247	1.11942	1.00815	1	1
8.5116e-32	-2.74047	0.064	0.263	2.86807e-27	cTEC	Acot7	-26.5424	0.0718336	0.0592755	0.109694	0.0860034	0.0801618	1.66853	1.34712	0.663681	0.529148	1.64789	0.220339	0.453571	0.608365	0.289474	0.149254	0.0869565	1.03443	1.03234	1.0771	1.05607	1.09549	1.36822	1.36923	1.33983	1.45297	1.64353	1.06015	1.29378	1.3654	1.0741	1.0934	1.15283
7.17539e-32	-3.60408	0.066	0.251	2.41782e-27	cTEC	Traf1	-26.6166	0.0680529	0.119649	0.0892857	0.111298	0.11275	0.366071	1.58593	2.18893	2.61883	0.14554	0.135593	0.135714	0.935361	0.245614	0.268657	0.0869565	1.02897	1.06693	1.05639	1.0688	1.14034	1.08858	1.4628	1.88066	2.47906	1.07756	1.04243	1.09092	1.5052	1.06293	1.1206	1.16395
6.24423e-32	-3.33282	0.14	0.329	2.10406e-27	cTEC	Nrg1	-26.6769	0.310019	0.369923	0.744898	0.428331	0.150095	1.48214	11.0358	5.0855	4.31839	10.385	0.610169	5.52857	0.129278	0.140351	0.149254	0.0434783	1.15456	1.21079	1.48072	1.24336	1.16295	1.35581	3.07556	2.68752	2.71431	3.43252	1.26397	2.7487	1.09118	1.04283	1.04267	1.06095
4.61069e-32	-2.98281	0.068	0.268	1.55362e-27	cTEC	Rhobtb1	-26.8087	0.0850662	0.140505	0.127551	0.133221	0.252854	0.465402	0.95693	1.17427	1.71749	1.68075	0.186441	0.15	0.0228137	0.0789474	0.268657	0.304348	1.04251	1.08862	1.10801	1.08676	1.30184	1.11369	1.32069	1.63287	2.14017	1.72406	1.10306	1.08526	1.01027	1.01877	1.09224	1.36299
4.51523e-32	-3.15427	0.147	0.333	1.52145e-27	cTEC	Gm8113	-26.8177	1.00189	0.605928	1.93367	0.976391	11.5112	0.684152	0.248188	0.631922	1.01345	0.300469	2.22034	1.55357	0.231939	0.54386	0.0298507	0.0434783	1.55998	1.38615	2.1351	1.63381	4.62356	1.18352	1.09374	1.46784	2.14637	1.18772	1.60148	1.58067	1.23234	1.15864	1.01547	1.06095
3.86077e-32	-1.88007	0.244	0.381	1.30093e-27	cTEC	Cnp	-26.8857	0.334594	0.417124	0.265306	0.291737	0.146051	3.71652	4.91386	1.27769	1.67265	0.751174	1.30508	0.442857	0.653992	0.0526316	1.37313	0.0869565	1.13931	1.21275	1.17898	1.15517	1.12606	1.67271	1.97578	1.49582	1.88217	1.3141	1.36929	1.20979	1.5182	1.01642	2.12802	1.14021
3.02408e-32	-2.53957	0.115	0.327	1.01899e-27	cTEC	Il18r1	-26.9918	0.164461	0.0691548	0.742347	0.0657673	0.571361	1.73772	1.79744	1.09853	1.11211	0.553991	0.322034	0.339286	0.0760456	0.0438596	0.0298507	0	1.09435	1.04939	1.44564	1.05636	1.64131	1.39743	1.54023	1.48547	1.88564	1.26957	1.11128	1.28731	1.07555	1.01085	1.01269	1
2.47783e-32	-1.24426	0.448	0.417	8.34931e-28	cTEC	Nup85	-27.0783	0.848771	0.313941	0.196429	0.27656	0.268316	3.32254	8.99787	3.23779	1.40807	0.253521	0.355932	0.164286	0.171103	0.166667	0.253731	0.0434783	1.3432	1.1725	1.15019	1.15263	1.25364	1.65646	2.53471	2.03518	1.81796	1.11962	1.12414	1.10132	1.14883	1.0527	1.11536	1.05377
1.38777e-32	-2.42991	0.129	0.342	4.67624e-28	cTEC	Vim	-27.3301	0.52741	0.151482	0.0357143	1.86003	0.666032	16.2254	9.68955	1.19055	0.735426	0.0892019	0.474576	0.528571	3.94297	0.122807	22.806	4.86957	1.21712	1.07818	1.02476	1.98232	1.41712	2.87263	2.50576	1.4104	1.36999	1.04962	1.08629	1.12741	2.15944	1.04075	4.5062	3.66585
5.04078e-33	-2.28693	0.076	0.293	1.69854e-28	cTEC	Spib	-27.7699	0.109641	0.00329308	0.0484694	0.0168634	0.203853	2.66518	1.81237	0.385179	6.03587	0.056338	0.0338983	1.78214	0.117871	0	0.119403	0	1.07567	1.0016	1.04915	1.01565	1.191	1.54075	1.45607	1.20209	3.23822	1.02859	1.01479	1.85108	1.0855	1	1.05501	1
1.59633e-33	-2.42144	0.076	0.293	5.37898e-29	cTEC	Dusp4	-28.2693	0.100189	0.0120746	0.242347	0.0438449	0.174596	1.26228	1.71087	1.2329	0.721973	0.99061	0.525424	0.414286	0.102662	0.0526316	0.104478	0	1.06242	1.00609	1.15732	1.02628	1.22655	1.30253	1.47828	1.63373	1.58819	1.45538	1.17224	1.23334	1.11331	1.0182	1.06693	1
9.16008e-34	-1.01778	0.448	0.42	3.08658e-29	cTEC	H2-Oa	-28.5105	1.02079	0.384193	0.193878	0.109612	0.344434	5.70201	9.71386	4.95603	0.919283	0.2723	0.118644	0.267857	0.34981	0.0789474	0.0149254	0.0869565	1.44796	1.21381	1.16638	1.06405	1.25709	1.96139	2.5886	2.37212	1.49559	1.11982	1.05968	1.14089	1.18252	1.03126	1.00483	1.17946
5.90892e-34	-1.73504	0.265	0.397	1.99107e-29	cTEC	Tfdp1	-28.7009	0.37051	0.290889	0.244898	0.264755	0.185775	6.67076	4.02942	1.05375	0.623318	0.525822	0.627119	0.35	0.562738	3.9386	0.462687	0.0869565	1.15465	1.17006	1.17404	1.13737	1.18642	2.04773	1.87023	1.44096	1.43637	1.24505	1.19228	1.14501	1.35875	1.93112	1.19798	1.10245
3.84265e-34	-3.28383	0.059	0.267	1.29482e-29	cTEC	Cxcl9	-28.8878	0.31758	0.0230516	0.0408163	0.268128	0.509039	6.08929	10.2981	2.98453	0.452915	0.305164	0.627119	0.135714	0.330798	0.587719	2.52239	0.73913	1.10231	1.0152	1.03457	1.18397	1.42282	1.98795	2.62582	1.89331	1.33259	1.1399	1.19606	1.0635	1.13112	1.16579	1.70923	1.9876
2.65362e-34	-1.75386	0.274	0.34	8.94164e-30	cTEC	Cd40	-29.0486	0.466919	0.0263447	0.0433673	0.0489039	0.178877	5.51451	7.09382	1.78664	0.565022	0.122066	0.0169492	0.0607143	0.258555	0.0877193	0.0746269	0.0434783	1.19155	1.01325	1.03672	1.03003	1.1772	1.9455	2.31021	1.64679	1.38559	1.05181	1.00638	1.03529	1.14649	1.02563	1.05286	1.14474
2.64804e-34	-1.85017	0.329	0.495	8.92284e-30	cTEC	Sirt1	-29.0495	0.676749	0.341383	0.497449	0.458685	0.862036	3.17188	8.79062	3.89251	0.847534	1.64789	1.0339	1.22143	0.406844	0.315789	0.164179	0.173913	1.3718	1.19138	1.38654	1.26953	1.88125	1.67276	2.70563	2.48718	1.73142	1.66903	1.31831	1.81996	1.35461	1.11057	1.10434	1.38082
2.23833e-34	-2.93339	0.098	0.288	7.54228e-30	cTEC	Pold1	-29.1225	0.102079	0.0856202	0.114796	0.0927487	0.0927688	2.67857	3.39062	0.473941	2.48879	0.0938967	0.186441	0.139286	0.136882	0.0614035	0.104478	0	1.04643	1.05345	1.10554	1.05255	1.10437	1.54424	1.75513	1.23967	2.34194	1.06466	1.08473	1.08948	1.06572	1.01771	1.038	1
1.46994e-34	-1.41629	0.331	0.403	4.9531e-30	cTEC	Sdhaf1	-29.3051	0.500945	0.287596	0.229592	0.376054	0.145338	4.21652	4.39787	1.77362	1.55605	1.24883	1.05085	0.775	0.353612	0.877193	0.462687	0.0869565	1.19089	1.15332	1.1416	1.19606	1.11663	1.75781	1.91789	1.70667	1.79562	1.49741	1.32005	1.28111	1.29238	1.24595	1.29622	1.17134
1.45983e-34	-1.01627	0.501	0.509	4.91904e-30	cTEC	Yipf1	-29.3081	0.844991	0.605928	0.859694	0.590219	0.333968	3.90513	5.27377	2.38762	0.914798	1.44601	1.61017	1.39286	0.376426	0.95614	0.61194	0.130435	1.32994	1.30207	1.42361	1.2948	1.30392	1.72601	2.07552	1.85932	1.61291	1.6163	1.50198	1.63709	1.28864	1.23329	1.33532	1.24788
5.96137e-35	-2.96262	0.093	0.312	2.00874e-30	cTEC	Ctsc	-29.6971	0.113422	0.0911087	0.288265	1.02698	0.343245	1.04018	2.14499	1.36808	0.237668	3.53991	0.983051	3.68929	1.13308	0.5	1.53731	0.0434783	1.0675	1.05504	1.19604	1.58581	1.3464	1.23572	1.56713	1.63719	1.1868	2.13919	1.30603	2.48605	1.62374	1.14224	1.61904	1.05222
5.49317e-35	-1.61087	0.588	0.517	1.85098e-30	cTEC	Gsn	-29.7326	2.26276	10.2953	3.43878	21.3406	3.20861	0.84375	0.924947	1.76873	0.183857	0.690141	3.62712	0.853571	1.20913	0.0438596	117.91	0	1.72128	3.40853	2.55231	4.24018	2.65053	1.25645	1.26047	1.77876	1.14308	1.33802	1.94898	1.43527	1.66359	1.00932	6.43966	1
3.2894e-35	-1.6423	0.439	0.633	1.1084e-30	cTEC	Krt14	-29.9553	2.7448	8.69155	7.7551	1.76897	9.42626	17.673	5.70832	3.14902	0.273543	0.220657	0.254237	0.307143	0.307985	0.192982	1.47761	0.0434783	1.9787	3.1876	3.4683	1.97912	3.71026	3.00956	2.06932	2.13157	1.20234	1.12669	1.14339	1.19259	1.24669	1.06537	1.32701	1.08811
3.08715e-35	-1.76313	0.059	0.273	1.04025e-30	cTEC	Fhad1	-29.9829	0.243856	0.0175631	0.127551	0.0674536	0.076118	1.42411	5.21578	1.88925	0.29148	0.85446	0.0847458	0.367857	0.0722433	0.0701754	0.0447761	0	1.15903	1.0112	1.09512	1.03658	1.10492	1.33832	2.18301	1.8328	1.28446	1.37279	1.02566	1.20425	1.05857	1.01845	1.01213	1
2.73037e-35	-2.91868	0.119	0.299	9.20025e-31	cTEC	Utf1	-30.0362	0.230624	0.0208562	0.0459184	0.0556492	0.107279	15.8292	9.31684	1.54072	0.044843	0.112676	0.20339	0.410714	0.0608365	0.0175439	0.0149254	0.0434783	1.1122	1.01282	1.03942	1.02825	1.08767	2.81763	2.4495	1.59393	1.03108	1.06018	1.06587	1.18448	1.03316	1.00571	1.02485	1.15204
2.03336e-35	-2.41302	0.274	0.388	6.85162e-31	cTEC	Ankrd33b	-30.1642	0.514178	0.0834248	0.0688776	0.0674536	0.167222	9.38393	12.606	4.31922	0.421525	1.78873	0.423729	1.72857	0.273764	0.280702	0.0597015	0.130435	1.24528	1.04709	1.0702	1.03668	1.19096	2.42916	2.9861	2.41741	1.31244	1.73384	1.17069	2.02807	1.16666	1.13585	1.05288	1.17562
8.87814e-36	-3.27859	0.083	0.305	2.99158e-31	cTEC	Lrp1b	-30.5241	0.200378	0.0197585	0.170918	0.677909	1.35609	2.89621	2.72537	2.46254	0.219731	3.56808	0.0338983	0.135714	0.026616	0.649123	0.0149254	0.0869565	1.12006	1.01041	1.1535	1.44369	2.22043	1.78198	1.81812	2.0776	1.29047	2.25359	1.03153	1.13368	1.01943	1.23824	1.00543	1.14583
8.73183e-36	-1.96093	0.234	0.429	2.94228e-31	cTEC	Fas	-30.5313	0.412098	0.407245	0.528061	0.53457	0.324929	4.07589	5.4806	2.22068	0.829596	0.295775	0.186441	0.45	0.714829	0.175439	0.656716	0.478261	1.17993	1.21526	1.35274	1.28586	1.32417	1.74724	2.10483	1.86164	1.56683	1.13369	1.06677	1.25318	1.72805	1.04636	1.41721	1.65356
5.81986e-36	-2.53461	0.149	0.377	1.96106e-31	cTEC	Basp1	-30.7075	0.31758	0.0878156	1.97704	2.01349	0.955281	1.81027	2.64989	2.64088	3.26457	1.00469	0.186441	3.25714	2.0038	0.0175439	0.985075	0	1.1567	1.04759	1.95453	2.05582	1.74342	1.39638	1.69786	2.03304	2.42818	1.42029	1.08071	1.98935	1.99762	1.00344	1.47301	1
2.53151e-36	-2.46952	0.155	0.391	8.53018e-32	cTEC	Rgs5	-31.069	0.487713	0.0450055	0.17602	2.53794	1.94743	6.4442	2.83753	4.0171	2.01345	0.85446	0.0169492	0.0857143	0.0874525	0.0438596	4.1194	0.652174	1.24109	1.03074	1.14056	2.30142	2.28791	2.11388	1.69898	2.30196	2.35219	1.35761	1.01585	1.06755	1.11151	1.01826	3.02988	1.75245
1.99329e-36	-1.64272	0.267	0.508	6.71658e-32	cTEC	Arhgef3	-31.1729	0.627599	0.248079	1.01786	0.381113	0.769267	5.22098	3.96802	2.94381	1.09417	1.83568	1.40678	0.396429	0.634981	0.131579	0.61194	0.652174	1.32884	1.13235	1.66076	1.22784	1.84159	1.98013	2.08602	2.23326	1.86283	1.7365	1.41259	1.26961	1.53812	1.05491	1.44418	1.79152
1.85348e-36	-2.36831	0.206	0.45	6.24549e-32	cTEC	Csmd1	-31.2044	0.956522	0.713502	0.808673	4.3457	5.13701	9.60045	2.55053	1.37215	0.372197	1.3615	0.322034	4.95357	0.0836502	0.0964912	32.9254	0.0434783	1.55045	1.39463	1.53007	2.63494	3.53531	2.60946	1.85482	1.89747	1.36623	1.5718	1.21155	2.36218	1.08403	1.03271	5.09867	1.05969
1.52436e-36	-2.18691	0.166	0.413	5.1365e-32	cTEC	Tbc1d1	-31.2893	0.236295	0.188804	0.92602	0.244519	0.629163	1.5	1.2209	1.06433	0.825112	1.92019	0.830508	1.05714	0.988593	9.20175	0.283582	0.304348	1.13735	1.12361	1.569	1.1485	1.67482	1.39323	1.41422	1.59818	1.65059	1.79889	1.24562	1.57885	1.69452	2.76085	1.24146	1.37227
9.04107e-37	-1.75971	0.346	0.566	3.04648e-32	cTEC	Gm15987	-31.5162	0.820416	0.0922064	1.06122	0.236088	1.42578	5.56696	4.65288	3.9658	2.39462	0.699531	0.389831	3.66429	0.365019	0.0701754	0	0.0434783	1.41307	1.05273	1.74752	1.17387	2.25087	2.04434	2.16174	2.50255	2.47782	1.29709	1.14734	2.51373	1.20129	1.01561	1	1.08049
8.46402e-37	-2.77178	0.083	0.3	2.85204e-32	cTEC	Sting1	-31.5448	0.10397	0.064764	0.125	0.112985	0.133206	2.44754	2.36375	0.977199	0.295964	0.798122	0.610169	0.142857	0.155894	0.192982	0.283582	0.26087	1.04136	1.03546	1.08153	1.06519	1.10915	1.4861	1.56019	1.40223	1.20501	1.33123	1.23512	1.0749	1.10675	1.04644	1.13203	1.39197
5.27358e-37	-2.3577	0.161	0.407	1.77698e-32	cTEC	Slc9a7	-31.7503	0.291115	0.0461032	0.739796	0.153457	0.28568	2.64732	3.74115	3.10749	1.713	1.23474	0.745763	1.08571	0.254753	0.324561	0.0149254	0	1.145	1.03217	1.49597	1.10672	1.3562	1.59716	2.01753	2.22514	2.0948	1.57353	1.26133	1.56902	1.18844	1.08984	1.00539	1
4.45283e-37	-2.32214	0.174	0.395	1.50043e-32	cTEC	Ogfrl1	-31.8238	0.332703	0.240395	0.132653	0.136594	0.280447	5.69978	7.54499	2.16531	0.690583	0.694836	0.728814	0.5	0.38403	0.280702	0.164179	0.0869565	1.15407	1.14779	1.08752	1.08162	1.24678	1.96691	2.38194	1.809	1.37554	1.32831	1.24897	1.20602	1.19001	1.07764	1.11215	1.10223
3.80333e-37	-2.78047	0.051	0.268	1.28157e-32	cTEC	C1qtnf6	-31.8923	0.0586011	0.0120746	0.0306122	0.0505902	0.119648	2.04576	1.63966	0.490228	0.269058	0.164319	0.118644	0.175	0.0342205	0.114035	1.01493	0	1.03114	1.00868	1.03042	1.03244	1.12318	1.43506	1.43161	1.22775	1.2101	1.08552	1.03727	1.10115	1.04575	1.0276	1.39819	1
1.44538e-37	-3.54335	0.06	0.275	4.87035e-33	cTEC	Gpx3	-32.3124	0.177694	0.411636	0.877551	0.892074	2.77355	0.210938	1.99446	0.767101	0.0224215	4.98592	2.05085	0.182143	0.0190114	0.00877193	2.04478	0.0434783	1.10066	1.22781	1.59277	1.60479	2.46316	1.06242	1.54108	1.3879	1.02273	2.53957	1.82774	1.12514	1.02811	1.00199	1.89153	1.05222
1.21265e-37	-1.27515	0.592	0.657	4.08614e-33	cTEC	Ccser2	-32.3887	1.33459	0.815587	0.790816	0.799325	1.51475	8.78683	7.35224	1.86238	0.798206	1.94836	2.11864	1.48571	0.414449	0.45614	1.0597	0.391304	1.55895	1.41523	1.50365	1.4257	2.22726	2.39733	2.46786	1.87021	1.64653	1.7819	1.61856	1.67204	1.41387	1.11661	1.62992	1.5383
1.06006e-37	-3.11048	0.089	0.32	3.57197e-33	cTEC	Zbtb7c	-32.4471	0.130435	0.0559824	0.288265	0.220911	0.649857	1.42857	0.721535	1.14902	0.412556	0.389671	1.08475	0.589286	0.00760456	0.491228	1.44776	0.0434783	1.06334	1.03415	1.18571	1.18795	1.73315	1.37205	1.28013	1.6589	1.40656	1.19407	1.32029	1.3752	1.00546	1.21761	1.5728	1.07333
9.24069e-38	-1.32489	0.516	0.531	3.11374e-33	cTEC	Bmp2k	-32.5067	1.03403	0.396268	0.40051	0.435076	0.471218	8.71094	7.57868	3.32166	4.74439	1.62911	0.474576	0.782143	1.01141	0.184211	0.41791	0.0869565	1.42963	1.2225	1.28941	1.22195	1.46973	2.3193	2.46796	2.23071	3.20584	1.64843	1.17656	1.44365	1.63999	1.04585	1.24469	1.10412
8.78742e-38	-3.33498	0.051	0.263	2.96101e-33	cTEC	Gdpd1	-32.5286	0.0661626	0.00768386	0.234694	0.27656	0.0820647	3.11272	1.93646	0.789088	0.278027	1.34742	0.457627	1.32143	0.148289	10.9474	0.0746269	0.0869565	1.03196	1.00568	1.15192	1.14701	1.09402	1.6002	1.48987	1.40672	1.21352	1.54764	1.14494	1.58256	1.14714	2.73135	1.04682	1.19187
8.48002e-38	-3.26815	0.045	0.257	2.85743e-33	cTEC	Tjp3	-32.544	0.0491493	0.01427	0.765306	0.158516	0.0487631	1.38393	0.802132	1.00326	0.704036	0.934272	1.08475	0.617857	0.0722433	0.22807	0	0	1.02241	1.00666	1.48248	1.07878	1.0701	1.31672	1.23345	1.53672	1.57668	1.42316	1.35096	1.3875	1.05952	1.05727	1	1
5.94111e-38	-1.10355	0.567	0.674	2.00192e-33	cTEC	Psmb8	-32.6986	1.84499	2.04501	4.34949	2.43339	1.37488	5.69978	7.65117	6.34365	3.50224	4.74178	3.94915	1.53214	3.42966	0.342105	2.19403	1.73913	1.65228	1.88357	2.57368	2.06504	1.87482	1.99349	2.39202	2.67829	2.32752	2.39454	2.11391	1.68028	2.3257	1.0841	1.97398	2.58842
4.62848e-38	-3.92134	0.049	0.262	1.55961e-33	cTEC	S100g	-32.807	0.100189	0.0241493	0.257653	0.148398	0.0501903	2.31027	9.42814	6.65147	0.713004	2.95775	1.55932	0.535714	0.0152091	0.0526316	0	0	1.0623	1.01755	1.13527	1.06136	1.07132	1.45378	2.5446	2.63988	1.46567	1.89645	1.74634	1.19391	1.00913	1.01281	1	1
1.80725e-38	-1.86475	0.507	0.555	6.0897e-34	cTEC	Ubd	-33.2154	3.61059	0.207464	0.625	0.231029	1.19481	24.1105	55.8	42.1254	23.0538	4.46009	0.644068	0.496429	0.250951	0.315789	0.0746269	0.130435	2.20936	1.11941	1.31259	1.16774	1.88481	3.34158	4.69942	4.97674	4.52807	2.32004	1.2453	1.32226	1.27582	1.06993	1.05327	1.26443
1.61295e-38	-1.72389	0.257	0.509	5.43501e-34	cTEC	Swap70	-33.2648	0.455577	0.178924	0.293367	0.177066	1.02212	3.35379	2.90576	1.76303	1.92825	0.615023	0.322034	1.12143	0.760456	0.535088	0.41791	0.652174	1.25504	1.09659	1.23335	1.10011	1.91953	1.66811	1.78467	1.74884	2.20428	1.30782	1.10492	1.49807	1.46378	1.16215	1.18167	1.78326
7.73084e-39	-2.46659	0.113	0.361	2.60498e-34	cTEC	Elk3	-33.5842	0.149338	0.129528	0.67602	0.305228	0.641056	1.02679	0.994456	0.484528	0.390135	0.342723	0.0847458	0.175	0.429658	0.219298	0.835821	1.43478	1.08788	1.07112	1.42822	1.18263	1.69807	1.26548	1.3037	1.29028	1.44944	1.18193	1.02184	1.11628	1.42016	1.05519	1.35525	2.28214
3.86904e-39	-2.58183	0.079	0.315	1.30371e-34	cTEC	Igsf8	-33.8848	0.120983	0.200878	0.140306	0.266442	0.0989534	1.78906	2.53646	1.85179	0.434978	1.1784	0.779661	1.26786	0.231939	0.131579	0.656716	0.130435	1.05987	1.1158	1.08912	1.15539	1.09157	1.38325	1.63326	1.67312	1.26724	1.49086	1.27091	1.54238	1.12331	1.03903	1.37951	1.27782
3.64029e-39	-2.95326	0.13	0.359	1.22663e-34	cTEC	Cystm1	-33.9113	0.234405	0.139407	0.936224	1.61046	0.0440057	1.33259	3.47761	3.34935	1.02691	7.71362	8.15254	7.25357	0.190114	2.77193	0.880597	0.130435	1.08855	1.06819	1.45154	1.70718	1.04838	1.29706	1.79765	2.13482	1.66932	2.89007	2.58297	2.94297	1.16055	1.64198	1.74012	1.18188
3.36158e-39	-2.17338	0.321	0.512	1.13272e-34	cTEC	Ralgapa2	-33.9459	0.52552	0.493963	0.772959	0.350759	0.47883	3.60938	7.55522	4.59365	0.632287	2.84038	5.27119	3.71786	1.10646	0.736842	0.38806	0.173913	1.27647	1.29957	1.51859	1.20852	1.55319	1.73326	2.56862	2.59721	1.52459	2.07913	2.21511	2.53796	1.78193	1.26562	1.2796	1.16964
2.88668e-39	-2.45743	0.187	0.422	9.72695e-35	cTEC	Ank	-34.012	0.345936	0.511526	1.35969	0.645868	0.16627	3.92634	6.58465	2.21336	0.399103	2.28638	0.186441	5.33571	0.171103	0.657895	0.626866	0.130435	1.16421	1.29679	1.76467	1.30578	1.2152	1.7523	2.40807	1.9218	1.30855	1.9052	1.07341	2.80188	1.10868	1.21243	1.26887	1.12201
1.06388e-39	-1.73399	0.261	0.532	3.58484e-35	cTEC	Mndal	-34.4455	0.514178	0.26674	1.95408	0.625632	1.16009	3.7779	2.32409	1.89414	1.69058	1.2723	1.42373	0.185714	1.15589	0.0526316	1.74627	1.43478	1.29244	1.16434	2.0968	1.42326	2.0464	1.7354	1.63421	1.8891	2.15874	1.56116	1.47944	1.1607	1.74941	1.01367	1.72988	2.31818
9.03316e-40	-3.47968	0.042	0.255	3.04381e-35	cTEC	Rab32	-34.5166	0.047259	0.0274424	0.0994898	0.104553	0.085157	1.86384	1.25203	0.733713	1.10314	0.150235	0.135593	0.125	0.0988593	0.00877193	0.149254	0	1.01786	1.01544	1.07718	1.07489	1.08584	1.38876	1.33715	1.36201	1.77621	1.06605	1.05999	1.07454	1.04212	1.00382	1.11907	1
7.05669e-40	-2.84712	0.066	0.302	2.37782e-35	cTEC	Klf12	-34.6238	0.119093	0.039517	0.397959	0.20742	0.50999	1.29576	1.38465	0.596906	0.215247	4.13615	0.118644	0.325	0.0532319	0.526316	0.776119	0.478261	1.06717	1.02236	1.25366	1.15982	1.56289	1.3515	1.48718	1.32248	1.20707	2.36085	1.0405	1.18487	1.04675	1.23815	1.29874	1.74369
5.52104e-40	-3.54109	0.043	0.263	1.86037e-35	cTEC	Ikzf1	-34.7304	0.0623819	0.0230516	0.0510204	0.0151771	0.129401	3.44196	1.73945	0.749186	0.748879	0.056338	0.0338983	0.2	2.31559	0	0.0149254	0.0434783	1.03263	1.01534	1.04371	1.01013	1.16022	1.72649	1.54732	1.41928	1.68856	1.02284	1.01665	1.17538	2.52444	1	1.00356	1.10201
3.05583e-40	-1.02646	0.709	0.542	1.02969e-35	cTEC	Anxa1	-34.9873	3.28355	4.3315	17.9515	5.4199	4.23192	1.94196	1.28273	6.21498	0.192825	1.1784	23.1356	7.20714	0.532319	0.54386	5.20896	0.391304	2.01443	2.48773	4.28048	2.72742	2.99584	1.46241	1.39545	2.86856	1.23591	1.45233	3.77702	2.56464	1.27359	1.14119	2.69062	1.4405
1.20209e-40	-1.96359	0.178	0.451	4.05056e-36	cTEC	Rgs17	-35.3925	0.41966	0.0351262	0.255102	0.084317	0.865366	3.47098	5.52367	1.38274	0.488789	1.68545	0.20339	0.439286	0.0228137	0.464912	0.208955	0.0434783	1.21548	1.02654	1.22121	1.0514	1.76256	1.69406	2.17128	1.63048	1.42881	1.67021	1.09958	1.1871	1.01494	1.16361	1.12538	1.05222
8.33227e-41	-4.18818	0.053	0.262	2.80764e-36	cTEC	Gm43569	-35.5517	0.0567108	0.0482986	0.0484694	0.0269815	0.0399619	1.44085	5.57015	1.01384	0.313901	0.084507	0.135593	0.221429	0.0304183	0.0350877	0.0298507	0	1.02363	1.0266	1.04146	1.01117	1.03989	1.31637	2.15378	1.43164	1.23281	1.04072	1.0578	1.1566	1.0289	1.01322	1.01475	1
8.13304e-41	-2.4407	0.242	0.461	2.74051e-36	cTEC	Ero1b	-35.5622	0.353497	0.150384	0.298469	0.197302	0.457897	3.91406	6.03113	3.04805	2.75336	8.68545	1.54237	6.90714	0.463878	0.394737	0.0895522	0	1.20806	1.08375	1.24735	1.11099	1.52078	1.79453	2.3479	2.23426	2.56649	3.03952	1.45507	3.03181	1.28385	1.14764	1.11341	1
1.50203e-41	-2.53078	0.085	0.339	5.06124e-37	cTEC	Epsti1	-36.2957	0.130435	0.0581778	0.795918	0.106239	0.371551	1.95089	1.75608	1.47476	0.7713	0.624413	0.779661	0.396429	2.79468	0.0350877	0	0.0434783	1.08069	1.03951	1.49877	1.07319	1.36714	1.43076	1.46695	1.66069	1.51451	1.28552	1.29208	1.24733	2.38366	1.0082	1	1.06095
1.28829e-41	-1.62694	0.565	0.551	4.34102e-37	cTEC	Tkt	-36.3624	1.38374	0.937431	1.13776	2.43676	0.356089	7.3058	16.5539	5.93648	1.27354	1.60094	3.27119	0.589286	1.1673	0.780702	1.34328	0.391304	1.47398	1.4493	1.61364	1.91473	1.31011	2.15157	3.16103	2.53707	1.7583	1.61342	1.82837	1.31849	1.58448	1.20656	1.61777	1.45812
5.5923e-42	-3.15242	0.078	0.315	1.88438e-37	cTEC	Ckmt1	-36.7248	0.113422	0.0691548	0.635204	0.172007	0.038059	1.45647	4.19915	1.91124	0.55157	1.59155	11.661	1.55	0.00760456	0.236842	0	0	1.05188	1.04061	1.38988	1.07975	1.04163	1.314	1.89548	1.71765	1.46186	1.63423	3.09339	1.81345	1.00707	1.06162	1	1
4.43358e-42	-4.79036	0.045	0.276	1.49394e-37	cTEC	Pglyrp1	-36.8257	0.0756144	0.0439078	6.57908	0.0556492	0.0418649	1.62723	3.74371	3.89414	36.4709	2.79343	0.576271	0.703571	0.0798479	0.0614035	0.0298507	0	1.04433	1.02678	2.89489	1.03077	1.04915	1.35581	1.8733	2.33913	5.52281	1.93859	1.24439	1.29943	1.05631	1.01422	1.01415	1
2.2565e-42	-2.80299	0.138	0.38	7.60351e-38	cTEC	Gbp8	-37.119	0.175803	0.322722	0.285714	0.129848	0.180304	1.04018	4.01535	1.91694	2.60987	0.812207	0.627119	0.167857	0.798479	0.0175439	0.164179	0.130435	1.08482	1.17855	1.17785	1.07783	1.22935	1.24046	1.97133	1.8661	2.56138	1.40192	1.21527	1.15394	1.6917	1.00477	1.09269	1.20769
1.49153e-42	-1.1033	0.618	0.672	5.02586e-38	cTEC	Prpf38b	-37.2988	1.20983	0.930845	0.966837	1.14334	0.913654	7.01562	4.89979	2.83225	2.89686	2.14085	2.0678	3.275	1.25475	1.19298	1	0.304348	1.52141	1.45735	1.63005	1.55199	1.8782	2.15778	2.08008	2.17611	2.62445	1.85892	1.59443	2.4557	1.91113	1.3242	1.52509	1.4461
6.70907e-43	-2.47631	0.157	0.421	2.26069e-38	cTEC	Arhgef28	-37.6458	0.238185	0.216246	1.125	0.202361	0.565414	2.12612	1.62857	0.941368	0.802691	4.85915	5.18644	3.63214	0.0228137	0.0263158	0.164179	0.347826	1.11913	1.12786	1.63517	1.10886	1.62304	1.50052	1.5141	1.54599	1.70732	2.50545	2.1656	2.54607	1.01808	1.00622	1.07493	1.49529
3.45594e-43	-1.83067	0.535	0.482	1.16451e-38	cTEC	Nsmce1	-37.9339	1.03403	0.762898	0.464286	0.951096	0.297574	6.8404	18.3736	3.18404	2.26457	0.732394	1.16949	1.23929	0.475285	1.21053	0.552239	0.347826	1.38202	1.37383	1.30421	1.43438	1.25246	2.05766	3.22519	2.00924	2.1157	1.33427	1.38364	1.51682	1.32398	1.28157	1.31019	1.44224
2.16348e-43	-1.25018	0.639	0.463	7.29006e-39	cTEC	Apoe	-38.1373	5.02457	33.0889	12.9413	9.38954	8.6558	1.44978	0.791045	1.6759	0.408072	1.6385	1.22034	0.492857	0.235741	0.131579	37.9104	3.56522	2.31851	4.90743	4.16752	3.49729	3.54418	1.36801	1.2695	1.66128	1.26022	1.60247	1.43048	1.43055	1.18591	1.06325	5.21658	3.32693
1.46624e-43	-2.15344	0.251	0.487	4.94065e-39	cTEC	Ccdc88a	-38.3062	0.446125	0.418222	0.122449	0.505902	0.409848	4.40737	5.68486	2.75407	1.13004	3.00939	1.18644	1.14286	0.980989	0.701754	1.1791	0.608696	1.20779	1.23378	1.09081	1.2931	1.46616	1.85168	2.30556	2.0896	1.70175	2.07227	1.39652	1.6462	1.4227	1.18558	1.54714	1.94676
7.14171e-44	-2.9183	0.096	0.333	2.40647e-39	cTEC	Rap1gap	-38.6186	0.119093	0.0373216	0.283163	0.0286678	0.0875357	4.08594	4.20725	0.952769	1.61883	0.953052	0.20339	0.385714	0.0418251	0.0789474	0.0149254	0	1.0615	1.02047	1.18052	1.01319	1.11619	1.75498	1.9091	1.43738	2.19013	1.4684	1.08721	1.26853	1.04745	1.01985	1.00496	1
6.37366e-44	-2.84251	0.07	0.324	2.14767e-39	cTEC	Cacna1b	-38.668	0.0869565	0.0120746	0.0127551	0.0455312	0.245718	1.61049	2.63497	1.35668	0.932735	0.85446	0.0508475	0.342857	0.026616	0.0175439	0.0298507	0	1.06597	1.00715	1.00987	1.03117	1.32386	1.3923	1.77323	1.66743	1.80024	1.43647	1.02116	1.25236	1.01945	1.0039	1.01958	1
2.42424e-44	-2.87756	0.125	0.376	8.16874e-40	cTEC	Sh3tc2	-39.0878	0.177694	0.148189	0.34949	0.129848	0.181732	5.09933	4.87633	2.07736	0.699552	0.521127	0.0508475	0.375	0.0304183	0.0263158	0.104478	0.130435	1.09839	1.09387	1.29072	1.07759	1.23223	1.99951	2.20166	1.9233	1.66766	1.23084	1.01635	1.28522	1.04542	1.00728	1.11704	1.13033
1.14028e-44	-2.12372	0.282	0.543	3.84228e-40	cTEC	Dapk2	-39.4154	0.497164	0.365532	1.07398	0.519393	1.76855	2.67857	1.59915	1.59935	3.6009	0.619718	0.338983	1.23214	0.148289	0.0263158	0.552239	0.521739	1.24806	1.21217	1.64759	1.27318	2.32694	1.5701	1.44771	1.72098	2.81154	1.28128	1.12776	1.52451	1.1118	1.00814	1.3299	1.76068
8.45517e-45	-2.27865	0.123	0.392	2.84905e-40	cTEC	Rab25	-39.5453	0.228733	0.121844	1.35714	1.15683	0.125833	2.85603	3.07719	1.54805	0.798206	1.46479	3.66102	2.57857	0.0380228	2.2193	0.0597015	0	1.09519	1.07164	1.68946	1.48717	1.12139	1.54847	1.69382	1.60048	1.48714	1.60648	1.93007	1.96434	1.02294	1.48989	1.02571	1
7.49963e-45	-3.91881	0.036	0.267	2.52707e-40	cTEC	Tbc1d4	-39.5974	0.0586011	0.064764	0.72449	0.36425	0.0723121	2.08594	4.53945	0.62785	0.282511	0.671362	1.49153	0.182143	1.05323	0.219298	0.343284	0.0434783	1.02775	1.03718	1.45718	1.21815	1.10885	1.42661	1.94797	1.28819	1.28405	1.28398	1.442	1.15222	1.53944	1.07529	1.18459	1.05394
2.74875e-45	-3.37545	0.055	0.304	9.26218e-41	cTEC	Gda	-40.0333	0.0718336	0.308452	0.0994898	0.0303541	0.128449	1.98661	1.84094	1.7614	4.26009	0.084507	0	0.589286	0	0.0175439	0.373134	0.434783	1.04137	1.17214	1.08344	1.01648	1.15182	1.44925	1.52521	1.82887	2.97313	1.04326	1	1.34026	1	1.00383	1.20653	1.6892
1.43641e-45	-2.97219	0.191	0.361	4.84013e-41	cTEC	H2-Eb2	-40.3151	0.311909	0.296378	0.0663265	0.0421585	0.107041	6.67857	14.4597	3.54886	0.70852	0.934272	0.0338983	0.114286	0.140684	0.0526316	0	0.0434783	1.14021	1.15298	1.06412	1.0254	1.09221	2.03862	2.96109	2.00465	1.38488	1.39453	1.01403	1.09179	1.09229	1.0117	1	1.05969
7.64627e-46	-2.71158	0.112	0.391	2.57649e-41	cTEC	Clca3a2	-40.589	0.296786	0.100988	0.742347	0.244519	2.08135	4.4375	1.38934	2.56352	1.07623	1.84038	5.74576	0.775	0.106464	0.0526316	0.0597015	0	1.18565	1.07443	1.54383	1.15234	2.42779	1.84571	1.40126	2.06789	1.84511	1.68107	2.24793	1.29765	1.15787	1.01193	1.04958	1
7.45086e-46	-4.26173	0.053	0.284	2.51064e-41	cTEC	Bcl2a1d	-40.6002	0.0850662	0.0208562	0.0510204	0.0252951	0.249762	7.73996	6.99104	6.99593	11	0.183099	0.0169492	0.128571	1.61597	0.00877193	0.0298507	0	1.05713	1.0182	1.04931	1.01499	1.1777	2.19244	2.32517	2.7405	3.5494	1.08473	1.00557	1.08721	1.51011	1.00143	1.01223	1
3.62112e-46	-2.8517	0.066	0.321	1.22017e-41	cTEC	Snx8	-40.9136	0.0812854	0.0493963	0.0943878	0.0775717	0.0861085	3.49554	3.67719	1.03909	0.421525	0.366197	0.135593	0.264286	0.190114	0.22807	0.149254	0	1.05736	1.02588	1.07063	1.05505	1.10548	1.67092	1.875	1.50844	1.38744	1.20131	1.04803	1.13374	1.078	1.07978	1.09034	1
3.1272e-46	-1.27171	0.681	0.553	1.05374e-41	cTEC	S100a14	-40.9773	4.26654	0.668496	1.59184	1.0742	0.774263	38.0413	49.5731	12.6099	0.757848	2.76526	0.711864	1.26429	0.129278	0.289474	0.134328	0.130435	2.18468	1.34088	1.78928	1.45349	1.55819	3.85621	4.42913	3.25784	1.53824	1.9424	1.25744	1.47312	1.10177	1.05945	1.05366	1.25247
2.58081e-46	-4.26957	0.03	0.261	8.69631e-42	cTEC	Pglyrp2	-41.0607	0.0321361	0.0428101	0.0102041	0.00674536	0.0333016	2.53795	3.21663	3.11564	2.58744	0.107981	0.0169492	0.0107143	0.136882	0.00877193	0	0	1.02326	1.02125	1.0075	1.00273	1.03591	1.50553	1.75201	2.11306	2.35638	1.04483	1.00687	1.01448	1.14436	1.00208	1	1
2.30093e-46	-3.0128	0.096	0.365	7.75322e-42	cTEC	Skint4	-41.1105	0.136106	0.0109769	0.0637755	0.00674536	0.16746	3.13281	4.58252	4.06922	4.84753	0.366197	0.0677966	0.432143	0.0456274	0.00877193	0	0	1.10321	1.00606	1.05862	1.00517	1.19811	1.62798	2.11927	2.56514	3.16309	1.13328	1.021	1.31974	1.04222	1.00269	1	1
1.86918e-46	-3.46491	0.06	0.298	6.2984e-42	cTEC	Icosl	-41.2008	0.0623819	0.109769	0.0867347	0.0539629	0.0675547	4.79799	3.54584	0.7557	0.170404	0.258216	0.0677966	0.103571	0.201521	0.0263158	0.0447761	0	1.03361	1.06754	1.07503	1.03538	1.07084	1.84635	1.79508	1.39102	1.14241	1.13027	1.04528	1.06648	1.13019	1.01155	1.01786	1
1.14625e-46	-3.66868	0.053	0.301	3.86241e-42	cTEC	Gm6999	-41.4131	0.109641	0.0274424	0.0127551	0.0168634	0.0901522	7.03237	8.41493	2.65635	0.524664	0.460094	0.0508475	3.36429	0.0304183	0.00877193	0.0298507	0	1.0804	1.01884	1.0154	1.00973	1.10818	2.2425	2.72471	2.09228	1.38427	1.22217	1.03473	1.97822	1.02717	1.00248	1.01558	1
9.40863e-47	-3.18733	0.134	0.392	3.17033e-42	cTEC	Dpp10	-41.4989	0.389414	0.611416	0.454082	0.548061	0.267602	11.721	16.4256	7.79235	17.0314	1.67136	0.101695	1.08214	0.144487	0.0701754	0.0149254	0	1.25914	1.42306	1.22348	1.21159	1.31332	2.70578	3.47009	3.13816	4.6671	1.83445	1.02205	1.51776	1.14286	1.03497	1.00837	1
4.28166e-47	-5.69398	0.083	0.31	1.44275e-42	cTEC	Csn2	-41.8408	0.0850662	0.090011	0.0688776	0.06914	0.0953853	2.55246	30.1783	11.1376	29.2242	0.868545	0.135593	0.557143	0.0532319	0.0964912	0.0149254	0.0869565	1.05184	1.05752	1.05957	1.04298	1.10955	1.51132	3.9266	3.12264	4.5761	1.36034	1.05401	1.22243	1.04661	1.03593	1.00759	1.17012
3.34118e-47	-1.79315	0.558	0.625	1.12584e-42	cTEC	Nsmce2	-41.9485	1.1172	0.937431	1.2551	1.07251	0.563749	9.32701	11.322	7.4829	8.83408	2.88263	1.59322	0.867857	1.06464	1.39474	0.776119	0.0434783	1.48527	1.47416	1.78332	1.54975	1.58701	2.38985	2.828	3.1328	3.68623	1.93173	1.53003	1.46109	1.76713	1.44395	1.49797	1.08258
2.4278e-47	-2.19852	0.231	0.505	8.18072e-43	cTEC	Pcgf5	-42.0872	0.36673	0.305159	0.673469	0.3457	0.632255	2.53237	4.26354	2.01954	2.48879	1.77465	0.644068	1.14286	1.57795	0.412281	0.223881	0.217391	1.19064	1.18386	1.46541	1.22119	1.64041	1.55735	2.04227	1.88753	2.48224	1.66766	1.23971	1.74622	2.07048	1.14414	1.11702	1.30749
2.29819e-47	-4.15525	0.026	0.26	7.74398e-43	cTEC	Itgb8	-42.111	0.0302457	0.0274424	0.173469	0.178752	0.152236	0.784598	1.62175	1.60423	1.29596	1.03286	0.135593	0.782143	0.0228137	0.0263158	0.373134	0	1.02027	1.01835	1.12234	1.11553	1.19885	1.19553	1.50978	1.79972	1.94708	1.4041	1.05002	1.53916	1.0154	1.01869	1.32337	1
3.45093e-48	-3.66325	0.03	0.271	1.16283e-43	cTEC	Ncf4	-42.9345	0.0396975	0.00987925	0.0892857	0.0084317	0.0292578	1.52679	2.69893	1.66205	0.829596	0.591549	0.338983	0.114286	0.155894	0.00877193	0.0447761	0.0434783	1.0227	1.00889	1.05691	1.00688	1.02776	1.32396	1.6339	1.65267	1.57881	1.23952	1.1749	1.07492	1.06999	1.00303	1.02207	1.06095
3.2288e-48	-3.80882	0.03	0.265	1.08798e-43	cTEC	Gm48239	-42.9634	0.0756144	0.0241493	0.0331633	0.0168634	0.02902	3.4442	9.18465	2.64658	0.121076	0.0751174	0.0508475	0.0607143	0.0228137	0.0263158	0	0	1.05091	1.01869	1.03087	1.00885	1.03926	1.63542	2.51031	1.91778	1.10578	1.0333	1.01726	1.05065	1.02718	1.00552	1	1
2.65925e-48	-2.7875	0.093	0.369	8.9606e-44	cTEC	Kctd12	-43.0477	0.168242	0.064764	0.678571	0.202361	0.40628	2.14621	2.60554	1.86971	1.49776	6.06103	3.37288	3.83214	0.338403	0.184211	1.32836	0.608696	1.09657	1.03904	1.40623	1.12661	1.44835	1.46926	1.68798	1.85522	2.04438	2.5941	1.94546	2.28231	1.20443	1.05913	1.54068	1.69304
2.78986e-49	-4.46955	0.034	0.272	9.40073e-45	cTEC	Rac2	-44.0268	0.0623819	0.0439078	0.0306122	0.0269815	0.02902	3.36496	4.61279	3.40554	4.07623	0.887324	0.118644	1.1	2.79468	0.00877193	0.0149254	0	1.02658	1.02617	1.02056	1.0138	1.04508	1.62573	1.91773	2.0653	2.46531	1.3477	1.04794	1.53399	2.45523	1.00179	1.02356	1
5.76547e-50	-4.27071	0.081	0.348	1.94273e-45	cTEC	Hdac9	-44.7116	0.215501	0.0472009	0.0331633	0.079258	0.293768	3.93973	10.6977	10.4169	3.81614	6.9061	0.101695	1.72143	0.235741	0.0877193	1.07463	0.0869565	1.09849	1.03207	1.03035	1.05988	1.33057	1.873	3.07203	3.42819	2.91951	2.95952	1.05897	1.86135	1.16578	1.01684	1.69313	1.14021
3.43735e-51	-3.26297	0.081	0.36	1.15825e-46	cTEC	Plagl1	-45.9362	0.134216	0.18112	0.47449	0.187184	0.254995	2.125	3.43881	2.55456	2.05381	1.8216	1.30508	1.25714	0.0532319	0.280702	0.253731	0	1.07056	1.1054	1.33187	1.09627	1.32752	1.47312	1.92518	2.11891	2.22815	1.71937	1.42003	1.55489	1.06376	1.09935	1.08549	1
1.59676e-51	-1.41748	0.709	0.736	5.38043e-47	cTEC	Magi1	-46.2692	2.44234	0.778266	3.11224	1.30523	2.41127	16.0246	17.162	7.31678	5.39013	8.23474	14.1356	4.21786	0.30038	1.42105	0.373134	2.69565	2.00667	1.43219	2.40759	1.63919	2.71702	3.07765	3.56179	3.11005	3.22634	3.06079	3.13366	2.69687	1.25627	1.50834	1.24065	2.88044
6.74017e-52	-4.43414	0.025	0.271	2.27117e-47	cTEC	Insm1	-46.6438	0.0396975	0.00987925	0.0153061	0.0118044	0.0535205	9.48661	5.17996	2.16124	0.408072	4.93897	0.0677966	0.4	0.0342205	0.0263158	0	0	1.02767	1.00645	1.01053	1.00556	1.05646	2.3327	2.00413	1.76217	1.29524	2.40929	1.04246	1.12058	1.02407	1.00591	1	1
4.04936e-52	-4.85947	0.023	0.264	1.36447e-47	cTEC	Tm4sf5	-46.865	0.0226843	0.0109769	0.0204082	0.0134907	0.0233111	2.53125	4.09979	1.58306	1.83857	0.0985915	0	0.117857	0.34981	0.0438596	0.0149254	0	1.01226	1.0088	1.01342	1.00776	1.02861	1.48646	1.86155	1.58056	1.98216	1.05509	1	1.05467	1.16088	1.01079	1.00483	1
3.14498e-52	-1.33115	0.65	0.55	1.05973e-47	cTEC	Ifi30	-46.9748	1.79206	0.811196	0.548469	1.00169	0.742864	22.2824	17.5569	4.46906	2.83408	1.01878	2.40678	1.30714	4.44106	0.614035	0.970149	0.0869565	1.63263	1.41293	1.34648	1.46508	1.53361	3.17473	3.16035	2.27417	2.21091	1.40162	1.66376	1.42005	2.11947	1.16879	1.4297	1.14755
2.60751e-52	-4.15632	0.028	0.279	8.78626e-48	cTEC	Muc1	-47.0562	0.0434783	0.0120746	0.482143	0.0118044	0.041627	2.21987	4.0162	1.63518	0.345291	1.07981	0.322034	0.0571429	0.0152091	0.0175439	0	0.0434783	1.02095	1.00845	1.27602	1.00841	1.04746	1.4625	1.86068	1.62036	1.23481	1.45691	1.12045	1.0411	1.01156	1.00536	1	1.02566
2.52496e-52	-2.20813	0.117	0.424	8.50809e-48	cTEC	Ifi211	-47.0702	0.206049	0.0998902	0.706633	0.256324	0.651522	4.21652	3.16674	2.20684	0.376682	0.478873	0.254237	0.1	0.18251	0.0263158	0.835821	0.0869565	1.13795	1.05964	1.43365	1.17997	1.55482	1.77963	1.73645	1.83203	1.26799	1.21055	1.1112	1.07217	1.0941	1.00753	1.38692	1.10428
7.42708e-54	-5.1089	0.03	0.284	2.50263e-49	cTEC	Spock3	-48.6016	0.0510397	0.0219539	0.0510204	0.0134907	0.0378211	6.33705	6.50661	7.31515	3.2287	14.5164	0.983051	0.792857	0.224335	0.0263158	0.0298507	0	1.03303	1.01674	1.0381	1.00561	1.04867	2.06262	2.36605	2.88416	2.58461	3.61048	1.36121	1.46507	1.09042	1.00693	1.01221	1
5.02569e-54	-2.21637	0.293	0.564	1.69346e-49	cTEC	Tnfrsf11a	-48.7712	0.627599	0.0548847	0.630102	0.131535	1.25523	7.72433	6.13987	3.9943	5.94619	1.57277	0.423729	0.6	0.231939	0.0701754	0.0447761	0.0869565	1.30753	1.03843	1.39855	1.09915	2.10859	2.30182	2.32951	2.42072	3.29133	1.63756	1.15742	1.38515	1.17323	1.02825	1.02688	1.1056
1.60051e-54	-3.19786	0.113	0.374	5.39308e-50	cTEC	Ctss	-49.2682	0.15879	0.0296378	0.709184	0.0775717	0.189106	5.10603	7.29168	2.45114	0.932735	2.11268	0.559322	0.114286	2.4981	0.0350877	0.104478	0	1.07988	1.0193	1.39424	1.05317	1.1705	1.86271	2.29884	1.85889	1.50151	1.68541	1.25272	1.05656	1.75774	1.01026	1.04962	1
4.10227e-55	-2.45132	0.147	0.467	1.3823e-50	cTEC	Ifi203	-49.8594	0.279773	0.153677	1.30102	0.455312	1.07564	3.1808	2.19062	1.42264	0.430493	0.671362	0.949153	0.0821429	0.51711	0.0438596	1.85075	1.17391	1.15953	1.11192	1.8146	1.32808	2.02218	1.65649	1.60146	1.6746	1.36503	1.28573	1.33129	1.07073	1.3549	1.01274	1.83805	2.15931
2.13765e-55	-4.55857	0.042	0.311	7.20302e-51	cTEC	Myo3b	-50.1425	0.0680529	0.025247	0.140306	0.0168634	0.0989534	1.54353	6.17953	3.40961	1.50673	0.549296	0.0508475	1.46786	0.0798479	0.0964912	0.0298507	0	1.0337	1.01527	1.1061	1.01334	1.14227	1.35722	2.42108	2.26855	2.05016	1.23354	1.02164	1.60429	1.08155	1.04373	1.02249	1
1.13651e-55	-1.93675	0.191	0.506	3.82957e-51	cTEC	Pdlim4	-50.4168	0.603025	0.244786	0.446429	0.632378	0.91746	7.64955	7.15565	2.75651	1.03587	1.14554	5.76271	0.885714	0.0608365	0.0175439	2.1194	0.0434783	1.26413	1.1461	1.29788	1.38076	1.71349	2.18563	2.2638	1.98365	1.73818	1.47032	2.24613	1.2656	1.03909	1.00418	1.98141	1.08258
9.33573e-56	-5.19323	0.053	0.312	3.14577e-51	cTEC	Calcb	-50.5023	0.0567108	0.0318332	0.109694	0.0489039	0.0482873	6.71205	22.9079	3.95765	2.42601	0.600939	0.118644	0.0464286	0.0532319	0.0438596	0.0447761	0	1.04335	1.01901	1.06892	1.02443	1.06234	2.03662	3.47913	2.07612	2.13329	1.24064	1.05286	1.04434	1.05753	1.01361	1.02275	1
3.6411e-56	-5.69752	0.009	0.25	1.22691e-51	cTEC	Kynu	-50.9112	0.0094518	0.00548847	0.0433673	0.00337268	0.00880114	2.54018	3.70874	0.892508	1.04933	0.455399	0.0169492	0.132143	0.338403	0.0263158	0	0	1.00609	1.00345	1.03353	1.00146	1.01399	1.50722	1.91584	1.43162	1.72946	1.23093	1.01585	1.09698	1.14295	1.00568	1	1
4.21255e-57	-3.16206	0.098	0.401	1.41946e-52	cTEC	Skint1	-51.8479	0.1569	0.0175631	0.125	0.0303541	0.499524	4.33147	3.93134	3.57492	1.86547	0.399061	0.0338983	1.175	0.193916	0.0614035	0	0	1.09323	1.00906	1.12366	1.02425	1.51979	1.81355	1.9733	2.3474	2.13102	1.16923	1.02783	1.55172	1.12015	1.01896	1	1
3.3893e-57	-4.06037	0.034	0.308	1.14206e-52	cTEC	Cd80	-51.9423	0.0378072	0.0131723	0.0357143	0.0236088	0.0892008	2.44085	2.91343	1.95358	1.21076	0.197183	0.0169492	0.2	0.296578	0.00877193	0.0149254	0	1.02492	1.00645	1.02529	1.0192	1.12146	1.5061	1.76418	1.84762	1.81521	1.09667	1.01256	1.11833	1.13138	1.00253	1.00539	1
1.43893e-57	-2.82852	0.157	0.472	4.84863e-53	cTEC	Dock10	-52.3144	0.304348	0.177827	0.290816	0.13828	0.576832	4.73772	8.13475	4.057	5.64574	2.52582	0.220339	0.235714	3.14449	0.0614035	1.20896	0.0434783	1.19646	1.11488	1.23363	1.09956	1.60357	1.94398	2.71597	2.42315	3.32419	1.9228	1.09695	1.16581	2.59474	1.02574	1.64227	1.14474
1.41257e-57	-2.49523	0.325	0.617	4.7598e-53	cTEC	Pcdh7	-52.3224	0.776938	1.05269	1.83163	1.52951	2.62179	4.5692	6.7855	5.35505	4.37668	4.78873	0.779661	1.27857	0.152091	2.79825	1.86567	0.0434783	1.39938	1.54301	2.02387	1.76465	2.7831	1.99388	2.56119	2.80924	2.88061	2.44731	1.34498	1.54934	1.10198	1.73285	1.85845	1.04746
4.90432e-58	-3.57472	0.083	0.379	1.65256e-53	cTEC	Pla2g4a	-52.7818	0.10397	0.090011	0.267857	0.121417	0.18197	4.79576	5.98294	2.90391	1.15247	0.605634	0.338983	1.40714	0.0798479	0.359649	1.0597	0	1.06217	1.05553	1.18074	1.08944	1.19874	1.86975	2.16817	2.10878	1.76498	1.26107	1.14111	1.92066	1.06269	1.11208	1.39304	1
3.85858e-58	-4.99043	0.025	0.292	1.30019e-53	cTEC	Adgb	-52.886	0.0321361	0.0153677	0.0178571	0.0118044	0.0625595	1.56473	4.03454	2.4772	3.78924	0.830986	0.0338983	0.153571	0.0570342	0.412281	0.0447761	0	1.01909	1.01479	1.01459	1.0096	1.09341	1.386	2.06938	2.10041	3.00248	1.45148	1.02107	1.13601	1.05826	1.13246	1.05713	1
1.67663e-58	-1.2632	0.618	0.698	5.64956e-54	cTEC	Tspo	-53.248	2.15879	1.80461	2.94643	3.02361	2.37464	9.81027	11.8814	5.64495	2.287	3.32864	9.45763	2.42857	1.88593	1.60526	7.31343	2.08696	1.72532	1.78799	2.20199	2.1786	2.24906	2.42759	2.75621	2.53268	2.08686	2.14656	2.79655	1.92037	1.95114	1.37226	2.90918	2.71064
1.24659e-58	-3.10583	0.212	0.436	4.20051e-54	cTEC	Pip5k1b	-53.3767	0.266541	0.208562	1.19388	0.300169	0.096099	4.31138	8.20341	2.71417	1.59641	5.64789	10.8305	4.63929	0.608365	0.403509	0.328358	0	1.11966	1.11638	1.67961	1.15474	1.10015	1.80025	2.56963	2.04848	2.05218	2.68072	2.83798	2.64389	1.58567	1.12729	1.32156	1
8.18416e-59	-5.32507	0.034	0.296	2.75773e-54	cTEC	Hdc	-53.5594	0.0434783	0.0164654	0.0331633	0.0404722	0.0256898	6.40067	14.5122	2.9601	0.524664	1.03286	0.0677966	0.1	0.0418251	0.0350877	0.0298507	0	1.02732	1.01135	1.02447	1.02473	1.03784	2.03391	2.98961	2.0287	1.4374	1.41507	1.01989	1.08525	1.04335	1.02277	1.00838	1
4.89748e-60	-1.07241	0.766	0.567	1.65026e-55	cTEC	Lrrc42	-54.7824	2.60302	0.725576	0.357143	0.58516	0.717412	24.2355	24.6226	4.51792	0.780269	1.1831	0.983051	1.28929	0.574144	0.333333	0.253731	0.0434783	1.84065	1.35391	1.25803	1.29952	1.55308	3.29511	3.55615	2.31683	1.55124	1.48232	1.32154	1.55142	1.49258	1.11645	1.09629	1.06095
3.61246e-60	-6.9156	0.006	0.251	1.21725e-55	cTEC	Gm47938	-54.9146	0.00567108	0.00658617	0.0178571	0.0151771	0.00975262	3.61607	4.56333	1.4259	0.690583	1.48357	0	0.0571429	0.0190114	0.0175439	0	0	1.00211	1.00372	1.02418	1.01138	1.01254	1.65455	1.93961	1.53269	1.39888	1.50547	1	1.03094	1.01354	1.00414	1	1
3.1619e-61	-4.96855	0.095	0.378	1.06543e-56	cTEC	Cd52	-55.9725	0.119093	0.11416	0.0943878	0.0657673	0.128211	4.83371	23.4725	21.7394	4.90135	0.699531	0.152542	1.475	8.06464	0.0350877	0.223881	0.0434783	1.08371	1.06604	1.08422	1.03641	1.16209	1.85504	3.52752	3.99446	2.47048	1.2739	1.0701	1.60221	3.02248	1.02301	1.10001	1.14474
5.42271e-65	-4.33503	0.098	0.358	1.82723e-60	cTEC	Aire	-59.7382	0.143667	0.0472009	0.0663265	0.0623946	0.0746908	13.9364	22.0243	4.11971	0.721973	0.366197	0.0338983	0.160714	0.0684411	0.0263158	0.0447761	0.0434783	1.09182	1.03481	1.05554	1.04156	1.10384	2.75084	3.54235	2.34347	1.65902	1.18204	1.01384	1.10106	1.08536	1.00593	1.02846	1.06095
3.08857e-67	-3.84383	0.078	0.392	1.04072e-62	cTEC	Il4i1	-61.9827	0.221172	0.053787	0.147959	0.0590219	0.444339	17.3571	18.084	4.90472	4.74888	0.408451	0.0847458	0.164286	0.653992	0.0438596	0.0895522	0.0434783	1.12145	1.0318	1.11844	1.04483	1.34937	2.98226	3.21428	2.38833	2.78952	1.17576	1.04694	1.09658	1.2958	1.01134	1.04313	1.15204
1.28822e-67	-3.53783	0.113	0.429	4.34079e-63	cTEC	Plb1	-62.3624	0.247637	0.126235	1.51786	0.283305	0.602997	13.0346	11.9296	4.32818	6.22422	0.413146	0.677966	0.139286	0.0532319	0.0438596	0.0895522	0.0434783	1.11996	1.07643	1.79219	1.21228	1.44086	2.67533	2.76806	2.30949	2.8769	1.17952	1.28242	1.08796	1.03695	1.01088	1.06603	1.05377
8.67261e-69	-4.21386	0.064	0.384	2.92232e-64	cTEC	Cadps	-63.5343	0.0907372	0.0230516	0.0510204	0.0168634	0.422931	2.76674	9.05928	3.95847	1.17489	7	0.0677966	0.728571	0.0532319	0.0263158	0.0149254	0	1.05919	1.01782	1.04435	1.01564	1.45606	1.56318	2.58662	2.30219	1.88774	2.89042	1.03222	1.40022	1.04516	1.00701	1.00742	1
3.98906e-70	-3.88648	0.051	0.375	1.34415e-65	cTEC	Fscn1	-64.8716	0.0756144	0.0428101	0.0969388	0.123103	0.190533	6.63281	7.0887	2.8241	1.04484	1.01878	0.152542	0.639286	1.12167	0.0438596	0.791045	0.782609	1.05612	1.02742	1.06907	1.0677	1.22665	2.05316	2.33274	2.06739	1.59186	1.44441	1.05978	1.3694	1.55934	1.02745	1.38598	1.95496
3.82759e-70	-1.19235	0.822	0.878	1.28975e-65	cTEC	App	-64.8895	3.15312	6.47859	5.52296	6.47386	3.62131	10.4442	6.32154	6.25896	11.4305	7.22535	37.2203	4.83214	0.467681	1	7.95522	3.43478	2.06207	2.87814	2.96199	2.7947	2.97805	2.5208	2.30791	2.89565	3.90344	2.90158	4.2841	2.69424	1.29947	1.25459	2.94239	3.0656
2.60981e-70	-3.50373	0.471	0.652	8.794e-66	cTEC	Srgn	-65.0558	2.12476	0.413831	0.568878	1.14671	1.96051	91.1875	143.538	46.1376	13.1883	5.56808	1.20339	1.86071	8.61217	0.333333	0.865672	6.04348	1.83368	1.25699	1.42218	1.67575	2.07717	4.95561	5.86687	4.92633	3.61749	2.47682	1.44068	1.73997	3.42197	1.10133	1.42298	3.93139
3.65827e-71	-5.2677	0.013	0.311	1.23269e-66	cTEC	Cdx1	-65.9091	0.0189036	0.00658617	0.0102041	0.00674536	0.018078	7.54799	5.86908	2.03664	1.0852	0.971831	0.0508475	0.614286	0.0190114	0.00877193	0	0	1.01504	1.00606	1.01108	1.00522	1.03013	2.1629	2.11813	1.79181	1.82479	1.44985	1.01851	1.40869	1.01594	1.00152	1	1
1.10535e-71	-3.56658	0.096	0.442	3.7246e-67	cTEC	Ptprq	-66.4289	0.236295	0.0428101	0.0714286	0.0556492	1.24049	14.3315	8.85288	4.80375	2.91031	0.887324	0.237288	1.37857	0.144487	0.00877193	0.0298507	0	1.15023	1.02666	1.04938	1.04843	2.01168	2.89936	2.74144	2.63348	2.47422	1.39732	1.15485	1.60367	1.12004	1.00199	1.04511	1
3.71484e-72	-4.30676	0.055	0.386	1.25175e-67	cTEC	Htr7	-66.9025	0.0775047	0.0208562	0.145408	0.311973	0.44196	4.53237	4.06055	2.26792	0.41704	0.84507	0.0677966	0.471429	0.361217	0.00877193	0	0	1.03779	1.01097	1.10185	1.17248	1.5048	1.86719	2.02342	1.9694	1.3091	1.36552	1.02825	1.26624	1.21898	1.00161	1	1
2.05033e-73	-3.41601	0.161	0.477	6.9088e-69	cTEC	Ctsz	-68.1606	0.204159	0.45225	0.665816	0.617201	0.277593	8.59598	8.14925	5.07492	4.79821	4.07512	7.55932	0.928571	2.08745	8.25439	3.34328	1.43478	1.10583	1.25073	1.31734	1.3381	1.22712	2.27747	2.4157	2.3805	2.52587	2.25857	2.53015	1.41027	1.78206	2.38915	2.20909	2.30891
5.8256e-74	-1.41231	0.505	0.347	1.96299e-69	cTEC	Gas1	-68.7071	1.55388	15.5763	1.26276	7.93255	2.37226	0.305804	0.0686567	0.034202	0.0134529	0.0657277	1.61017	0.125	0.0912548	0.298246	6.07463	0	1.54747	3.86542	1.78308	3.02222	2.33348	1.09505	1.02602	1.0299	1.01393	1.04531	1.44434	1.06569	1.05327	1.07222	2.57478	1
5.7474e-74	-4.81534	0.049	0.375	1.93664e-69	cTEC	Cldn7	-68.713	0.0604915	0.0592755	2.75255	0.350759	0.0578021	4.03013	5.24776	5.25407	4.53812	5.10329	8.52542	5.475	0.0646388	4.01754	0	0.0434783	1.03205	1.03023	2.0701	1.17467	1.05767	1.73533	2.05335	2.51455	2.66437	2.455	2.61007	2.67855	1.03985	1.80673	1	1.15204
5.18932e-74	-5.12522	0.04	0.364	1.74859e-69	cTEC	Skint2	-68.7573	0.0548204	0.01427	0.0382653	0.0303541	0.464558	3.36384	5.16034	4.13518	1.11659	0.661972	0.0338983	0.128571	0.0380228	0.0350877	0	0	1.02489	1.01148	1.03295	1.023	1.55174	1.67605	2.13144	2.42141	1.653	1.28081	1.02204	1.04437	1.03271	1.00792	1	1
7.61132e-77	-5.2854	0.062	0.394	2.56471e-72	cTEC	Ctsh	-71.591	0.073724	0.0472009	1.64796	0.993255	0.123454	4.57143	15.1659	4.01547	12.9417	0.366197	0.881356	0.25	1.41445	1.0614	1.91045	0	1.03607	1.03241	1.74102	1.52068	1.1488	1.79822	3.01054	2.23513	3.86997	1.13713	1.34542	1.21355	1.52986	1.25366	1.69364	1
1.50629e-78	-4.01107	0.062	0.416	5.07561e-74	cTEC	Blnk	-73.2945	0.0831758	0.0439078	0.32398	0.202361	0.240247	3.57031	5.35608	2.48208	2.04484	2.69484	2.69492	1.21071	0.152091	1.07018	0.104478	0	1.04709	1.03081	1.22807	1.10194	1.30405	1.69411	2.14457	2.00735	2.20613	2.00792	1.68202	1.65503	1.09595	1.27676	1.03696	1
9.3567e-81	-4.72815	0.042	0.388	3.15283e-76	cTEC	Laptm5	-75.5013	0.0699433	0.0197585	0.0637755	0.0252951	0.176974	11.0491	9.18166	3.43404	1.08072	3.0939	0.389831	2.03929	2.47909	0.0789474	0	0.0869565	1.04276	1.01358	1.05311	1.01373	1.22355	2.55035	2.56175	2.16655	1.75718	2.01369	1.16908	2.00647	2.4904	1.03377	1	1.21998
1.8709e-82	-1.43717	0.577	0.709	6.30418e-78	cTEC	Psme1	-77.2004	1.65974	2.39517	3.57143	2.24958	1.53972	16.8661	12.3424	6.12622	2.84753	4.71362	6.16949	2.27143	3.44106	1.74561	2.35821	2.08696	1.65213	2.00232	2.41766	1.96946	1.92943	2.91496	2.78599	2.66526	2.12927	2.36441	2.41861	1.79797	2.35817	1.41841	1.99118	2.75163
2.84089e-93	-3.81084	0.204	0.562	9.57266e-89	cTEC	Syt1	-88.019	0.672968	0.0801317	0.242347	0.0994941	1.46955	28.5569	28.7808	22.3249	14.7803	44.4648	4.89831	5.55	0.532319	0.149123	0.0597015	0.0869565	1.35855	1.06778	1.18917	1.08405	2.18096	3.66066	4.13319	4.42142	4.5119	5.08318	2.3206	2.73832	1.30485	1.05885	1.03649	1.13891
7.60542e-106	-4.41639	0.191	0.572	2.56272e-101	cTEC	Cyba	-100.591	0.431002	0.192097	3.375	0.669477	0.614177	50.2411	49.8281	17.623	8.01794	5.97183	5.9322	3.04286	3.46768	1.64035	4.0597	1	1.22467	1.11607	2.24632	1.43022	1.47443	4.19518	4.46151	3.77315	3.3623	2.56948	2.46499	2.09385	2.29429	1.39329	2.34153	2.2101

## Sheet: TEC Progenitors
p_val	avg_log2FC	pct.1	pct.2	p_val_adj	cluster	gene	p_val_adj_score	avg_RNA_counts_idcTEC	avg_RNA_counts_idPdpn+ TEC	avg_RNA_counts_idMimetic globet	avg_RNA_counts_idUnknown	avg_RNA_counts_idmTEC-I	avg_RNA_counts_idTransit-amplifying/Proliferating	avg_RNA_counts_idmTEC-II	avg_RNA_counts_idmTEC-II (Post-Aire)	avg_RNA_counts_idMicrofoldTEC	avg_RNA_counts_idEndoTEC	avg_RNA_counts_idIonocytes mTEC	avg_RNA_counts_idTuft cells	avg_RNA_counts_idT-cells	avg_RNA_counts_idParathyroid cells	avg_RNA_counts_idMesenchymal cells	avg_RNA_counts_idEndothelial cells	avg_RNA_data_idcTEC	avg_RNA_data_idPdpn+ TEC	avg_RNA_data_idMimetic globet	avg_RNA_data_idUnknown	avg_RNA_data_idmTEC-I	avg_RNA_data_idTransit-amplifying/Proliferating	avg_RNA_data_idmTEC-II	avg_RNA_data_idmTEC-II (Post-Aire)	avg_RNA_data_idMicrofoldTEC	avg_RNA_data_idEndoTEC	avg_RNA_data_idIonocytes mTEC	avg_RNA_data_idTuft cells	avg_RNA_data_idT-cells	avg_RNA_data_idParathyroid cells	avg_RNA_data_idMesenchymal cells	avg_RNA_data_idEndothelial cells
0	5.2209	0.484	0.026	0	Pdpn+ TEC	Gm13629	#NUM!	0.652174	1.41383	0	0.124789	0.00666032	0.0145089	0.0503198	0.00407166	0	0.0140845	0	0	0	0.00877193	0.0149254	0	1.25674	1.65961	1	1.0695	1.00543	1.00633	1.0139	1.00176	1	1.00485	1	1	1	1.00143	1.00356	1
0	5.08131	0.727	0.043	0	Pdpn+ TEC	Scn1a	#NUM!	1.60113	3.78705	0.0178571	0.418212	0.05804	0.00446429	0.0584222	0.000814332	0	0.028169	0	0	0.0190114	0.0438596	0.0895522	0	1.53893	2.38556	1.01898	1.20702	1.05501	1.00149	1.02171	1.00024	1	1.00969	1	1	1.01302	1.01911	1.05124	1
0	4.76955	0.804	0.069	0	Pdpn+ TEC	Ackr4	#NUM!	1.57656	4.4753	0.0637755	0.335582	0.121075	0.0379464	0.0537313	0.0179153	0.00896861	0.0469484	0.169492	0.610714	0.0114068	0.0175439	0.0895522	0	1.51943	2.43244	1.05096	1.16409	1.08747	1.01171	1.01697	1.0129	1.01637	1.01772	1.04701	1.35509	1.00549	1.00286	1.03173	1
0	4.3454	0.76	0.058	0	Pdpn+ TEC	Prelp	#NUM!	0.294896	2.59166	0.160714	0.629005	0.0896765	0.0357143	0.0528785	0.00325733	0	0.00469484	0.0338983	0.00714286	0.00760456	0	3.76119	0	1.10981	2.0244	1.1334	1.34502	1.07541	1.01177	1.01446	1.00117	1	1.00162	1.02147	1.00433	1.00363	1	2.14351	1
0	4.26581	0.945	0.265	0	Pdpn+ TEC	Dcn	#NUM!	3.46692	43.0494	3.59439	6.74874	1.29876	0.762277	1.72154	0.446254	0.206278	0.253521	19.2712	0.0714286	0.0494297	0.0526316	112.881	0	1.96959	5.16038	2.57254	2.86938	1.76215	1.22533	1.46084	1.20427	1.22288	1.15177	3.67775	1.04124	1.05533	1.02478	6.33006	1
0	4.24197	0.495	0.025	0	Pdpn+ TEC	Prss23	#NUM!	0.194707	1.30845	0.0382653	0.715008	0.0076118	0.0167411	0.0119403	0.002443	0.0044843	0.0610329	0.40678	0	0.0228137	0	2.44776	0.73913	1.07545	1.60802	1.02806	1.32186	1.00553	1.00356	1.00384	1.00124	1.00679	1.06236	1.14908	1	1.01096	1	2.07167	1.67528
0	3.60112	0.615	0.063	0	Pdpn+ TEC	Pmp22	#NUM!	0.461248	1.60483	0.153061	0.311973	0.108706	0.0558036	0.0324094	0.0211726	0.044843	0.00938967	0.118644	0.00714286	0.00380228	0.157895	3.8806	0.130435	1.17616	1.71781	1.11411	1.17512	1.07836	1.01333	1.01168	1.00981	1.05468	1.00327	1.0298	1.00178	1.00183	1.03852	2.63721	1.21915
0	3.60031	0.697	0.085	0	Pdpn+ TEC	Grm8	#NUM!	3.28166	4.42591	0.0663265	0.279933	0.247383	0.0747768	0.444776	0.0757329	0.00896861	0.286385	0.186441	0.278571	0.0988593	0.00877193	0	0	2.04331	2.52873	1.03591	1.10281	1.24359	1.01688	1.16281	1.05505	1.00286	1.11833	1.06573	1.08893	1.05744	1.00143	1	1
0	3.27599	0.842	0.165	0	Pdpn+ TEC	Rnase4	#NUM!	1.01701	4.65203	1.46173	0.527825	0.195052	0.120536	0.18209	0.486156	0.0807175	5.50235	4.35593	0.0392857	0.0114068	1.41228	5.49254	0.130435	1.35622	2.48998	1.84874	1.30818	1.16356	1.03094	1.06233	1.24229	1.07794	2.59299	2.1369	1.02078	1.01609	1.33777	2.52927	1.1579
0	3.24976	0.587	0.062	0	Pdpn+ TEC	Gpm6b	#NUM!	0.294896	1.69155	0.0612245	0.546374	0.0337774	0.114955	0.21919	0.0749186	0.0941704	0.126761	4.08475	0.0714286	0.0684411	0.45614	5.53731	0	1.10991	1.73837	1.04616	1.32039	1.03926	1.03058	1.07725	1.0527	1.05649	1.06433	2.05318	1.05013	1.0397	1.18243	2.86206	1
0	2.9886	0.958	0.305	0	Pdpn+ TEC	Gas1	#NUM!	1.55388	15.5763	1.26276	7.93255	2.37226	0.305804	0.0686567	0.034202	0.0134529	0.0657277	1.61017	0.125	0.0912548	0.298246	6.07463	0	1.54747	3.86542	1.78308	3.02222	2.33348	1.09505	1.02602	1.0299	1.01393	1.04531	1.44434	1.06569	1.05327	1.07222	2.57478	1
0	2.92279	0.723	0.141	0	Pdpn+ TEC	1700019D03Rik	#NUM!	2.17013	2.39517	0.196429	1.24958	0.201713	0.16183	0.176546	0.0741042	0.0986547	0.525822	1.57627	0.185714	0.0418251	0.157895	0.119403	0	1.72685	1.97519	1.14366	1.51063	1.17891	1.04033	1.05767	1.04478	1.12809	1.22266	1.45748	1.0613	1.0211	1.05101	1.07367	1
0	2.91384	0.854	0.23	0	Pdpn+ TEC	Nrtn	#NUM!	2.07183	4.29418	0.451531	0.482293	0.63844	0.773438	0.208102	0.0757329	0.0134529	0.183099	0.457627	0.15	0.0456274	0.315789	0.134328	0	1.73049	2.41877	1.3291	1.23602	1.48345	1.1811	1.06436	1.04712	1.01856	1.07752	1.14694	1.04514	1.02891	1.07101	1.03744	1
0	2.80089	0.66	0.096	0	Pdpn+ TEC	Defb1	#NUM!	0.149338	2.20637	0.543367	0.210793	0.18863	0.0457589	0.153945	1.28094	0.0493274	1.01408	0.288136	0.0392857	0.0114068	0.0175439	0.0149254	0	1.05664	1.90242	1.40221	1.11014	1.13831	1.01257	1.06608	1.58845	1.02419	1.32481	1.17857	1.02918	1.00561	1.00292	1.00356	1
0	2.79788	0.813	0.203	0	Pdpn+ TEC	Kazald1	#NUM!	1.73346	3.42591	0.204082	2.2597	0.40295	0.232143	0.238806	0.181596	0	0.225352	0.101695	0.0357143	0.0342205	3.18421	0.238806	0	1.57971	2.21481	1.15579	1.91721	1.30211	1.06791	1.07659	1.09905	1	1.12484	1.03931	1.01674	1.01095	1.66978	1.14892	1
0	2.74617	0.939	0.446	0	Pdpn+ TEC	Oat	#NUM!	3.85066	9.00549	2.47449	4.35076	1.12869	2.08371	1.19488	0.440554	0.412556	0.934272	3.11864	0.239286	0.486692	2	3.13433	0.217391	2.08915	3.17095	2.1437	2.40812	1.66457	1.42459	1.32351	1.19477	1.25532	1.39638	1.78181	1.1317	1.32994	1.44036	2.22139	1.33951
0	2.67215	0.895	0.195	0	Pdpn+ TEC	Cxcl12	#NUM!	23.1002	8.99012	0.298469	3.28836	0.599905	0.196429	0.174414	0.0333876	0.0313901	0.131455	0.101695	0.132143	0.114068	0.692982	2.47761	10.087	3.85324	3.11101	1.24125	2.11434	1.40557	1.04953	1.05703	1.02719	1.04922	1.05772	1.0325	1.0852	1.10538	1.11096	1.9898	4.58964
0	2.61141	0.834	0.232	0	Pdpn+ TEC	Bcam	#NUM!	0.724008	3.40834	1.82398	1.78921	0.49001	0.409598	0.224307	0.0863192	0.0134529	0.338028	1	0.189286	0.0228137	0.201754	1.0597	1.34783	1.27754	2.23387	2.04348	1.72595	1.37953	1.11017	1.06599	1.04166	1.01076	1.18798	1.30264	1.05689	1.01499	1.0547	1.63326	2.22265
0	2.60828	0.779	0.131	0	Pdpn+ TEC	Gstm2	#NUM!	0.778828	2.73655	1.21684	5.20573	0.0899144	0.114955	0.419616	0.151466	0.058296	0.0657277	0.881356	0.1	0.00760456	0.149123	1.35821	0.391304	1.27425	2.04329	1.66116	2.45701	1.07497	1.04031	1.12328	1.07915	1.0306	1.0227	1.30357	1.05266	1.0163	1.04483	1.64871	1.53257
0	2.6006	0.965	0.345	0	Pdpn+ TEC	Cpne8	#NUM!	2.75236	6.36883	1.69388	2.09949	0.99001	0.390625	0.328785	0.451954	0.233184	0.985915	7.94915	0.192857	0.0380228	0.368421	1.40299	1.17391	1.84539	2.88662	2.031	1.80847	1.77256	1.10212	1.10286	1.27736	1.18842	1.46078	2.5196	1.10334	1.02827	1.12039	1.76492	2.10674
0	2.43655	0.905	0.305	0	Pdpn+ TEC	Ptprz1	#NUM!	1.16446	5.99232	1.69388	0.563238	1.16009	0.878348	0.805544	0.267101	1.66368	0.408451	0.288136	0.125	0.0380228	0.00877193	0.343284	0	1.46576	2.82051	2.06445	1.26632	1.88125	1.21437	1.25779	1.15416	2.07959	1.17834	1.09092	1.06113	1.02507	1.00199	1.36561	1
0	2.4141	0.976	0.431	0	Pdpn+ TEC	Apoe	#NUM!	5.02457	33.0889	12.9413	9.38954	8.6558	1.44978	0.791045	1.6759	0.408072	1.6385	1.22034	0.492857	0.235741	0.131579	37.9104	3.56522	2.31851	4.90743	4.16752	3.49729	3.54418	1.36801	1.2695	1.66128	1.26022	1.60247	1.43048	1.43055	1.18591	1.06325	5.21658	3.32693
0	2.38798	0.855	0.232	0	Pdpn+ TEC	Mgll	#NUM!	2.50095	3.8112	0.788265	1.1973	0.116794	0.732143	1.91215	1.09121	0.426009	0.352113	0.440678	1.18571	0.174905	0.614035	0.791045	5.04348	1.76236	2.32843	1.55411	1.48888	1.10748	1.1712	1.54092	1.55768	1.336	1.17409	1.13886	1.56837	1.0729	1.19815	1.60655	3.76081
0	2.26966	0.958	0.368	0	Pdpn+ TEC	Pltp	#NUM!	17.8733	9.1416	0.469388	1.2968	1.70029	1.30915	0.627292	0.129479	0.058296	0.0985915	0.288136	0.075	0.224335	0.815789	1.07463	1.73913	3.68391	3.18496	1.36959	1.56454	2.03236	1.32495	1.18238	1.0703	1.05445	1.06185	1.10292	1.0415	1.1455	1.18238	1.49158	2.45148
0	2.19947	0.907	0.285	0	Pdpn+ TEC	Rbp1	#NUM!	3.70132	6.67618	1.12245	4.84823	1.61656	0.327009	0.154797	0.128664	0.0403587	0.112676	2.13559	0.964286	0.0418251	0.315789	5.14925	0.130435	2.0288	2.82101	1.66042	2.47946	1.96305	1.09678	1.05233	1.08835	1.0574	1.07873	1.57159	1.2698	1.02895	1.08418	2.52909	1.14687
0	2.14403	0.932	0.246	0	Pdpn+ TEC	Sparc	#NUM!	2.15879	7.73655	0.352041	5.27993	1.3637	0.294643	1.67548	0.149023	0.210762	0.056338	0.271186	0.782143	0.0608365	1.84211	48.9403	16.5652	1.7205	2.98607	1.25924	2.70373	1.76657	1.06701	1.43606	1.05542	1.06789	1.0416	1.0914	1.29333	1.03425	1.39928	5.52677	5.30033
0	2.10443	0.973	0.472	0	Pdpn+ TEC	Nfib	#NUM!	4.89603	8.79693	7.03061	3.51771	1.38915	1.76004	0.428998	0.385993	1.79372	0.276995	7.37288	1.29286	0.117871	1.11404	4.76119	4.34783	2.38516	3.22817	3.30714	2.22986	2.12464	1.46111	1.17023	1.24911	2.28904	1.12069	2.36585	1.44519	1.07862	1.33825	2.39084	3.21187
0	1.93636	0.945	0.545	0	Pdpn+ TEC	Txnip	#NUM!	4.09452	9	2.51786	6.07926	1.06185	1.97656	1.70149	3.0684	1.56502	6.59155	9.61017	3.15	1.14829	3.34211	6.73134	7.04348	2.19149	3.18404	2.26162	2.70312	1.85415	1.43623	1.44841	2.20098	2.05376	2.72382	2.72737	2.1283	1.84698	1.70795	2.99501	4.11752
0	1.85234	0.996	0.894	0	Pdpn+ TEC	Itm2b	#NUM!	43.2231	72.8189	23.7321	73.1265	14.1461	28.3862	20.6098	23.9902	6.28251	23.2441	54.3559	13.8964	6.09506	33.614	33.597	16.5217	4.72241	5.85902	4.57027	5.78391	4.06993	3.54787	3.37941	4.16741	2.8577	4.13794	4.84489	3.27944	3.15699	3.86591	4.95515	5.24423
0	1.85171	0.985	0.62	0	Pdpn+ TEC	Gas6	#NUM!	21.087	12.2876	1.22704	4.57504	2.91151	2.99777	2.1032	1.5399	0.0717489	0.859155	3	0.339286	0.163498	2.02632	1.92537	1.26087	3.91297	3.54976	1.8053	2.43597	2.54334	1.62067	1.54186	1.66515	1.05945	1.37635	1.8373	1.17614	1.10829	1.44695	1.80211	2.19811
0	1.54066	0.96	0.701	0	Pdpn+ TEC	Laptm4a	#NUM!	8.20038	9.01427	3.26786	8.40978	2.32945	6.51897	3.32111	1.95358	1.01794	2.42254	14.6949	2.20714	0.847909	8.10526	12.8209	3.26087	2.71914	3.18423	2.33581	3.05691	2.19601	2.06538	1.74371	1.75612	1.60858	1.87502	3.16741	1.71684	1.57283	2.33803	3.62256	3.15698
1.78248e-307	1.52655	0.945	0.714	6.00623e-303	Pdpn+ TEC	Sec62	302.221	4.91682	7.56641	3.14796	5.1113	1.62536	4.75893	3.52409	2.10586	1.00897	3.84038	6.08475	2.29286	2.25856	5.75439	4.13433	1.56522	2.30983	2.98155	2.34768	2.55458	2.01423	1.86891	1.81789	1.83177	1.66841	2.20038	2.31798	1.80042	2.33675	2.11902	2.43094	2.40566
5.96875e-306	3.32216	0.575	0.069	2.01123e-301	Pdpn+ TEC	Arhgap6	300.697	0.376181	2.24588	0.729592	0.63575	0.0892008	0.128348	0.26226	0.0553746	0.0134529	0.0985915	0.576271	0.0107143	0.0494297	5.81579	2.68657	0	1.17518	2.02681	1.43476	1.32271	1.10299	1.03088	1.10789	1.03144	1.00954	1.04671	1.1698	1.00818	1.02428	2.35831	2.23862	1
2.6855e-304	3.19051	0.693	0.148	9.04905e-300	Pdpn+ TEC	G0s2	299.043	1.21361	4.00659	0.40051	1.74536	0.363225	0.242188	0.296802	0.0684039	0.206278	0.0938967	1.9661	0.0928571	0.0684411	0.0263158	3.37313	0.0434783	1.4721	2.34795	1.28678	1.69559	1.28037	1.05711	1.08329	1.03755	1.12457	1.0411	1.56365	1.02916	1.04753	1.0049	2.28558	1.07333
5.41693e-304	2.40037	0.798	0.263	1.82529e-299	Pdpn+ TEC	Cd200	298.739	1.7845	3.42371	0.211735	0.875211	0.420076	0.267857	1.07122	0.318404	1.11211	1.38028	0.847458	0.153571	0.144487	0.0263158	0.686567	3	1.58951	2.20584	1.17297	1.41484	1.34547	1.07005	1.31823	1.14763	1.74225	1.59507	1.24777	1.11324	1.1207	1.00573	1.49595	3.13966
7.18376e-304	1.65264	0.93	0.615	2.42064e-299	Pdpn+ TEC	Itm2c	298.616	8.27599	6.95499	1.89286	7.72175	1.24334	2.94754	2.3113	1.49674	0.914798	2.80282	2.74576	1.2	0.764259	14.6754	3.52239	0.826087	2.73911	2.87411	1.89678	2.91948	1.82146	1.59196	1.5684	1.60604	1.58422	2.05677	1.73413	1.52679	1.43705	2.88994	2.20216	1.92474
6.20708e-301	1.76735	0.982	0.594	2.09154e-296	Pdpn+ TEC	Rbms3	295.68	9.83554	16.416	15.9133	3.42159	3.92174	2.40179	0.877612	0.670195	0.210762	0.962441	2.74576	1.19643	0.140684	1.46491	12.1493	0.0434783	3.17965	4.01455	4.36556	2.26304	3.20983	1.60284	1.33254	1.46357	1.25935	1.41193	1.72329	1.56667	1.09675	1.45213	3.44155	1.05969
1.30356e-289	1.66957	0.928	0.559	4.39248e-285	Pdpn+ TEC	Pdgfa	284.357	2.53119	5.191	1.35204	1.72513	1.24025	3.30469	2.83326	1.3355	0.381166	1.09859	2.61017	0.364286	0.121673	0.850877	1.47761	0.0869565	1.87047	2.61163	1.82622	1.73025	1.86609	1.63134	1.67295	1.58406	1.30961	1.45793	1.69909	1.12388	1.07871	1.21525	2.01371	1.15672
5.96955e-288	2.25596	0.768	0.341	2.0115e-283	Pdpn+ TEC	Pfn2	282.696	1.65028	2.58946	0.364796	1.28499	0.270219	1.875	1.52921	0.404723	0.044843	0.596244	2.25424	0.410714	0.0380228	1.08772	0.38806	0.0434783	1.53055	2.01396	1.2139	1.53281	1.20443	1.37502	1.36484	1.15675	1.04107	1.26034	1.64969	1.14583	1.0407	1.2576	1.25889	1.05205
3.94315e-285	1.55553	0.891	0.303	1.32869e-280	Pdpn+ TEC	Mgp	279.877	3.28922	13.9484	2.94898	14.1433	6.32398	0.310268	0.593177	0.0651466	0.0358744	0.15493	0.423729	0.15	0.0570342	0.192982	40.2388	0.217391	2.08743	3.68574	2.44255	3.99819	3.12612	1.11075	1.19613	1.05665	1.04288	1.08684	1.12836	1.09011	1.06071	1.04238	5.05069	1.28218
7.87953e-282	1.30099	0.974	0.801	2.65509e-277	Pdpn+ TEC	Gas5	276.576	10.794	14.3469	3.37245	11.1079	3.42674	18.2511	12.316	3.18322	0.874439	2.88263	12.661	4.66429	5.69962	6.99123	6.74627	0.869565	3.04481	3.72643	2.41557	3.39033	2.67243	3.02745	2.78828	2.13556	1.60106	1.98902	2.94079	2.23418	3.08088	2.16955	2.85917	1.92916
8.69277e-282	2.80528	0.615	0.098	2.92911e-277	Pdpn+ TEC	Tns1	276.533	0.716446	1.29418	0.367347	0.252951	0.0946717	0.0558036	0.313006	0.0724756	0.00896861	0.084507	0.881356	0.0535714	0.186312	0.429825	1.28358	0.521739	1.27174	1.64784	1.29902	1.13517	1.10755	1.01518	1.10906	1.04313	1.0109	1.0473	1.27141	1.03667	1.12707	1.16004	1.60982	1.593
3.7749e-280	1.31014	0.982	0.884	1.27199e-275	Pdpn+ TEC	Ly6e	274.896	23.1134	29.6037	22.8597	29.2766	8.33064	18.6406	11.3987	13.785	7.45291	10.3521	42.3559	6.39286	5.56274	50.0351	11.9701	11.2609	3.9634	4.70311	4.53531	4.56581	3.60537	3.12599	2.78253	3.58571	3.19609	3.1318	4.55244	2.57297	2.84741	4.37467	3.23492	4.70468
4.90147e-280	2.93294	0.623	0.111	1.6516e-275	Pdpn+ TEC	Kcnk2	274.782	2.39887	1.89462	0.147959	0.231029	0.166508	0.151786	0.0869936	0.036645	0.00896861	0.0751174	0.101695	0.0285714	0.0228137	0.114035	0.402985	0.0869565	1.83873	1.81286	1.10806	1.13171	1.16121	1.04473	1.03199	1.02186	1.008	1.06227	1.03152	1.03012	1.0151	1.02408	1.15385	1.11399
1.62633e-279	1.53996	0.964	0.601	5.48008e-275	Pdpn+ TEC	S100a10	274.261	13.9679	11.0944	4.38265	9.94941	2.77498	4.38616	3.42687	3.29072	2.73991	0.99061	14.339	0.625	2.1749	1.89474	7.38806	2.04348	3.25832	3.39257	2.64732	3.27448	2.34208	1.86164	1.80822	2.05865	2.39648	1.38182	3.1562	1.28237	2.22305	1.41695	2.9052	2.70887
1.36177e-270	2.7114	0.63	0.117	4.5886e-266	Pdpn+ TEC	Thra	265.338	0.512287	1.29199	0.364796	0.827993	0.0511418	0.0770089	0.114712	0.100977	0.210762	0.352113	0.661017	0.442857	0.136882	0.421053	2.32836	0.478261	1.19582	1.60821	1.24884	1.44002	1.05027	1.01968	1.03988	1.06775	1.22057	1.18862	1.22626	1.27127	1.16208	1.10432	2.13241	1.6434
3.3714e-265	1.6645	0.888	0.356	1.13603e-260	Pdpn+ TEC	Aldh2	259.945	3.67864	4.05269	2.67602	7.9747	0.471694	0.751116	0.410661	0.401466	0.358744	0.14554	11.5424	6.68214	0.589354	3.42105	3.71642	0.956522	1.98576	2.37289	2.13801	2.86285	1.39553	1.19934	1.1259	1.21596	1.2632	1.06086	2.77436	3.00113	1.35748	1.72368	2.34174	1.9294
3.66807e-265	2.06269	0.817	0.26	1.23599e-260	Pdpn+ TEC	Tgfbr3	259.908	1.34972	2.85401	0.762755	0.671164	0.537108	0.302455	0.191045	0.443811	0.282511	0.577465	2.10169	0.0964286	0.391635	1.57895	3.23881	0.782609	1.54749	2.17399	1.54878	1.34112	1.56118	1.08955	1.07901	1.30292	1.28437	1.30891	1.62505	1.06712	1.41926	1.44585	2.16011	1.95719
9.86084e-261	2.33996	0.641	0.122	3.32271e-256	Pdpn+ TEC	Snhg11	255.479	5.11531	2.89133	0.0969388	2.51939	0.252141	0.0491071	0.128358	0.17101	0.0044843	2.01878	4.05085	0.467857	0.0418251	0.166667	0	0	2.42129	2.12296	1.08077	1.89408	1.24169	1.01405	1.04611	1.11792	1.00351	1.76242	1.94348	1.32843	1.028	1.05123	1	1
6.82115e-259	2.93905	0.594	0.104	2.29846e-254	Pdpn+ TEC	Fras1	253.639	0.310019	1.91548	1.03061	0.219224	0.15295	0.111607	0.391471	0.0724756	0.00896861	0.0657277	0.169492	1.12857	0.0114068	0.0438596	0.0298507	0	1.17365	1.91573	1.72947	1.09481	1.17076	1.0356	1.1347	1.04814	1.00751	1.01925	1.06551	1.52824	1.00538	1.00972	1.03152	1
6.94926e-259	2.22816	0.745	0.196	2.34162e-254	Pdpn+ TEC	Fat3	253.63	0.928166	4.60922	0.329082	0.667791	1.20932	0.0714286	0.171002	0.0187296	0.00896861	0.15493	0.0508475	1.275	0.0228137	0.0263158	0.0298507	0	1.45187	2.64428	1.27286	1.3149	2.02195	1.03017	1.09225	1.01661	1.01146	1.07263	1.01852	1.85947	1.01127	1.00634	1.01542	1
5.83669e-256	1.11481	0.976	0.742	1.96673e-251	Pdpn+ TEC	Cst3	250.706	9.95463	14.6981	5.47959	15.8482	4.09348	7.08594	10.9339	8.88599	8.13004	6.11737	8.01695	2.86071	27.1103	14.9211	14.3731	12.3913	2.97907	3.79274	2.93794	3.95088	2.71056	2.14858	2.81524	2.96325	3.08988	2.63487	2.60676	2.04531	3.99732	2.93644	3.95838	4.87887
6.22383e-252	1.27651	0.962	0.75	2.09718e-247	Pdpn+ TEC	Ndufa11	246.678	21.3214	11.8222	3.54082	5.5683	3.56541	12.5402	6.86823	3.24593	1.47982	5.38498	10.8475	3.23214	1.3308	5.52632	2.85075	0.695652	3.87842	3.47324	2.51034	2.63672	2.5538	2.63329	2.25875	2.12476	1.87406	2.54412	2.89653	2.00357	1.68777	1.98324	2.15599	1.78437
1.04171e-249	2.60972	0.636	0.131	3.51016e-245	Pdpn+ TEC	Myl9	244.455	0.644612	3.06806	0.239796	0.634064	0.729781	0.106027	0.0592751	0.0415309	0.0044843	0.0375587	0.0338983	0.0321429	0.0342205	0.0263158	5.59701	0.173913	1.28397	2.14725	1.20952	1.40599	1.46336	1.02769	1.02276	1.02523	1.00366	1.02989	1.01247	1.02135	1.02053	1.0082	3.0935	1.2647
7.74386e-249	1.94576	0.797	0.253	2.60937e-244	Pdpn+ TEC	Frmd4b	243.583	1.24953	3.15917	0.875	0.895447	0.732398	0.13058	0.255864	0.427524	0.461883	0.206573	1.01695	0.117857	0.486692	1.15789	1.19403	0.347826	1.54627	2.24186	1.57334	1.45296	1.70367	1.04277	1.11935	1.27947	1.44384	1.10486	1.33546	1.05647	1.33311	1.2741	1.65043	1.49647
3.24537e-246	3.85273	0.451	0.049	1.09356e-241	Pdpn+ TEC	Il33	240.961	0.922495	2.51372	0.484694	0.860034	0.0237869	0.103795	0.241365	0.0684039	0.0044843	0	0.254237	0	0.0152091	0.0526316	3.32836	0.0434783	1.31754	1.93805	1.32033	1.38344	1.02109	1.03005	1.0697	1.03826	1.00296	1	1.08546	1	1.00382	1.01023	2.13366	1.05222
9.66641e-245	1.41509	0.937	0.599	3.25719e-240	Pdpn+ TEC	Nfix	239.487	4.49149	4.93085	1.72449	3.73019	1.26427	3.02902	1.32537	0.680782	0.282511	2.24413	4.10169	1.15714	0.13308	0.973684	3.1791	0.521739	2.28368	2.55917	1.97403	2.26287	2.02056	1.65351	1.38399	1.34365	1.21854	1.83059	1.94401	1.47795	1.07818	1.25575	2.12771	1.6138
4.96818e-243	1.86009	0.751	0.209	1.67408e-238	Pdpn+ TEC	Jag2	237.776	1.15501	1.76619	0.352041	0.168634	0.477165	0.339286	0.0793177	0.0545603	0	0.286385	0.101695	0.421429	0.0456274	0.140351	0	0.478261	1.49972	1.82327	1.30583	1.11652	1.51635	1.09989	1.03312	1.05032	1	1.16739	1.03023	1.19065	1.05532	1.03814	1	1.53589
1.41517e-242	2.75091	0.559	0.091	4.76856e-238	Pdpn+ TEC	Wscd1	237.322	1.09263	1.2876	0.0178571	0.247892	0.186489	0.0803571	0.0443497	0.0138436	0.0044843	0.0375587	0.0338983	0.0321429	0.0114068	0.114035	0	0.0434783	1.40636	1.57251	1.0187	1.13007	1.17181	1.02203	1.0169	1.01136	1.01125	1.01748	1.00912	1.00893	1.0088	1.03257	1	1.05222
8.74742e-241	1.75811	0.842	0.323	2.94753e-236	Pdpn+ TEC	Trim29	235.531	2.57089	2.95829	0.625	1.11636	0.897241	0.579241	0.182942	0.544788	0.0224215	0.140845	0.423729	0.35	0.0722433	0.0789474	0.19403	0	1.83214	2.10158	1.45692	1.49105	1.68889	1.14212	1.0559	1.27428	1.01975	1.06939	1.13482	1.12555	1.05419	1.01345	1.0494	1
1.273e-239	2.51395	0.647	0.178	4.2895e-235	Pdpn+ TEC	Tinagl1	234.368	0.920605	1.91438	0.270408	0.300169	0.200285	0.239955	0.789765	0.303746	0.174888	0.0375587	0.694915	0.0428571	0.00760456	0.0350877	1.08955	3.26087	1.33608	1.76144	1.20989	1.13755	1.14581	1.05824	1.21085	1.12832	1.13658	1.01606	1.23845	1.03829	1.00262	1.00686	1.80648	3.03126
2.25562e-239	1.3897	0.955	0.568	7.60055e-235	Pdpn+ TEC	Wls	234.119	2.9811	5.48189	2.84694	2.39292	1.69291	1.33371	1.72921	1.44137	0.336323	1.69484	3.0339	0.471429	0.475285	1.65789	3.13433	0.0434783	1.9763	2.67289	2.33941	1.91532	2.18914	1.3388	1.49802	1.73966	1.28139	1.7388	1.85389	1.27821	1.43119	1.43539	2.05315	1.06014
8.92275e-239	3.7798	0.385	0.028	3.00661e-234	Pdpn+ TEC	Serpinf1	233.522	0.311909	1.06476	0.0306122	0.0708263	0.0149857	0.0267857	0.100213	0.0162866	0	0.028169	0	0.0107143	0.0380228	0.245614	7.97015	0	1.12108	1.51319	1.02674	1.03841	1.00948	1.00631	1.03033	1.0133	1	1.01016	1	1.00218	1.0111	1.05769	2.90751	1
3.4176e-238	3.31647	0.479	0.066	1.1516e-233	Pdpn+ TEC	Smim1	232.939	0.601134	0.879254	0.22449	0.355818	0.0280685	0.0301339	0.0426439	0.0276873	0.0044843	0.140845	0.338983	0.0357143	0.0114068	1.54386	0.373134	0	1.23135	1.40121	1.14335	1.16757	1.01991	1.00881	1.01202	1.02182	1.00068	1.08073	1.11214	1.01043	1.00578	1.35158	1.16317	1
3.86615e-237	2.0523	0.827	0.311	1.30274e-232	Pdpn+ TEC	Igfbp4	231.885	0.644612	6.42261	0.57398	1.3204	2.0107	0.607143	0.129638	0.251629	0.376682	1.71831	0.152542	0.542857	0.258555	0.210526	18.3582	0.608696	1.27233	2.89712	1.43513	1.64033	2.26317	1.1549	1.04584	1.16728	1.30365	1.68289	1.0802	1.18237	1.16058	1.06033	3.92847	1.67753
5.79279e-237	2.30681	0.692	0.215	1.95194e-232	Pdpn+ TEC	Unc119	231.71	2.37618	1.8562	0.352041	0.913997	0.276879	0.392857	0.249893	0.140879	0.0538117	0.169014	0.440678	0.242857	0.174905	1.77193	0.104478	0.130435	1.73708	1.75774	1.23701	1.41769	1.20195	1.09115	1.06662	1.07467	1.03797	1.0756	1.14065	1.09258	1.10722	1.41758	1.04851	1.31732
3.02074e-236	1.94988	0.745	0.214	1.01787e-231	Pdpn+ TEC	AI646519	230.992	2.78828	1.91987	0.997449	1.45025	0.429353	0.238839	0.0469083	0.0211726	0.0134529	0.0187793	0.915254	0.0857143	0.0570342	0.333333	0.0597015	0	1.84459	1.8163	1.61717	1.60785	1.36086	1.0584	1.01636	1.01941	1.0148	1.00727	1.2689	1.03806	1.02888	1.08403	1.01803	1
4.19998e-231	3.35842	0.439	0.048	1.41523e-226	Pdpn+ TEC	Dlk2	225.849	0.372401	0.783754	0.170918	0.0337268	0.036156	0.0401786	0.214925	0.0211726	0	0	0	0.00714286	0.00760456	0.0263158	0.0149254	0	1.15196	1.37733	1.14635	1.01601	1.03109	1.01051	1.06609	1.01848	1	1	1	1.00195	1.00671	1.00437	1.00356	1
8.32924e-231	2.35626	0.63	0.139	2.80662e-226	Pdpn+ TEC	Xdh	225.552	0.398866	1.46762	0.306122	0.259696	0.227402	0.0658482	0.131343	0.53013	0.179372	0.126761	0.389831	0.0857143	0.026616	0	0.80597	1.13043	1.15589	1.69293	1.21848	1.15747	1.2215	1.02158	1.04482	1.31981	1.11841	1.07071	1.12701	1.04466	1.02014	1	1.29484	2.23911
4.67807e-230	2.62716	0.516	0.077	1.57632e-225	Pdpn+ TEC	Samd5	224.802	0.79206	1.12953	0.102041	0.419899	0.12607	0.0491071	0.0933902	0.0985342	0.0179372	0.0657277	0	0.0928571	0.0114068	0	0.0895522	0	1.29936	1.53522	1.08362	1.22168	1.1498	1.01829	1.03272	1.04795	1.02674	1.02758	1	1.04003	1.00581	1	1.07626	1
7.78919e-230	3.56842	0.395	0.033	2.62465e-225	Pdpn+ TEC	Aldh1a1	224.581	0.0340265	0.916575	0.191327	0.347386	0.0195052	0.0446429	0.204691	0.029316	0.00896861	0.0938967	1.13559	0.0535714	0	0	1.35821	0	1.01755	1.51218	1.12324	1.17214	1.02554	1.01281	1.08552	1.0131	1.00395	1.04079	1.32435	1.01761	1	1	1.5566	1
1.01843e-228	1.02057	0.984	0.744	3.43171e-224	Pdpn+ TEC	Ctsl	223.464	209.395	35.7497	8.45153	17.484	13.9039	7.05692	4.94456	2.49756	0.887892	1.55399	14.3729	2.89286	2.31179	17.1053	17.5821	3.47826	6.86867	4.84451	3.29927	3.9095	4.12967	2.19411	2.07078	2.00916	1.7039	1.66188	3.15023	1.87701	2.42506	2.7694	3.89756	3.3531
1.47527e-228	1.79412	0.734	0.209	4.97107e-224	Pdpn+ TEC	Pdpn	223.304	0.705104	2.1921	1.35204	2.69815	0.579448	0.368304	0.179531	0.102606	0.0044843	0.0234742	0.355932	0.0607143	0.0798479	0.149123	2.47761	0	1.2514	1.90098	1.77204	2.01297	1.45661	1.10362	1.06857	1.06459	1.00194	1.00974	1.13422	1.04498	1.03193	1.06461	1.77977	1
4.8777e-228	1.51838	0.936	0.453	1.64359e-223	Pdpn+ TEC	Mir100hg	222.784	5.24764	10.6389	1.80867	5.78246	3.91936	0.547991	0.141578	0.105049	0.179372	0.15493	0.949153	0.257143	0.102662	0.307018	2.80597	0	2.48756	3.49112	2.07759	2.86478	3.18795	1.2104	1.06441	1.10193	1.21226	1.088	1.29496	1.16684	1.07966	1.08906	2.10996	1
8.49927e-226	1.89107	0.785	0.279	2.86391e-221	Pdpn+ TEC	Dsc3	220.543	1.99622	2.44237	0.362245	0.676223	0.68078	0.658482	0.27548	0.287459	0.0044843	0.0422535	1.67797	0.0821429	0.0228137	0.00877193	0.0149254	0	1.69338	1.97543	1.28123	1.31415	1.5578	1.17322	1.08295	1.16698	1.0045	1.01775	1.45261	1.03395	1.01656	1.00143	1.00742	1
5.4347e-223	1.18821	0.984	0.847	1.83128e-218	Pdpn+ TEC	Myl6	217.737	17.6919	20.3041	10.5	16.14	7.25809	11.6362	9.31898	6.67101	4.56054	8.77934	22.5932	8.04286	6.15209	9.47368	16.7313	6.65217	3.65552	4.14218	3.63875	3.89772	3.34999	2.5973	2.55516	2.78268	2.74093	3.0912	3.74265	2.92887	3.01606	2.4762	4.05408	4.05085
6.40182e-222	1.46151	0.905	0.549	2.15716e-217	Pdpn+ TEC	H2-DMa	216.666	4.09074	4.2843	0.933673	1.95616	0.84372	3.88393	4.59403	1.97883	0.58296	0.849765	0.610169	0.425	1.11407	0.342105	0.223881	0.0434783	2.11478	2.44358	1.57355	1.81574	1.55921	1.70593	1.95991	1.73723	1.36791	1.37095	1.22617	1.25882	1.40539	1.08326	1.08064	1.06871
1.69533e-219	2.51398	0.595	0.129	5.71257e-215	Pdpn+ TEC	Mdga1	214.243	1.4121	1.58836	0.0688776	0.487352	0.224072	0.104911	0.163753	0.0651466	0.0224215	0.159624	0	0.189286	0.0304183	0.0701754	0.0895522	0	1.56393	1.74739	1.06345	1.26008	1.24607	1.02944	1.05833	1.04355	1.00991	1.09788	1	1.06508	1.01898	1.01462	1.04585	1
4.80493e-219	1.58051	0.896	0.556	1.61907e-214	Pdpn+ TEC	Ifi27	213.791	10.4499	6.86059	1.16071	7.44688	1.01284	3.02455	3.09339	2.47394	1.26457	4.03756	3.40678	2.28214	0.726236	11.7368	4.08955	1.26087	3.02534	2.87365	1.62822	2.89737	1.63776	1.59703	1.74366	1.92974	1.72649	2.27661	1.86594	1.79974	1.58425	2.70497	2.47104	2.14707
1.09817e-217	2.86752	0.609	0.181	3.70038e-213	Pdpn+ TEC	Cdh11	212.432	0.198488	2.90121	0.0943878	0.320405	0.33373	0.758929	0.4742	0.295603	0.0941704	0.0234742	0.186441	0.364286	0.0152091	0.0614035	2.26866	0	1.103	2.21138	1.08323	1.1873	1.36431	1.20489	1.16922	1.1907	1.09167	1.01054	1.07726	1.19735	1.00886	1.02415	1.70457	1
6.52242e-214	1.30054	0.935	0.683	2.1978e-209	Pdpn+ TEC	Myl12a	208.658	7.10586	7.22503	4.29592	7.09949	2.21147	4.51339	3.05288	2.33225	1.47982	1.39906	7.66102	1.97143	2.82129	2.42105	4.80597	3.56522	2.59883	2.91931	2.5329	2.88716	2.13974	1.80925	1.7106	1.87259	1.84503	1.54505	2.5235	1.59816	2.39634	1.54687	2.65685	3.34506
4.68001e-213	1.3016	0.924	0.664	1.57698e-208	Pdpn+ TEC	Hmgn1	207.802	8.97543	8.06147	2.16327	5.7285	2.22526	16.6317	3.71301	1.01059	0.273543	2.58685	3.45763	2.96429	2.05703	6.02632	3.58209	0.652174	2.82939	2.99938	2.01603	2.64766	2.16956	2.89887	1.79304	1.45734	1.21597	1.96172	1.8158	1.80772	2.03108	2.10047	2.31859	1.71017
1.42158e-211	1.81694	0.791	0.366	4.79015e-207	Pdpn+ TEC	Rras	206.32	2.09641	2.65862	0.979592	1.37437	0.74215	0.569196	0.487846	0.311075	0.143498	0.633803	1.47458	0.525	0.159696	0.631579	2.64179	1.65217	1.67657	2.02818	1.55168	1.67527	1.50961	1.13655	1.13517	1.16807	1.12014	1.30486	1.4672	1.18827	1.0842	1.15305	2.03718	2.40219
5.90091e-211	1.54632	0.867	0.404	1.98837e-206	Pdpn+ TEC	Pax1	205.702	9.28922	3.66081	2.13776	3.11298	0.690057	1.20312	1.18806	0.172638	0.0224215	0.328638	2.42373	0.514286	0.0874525	1.57895	0.0597015	0	2.84609	2.26425	2.06012	2.05955	1.571	1.2799	1.31527	1.09208	1.02963	1.15878	1.64129	1.25486	1.05157	1.3641	1.02186	1
4.40522e-210	1.86396	0.801	0.39	1.48438e-205	Pdpn+ TEC	Niban1	204.828	1.59924	3.32053	0.507653	1.40641	0.488107	0.909598	1.67164	1.10261	0.596413	0.225352	1.32203	0.285714	0.258555	0.438596	0.656716	0.130435	1.58009	2.2277	1.33547	1.63577	1.47411	1.21527	1.50216	1.53774	1.43986	1.11085	1.39132	1.18236	1.11514	1.11551	1.44134	1.1795
1.78369e-209	2.25933	0.644	0.183	6.01031e-205	Pdpn+ TEC	Gm1673	204.221	1.22117	1.62569	0.0663265	0.671164	0.332303	0.678571	0.168017	0.0211726	0	0.2723	0.152542	0.510714	0.0418251	1.33333	0.402985	0.173913	1.43749	1.68677	1.04436	1.31415	1.25328	1.15044	1.05134	1.01471	1	1.15644	1.05765	1.16292	1.02945	1.32604	1.2121	1.24546
3.65747e-209	1.36528	0.935	0.578	1.23242e-204	Pdpn+ TEC	Atp1a1	203.909	2.82798	5.37541	3.45153	3.31535	1.47431	1.53906	1.17399	1.62866	0.587444	4.37559	17.7797	1.09643	0.958175	1.44737	0.701493	0.347826	1.91507	2.66472	2.46218	2.16217	2.11598	1.37735	1.34423	1.8209	1.37361	2.32993	3.46623	1.50192	1.68024	1.38375	1.35076	1.4227
6.54767e-209	2.78954	0.474	0.07	2.2063e-204	Pdpn+ TEC	Snhg18	203.656	0.268431	0.844127	0.538265	0.44688	0.0461465	0.0569196	0.0486141	0.00814332	0.152466	0.0187793	0	0.317857	0	1.18421	2.89552	0.0434783	1.10312	1.39322	1.27922	1.23026	1.0304	1.01572	1.01595	1.00407	1.16767	1.0061	1	1.19476	1	1.27495	2.03504	1.05222
9.8409e-208	1.15119	0.99	0.859	3.31599e-203	Pdpn+ TEC	Ifitm3	202.479	60.1456	64.7783	51.7883	46.2968	33.5716	63.115	10.5002	20.5651	2.0583	11.4601	55.0339	9.05357	2.37262	27.5877	36.6866	14.087	5.21962	5.77615	5.79024	5.30204	5.26135	4.57301	2.65771	4.08045	1.95845	3.22227	4.91703	2.64633	1.95757	3.62723	4.96874	4.95593
1.34513e-207	2.66868	0.537	0.11	4.53253e-203	Pdpn+ TEC	Megf6	202.344	0.340265	1.10757	0.0459184	0.0168634	0.104662	0.354911	0.203412	0.147394	0.318386	0.0234742	0.20339	0.0107143	0.0152091	0.0175439	0.0298507	0	1.17741	1.53316	1.03615	1.01263	1.11252	1.10494	1.08124	1.12023	1.32728	1.02555	1.0617	1.00547	1.01329	1.00392	1.03375	1
4.34413e-207	2.17534	0.679	0.25	1.4638e-202	Pdpn+ TEC	Isoc1	201.835	1.65595	1.85181	0.484694	1.09949	0.322312	1.05134	0.16162	0.131922	0.107623	0.403756	1.37288	0.464286	0.323194	0.903509	0.462687	0.217391	1.53866	1.78777	1.33278	1.47664	1.24668	1.23084	1.04669	1.05815	1.09119	1.19401	1.36318	1.25511	1.24965	1.21667	1.19446	1.25575
5.55145e-207	3.50856	0.378	0.035	1.87061e-202	Pdpn+ TEC	Gnai1	201.728	0.149338	0.638858	0.191327	0.0269815	0.0378211	0.0725446	0.0528785	0.00977199	0.0044843	0.0704225	0.169492	0.221429	0	0.0350877	0.492537	0	1.07222	1.32508	1.12288	1.01311	1.03188	1.01733	1.01754	1.00619	1.00333	1.03042	1.0427	1.14255	1	1.00951	1.22013	1
5.92772e-207	1.52169	0.84	0.488	1.9974e-202	Pdpn+ TEC	Eid1	201.7	3.06238	3.36114	0.640306	3.15852	0.527117	3.41406	2.28614	0.614821	0.618834	2.89671	2.86441	1.94643	0.676806	3.44737	2.74627	0.913043	1.89996	2.19049	1.41679	2.1049	1.38285	1.6335	1.53494	1.25752	1.42404	2.02176	1.75116	1.63536	1.48217	1.71749	2.1338	1.93444
1.15192e-206	1.55862	0.862	0.41	3.8815e-202	Pdpn+ TEC	Hexb	201.411	7.2552	4.05488	1.02551	3.1231	1.26237	0.59375	0.77484	0.415309	0.121076	0.244131	12.339	0.317857	0.593156	0.701754	0.880597	0.347826	2.65046	2.37766	1.60164	2.0607	1.81312	1.15335	1.2243	1.21921	1.10148	1.13058	3.01562	1.13748	1.28147	1.16767	1.45037	1.37323
1.245e-206	2.15197	0.664	0.213	4.19515e-202	Pdpn+ TEC	Degs1	201.377	0.625709	1.50823	0.410714	1.47049	0.173168	0.569196	0.28742	0.36645	0.152466	0.431925	1.11864	0.0642857	0.51711	0.149123	1.53731	0.695652	1.22356	1.65785	1.28111	1.60288	1.12822	1.13303	1.08321	1.18915	1.09549	1.24193	1.37766	1.03112	1.35366	1.03792	1.76572	1.78067
9.31841e-206	1.5089	0.903	0.496	3.13993e-201	Pdpn+ TEC	Pik3r1	200.503	2.04159	4.35236	2.09439	1.30691	1.30067	1.64844	0.673348	0.732899	0.300448	1.65728	1.0678	1.23214	1.50951	0.482456	2.68657	0.0869565	1.73283	2.50716	2.10381	1.59683	2.05642	1.3864	1.2419	1.39824	1.25067	1.68256	1.32593	1.53129	2.00267	1.15033	2.07815	1.10967
4.89819e-205	1.17856	0.935	0.686	1.65049e-200	Pdpn+ TEC	Bsg	199.782	5.38374	7.27003	6.99235	7.43339	1.39486	9.02455	6.26994	2.78176	1.27354	7.83099	12.2034	3.31429	1.3384	9.48246	5.25373	2.13043	2.33962	2.91246	2.88568	2.89154	1.83643	2.31119	2.17682	1.95415	1.67951	2.92704	3.04639	1.92875	1.72404	2.4622	2.74935	2.68251
4.20667e-204	1.99769	0.633	0.159	1.41748e-199	Pdpn+ TEC	Angpt1	198.848	0.786389	1.91438	1.69643	0.146712	0.492864	0.135045	0.339446	0.113192	0.0044843	0.0375587	1.61017	0.107143	0.311787	0.105263	0.776119	0	1.34738	1.88498	1.91539	1.09497	1.44087	1.05242	1.10839	1.06171	1.00555	1.0273	1.42442	1.03572	1.29608	1.0637	1.42579	1
5.87101e-203	4.2496	0.317	0.02	1.97829e-198	Pdpn+ TEC	Fbln7	197.704	0.117202	0.485181	0.0255102	0.0472175	0.0225975	0.0100446	0.0149254	0.00407166	0	0	0.0169492	0.00714286	0.00380228	0.280702	0.38806	0	1.04661	1.2446	1.01865	1.02267	1.0174	1.002	1.00457	1.00133	1	1	1.00466	1.00213	1.00109	1.07443	1.22552	1
3.73112e-202	1.52518	0.838	0.348	1.25724e-197	Pdpn+ TEC	Amotl1	196.901	2.01701	2.76948	0.681122	1.13828	0.928639	0.587054	0.418337	0.175081	0.0358744	0.14554	0.677966	0.210714	0.0494297	0.438596	1.46269	0.217391	1.69886	2.10438	1.48336	1.54575	1.83208	1.1544	1.13105	1.12094	1.04916	1.06242	1.20141	1.08451	1.0329	1.11951	1.58693	1.32726
4.75797e-202	1.01484	0.952	0.781	1.60325e-197	Pdpn+ TEC	Pfdn5	196.795	8.93195	9.33919	3.61735	9.60034	2.80257	10.3069	7.65117	4.00814	2.0583	7.38967	12.661	5.075	3.75285	12.9123	5.02985	2.95652	2.87878	3.2352	2.40066	3.19231	2.44421	2.45216	2.36338	2.31658	2.06882	2.86336	3.04953	2.44506	2.57474	2.80342	2.61831	3.05372
8.71169e-202	3.53008	0.379	0.038	2.93549e-197	Pdpn+ TEC	Nell2	196.532	0.26465	0.783754	0.00510204	0.079258	0.0620837	0.0379464	0.0955224	0.0114007	0.0403587	0.0187793	0.0169492	0.0107143	0	0	0.0149254	0	1.11797	1.39824	1.00454	1.05033	1.05742	1.01688	1.03185	1.00478	1.04178	1.00899	1.00285	1.00706	1	1	1.00356	1
1.0396e-201	1.6567	0.709	0.217	3.50305e-197	Pdpn+ TEC	Rgcc	196.456	6.41777	3.49286	0.331633	2.20067	0.364891	0.378348	0.8371	0.754886	0.125561	0.131455	1.57627	0.603571	4.86312	0.122807	0.373134	8.91304	2.52817	2.2439	1.28986	1.81274	1.39151	1.11892	1.2844	1.40196	1.10192	1.08479	1.43262	1.23565	3.01155	1.02259	1.25226	4.42659
1.83536e-201	2.19299	0.652	0.221	6.18442e-197	Pdpn+ TEC	Stk26	196.209	0.826087	1.5225	0.168367	0.48398	0.247859	0.83817	0.414072	0.105863	0.0538117	0.103286	0.322034	0.0928571	0.418251	0.210526	0.0149254	0	1.33235	1.66972	1.13595	1.20863	1.22247	1.19109	1.12146	1.06666	1.05891	1.04867	1.09356	1.04414	1.39515	1.06534	1.00356	1
8.12611e-201	1.36889	0.925	0.593	2.73818e-196	Pdpn+ TEC	Hif1a	195.563	3.16068	5.16136	1.21173	1.45194	1.87274	2.61942	1.21834	0.843648	0.210762	1.47418	1.61017	0.932143	0.863118	1.25439	1.02985	0.173913	2.05192	2.60515	1.753	1.62464	2.25482	1.55918	1.38761	1.42553	1.16776	1.61156	1.44657	1.46279	1.67687	1.31905	1.4929	1.27644
2.7054e-200	1.354	0.905	0.444	9.11611e-196	Pdpn+ TEC	Palld	195.04	4.37996	5.45554	2.03316	3.24621	1.86608	0.690848	0.573561	0.408795	0.246637	1.31925	1.32203	0.210714	0.110266	1.34211	1.28358	0.0869565	2.20074	2.64325	2.12145	2.31093	2.33499	1.23352	1.20914	1.26604	1.24532	1.6231	1.46825	1.10735	1.07282	1.44732	1.63292	1.28294
3.90947e-199	1.9212	0.729	0.265	1.31733e-194	Pdpn+ TEC	Adk	193.88	0.797732	1.93085	0.354592	0.548061	0.414843	1.18415	0.528358	0.135993	0.0403587	0.389671	0.79661	0.410714	0.48289	1.07018	1.91045	0.0434783	1.30725	1.84798	1.27189	1.25671	1.39601	1.27522	1.15813	1.08675	1.02892	1.21109	1.21891	1.19714	1.30158	1.30548	1.82019	1.05205
9.25047e-198	1.51535	0.857	0.502	3.11704e-193	Pdpn+ TEC	Ucp2	192.506	2.52174	4.2371	2.07143	2.9882	0.943863	2.29911	1.17058	0.714984	1.24215	3.06573	8.16949	2.33929	3.13688	2.5614	0.41791	1.21739	1.77504	2.38064	2.0231	2.01865	1.67724	1.4757	1.30332	1.36269	1.85522	2.04525	2.51952	1.69056	2.47171	1.55521	1.2038	2.38806
3.51253e-197	1.28562	0.913	0.539	1.18358e-192	Pdpn+ TEC	Perp	191.927	7.8242	5.98793	2.24745	6.76728	2.12583	3.03125	1.17484	3.34853	0.55157	0.460094	6.25424	0.896429	0.121673	0.798246	0.313433	0	2.61585	2.71905	2.11663	2.76663	2.13156	1.62027	1.30279	2.11902	1.34316	1.21141	2.32925	1.34568	1.07793	1.20134	1.16162	1
7.91638e-196	2.02475	0.763	0.312	2.66751e-191	Pdpn+ TEC	Nedd4l	190.574	1.08696	3.93085	3.47194	2.24452	0.471218	0.537946	0.379531	0.562704	0.309417	1.96244	5.05085	1.25	1.10266	0.377193	0.746269	0.173913	1.5048	2.43753	2.49575	1.84824	1.53898	1.17188	1.15103	1.35041	1.29102	1.83126	2.19912	1.86263	1.86228	1.09133	1.5173	1.19381
3.46763e-195	1.68032	0.587	0.137	1.16845e-190	Pdpn+ TEC	Ndrg2	189.932	0.342155	1.46323	0.206633	5.89713	0.0939581	0.11942	0.407676	0.109935	0.0134529	0.117371	0.59322	0.0678571	0.0304183	0.131579	1.47761	0.0434783	1.13287	1.64185	1.14615	2.68128	1.08277	1.03181	1.11223	1.06251	1.00495	1.07329	1.17439	1.03187	1.0293	1.03445	1.81555	1.05222
3.89641e-194	1.10046	0.941	0.713	1.31293e-189	Pdpn+ TEC	Eef1d	188.882	6.02836	7.05379	2.84949	6.29005	1.86822	14.2478	6.69041	2.42508	0.802691	2.80282	7.72881	2.60357	2.29658	5.80702	3.86567	1.21739	2.46404	2.92036	2.26078	2.7851	2.04873	2.73609	2.22174	1.87645	1.49402	2.04016	2.54503	1.81322	2.04557	2.07559	2.41478	2.14729
5.20425e-193	1.98388	0.523	0.103	1.75362e-188	Pdpn+ TEC	Pla2g7	187.756	1.41588	1.79693	0.40051	3.46374	0.0765937	0.0412946	0.145842	0.034202	0.0044843	0.00938967	4.64407	0.707143	0.0570342	23.7982	0.686567	0	1.46665	1.73176	1.25401	2.0594	1.07978	1.01454	1.04534	1.02022	1.00942	1.00509	2.03275	1.23857	1.01966	3.47009	1.27043	1
6.41234e-192	1.80167	0.783	0.42	2.1607e-187	Pdpn+ TEC	Dnajc13	186.665	2.06994	3.23381	0.632653	0.548061	0.496194	0.960938	1.04691	0.694625	0.816143	0.737089	0.847458	1	0.425856	0.719298	0.61194	0.0869565	1.74626	2.18368	1.42568	1.29553	1.53217	1.24342	1.34693	1.39895	1.70196	1.3487	1.23961	1.60739	1.36823	1.26276	1.32937	1.10226
1.48354e-190	5.14164	0.259	0.011	4.99893e-186	Pdpn+ TEC	2310065F04Rik	185.301	0.139887	0.482986	0	0.0303541	0.00523311	0.00334821	0.0200426	0	0	0	0	0.0142857	0	0.0614035	0.0298507	0	1.05656	1.23645	1	1.01719	1.00555	1.00064	1.00635	1	1	1	1	1.00398	1	1.01285	1.00712	1
9.72141e-190	1.35353	0.941	0.537	3.27573e-185	Pdpn+ TEC	Trp63	184.485	4.68809	8.03074	1.65051	0.731872	3.26879	1.17076	0.809808	1.75081	0.367713	0.338028	0.40678	0.403571	0.117871	0.192982	0.223881	0	2.48527	3.13661	2.00072	1.35829	2.90891	1.35615	1.31836	1.92483	1.27561	1.18131	1.17057	1.27345	1.10303	1.05589	1.06934	1
2.16369e-186	1.78052	0.84	0.391	7.29076e-182	Pdpn+ TEC	Igfbp5	181.137	12.8885	17.0527	1.24745	4.77403	5.53473	0.850446	0.347548	0.359121	0.0941704	16.9859	3.37288	7.27857	0.114068	0.578947	5.55224	0.304348	3.44561	3.90141	1.73615	2.5237	3.20706	1.26053	1.13666	1.22144	1.09394	3.72855	1.81439	2.52177	1.10133	1.10875	2.79403	1.41089
5.13386e-186	2.07565	0.643	0.215	1.7299e-181	Pdpn+ TEC	Smco4	180.762	1.43289	1.48847	0.520408	1.75042	0.118459	0.909598	0.261407	0.175896	0.0493274	0.605634	2.76271	0.182143	0.190114	3.41228	0.537313	2.73913	1.466	1.6586	1.29895	1.67445	1.09996	1.20543	1.07425	1.09109	1.02621	1.2721	1.76133	1.07642	1.13632	1.72298	1.26622	2.90742
8.46555e-186	1.06334	0.96	0.742	2.85255e-181	Pdpn+ TEC	Selenow	180.545	5.25142	8.95499	3.84694	7.35919	2.44672	11.4676	9.67292	3	1.48879	4.53052	9.27119	6.35357	2.89734	6.5	8.32836	3.47826	2.33684	3.17271	2.50238	2.96299	2.30616	2.5336	2.55874	2.04129	1.9555	2.38409	2.71108	2.5763	2.48342	2.1621	3.23803	3.30301
1.09984e-185	1.19839	0.861	0.381	3.70604e-181	Pdpn+ TEC	Hpgd	180.431	12.9868	8.01647	1.25765	4.41147	4.20076	0.801339	0.254584	0.605863	0.340807	4.16901	0.305085	0.525	0.136882	0.289474	0.104478	0	3.28579	3.05336	1.84336	2.45045	2.89107	1.20624	1.0861	1.27329	1.25045	2.18577	1.13202	1.16575	1.08863	1.06377	1.03747	1
1.15898e-185	4.09	0.315	0.025	3.9053e-181	Pdpn+ TEC	Fmod	180.408	0.0132325	0.796926	0.0433673	0.124789	0.076118	0.00334821	0.0315565	0.002443	0	0.0187793	0.0169492	0	0	0	0.0447761	0	1.00609	1.46002	1.03846	1.09971	1.06031	1.00059	1.00818	1.00136	1	1.00457	1.00687	1	1	1	1.02851	1
2.25939e-185	1.53987	0.834	0.374	7.61323e-181	Pdpn+ TEC	Cobl	180.118	1.97543	3.54226	3.8699	2.02024	0.847764	0.434152	0.559488	0.736971	0.233184	0.460094	1.79661	0.360714	0.0874525	0.394737	0.0746269	0.0434783	1.77214	2.33345	2.68862	1.85879	1.81304	1.13634	1.21358	1.44675	1.13991	1.27233	1.51227	1.19241	1.05676	1.14	1.03463	1.08258
3.49182e-185	2.31103	0.581	0.141	1.1766e-180	Pdpn+ TEC	F3	179.929	0.52552	2.89133	5.27551	0.844857	0.488344	0.078125	0.0579957	0.167752	0.0044843	0.0751174	4.69492	0.0357143	0.0114068	0.903509	1.02985	0.0434783	1.2081	2.12817	2.83153	1.39458	1.36375	1.02496	1.01966	1.08251	1.01249	1.0214	2.13947	1.01089	1.00359	1.21452	1.62586	1.05205
5.1754e-185	1.07699	0.943	0.696	1.7439e-180	Pdpn+ TEC	Selenof	179.758	8.17769	7.86828	2.47704	6.63912	2.62678	11.3973	8.01322	2.2728	1.20179	2.41315	8.57627	2.18214	1.48289	7.32456	7.65672	2.95652	2.72572	3.01114	2.05598	2.79521	2.24763	2.52907	2.36977	1.78159	1.67257	1.85716	2.63123	1.64394	1.83581	2.25096	3.13756	3.01247
5.93858e-185	3.47421	0.308	0.022	2.00106e-180	Pdpn+ TEC	Abca8b	179.699	0.0680529	0.555434	0.0918367	0.111298	0.0283064	0.015625	0.0144989	0.000814332	0.0179372	0.0187793	0	0	0	0.0614035	1.44776	0	1.02915	1.30506	1.07282	1.06859	1.03555	1.00362	1.00537	1.00125	1.01232	1.01434	1	1	1	1.02444	1.91483	1
7.78403e-185	1.61786	0.899	0.556	2.62291e-180	Pdpn+ TEC	Atp1b1	179.581	3.569	10.9111	10.4464	17.3002	1.16032	1.41741	2.92623	4.45521	6.64126	9.99531	27.339	4.025	0.543726	0.324561	0.746269	0	1.99811	3.40948	3.54505	3.8915	1.85627	1.36257	1.7164	2.44072	3.19046	3.17619	3.93323	2.43771	1.5212	1.08847	1.34837	1
1.24675e-184	1.77654	0.668	0.204	4.20104e-180	Pdpn+ TEC	Ephx1	179.377	0.827977	1.39407	0.834184	2.5312	0.173168	0.235491	0.416631	0.421824	0.0896861	0.450704	1.66102	0.0607143	0.0874525	0.921053	0.925373	0.565217	1.30937	1.66184	1.52513	1.92247	1.16068	1.06718	1.11993	1.22856	1.10143	1.20957	1.55754	1.05454	1.08324	1.22306	1.41415	1.77567
3.22663e-184	1.81945	0.61	0.161	1.08724e-179	Pdpn+ TEC	Fst	178.964	0.249527	4.31065	0.229592	0.172007	2.23501	0.0691964	0.0682303	0.026873	0.00896861	0.164319	0.288136	0.05	0.0380228	0.0438596	0.731343	0	1.11979	2.50839	1.17512	1.12016	2.23711	1.02665	1.0203	1.02176	1.0193	1.03246	1.10539	1.02482	1.04887	1.01677	1.46486	1
5.93911e-183	1.79863	0.74	0.379	2.00124e-178	Pdpn+ TEC	Lsm3	177.699	1.83743	2.42591	0.545918	1.24283	0.412464	3.83817	0.543284	0.457655	0.215247	0.530516	1.10169	0.739286	0.779468	0.719298	0.641791	0.26087	1.62491	1.94193	1.34896	1.56057	1.31513	1.68985	1.15695	1.22576	1.1376	1.23624	1.32765	1.27077	1.53528	1.19899	1.37228	1.55119
2.4292e-182	1.42114	0.622	0.175	8.18543e-178	Pdpn+ TEC	Kcnh1	177.087	1.17958	1.67289	0.510204	0.259696	0.592293	0.0200893	0.14968	0.180782	0.367713	0.0892019	0.372881	0.110714	0.0152091	0.0175439	0	0	1.5856	1.79256	1.41715	1.13119	1.64185	1.00508	1.06873	1.12531	1.3528	1.05553	1.13018	1.05891	1.00826	1.00292	1	1
8.41707e-182	2.19241	0.537	0.119	2.83622e-177	Pdpn+ TEC	Itga1	176.547	0.281664	1.43249	0.257653	0.146712	0.255709	0.0513393	0.191898	0.48127	0.201794	0.131455	0.118644	0.0285714	0.0380228	0.149123	2.08955	2.78261	1.13159	1.6942	1.17861	1.10213	1.23537	1.01589	1.07728	1.32338	1.19981	1.07124	1.0344	1.02511	1.02768	1.04404	2.06156	3.10984
4.31163e-181	1.82102	0.655	0.197	1.45285e-176	Pdpn+ TEC	St3gal6	175.838	3.0775	1.6685	0.681122	1.1231	0.131304	0.126116	0.61194	0.48127	0.0538117	2.38967	1.77966	0.367857	0.1673	0.0614035	0.164179	1.21739	1.91095	1.72819	1.40074	1.4669	1.1299	1.03755	1.19134	1.2388	1.039	1.87565	1.53418	1.28692	1.15294	1.01208	1.08158	2.1378
7.82478e-181	1.35668	0.868	0.437	2.63664e-176	Pdpn+ TEC	Phlda3	175.579	4.06994	3.46432	1.03827	2.20573	1.17935	1.54911	1.09552	1.9772	0.636771	0.859155	0.983051	0.282143	0.152091	0.315789	1.85075	0.0869565	2.0937	2.23854	1.64369	1.92222	1.73027	1.34686	1.29812	1.7674	1.45538	1.38757	1.35366	1.14947	1.19003	1.06477	1.96438	1.16028
1.08543e-180	3.68445	0.297	0.02	3.65745e-176	Pdpn+ TEC	Ntf3	175.437	0.047259	0.48079	0.132653	0.29511	0.0135585	0.00334821	0.0712154	0.000814332	0	0	0.135593	0	0	0	0.0895522	0.434783	1.01672	1.27018	1.1123	1.14046	1.01161	1.00383	1.02179	1.00111	1	1	1.03923	1	1	1	1.05742	1.39345
2.74932e-180	1.51679	0.516	0.107	9.2641e-176	Pdpn+ TEC	Frmpd4	175.033	0.228733	2.92206	0.767857	2.09275	0.171028	0.183036	0.952665	0.110749	0.318386	1.64319	0.59322	16.9107	0.00760456	0.131579	0.0597015	0	1.10607	2.21913	1.56716	1.93376	1.1986	1.05826	1.36886	1.08512	1.09254	1.53439	1.19196	4.54859	1.01577	1.03902	1.01847	1
5.94145e-180	2.30703	0.48	0.089	2.00203e-175	Pdpn+ TEC	Diras2	174.699	1.75425	1.03732	0.104592	0.220911	0.178639	0.0234375	0.0379531	0.0333876	0	0.0140845	0.0338983	0.00357143	0	0.0438596	0.0149254	0	1.62862	1.49359	1.09048	1.10406	1.17167	1.0087	1.01352	1.02521	1	1.00675	1.02026	1.00225	1	1.00723	1.02356	1
9.72687e-180	1.61917	0.787	0.321	3.27757e-175	Pdpn+ TEC	Lamb1	174.484	1.6465	2.94292	0.553571	1.75379	0.874167	0.293527	0.244776	0.28013	0.484305	0.107981	0.423729	0.785714	0.0304183	0.263158	3.19403	0.391304	1.70318	2.17154	1.41886	1.75867	1.8095	1.08657	1.09116	1.17207	1.4031	1.05682	1.16595	1.39192	1.02529	1.0747	1.98355	1.41452
1.28317e-179	1.70832	0.607	0.163	4.32377e-175	Pdpn+ TEC	Wwc2	174.364	0.508507	1.21186	1.18622	0.376054	0.343958	0.0714286	0.028145	0.0724756	0.0224215	0.056338	0.677966	0.253571	0.0646388	0.578947	0.985075	0.478261	1.23231	1.60238	1.72009	1.21247	1.35574	1.02515	1.01448	1.05185	1.02693	1.0273	1.22452	1.14923	1.04535	1.17574	1.56351	1.50923
2.70086e-179	1.31111	0.902	0.49	9.10081e-175	Pdpn+ TEC	Gsn	174.041	2.26276	10.2953	3.43878	21.3406	3.20861	0.84375	0.924947	1.76873	0.183857	0.690141	3.62712	0.853571	1.20913	0.0438596	117.91	0	1.72128	3.40853	2.55231	4.24018	2.65053	1.25645	1.26047	1.77876	1.14308	1.33802	1.94898	1.43527	1.66359	1.00932	6.43966	1
8.12602e-179	3.46542	0.352	0.039	2.73815e-174	Pdpn+ TEC	Fjx1	173.563	0.10397	0.711306	0.155612	0.173693	0.0306851	0.0814732	0.110448	0.0643322	0.0134529	0.0422535	0	0.0107143	0.0342205	0.00877193	0.164179	0.0434783	1.03959	1.33029	1.12709	1.08652	1.02624	1.0204	1.03066	1.02827	1.01206	1.0136	1	1.00276	1.03724	1.00318	1.03765	1.05394
8.61991e-179	1.89927	0.532	0.118	2.90456e-174	Pdpn+ TEC	Vwa1	173.537	0.376181	1.08452	0.107143	0.107926	0.40176	0.167411	0.0119403	0.00814332	0.0224215	0.028169	0.0169492	0.0214286	0.00380228	0.0175439	3.53731	1.04348	1.16909	1.50439	1.08902	1.05721	1.28998	1.04291	1.00377	1.00846	1.03025	1.02255	1.00638	1.0064	1.00375	1.00634	2.7482	2.01904
1.35127e-177	1.27533	0.847	0.381	4.55325e-173	Pdpn+ TEC	Sntb2	172.342	2.29868	3.21844	1.08418	1.82968	1.18863	0.542411	0.267804	0.269544	0.38565	0.610329	0.881356	0.3	0.0912548	0.5	3.38806	0.73913	1.80076	2.19415	1.72179	1.82327	2.00829	1.18089	1.09387	1.18465	1.40751	1.30091	1.25334	1.18219	1.06006	1.19067	2.03943	1.69128
2.23289e-176	1.21236	0.9	0.638	7.52396e-172	Pdpn+ TEC	Bri3	171.124	5.11531	4.6663	2.71684	3.1602	1.21408	3.64062	2.80938	1.90554	2.10762	3.83099	8.27119	2.61786	0.984791	2.89474	2.64179	1.08696	2.29374	2.48507	2.22125	2.13803	1.76839	1.68147	1.66405	1.75803	2.09536	2.18551	2.57026	1.86336	1.56561	1.617	2.09228	2.03524
3.12945e-176	1.10462	0.957	0.596	1.0545e-171	Pdpn+ TEC	Anxa2	170.977	9.27032	9.73765	8.03571	15.0169	4.85157	2.1183	2.40938	2.35586	1.98206	1.47887	8.57627	3.71429	2.69962	4.94737	6.55224	2.69565	2.87868	3.32459	3.34727	3.75182	2.81748	1.52931	1.6182	1.88206	2.22914	1.61972	2.62246	2.19455	2.18217	1.90949	2.96682	2.90714
9.57239e-176	1.72103	0.403	0.063	3.22551e-171	Pdpn+ TEC	Sema5a	170.491	0.0378072	0.909989	1.34694	0.0674536	0.0440057	0.0245536	0.13049	0.0545603	0.286996	0.178404	0.135593	3.97143	0.0152091	0.0350877	2.01493	0	1.01652	1.48002	1.85413	1.04125	1.05009	1.00679	1.04401	1.02057	1.24535	1.07775	1.04886	2.75419	1.02568	1.00988	1.94291	1
1.63989e-175	2.13766	0.446	0.079	5.52577e-171	Pdpn+ TEC	Tns4	170.258	0.175803	0.805708	0.375	0.0809444	0.176736	0.03125	0.0268657	0.0513029	0	0.0328638	0.0169492	0.0178571	0	0.00877193	0.0298507	0	1.09607	1.42156	1.25937	1.04408	1.2188	1.01101	1.01083	1.03837	1	1.01344	1.00713	1.00764	1	1.00143	1.00712	1
6.39556e-174	1.17382	0.887	0.622	2.15505e-169	Pdpn+ TEC	Srp14	168.667	5.94518	4.91218	1.34184	4.47386	0.870124	6.0067	4.47846	2.12296	1.25112	2.97653	9.33898	5.52143	1.62738	4.42982	2.35821	0.695652	2.37426	2.50006	1.69424	2.36215	1.57174	1.97769	1.91858	1.78554	1.73915	1.99671	2.72862	2.36505	1.95172	1.8717	1.96218	1.80317
2.53012e-173	1.69209	0.816	0.384	8.52549e-169	Pdpn+ TEC	Fgf13	168.069	1.69187	5.77497	1.28061	1.36256	1.47716	0.771205	1.34627	1.3184	0.695067	1.28169	2.08475	1.07857	0.250951	0.0526316	0.253731	0.304348	1.67931	2.80121	1.78647	1.65163	2.22539	1.22831	1.45914	1.7336	1.44161	1.64765	1.61025	1.4101	1.20069	1.01855	1.202	1.23994
1.9731e-172	1.65645	0.755	0.348	6.64855e-168	Pdpn+ TEC	Cd151	167.177	1.84688	2.09879	0.709184	1.9747	0.571598	1.4308	0.461834	0.257329	0.139013	0.309859	2.55932	0.614286	0.0760456	1	2.04478	1.43478	1.60086	1.84751	1.39927	1.80842	1.38322	1.3044	1.12668	1.12266	1.11774	1.1472	1.67279	1.19749	1.06063	1.23279	1.93884	2.2452
1.10174e-171	2.05734	0.568	0.154	3.71241e-167	Pdpn+ TEC	Rgs10	166.43	0.311909	1.13611	0.0994898	0.352445	0.117983	0.402902	0.459701	0.228827	0.0986547	0.0375587	0.101695	0.0214286	1.85551	0.754386	0.447761	0.173913	1.13203	1.54052	1.08115	1.16084	1.09633	1.09063	1.13977	1.12567	1.09418	1.02239	1.04264	1.01338	2.22583	1.20314	1.20229	1.27379
2.22313e-171	2.34147	0.494	0.105	7.49106e-167	Pdpn+ TEC	Igfbp2	166.125	0.793951	2.11636	0.107143	0.121417	0.674596	0.375	0.550107	0.0594463	0.00896861	0.0234742	0.0508475	0.0321429	0.0114068	0.0175439	0.41791	0	1.32837	1.86424	1.07131	1.0618	1.39315	1.08929	1.1439	1.03842	1.00828	1.00998	1.01869	1.01261	1.00926	1.00631	1.16828	1
1.77347e-169	2.06147	0.607	0.227	5.97588e-165	Pdpn+ TEC	Zfyve21	164.224	2.5482	1.29528	0.219388	0.689713	0.140343	0.645089	0.432409	0.161238	0.0313901	0.230047	0.305085	0.25	0.209125	0.464912	0.746269	0	1.7488	1.57415	1.1429	1.33291	1.10364	1.14147	1.1179	1.08473	1.0209	1.1127	1.10492	1.09867	1.13597	1.12279	1.44695	1
2.23469e-169	2.15383	0.464	0.088	7.53001e-165	Pdpn+ TEC	Fmo1	164.123	1.0397	0.901207	0.102041	0.602024	0.111085	0.0446429	0.248188	0.0635179	0.00896861	0.0187793	0.186441	0.0178571	0.00380228	0.105263	0.477612	0.695652	1.37338	1.41996	1.05707	1.32714	1.10218	1.01643	1.09614	1.0307	1.01258	1.00623	1.04693	1.01075	1.00215	1.01736	1.24363	1.82914
9.75649e-169	2.68178	0.407	0.063	3.28755e-164	Pdpn+ TEC	Vldlr	163.483	0.417769	0.757409	0.102041	0.198988	0.102759	0.0133929	0.041791	0.0203583	0.0224215	0.112676	0.0677966	0.0107143	0	0.114035	0.223881	0	1.179	1.37893	1.06598	1.09796	1.11303	1.00528	1.01485	1.01401	1.03782	1.04832	1.02036	1.00934	1	1.03015	1.10898	1
9.07038e-168	1.35066	0.83	0.398	3.05635e-163	Pdpn+ TEC	Rhoc	162.515	2.06994	3.04391	1.69388	4.51265	0.827069	0.545759	0.440512	1.83876	1.04036	2.31925	2.76271	0.792857	0.159696	2.77193	2.95522	1.47826	1.63724	2.12562	1.78252	2.45035	1.55549	1.14423	1.12796	1.70831	1.64339	1.86943	1.79687	1.33831	1.0952	1.58955	2.32908	2.33102
1.58244e-167	1.12537	0.957	0.774	5.33221e-163	Pdpn+ TEC	Tsc22d1	162.273	17.7146	9.53238	3.78827	6.32209	2.67269	4.94643	4.48699	4.39658	0.775785	8.76526	10.6949	4.625	0.946768	8.86842	3.58209	1.95652	3.55742	3.24191	2.57642	2.7893	2.49308	1.9155	2.01289	2.4244	1.52707	3.0079	2.79836	2.43967	1.63127	2.44223	2.26939	2.55137
6.39127e-165	2.38374	0.426	0.073	2.1536e-160	Pdpn+ TEC	Bicc1	159.667	0.310019	0.844127	0.0765306	0.392917	0.099667	0.129464	0.0447761	0.0806189	0.38565	0.0938967	0.0677966	0.0107143	0.0190114	0.622807	5.29851	0.130435	1.15053	1.4598	1.05903	1.2195	1.10934	1.04384	1.02559	1.04327	1.32734	1.06259	1.03172	1.00465	1.01006	1.27602	2.43674	1.23185
4.93832e-164	2.7204	0.374	0.052	1.66402e-159	Pdpn+ TEC	Scarf2	158.779	0.540643	0.525796	0.0357143	0.11973	0.0696955	0.0111607	0.00682303	0.00488599	0	0.0140845	0.0169492	0.0357143	0.0114068	0.0438596	1.13433	0	1.23554	1.28247	1.02623	1.07878	1.06661	1.00266	1.00243	1.00353	1	1.00957	1.0042	1.02597	1.00874	1.00723	1.45941	1
1.622e-163	1.30252	0.842	0.409	5.4655e-159	Pdpn+ TEC	Ddr1	158.262	2.17013	2.5225	1.36224	1.79933	0.938868	0.733259	0.326652	0.350977	0.242152	0.793427	1.27119	0.425	0.0532319	0.570175	0.373134	0	1.763	2.02023	1.80435	1.72827	1.78418	1.20186	1.10179	1.21205	1.23869	1.34159	1.359	1.17229	1.03863	1.1419	1.22691	1
1.62731e-163	1.28657	0.842	0.417	5.48338e-159	Pdpn+ TEC	Serpinh1	158.261	2.28544	3.35675	0.714286	3.81113	1.25024	2.05357	0.966311	0.101792	0.00896861	0.28169	3.0678	0.903571	0.231939	1.15789	18.0299	3	1.74694	2.1934	1.42593	2.32844	1.80677	1.43722	1.25425	1.06545	1.00979	1.12206	1.73296	1.24782	1.1354	1.28374	3.91402	2.93661
1.94677e-163	1.58894	0.724	0.301	6.55985e-159	Pdpn+ TEC	Twsg1	158.183	1.28355	1.74973	0.627551	0.725126	0.44196	0.93192	0.376119	0.386808	0.058296	0.7277	2.13559	0.635714	0.178707	0.491228	0.970149	0.130435	1.45753	1.76045	1.41161	1.34208	1.38317	1.22667	1.18179	1.20628	1.04572	1.35182	1.59066	1.29644	1.1294	1.12569	1.39168	1.12634
2.18152e-163	1.31365	0.9	0.56	7.35086e-159	Pdpn+ TEC	Enah	158.134	3.53497	4.43249	1.80357	1.79258	1.33064	2.4654	1.58849	1.05375	0.264574	1.24413	5.10169	3.2	0.114068	0.684211	0.462687	0.73913	2.14043	2.52445	2.0249	1.7296	2.04854	1.56501	1.46279	1.63111	1.19465	1.56153	2.13006	2.36924	1.11596	1.1913	1.2377	1.86599
1.03162e-162	1.22962	0.888	0.591	3.47615e-158	Pdpn+ TEC	H2-DMb1	157.459	4.10397	4.47311	1.02041	2.70658	1.00119	3.19866	4.85117	2.85423	0.789238	1.19718	1.30508	0.696429	0.855513	0.315789	0.149254	0	2.13481	2.44512	1.56704	1.99791	1.6689	1.65128	2.0263	1.99373	1.53635	1.50036	1.42466	1.30564	1.30659	1.07763	1.06145	1
1.26025e-161	1.86807	0.704	0.295	4.24654e-157	Pdpn+ TEC	Col12a1	156.372	0.856333	3.26674	0.433673	0.261383	0.96432	1.08705	0.808529	0.294788	0.0403587	0.478873	0.0338983	0.0607143	0.0380228	0.0263158	0.313433	0	1.40952	2.24775	1.31051	1.13536	1.79962	1.27973	1.26203	1.16351	1.04045	1.19926	1.03153	1.03046	1.01907	1.00541	1.20567	1
1.47714e-160	1.26009	0.834	0.392	4.97736e-156	Pdpn+ TEC	Plxdc2	155.303	3.58601	3.72887	1.77296	1.55143	1.19244	0.38058	0.387633	1.03094	1.32735	0.380282	0.525424	0.567857	2.48289	1.36842	10	0	2.25198	2.41083	2.03993	1.70329	2.02591	1.11727	1.13208	1.59421	1.95862	1.17884	1.21429	1.25883	2.58771	1.40265	3.24474	1
2.00838e-160	2.41903	0.401	0.065	6.76745e-156	Pdpn+ TEC	Angptl4	155.17	0.168242	0.679473	0.15051	0.269815	0.13392	0.0189732	0.0196162	0.0187296	0	0.00469484	0.0338983	0.0107143	0.0684411	0.447368	1.37313	0.695652	1.07656	1.36399	1.1125	1.16002	1.12321	1.0076	1.00597	1.01238	1	1.0023	1.01213	1.00615	1.03669	1.10946	1.74015	1.94242
9.08926e-160	1.86313	0.531	0.132	3.06272e-155	Pdpn+ TEC	Fhod3	154.514	0.0982987	1.61251	0.859694	0.224283	0.32921	0.0915179	0.282729	0.359935	0.0313901	0.380282	0.0169492	0.739286	0.0152091	0.114035	0	0.0434783	1.06222	1.76218	1.63132	1.14059	1.3922	1.02597	1.11596	1.24629	1.03071	1.18758	1.00326	1.41582	1.01603	1.02699	1	1.06871
1.27137e-159	1.30431	0.807	0.371	4.28401e-155	Pdpn+ TEC	Copz2	154.368	6.53686	2.80461	0.581633	1.48061	1.10847	0.523438	0.393603	0.381922	0.044843	0.0798122	0.881356	0.232143	0.0532319	2.15789	1.77612	0.434783	2.56845	2.05967	1.40823	1.64592	1.75504	1.13856	1.11483	1.19612	1.05567	1.03816	1.27561	1.11567	1.0324	1.50308	1.76344	1.63012
1.72926e-159	1.42084	0.605	0.181	5.82691e-155	Pdpn+ TEC	Adam28	154.235	1.29301	1.49945	2.54337	0.900506	0.473834	0.0770089	0.0439232	0.122964	0.0134529	0.028169	0.0338983	0.0321429	0.0380228	0.0350877	0	0	1.53904	1.7268	2.26367	1.38891	1.47977	1.03337	1.02309	1.10711	1.01613	1.01702	1.01004	1.02213	1.01704	1.00577	1	1
3.61328e-158	2.16815	0.524	0.135	1.21753e-153	Pdpn+ TEC	Sord	152.915	1.25709	1.02854	0.122449	0.748735	0.119886	0.116071	0.211514	0.109935	0.318386	0.0234742	0.152542	0.0214286	0.159696	0.921053	0.298507	0.0434783	1.40283	1.4801	1.10062	1.35312	1.11534	1.03101	1.06167	1.07676	1.26691	1.00942	1.04171	1.00983	1.12394	1.22977	1.16107	1.08049
1.48848e-157	1.23647	0.869	0.47	5.01558e-153	Pdpn+ TEC	Wnt4	152.3	7.64461	3.98134	1.98469	1.17875	1.51142	2.08482	0.86951	0.696254	0.0493274	0.910798	6.52542	0.125	0.0874525	0.464912	0.119403	0	2.75679	2.37687	2.03295	1.54727	2.0361	1.46978	1.26702	1.36976	1.03191	1.40034	2.45859	1.0451	1.06847	1.09754	1.06172	1
6.14263e-157	1.48924	0.694	0.252	2.06982e-152	Pdpn+ TEC	Col18a1	151.684	1.33459	1.74753	0.119898	0.797639	0.62607	0.271205	0.240512	0.188111	0.560538	0.2723	0.661017	0.0642857	0.0114068	0.403509	1.79104	0	1.52969	1.78834	1.10054	1.35775	1.56257	1.09016	1.08034	1.13948	1.61766	1.12008	1.22296	1.01461	1.00763	1.10866	1.79904	1
1.47088e-156	2.07904	0.499	0.116	4.95629e-152	Pdpn+ TEC	Gpx8	151.305	0.47259	0.852909	0.875	0.851602	0.166746	0.0669643	0.00852878	0.012215	0.0044843	0.0234742	0.491525	0.00714286	0.00760456	1.12281	2.38806	0.217391	1.17929	1.42249	1.4831	1.44867	1.11382	1.02564	1.00304	1.00671	1.00896	1.01223	1.15886	1.0091	1.00366	1.27707	1.99017	1.25706
1.89138e-156	1.23379	0.868	0.467	6.3732e-152	Pdpn+ TEC	Clstn1	151.196	2.23819	2.7596	0.97449	1.51265	0.991199	1.17188	0.432836	0.722313	0.116592	1.11737	3.16949	0.435714	0.0380228	0.77193	1.10448	0.173913	1.80711	2.12172	1.6101	1.64455	1.8932	1.32397	1.14898	1.42727	1.10299	1.50739	1.83507	1.28091	1.03575	1.20821	1.56451	1.19525
2.27869e-156	1.75541	0.593	0.18	7.67826e-152	Pdpn+ TEC	Kitl	151.115	2.09452	1.56202	1.17092	0.58516	0.121551	0.665179	0.571429	0.65798	0.0807175	0.0516432	1.37288	0.0321429	0.0190114	0.0438596	1.41791	3.34783	1.70866	1.70039	1.61302	1.28244	1.13224	1.19351	1.19664	1.40803	1.05515	1.03631	1.32907	1.02031	1.01324	1.0078	1.86083	3.14409
2.26014e-155	1.57077	0.735	0.317	7.61578e-151	Pdpn+ TEC	Tnfrsf1a	150.118	1.67486	1.58178	0.505102	1.31029	0.447907	0.553571	0.31855	0.399837	0.219731	0.42723	1.35593	0.332143	0.235741	0.657895	1.85075	1.21739	1.58469	1.74071	1.34071	1.60864	1.35231	1.13766	1.10171	1.21386	1.21029	1.20781	1.41512	1.18537	1.28034	1.17142	1.86398	2.24035
1.82486e-154	1.36485	0.729	0.286	6.14904e-150	Pdpn+ TEC	Bcl11a	149.211	1.34405	1.84852	0.857143	0.816189	0.633206	0.483259	0.191898	0.236156	0.170404	0.661972	1.30508	0.414286	0.262357	0.219298	0.0149254	0	1.52581	1.85687	1.59172	1.39208	1.66049	1.14481	1.07629	1.17239	1.17042	1.29635	1.37026	1.19952	1.12463	1.08124	1.00742	1
1.04021e-153	2.2597	0.507	0.137	3.50509e-149	Pdpn+ TEC	Tmem141	148.455	0.551985	0.913282	0.382653	0.838111	0.123216	0.121652	0.15565	0.0708469	0.170404	0.13615	1.32203	0.164286	0.0342205	1.24561	0.119403	0.0434783	1.21532	1.4395	1.21565	1.38182	1.09772	1.03629	1.04314	1.03697	1.15005	1.05728	1.41663	1.06739	1.01593	1.32061	1.07824	1.06095
2.76068e-153	1.84522	0.6	0.194	9.30239e-149	Pdpn+ TEC	Psat1	148.031	3.33081	1.29418	0.15051	1.40641	0.163178	0.700893	0.306183	0.0789902	0.0313901	0.0140845	0.254237	0.0678571	0.197719	0.649123	0.223881	0	1.9193	1.57248	1.11495	1.59036	1.13051	1.1532	1.09028	1.0457	1.0179	1.00993	1.06956	1.02453	1.11098	1.17863	1.18872	1
4.27569e-153	1.46573	0.75	0.327	1.44074e-148	Pdpn+ TEC	Cbx6	147.841	1.57845	1.91218	1.10204	1.0489	0.537108	0.757812	0.261407	0.120521	0.0269058	0.938967	1.20339	0.510714	0.129278	0.859649	0.940299	0.0434783	1.61639	1.81915	1.70167	1.46708	1.52172	1.19734	1.09228	1.08884	1.0306	1.4433	1.36421	1.21821	1.13556	1.26271	1.38182	1.0959
3.71486e-152	2.21754	0.44	0.088	1.25176e-147	Pdpn+ TEC	Slc7a2	146.902	0.0718336	0.90011	0.257653	0.212479	0.102521	0.0725446	0.194456	0.47557	0.00896861	0.225352	0.0508475	0.00714286	0.00380228	0.833333	0.462687	0	1.0408	1.4687	1.23863	1.11457	1.11649	1.02022	1.07187	1.28574	1.01291	1.08123	1.02017	1.00615	1.00721	1.27066	1.26091	1
2.33051e-151	2.17026	0.544	0.179	7.85288e-147	Pdpn+ TEC	Fam3c	146.105	0.559546	1.2393	0.464286	1.5059	0.143197	0.595982	0.199147	0.0912052	0.0403587	0.107981	0.423729	0.264286	0.330798	0.421053	0.61194	0.391304	1.21456	1.5556	1.27621	1.61197	1.11325	1.14032	1.05912	1.04142	1.03493	1.04342	1.13944	1.12787	1.31766	1.10912	1.31382	1.53375
5.04121e-151	2.10356	0.461	0.1	1.69869e-146	Pdpn+ TEC	Ptpre	145.77	0.523629	0.84303	0.530612	0.450253	0.0754044	0.0714286	0.167164	0.164495	0.0627803	0.107981	0.152542	0.175	0.56654	0.166667	0.134328	0.173913	1.20184	1.41767	1.37793	1.20575	1.08731	1.02214	1.05819	1.11446	1.0688	1.04924	1.04744	1.12275	1.35622	1.06576	1.0886	1.21794
1.1313e-150	1.05153	0.92	0.688	3.81204e-146	Pdpn+ TEC	Sf3b6	145.419	9.0794	5.43139	1.95918	3.44013	1.70909	7.1529	3.78849	2.16368	1.18386	2.21127	5.08475	2.18929	1.90875	3	1.74627	0.434783	2.84031	2.62009	1.9774	2.16747	1.99601	2.12576	1.81941	1.83709	1.69322	1.80496	2.13265	1.74456	2.05144	1.62457	1.75798	1.46545
5.77894e-150	2.2059	0.392	0.068	1.94727e-145	Pdpn+ TEC	Mtmr11	144.711	0.325142	0.582876	0.0535714	0.109612	0.122978	0.0290179	0.0179104	0.017101	0.0044843	0.117371	0.152542	0.0321429	0.0114068	0.0438596	0.149254	0.0869565	1.1372	1.29886	1.05229	1.06524	1.13852	1.00868	1.00683	1.01412	1.00344	1.05214	1.04736	1.02845	1.00348	1.01202	1.06707	1.19897
1.73101e-148	2.05325	0.322	0.042	5.83282e-144	Pdpn+ TEC	Chn2	143.234	0.020794	0.673985	0.0637755	0.0708263	0.00951475	0.0424107	0.107889	0.0456026	0.349776	0.178404	0.0338983	3.35714	0.269962	0.00877193	0.104478	0.130435	1.011	1.38536	1.05541	1.0398	1.01273	1.00954	1.03969	1.03974	1.32461	1.09574	1.00586	2.57479	1.16547	1.00188	1.09063	1.20905
7.31791e-148	1.07742	0.903	0.618	2.46584e-143	Pdpn+ TEC	Nenf	142.608	3.42155	3.98134	2.09184	2.78921	1.46598	4.83259	3.15522	0.903094	0.251121	2.62441	2.86441	1.25	0.304183	4.24561	4.56716	0.73913	2.01459	2.37145	2.04386	2.09758	1.90353	1.86715	1.71187	1.41471	1.19776	1.98874	1.8156	1.48808	1.13748	1.84372	2.53543	1.89185
5.9791e-147	2.28307	0.413	0.078	2.01472e-142	Pdpn+ TEC	Ang	141.696	0.20983	0.720088	0.369898	0.0910624	0.0554234	0.0412946	0.113433	0.292345	0.0179372	2.22066	1.22034	0.0107143	0.00760456	0.22807	0.507463	0	1.08541	1.36723	1.2714	1.05652	1.04894	1.01171	1.03623	1.14428	1.02081	1.8078	1.42954	1.01741	1.00532	1.0609	1.20771	1
6.68292e-145	1.66284	0.514	0.136	2.25188e-140	Pdpn+ TEC	Tspan9	139.647	0.756144	0.92865	0.535714	0.43339	0.213606	0.0625	0.116844	0.0855049	0.0134529	0.126761	0.79661	0.0571429	0.0532319	0.201754	0.701493	0.73913	1.32596	1.4597	1.37475	1.24279	1.24257	1.022	1.04044	1.08065	1.01936	1.06008	1.26437	1.03268	1.04753	1.07267	1.32193	1.69743
1.97578e-143	1.242	0.841	0.594	6.6576e-139	Pdpn+ TEC	Txndc17	138.177	3.34594	3.89023	1.68112	2.64924	1.07184	4.15402	2.74755	1.80619	0.73991	1.6338	3.72881	1.55	0.95057	4.04386	2.40299	1.04348	1.9791	2.30797	1.81432	2.00112	1.65087	1.75321	1.63832	1.67715	1.48177	1.64267	1.92769	1.53799	1.51283	1.83552	1.95628	2.0584
2.40841e-142	2.65991	0.324	0.043	8.11539e-138	Pdpn+ TEC	Slc47a1	137.091	0.36673	0.529089	0.00765306	0.0219224	0.0711227	0.0267857	0.133475	0.00651466	0	0.0140845	0	0.00357143	0.00760456	0.0175439	0	0	1.18122	1.26869	1.00381	1.01053	1.06831	1.008	1.04699	1.0072	1	1.00466	1	1.00129	1.00378	1.0034	1	1
1.27774e-140	1.90193	0.407	0.081	4.30546e-136	Pdpn+ TEC	Tgm2	135.366	0.268431	0.746432	1.17092	0.0758853	0.0654139	0.0446429	0.158209	0.325733	0.183857	0.0657277	0.152542	0.0571429	0.0608365	0	1.19403	1	1.11292	1.37793	1.77544	1.05202	1.0581	1.01293	1.0631	1.19614	1.18895	1.02675	1.04383	1.05002	1.05824	1	1.45918	2.0877
1.32957e-140	2.66224	0.333	0.047	4.48012e-136	Pdpn+ TEC	Smarca1	135.349	0.192817	0.566411	0.0127551	0.256324	0.0578021	0.0212054	0.126652	0.029316	0.0493274	0.375587	0	0.0107143	0.00760456	0.0877193	0.179104	0	1.08523	1.28563	1.01007	1.1266	1.05986	1.00505	1.04255	1.01299	1.03419	1.19569	1	1.00697	1.00833	1.01977	1.06689	1
2.51854e-140	1.47809	0.728	0.376	8.48647e-136	Pdpn+ TEC	Hsd17b10	135.071	1.84499	1.79912	0.727041	1.62901	0.480971	1.5625	0.735608	0.282573	0.35426	0.41784	1.59322	0.725	0.444867	2.99123	0.955224	0.391304	1.57755	1.75393	1.42438	1.67293	1.3299	1.32043	1.19414	1.13205	1.23452	1.21046	1.47925	1.23242	1.3422	1.6305	1.46563	1.47397
2.52277e-140	1.7922	0.623	0.236	8.50072e-136	Pdpn+ TEC	Dhrs3	135.071	1.53875	1.63337	0.65051	0.347386	0.293054	0.522321	0.342431	0.561075	0.125561	0.431925	0.661017	0.296429	0.315589	0.131579	0.402985	1.13043	1.60096	1.69388	1.39453	1.14725	1.26613	1.12567	1.10063	1.29474	1.09837	1.18289	1.24407	1.14131	1.30288	1.03197	1.3043	2.31465
4.35245e-140	1.38339	0.777	0.434	1.4666e-135	Pdpn+ TEC	Lrpap1	134.834	2.27032	2.05928	0.836735	1.64081	0.489772	1.45871	1.27164	0.401466	0.197309	0.995305	2.33898	0.714286	0.406844	2.88596	1.55224	0.478261	1.76722	1.85638	1.48221	1.70611	1.38392	1.31524	1.33218	1.19351	1.14335	1.44728	1.66267	1.27975	1.28584	1.62842	1.68401	1.59563
1.60856e-139	1.35087	0.853	0.485	5.42019e-135	Pdpn+ TEC	Klhl29	134.266	2.5482	5.39297	1.70408	0.91231	1.98763	1.76451	0.954797	0.558632	0.0896861	0.7277	0.966102	0.853571	0.0684411	0.0789474	1.19403	0.0434783	1.9677	2.74893	2.08198	1.42479	2.51753	1.4499	1.38738	1.36338	1.07485	1.38483	1.30169	1.26598	1.04287	1.03246	1.70403	1.05969
2.19654e-139	1.58015	0.678	0.279	7.40146e-135	Pdpn+ TEC	Siva1	134.131	1.98677	1.53677	0.436224	0.802698	0.456946	1.89955	0.283156	0.179153	0.0313901	0.314554	2.15254	0.382143	0.730038	0.517544	0.731343	0.217391	1.65967	1.68655	1.28074	1.39304	1.32566	1.36929	1.08132	1.09936	1.03659	1.15739	1.57557	1.13913	1.37324	1.12885	1.43059	1.3266
7.5153e-139	2.71712	0.342	0.054	2.53236e-134	Pdpn+ TEC	Wnt6	133.596	0.153119	0.744237	0.0331633	0.0286678	0.0789724	0.13058	0.333902	0.0838762	0	0.0187793	0	0.00357143	0.00380228	0.00877193	0.223881	0	1.06307	1.34632	1.02926	1.01495	1.05834	1.03468	1.11399	1.03605	1	1.00666	1	1.00106	1.00183	1.00268	1.26118	1
1.11134e-138	1.16134	0.849	0.468	3.74477e-134	Pdpn+ TEC	Cbr2	133.427	10.8185	4.53568	5.73214	2.38449	1.08325	2.44308	2.26354	3.06596	0.130045	0.150235	19.2203	0.264286	0.212928	4.5614	0.19403	0.0434783	3.06818	2.53878	2.93324	1.93866	1.7738	1.53311	1.54448	2.13825	1.1128	1.0673	3.53447	1.14152	1.12119	1.89678	1.08954	1.05222
2.44271e-138	1.88637	0.558	0.183	8.23094e-134	Pdpn+ TEC	Acaa2	133.085	0.79206	1.04061	0.415816	0.709949	0.190057	0.421875	0.113006	0.111564	0.0179372	0.244131	0.932203	0.389286	0.498099	1.2807	1.02985	0.304348	1.29332	1.48827	1.25395	1.37493	1.15595	1.09659	1.03164	1.06539	1.02497	1.09853	1.30478	1.12385	1.45502	1.29769	1.5845	1.50529
3.31962e-138	1.41067	0.79	0.407	1.11858e-133	Pdpn+ TEC	Immp2l	132.951	3.08696	5.04171	0.943878	1.1113	0.501427	2.02009	2.05288	4.21824	7.46637	8.34272	7.08475	2.81429	0.828897	1.94737	0.865672	0.0869565	2.05593	2.66841	1.64131	1.46572	1.48378	1.48688	1.70964	2.60528	3.44407	3.04277	2.53484	2.18424	1.51367	1.63306	1.34916	1.09318
8.6098e-138	1.96376	0.594	0.253	2.90116e-133	Pdpn+ TEC	Dpysl2	132.537	1.95652	1.80571	0.0586735	1.49747	0.177688	1.60938	0.513859	0.141694	0.215247	1.33803	0.169492	0.907143	0.441065	0.0964912	2.70149	0.956522	1.63536	1.7647	1.04991	1.63488	1.14092	1.33737	1.15365	1.07972	1.20265	1.53828	1.05723	1.48458	1.29429	1.02146	2.15212	2.11664
1.35879e-136	2.69895	0.358	0.061	4.57856e-132	Pdpn+ TEC	Nr1d1	131.339	0.0869565	0.610318	0.109694	0.298482	0.0176023	0.0200893	0.091258	0.240228	0.233184	0.262911	0.169492	0.0464286	0.0190114	0.0438596	0.253731	0.130435	1.0336	1.31631	1.08721	1.16212	1.0208	1.00576	1.03074	1.13376	1.22594	1.17321	1.06205	1.03056	1.04036	1.01373	1.12686	1.10854
1.62168e-136	1.0821	0.885	0.5	5.46442e-132	Pdpn+ TEC	Egfr	131.262	1.80151	4.48408	3.38776	1.47892	2.0264	1.18527	0.415778	0.984528	0.41704	1.60094	1.30508	0.725	0.0798479	0.0175439	2.8209	0	1.71857	2.58523	2.54762	1.71269	2.50824	1.33428	1.16619	1.60615	1.42615	1.70502	1.41976	1.50895	1.04984	1.00561	1.84072	1
1.74827e-136	1.08147	0.662	0.253	5.89098e-132	Pdpn+ TEC	Gna14	131.23	0.909263	1.75631	1.80102	1.2715	0.770457	0.200893	0.171429	0.110749	0.32287	0.0938967	0.762712	0.917857	0.0342205	0.0175439	0.268657	0	1.3678	1.77955	1.89399	1.56668	1.72241	1.06257	1.0509	1.05483	1.25908	1.046	1.22262	1.5233	1.02234	1.0035	1.12377	1
8.49e-136	1.47393	0.782	0.474	2.86079e-131	Pdpn+ TEC	Suco	130.544	2.04915	3.50604	0.897959	2.61214	0.724548	1.15625	1.00171	0.905537	0.44843	0.957746	1.28814	2.23571	0.931559	0.982456	0.432836	0.173913	1.71716	2.24411	1.55891	1.92738	1.67719	1.30543	1.3424	1.51866	1.38393	1.46787	1.4041	2.0968	1.65796	1.31246	1.23814	1.24843
1.46937e-135	1.55275	0.685	0.339	4.95119e-131	Pdpn+ TEC	Vkorc1	130.305	1.02079	1.49506	0.627551	1.3457	0.339676	1.22768	0.573134	0.458469	0.174888	0.765258	0.847458	0.75	0.224335	3.2193	2.31343	0.173913	1.36821	1.6589	1.37872	1.60717	1.2376	1.25748	1.15338	1.20013	1.11107	1.33778	1.28678	1.26532	1.12129	1.68876	1.8954	1.40763
1.60991e-135	1.51532	0.711	0.32	5.42477e-131	Pdpn+ TEC	Enho	130.266	2.20227	2.72009	0.109694	3.15683	0.179591	2.18415	3.93177	0.419381	0.0134529	3.75117	0.338983	0.739286	0.0380228	0.0701754	0.313433	0	1.68303	2.01136	1.07659	2.02657	1.1515	1.44211	1.82319	1.18488	1.02006	2.19707	1.12522	1.21939	1.02075	1.01652	1.24881	1
6.53613e-135	2.001	0.446	0.104	2.20241e-130	Pdpn+ TEC	Gm48742	129.657	0.595463	0.990121	0.188776	1.12142	0.247859	0.0502232	0.0115139	0.002443	0	0.0187793	0.0338983	0.0321429	0.00380228	0.00877193	0.298507	0	1.20591	1.4516	1.15065	1.55343	1.19792	1.01499	1.00473	1.00134	1	1.00578	1.01853	1.01278	1.00215	1.00205	1.16151	1
8.49938e-135	2.28021	0.44	0.107	2.86395e-130	Pdpn+ TEC	P3h4	129.543	0.364839	0.709111	0.122449	0.578415	0.121789	0.126116	0.0703625	0.0456026	0.0044843	0.112676	0.372881	0.025	0.0228137	1.14035	0.537313	0.0434783	1.14306	1.35352	1.0816	1.29542	1.10014	1.03105	1.02143	1.02503	1.00781	1.06645	1.12954	1.01339	1.02093	1.30265	1.2536	1.02566
1.02992e-134	1.36515	0.589	0.196	3.47041e-130	Pdpn+ TEC	Agrn	129.46	0.379962	1.09111	0.734694	0.259696	0.325404	0.142857	0.115991	0.310261	0.766816	0.0985915	0.254237	0.157143	0.0646388	0.0614035	0.149254	0.0869565	1.17283	1.53612	1.48576	1.16325	1.35348	1.04282	1.04333	1.24628	1.76841	1.04888	1.09427	1.10579	1.05843	1.02027	1.07953	1.19912
1.37903e-134	2.00234	0.414	0.088	4.64678e-130	Pdpn+ TEC	Plscr2	129.333	0.175803	0.770582	0.635204	0.198988	0.236679	0.0323661	0.0490405	0.0228013	0	0.0234742	0.0677966	0.0321429	0.0456274	0.00877193	0.492537	2.56522	1.08681	1.39164	1.38978	1.11375	1.17692	1.00951	1.02534	1.00908	1	1.00643	1.02198	1.025	1.04369	1.00146	1.28655	2.74915
1.10771e-133	1.00284	0.906	0.57	3.73255e-129	Pdpn+ TEC	Ybx3	128.428	5.20038	3.98902	2.29847	7.22091	1.38892	5.14174	1.24861	1.50326	0.0986547	0.877934	4.27119	2.05	0.863118	3.91228	3.07463	0.782609	2.29152	2.36868	2.07743	2.88731	1.90524	1.87625	1.32852	1.61375	1.07932	1.3897	2.04054	1.60598	1.41168	1.79297	2.16906	1.72835
1.76331e-133	1.41383	0.547	0.17	5.94163e-129	Pdpn+ TEC	Slfn5	128.226	0.568998	1.17234	0.625	0.359191	0.444339	0.0390625	0.134328	0.0773616	0.192825	0.0187793	0.525424	0.175	0.239544	0.0701754	2.56716	1.95652	1.25078	1.56894	1.42811	1.22761	1.41698	1.01519	1.04294	1.04771	1.18568	1.00878	1.16917	1.12061	1.15316	1.01381	1.93003	2.7235
7.47956e-133	1.1054	0.941	0.728	2.52031e-128	Pdpn+ TEC	Nfkb1	127.599	5.82042	6.08342	2.77806	2.62563	1.57873	3.01116	3.52026	2.8127	1.67265	3.21596	3.37288	1.40714	2.34601	1.0614	1.53731	0.434783	2.56272	2.8572	2.36314	2.02505	2.29154	1.66197	1.95681	2.18293	2.15245	2.17565	1.93946	1.78061	2.37967	1.31274	1.69694	1.5159
1.67278e-132	2.45725	0.42	0.143	5.63659e-128	Pdpn+ TEC	Dbp	127.249	0.603025	1.10867	0.0510204	0.844857	0.0599429	0.340402	0.340299	0.232085	0.403587	0.478873	0.169492	0.135714	0.136882	0.201754	0.0597015	0.0434783	1.23491	1.51924	1.04149	1.36461	1.05557	1.08645	1.10254	1.11266	1.26601	1.23615	1.0723	1.0537	1.1537	1.05433	1.04714	1.05969
1.93202e-132	1.12494	0.868	0.572	6.51013e-128	Pdpn+ TEC	Prdx6	127.186	4.35539	4.07355	1.99745	5.4199	1.32992	4.48103	1.59318	0.983713	0.811659	1.0892	7.30508	2.55	2.29278	2.99123	1.95522	0.391304	2.16074	2.35358	1.95881	2.50752	1.81063	1.78314	1.41772	1.4482	1.52722	1.44193	2.42096	1.72819	2.31202	1.64358	2.00985	1.38087
7.4229e-132	1.25307	0.855	0.556	2.50122e-127	Pdpn+ TEC	Cyrib	126.602	5.61248	3.58946	1.21429	1.58685	0.905566	2.36049	1.32921	0.79316	0.901345	1.69014	2.20339	2.23214	2.09886	1.07018	0.552239	0.173913	2.4566	2.30741	1.75607	1.64088	1.78649	1.51522	1.39098	1.43599	1.62761	1.69417	1.59274	2.02439	2.17537	1.34688	1.2793	1.33326
5.57896e-131	1.6842	0.47	0.121	1.87988e-126	Pdpn+ TEC	Krt19	125.726	0.546314	2.63117	7.06633	1.71669	0.0792103	0.162946	0.820469	1.18567	0.506726	3.66197	0.20339	4.16429	0.0152091	0.0175439	0.0746269	0	1.19393	1.98465	3.0276	1.66743	1.06552	1.04382	1.23765	1.50438	1.36019	2.16995	1.07191	2.19151	1.00633	1.00698	1.01773	1
5.67628e-130	1.74203	0.441	0.107	1.91268e-125	Pdpn+ TEC	Kcnk1	124.718	0.466919	0.881449	0.533163	2.8145	0.0920552	0.164062	0.0635394	0.021987	0.0179372	0.239437	5.76271	0.264286	0.00760456	1.17544	0	0	1.16129	1.42533	1.29939	1.94651	1.08585	1.04622	1.01757	1.01543	1.0042	1.10937	2.19278	1.09901	1.00692	1.3045	1	1
9.16428e-130	1.40232	0.64	0.247	3.088e-125	Pdpn+ TEC	Ly75	124.51	7.1966	1.77497	0.22449	0.522766	0.203616	0.28125	0.498934	0.855049	0.399103	0.375587	0.440678	0.146429	0.342205	0.192982	0.0597015	0.0869565	2.68117	1.76191	1.14742	1.23947	1.23144	1.07609	1.16738	1.45334	1.30707	1.21101	1.15876	1.11827	1.24847	1.03696	1.01545	1.0723
1.76695e-129	1.85999	0.474	0.125	5.95391e-125	Pdpn+ TEC	Cdc42ep5	124.225	0.321361	0.765093	0.852041	0.669477	0.168649	0.0524554	0.0528785	0.236156	0.0269058	0.0422535	0.79661	0.0607143	0.0114068	0.219298	0.850746	0.130435	1.12438	1.40206	1.49335	1.34062	1.14106	1.01654	1.02123	1.12875	1.02225	1.01697	1.23475	1.03104	1.00573	1.05608	1.46441	1.16153
7.13335e-129	1.43459	0.525	0.159	2.40365e-124	Pdpn+ TEC	Mtus1	123.619	0.769376	1.12294	2.1301	0.56661	0.271408	0.0870536	0.0635394	0.148208	0.0269058	0.107981	2.28814	0.0642857	0.00760456	1.40351	0.985075	0.130435	1.32709	1.55273	2.07267	1.28256	1.3144	1.03087	1.02358	1.09502	1.02311	1.07808	1.57648	1.02625	1.0034	1.41676	1.43714	1.17738
1.22492e-128	1.03642	0.817	0.425	4.12749e-124	Pdpn+ TEC	Cd81	123.384	2.46692	3.33589	1.73469	8.84148	0.866794	3.03906	2.09467	0.358306	0.304933	0.934272	4.91525	0.207143	0.749049	4.12281	13.7761	10.3478	1.73911	2.20405	1.80711	3.05642	1.5801	1.61652	1.49999	1.15968	1.23017	1.43753	2.0988	1.09028	1.4993	1.83357	3.84218	4.63045
1.53753e-128	1.4355	0.728	0.345	5.18087e-124	Pdpn+ TEC	Tfdp2	123.286	2.15123	2.10538	0.609694	0.650927	0.670076	1.07254	0.446055	0.273616	0.0807175	0.502347	0.864407	0.535714	0.634981	0.964912	0.253731	0.130435	1.77204	1.90835	1.40333	1.32394	1.6097	1.2592	1.15598	1.15966	1.05805	1.21764	1.26611	1.2502	1.50755	1.30798	1.13083	1.28285
1.61384e-128	2.13702	0.457	0.122	5.43799e-124	Pdpn+ TEC	Fzd3	123.265	0.448015	0.768386	0.326531	0.580101	0.114415	0.179688	0.115991	0.0659609	0.0044843	0.295775	0.576271	0.303571	0.0152091	0.447368	0.134328	0	1.16967	1.39911	1.22407	1.27543	1.12087	1.0445	1.04366	1.04257	1.00068	1.1483	1.19682	1.10624	1.00625	1.1204	1.08062	1
1.92179e-128	1.33932	0.524	0.162	6.47567e-124	Pdpn+ TEC	Tgfbr2	123.189	1.06805	0.97146	1.2449	0.300169	0.253092	0.0747768	0.0204691	0.0895765	0.116592	0.028169	0.322034	0.0321429	0.714829	0.263158	2.8806	0.608696	1.469	1.46936	1.70719	1.16835	1.27264	1.02471	1.00943	1.06957	1.10468	1.01614	1.11083	1.01538	1.57693	1.07669	2.06281	1.63179
2.72074e-128	1.98242	0.51	0.17	9.16781e-124	Pdpn+ TEC	Ctf1	123.038	1.22495	0.948408	0.242347	0.539629	0.207422	0.316964	0.160768	0.0504886	0	0.169014	0.440678	0.225	0.0114068	0.894737	0.0298507	0	1.40588	1.43365	1.19201	1.2423	1.15623	1.0694	1.04736	1.02281	1	1.081	1.14286	1.08145	1.00549	1.23459	1.01054	1
4.03446e-128	1.67429	0.485	0.133	1.35945e-123	Pdpn+ TEC	Eda	122.867	0.561437	1.58288	0.668367	0.155143	0.226213	0.207589	1.25117	0.178339	0.0179372	1.95775	0.169492	0.310714	0.0456274	2.17544	1.49254	0	1.19112	1.73815	1.47215	1.12071	1.24852	1.06266	1.46086	1.10249	1.02032	1.7667	1.05372	1.09743	1.02678	1.71702	1.91664	1
2.49479e-127	1.03247	0.884	0.519	8.40643e-123	Pdpn+ TEC	Isg15	122.075	5.94518	8.81559	11.9694	8.96965	4.52997	1.3471	1.24989	2.73534	1.02242	0.29108	5.45763	1.4	2.11027	1.12281	1.26866	0.956522	2.43383	3.26559	3.85915	3.23286	2.98662	1.41208	1.39875	2.14569	1.58781	1.13659	2.22975	1.59441	2.07093	1.28368	1.80716	2.10825
2.9417e-127	1.37317	0.535	0.167	9.91237e-123	Pdpn+ TEC	Ltbp3	122.004	0.574669	0.829857	0.441327	0.612142	0.281161	0.100446	0.0869936	0.0285016	0.0044843	0.131455	0.491525	0.05	0.0228137	0.754386	0.671642	0	1.27428	1.43871	1.33605	1.33283	1.32045	1.03336	1.03345	1.02276	1.00333	1.0652	1.1551	1.0199	1.0126	1.21513	1.37302	1
4.09008e-127	1.10736	0.822	0.439	1.37819e-122	Pdpn+ TEC	Gm20186	121.861	6.04537	3.7618	2.39286	2.80944	0.926023	0.75558	0.733902	2.24756	0.636771	1.12207	8.59322	0.821429	0.581749	3.47368	0.671642	0.130435	2.48774	2.2645	2.10751	1.94509	1.79182	1.19054	1.25436	2.01138	1.55577	1.49707	2.57734	1.50228	1.36638	1.65462	1.2924	1.18131
7.76309e-127	1.12148	0.846	0.541	2.61585e-122	Pdpn+ TEC	Rdx	121.582	2.78261	2.96487	1.2602	2.07251	0.985966	3.57254	1.36205	0.531759	0.26009	1.0939	3.16949	1.48214	1	2.20175	2.41791	2	1.86212	2.11987	1.71257	1.81964	1.75461	1.67758	1.37289	1.28175	1.2328	1.45781	1.80761	1.62591	1.70741	1.52618	2.06496	2.49429
3.49825e-126	2.46956	0.317	0.049	1.17877e-121	Pdpn+ TEC	Col23a1	120.929	0.0189036	0.567508	0.122449	0.185497	0.036156	0.0379464	0.256716	0.0553746	0.00896861	0.0140845	0	0.0857143	0.0228137	2.31579	0.0597015	0	1.00722	1.30181	1.11379	1.09034	1.04669	1.01097	1.09199	1.02507	1.00203	1.00765	1	1.05889	1.01489	1.6839	1.0343	1
4.00459e-126	1.32565	0.515	0.161	1.34939e-121	Pdpn+ TEC	Casp12	120.87	0.459357	0.829857	0.55102	0.485666	0.362036	0.0546875	0.0200426	0.0920195	0.00896861	0.0328638	0.271186	0.0464286	0.0190114	0.0350877	0.701493	0.0434783	1.19594	1.44047	1.39084	1.28237	1.35407	1.01689	1.00716	1.06894	1.01019	1.01454	1.09148	1.0441	1.0164	1.02866	1.51556	1.05202
7.85203e-126	1.98061	0.377	0.076	2.64582e-121	Pdpn+ TEC	Cd302	120.577	0.10397	0.541164	0.0816327	0.453626	0.120124	0.0636161	0.0405117	0.0301303	0.0134529	0.00938967	0.152542	0	0.0684411	0.0350877	4.83582	0	1.05044	1.29013	1.06143	1.25716	1.10615	1.01733	1.01264	1.01519	1.01183	1.00335	1.04267	1	1.02889	1.00852	2.47318	1
3.25115e-125	1.01502	0.879	0.549	1.09551e-120	Pdpn+ TEC	Plpp3	119.96	3.31002	4.58507	0.84949	1.65767	1.7481	1.78125	1.36802	1.53664	2.47982	1.20188	3.28814	0.292857	0.13308	0.342105	6.34328	11.3913	2.08225	2.49527	1.5648	1.77185	2.30378	1.42493	1.43869	1.78277	2.2267	1.47769	1.78357	1.24155	1.10551	1.10315	2.77787	4.43264
3.27565e-125	1.71075	0.558	0.189	1.10376e-120	Pdpn+ TEC	Pygb	119.957	0.962193	1.05049	0.528061	0.505902	0.228354	0.44308	0.172281	0.0912052	0.0358744	0.342723	0.644068	0.153571	0.231939	0.22807	0.149254	0.0869565	1.37608	1.52575	1.32963	1.26103	1.25732	1.12134	1.05947	1.06014	1.02263	1.18103	1.18475	1.09462	1.19746	1.08708	1.08663	1.09318
4.61885e-125	2.01032	0.409	0.092	1.55637e-120	Pdpn+ TEC	F2r	119.808	0.385633	0.657519	0.168367	0.29511	0.136775	0.140625	0.0933902	0.0390879	0.0044843	0.0187793	0.237288	0.025	0.0456274	0.0263158	0.253731	0.0869565	1.15538	1.32032	1.13104	1.16149	1.14164	1.03728	1.02761	1.02361	1.00256	1.00921	1.05309	1.00591	1.02374	1.00539	1.09231	1.09802
5.57769e-125	1.37954	0.687	0.301	1.87946e-120	Pdpn+ TEC	Prxl2c	119.726	1.67297	1.40285	0.795918	0.848229	0.441246	0.63058	0.319829	0.209283	0.139013	0.507042	1.79661	0.489286	0.163498	0.578947	0.850746	0.217391	1.59779	1.63852	1.47079	1.38809	1.37602	1.16132	1.09962	1.12148	1.12551	1.26522	1.50022	1.23117	1.16072	1.15536	1.42826	1.27286
6.81923e-125	2.299	0.362	0.069	2.29781e-120	Pdpn+ TEC	Spry1	119.639	0.347826	0.627881	0.397959	0.41484	0.056137	0.0524554	0.0379531	0.0374593	0.0044843	0.0375587	0.457627	0.0642857	0.1673	0.526316	1.8806	0.478261	1.13422	1.30524	1.23911	1.19252	1.05603	1.0157	1.01202	1.0223	1.00416	1.02069	1.14017	1.03876	1.1883	1.19457	1.77656	1.42025
1.01288e-124	1.66987	0.479	0.132	3.413e-120	Pdpn+ TEC	Dock8	119.467	0.8431	0.851811	1.23724	0.740304	0.0613701	0.09375	0.254158	0.153909	0.125561	0.169014	0.0338983	0.1	1.06084	0.105263	0.0746269	0.0869565	1.37127	1.46143	1.72447	1.38893	1.07937	1.02923	1.09643	1.09961	1.10986	1.08445	1.00853	1.09669	1.8053	1.04288	1.05008	1.13155
1.55329e-124	1.50193	0.679	0.323	5.23397e-120	Pdpn+ TEC	Zbtb38	119.281	1.47826	1.58068	0.576531	1.09275	0.316127	0.510045	0.510021	0.513029	0.224215	0.920188	1.50847	0.628571	0.330798	0.710526	0.985075	0.130435	1.53822	1.72266	1.40051	1.46806	1.321	1.12258	1.17272	1.30942	1.19478	1.40026	1.42424	1.38192	1.29599	1.18554	1.56521	1.09671
1.67611e-123	1.4809	0.56	0.187	5.64781e-119	Pdpn+ TEC	Gpc4	118.248	0.601134	1.21844	0.617347	0.46543	0.38059	0.247768	0.193603	0.411238	0.237668	0.328638	1.81356	0.0892857	0.0304183	0.0175439	1.43284	0.0869565	1.24059	1.60516	1.4493	1.23072	1.38508	1.07356	1.06537	1.25181	1.13908	1.1375	1.566	1.05122	1.01997	1.00477	1.49342	1.23187
2.18885e-123	1.06242	0.867	0.523	7.37556e-119	Pdpn+ TEC	Arhgdib	118.132	6.32136	4.49177	1.15816	1.54637	1.28663	9.39621	5.29211	0.790717	0.35426	0.103286	0.237288	0.325	4.20913	0.535088	0.925373	0.0434783	2.47725	2.43376	1.67773	1.65618	1.75911	2.33604	1.99609	1.35663	1.34959	1.06645	1.08011	1.09762	2.8901	1.09323	1.45609	1.08049
3.77238e-123	2.23862	0.374	0.076	1.27114e-118	Pdpn+ TEC	Cav2	117.896	0.1569	0.558727	0.298469	0.301855	0.0578021	0.108259	0.0618337	0.0952769	0.313901	0.103286	2.20339	0.0142857	0.0304183	0.00877193	0.343284	2.95652	1.0557	1.29013	1.19294	1.13692	1.0462	1.02448	1.02241	1.0504	1.21405	1.05494	1.5933	1.0072	1.01257	1.00198	1.25581	3.17681
1.78506e-122	1.31343	0.772	0.398	6.01493e-118	Pdpn+ TEC	Bcl2	117.221	1.90359	2.91767	1.31633	1.58347	1.00928	1.0625	0.571002	0.346091	0.430493	0.413146	1.37288	1	1.30798	0.640351	1.23881	0.173913	1.74363	2.18946	1.83599	1.75729	1.88197	1.27366	1.2049	1.21599	1.39685	1.21474	1.41451	1.51272	1.87664	1.2937	1.62751	1.26223
3.17836e-122	1.64904	0.566	0.195	1.07098e-117	Pdpn+ TEC	Rflnb	116.97	0.931947	1.80022	0.395408	0.957841	0.66746	0.171875	0.110874	0.0594463	0.0134529	0.056338	0.0677966	0.0392857	0.0190114	0.22807	0.507463	3.3913	1.36906	1.76503	1.28668	1.44809	1.52668	1.05691	1.03428	1.04404	1.0245	1.01912	1.026	1.02592	1.01051	1.07093	1.23183	3.14706
3.84747e-122	2.91966	0.273	0.034	1.29644e-117	Pdpn+ TEC	Ltb4r2	116.887	0.293006	0.375412	0.0255102	0.126476	0.0421028	0.0379464	0.00383795	0.0130293	0	0.00469484	0.0169492	0	0	0	0.0298507	0	1.11575	1.19025	1.02019	1.06532	1.0391	1.01051	1.00154	1.01225	1	1.00279	1.00713	1	1	1	1.00712	1
5.19873e-122	2.07591	0.414	0.097	1.75176e-117	Pdpn+ TEC	Col4a5	116.757	0.243856	0.78595	0.640306	0.392917	0.0837298	0.0714286	0.0827292	0.28013	0.461883	0.028169	0.322034	0.0607143	0.00760456	1.28947	0.537313	0	1.13629	1.44307	1.42496	1.21629	1.10619	1.02066	1.02902	1.18196	1.39287	1.01077	1.11231	1.04176	1.00499	1.5028	1.26169	1
8.90373e-122	2.42132	0.38	0.084	3.0002e-117	Pdpn+ TEC	Efemp2	116.523	0.287335	0.579583	0.109694	0.41484	0.107992	0.0714286	0.0464819	0.00895765	0.0044843	0.0328638	0.101695	0.0285714	0.0114068	1.01754	1.10448	0.0434783	1.11578	1.30829	1.06127	1.20962	1.08288	1.01893	1.01631	1.00698	1.00815	1.01619	1.0306	1.00897	1.0133	1.26018	1.51583	1.0959
5.48637e-121	1.7822	0.605	0.328	1.84869e-116	Pdpn+ TEC	Mrpl3	115.733	2.09074	1.8079	0.331633	1.30523	0.242626	1.62835	0.71258	0.280945	0.143498	0.516432	0.610169	0.45	0.338403	0.666667	0.432836	0.26087	1.67448	1.75465	1.21978	1.56981	1.22143	1.34359	1.20631	1.13875	1.18226	1.22591	1.18171	1.18934	1.25171	1.16361	1.22934	1.35298
8.70418e-121	1.00247	0.877	0.6	2.93296e-116	Pdpn+ TEC	Pebp1	115.533	6.60302	4.16465	1.8801	5.48229	1.14415	6.95536	2.78209	0.783388	0.318386	2.61502	7.25424	3.95714	1.90494	9.2807	3.47761	0.782609	2.48013	2.35314	1.89331	2.58284	1.69519	2.10371	1.62947	1.3429	1.2047	1.95807	2.39691	1.93687	1.99797	2.44421	2.30983	1.76852
1.28194e-120	1.50155	0.788	0.54	4.31962e-116	Pdpn+ TEC	Ly6a	115.365	3.12098	19.7717	33.8495	17.5649	7.63963	4.22545	2.28657	6.85586	5.87892	0.56338	8.76271	0.253571	1.9962	0.438596	18.6418	16.4783	2.03807	4.3143	5.00003	4.09293	3.44005	1.86254	1.57202	2.76734	2.85058	1.22844	2.84312	1.18119	1.5957	1.10412	3.82968	5.25555
3.23421e-120	1.34265	0.501	0.156	1.0898e-115	Pdpn+ TEC	Slc27a3	114.963	0.733459	0.849616	0.262755	0.404722	0.427212	0.0904018	0.0579957	0.0154723	0.0269058	0.0328638	0.101695	0.0714286	0.0722433	0.175439	0.119403	0.0434783	1.27007	1.43358	1.21297	1.20612	1.37144	1.02415	1.0185	1.01482	1.03186	1.01814	1.02196	1.02608	1.02622	1.04285	1.07629	1.08296
7.39635e-120	1.84821	0.52	0.177	2.49227e-115	Pdpn+ TEC	Nqo1	114.603	3.06049	1.35126	0.19898	0.362563	0.108706	0.158482	0.943284	0.312704	0.0358744	0.0328638	0.0508475	0.05	0.0228137	0.201754	0.0298507	0	1.87142	1.5789	1.15491	1.15925	1.10718	1.03834	1.2703	1.17521	1.02305	1.01663	1.01171	1.04864	1.0288	1.03833	1.02883	1
1.7828e-119	1.12814	0.764	0.38	6.00732e-115	Pdpn+ TEC	Gm56555	114.221	4.81853	2.4764	0.405612	1.43339	0.879638	0.530134	0.763753	0.821661	0.538117	0.314554	0.694915	0.642857	0.129278	0.535088	0.641791	0	2.28966	1.98629	1.29784	1.56712	1.73362	1.13585	1.25288	1.47068	1.37373	1.15021	1.20724	1.22549	1.10942	1.16224	1.28465	1
3.87806e-119	1.75602	0.371	0.079	1.30675e-114	Pdpn+ TEC	Igfbp3	113.884	0.26276	1.15368	0.257653	0.0893761	0.4598	0.0982143	0.314712	0.0480456	0.0403587	0	0.0508475	0.132143	0.0532319	0	0.865672	2.78261	1.12596	1.54399	1.19485	1.06449	1.32676	1.01998	1.12267	1.02771	1.01876	1	1.01258	1.03087	1.02846	1	1.34076	3.06793
3.96737e-119	3.00556	0.273	0.036	1.33685e-114	Pdpn+ TEC	Klf15	113.874	0.63327	0.35236	0.0280612	0.118044	0.0185538	0.00669643	0.0140725	0.000814332	0	0.0328638	0.0169492	0.00357143	0.00380228	0.210526	0.0895522	0	1.25245	1.18312	1.01915	1.06029	1.01432	1.00172	1.00413	1.00092	1	1.01718	1.0062	1.00155	1.0021	1.04947	1.06711	1
5.26977e-119	1.96356	0.36	0.074	1.7757e-114	Pdpn+ TEC	Ehd2	113.751	0.102079	0.499451	0.221939	0.234401	0.117507	0.0602679	0.0336887	0.0333876	0.0044843	0.0234742	0.20339	0.025	0.0152091	0.00877193	1.31343	1.21739	1.04573	1.27071	1.1781	1.14829	1.11591	1.01549	1.01167	1.01791	1.00447	1.00913	1.06669	1.01753	1.00454	1.00205	1.60996	2.28157
5.81701e-119	1.04175	0.866	0.56	1.9601e-114	Pdpn+ TEC	Tpd52	113.708	3.87713	3.03074	1.97449	3.37605	0.918411	1.63058	1.09339	1.11971	1.08072	3.87324	6.16949	1.7	0.581749	2.84211	0.238806	0.217391	2.08132	2.13306	1.94624	2.12535	1.72251	1.34771	1.30708	1.57719	1.65116	2.26832	2.28153	1.6789	1.3857	1.63382	1.13581	1.28711
1.23911e-118	2.00072	0.412	0.1	4.1753e-114	Pdpn+ TEC	Nbl1	113.379	0.391304	0.793633	0.359694	0.178752	0.155566	0.0535714	0.150107	0.0781759	0.044843	0.0140845	1.88136	0.0642857	0.0152091	0.0263158	8.85075	0.130435	1.1608	1.38768	1.24807	1.10025	1.11372	1.01209	1.04362	1.0328	1.01799	1.01182	1.48807	1.0159	1.00875	1.00482	3.07496	1.10131
2.2259e-118	1.54436	0.7	0.35	7.50039e-114	Pdpn+ TEC	Gria3	113.125	1.05482	2.9056	0.181122	0.441821	0.219077	2.46094	4.2661	0.95114	0.443946	0.394366	1.15254	0.221429	0.425856	0.763158	1.20896	0	1.43769	2.18905	1.10586	1.22063	1.20931	1.56645	2.14167	1.503	1.37118	1.22828	1.42324	1.16155	1.29984	1.28293	1.57507	1
3.0422e-118	1.62972	0.555	0.195	1.0251e-113	Pdpn+ TEC	Prkci	112.989	0.604915	0.973655	0.811224	0.397976	0.235966	0.300223	0.21194	0.193811	0.058296	0.2723	0.423729	0.25	0.0494297	0.254386	0.208955	0	1.27415	1.50743	1.53207	1.21408	1.25105	1.08624	1.07312	1.12517	1.05949	1.1353	1.12831	1.14482	1.05504	1.07424	1.17845	1
3.35066e-118	3.0103	0.326	0.068	1.12904e-113	Pdpn+ TEC	Epha3	112.947	0.120983	1.01647	0.0331633	0.129848	0.0354424	0.408482	0.372281	0.0863192	0.0313901	0.41784	0.0508475	0.0321429	0.0190114	0	2.47761	0	1.08423	1.52321	1.03914	1.06889	1.03298	1.09797	1.13509	1.06403	1.03303	1.23218	1.01337	1.00947	1.00914	1	1.87972	1
3.29995e-117	1.09342	0.809	0.448	1.11195e-112	Pdpn+ TEC	Anp32a	111.954	3.04915	2.47859	1.39541	2.78415	0.824453	3.51228	0.510874	0.233713	0.412556	1.66197	3.62712	1.96429	2.01521	5.07018	1.70149	2.34783	1.92005	1.97099	1.7741	2.02463	1.57008	1.64056	1.13616	1.13354	1.31736	1.63569	1.86635	1.66566	2.06732	1.96433	1.81069	2.84713
3.7367e-117	1.28047	0.73	0.435	1.25912e-112	Pdpn+ TEC	Hadhb	111.9	2.64461	1.80022	0.571429	1.3457	0.339676	1.44978	1.36546	0.758143	0.26009	1.20657	2.98305	0.878571	0.463878	1.86842	1.02985	0.565217	1.79084	1.78109	1.34176	1.5541	1.29504	1.30723	1.358	1.37523	1.25107	1.49753	1.76887	1.36822	1.3884	1.45737	1.56497	1.63502
5.68481e-117	1.53045	0.527	0.172	1.91555e-112	Pdpn+ TEC	Serpinb5	111.718	0.727788	1.07903	0.67602	0.494098	0.384872	0.178571	0.299787	0.32329	0.0358744	0.0140845	0.288136	0.0357143	0.0494297	0.0350877	0.0298507	0	1.26375	1.53238	1.4655	1.2477	1.3207	1.04789	1.0919	1.16246	1.0421	1.0065	1.09808	1.01681	1.04044	1.00583	1.01481	1
1.48702e-116	1.01045	0.831	0.465	5.01066e-112	Pdpn+ TEC	Sptbn1	111.3	2.31191	2.58068	1.42092	1.66779	0.925309	0.936384	0.462687	0.767915	0.605381	2.28638	3.42373	1.57857	0.498099	1.12281	6.97015	5.69565	1.81512	2.05582	1.79457	1.76149	1.81385	1.24091	1.15566	1.4324	1.52017	1.84351	1.84086	1.76013	1.44555	1.3021	3.04258	3.81189
1.75583e-116	2.50405	0.276	0.038	5.91643e-112	Pdpn+ TEC	Rgs7	111.228	0.0661626	0.724479	0.00765306	0.0725126	0.0140343	0.0457589	0.133902	0.320847	0.0358744	2.41784	0	0.564286	0.0342205	0	0.0149254	0	1.04535	1.41812	1.00653	1.04931	1.01601	1.01632	1.06898	1.21574	1.01386	1.93526	1	1.31805	1.01383	1	1.01189	1
1.66114e-115	1.80593	0.501	0.162	5.59738e-111	Pdpn+ TEC	Ntf5	110.252	0.610586	0.906696	0.303571	0.217538	0.291627	0.183036	0.150107	0.115635	0.044843	0.131455	0.271186	0.125	0.00380228	0.350877	0.0447761	0	1.24674	1.42736	1.23033	1.11237	1.22775	1.04722	1.04068	1.06269	1.04281	1.06551	1.10152	1.05369	1.00427	1.11325	1.03682	1
2.89165e-115	1.50866	0.631	0.313	9.7437e-111	Pdpn+ TEC	Asah1	110.011	1.33081	1.25906	0.553571	1.15177	0.205281	0.879464	0.824733	0.284202	0.29148	0.704225	1.32203	0.657143	0.315589	1.02632	1.52239	0.26087	1.45956	1.57232	1.27804	1.49641	1.16759	1.20236	1.22076	1.13011	1.22164	1.29627	1.39182	1.32732	1.15676	1.26164	1.69224	1.35029
3.41361e-115	1.14704	0.701	0.314	1.15025e-110	Pdpn+ TEC	Rtp4	109.939	1.43856	2.10538	2.40051	2.32546	1.06708	0.315848	0.126226	0.237785	0.116592	0.276995	3.67797	0.567857	0.269962	1.47368	0.80597	0.304348	1.52729	1.93464	2.10949	1.96389	1.76582	1.08966	1.04539	1.15093	1.13316	1.13396	1.94816	1.22217	1.16291	1.3827	1.44133	1.48572
5.07787e-115	1.34349	0.526	0.176	1.71104e-110	Pdpn+ TEC	Mgat3	109.767	1.15312	1.03293	0.732143	0.301855	0.39058	0.0658482	0.0289979	0.128664	0.0852018	0.591549	0.610169	0.107143	0.0190114	0.0175439	0.0746269	0	1.48782	1.5027	1.44604	1.16796	1.38129	1.02283	1.01239	1.07843	1.063	1.24718	1.21349	1.06749	1.01116	1.00348	1.0342	1
1.6422e-114	1.72527	0.536	0.195	5.53357e-110	Pdpn+ TEC	Rab34	109.257	0.775047	0.936334	0.19898	0.627319	0.266651	0.429688	0.256716	0.0561889	0.0044843	0.169014	0.135593	0.0535714	0.0152091	0.780702	0.970149	0.0434783	1.32145	1.45597	1.15805	1.3424	1.21255	1.10169	1.07209	1.03556	1.01096	1.08866	1.05085	1.01534	1.01247	1.19152	1.47624	1.08843
1.05059e-111	1.68359	0.521	0.185	3.54007e-107	Pdpn+ TEC	Pvt1	106.451	0.355388	1.1921	0.102041	0.263069	0.0834919	1.52009	0.558209	0.607492	0.139013	0.70892	0.237288	2.09286	0.285171	0.0175439	0.895522	0.0434783	1.1611	1.59049	1.06755	1.11823	1.08946	1.36715	1.19728	1.36408	1.11369	1.33027	1.07627	2.08614	1.18157	1.00455	1.31776	1.08258
2.21118e-111	2.72641	0.274	0.04	7.4508e-107	Pdpn+ TEC	Zfp185	106.128	0.119093	0.378705	0.209184	0.175379	0.0347288	0.0279018	0.0430704	0.026873	0	0.00469484	0.0508475	0.00714286	0.00380228	0.333333	0.0149254	0.0434783	1.0462	1.20725	1.15383	1.09104	1.03639	1.00753	1.01785	1.01605	1	1.00245	1.0175	1.00289	1.00183	1.1044	1.01345	1.06871
2.37862e-111	1.25291	0.685	0.323	8.01501e-107	Pdpn+ TEC	Rcn1	106.096	1.78828	1.79363	0.239796	4.23272	0.464795	1.46652	0.418337	0.242671	1.55157	0.183099	2.50847	0.246429	0.0988593	1.60526	1.71642	0.26087	1.54906	1.73755	1.18065	2.28774	1.34585	1.32188	1.12351	1.1466	1.8798	1.10687	1.63755	1.07324	1.05518	1.38042	1.72897	1.37575
3.10886e-111	1.33423	0.721	0.371	1.04756e-106	Pdpn+ TEC	Cnn2	105.98	1.68809	2.54995	0.653061	1.29342	1.03711	1.13504	0.483156	0.311889	0.134529	0.0516432	0.711864	0.260714	1.13688	0.114035	1.26866	0.391304	1.60545	1.97531	1.41032	1.64108	1.73043	1.27942	1.13609	1.18109	1.12105	1.02643	1.22073	1.20199	1.67552	1.02331	1.69704	1.51573
3.86222e-111	1.69975	0.377	0.089	1.30141e-106	Pdpn+ TEC	Ajuba	105.886	0.336484	0.535675	0.252551	0.0860034	0.177212	0.0714286	0.0162047	0.0382736	0.00896861	0.0187793	0.101695	0.1	0.0114068	0.0438596	0.164179	0.0434783	1.14009	1.26913	1.16232	1.06083	1.16935	1.02412	1.00664	1.03308	1.00769	1.0082	1.03724	1.02669	1.003	1.00978	1.15098	1.05394
1.12898e-110	1.39132	0.477	0.148	3.8042e-106	Pdpn+ TEC	Tgfb1i1	105.42	0.442344	0.97146	0.0892857	0.315346	0.418887	0.104911	0.0490405	0.0260586	0	0.0234742	0.0338983	0.0392857	0.0190114	10.5877	1.23881	0.521739	1.19892	1.46391	1.06637	1.20158	1.34406	1.03298	1.0181	1.01685	1	1.00941	1.00586	1.02301	1.01551	2.53325	1.60954	1.59052
1.34699e-110	1.00725	0.477	0.16	4.53881e-106	Pdpn+ TEC	Lrp1	105.343	0.340265	0.753019	0.295918	0.445194	0.298525	0.0368304	0.175267	0.199511	0.0762332	0.0657277	0.271186	0	0.0760456	0.122807	3.61194	0	1.15861	1.40559	1.25962	1.28827	1.35775	1.0128	1.06508	1.17593	1.0896	1.02733	1.05587	1	1.04777	1.046	2.19808	1
2.35764e-110	1.02878	0.481	0.161	7.94429e-106	Pdpn+ TEC	Scx	105.1	1.86957	1.32492	0.237245	0.246206	0.93863	0.0602679	0.0324094	0.0138436	0.0134529	0.0328638	0.559322	0.025	0.00760456	0.377193	0.0447761	0	1.73505	1.60733	1.19014	1.1168	1.65517	1.01731	1.0131	1.00859	1.00811	1.01338	1.17896	1.01143	1.00268	1.08808	1.02216	1
6.93419e-110	2.11618	0.281	0.044	2.33654e-105	Pdpn+ TEC	Prkcq	104.631	0.344045	0.477497	0.0255102	0.219224	0.00880114	0.0189732	0.0486141	0.00488599	0.0224215	0.028169	0	0.0107143	0.897338	2.7807	0.164179	0	1.1327	1.24772	1.02298	1.09574	1.00855	1.00774	1.02413	1.00311	1.01561	1.02404	1	1.00363	1.89098	1.80292	1.17256	1
3.75427e-109	2.65457	0.295	0.05	1.26504e-104	Pdpn+ TEC	Abat	103.898	0.977316	0.481888	0.0102041	0.111298	0.010942	0.0234375	0.108316	0.0350163	0.0313901	0.0751174	0.0677966	0.0285714	0.0152091	0.412281	0.298507	0	1.35284	1.24858	1.00765	1.05407	1.01448	1.00975	1.03807	1.02623	1.02134	1.04319	1.01293	1.02589	1.02464	1.11984	1.14297	1
3.81815e-109	1.51315	0.501	0.163	1.28656e-104	Pdpn+ TEC	Bnc2	103.891	1.10208	1.39627	0.637755	0.274874	0.490247	0.31808	0.13177	0.0415309	0.0044843	0.028169	0.152542	0.178571	0.00380228	0.0263158	1.0597	0	1.49596	1.7141	1.44553	1.16113	1.52899	1.11096	1.06595	1.05964	1.00269	1.02987	1.05253	1.05121	1.00195	1.01109	1.4357	1
1.27829e-108	1.20653	0.66	0.289	4.30734e-104	Pdpn+ TEC	Ikzf2	103.366	1.03403	1.7607	2.1199	0.784148	0.492864	0.466518	0.28742	0.45684	0.26009	0.483568	1.89831	0.378571	2.69202	0.973684	0.134328	0	1.45493	1.85063	2.14522	1.41258	1.51847	1.13408	1.11006	1.31129	1.12347	1.2315	1.50925	1.17773	2.66251	1.38292	1.06473	1
2.08423e-108	1.51463	0.48	0.15	7.02302e-104	Pdpn+ TEC	Gucy1a2	103.153	2.05104	1.31614	0.0357143	0.209106	0.415557	0.322545	0.192751	0.0447883	0.0044843	0.28169	0.169492	0.121429	0.0114068	0.649123	0.925373	0	1.85537	1.61352	1.03447	1.10945	1.40128	1.09061	1.07297	1.0288	1.00555	1.16446	1.05603	1.05278	1.00645	1.16723	1.53614	1
7.55381e-108	1.11204	0.777	0.424	2.54533e-103	Pdpn+ TEC	Kif21a	102.594	1.84499	2.36553	0.489796	0.696459	0.33706	4.7846	4.24136	0.711726	0.215247	0.802817	1.35593	0.403571	0.0152091	1.01754	0.104478	0	1.65795	1.98602	1.35761	1.31759	1.33835	1.85773	1.96733	1.35829	1.17719	1.36765	1.45716	1.27288	1.00886	1.27809	1.07953	1
1.88142e-107	1.70318	0.431	0.121	6.33963e-103	Pdpn+ TEC	Jdp2	102.198	0.415879	0.716795	0.372449	0.477234	0.0827783	0.0848214	0.232836	0.271173	0.170404	0.568075	0.186441	0.0392857	0.201521	0.00877193	0.567164	0.391304	1.192	1.34734	1.24752	1.23098	1.09171	1.02555	1.07776	1.1645	1.12521	1.30461	1.05893	1.02669	1.16029	1.00275	1.30104	1.54175
[truncated: 1,001 more rows]

## Sheet: TAC TEC_Proliferating TEC
p_val	avg_log2FC	pct.1	pct.2	p_val_adj	cluster	gene	p_val_adj_score	avg_RNA_counts_idcTEC	avg_RNA_counts_idPdpn+ TEC	avg_RNA_counts_idMimetic globet	avg_RNA_counts_idUnknown	avg_RNA_counts_idmTEC-I	avg_RNA_counts_idTransit-amplifying/Proliferating	avg_RNA_counts_idmTEC-II	avg_RNA_counts_idmTEC-II (Post-Aire)	avg_RNA_counts_idMicrofoldTEC	avg_RNA_counts_idEndoTEC	avg_RNA_counts_idIonocytes mTEC	avg_RNA_counts_idTuft cells	avg_RNA_counts_idT-cells	avg_RNA_counts_idParathyroid cells	avg_RNA_counts_idMesenchymal cells	avg_RNA_counts_idEndothelial cells	avg_RNA_data_idcTEC	avg_RNA_data_idPdpn+ TEC	avg_RNA_data_idMimetic globet	avg_RNA_data_idUnknown	avg_RNA_data_idmTEC-I	avg_RNA_data_idTransit-amplifying/Proliferating	avg_RNA_data_idmTEC-II	avg_RNA_data_idmTEC-II (Post-Aire)	avg_RNA_data_idMicrofoldTEC	avg_RNA_data_idEndoTEC	avg_RNA_data_idIonocytes mTEC	avg_RNA_data_idTuft cells	avg_RNA_data_idT-cells	avg_RNA_data_idParathyroid cells	avg_RNA_data_idMesenchymal cells	avg_RNA_data_idEndothelial cells
[truncated: 1,898 more rows]

[truncated: 9 more sheets: mTEC I_Intertypical, mTEC II_Aire+, mTEC-III_Post-Aire, Tuft like mTEC, Goblet like mTECs, Microfold like mTEC, Ionocyte like mTEC, Neuroendocrine mTEC, aaTECs]
