# Supplementary material for: The cooperation between RNA binding proteins ZFP36L1 and ZFP36L2 controls thymic epithelial cell differentiation to promote thymus function.
Source: Research Square preprint supplement (doi:10.21203/rs.3.rs-6941685/v1), 2025-06-25
Supplement: Supplementary file 5 [file 64a6fe8f03283982f1086dde.xlsx]

## Sheet: README
Column	Description
Term	Functional annotation in database
In.List	Number of genes in list of interest with this functional annotation
In.Annotation	Total number of genes with this functional annotation
P.value	P-value (uncorrected)
Adjusted.P.value	P-value (adjusted for multiple testing), use this one
Odds.Ratio	How to interpret whether or not the gene list is just random (<1 less than by chance, =1 equals chance, >1 more than by chance)
Combined.Score	Combined enrichr score
Genes	Enrichr genes in functional annotation
Genes.Species	Species genes in functional annotation (which are translated to Enrichr genes)

## Sheet: cTEC
ID	Description	GeneRatio	BgRatio	pvalue	p.adjust	qvalue	geneID	Count	Cluster	Direction
GO:0006457	protein folding	36/1210	173/28891	1.16786e-15	6.3952e-12	4.68988e-12	Clu/Nppc/Hspb1/Pfdn4/Ppic/H2-DMb1/Cct7/Bag5/Unc45a/Fkbp4/Pex19/Tbcc/Dnajb1/Dnajc3/Pdia4/Pdcl3/Pdrg1/Chchd4/Hsp90b1/Dnajb6/Stub1/Tbca/Dnaja2/Pfdn2/Hspa5/P4hb/Tbcb/Cct2/Hspd1/Tcp1/Grpel1/Sdf2/Sh3glb1/Cct6a/Hsp90ab1/Cct8	36	GO_BP	up
GO:0009060	aerobic respiration	35/1210	196/28891	3.56206e-13	7.65283e-10	5.61216e-10	Nupr1/Cox8b/Idh1/Mdh2/Cox7a2/Cycs/Coq7/Ndufab1/Uqcrc2/Aco2/Idh2/Sdhb/Ndufa6/Ndufc2/Uqcrfs1/Ndufc1/Pdhb/Ndufb9/Cyc1/Ndufs4/Cox6a1/Uqcrb/Atp5pb/Ndufa12/Iscu/Cox5b/Ndufs5/Suclg1/Ndufa8/Cox5a/Uqcrh/Cox4i1/Cox7c/Ndufb8/Ndufb6	35	GO_BP	up
GO:0043161	proteasome-mediated ubiquitin-dependent protein catabolic process	56/1210	451/28891	4.19257e-13	7.65283e-10	5.61216e-10	Il33/Trim63/Clu/Kctd13/Plk2/Nedd4l/Selenos/Tbl1xr1/Trib2/Trib1/Gipc1/Bag5/Kctd2/Ufd1/Psmb5/Jkamp/Gsk3a/Gclc/Derl1/Rnf5/Sec61b/Rnf126/Fbxo9/Amn1/Ubqln1/Psmc2/Dda1/Hsp90b1/Psmc6/Skp1/Klhdc2/Nfe2l2/Stub1/Fbxo6/Rbx1/Ubxn2a/Psmc3/Cdc34/Psmc5/Hspa5/Faf2/Psmc4/Nsfl1c/Ube2b/Csnk1e/Psmd6/Psmc1/Pcnp/Ube2n/Psmd8/Akirin2/Bcap31/Psmb3/Csnk1a1/Ube2d3/Psmd4	56	GO_BP	up
GO:0019646	aerobic electron transport chain	20/1210	64/28891	8.00357e-13	1.09569e-09	8.03516e-10	Cox8b/Cox7a2/Cycs/Uqcrc2/Sdhb/Ndufc2/Uqcrfs1/Ndufb9/Cyc1/Cox6a1/Uqcrb/Iscu/Cox5b/Ndufa8/Cox5a/Uqcrh/Cox4i1/Cox7c/Ndufb8/Ndufb6	20	GO_BP	up
GO:0042775	mitochondrial ATP synthesis coupled electron transport	22/1210	80/28891	1.06482e-12	1.16619e-09	8.55218e-10	Cox8b/Cox7a2/Cycs/Coq7/Uqcrc2/Sdhb/Ndufc2/Uqcrfs1/Ndufb9/Cyc1/Cox6a1/Uqcrb/Ndufa12/Iscu/Cox5b/Ndufa8/Cox5a/Uqcrh/Cox4i1/Cox7c/Ndufb8/Ndufb6	22	GO_BP	up
GO:0042773	ATP synthesis coupled electron transport	22/1210	82/28891	1.84417e-12	1.68311e-09	1.2343e-09	Cox8b/Cox7a2/Cycs/Coq7/Uqcrc2/Sdhb/Ndufc2/Uqcrfs1/Ndufb9/Cyc1/Cox6a1/Uqcrb/Ndufa12/Iscu/Cox5b/Ndufa8/Cox5a/Uqcrh/Cox4i1/Cox7c/Ndufb8/Ndufb6	22	GO_BP	up
GO:0034976	response to endoplasmic reticulum stress	40/1210	266/28891	2.43853e-12	1.90763e-09	1.39895e-09	Clu/Nupr1/Aqp11/Stc2/Selenos/Manf/Cebpb/Tmbim6/Ufd1/Serp1/Jkamp/Dnajc3/Get4/Derl1/Rnf5/Pdia4/Sec61b/Tmed2/Nrbf2/Ubqln1/Hsp90b1/Psmc6/Nfe2l2/Stub1/Fbxo6/Flot1/Hspa5/Faf2/Bax/P4hb/Gorasp2/Nr1h2/Atf4/Nfe2l1/Bcap31/Uba5/Fis1/Ufc1/Selenok/Eif2s1	40	GO_BP	up
GO:0006119	oxidative phosphorylation	29/1210	147/28891	2.83114e-12	1.93792e-09	1.42116e-09	Nupr1/Cox8b/Cox7a2/Cycs/Coq7/Ndufab1/Uqcrc2/Sdhb/Ndufa6/Ndufc2/Uqcrfs1/Ndufc1/Ndufb9/Cyc1/Ndufs4/Cox6a1/Uqcrb/Atp5pb/Ndufa12/Iscu/Cox5b/Ndufs5/Ndufa8/Cox5a/Uqcrh/Cox4i1/Cox7c/Ndufb8/Ndufb6	29	GO_BP	up
GO:0072594	establishment of protein localization to organelle	54/1210	452/28891	5.08451e-12	3.09364e-09	2.2687e-09	Il33/Clu/Cdkn1a/Sh3kbp1/Srprb/Vps36/Timm17a/Maip1/Pmpcb/Notch1/Cct7/Tomm40/Ubl4a/Srp14/Srp72/Srp68/Pex19/Prkcd/Srpr/Tsg101/Becn1/Gsk3a/Sec13/Nfkbia/Get4/Spcs2/Ing1/Sec61b/Pttg1ip/Pam16/Tomm20/Wbp2/Srp19/Chchd4/Ppp3r1/Hspa5/Bax/Rala/Cct2/Hspd1/Tcp1/Grpel1/Sh3glb1/Akirin2/Bcap31/Cct6a/Srp9/Jup/Rab11a/Fis1/Hsp90ab1/Lamp2/Zfand6/Cct8	54	GO_BP	up
GO:0006979	response to oxidative stress	49/1210	389/28891	7.31247e-12	3.69917e-09	2.71277e-09	Gpx2/Fyn/Mctp1/Grk2/Hspb1/Stc2/Selenos/Atp13a2/Nr4a2/Cygb/Dapk1/Ripk1/Pycr2/Idh1/Mmp2/Nqo1/Rhob/Psmb5/Pyroxd1/Ucp2/1600014C10Rik/Prkcd/Txnrd1/Gclc/Coq7/Net1/Arl6ip5/Chchd4/Ndufa6/Nfkb1/Prdx2/Aldh3a2/Nfe2l2/Atox1/Stk25/Mapk3/Trp53inp1/Prdx5/Gsr/Hdac2/Atf4/Nfe2l1/Gclm/Ndufa12/Gpx4/Prdx1/Rbpms/Selenok/Eif2s1	49	GO_BP	up
GO:0006091	generation of precursor metabolites and energy	56/1210	484/28891	7.43077e-12	3.69917e-09	2.71277e-09	Nupr1/Cox8b/Pgm1/Adrb1/Tkt/Cox17/Idh1/Mdh2/Ppp1r2/Ucp2/Ier3/Cox7a2/Gsk3a/Fdx1/Cycs/Coq7/Ndufab1/Uqcrc2/Kat2b/Etfa/Aco2/Idh2/Sdhb/Chchd4/Ndufa6/Gapdh/Mlx/Crot/Taldo1/Ndufc2/Gfpt1/Uqcrfs1/Ndufc1/Bax/Pdhb/Ndufb9/Cyc1/Ndufs4/Cox6a1/Uqcrb/Tcf7l2/Atp5pb/Ndufa12/Pgls/Iscu/Cox5b/Adh5/Ndufs5/Suclg1/Ndufa8/Cox5a/Uqcrh/Cox4i1/Cox7c/Ndufb8/Ndufb6	56	GO_BP	up
GO:0022904	respiratory electron transport chain	24/1210	106/28891	9.81232e-12	4.23854e-09	3.1083e-09	Cox8b/Cox7a2/Cycs/Coq7/Uqcrc2/Etfa/Sdhb/Ndufc2/Uqcrfs1/Ndufb9/Cyc1/Ndufs4/Cox6a1/Uqcrb/Ndufa12/Iscu/Cox5b/Ndufa8/Cox5a/Uqcrh/Cox4i1/Cox7c/Ndufb8/Ndufb6	24	GO_BP	up
GO:0045333	cellular respiration	38/1210	254/28891	1.00623e-11	4.23854e-09	3.1083e-09	Nupr1/Cox8b/Idh1/Mdh2/Cox7a2/Cycs/Coq7/Ndufab1/Uqcrc2/Etfa/Aco2/Idh2/Sdhb/Chchd4/Ndufa6/Ndufc2/Uqcrfs1/Ndufc1/Bax/Pdhb/Ndufb9/Cyc1/Ndufs4/Cox6a1/Uqcrb/Atp5pb/Ndufa12/Iscu/Cox5b/Ndufs5/Suclg1/Ndufa8/Cox5a/Uqcrh/Cox4i1/Cox7c/Ndufb8/Ndufb6	38	GO_BP	up
GO:0022900	electron transport chain	25/1210	116/28891	1.16538e-11	4.55832e-09	3.34281e-09	Cox8b/Cox7a2/Fdx1/Cycs/Coq7/Uqcrc2/Etfa/Sdhb/Ndufc2/Uqcrfs1/Ndufb9/Cyc1/Ndufs4/Cox6a1/Uqcrb/Ndufa12/Iscu/Cox5b/Ndufa8/Cox5a/Uqcrh/Cox4i1/Cox7c/Ndufb8/Ndufb6	25	GO_BP	up
GO:1904951	positive regulation of establishment of protein localization	45/1210	362/28891	8.16829e-11	2.98197e-08	2.18681e-08	Sfn/Fyn/Cd81/Rapgef4/Hras/Tmem30b/Atp13a2/Lrp1/Cib1/Cct7/Capn10/Osbp/Serp1/Cdk5/Prkcd/Tsg101/Gsk3a/Ier3ip1/Sox4/Rac1/Frmd4a/Prkar1a/Bsg/Glul/Arf6/Kif5b/Gas6/Gna11/Nr1h2/Sar1b/Cct2/Arf1/Tcp1/Tcf7l2/Sh3glb1/Dynll1/Oaz1/Bcap31/Cct6a/Jup/Fis1/Hsp90ab1/Tmem30a/Anp32b/Cct8	45	GO_BP	up
GO:0015980	energy derivation by oxidation of organic compounds	44/1210	350/28891	9.16129e-11	3.13545e-08	2.29936e-08	Nupr1/Cox8b/Pgm1/Adrb1/Idh1/Mdh2/Ppp1r2/Cox7a2/Gsk3a/Cycs/Coq7/Ndufab1/Uqcrc2/Etfa/Aco2/Idh2/Sdhb/Chchd4/Ndufa6/Ndufc2/Gfpt1/Uqcrfs1/Ndufc1/Bax/Pdhb/Ndufb9/Cyc1/Ndufs4/Cox6a1/Uqcrb/Tcf7l2/Atp5pb/Ndufa12/Iscu/Cox5b/Ndufs5/Suclg1/Ndufa8/Cox5a/Uqcrh/Cox4i1/Cox7c/Ndufb8/Ndufb6	44	GO_BP	up
GO:0045454	cell redox homeostasis	13/1210	31/28891	1.16795e-10	3.76217e-08	2.75896e-08	Selenos/Egln2/Txnrd1/Gclc/Prdx2/Nfe2l2/Prdx5/Glrx3/Gsr/Nfe2l1/Txn2/Selenot/Prdx1	13	GO_BP	up
GO:0097193	intrinsic apoptotic signaling pathway	42/1210	327/28891	1.24318e-10	3.78204e-08	2.77353e-08	Clu/Sfn/Cdkn1a/Fyn/Nupr1/Nherf1/Hspb1/Hras/Selenos/Aen/Aldh2/Cebpb/Polb/Tmbim6/Perp/Bag5/Cdkn2d/Tmem109/Mllt11/Vdac2/Ier3/Becn1/Cycs/Pttg1ip/Ybx3/Ubqln1/Arl6ip5/Nfe2l2/Stk25/Bax/Mif/Ptpmt1/P4hb/Rps27l/Hdac2/Atf4/Mcl1/Sh3glb1/Bcap31/Fis1/Selenok/Rnf7	42	GO_BP	up
GO:0042176	regulation of protein catabolic process	45/1210	369/28891	1.54225e-10	4.33552e-08	3.17943e-08	Il33/Clu/Fyn/Cd81/Plk2/Nupr1/Aqp11/Serpine2/Nedd4l/Atp13a2/Alad/Trib2/Lrp1/Trib1/Gipc1/Egln2/Nqo1/Bag5/Ier3/Gsk3a/Ezr/Gclc/Pithd1/Pttg1ip/Psme2/Psme3ip1/Gabarapl2/Ubqln1/Sox9/Dda1/Snx3/Pin1/Stub1/Tmf1/Timp2/Rbx1/Ubxn2a/Mylip/Csnk1e/Nfe2l1/Vgll4/Oaz1/Bcap31/Hsp90ab1/Csnk1a1	45	GO_BP	up
GO:0032543	mitochondrial translation	25/1210	130/28891	1.58346e-10	4.33552e-08	3.17943e-08	Mrpl53/Mrps18b/Mrpl57/Mrps5/Mrpl46/Mrpl17/Mrpl48/Mrpl18/Mrpl58/Mrpl38/Mrpl14/Mrps10/Mrpl20/Mrpl43/Mrpl32/Tsfm/Mrps28/Mrps33/Mrpl9/Mrps14/Aurkaip1/Mrps12/Mrpl13/Mrpl42/Mrps7	25	GO_BP	up
GO:0090150	establishment of protein localization to membrane	37/1210	270/28891	2.48532e-10	6.48078e-08	4.75264e-08	Cd24a/Fyn/Aqp11/Hras/Srprb/Rab3ip/Maip1/Blzf1/Cib1/Tomm40/Ubl4a/Srp14/Srp72/Srp68/Krt18/Pex19/Gdi1/Cdk5/Srpr/Emc4/Get4/Sec61b/Srp19/Emc8/Hspa5/Bax/Emc6/Gorasp2/Snap47/Rab5if/Emc7/Snx27/Sh3glb1/Srp9/Rab11a/Fis1/Wdr83os	37	GO_BP	up
GO:0035966	response to topologically incorrect protein	25/1210	135/28891	3.67053e-10	9.13628e-08	6.70003e-08	Clu/Hspb1/Stc2/Selenos/Manf/Tmbim6/Ufd1/Serp1/Hspb8/Jkamp/Dnajc3/Derl1/Rnf5/Rnf126/Tmed2/Nfe2l2/Stub1/Fbxo6/Hspa5/Faf2/Bax/Atf4/Hspd1/Akirin2/Eif2s1	25	GO_BP	up
GO:0061077	chaperone-mediated protein folding	17/1210	66/28891	1.21103e-09	2.88331e-07	2.11446e-07	Clu/Hspb1/H2-DMb1/Cct7/Unc45a/Fkbp4/Pex19/Dnajb1/Pdia4/Pdcl3/Dnajb6/Hspa5/Cct2/Tcp1/Sdf2/Cct6a/Cct8	17	GO_BP	up
GO:0009117	nucleotide metabolic process	52/1210	497/28891	1.55271e-09	3.54277e-07	2.59807e-07	Ces1d/Pdk4/Atp1b1/Nppc/Dera/Urah/Upb1/Acot1/Noct/Tkt/Idh1/Nqo1/Mdh2/Fdx1/Txnrd1/Dut/Vdac1/Ndufab1/Nudt3/Nudt2/Ppcs/Coasy/Gpd2/Idh2/Sdhb/Ndufa6/Nudt18/Ak2/Crot/Taldo1/Ndufc2/Papss1/Gmpr/Ndufc1/Prdx5/Lacc1/Pdhb/Mpc1/Ndufb9/Ndufs4/Mcee/Cmpk1/Atp5pb/Ndufa12/Pgls/Dcxr/Ndufs5/Fis1/Suclg1/Ndufa8/Ndufb8/Ndufb6	52	GO_BP	up
GO:0051402	neuron apoptotic process	43/1210	369/28891	1.62112e-09	3.55091e-07	2.60403e-07	Sncb/Clu/Nppc/Fyn/Nupr1/Hras/Foxq1/Nr4a2/Cebpb/Polb/Six1/Ripk1/Lrp1/Mdk/Tmbim6/Egln2/Nqo1/Tuba1a/Akt1s1/Ucp2/Casp8/Cdk5/Btg2/Gsk3a/Aimp2/Gclc/Cx3cl1/Prdx2/Tmbim4/Gapdh/Pin1/Ube2m/Cdc34/Bax/Atf4/Hspd1/Mcl1/Ndufs4/Gclm/Nfix/Fis1/Hsp90ab1/Set	43	GO_BP	up
GO:0031647	regulation of protein stability	39/1210	316/28891	1.81275e-09	3.76714e-07	2.76261e-07	Clu/Atp1b1/Cd81/Nedd4l/Fam107a/Gsn/Gipc1/Cct7/Bag5/Ubl4a/Pex19/Isoc2b/Rnf149/Get4/Derl1/Rnf5/Pdcl3/Sox4/Tcf3/Zbed3/Ddost/Atp1b3/Gapdh/Pim1/Pin1/Stub1/Hypk/Flot1/Mylip/Ube2b/Gtpbp4/Cct2/Hspd1/Tcp1/Cct6a/Hsp90ab1/Lamp2/Sugt1/Cct8	39	GO_BP	up
GO:0006605	protein targeting	38/1210	303/28891	1.85743e-09	3.76714e-07	2.76261e-07	Clu/Fyn/Aqp11/Hras/Srprb/Rab3ip/Timm17a/Pick1/Pmpcb/Gipc1/Cib1/Tomm40/Ubl4a/Srp14/Srp72/Srp68/Syngr1/Pex19/Gdi1/Cdk5/Srpr/Becn1/Gsk3a/Get4/Spcs2/Sec61b/Pam16/Tomm20/Srp19/Chchd4/Hspa5/Hspd1/Grpel1/Bcap31/Srp9/Fis1/Lamp2/Zfand6	38	GO_BP	up
GO:0007015	actin filament organization	50/1210	471/28891	1.96551e-09	3.84398e-07	2.81896e-07	Gm14137/Rgs4/Capg/Rhov/Kctd13/Pls1/Cdc42ep2/Rhou/Rgcc/Fam107a/Nebl/Sh3kbp1/Marcksl1/Tagln2/Fmn1/Pick1/Phactr1/Gsn/Rhob/Rflnb/Prkcd/Map3k1/Ezr/Vasp/Arpc5/Arpc1b/Rhoc/Cap1/S100a10/Cx3cl1/Sdc4/Arpc1a/Rac1/Zbed3/Actg1/Pdlim1/Rnh1/Hsp90b1/Arf6/Cnn3/Bin1/Arf1/Cttn/Twf1/Capzb/Grb2/Arpc5l/Arpc3/Mtpn/Tpm3	50	GO_BP	up
GO:0006163	purine nucleotide metabolic process	48/1210	444/28891	2.28016e-09	4.30557e-07	3.15746e-07	Ces1d/Pdk4/Atp1b1/Nppc/Urah/Acot1/Noct/Tkt/Idh1/Nqo1/Mdh2/Fdx1/Txnrd1/Vdac1/Ndufab1/Nudt3/Nudt2/Ppcs/Coasy/Gpd2/Idh2/Sdhb/Ndufa6/Nudt18/Ak2/Crot/Taldo1/Ndufc2/Papss1/Gmpr/Ndufc1/Prdx5/Lacc1/Pdhb/Mpc1/Ndufb9/Ndufs4/Mcee/Atp5pb/Ndufa12/Pgls/Dcxr/Ndufs5/Fis1/Suclg1/Ndufa8/Ndufb8/Ndufb6	48	GO_BP	up
GO:0072521	purine-containing compound metabolic process	50/1210	479/28891	3.46018e-09	6.23861e-07	4.57504e-07	Ces1d/Pdk4/Atp1b1/Nppc/Urah/Acot1/Noct/Tkt/Idh1/Nqo1/Mdh2/Fdx1/Txnrd1/Vdac1/Ndufab1/Nudt3/Nudt2/Ppcs/Coasy/Gpd2/Idh2/Sdhb/Ndufa6/Nudt18/Ak2/Pcmt1/Crot/Taldo1/Ndufc2/Papss1/Gmpr/Ndufc1/Prdx5/Lacc1/Pdhb/Mpc1/Ndufb9/Ndufs4/Mcee/Atp5pb/Ndufa12/Oard1/Pgls/Dcxr/Ndufs5/Fis1/Suclg1/Ndufa8/Ndufb8/Ndufb6	50	GO_BP	up
GO:0043523	regulation of neuron apoptotic process	38/1210	310/28891	3.53172e-09	6.23861e-07	4.57504e-07	Sncb/Clu/Nppc/Fyn/Nupr1/Hras/Foxq1/Nr4a2/Cebpb/Six1/Ripk1/Lrp1/Mdk/Egln2/Nqo1/Akt1s1/Ucp2/Casp8/Cdk5/Btg2/Gsk3a/Aimp2/Gclc/Cx3cl1/Prdx2/Tmbim4/Pin1/Ube2m/Cdc34/Bax/Atf4/Hspd1/Mcl1/Gclm/Nfix/Fis1/Hsp90ab1/Set	38	GO_BP	up
GO:2001233	regulation of apoptotic signaling pathway	47/1210	437/28891	3.94741e-09	6.75501e-07	4.95375e-07	Clu/Fyn/Bmi1/Nupr1/Nherf1/Hspb1/Selenos/Nr4a2/Tnfrsf12a/Ripk1/Hmgb2/Eef1e1/Tmbim6/Itm2c/Bag5/Cdkn2d/Vdac2/Casp8/Ier3/Prkcd/Becn1/Gclc/Pttg1ip/Ltbr/Ybx3/Cx3cl1/Pam16/Ubqln1/Il7/Ctsl/Prdx2/Nfe2l2/Bax/Mif/Ptpmt1/P4hb/Hdac2/Slc25a5/Atf4/Ghitm/Mcl1/Cttn/Gclm/Tcf7l2/Sh3glb1/Bcap31/Fis1	47	GO_BP	up
GO:0016050	vesicle organization	41/1210	359/28891	6.96335e-09	1.15549e-06	8.47374e-07	Cav2/Rab3a/Aqp11/Serpine2/Nectin2/Atp13a2/Rab13/Atp6v1e1/Atp6v1g1/Bloc1s4/Trappc6b/Osbp/Plekhj1/Tsg101/Sec13/Chmp4c/Chmp1b/Trappc2/Plekhf2/Chmp5/S100a10/Rab20/Sdc4/Trappc4/Snapin/Uso1/Snx3/Tmf1/Trappc2l/Stx7/Rnasek/Atp6v1d/Kif5b/Stx11/Snap47/Vapa/Sar1b/Arf1/Stx6/Rab11a/Atp6v1f	41	GO_BP	up
GO:0051222	positive regulation of protein transport	40/1210	346/28891	7.50275e-09	1.20838e-06	8.86161e-07	Sfn/Fyn/Cd81/Rapgef4/Hras/Tmem30b/Atp13a2/Lrp1/Cib1/Capn10/Osbp/Serp1/Cdk5/Prkcd/Tsg101/Gsk3a/Ier3ip1/Sox4/Rac1/Frmd4a/Prkar1a/Bsg/Glul/Arf6/Kif5b/Gas6/Gna11/Nr1h2/Sar1b/Arf1/Tcf7l2/Sh3glb1/Dynll1/Oaz1/Bcap31/Jup/Fis1/Hsp90ab1/Tmem30a/Anp32b	40	GO_BP	up
GO:1901652	response to peptide	48/1210	464/28891	9.47696e-09	1.48274e-06	1.08736e-06	Gdf15/Cav2/Ptpre/Cdo1/Pdk4/Fyn/Grk2/Hras/Nr4a2/Nucb2/Jag1/Rab13/Sgk1/Lrp1/Notch1/Eif2b3/Mmp2/Capn10/Irf1/Kbtbd2/Cdk5/Prkcd/Socs1/Adrm1/Gsk3a/Nfkbia/Chmp5/Rbm4/Pip4k2c/Ctsd/Rac1/Zbed3/Kat2b/Prkar1a/Uso1/Nfkb1/Leprotl1/Nfe2l2/Mapk3/Eif2b2/Adipor1/Slc27a1/Snx5/Cyc1/Anxa5/Hadha/Fis1/Grb2	48	GO_BP	up
GO:0070972	protein localization to endoplasmic reticulum	17/1210	78/28891	1.878e-08	2.85665e-06	2.09491e-06	Srprb/Ubl4a/Srp14/Srp72/Srp68/Kdelr2/Srpr/Get4/Spcs2/Rer1/Sec61b/Gabarapl2/Srp19/Hspa5/Vapa/Bcap31/Srp9	17	GO_BP	up
GO:0010959	regulation of metal ion transport	47/1210	461/28891	2.1217e-08	3.14011e-06	2.30278e-06	Stc1/Cxcl1/Gnao1/Rgs4/Atp1b1/Dpp10/Rgs9/Fyn/Serpine2/Prss8/Nherf1/Stc2/Nedd4l/Tmem38a/Stac/Cxcl10/Adrb1/Sgk1/Pick1/Ubash3b/Tmbim6/Fxyd3/Hes1/Scn1b/Gnb2/Cdk5/Stk39/Vdac1/S100a1/Stim2/Cx3cl1/Ubqln1/1810037I17Rik/Atp1a1/Atp1b3/Kif5b/Ppp3r1/Bax/Bin1/Hbp1/Calm3/Atf4/Arf1/Snx27/Calm1/Iscu/Fkbp1a	47	GO_BP	up
GO:2001234	negative regulation of apoptotic signaling pathway	32/1210	253/28891	2.83324e-08	4.08285e-06	2.99413e-06	Clu/Fyn/Bmi1/Hspb1/Selenos/Nr4a2/Ripk1/Hmgb2/Tmbim6/Bag5/Cdkn2d/Vdac2/Ier3/Gclc/Pttg1ip/Ybx3/Cx3cl1/Pam16/Il7/Prdx2/Nfe2l2/Bax/Mif/Hdac2/Slc25a5/Atf4/Ghitm/Mcl1/Cttn/Gclm/Tcf7l2/Sh3glb1	32	GO_BP	up
GO:0140053	mitochondrial gene expression	25/1210	166/28891	2.96858e-08	4.1682e-06	3.05672e-06	Mrpl53/Mrps18b/Mrpl57/Mrps5/Mrpl46/Mrpl17/Mrpl48/Mrpl18/Mrpl58/Mrpl38/Mrpl14/Mrps10/Mrpl20/Mrpl43/Mrpl32/Tsfm/Mrps28/Mrps33/Mrpl9/Mrps14/Aurkaip1/Mrps12/Mrpl13/Mrpl42/Mrps7	25	GO_BP	up
GO:0006986	response to unfolded protein	20/1210	112/28891	3.9312e-08	5.38182e-06	3.94672e-06	Hspb1/Stc2/Selenos/Manf/Tmbim6/Serp1/Hspb8/Jkamp/Dnajc3/Derl1/Tmed2/Nfe2l2/Stub1/Fbxo6/Hspa5/Faf2/Bax/Atf4/Hspd1/Eif2s1	20	GO_BP	up
GO:1990778	protein localization to cell periphery	42/1210	400/28891	5.20336e-08	6.94966e-06	5.09649e-06	Atp1b1/Rab3a/Dpp10/Gpc6/Fyb/Cd81/Rapgef4/Pls1/Nherf1/Hras/Stac/Rab13/Lrp1/Blzf1/Cib1/Krt18/Fyb2/Cdk5/Ezr/Rer1/Tmed2/S100a10/Rac1/Arl6ip5/Atp1b3/Bsg/Arf6/Stx7/Kif5b/Flot1/Gas6/Myl12a/Gorasp2/Snap47/Tmem59/Pdzd11/Snx27/Ift20/Jup/Csnk2a1/Rab11a/Lin7c	42	GO_BP	up
GO:0051701	biological process involved in interaction with host	24/1210	159/28891	5.33856e-08	6.96046e-06	5.10441e-06	Cav2/Tmprss2/Grk2/Nectin2/Dynlt1f/Gsn/Exoc7/Zfp639/Dynlt1c/Tsg101/Chmp4c/Chmp1b/Slc3a2/Chmp5/Trim8/Snx3/Bsg/Rnasek/Thoc7/Gas6/P4hb/Vapa/Ly6e/Ddx39b	24	GO_BP	up
GO:0072659	protein localization to plasma membrane	36/1210	315/28891	5.59888e-08	7.10921e-06	5.21349e-06	Atp1b1/Rab3a/Dpp10/Fyb/Cd81/Pls1/Nherf1/Stac/Rab13/Lrp1/Blzf1/Cib1/Krt18/Fyb2/Cdk5/Ezr/Rer1/Tmed2/S100a10/Rac1/Arl6ip5/Atp1b3/Bsg/Arf6/Stx7/Kif5b/Flot1/Gas6/Myl12a/Gorasp2/Tmem59/Snx27/Ift20/Jup/Csnk2a1/Rab11a	36	GO_BP	up
GO:0033108	mitochondrial respiratory chain complex assembly	19/1210	104/28891	5.84212e-08	7.10921e-06	5.21349e-06	Cox17/Ndufaf6/Cox19/Ndufaf3/Ndufab1/Uqcc6/Chchd4/Ndufa6/Ndufc2/Ndufc1/Uqcc4/Ndufb9/Ndufs4/Ndufa12/Cox14/Ndufs5/Ndufa8/Ndufb8/Ndufb6	19	GO_BP	up
GO:0035967	cellular response to topologically incorrect protein	19/1210	104/28891	5.84212e-08	7.10921e-06	5.21349e-06	Stc2/Selenos/Tmbim6/Ufd1/Serp1/Hspb8/Dnajc3/Derl1/Rnf5/Rnf126/Tmed2/Nfe2l2/Stub1/Hspa5/Bax/Atf4/Hspd1/Akirin2/Eif2s1	19	GO_BP	up
GO:1905475	regulation of protein localization to membrane	28/1210	212/28891	8.17473e-08	9.73148e-06	7.13652e-06	Dpp10/Gpc6/Sorbs2/Fyn/Cd81/Rapgef4/Pls1/Hras/Stac/Lrp1/Gsn/Cib1/Gdi1/Cdk5/Shisa6/Ezr/Rer1/Tmed2/Arf6/Stx7/Kif5b/Tmem59/Snx27/Sh3glb1/Csnk2a1/Rab11a/Fis1/Cript	28	GO_BP	up
GO:0022411	cellular component disassembly	45/1210	462/28891	1.59448e-07	1.83583e-05	1.3463e-05	Cd24a/Capg/Dnase2a/Sgk1/Gsn/Cib1/Napa/Capn10/Pnpla2/H2ac25/Cdk5/Pelo/Becn1/Gsk3a/Chmp4c/Chmp1b/Chmp5/Map1lc3a/Vdac1/Dnajc17/Gabarapl2/Ubqln1/Snapin/Mrpl58/Cebpg/Slc25a46/Arf6/Smarcd2/Kif5b/Flot1/Fundc1/Bax/Zmpste24/Slc25a5/Cttn/Twf1/Atg3/Calm1/Uba5/Capzb/Fis1/Lamp2/Mtpn/Ufc1/Septin7	45	GO_BP	up
GO:0045862	positive regulation of proteolysis	39/1210	372/28891	1.6092e-07	1.83583e-05	1.3463e-05	Il33/Clu/F3/Fyn/Plk2/Nupr1/Dapk1/Trib2/Timm17a/Trib1/Gsn/Perp/Casp8/Tbc1d10a/Gsk3a/Cycs/Gclc/Psme2/S100a10/Ubqln1/Ctsd/Ctsl/Arl6ip5/Dda1/Plgrkt/Stub1/Rbx1/Bax/Csnk1e/Rps27l/Hdac2/Hspd1/Akirin2/Aurkaip1/Bcap31/Fis1/Csnk1a1/Anp32b/Rnf7	39	GO_BP	up
GO:0032970	regulation of actin filament-based process	41/1210	402/28891	1.65198e-07	1.84618e-05	1.35388e-05	Stc1/Gm14137/Rgs4/Capg/Smim22/Cdc42ep2/Hras/Rgcc/Fam107a/Adrb1/Fmn1/Pick1/Lrp1/Gsn/Capn10/Prkcd/Map3k1/Vasp/Arpc5/Rhoc/S100a10/Cx3cl1/Sdc4/Rac1/Actg1/Atp1a1/Rnh1/Arf6/Dsc2/Bin1/Hdac2/Rala/Arf1/Cttn/Twf1/Jup/Capzb/Grb2/Arpc5l/Arpc3/Mtpn	41	GO_BP	up
GO:0061136	regulation of proteasomal protein catabolic process	26/1210	195/28891	1.94259e-07	2.07973e-05	1.52515e-05	Il33/Clu/Plk2/Nupr1/Aqp11/Alad/Trib2/Trib1/Gipc1/Bag5/Gsk3a/Gclc/Pithd1/Psme2/Psme3ip1/Gabarapl2/Ubqln1/Dda1/Stub1/Tmf1/Rbx1/Csnk1e/Nfe2l1/Bcap31/Hsp90ab1/Csnk1a1	26	GO_BP	up
GO:0044000	movement in host	20/1210	123/28891	1.96194e-07	2.07973e-05	1.52515e-05	Cav2/Tmprss2/Grk2/Nectin2/Gsn/Exoc7/Zfp639/Tsg101/Chmp4c/Chmp1b/Slc3a2/Chmp5/Trim8/Snx3/Bsg/Rnasek/Gas6/P4hb/Vapa/Ly6e	20	GO_BP	up
GO:0006839	mitochondrial transport	23/1210	158/28891	1.97491e-07	2.07973e-05	1.52515e-05	Dynlt1f/Timm17a/Maip1/Pmpcb/Tomm40/Ucp2/Vdac2/Ier3/Dynlt1c/Gsk3a/Gclc/Pam16/Tomm20/Slc25a46/Chchd4/Kif5b/Bax/Slc25a5/Hspd1/Grpel1/Sh3glb1/Bcap31/Fis1	23	GO_BP	up
GO:1901653	cellular response to peptide	37/1210	346/28891	2.02308e-07	2.09026e-05	1.53288e-05	Gdf15/Cav2/Ptpre/Pdk4/Fyn/Grk2/Hras/Nr4a2/Nucb2/Rab13/Sgk1/Lrp1/Capn10/Irf1/Cdk5/Prkcd/Socs1/Adrm1/Gsk3a/Chmp5/Rbm4/Pip4k2c/Ctsd/Rac1/Kat2b/Prkar1a/Uso1/Nfkb1/Leprotl1/Nfe2l2/Mapk3/Adipor1/Slc27a1/Snx5/Anxa5/Fis1/Grb2	37	GO_BP	up
GO:0045047	protein targeting to ER	12/1210	45/28891	2.20141e-07	2.23239e-05	1.63711e-05	Srprb/Ubl4a/Srp14/Srp72/Srp68/Srpr/Get4/Spcs2/Sec61b/Srp19/Hspa5/Srp9	12	GO_BP	up
GO:0009636	response to toxic substance	21/1210	136/28891	2.41616e-07	2.40562e-05	1.76415e-05	Cyp2f2/Gpx2/Ces1d/Nupr1/Nr4a2/Aldh2/Nqo1/Ephx1/Scn1b/Prdx2/Nfe2l2/Pim1/Ralbp1/Mapk3/Bax/Gsr/Akr1a1/Selenot/Esd/Prdx1/Adh5	21	GO_BP	up
GO:0071496	cellular response to external stimulus	36/1210	335/28891	2.61022e-07	2.55242e-05	1.8718e-05	Dapl1/Asgr1/Pdk4/Cdkn1a/Nr4a2/Fam107a/Got1/Pick1/Becn1/Sec13/Map1lc3a/Gabarapl2/Ttc5/Sox9/Rac1/Kat2b/Atp1a1/Usf2/Tmem87a/Glul/Nfe2l2/Mlx/Pim1/Mapk3/Gas6/Dsc2/Hspa5/Atf4/Rraga/Comt/Tcf7l2/Sh3glb1/Ralb/Lamp2/Csnk1a1/Eif2s1	36	GO_BP	up
GO:0006612	protein targeting to membrane	20/1210	126/28891	2.9385e-07	2.82303e-05	2.07025e-05	Fyn/Aqp11/Hras/Srprb/Rab3ip/Cib1/Ubl4a/Srp14/Srp72/Srp68/Pex19/Gdi1/Cdk5/Srpr/Get4/Sec61b/Srp19/Hspa5/Srp9/Fis1	20	GO_BP	up
GO:0031669	cellular response to nutrient levels	29/1210	239/28891	3.04812e-07	2.87785e-05	2.11045e-05	Dapl1/Pdk4/Cdkn1a/Fam107a/Pick1/Becn1/Sec13/Map1lc3a/Gabarapl2/Ttc5/Kat2b/Usf2/Glul/Nfe2l2/Mlx/Pim1/Mapk3/Gas6/Dsc2/Hspa5/Atf4/Rraga/Comt/Tcf7l2/Sh3glb1/Ralb/Lamp2/Csnk1a1/Eif2s1	29	GO_BP	up
GO:1904062	regulation of monoatomic cation transmembrane transport	38/1210	367/28891	3.16871e-07	2.94099e-05	2.15676e-05	Rgs4/Atp1b1/Dpp10/Rgs9/Fyn/Prss8/Nherf1/Nedd4l/Tmem38a/Stac/Cxcl10/Adrb1/Pick1/Ubash3b/Tmbim6/Cox17/Fxyd3/Scn1b/Gnb2/Cdk5/Stk39/Vdac1/S100a1/Stim2/Cx3cl1/Ubqln1/1810037I17Rik/Atp1b3/Kif5b/Ppp3r1/Bax/Bin1/Calm3/Arf1/Snx27/Calm1/Iscu/Fkbp1a	38	GO_BP	up
GO:0016236	macroautophagy	31/1210	268/28891	3.5214e-07	3.21386e-05	2.35686e-05	Nupr1/Dcn/Atp13a2/Hspb8/Becn1/Chmp4c/Chmp1b/Chmp5/Rnf5/Map1lc3a/Vdac1/Pip4k2c/Gabarapl2/Ubqln1/Ctsd/Snapin/Scoc/Mapk3/Ubxn2a/Trp53inp1/Nsfl1c/Emc6/Slc25a5/Ift20/Atg3/Sh3glb1/Calm1/Ralb/Uba5/Lamp2/Ufc1	31	GO_BP	up
GO:0006631	fatty acid metabolic process	44/1210	463/28891	4.32586e-07	3.78171e-05	2.77329e-05	Olah/Bdh2/Cyp2f2/Acbd7/Cyp2g1/Ces1d/Cyp2a5/Ces1b/Pdk4/Ces2c/Edn2/Cryl1/Hpgd/Nucb2/Peds1/Cygb/Acot1/Hacd2/Elovl7/Auh/Ephx1/Slc25a17/Prxl2b/Elovl6/Ndufab1/Abhd5/Cyb5a/Hadh/Sox9/Kat2b/Etfa/Aldh3a2/Eci1/Crot/Adipor1/Slc27a1/Hadhb/Mif/Nr1h2/Nfe2l1/Gpx4/Hadha/Adh5/Echs1	44	GO_BP	up
GO:0034599	cellular response to oxidative stress	29/1210	243/28891	4.33114e-07	3.78171e-05	2.77329e-05	Fyn/Hspb1/Selenos/Atp13a2/Nr4a2/Dapk1/Ripk1/Pycr2/Mmp2/Nqo1/Rhob/Pyroxd1/Prkcd/Coq7/Net1/Arl6ip5/Chchd4/Prdx2/Nfe2l2/Stk25/Mapk3/Trp53inp1/Prdx5/Gsr/Hdac2/Atf4/Nfe2l1/Prdx1/Eif2s1	29	GO_BP	up
GO:0031668	cellular response to extracellular stimulus	31/1210	271/28891	4.50086e-07	3.78171e-05	2.77329e-05	Dapl1/Asgr1/Pdk4/Cdkn1a/Nr4a2/Fam107a/Pick1/Becn1/Sec13/Map1lc3a/Gabarapl2/Ttc5/Kat2b/Usf2/Glul/Nfe2l2/Mlx/Pim1/Mapk3/Gas6/Dsc2/Hspa5/Atf4/Rraga/Comt/Tcf7l2/Sh3glb1/Ralb/Lamp2/Csnk1a1/Eif2s1	31	GO_BP	up
GO:0007029	endoplasmic reticulum organization	17/1210	96/28891	4.58402e-07	3.78171e-05	2.77329e-05	Cav2/Sptssb/Tmem38a/Ubl4a/Emc4/Get4/Lman1/Tmed2/Zbed3/Emc8/Rab18/Emc6/Rab5if/Tor1aip2/Vapa/Emc7/Wdr83os	17	GO_BP	up
GO:0006123	mitochondrial electron transport, cytochrome c to oxygen	8/1210	19/28891	4.627e-07	3.78171e-05	2.77329e-05	Cox8b/Cox7a2/Cycs/Cox6a1/Cox5b/Cox5a/Cox4i1/Cox7c	8	GO_BP	up
GO:0006614	SRP-dependent cotranslational protein targeting to membrane	8/1210	19/28891	4.627e-07	3.78171e-05	2.77329e-05	Srprb/Srp14/Srp72/Srp68/Srpr/Sec61b/Srp19/Srp9	8	GO_BP	up
GO:0090083	regulation of inclusion body assembly	8/1210	19/28891	4.627e-07	3.78171e-05	2.77329e-05	Clu/Sncaip/Bag5/Dnajb1/Psmc6/Dnajb6/Cdc34/Psmc5	8	GO_BP	up
GO:0062197	cellular response to chemical stress	34/1210	316/28891	5.40735e-07	4.3545e-05	3.19335e-05	Aqp5/Efhd1/Fyn/Hspb1/Selenos/Atp13a2/Nr4a2/Dapk1/Ripk1/Pycr2/Mmp2/Nqo1/Rhob/Pyroxd1/Prkcd/Stk39/Coq7/Net1/Ybx3/Arl6ip5/Chchd4/Prdx2/Nfe2l2/Stk25/Mapk3/Trp53inp1/Prdx5/Gsr/Hdac2/Atf4/Nfe2l1/Xrcc5/Prdx1/Eif2s1	34	GO_BP	up
GO:0043254	regulation of protein-containing complex assembly	42/1210	437/28891	5.84155e-07	4.63599e-05	3.39977e-05	Gm14137/Cd24a/Clu/Rab3a/Capg/Cdc42ep2/Fmn1/Sgk1/Gsn/Lmo4/Hes1/Napa/Fkbp4/Vdac2/Prkcd/H3f3b/Map3k1/Dut/Vasp/Arpc5/Rhoc/Sox9/Rac1/Psmc6/Arf6/Stub1/Bax/Bin1/Nr1h2/Sar1b/Cdkn1b/Cttn/Twf1/Sh3glb1/Ralb/Capzb/Grb2/Arpc5l/Lamp2/Arpc3/Mtpn/Csnk1a1	42	GO_BP	up
GO:0072599	establishment of protein localization to endoplasmic reticulum	12/1210	49/28891	6.04859e-07	4.73173e-05	3.46998e-05	Srprb/Ubl4a/Srp14/Srp72/Srp68/Srpr/Get4/Spcs2/Sec61b/Srp19/Hspa5/Srp9	12	GO_BP	up
GO:0006367	transcription initiation at RNA polymerase II promoter	17/1210	98/28891	6.21471e-07	4.7932e-05	3.51506e-05	Med31/Polr2g/Sub1/Nfkbia/Gtf2b/Eloc/Med30/Med7/Psmc6/Nfkb1/Med28/Gtf2e2/Taf10/Med19/Gtf2a2/Polr2i/Gtf2h5	17	GO_BP	up
GO:2001242	regulation of intrinsic apoptotic signaling pathway	25/1210	194/28891	6.35996e-07	4.83711e-05	3.54726e-05	Clu/Fyn/Nupr1/Nherf1/Hspb1/Selenos/Tmbim6/Bag5/Cdkn2d/Vdac2/Becn1/Pttg1ip/Ybx3/Ubqln1/Nfe2l2/Bax/Mif/Ptpmt1/P4hb/Hdac2/Atf4/Mcl1/Sh3glb1/Bcap31/Fis1	25	GO_BP	up
GO:0045732	positive regulation of protein catabolic process	26/1210	208/28891	6.9301e-07	5.19853e-05	3.81231e-05	Il33/Clu/Cd81/Plk2/Nupr1/Nedd4l/Trib2/Lrp1/Trib1/Egln2/Ier3/Gsk3a/Ezr/Gclc/Pttg1ip/Ubqln1/Sox9/Dda1/Stub1/Rbx1/Mylip/Csnk1e/Vgll4/Oaz1/Bcap31/Csnk1a1	26	GO_BP	up
GO:0006613	cotranslational protein targeting to membrane	8/1210	20/28891	7.42785e-07	5.49661e-05	4.03091e-05	Srprb/Srp14/Srp72/Srp68/Srpr/Sec61b/Srp19/Srp9	8	GO_BP	up
GO:0044403	biological process involved in symbiotic interaction	30/1210	264/28891	7.89807e-07	5.73321e-05	4.20441e-05	Gpx2/Cav2/Cxcl1/Camp/Tmprss2/Grk2/Nectin2/Dynlt1f/Gsn/Exoc7/Zfp639/Dynlt1c/Tsg101/Chmp4c/Chmp1b/Slc3a2/Chmp5/Trim8/Snx3/Bsg/Gapdh/Rnasek/Psmc3/Thoc7/Gas6/P4hb/Vapa/Hspd1/Ly6e/Ddx39b	30	GO_BP	up
GO:0043434	response to peptide hormone	39/1210	396/28891	7.9746e-07	5.73321e-05	4.20441e-05	Gdf15/Cav2/Ptpre/Cdo1/Pdk4/Grk2/Hras/Nr4a2/Nucb2/Rab13/Sgk1/Eif2b3/Capn10/Irf1/Kbtbd2/Prkcd/Socs1/Adrm1/Gsk3a/Rbm4/Pip4k2c/Ctsd/Rac1/Zbed3/Kat2b/Prkar1a/Uso1/Nfkb1/Leprotl1/Nfe2l2/Mapk3/Eif2b2/Adipor1/Slc27a1/Snx5/Cyc1/Anxa5/Hadha/Grb2	39	GO_BP	up
GO:0032956	regulation of actin cytoskeleton organization	36/1210	351/28891	8.06167e-07	5.73321e-05	4.20441e-05	Gm14137/Rgs4/Capg/Smim22/Cdc42ep2/Hras/Rgcc/Fam107a/Fmn1/Pick1/Lrp1/Gsn/Capn10/Prkcd/Map3k1/Vasp/Arpc5/Rhoc/S100a10/Cx3cl1/Sdc4/Rac1/Actg1/Rnh1/Arf6/Bin1/Hdac2/Rala/Arf1/Cttn/Twf1/Capzb/Grb2/Arpc5l/Arpc3/Mtpn	36	GO_BP	up
GO:0032527	protein exit from endoplasmic reticulum	11/1210	42/28891	8.59974e-07	6.03746e-05	4.42753e-05	Cd81/Selenos/Tmem30b/Ufd1/Sec13/Derl1/Sec61b/Faf2/Sar1b/Bcap31/Tmem30a	11	GO_BP	up
GO:0009991	response to extracellular stimulus	43/1210	460/28891	9.06003e-07	6.28009e-05	4.60546e-05	Dapl1/Gdf15/Asgr1/Pdk4/Nppc/Cdkn1a/Nr4a2/Fam107a/Nucb2/Alad/Adrb1/Noct/Tbl1xr1/Pick1/Capn10/Zfp36/Cdkn2d/Becn1/Sec13/Stk39/Map1lc3a/Gabarapl2/Ttc5/Kat2b/Usf2/Glul/Nfe2l2/Mlx/Pim1/Mapk3/Gas6/Dsc2/Hspa5/Bax/Atf4/Rraga/Comt/Tcf7l2/Sh3glb1/Ralb/Lamp2/Csnk1a1/Eif2s1	43	GO_BP	up
GO:0048193	Golgi vesicle transport	31/1210	281/28891	9.89586e-07	6.77372e-05	4.96746e-05	Rab13/Copz2/Blzf1/Trappc6b/Krt18/Kdelr2/Rab6a/Sec13/Trappc2/Rer1/Yif1a/Ier3ip1/Lman1/Tmed2/Gabarapl2/Chic2/Cope/Trappc4/Uso1/Snx3/Trappc2l/Tmed4/P4hb/Copg1/Vapa/Sar1b/Arf1/Stx6/Bcap31/Pitpnb/Vps29	31	GO_BP	up
GO:0006888	endoplasmic reticulum to Golgi vesicle-mediated transport	19/1210	124/28891	1.00748e-06	6.81103e-05	4.99482e-05	Trappc6b/Kdelr2/Sec13/Trappc2/Yif1a/Ier3ip1/Lman1/Tmed2/Cope/Trappc4/Uso1/Trappc2l/Tmed4/P4hb/Copg1/Vapa/Sar1b/Arf1/Bcap31	19	GO_BP	up
GO:0071375	cellular response to peptide hormone stimulus	32/1210	296/28891	1.04058e-06	6.94902e-05	5.09602e-05	Gdf15/Cav2/Ptpre/Pdk4/Grk2/Hras/Nr4a2/Nucb2/Rab13/Sgk1/Capn10/Irf1/Prkcd/Socs1/Adrm1/Gsk3a/Rbm4/Pip4k2c/Ctsd/Rac1/Kat2b/Prkar1a/Uso1/Nfkb1/Leprotl1/Nfe2l2/Mapk3/Adipor1/Slc27a1/Snx5/Anxa5/Grb2	32	GO_BP	up
GO:0019693	ribose phosphate metabolic process	37/1210	373/28891	1.27704e-06	8.42536e-05	6.17868e-05	Ces1d/Pdk4/Atp1b1/Nppc/Urah/Upb1/Acot1/Vdac1/Ndufab1/Nudt3/Nudt2/Ppcs/Coasy/Sdhb/Ndufa6/Nudt18/Ak2/Crot/Ndufc2/Papss1/Gmpr/Nudt14/Ndufc1/Pdhb/Mpc1/Ndufb9/Ndufs4/Mcee/Cmpk1/Atp5pb/Ndufa12/Ndufs5/Fis1/Suclg1/Ndufa8/Ndufb8/Ndufb6	37	GO_BP	up
GO:0050821	protein stabilization	25/1210	202/28891	1.35664e-06	8.84397e-05	6.48567e-05	Clu/Atp1b1/Cct7/Bag5/Pex19/Pdcl3/Sox4/Tcf3/Zbed3/Atp1b3/Gapdh/Pim1/Pin1/Stub1/Hypk/Flot1/Ube2b/Gtpbp4/Cct2/Hspd1/Tcp1/Cct6a/Hsp90ab1/Lamp2/Cct8	25	GO_BP	up
GO:0072593	reactive oxygen species metabolic process	29/1210	257/28891	1.38414e-06	8.9171e-05	6.5393e-05	Cxcl1/Pdk4/Arg2/Duoxa1/Cdkn1a/Fyn/Aldh2/Ripk1/Nqo1/Gadd45a/Ucp2/Ier3/Prkcd/Becn1/Txnrd1/Cycs/Coq7/Vdac1/Prdx2/Cbr1/Nfe2l2/Ndufc2/Prdx5/Hbp1/Hspd1/Ndufs4/Dcxr/Prdx1/Grb2	29	GO_BP	up
GO:1990748	cellular detoxification	12/1210	53/28891	1.49818e-06	9.53957e-05	6.99578e-05	Gpx2/Aldh2/Nqo1/Prdx2/Nfe2l2/Pim1/Gsr/Akr1a1/Selenot/Esd/Prdx1/Adh5	12	GO_BP	up
GO:0034620	cellular response to unfolded protein	15/1210	83/28891	1.64563e-06	0.00010358	7.59599e-05	Stc2/Selenos/Tmbim6/Serp1/Hspb8/Dnajc3/Derl1/Tmed2/Nfe2l2/Stub1/Hspa5/Bax/Atf4/Hspd1/Eif2s1	15	GO_BP	up
GO:1903050	regulation of proteolysis involved in protein catabolic process	27/1210	232/28891	1.74694e-06	0.000108707	7.97196e-05	Il33/Clu/Plk2/Nupr1/Aqp11/Alad/Trib2/Trib1/Gipc1/Bag5/Gsk3a/Gclc/Pithd1/Psme2/Psme3ip1/Pdcl3/Gabarapl2/Ubqln1/Dda1/Stub1/Tmf1/Rbx1/Csnk1e/Nfe2l1/Bcap31/Hsp90ab1/Csnk1a1	27	GO_BP	up
GO:0009259	ribonucleotide metabolic process	36/1210	364/28891	1.89537e-06	0.000116619	8.55216e-05	Ces1d/Pdk4/Atp1b1/Nppc/Urah/Upb1/Acot1/Vdac1/Ndufab1/Nudt3/Nudt2/Ppcs/Coasy/Sdhb/Ndufa6/Nudt18/Ak2/Crot/Ndufc2/Papss1/Gmpr/Ndufc1/Pdhb/Mpc1/Ndufb9/Ndufs4/Mcee/Cmpk1/Atp5pb/Ndufa12/Ndufs5/Fis1/Suclg1/Ndufa8/Ndufb8/Ndufb6	36	GO_BP	up
GO:0032535	regulation of cellular component size	39/1210	411/28891	1.99856e-06	0.000121601	8.91754e-05	Gm14137/Crabp2/Capg/Aqp11/Pls1/Nherf1/Cdc42ep2/Atp13a2/Tnfrsf12a/Sema3f/Fmn1/Lrp1/Gsn/Akt1s1/Gdi1/Cdk5/Prkcd/Map3k1/Stk39/Ezr/Vasp/Arpc5/Ifrd1/Rac1/Snapin/Arf6/Eif2b2/Borcs8/Clns1a/Bin1/Cttn/Twf1/Rab11a/Capzb/Hsp90ab1/Grb2/Arpc5l/Arpc3/Mtpn	39	GO_BP	up
GO:0031667	response to nutrient levels	40/1210	427/28891	2.04363e-06	0.000122297	8.96859e-05	Dapl1/Gdf15/Pdk4/Nppc/Cdkn1a/Fam107a/Nucb2/Alad/Adrb1/Tbl1xr1/Pick1/Capn10/Zfp36/Cdkn2d/Becn1/Sec13/Stk39/Map1lc3a/Gabarapl2/Ttc5/Kat2b/Usf2/Glul/Nfe2l2/Mlx/Pim1/Mapk3/Gas6/Dsc2/Hspa5/Bax/Atf4/Rraga/Comt/Tcf7l2/Sh3glb1/Ralb/Lamp2/Csnk1a1/Eif2s1	40	GO_BP	up
GO:0006749	glutathione metabolic process	13/1210	64/28891	2.05466e-06	0.000122297	8.96859e-05	Gsta2/Gsta4/Gstt3/Idh1/Hagh/Gclc/Gstt2/Arl6ip5/Nfe2l2/Gsr/Nfe2l1/Gclm/Gpx4	13	GO_BP	up
GO:0007033	vacuole organization	26/1210	221/28891	2.20312e-06	0.00012873	9.4403e-05	Nupr1/Atp13a2/Tmem199/Becn1/Chmp4c/Chmp1b/Chmp5/Rnf5/Map1lc3a/Pip4k2c/Gabarapl2/Ubqln1/Rab20/Ctsd/Snapin/Hexb/Ubxn2a/Trp53inp1/Nsfl1c/Emc6/Arf1/Ift20/Atg3/Sh3glb1/Ralb/Atp6v0c	26	GO_BP	up
GO:0090257	regulation of muscle system process	29/1210	263/28891	2.20975e-06	0.00012873	9.4403e-05	Stc1/Rgs4/Trim63/Ece1/Arg2/Atp1b1/Nppc/Edn2/Fbxo32/Grk2/Tmem38a/Adrb1/Gsn/Notch1/Becn1/Gsk3a/Atp1a1/Pin1/Dsc2/Glrx3/Bin1/Calm3/Ndufs4/Cttn/Twf1/Calm1/Jup/Mtpn/Ddx39b	29	GO_BP	up
GO:0035265	organ growth	26/1210	222/28891	2.39765e-06	0.000138045	0.000101234	Stc1/Rarb/Rgs4/Nppc/Sorbs2/Fgf1/Adrb1/Ccnd2/Rara/Notch1/Cited2/Serp1/Gsk3a/Ier3ip1/Ybx3/Sox9/Il7/Prkar1a/Pim1/Pin1/Zmpste24/Hdac2/Vgll4/Tcf7l2/Ly6e/Ddx39b	26	GO_BP	up
GO:0010257	NADH dehydrogenase complex assembly	13/1210	65/28891	2.47049e-06	0.000138045	0.000101234	Ndufaf6/Ndufaf3/Ndufab1/Ndufa6/Ndufc2/Ndufc1/Ndufb9/Ndufs4/Ndufa12/Ndufs5/Ndufa8/Ndufb8/Ndufb6	13	GO_BP	up
GO:0032981	mitochondrial respiratory chain complex I assembly	13/1210	65/28891	2.47049e-06	0.000138045	0.000101234	Ndufaf6/Ndufaf3/Ndufab1/Ndufa6/Ndufc2/Ndufc1/Ndufb9/Ndufs4/Ndufa12/Ndufs5/Ndufa8/Ndufb8/Ndufb6	13	GO_BP	up
GO:0042776	proton motive force-driven mitochondrial ATP synthesis	13/1210	65/28891	2.47049e-06	0.000138045	0.000101234	Ndufab1/Sdhb/Ndufa6/Ndufc2/Ndufc1/Ndufb9/Ndufs4/Atp5pb/Ndufa12/Ndufs5/Ndufa8/Ndufb8/Ndufb6	13	GO_BP	up
GO:0008637	apoptotic mitochondrial changes	18/1210	120/28891	2.63699e-06	0.00014586	0.000106966	Cd24a/Sfn/Mllt11/Vdac2/Ier3/Map3k1/Gsk3a/Gclc/Bax/Slc25a5/Hspd1/Ghitm/Mcl1/Gclm/Atg3/Sh3glb1/Fis1/Rnf7	18	GO_BP	up
GO:0009260	ribonucleotide biosynthetic process	25/1210	210/28891	2.76827e-06	0.000150089	0.000110067	Pdk4/Nppc/Vdac1/Ndufab1/Nudt2/Ppcs/Coasy/Sdhb/Ndufa6/Ak2/Ndufc2/Papss1/Gmpr/Ndufc1/Pdhb/Mpc1/Ndufb9/Ndufs4/Cmpk1/Atp5pb/Ndufa12/Ndufs5/Ndufa8/Ndufb8/Ndufb6	25	GO_BP	up
GO:0043524	negative regulation of neuron apoptotic process	25/1210	210/28891	2.76827e-06	0.000150089	0.000110067	Sncb/Clu/Nppc/Fyn/Hras/Foxq1/Nr4a2/Cebpb/Six1/Lrp1/Mdk/Ucp2/Btg2/Gclc/Cx3cl1/Prdx2/Tmbim4/Pin1/Bax/Atf4/Hspd1/Gclm/Nfix/Hsp90ab1/Set	25	GO_BP	up
GO:0008380	RNA splicing	41/1210	449/28891	2.9043e-06	0.000155921	0.000114344	Celf4/Prpf19/Lsm8/Snrpa1/Rbm20/Ildr1/Tmbim6/Lsm3/Zcrb1/Snrnp27/Malat1/Pcbp4/Rbm4/Dnajc17/Kat2b/Sf3b6/Rps26/U2af1l4/Prmt1/Scnm1/Srsf10/Hnrnpl/Thoc7/Clns1a/Wbp4/Taf10/Cwc15/Rbm7/Mbnl2/Syf2/Srsf9/Hnrnph3/Lsm1/Puf60/Snrpc/Snrpa/Cript/Rbm47/Ddx39b/Eny2/Snrpd3	41	GO_BP	up
GO:0009306	protein secretion	40/1210	434/28891	3.04829e-06	0.000162063	0.000118848	Kcnj6/Gnao1/Rab3a/Rapgef4/Pim3/Atp13a2/Rab13/Pick1/Lrp1/Capn10/Osbp/Serp1/Ucp2/Ier3ip1/Rbm4/Tmed2/Sox4/Hadh/Rac1/Frmd4a/Prkar1a/Idh2/Bsg/Glul/Arf6/Hmgn3/Ccdc186/Kif5b/Tmem167/Gna11/Ptpmt1/Copg1/Nr1h2/Arf1/Anxa5/Tcf7l2/Selenot/Dynll1/Ube2q1/Eny2	40	GO_BP	up
GO:0009152	purine ribonucleotide biosynthetic process	24/1210	198/28891	3.16982e-06	0.000166903	0.000122397	Pdk4/Nppc/Vdac1/Ndufab1/Nudt2/Ppcs/Coasy/Sdhb/Ndufa6/Ak2/Ndufc2/Papss1/Gmpr/Ndufc1/Pdhb/Mpc1/Ndufb9/Ndufs4/Atp5pb/Ndufa12/Ndufs5/Ndufa8/Ndufb8/Ndufb6	24	GO_BP	up
GO:0035592	establishment of protein localization to extracellular region	40/1210	435/28891	3.22446e-06	0.000168163	0.000123321	Kcnj6/Gnao1/Rab3a/Rapgef4/Pim3/Atp13a2/Rab13/Pick1/Lrp1/Capn10/Osbp/Serp1/Ucp2/Ier3ip1/Rbm4/Tmed2/Sox4/Hadh/Rac1/Frmd4a/Prkar1a/Idh2/Bsg/Glul/Arf6/Hmgn3/Ccdc186/Kif5b/Tmem167/Gna11/Ptpmt1/Copg1/Nr1h2/Arf1/Anxa5/Tcf7l2/Selenot/Dynll1/Ube2q1/Eny2	40	GO_BP	up
GO:0048638	regulation of developmental growth	38/1210	405/28891	3.51424e-06	0.00017985	0.000131892	Gdf15/Crabp2/Rgs4/Nppc/Cdkn1a/Foxs1/Pls1/Stc2/Nedd4l/Atp8a2/Tnfrsf12a/Adrb1/Sema3f/Six1/Ccnd2/Lrp1/Notch1/Cited2/Serp1/Gdi1/Cdk5/Gsk3a/Ezr/Ybx3/Ifrd1/Il7/Pim1/Pin1/Eif2b2/Zmpste24/Hdac2/Cdkn1b/Spr/Cttn/Vgll4/Tcf7l2/Sh3glb1/Ddx39b	38	GO_BP	up
GO:0051098	regulation of binding	38/1210	405/28891	3.51424e-06	0.00017985	0.000131892	Grem2/Cdkn1a/Plk2/Hey1/Hmgb2/Lrp1/Ubash3b/Tmbim6/Rara/Hes1/Ppp1r2/Pex19/Cdk5/Cycs/Derl1/Gtf2b/Psme3ip1/Tmed2/S100a10/1810037I17Rik/Snapin/Kat2b/Pin1/Stub1/Mapk3/Flot1/Bax/Zmpste24/Taf10/Gtpbp4/Hdac2/Tcf7l2/Calm1/Ralb/Hsp90ab1/Edf1/Csnk1a1/Eif2s1	38	GO_BP	up
GO:0006352	DNA-templated transcription initiation	19/1210	135/28891	3.71209e-06	0.000188217	0.000138028	Med31/Cebpa/Polr2g/Sub1/Nfkbia/Gtf2b/Eloc/Med30/Med7/Psmc6/Nfkb1/Polr3h/Med28/Gtf2e2/Taf10/Med19/Gtf2a2/Polr2i/Gtf2h5	19	GO_BP	up
GO:0009150	purine ribonucleotide metabolic process	34/1210	345/28891	3.91594e-06	0.000196731	0.000144272	Ces1d/Pdk4/Atp1b1/Nppc/Urah/Acot1/Vdac1/Ndufab1/Nudt3/Nudt2/Ppcs/Coasy/Sdhb/Ndufa6/Nudt18/Ak2/Crot/Ndufc2/Papss1/Gmpr/Ndufc1/Pdhb/Mpc1/Ndufb9/Ndufs4/Mcee/Atp5pb/Ndufa12/Ndufs5/Fis1/Suclg1/Ndufa8/Ndufb8/Ndufb6	34	GO_BP	up
GO:0008631	intrinsic apoptotic signaling pathway in response to oxidative stress	12/1210	58/28891	4.12809e-06	0.000205504	0.000150705	Fyn/Hspb1/Aldh2/Bag5/Ubqln1/Arl6ip5/Nfe2l2/Stk25/P4hb/Atf4/Mcl1/Rnf7	12	GO_BP	up
GO:1902903	regulation of supramolecular fiber organization	37/1210	393/28891	4.34685e-06	0.000214444	0.000157261	Gm14137/Rgs4/Clu/Capg/Cdc42ep2/Rgcc/Pfdn4/Fmn1/Sgk1/Pick1/Gsn/Cib1/Fkbp4/Prkcd/Map3k1/Vasp/Arpc5/Rhoc/S100a10/Cx3cl1/Sdc4/Rac1/Actg1/Rnh1/Arf6/Pfdn2/Bin1/Hdac2/Cdkn1b/Arf1/Cttn/Twf1/Capzb/Grb2/Arpc5l/Arpc3/Mtpn	37	GO_BP	up
GO:0071692	protein localization to extracellular region	40/1210	441/28891	4.49541e-06	0.000219793	0.000161184	Kcnj6/Gnao1/Rab3a/Rapgef4/Pim3/Atp13a2/Rab13/Pick1/Lrp1/Capn10/Osbp/Serp1/Ucp2/Ier3ip1/Rbm4/Tmed2/Sox4/Hadh/Rac1/Frmd4a/Prkar1a/Idh2/Bsg/Glul/Arf6/Hmgn3/Ccdc186/Kif5b/Tmem167/Gna11/Ptpmt1/Copg1/Nr1h2/Arf1/Anxa5/Tcf7l2/Selenot/Dynll1/Ube2q1/Eny2	40	GO_BP	up
GO:0034765	regulation of monoatomic ion transmembrane transport	43/1210	490/28891	4.64722e-06	0.000225205	0.000165153	Kcnj6/Rgs4/Atp1b1/Dpp10/Rgs9/Fyn/Prss8/Nherf1/Nedd4l/Tmem38a/Stac/Cxcl10/Adrb1/Ripk1/Pick1/Ubash3b/Tmbim6/Cox17/Fxyd3/Scn1b/Tmem109/Gnb2/Cdk5/Stk39/Kcnh1/Vdac1/S100a1/Stim2/Cx3cl1/Ubqln1/1810037I17Rik/Clic4/Atp1b3/Kif5b/Ppp3r1/Bax/Bin1/Calm3/Arf1/Snx27/Calm1/Iscu/Fkbp1a	43	GO_BP	up
GO:0090316	positive regulation of intracellular protein transport	20/1210	150/28891	4.84427e-06	0.000232695	0.000170645	Sfn/Fyn/Cd81/Hras/Tmem30b/Cib1/Cdk5/Prkcd/Gsk3a/Kif5b/Gas6/Sar1b/Sh3glb1/Oaz1/Bcap31/Jup/Fis1/Hsp90ab1/Tmem30a/Anp32b	20	GO_BP	up
GO:1990542	mitochondrial transmembrane transport	12/1210	59/28891	4.98577e-06	0.00023741	0.000174103	Sfxn5/Timm17a/Maip1/Tomm40/Ucp2/Slc25a37/Vdac1/Mrpl18/Pam16/Tomm20/Sfxn1/Grpel1	12	GO_BP	up
GO:1905477	positive regulation of protein localization to membrane	17/1210	114/28891	5.382e-06	0.000249544	0.000183002	Dpp10/Fyn/Cd81/Pls1/Hras/Stac/Lrp1/Cib1/Cdk5/Ezr/Rer1/Arf6/Kif5b/Snx27/Sh3glb1/Rab11a/Fis1	17	GO_BP	up
GO:0006081	cellular aldehyde metabolic process	14/1210	80/28891	5.38991e-06	0.000249544	0.000183002	Aldh1a3/Aldh2/Tkt/Idh1/Mdh2/Hagh/Idh2/Aldh3a2/Gapdh/Taldo1/Pnkd/Akr1a1/Esd/Adh5	14	GO_BP	up
GO:0010611	regulation of cardiac muscle hypertrophy	14/1210	80/28891	5.38991e-06	0.000249544	0.000183002	Rgs4/Trim63/Ece1/Fbxo32/Adrb1/Gsn/Notch1/Becn1/Gsk3a/Pin1/Glrx3/Twf1/Mtpn/Ddx39b	14	GO_BP	up
GO:0046390	ribose phosphate biosynthetic process	25/1210	218/28891	5.4229e-06	0.000249544	0.000183002	Pdk4/Nppc/Vdac1/Ndufab1/Nudt2/Ppcs/Coasy/Sdhb/Ndufa6/Ak2/Ndufc2/Papss1/Gmpr/Ndufc1/Pdhb/Mpc1/Ndufb9/Ndufs4/Cmpk1/Atp5pb/Ndufa12/Ndufs5/Ndufa8/Ndufb8/Ndufb6	25	GO_BP	up
GO:0006739	NADP metabolic process	11/1210	50/28891	5.51823e-06	0.000251815	0.000184667	Noct/Tkt/Idh1/Nqo1/Fdx1/Txnrd1/Idh2/Taldo1/Prdx5/Pgls/Dcxr	11	GO_BP	up
GO:0015986	proton motive force-driven ATP synthesis	13/1210	70/28891	5.88139e-06	0.000266169	0.000195194	Ndufab1/Sdhb/Ndufa6/Ndufc2/Ndufc1/Ndufb9/Ndufs4/Atp5pb/Ndufa12/Ndufs5/Ndufa8/Ndufb8/Ndufb6	13	GO_BP	up
GO:0007034	vacuolar transport	21/1210	165/28891	5.96666e-06	0.000266953	0.000195768	Clu/Atp13a2/Vps36/Lrp1/Rhob/Vta1/Tsg101/Becn1/Chmp4c/Chmp1b/Plekhf2/Chmp5/Snapin/Leprotl1/Stx7/Bin1/Hgsnat/Arf1/Snx27/Lamp2/Vps29	21	GO_BP	up
GO:0097237	cellular response to toxic substance	12/1210	60/28891	5.99621e-06	0.000266953	0.000195768	Gpx2/Aldh2/Nqo1/Prdx2/Nfe2l2/Pim1/Gsr/Akr1a1/Selenot/Esd/Prdx1/Adh5	12	GO_BP	up
GO:0032388	positive regulation of intracellular transport	23/1210	192/28891	6.15442e-06	0.000271787	0.000199313	Sfn/Fyn/Cd81/Hras/Tmem30b/Cib1/Capn10/Cdk5/Prkcd/Gsk3a/Ezr/Kif5b/Gas6/Sar1b/Arf1/Sh3glb1/Oaz1/Bcap31/Jup/Fis1/Hsp90ab1/Tmem30a/Anp32b	23	GO_BP	up
GO:0098754	detoxification	13/1210	71/28891	6.92574e-06	0.000303403	0.000222499	Gpx2/Aldh2/Nqo1/Prdx2/Nfe2l2/Pim1/Ralbp1/Gsr/Akr1a1/Selenot/Esd/Prdx1/Adh5	13	GO_BP	up
GO:0006122	mitochondrial electron transport, ubiquinol to cytochrome c	6/1210	13/28891	7.09804e-06	0.000306054	0.000224443	Cycs/Uqcrc2/Uqcrfs1/Cyc1/Uqcrb/Uqcrh	6	GO_BP	up
GO:0048102	autophagic cell death	6/1210	13/28891	7.09804e-06	0.000306054	0.000224443	Dapk1/Cdkn2d/Trp53inp1/Cdkn1b/Sh3glb1/Atp6v0c	6	GO_BP	up
GO:0140694	non-membrane-bounded organelle assembly	37/1210	402/28891	7.28427e-06	0.00031163	0.000228532	Krt19/Plk2/Smim22/Pls1/Nebl/Racgap1/Noct/Gsn/Lsm3/Neurl2/Brix1/Chmp4c/Chmp1b/Ezr/Chmp5/Gtf2b/Krt8/Sqle/Tubb5/Mrto4/Kat2b/Prkar1a/Actg1/Rrs1/Cds1/Mrpl20/Eif5/Mzt1/Rps27l/Hdac2/Cnot6/Xrcc5/Rplp0/Rab11a/Sugt1/Mrps7/Eif2s1	37	GO_BP	up
GO:0110053	regulation of actin filament organization	29/1210	280/28891	7.61097e-06	0.000323083	0.000236931	Gm14137/Rgs4/Capg/Cdc42ep2/Rgcc/Fmn1/Pick1/Gsn/Prkcd/Map3k1/Vasp/Arpc5/Rhoc/S100a10/Cx3cl1/Sdc4/Rac1/Actg1/Rnh1/Arf6/Bin1/Arf1/Cttn/Twf1/Capzb/Grb2/Arpc5l/Arpc3/Mtpn	29	GO_BP	up
GO:2000377	regulation of reactive oxygen species metabolic process	21/1210	168/28891	7.92823e-06	0.000333961	0.000244908	Cxcl1/Arg2/Duoxa1/Cdkn1a/Fyn/Aldh2/Ripk1/Gadd45a/Ier3/Prkcd/Becn1/Coq7/Vdac1/Prdx2/Cbr1/Nfe2l2/Ndufc2/Hbp1/Hspd1/Dcxr/Grb2	21	GO_BP	up
GO:0042692	muscle cell differentiation	41/1210	468/28891	7.99612e-06	0.00033425	0.00024512	Irx3/Gdf15/Cav2/Rarb/Rgs4/Sorbs2/Cd81/Krt19/Prdm6/Nebl/Hey1/Cd9/Cxcl10/Adrb1/Six1/Klf5/Ccnd2/Rara/Notch1/Hes1/Neurl2/H3f3b/Gsk3a/Lamb1/Krt8/Rbm4/Ifrd1/Sox9/Prkar1a/Actg1/Med28/Pdcd4/Pin1/H3f3a/Flot1/Bin1/Zmpste24/Hdac2/Ift20/Akirin2/Ddx39b	41	GO_BP	up
GO:2000146	negative regulation of cell motility	32/1210	326/28891	8.09017e-06	0.00033562	0.000246124	Stc1/Il33/Mctp1/Dcn/Nherf1/Rgcc/Jag1/Cygb/Lrp1/Trib1/Notch1/Cers2/Gadd45a/Rhob/Cited2/Ing1/Sinhcaf/Cx3cl1/Rac1/Clic4/Idh2/Csnk2b/Nfe2l2/Suds3/Abhd6/Pin1/Adipor1/Trp53inp1/Mif/Gtpbp4/Hdac2/Jup	32	GO_BP	up
GO:0014743	regulation of muscle hypertrophy	14/1210	83/28891	8.40981e-06	0.000343673	0.00025203	Rgs4/Trim63/Ece1/Fbxo32/Adrb1/Gsn/Notch1/Becn1/Gsk3a/Pin1/Glrx3/Twf1/Mtpn/Ddx39b	14	GO_BP	up
GO:0030433	ubiquitin-dependent ERAD pathway	14/1210	83/28891	8.40981e-06	0.000343673	0.00025203	Selenos/Ufd1/Jkamp/Derl1/Rnf5/Sec61b/Ubqln1/Hsp90b1/Psmc6/Stub1/Fbxo6/Hspa5/Faf2/Bcap31	14	GO_BP	up
GO:0040013	negative regulation of locomotion	34/1210	358/28891	8.70362e-06	0.000351598	0.000257842	Stc1/Il33/Mctp1/Dcn/Nherf1/Rgcc/Jag1/Cygb/Sema3f/Lrp1/Trib1/Arrdc3/Notch1/Cers2/Gadd45a/Rhob/Cited2/Ing1/Sinhcaf/Cx3cl1/Rac1/Clic4/Idh2/Csnk2b/Nfe2l2/Suds3/Abhd6/Pin1/Adipor1/Trp53inp1/Mif/Gtpbp4/Hdac2/Jup	34	GO_BP	up
GO:0051258	protein polymerization	29/1210	282/28891	8.73217e-06	0.000351598	0.000257842	Gm14137/Capg/Krt5/Cdc42ep2/Fam107a/Fmn1/Sgk1/Gsn/Fkbp4/Tuba1a/Vdac2/Prkcd/Nin/Map3k1/Vasp/Arpc5/Rac1/Arf6/Bin1/Mzt1/Cdkn1b/Cttn/Gpx4/Twf1/Capzb/Grb2/Arpc5l/Arpc3/Mtpn	29	GO_BP	up
GO:0071826	protein-RNA complex organization	22/1210	183/28891	9.17773e-06	0.000366841	0.000269021	Celf4/Prpf19/Brix1/Eif2s2/Dnajc17/Mrto4/Rrs1/Kif5b/Mrpl20/Srsf10/Eif5/Clns1a/Rps27l/Ramac/Xrcc5/Ruvbl1/Rplp0/Puf60/Snrpc/Mrps7/Ddx39b/Snrpd3	22	GO_BP	up
GO:0030336	negative regulation of cell migration	31/1210	313/28891	9.31281e-06	0.000369543	0.000271002	Stc1/Il33/Mctp1/Dcn/Nherf1/Rgcc/Jag1/Cygb/Lrp1/Trib1/Notch1/Cers2/Gadd45a/Rhob/Cited2/Ing1/Sinhcaf/Cx3cl1/Rac1/Clic4/Idh2/Csnk2b/Nfe2l2/Suds3/Abhd6/Adipor1/Trp53inp1/Mif/Gtpbp4/Hdac2/Jup	31	GO_BP	up
GO:0009267	cellular response to starvation	22/1210	184/28891	1.00185e-05	0.000394034	0.000288962	Dapl1/Pdk4/Cdkn1a/Pick1/Becn1/Map1lc3a/Gabarapl2/Ttc5/Glul/Nfe2l2/Mapk3/Gas6/Dsc2/Hspa5/Atf4/Rraga/Comt/Tcf7l2/Sh3glb1/Ralb/Lamp2/Eif2s1	22	GO_BP	up
GO:0070841	inclusion body assembly	8/1210	27/28891	1.00739e-05	0.000394034	0.000288962	Clu/Sncaip/Bag5/Dnajb1/Psmc6/Dnajb6/Cdc34/Psmc5	8	GO_BP	up
GO:0061025	membrane fusion	21/1210	171/28891	1.04553e-05	0.00040605	0.000297774	Cav2/Rab3a/Nectin2/Atp13a2/Cd9/Rab13/Tpst2/Chmp4c/Chmp1b/Chmp5/Rab20/Snapin/Uso1/Stx7/Kif5b/Ubxn2a/Gas6/Stx11/Nsfl1c/Snap47/Stx6	21	GO_BP	up
GO:0031396	regulation of protein ubiquitination	24/1210	213/28891	1.11936e-05	0.000431662	0.000316556	Fyn/Fam107a/Trib2/Trib1/Arrdc3/Bag5/Cdk5/Gsk3a/Aimp2/Gclc/Derl1/Pttg1ip/Ubqln1/Sox4/Skp1/Pin1/Stub1/Rbx1/Ubxn2a/Hspa5/Bex3/Gtpbp4/Ube2n/Ube2l3	24	GO_BP	up
GO:0030833	regulation of actin filament polymerization	19/1210	146/28891	1.18245e-05	0.000452804	0.000332061	Gm14137/Capg/Cdc42ep2/Fmn1/Gsn/Prkcd/Map3k1/Vasp/Arpc5/Rac1/Arf6/Bin1/Cttn/Twf1/Capzb/Grb2/Arpc5l/Arpc3/Mtpn	19	GO_BP	up
GO:0051205	protein insertion into membrane	12/1210	64/28891	1.20604e-05	0.000458631	0.000336334	Maip1/Tomm40/Ubl4a/Emc4/Get4/Emc8/Bax/Emc6/Rab5if/Emc7/Sh3glb1/Wdr83os	12	GO_BP	up
GO:0036503	ERAD pathway	16/1210	109/28891	1.23856e-05	0.00046775	0.000343021	Aqp11/Selenos/Ufd1/Jkamp/Get4/Derl1/Rnf5/Sec61b/Ubqln1/Hsp90b1/Psmc6/Stub1/Fbxo6/Hspa5/Faf2/Bcap31	16	GO_BP	up
GO:0007264	small GTPase mediated signal transduction	38/1210	428/28891	1.25516e-05	0.00047077	0.000345236	Gm14137/Rhov/Kctd13/Plk2/Rapgef4/Cdc42ep2/Hras/Rhou/Arhgap24/Nucb2/Dynlt1f/Adrb1/Plcd4/Racgap1/Cyth2/Notch1/Ssx2ip/Rhob/Rab4b/Gdi1/Dynlt1c/Rtkn/Rhoc/Rab15/Nkiras1/Net1/Rac1/Uso1/Arf6/Ralbp1/Timp2/Flot1/Nras/Rala/Ralb/Nfix/Grb2/Gdi2	38	GO_BP	up
GO:1905037	autophagosome organization	17/1210	122/28891	1.35721e-05	0.0005027	0.000368652	Nupr1/Atp13a2/Becn1/Rnf5/Map1lc3a/Pip4k2c/Gabarapl2/Ubqln1/Ctsd/Ubxn2a/Trp53inp1/Nsfl1c/Emc6/Ift20/Atg3/Sh3glb1/Ralb	17	GO_BP	up
GO:0045048	protein insertion into ER membrane	8/1210	28/28891	1.35865e-05	0.0005027	0.000368652	Ubl4a/Emc4/Get4/Emc8/Emc6/Rab5if/Emc7/Wdr83os	8	GO_BP	up
GO:0051443	positive regulation of ubiquitin-protein transferase activity	7/1210	21/28891	1.54024e-05	0.000564623	0.000414062	Trib2/Trib1/Arrdc3/Skp1/Pin1/Stub1/Ube2l3	7	GO_BP	up
GO:0042886	amide transport	38/1210	432/28891	1.54663e-05	0.000564623	0.000414062	Kcnj6/Gnao1/Aqp3/Rab3a/Rapgef4/Pim3/Nucb2/Ildr1/Pick1/Lrp1/Gipc1/Capn10/Osbp/Serp1/Slc1a4/Ucp2/Gltp/Rbm4/Sox4/Hadh/Rac1/Prkar1a/Arl6ip5/Glul/Hmgn3/Ccdc186/Kif5b/Slc27a1/Gna11/Ptpmt1/Pltp/Vapa/Anxa5/Tcf7l2/Selenot/Dynll1/Ube2q1/Eny2	38	GO_BP	up
GO:0072655	establishment of protein localization to mitochondrion	15/1210	99/28891	1.55825e-05	0.000565097	0.00041441	Timm17a/Maip1/Pmpcb/Tomm40/Gsk3a/Pam16/Tomm20/Chchd4/Bax/Rala/Hspd1/Grpel1/Sh3glb1/Bcap31/Fis1	15	GO_BP	up
GO:0010001	glial cell differentiation	29/1210	292/28891	1.69534e-05	0.000610223	0.000447503	Il33/Clu/Grk2/Serpine2/Nkx6-2/Hras/Prpf19/Nab2/Pick1/Lrp1/Mdk/Notch1/Hes1/Eif2b3/Eed/Tuba1a/Cdk5/Sox4/Sox9/Slc25a46/Mapk3/Eif2b2/Ppp3r1/Bin1/Hdac2/Nfe2l1/Tcf7l2/Nfix/Grb2	29	GO_BP	up
GO:1904019	epithelial cell apoptotic process	20/1210	163/28891	1.70497e-05	0.000610223	0.000447503	Nupr1/Rgcc/Pak4/Mdk/Gsn/Capn10/Zfp36/Krt18/Casp8/Krt8/Nfe2l2/Arf6/Pdcd4/Tmf1/Gas6/Bax/Col18a1/Cdkn1b/Tcf7l2/Eif2s1	20	GO_BP	up
GO:0006164	purine nucleotide biosynthetic process	25/1210	233/28891	1.73242e-05	0.000616022	0.000451756	Pdk4/Nppc/Vdac1/Ndufab1/Nudt2/Ppcs/Coasy/Idh2/Sdhb/Ndufa6/Ak2/Ndufc2/Papss1/Gmpr/Ndufc1/Pdhb/Mpc1/Ndufb9/Ndufs4/Atp5pb/Ndufa12/Ndufs5/Ndufa8/Ndufb8/Ndufb6	25	GO_BP	up
GO:0009266	response to temperature stimulus	20/1210	164/28891	1.86652e-05	0.000659424	0.000483585	Ces1d/Tcim/Hspb1/Stac/Fgf1/Adrb1/Eif2b3/Ucp2/Dnajb1/Gclc/Dnajc3/Pdcl3/Stub1/Eif2b2/Trp53inp1/Dnaja2/Slc27a1/Nfe2l1/Hsp90ab1/Eif2s1	20	GO_BP	up
GO:1903320	regulation of protein modification by small protein conjugation or removal	26/1210	249/28891	1.9154e-05	0.000672353	0.000493066	Fyn/Fam107a/Trib2/Trib1/Arrdc3/Bag5/Cdk5/Gsk3a/Aimp2/Gclc/Derl1/Pttg1ip/Ubqln1/Sox4/Skp1/Pin1/Stub1/Rbx1/Ubxn2a/Hspa5/Bex3/Gtpbp4/Ube2i/Ube2n/Ube2l3/Hmg20b	26	GO_BP	up
GO:0032271	regulation of protein polymerization	23/1210	206/28891	1.96191e-05	0.000684295	0.000501824	Gm14137/Capg/Cdc42ep2/Fmn1/Sgk1/Gsn/Fkbp4/Vdac2/Prkcd/Map3k1/Vasp/Arpc5/Rac1/Arf6/Bin1/Cdkn1b/Cttn/Twf1/Capzb/Grb2/Arpc5l/Arpc3/Mtpn	23	GO_BP	up
GO:1901873	regulation of post-translational protein modification	29/1210	295/28891	2.05342e-05	0.000711679	0.000521905	Fyn/Fam107a/Trib2/Trib1/Arrdc3/Bag5/Eed/Cdk5/Gsk3a/Aimp2/Gclc/Kat8/Derl1/Pttg1ip/Ubqln1/Sox4/Skp1/Pin1/Stub1/Rbx1/Ubxn2a/Hspa5/Bex3/Ube2b/Gtpbp4/Ube2i/Ube2n/Ube2l3/Hmg20b	29	GO_BP	up
GO:0034440	lipid oxidation	17/1210	126/28891	2.08693e-05	0.000718743	0.000527086	Bdh2/Pla2g7/Pdk4/Nucb2/Cygb/Auh/Slc25a17/Hadh/Sox9/Etfa/Eci1/Crot/Adipor1/Hadhb/Hadha/Adh5/Echs1	17	GO_BP	up
GO:1903532	positive regulation of secretion by cell	35/1210	390/28891	2.17503e-05	0.000744116	0.000545692	Rab3a/Nppc/Edn2/Grk2/Rapgef4/Atp13a2/Rgcc/Nucb2/Ildr1/Lrp1/Capn10/Osbp/Serp1/Cdk5/Tsg101/Ier3ip1/Rab15/S100a10/Sox4/Sdc4/Rac1/Frmd4a/Prkar1a/Bsg/Glul/Arf6/Tmf1/Kif5b/Gna11/Mif/Nr1h2/Arf1/Tcf7l2/Selenot/Dynll1	35	GO_BP	up
GO:0009408	response to heat	14/1210	90/28891	2.18897e-05	0.000744116	0.000545692	Tcim/Hspb1/Stac/Fgf1/Eif2b3/Dnajb1/Gclc/Pdcl3/Stub1/Eif2b2/Trp53inp1/Dnaja2/Hsp90ab1/Eif2s1	14	GO_BP	up
GO:0000045	autophagosome assembly	16/1210	114/28891	2.20136e-05	0.000744116	0.000545692	Nupr1/Becn1/Rnf5/Map1lc3a/Pip4k2c/Gabarapl2/Ubqln1/Ctsd/Ubxn2a/Trp53inp1/Nsfl1c/Emc6/Ift20/Atg3/Sh3glb1/Ralb	16	GO_BP	up
GO:0002028	regulation of sodium ion transport	15/1210	102/28891	2.24533e-05	0.000754321	0.000553176	Cxcl1/Atp1b1/Serpine2/Prss8/Nherf1/Nedd4l/Sgk1/Pick1/Fxyd3/Scn1b/Stk39/Atp1a1/Atp1b3/Kif5b/Arf1	15	GO_BP	up
GO:0022613	ribonucleoprotein complex biogenesis	38/1210	440/28891	2.32371e-05	0.000775891	0.000568995	Celf4/Prpf19/Isg20/Pop7/Brix1/Tsr3/Eif2s2/Mrto4/Gnl2/Kat2b/Lyar/Rrs1/Glul/Utp11/Mrpl20/Rrp1/Srsf10/Eif5/Clns1a/Gtpbp4/Pa2g4/Rps27l/Pak1ip1/Rps19bp1/Ramac/Xrcc5/Fcf1/Ruvbl1/Rplp0/Puf60/Snrpc/Rps11/Imp3/Ebna1bp2/Mrps7/Ddx39b/Gtf2h5/Snrpd3	38	GO_BP	up
GO:0003015	heart process	26/1210	252/28891	2.35943e-05	0.000783045	0.000574241	Stc1/Irx3/Gnao1/Rgs4/Atp1b1/Edn2/Fyn/Grk2/Nedd4l/Tmem38a/Adrb1/Gsn/Scn1b/Gsk3a/S100a1/Ppcs/Rac1/Atp1a1/Dsc2/Glrx3/Bin1/Zmpste24/Calm3/Calm1/Pebp1/Jup	26	GO_BP	up
GO:0009165	nucleotide biosynthetic process	27/1210	267/28891	2.37428e-05	0.000783226	0.000574374	Pdk4/Nppc/Dut/Vdac1/Ndufab1/Nudt2/Ppcs/Coasy/Idh2/Sdhb/Ndufa6/Ak2/Ndufc2/Papss1/Gmpr/Ndufc1/Pdhb/Mpc1/Ndufb9/Ndufs4/Cmpk1/Atp5pb/Ndufa12/Ndufs5/Ndufa8/Ndufb8/Ndufb6	27	GO_BP	up
GO:0042594	response to starvation	23/1210	209/28891	2.47529e-05	0.000806285	0.000591284	Dapl1/Pdk4/Cdkn1a/Pick1/Zfp36/Becn1/Map1lc3a/Gabarapl2/Ttc5/Glul/Nfe2l2/Mapk3/Gas6/Dsc2/Hspa5/Atf4/Rraga/Comt/Tcf7l2/Sh3glb1/Ralb/Lamp2/Eif2s1	23	GO_BP	up
GO:0006790	sulfur compound metabolic process	29/1210	298/28891	2.47897e-05	0.000806285	0.000591284	Ces1d/Hs3st6/Cdo1/Pdk4/Acot1/Tpst2/Ugdh/Ciao2b/Gclc/Vdac1/Ndufab1/Slc35b2/Ppcs/Hexb/Pcmt1/Papss1/Glrx3/Pdhb/Mpc1/Hgsnat/Isca2/Mcee/Comt/Gclm/Pdzd11/Tcf7l2/Mat2b/Iscu/Suclg1	29	GO_BP	up
GO:0032436	positive regulation of proteasomal ubiquitin-dependent protein catabolic process	14/1210	91/28891	2.48835e-05	0.000806285	0.000591284	Il33/Clu/Plk2/Trib2/Trib1/Gsk3a/Gclc/Ubqln1/Dda1/Stub1/Rbx1/Csnk1e/Bcap31/Csnk1a1	14	GO_BP	up
GO:0044409	entry into host	15/1210	103/28891	2.52752e-05	0.000814159	0.000597058	Cav2/Tmprss2/Grk2/Nectin2/Gsn/Exoc7/Zfp639/Slc3a2/Trim8/Snx3/Bsg/Rnasek/Gas6/P4hb/Ly6e	15	GO_BP	up
GO:0007041	lysosomal transport	17/1210	128/28891	2.56874e-05	0.000822596	0.000603246	Clu/Atp13a2/Lrp1/Rhob/Tsg101/Becn1/Chmp4c/Chmp1b/Plekhf2/Chmp5/Snapin/Stx7/Bin1/Hgsnat/Arf1/Snx27/Lamp2	17	GO_BP	up
GO:1904851	positive regulation of establishment of protein localization to telomere	5/1210	10/28891	2.70021e-05	0.000857743	0.000629021	Cct7/Cct2/Tcp1/Cct6a/Cct8	5	GO_BP	up
GO:1901293	nucleoside phosphate biosynthetic process	27/1210	269/28891	2.70982e-05	0.000857743	0.000629021	Pdk4/Nppc/Dut/Vdac1/Ndufab1/Nudt2/Ppcs/Coasy/Idh2/Sdhb/Ndufa6/Ak2/Ndufc2/Papss1/Gmpr/Ndufc1/Pdhb/Mpc1/Ndufb9/Ndufs4/Cmpk1/Atp5pb/Ndufa12/Ndufs5/Ndufa8/Ndufb8/Ndufb6	27	GO_BP	up
GO:0050708	regulation of protein secretion	31/1210	331/28891	2.79456e-05	0.000877902	0.000643804	Kcnj6/Gnao1/Rapgef4/Pim3/Atp13a2/Pick1/Lrp1/Capn10/Osbp/Serp1/Ucp2/Ier3ip1/Sox4/Hadh/Rac1/Frmd4a/Prkar1a/Idh2/Bsg/Glul/Arf6/Hmgn3/Kif5b/Gna11/Ptpmt1/Nr1h2/Arf1/Anxa5/Tcf7l2/Dynll1/Eny2	31	GO_BP	up
GO:0010506	regulation of autophagy	29/1210	300/28891	2.80557e-05	0.000877902	0.000643804	Dapl1/Depp1/Plk2/Nupr1/Dcn/Atp13a2/Dapk1/Iigp1/Rmc1/Hspb8/Becn1/Gsk3a/Kat8/Rnf5/Vdac1/Pip4k2c/Trim8/Ubqln1/Scoc/Mapk3/Trp53inp1/Zmpste24/Tmem59/Slc25a5/Mcl1/Rraga/Cttn/Sh3glb1/Ralb	29	GO_BP	up
GO:0046185	aldehyde catabolic process	6/1210	16/28891	2.97193e-05	0.000924674	0.000678104	Aldh2/Hagh/Pnkd/Akr1a1/Esd/Adh5	6	GO_BP	up
GO:0046496	nicotinamide nucleotide metabolic process	13/1210	81/28891	3.03754e-05	0.000938517	0.000688255	Noct/Tkt/Idh1/Nqo1/Mdh2/Fdx1/Txnrd1/Gpd2/Idh2/Taldo1/Prdx5/Pgls/Dcxr	13	GO_BP	up
GO:0019395	fatty acid oxidation	16/1210	117/28891	3.05564e-05	0.000938517	0.000688255	Bdh2/Pdk4/Nucb2/Cygb/Auh/Slc25a17/Hadh/Sox9/Etfa/Eci1/Crot/Adipor1/Hadhb/Hadha/Adh5/Echs1	16	GO_BP	up
GO:0072522	purine-containing compound biosynthetic process	25/1210	241/28891	3.06783e-05	0.000938517	0.000688255	Pdk4/Nppc/Vdac1/Ndufab1/Nudt2/Ppcs/Coasy/Idh2/Sdhb/Ndufa6/Ak2/Ndufc2/Papss1/Gmpr/Ndufc1/Pdhb/Mpc1/Ndufb9/Ndufs4/Atp5pb/Ndufa12/Ndufs5/Ndufa8/Ndufb8/Ndufb6	25	GO_BP	up
GO:0030968	endoplasmic reticulum unfolded protein response	12/1210	70/28891	3.1006e-05	0.000943271	0.000691742	Stc2/Selenos/Serp1/Dnajc3/Derl1/Tmed2/Nfe2l2/Stub1/Hspa5/Bax/Atf4/Eif2s1	12	GO_BP	up
GO:0042063	gliogenesis	35/1210	397/28891	3.1499e-05	0.000950299	0.000696896	Il33/Clu/Grk2/Serpine2/Nkx6-2/Hras/Prpf19/Cd9/Nab2/Pick1/Lrp1/Mdk/Notch1/Hes1/Eif2b3/Cers2/Eed/Tuba1a/Cdk5/Lamb1/Cx3cl1/Sox4/Sox9/Slc25a46/Idh2/Hexb/Mapk3/Eif2b2/Ppp3r1/Bin1/Hdac2/Nfe2l1/Tcf7l2/Nfix/Grb2	35	GO_BP	up
GO:0030041	actin filament polymerization	20/1210	170/28891	3.15841e-05	0.000950299	0.000696896	Gm14137/Capg/Cdc42ep2/Fam107a/Fmn1/Gsn/Prkcd/Map3k1/Vasp/Arpc5/Rac1/Arf6/Bin1/Cttn/Twf1/Capzb/Grb2/Arpc5l/Arpc3/Mtpn	20	GO_BP	up
GO:0043271	negative regulation of monoatomic ion transport	19/1210	157/28891	3.33126e-05	0.000996829	0.000731018	Stc1/Gnao1/Rgs4/Serpine2/Nherf1/Nedd4l/Tmbim6/Hes1/Stk39/Vdac1/Ubqln1/1810037I17Rik/Ppp3r1/Bin1/Calm3/Atf4/Snx27/Calm1/Iscu	19	GO_BP	up
GO:0031398	positive regulation of protein ubiquitination	16/1210	118/28891	3.39937e-05	0.00101168	0.00074191	Fam107a/Trib2/Trib1/Arrdc3/Gsk3a/Aimp2/Derl1/Pttg1ip/Ubqln1/Skp1/Pin1/Stub1/Rbx1/Hspa5/Ube2n/Ube2l3	16	GO_BP	up
GO:0043502	regulation of muscle adaptation	15/1210	106/28891	3.57068e-05	0.00104231	0.000764373	Rgs4/Trim63/Ece1/Fbxo32/Adrb1/Gsn/Notch1/Becn1/Gsk3a/Pin1/Glrx3/Ndufs4/Twf1/Mtpn/Ddx39b	15	GO_BP	up
GO:0000375	RNA splicing, via transesterification reactions	29/1210	304/28891	3.57843e-05	0.00104231	0.000764373	Celf4/Prpf19/Lsm8/Snrpa1/Rbm20/Lsm3/Zcrb1/Malat1/Pcbp4/Rbm4/Dnajc17/Sf3b6/U2af1l4/Scnm1/Srsf10/Hnrnpl/Clns1a/Wbp4/Cwc15/Rbm7/Mbnl2/Syf2/Srsf9/Puf60/Snrpc/Snrpa/Rbm47/Ddx39b/Snrpd3	29	GO_BP	up
GO:0000377	RNA splicing, via transesterification reactions with bulged adenosine as nucleophile	29/1210	304/28891	3.57843e-05	0.00104231	0.000764373	Celf4/Prpf19/Lsm8/Snrpa1/Rbm20/Lsm3/Zcrb1/Malat1/Pcbp4/Rbm4/Dnajc17/Sf3b6/U2af1l4/Scnm1/Srsf10/Hnrnpl/Clns1a/Wbp4/Cwc15/Rbm7/Mbnl2/Syf2/Srsf9/Puf60/Snrpc/Snrpa/Rbm47/Ddx39b/Snrpd3	29	GO_BP	up
GO:0000398	mRNA splicing, via spliceosome	29/1210	304/28891	3.57843e-05	0.00104231	0.000764373	Celf4/Prpf19/Lsm8/Snrpa1/Rbm20/Lsm3/Zcrb1/Malat1/Pcbp4/Rbm4/Dnajc17/Sf3b6/U2af1l4/Scnm1/Srsf10/Hnrnpl/Clns1a/Wbp4/Cwc15/Rbm7/Mbnl2/Syf2/Srsf9/Puf60/Snrpc/Snrpa/Rbm47/Ddx39b/Snrpd3	29	GO_BP	up
GO:0043525	positive regulation of neuron apoptotic process	14/1210	94/28891	3.61315e-05	0.00104686	0.000767707	Nupr1/Ripk1/Nqo1/Casp8/Cdk5/Gsk3a/Aimp2/Pin1/Ube2m/Cdc34/Bax/Atf4/Mcl1/Fis1	14	GO_BP	up
GO:0030072	peptide hormone secretion	30/1210	321/28891	3.88683e-05	0.00112023	0.000821511	Kcnj6/Gnao1/Rab3a/Rapgef4/Pim3/Nucb2/Ildr1/Pick1/Lrp1/Capn10/Osbp/Serp1/Ucp2/Rbm4/Sox4/Hadh/Rac1/Prkar1a/Glul/Hmgn3/Ccdc186/Kif5b/Gna11/Ptpmt1/Anxa5/Tcf7l2/Selenot/Dynll1/Ube2q1/Eny2	30	GO_BP	up
GO:0019362	pyridine nucleotide metabolic process	13/1210	83/28891	3.96166e-05	0.00113581	0.000832942	Noct/Tkt/Idh1/Nqo1/Mdh2/Fdx1/Txnrd1/Gpd2/Idh2/Taldo1/Prdx5/Pgls/Dcxr	13	GO_BP	up
GO:0043484	regulation of RNA splicing	21/1210	187/28891	4.06898e-05	0.00116051	0.000851051	Celf4/Prpf19/Rbm20/Ildr1/Tmbim6/Malat1/Pcbp4/Rbm4/Kat2b/Rps26/Srsf10/Hnrnpl/Clns1a/Taf10/Rbm7/Mbnl2/Srsf9/Hnrnph3/Puf60/Rbm47/Eny2	21	GO_BP	up
GO:0071816	tail-anchored membrane protein insertion into ER membrane	6/1210	17/28891	4.43014e-05	0.00125697	0.000921787	Ubl4a/Emc4/Get4/Emc8/Emc6/Emc7	6	GO_BP	up
GO:0070585	protein localization to mitochondrion	15/1210	108/28891	4.46108e-05	0.00125922	0.000923441	Timm17a/Maip1/Pmpcb/Tomm40/Gsk3a/Pam16/Tomm20/Chchd4/Bax/Rala/Hspd1/Grpel1/Sh3glb1/Bcap31/Fis1	15	GO_BP	up
GO:0033157	regulation of intracellular protein transport	24/1210	232/28891	4.58287e-05	0.00128696	0.000943786	Sfn/Fyn/Cd81/Hras/Tmem30b/Atp13a2/Cib1/Gdi1/Cdk5/Prkcd/Gsk3a/Chchd4/Snx3/Kif5b/Gas6/Sar1b/Sh3glb1/Oaz1/Bcap31/Jup/Fis1/Hsp90ab1/Tmem30a/Anp32b	24	GO_BP	up
GO:1903169	regulation of calcium ion transmembrane transport	22/1210	203/28891	4.65315e-05	0.00130003	0.00095337	Atp1b1/Rgs9/Fyn/Tmem38a/Stac/Cxcl10/Adrb1/Ubash3b/Tmbim6/Cdk5/Vdac1/S100a1/Stim2/Cx3cl1/Ubqln1/1810037I17Rik/Ppp3r1/Bax/Bin1/Calm3/Calm1/Fkbp1a	22	GO_BP	up
GO:0070203	regulation of establishment of protein localization to telomere	5/1210	11/28891	4.77918e-05	0.00132538	0.000971958	Cct7/Cct2/Tcp1/Cct6a/Cct8	5	GO_BP	up
GO:0022618	protein-RNA complex assembly	20/1210	175/28891	4.79228e-05	0.00132538	0.000971958	Celf4/Prpf19/Brix1/Eif2s2/Mrto4/Rrs1/Mrpl20/Srsf10/Eif5/Clns1a/Rps27l/Ramac/Xrcc5/Ruvbl1/Rplp0/Puf60/Snrpc/Mrps7/Ddx39b/Snrpd3	20	GO_BP	up
GO:0090276	regulation of peptide hormone secretion	26/1210	264/28891	5.22153e-05	0.00143684	0.0010537	Kcnj6/Gnao1/Rapgef4/Pim3/Nucb2/Ildr1/Pick1/Lrp1/Capn10/Osbp/Serp1/Ucp2/Sox4/Hadh/Rac1/Prkar1a/Glul/Hmgn3/Kif5b/Gna11/Ptpmt1/Anxa5/Tcf7l2/Selenot/Dynll1/Eny2	26	GO_BP	up
GO:0006874	intracellular calcium ion homeostasis	30/1210	327/28891	5.47312e-05	0.00149001	0.00109269	Stc1/Cav2/Atp1b1/Nppc/Edn2/Rmdn3/Stc2/Tmem38a/Atp13a2/Nucb2/Marcksl1/Cxcl10/Ubash3b/Maip1/Tmbim6/Cdk5/1600014C10Rik/Kcnh1/Stim2/Cx3cl1/Hexb/Bax/Calm3/Atf4/Ghitm/Calm1/Bcap31/Fis1/Fkbp1a/Selenok	30	GO_BP	up
GO:2000144	positive regulation of DNA-templated transcription initiation	12/1210	74/28891	5.48332e-05	0.00149001	0.00109269	Med31/Cebpa/Sub1/Nfkbia/Med30/Med7/Psmc6/Nfkb1/Med28/Taf10/Med19/Gtf2a2	12	GO_BP	up
GO:0051788	response to misfolded protein	7/1210	25/28891	5.49638e-05	0.00149001	0.00109269	Clu/Ufd1/Derl1/Rnf5/Rnf126/Stub1/Akirin2	7	GO_BP	up
GO:2001243	negative regulation of intrinsic apoptotic signaling pathway	15/1210	110/28891	5.54082e-05	0.00149466	0.0010961	Clu/Fyn/Hspb1/Selenos/Tmbim6/Bag5/Cdkn2d/Vdac2/Pttg1ip/Ybx3/Nfe2l2/Mif/Hdac2/Atf4/Sh3glb1	15	GO_BP	up
GO:0030073	insulin secretion	26/1210	266/28891	5.92575e-05	0.00159066	0.0011665	Kcnj6/Gnao1/Rab3a/Rapgef4/Pim3/Pick1/Lrp1/Capn10/Osbp/Serp1/Ucp2/Rbm4/Sox4/Hadh/Rac1/Prkar1a/Glul/Hmgn3/Ccdc186/Kif5b/Gna11/Ptpmt1/Tcf7l2/Selenot/Dynll1/Eny2	26	GO_BP	up
GO:0030865	cortical cytoskeleton organization	10/1210	53/28891	6.03431e-05	0.0016119	0.00118207	Pls1/Rab13/Racgap1/Cdk5/Rtkn/Ppp2r3c/Ezr/Rac1/Arf6/Septin7	10	GO_BP	up
GO:0002790	peptide secretion	30/1210	329/28891	6.11945e-05	0.00161885	0.00118717	Kcnj6/Gnao1/Rab3a/Rapgef4/Pim3/Nucb2/Ildr1/Pick1/Lrp1/Capn10/Osbp/Serp1/Ucp2/Rbm4/Sox4/Hadh/Rac1/Prkar1a/Glul/Hmgn3/Ccdc186/Kif5b/Gna11/Ptpmt1/Anxa5/Tcf7l2/Selenot/Dynll1/Ube2q1/Eny2	30	GO_BP	up
GO:0016032	viral process	30/1210	329/28891	6.11945e-05	0.00161885	0.00118717	Cav2/Tmprss2/Grk2/Nectin2/Dynlt1f/Isg20/Gsn/Notch1/Zfp36/Zfp639/Dynlt1c/Map3k1/Tsg101/Chmp4c/Chmp1b/Slc3a2/Chmp5/Gtf2b/Trim8/Snx3/Csnk2b/Bsg/Rnasek/Psmc3/Pcbp1/Gas6/P4hb/Vapa/Eif3l/Ly6e	30	GO_BP	up
GO:1903008	organelle disassembly	17/1210	137/28891	6.18379e-05	0.001628	0.00119388	Capn10/Pnpla2/Pelo/Becn1/Gsk3a/Map1lc3a/Vdac1/Gabarapl2/Slc25a46/Kif5b/Fundc1/Slc25a5/Cttn/Atg3/Uba5/Fis1/Ufc1	17	GO_BP	up
GO:0009914	hormone transport	35/1210	411/28891	6.37925e-05	0.00167142	0.00122573	Kcnj6/Gnao1/Selenom/Rab3a/Edn2/Rapgef4/Pim3/Nucb2/Ildr1/Pick1/Lrp1/Capn10/Osbp/Serp1/Ucp2/Slc3a2/Rbm4/Sox4/Hadh/Rac1/Prkar1a/Kdm5b/Glul/Hmgn3/Tmf1/Ccdc186/Kif5b/Gna11/Ptpmt1/Anxa5/Tcf7l2/Selenot/Dynll1/Ube2q1/Eny2	35	GO_BP	up
GO:0032386	regulation of intracellular transport	31/1210	346/28891	6.46504e-05	0.00167607	0.00122914	Sfn/Fyn/Cd81/Hras/Tmem30b/Atp13a2/Cib1/Capn10/Gdi1/Cdk5/Ier3/Prkcd/Gsk3a/Ezr/Rbm4/Chchd4/Snx3/Mapk3/Kif5b/Gas6/Sar1b/Arf1/Sh3glb1/Oaz1/Bcap31/Jup/Rab11a/Fis1/Hsp90ab1/Tmem30a/Anp32b	31	GO_BP	up
GO:0034763	negative regulation of transmembrane transport	18/1210	151/28891	6.48813e-05	0.00167607	0.00122914	Rgs4/Grk2/Nherf1/Nedd4l/Tmbim6/Gsk3a/Stk39/Vdac1/Ubqln1/1810037I17Rik/Arl6ip5/Ppp3r1/Bin1/Calm3/Snx27/Calm1/Oaz1/Iscu	18	GO_BP	up
GO:0046718	viral entry into host cell	14/1210	99/28891	6.48881e-05	0.00167607	0.00122914	Cav2/Tmprss2/Grk2/Nectin2/Gsn/Zfp639/Slc3a2/Trim8/Snx3/Bsg/Rnasek/Gas6/P4hb/Ly6e	14	GO_BP	up
GO:0022406	membrane docking	13/1210	87/28891	6.56633e-05	0.00168813	0.00123798	Cav2/Gnao1/Rab3a/Rab13/Exoc7/Uso1/Snx3/Stx7/Stx11/Vapa/Stx6/Calm1/Ralb	13	GO_BP	up
GO:0031346	positive regulation of cell projection organization	38/1210	463/28891	6.95506e-05	0.00177622	0.00130258	Gm14137/Crabp2/Cd24a/Fyn/Serpine2/Cdc42ep2/Hspb1/Hras/Atp8a2/Tnfrsf12a/Dynlt1f/Vldlr/Sgk1/Lrp1/Mdk/Scn1b/Tubb2b/Gdi1/Dynlt1c/Nin/Cx3cl1/Rac1/Kat2b/Akirin1/Snx3/Nfe2l2/Stk25/Eif2b2/Hspa5/Ranbp1/Rala/Mien1/Ift20/Twf1/Sh3glb1/Dynll1/Tmem30a/Septin7	38	GO_BP	up
GO:0030099	myeloid cell differentiation	39/1210	480/28891	6.97383e-05	0.00177622	0.00130258	Il33/Pir/Cd81/Alas1/Jag1/Cebpb/Dnase2a/Racgap1/Ripk1/Hmgb2/Ubash3b/Trib1/Rara/Cib1/Cebpa/Zfp36/Paf1/Cited2/Ucp2/Casp8/Socs1/Nfkbia/Kat8/Pithd1/Ltbr/Leo1/Tcf3/Cebpg/Lyar/Sfxn1/Junb/Prmt1/Brd1/Slc25a5/Nfe2l1/Abi1/Uba5/Nfix/Smap1	39	GO_BP	up
GO:0002791	regulation of peptide secretion	26/1210	269/28891	7.14258e-05	0.00180374	0.00132276	Kcnj6/Gnao1/Rapgef4/Pim3/Nucb2/Ildr1/Pick1/Lrp1/Capn10/Osbp/Serp1/Ucp2/Sox4/Hadh/Rac1/Prkar1a/Glul/Hmgn3/Kif5b/Gna11/Ptpmt1/Anxa5/Tcf7l2/Selenot/Dynll1/Eny2	26	GO_BP	up
GO:0008064	regulation of actin polymerization or depolymerization	19/1210	166/28891	7.18521e-05	0.00180374	0.00132276	Gm14137/Capg/Cdc42ep2/Fmn1/Gsn/Prkcd/Map3k1/Vasp/Arpc5/Rac1/Arf6/Bin1/Cttn/Twf1/Capzb/Grb2/Arpc5l/Arpc3/Mtpn	19	GO_BP	up
GO:0022408	negative regulation of cell-cell adhesion	22/1210	209/28891	7.21364e-05	0.00180374	0.00132276	Dapl1/Cd24a/Arg2/Nrarp/Serpine2/Hspb1/Rgcc/Cd274/Cd9/Jag1/Cebpb/Ubash3b/Mdk/Notch1/Irf1/Prkcd/Socs1/Sdc4/Prkar1a/Prdx2/Epcam/Gtpbp4	22	GO_BP	up
GO:0034767	positive regulation of monoatomic ion transmembrane transport	22/1210	209/28891	7.21364e-05	0.00180374	0.00132276	Atp1b1/Rgs9/Prss8/Nherf1/Nedd4l/Stac/Cxcl10/Adrb1/Cox17/Scn1b/Cdk5/Stk39/S100a1/Stim2/Cx3cl1/Atp1b3/Kif5b/Ppp3r1/Bax/Calm3/Arf1/Calm1	22	GO_BP	up
GO:0010765	positive regulation of sodium ion transport	9/1210	44/28891	7.25294e-05	0.00180532	0.00132392	Cxcl1/Atp1b1/Prss8/Nedd4l/Sgk1/Scn1b/Atp1b3/Kif5b/Arf1	9	GO_BP	up
GO:0034248	regulation of amide metabolic process	39/1210	482/28891	7.61989e-05	0.00188808	0.00138461	Pdk4/Clu/Dapk1/Noct/Rara/Zfp36/Serp1/Polr2g/Btg2/Prkcd/Pelo/Cnot11/Gsk3a/Dnajc3/Rbm4/Tmed2/Sox4/Gapdh/Nfe2l2/Prmt1/Pin1/Eif4e/Mapk3/Tsfm/Eif5/Csnk1e/Bin1/Pa2g4/Rps27l/Cnot6/Sarnp/Lsm1/Srp9/Eif3k/Mrpl13/Paip2/Ddx39b/Eef2/Eif2s1	39	GO_BP	up
GO:0070202	regulation of establishment of protein localization to chromosome	5/1210	12/28891	7.9098e-05	0.0019376	0.00142093	Cct7/Cct2/Tcp1/Cct6a/Cct8	5	GO_BP	up
GO:0070863	positive regulation of protein exit from endoplasmic reticulum	5/1210	12/28891	7.9098e-05	0.0019376	0.00142093	Cd81/Tmem30b/Sar1b/Bcap31/Tmem30a	5	GO_BP	up
GO:0006099	tricarboxylic acid cycle	8/1210	35/28891	7.92591e-05	0.0019376	0.00142093	Idh1/Mdh2/Aco2/Idh2/Sdhb/Pdhb/Ndufs4/Suclg1	8	GO_BP	up
GO:0090087	regulation of peptide transport	26/1210	271/28891	8.07375e-05	0.00195535	0.00143394	Kcnj6/Gnao1/Rapgef4/Pim3/Nucb2/Ildr1/Pick1/Lrp1/Capn10/Osbp/Serp1/Ucp2/Sox4/Hadh/Rac1/Prkar1a/Glul/Hmgn3/Kif5b/Gna11/Ptpmt1/Anxa5/Tcf7l2/Selenot/Dynll1/Eny2	26	GO_BP	up
GO:0006754	ATP biosynthetic process	14/1210	101/28891	8.10564e-05	0.00195535	0.00143394	Ndufab1/Nudt2/Sdhb/Ndufa6/Ndufc2/Ndufc1/Ndufb9/Ndufs4/Atp5pb/Ndufa12/Ndufs5/Ndufa8/Ndufb8/Ndufb6	14	GO_BP	up
GO:0035773	insulin secretion involved in cellular response to glucose stimulus	14/1210	101/28891	8.10564e-05	0.00195535	0.00143394	Pim3/Lrp1/Osbp/Ucp2/Rbm4/Rac1/Hmgn3/Ccdc186/Kif5b/Ptpmt1/Tcf7l2/Selenot/Dynll1/Eny2	14	GO_BP	up
GO:0006900	vesicle budding from membrane	12/1210	77/28891	8.18298e-05	0.00196535	0.00144128	Trappc6b/Sec13/Chmp4c/Trappc2/Chmp5/S100a10/Trappc4/Snx3/Trappc2l/Vapa/Sar1b/Arf1	12	GO_BP	up
GO:0005996	monosaccharide metabolic process	27/1210	287/28891	8.29586e-05	0.00198376	0.00145478	Fbp2/Pdk4/Pgm1/Dusp12/Got1/Man2b1/Mdh2/Serp1/Kbtbd2/B4galt1/Ganc/Zfp692/Gclc/Slc25a11/Gpd2/Kat2b/Gapdh/Hexb/Adipor1/Zmpste24/Pdhb/Atf4/Nfe2l1/Tcf7l2/Akr1a1/Dcxr/Arpp19	27	GO_BP	up
GO:1901800	positive regulation of proteasomal protein catabolic process	15/1210	114/28891	8.40568e-05	0.00200128	0.00146763	Il33/Clu/Plk2/Nupr1/Trib2/Trib1/Gsk3a/Gclc/Ubqln1/Dda1/Stub1/Rbx1/Csnk1e/Bcap31/Csnk1a1	15	GO_BP	up
GO:0008016	regulation of heart contraction	21/1210	197/28891	8.70256e-05	0.002063	0.00151289	Stc1/Irx3/Gnao1/Rgs4/Atp1b1/Edn2/Grk2/Tmem38a/Adrb1/Scn1b/Gsk3a/S100a1/Atp1a1/Dsc2/Glrx3/Bin1/Zmpste24/Calm3/Calm1/Pebp1/Jup	21	GO_BP	up
GO:0002064	epithelial cell development	24/1210	242/28891	8.94267e-05	0.00210591	0.00154435	Stc1/Rarb/Sfn/Tfcp2l1/Rab25/Ppp1r16b/Jag1/Rab13/Klf5/Ccm2/Cgn/Rara/Notch1/Cebpa/B4galt1/Map3k1/Adrm1/Ezr/St14/Sox9/Rac1/Clic4/Col18a1/Atf4	24	GO_BP	up
GO:0003159	morphogenesis of an endothelium	6/1210	19/28891	9.03656e-05	0.00210591	0.00154435	Fgf1/Cxcl10/Ccm2/Rhob/Csnk2b/Bsg	6	GO_BP	up
GO:0061154	endothelial tube morphogenesis	6/1210	19/28891	9.03656e-05	0.00210591	0.00154435	Fgf1/Cxcl10/Ccm2/Rhob/Csnk2b/Bsg	6	GO_BP	up
GO:1904063	negative regulation of cation transmembrane transport	14/1210	102/28891	9.03796e-05	0.00210591	0.00154435	Rgs4/Nherf1/Nedd4l/Tmbim6/Stk39/Vdac1/Ubqln1/1810037I17Rik/Ppp3r1/Bin1/Calm3/Snx27/Calm1/Iscu	14	GO_BP	up
GO:0072073	kidney epithelium development	18/1210	155/28891	9.13299e-05	0.00210591	0.00154435	Irx3/Rarb/Cd24a/Arg2/Pgf/Aqp11/Fgf1/Hey1/Jag1/Six1/Heyl/Fmn1/Rara/Notch1/Hes1/Lzts2/Sox9/Epcam	18	GO_BP	up
GO:0010950	positive regulation of endopeptidase activity	19/1210	169/28891	9.15278e-05	0.00210591	0.00154435	F3/Fyn/Dapk1/Gsn/Perp/Casp8/Tbc1d10a/Cycs/Psme2/Ctsd/Arl6ip5/Bax/Rps27l/Hspd1/Akirin2/Bcap31/Fis1/Anp32b/Rnf7	19	GO_BP	up
GO:0030832	regulation of actin filament length	19/1210	169/28891	9.15278e-05	0.00210591	0.00154435	Gm14137/Capg/Cdc42ep2/Fmn1/Gsn/Prkcd/Map3k1/Vasp/Arpc5/Rac1/Arf6/Bin1/Cttn/Twf1/Capzb/Grb2/Arpc5l/Arpc3/Mtpn	19	GO_BP	up
GO:0044282	small molecule catabolic process	31/1210	353/28891	9.35417e-05	0.00214324	0.00157173	Bdh2/Ces1d/Cdo1/Arg2/Dera/Cryl1/Urah/Upb1/Got1/Auh/Slc25a17/Hagh/Aasdhppt/Nudt3/Hadh/Etfa/Gapdh/Hexb/Eci1/Crot/Pnkd/Hadhb/Qdpr/Akr1a1/Esd/Dcxr/Hadha/Adh5/Echs1/Gnpda2/Hibadh	31	GO_BP	up
GO:0045324	late endosome to vacuole transport	7/1210	27/28891	9.43524e-05	0.00215281	0.00157875	Vps36/Vta1/Becn1/Chmp4c/Chmp1b/Chmp5/Leprotl1	7	GO_BP	up
GO:0046879	hormone secretion	34/1210	403/28891	9.66547e-05	0.00219619	0.00161056	Kcnj6/Gnao1/Selenom/Rab3a/Edn2/Rapgef4/Pim3/Nucb2/Ildr1/Pick1/Lrp1/Capn10/Osbp/Serp1/Ucp2/Rbm4/Sox4/Hadh/Rac1/Prkar1a/Kdm5b/Glul/Hmgn3/Tmf1/Ccdc186/Kif5b/Gna11/Ptpmt1/Anxa5/Tcf7l2/Selenot/Dynll1/Ube2q1/Eny2	34	GO_BP	up
GO:0060261	positive regulation of transcription initiation by RNA polymerase II	11/1210	67/28891	9.9039e-05	0.00223704	0.00164052	Med31/Sub1/Nfkbia/Med30/Med7/Psmc6/Nfkb1/Med28/Taf10/Med19/Gtf2a2	11	GO_BP	up
GO:1904375	regulation of protein localization to cell periphery	18/1210	156/28891	9.92697e-05	0.00223704	0.00164052	Dpp10/Gpc6/Rapgef4/Pls1/Hras/Stac/Lrp1/Cib1/Cdk5/Ezr/Rer1/Tmed2/Arf6/Stx7/Kif5b/Tmem59/Csnk2a1/Rab11a	18	GO_BP	up
GO:1904035	regulation of epithelial cell apoptotic process	16/1210	129/28891	0.000101217	0.00227157	0.00166584	Nupr1/Rgcc/Pak4/Mdk/Gsn/Capn10/Zfp36/Nfe2l2/Pdcd4/Tmf1/Gas6/Bax/Col18a1/Cdkn1b/Tcf7l2/Eif2s1	16	GO_BP	up
GO:0031503	protein-containing complex localization	24/1210	244/28891	0.000101657	0.00227214	0.00166626	Gpc6/Rapgef4/Hras/Tnfaip2/Pick1/Ssx2ip/Fkbp4/Shisa6/Ezr/Snapin/Sh3glb2/Stx7/Kif5b/Ift43/Ppp3r1/Snap47/Mzt1/Rala/Ift20/Akirin2/Dynll1/Ralb/Rab11a/Ap2s1	24	GO_BP	up
GO:0051648	vesicle localization	22/1210	214/28891	0.00010237	0.00227579	0.00166894	Rab3a/Atp13a2/Bloc1s4/Trappc6b/Exoc7/Cdk5/Tsg101/Trappc2/Sdc4/Trappc4/Snapin/Uso1/Stard3nl/Tpgs1/Trappc2l/Ccdc186/Kif5b/Sar1b/Arf1/Tmem230/Tcf7l2/Rab11a	22	GO_BP	up
GO:1902115	regulation of organelle assembly	23/1210	229/28891	0.000102652	0.00227579	0.00166894	Plk2/Nupr1/Gsn/Tsg101/Becn1/Chmp4c/Chmp1b/Ezr/Chmp5/Rnf5/Pip4k2c/Sdc4/Kat2b/Cnot6/Ift20/Atg3/Sh3glb1/Dynll1/Ralb/Rab11a/Cript/Septin7/Gdi2	23	GO_BP	up
GO:0035264	multicellular organism growth	23/1210	230/28891	0.000109628	0.00242066	0.00177518	Gdf15/Rarb/Selenom/Nppc/Foxs1/Pls1/Stc2/Atp8a2/Adrb1/Ccm2/Tbl1xr1/Rara/H3f3b/Ezr/Tmed2/Gpd2/Clic4/H3f3a/Zmpste24/Taf10/Spr/Tcf7l2/Nfix	23	GO_BP	up
GO:0051656	establishment of organelle localization	39/1210	491/28891	0.000112527	0.00247468	0.00181479	Rab3a/Nppc/Nherf1/Nectin2/Atp13a2/Racgap1/Bloc1s4/Trappc6b/Exoc7/Tuba1a/Cdk5/Tsg101/Becn1/Chmp4c/Chmp1b/Trappc2/Ezr/Chmp5/Sdc4/Trappc4/Snapin/Zbed3/Kat2b/Rrs1/Stard3nl/Trappc2l/Stk25/Ccdc186/Kif5b/Borcs8/Nsfl1c/Ube2b/Copg1/Sar1b/Arf1/Tmem230/Actr10/Dynll1/Rab11a	39	GO_BP	up
GO:0003300	cardiac muscle hypertrophy	15/1210	117/28891	0.000113322	0.00248222	0.00182032	Rgs4/Trim63/Ece1/Sorbs2/Fbxo32/Adrb1/Gsn/Notch1/Becn1/Gsk3a/Pin1/Glrx3/Twf1/Mtpn/Ddx39b	15	GO_BP	up
GO:0030838	positive regulation of actin filament polymerization	10/1210	57/28891	0.000114833	0.00250528	0.00183723	Gm14137/Cdc42ep2/Fmn1/Map3k1/Vasp/Rac1/Arf6/Bin1/Cttn/Grb2	10	GO_BP	up
GO:0043270	positive regulation of monoatomic ion transport	26/1210	277/28891	0.000115545	0.00251081	0.00184129	Stc1/Cxcl1/Atp1b1/Rgs9/Prss8/Nherf1/Nedd4l/Stac/Cxcl10/Adrb1/Sgk1/Cox17/Scn1b/Cdk5/Stk39/S100a1/Stim2/Cx3cl1/Atp1b3/Kif5b/Ppp3r1/Bax/Hbp1/Calm3/Arf1/Calm1	26	GO_BP	up
GO:0072524	pyridine-containing compound metabolic process	13/1210	92/28891	0.000118134	0.00255693	0.00187511	Noct/Tkt/Idh1/Nqo1/Mdh2/Fdx1/Txnrd1/Gpd2/Idh2/Taldo1/Prdx5/Pgls/Dcxr	13	GO_BP	up
GO:0032868	response to insulin	25/1210	262/28891	0.000119614	0.00257877	0.00189113	Cav2/Ptpre/Pdk4/Grk2/Hras/Nucb2/Rab13/Sgk1/Capn10/Kbtbd2/Prkcd/Socs1/Gsk3a/Rbm4/Pip4k2c/Ctsd/Zbed3/Kat2b/Uso1/Mapk3/Adipor1/Slc27a1/Snx5/Hadha/Grb2	25	GO_BP	up
GO:0007265	Ras protein signal transduction	30/1210	342/28891	0.000122846	0.00263805	0.0019346	Gm14137/Rhov/Kctd13/Plk2/Rapgef4/Cdc42ep2/Hras/Rhou/Arhgap24/Dynlt1f/Adrb1/Racgap1/Cyth2/Notch1/Ssx2ip/Rab4b/Dynlt1c/Rtkn/Rab15/Nkiras1/Net1/Rac1/Arf6/Timp2/Flot1/Nras/Rala/Ralb/Nfix/Grb2	30	GO_BP	up
GO:1904816	positive regulation of protein localization to chromosome, telomeric region	5/1210	13/28891	0.000124098	0.00264551	0.00194007	Cct7/Cct2/Tcp1/Cct6a/Cct8	5	GO_BP	up
GO:0072080	nephron tubule development	14/1210	105/28891	0.000124159	0.00264551	0.00194007	Irx3/Cd24a/Pgf/Aqp11/Fgf1/Hey1/Jag1/Six1/Heyl/Fmn1/Notch1/Hes1/Lzts2/Sox9	14	GO_BP	up
GO:0015833	peptide transport	30/1210	343/28891	0.000129353	0.00274549	0.00201339	Kcnj6/Gnao1/Rab3a/Rapgef4/Pim3/Nucb2/Ildr1/Pick1/Lrp1/Capn10/Osbp/Serp1/Ucp2/Rbm4/Sox4/Hadh/Rac1/Prkar1a/Glul/Hmgn3/Ccdc186/Kif5b/Gna11/Ptpmt1/Anxa5/Tcf7l2/Selenot/Dynll1/Ube2q1/Eny2	30	GO_BP	up
GO:0050714	positive regulation of protein secretion	20/1210	188/28891	0.000130467	0.00275224	0.00201834	Rapgef4/Atp13a2/Lrp1/Capn10/Osbp/Serp1/Ier3ip1/Sox4/Rac1/Frmd4a/Prkar1a/Bsg/Glul/Arf6/Kif5b/Gna11/Nr1h2/Arf1/Tcf7l2/Dynll1	20	GO_BP	up
GO:0032984	protein-containing complex disassembly	24/1210	248/28891	0.000130676	0.00275224	0.00201834	Capg/Sgk1/Gsn/Cib1/Napa/H2ac25/Becn1/Chmp4c/Chmp1b/Chmp5/Map1lc3a/Dnajc17/Ubqln1/Snapin/Mrpl58/Cebpg/Smarcd2/Kif5b/Zmpste24/Twf1/Calm1/Capzb/Lamp2/Mtpn	24	GO_BP	up
GO:0052548	regulation of endopeptidase activity	31/1210	360/28891	0.000133571	0.00279233	0.00204774	Sfn/F3/Fyn/Grk2/Serpine2/Atp13a2/Dapk1/Gsn/Perp/Cdkn2d/Serpinb5/Casp8/Tbc1d10a/Cycs/Psme2/Ctsd/Arl6ip5/Gapdh/Dnajb6/Timp2/Gas6/Bax/Bin1/Rps27l/Hspd1/Akirin2/Bcap31/Fis1/Psma3/Anp32b/Rnf7	31	GO_BP	up
GO:0045010	actin nucleation	10/1210	58/28891	0.000133599	0.00279233	0.00204774	Fmn1/Pick1/Gsn/Arpc5/Arpc1b/Arpc1a/Rnh1/Arf1/Arpc5l/Arpc3	10	GO_BP	up
GO:0009566	fertilization	22/1210	218/28891	0.000134167	0.00279353	0.00204862	Plat/Rab3a/Nectin2/Cd9/Plcd4/Cct7/Tpst2/B4galt1/Vdac2/H3f3b/Pithd1/Ybx3/Clic4/Kdm5b/Hexb/H3f3a/Bax/Cct2/Tcp1/Cct6a/Ube2q1/Cct8	22	GO_BP	up
GO:0140056	organelle localization by membrane tethering	12/1210	81/28891	0.000135068	0.00280163	0.00205456	Cav2/Gnao1/Rab3a/Rab13/Exoc7/Uso1/Stx7/Stx11/Vapa/Stx6/Calm1/Ralb	12	GO_BP	up
GO:0033002	muscle cell proliferation	26/1210	280/28891	0.000137534	0.00284203	0.00208418	Cav2/Cdkn1a/Grk2/Ndrg2/Spon2/Hpgd/Fgf1/Six1/Ccnd2/Trib1/Notch1/Mmp2/Cited2/Cx3cl1/Prkar1a/Akirin1/Pim1/Pdcd4/Hdac2/Cdkn1b/Vgll4/Comt/Xrcc5/Tcf7l2/Sugt1/Ddx39b	26	GO_BP	up
GO:0051924	regulation of calcium ion transport	27/1210	296/28891	0.000138846	0.00285836	0.00209616	Stc1/Gnao1/Rgs4/Atp1b1/Rgs9/Fyn/Stc2/Tmem38a/Stac/Cxcl10/Adrb1/Ubash3b/Tmbim6/Hes1/Cdk5/Vdac1/S100a1/Stim2/Cx3cl1/Ubqln1/1810037I17Rik/Ppp3r1/Bax/Bin1/Calm3/Calm1/Fkbp1a	27	GO_BP	up
GO:0009749	response to glucose	21/1210	204/28891	0.000142937	0.00292945	0.00214829	Grk2/Pim3/Lrp1/Eif2b3/Osbp/Ucp2/Rbm4/Sox4/Rac1/Zbed3/Glul/Hmgn3/Ccdc186/Kif5b/Eif2b2/Gas6/Ptpmt1/Tcf7l2/Selenot/Dynll1/Eny2	21	GO_BP	up
GO:0032869	cellular response to insulin stimulus	22/1210	219/28891	0.00014337	0.00292945	0.00214829	Cav2/Ptpre/Pdk4/Grk2/Hras/Nucb2/Rab13/Sgk1/Capn10/Prkcd/Socs1/Gsk3a/Rbm4/Pip4k2c/Ctsd/Kat2b/Uso1/Mapk3/Adipor1/Slc27a1/Snx5/Grb2	22	GO_BP	up
GO:1902175	regulation of oxidative stress-induced intrinsic apoptotic signaling pathway	8/1210	38/28891	0.000147312	0.00299882	0.00219916	Fyn/Hspb1/Bag5/Ubqln1/Nfe2l2/P4hb/Atf4/Mcl1	8	GO_BP	up
GO:0003012	muscle system process	36/1210	446/28891	0.000148271	0.00300716	0.00220528	Stc1/Rgs4/Trim63/Ece1/Arg2/Atp1b1/Nppc/Sorbs2/Edn2/Fbxo32/Grk2/Nedd4l/Tmem38a/Stac/Atp8a2/Adrb1/Gsn/Notch1/Scn1b/Becn1/Gsk3a/Atp1a1/Pin1/Dsc2/Glrx3/Bin1/Calm3/Ndufs4/Cttn/Twf1/Calm1/Jup/Mtpn/Ddx39b/Fkbp1a/Tpm3	36	GO_BP	up
GO:1903076	regulation of protein localization to plasma membrane	15/1210	120/28891	0.000151086	0.00305294	0.00223885	Dpp10/Pls1/Stac/Lrp1/Cib1/Cdk5/Ezr/Rer1/Tmed2/Arf6/Stx7/Kif5b/Tmem59/Csnk2a1/Rab11a	15	GO_BP	up
GO:0033119	negative regulation of RNA splicing	7/1210	29/28891	0.000154111	0.00309291	0.00226816	Celf4/Rbm20/Tmbim6/Pcbp4/Rps26/Srsf10/Srsf9	7	GO_BP	up
GO:0034764	positive regulation of transmembrane transport	26/1210	282/28891	0.000154193	0.00309291	0.00226816	Ocln/Atp1b1/Rgs9/Prss8/Nherf1/Nedd4l/Stac/Cxcl10/Adrb1/Cox17/Capn10/Scn1b/Cdk5/Prkcd/Stk39/S100a1/Stim2/Cx3cl1/Atp1b3/Nfe2l2/Kif5b/Ppp3r1/Bax/Calm3/Arf1/Calm1	26	GO_BP	up
GO:2001056	positive regulation of cysteine-type endopeptidase activity	17/1210	148/28891	0.000161905	0.00323574	0.00237291	F3/Fyn/Dapk1/Gsn/Perp/Casp8/Tbc1d10a/Cycs/Ctsd/Arl6ip5/Bax/Rps27l/Hspd1/Bcap31/Fis1/Anp32b/Rnf7	17	GO_BP	up
GO:0031345	negative regulation of cell projection organization	22/1210	221/28891	0.000163467	0.00324327	0.00237843	Fyn/Arhgap24/Sema3f/Rab3ip/Cyth2/Lrp1/Hes1/Itm2c/Cib1/Bag5/Cers2/Gdi1/Cdk5/Prkcd/Gsk3a/Ifrd1/Snapin/Arf6/Mylip/Hdac2/Capzb/Gdi2	22	GO_BP	up
GO:0050796	regulation of insulin secretion	22/1210	221/28891	0.000163467	0.00324327	0.00237843	Kcnj6/Gnao1/Rapgef4/Pim3/Pick1/Lrp1/Capn10/Osbp/Serp1/Ucp2/Sox4/Hadh/Rac1/Prkar1a/Glul/Hmgn3/Kif5b/Gna11/Ptpmt1/Tcf7l2/Dynll1/Eny2	22	GO_BP	up
GO:0014897	striated muscle hypertrophy	15/1210	121/28891	0.000165894	0.00327955	0.00240504	Rgs4/Trim63/Ece1/Sorbs2/Fbxo32/Adrb1/Gsn/Notch1/Becn1/Gsk3a/Pin1/Glrx3/Twf1/Mtpn/Ddx39b	15	GO_BP	up
GO:2000060	positive regulation of ubiquitin-dependent protein catabolic process	14/1210	108/28891	0.000168366	0.00331644	0.00243209	Il33/Clu/Plk2/Trib2/Trib1/Gsk3a/Gclc/Ubqln1/Dda1/Stub1/Rbx1/Csnk1e/Bcap31/Csnk1a1	14	GO_BP	up
GO:1902305	regulation of sodium ion transmembrane transport	11/1210	71/28891	0.00016942	0.00332524	0.00243854	Atp1b1/Prss8/Nherf1/Nedd4l/Pick1/Fxyd3/Scn1b/Stk39/Atp1b3/Kif5b/Arf1	11	GO_BP	up
GO:0046034	ATP metabolic process	16/1210	135/28891	0.000173397	0.00339114	0.00248687	Atp1b1/Ndufab1/Nudt2/Sdhb/Ndufa6/Ndufc2/Ndufc1/Ndufb9/Ndufs4/Atp5pb/Ndufa12/Ndufs5/Fis1/Ndufa8/Ndufb8/Ndufb6	16	GO_BP	up
GO:0009746	response to hexose	21/1210	207/28891	0.000175323	0.00341662	0.00250555	Grk2/Pim3/Lrp1/Eif2b3/Osbp/Ucp2/Rbm4/Sox4/Rac1/Zbed3/Glul/Hmgn3/Ccdc186/Kif5b/Eif2b2/Gas6/Ptpmt1/Tcf7l2/Selenot/Dynll1/Eny2	21	GO_BP	up
GO:0071478	cellular response to radiation	19/1210	178/28891	0.000181967	0.00353351	0.00259127	Rgs9/Cdkn1a/Hras/Ccnd2/Mmp2/Gadd45a/Rhob/Tmem109/H2ac25/Prkcd/Net1/Rbx1/Trp53inp1/Bax/Zmpste24/Xrcc5/Grb2/Gtf2h5/Eif2s1	19	GO_BP	up
GO:0006576	biogenic amine metabolic process	14/1210	109/28891	0.000185846	0.0035795	0.002625	Sncb/Rtl4/Sncaip/Smox/Nr4a2/Aldh2/Dhps/Sms/Pnkd/Ndufs4/Spr/Comt/Oaz1/Ly6e	14	GO_BP	up
GO:0009743	response to carbohydrate	22/1210	223/28891	0.000186014	0.0035795	0.002625	Grk2/Pim3/Lrp1/Eif2b3/Osbp/Ucp2/Rbm4/Sox4/Rac1/Zbed3/Nfkb1/Glul/Hmgn3/Ccdc186/Kif5b/Eif2b2/Gas6/Ptpmt1/Tcf7l2/Selenot/Dynll1/Eny2	22	GO_BP	up
GO:0010952	positive regulation of peptidase activity	20/1210	193/28891	0.000186296	0.0035795	0.002625	F3/Fyn/Dapk1/Gsn/Perp/Casp8/Tbc1d10a/Cycs/Psme2/Ctsd/Ctsl/Arl6ip5/Bax/Rps27l/Hspd1/Akirin2/Bcap31/Fis1/Anp32b/Rnf7	20	GO_BP	up
GO:0034284	response to monosaccharide	21/1210	208/28891	0.000187471	0.00358948	0.00263232	Grk2/Pim3/Lrp1/Eif2b3/Osbp/Ucp2/Rbm4/Sox4/Rac1/Zbed3/Glul/Hmgn3/Ccdc186/Kif5b/Eif2b2/Gas6/Ptpmt1/Tcf7l2/Selenot/Dynll1/Eny2	21	GO_BP	up
GO:0032411	positive regulation of transporter activity	16/1210	136/28891	0.000189006	0.00360626	0.00264463	Atp1b1/Rgs9/Nedd4l/Stac/Adrb1/Cox17/Scn1b/Cdk5/Prkcd/Stk39/S100a1/Stim2/Atp1b3/Kif5b/Calm3/Calm1	16	GO_BP	up
GO:0071479	cellular response to ionizing radiation	11/1210	72/28891	0.000192495	0.00366007	0.00268409	Cdkn1a/Hras/Ccnd2/Gadd45a/Rhob/Tmem109/Net1/Zmpste24/Xrcc5/Grb2/Gtf2h5	11	GO_BP	up
GO:0098869	cellular oxidant detoxification	7/1210	30/28891	0.000193787	0.00366362	0.00268669	Gpx2/Nqo1/Prdx2/Nfe2l2/Gsr/Selenot/Prdx1	7	GO_BP	up
GO:0060047	heart contraction	23/1210	239/28891	0.000194019	0.00366362	0.00268669	Stc1/Irx3/Gnao1/Rgs4/Atp1b1/Edn2/Grk2/Nedd4l/Tmem38a/Adrb1/Gsn/Scn1b/Gsk3a/S100a1/Atp1a1/Dsc2/Glrx3/Bin1/Zmpste24/Calm3/Calm1/Pebp1/Jup	23	GO_BP	up
GO:0034504	protein localization to nucleus	29/1210	335/28891	0.000197976	0.00371947	0.00272765	Cav2/Il33/Cdkn1a/Fyn/Grk2/Atp13a2/Six1/Notch1/Paf1/Cdk5/Prkcd/Sec13/Nfkbia/Lzts2/Ing1/Pttg1ip/Trim8/Sox9/Rrs1/Skp1/Glul/Dnajb6/Pin1/Ppp3r1/Tor1aip2/Tcf7l2/Akirin2/Jup/Hsp90ab1	29	GO_BP	up
GO:0014896	muscle hypertrophy	15/1210	123/28891	0.000199321	0.00371947	0.00272765	Rgs4/Trim63/Ece1/Sorbs2/Fbxo32/Adrb1/Gsn/Notch1/Becn1/Gsk3a/Pin1/Glrx3/Twf1/Mtpn/Ddx39b	15	GO_BP	up
GO:0048709	oligodendrocyte differentiation	15/1210	123/28891	0.000199321	0.00371947	0.00272765	Il33/Clu/Grk2/Nkx6-2/Mdk/Notch1/Hes1/Eif2b3/Eed/Cdk5/Sox9/Eif2b2/Hdac2/Tcf7l2/Nfix	15	GO_BP	up
GO:1901605	alpha-amino acid metabolic process	20/1210	194/28891	0.000199694	0.00371947	0.00272765	Cdo1/Arg2/Got1/Psph/Pycr2/Sephs2/Ucp2/Txnrd1/Aasdhppt/Gclc/Psat1/Glul/Pcmt1/Gfpt1/Qdpr/Atf4/Spr/Comt/Gclm/Hibadh	20	GO_BP	up
GO:0044091	membrane biogenesis	10/1210	61/28891	0.000206109	0.00382594	0.00280573	Cav2/Dmkn/Pex19/Chmp4c/Chmp1b/Chmp5/S100a10/Ubxn2a/Flot1/Nsfl1c	10	GO_BP	up
GO:0051047	positive regulation of secretion	35/1210	437/28891	0.000211047	0.00389519	0.00285651	Rab3a/Nppc/Edn2/Grk2/Rapgef4/Atp13a2/Rgcc/Nucb2/Ildr1/Lrp1/Capn10/Osbp/Serp1/Cdk5/Tsg101/Ier3ip1/Rab15/S100a10/Sox4/Sdc4/Rac1/Frmd4a/Prkar1a/Bsg/Glul/Arf6/Tmf1/Kif5b/Gna11/Mif/Nr1h2/Arf1/Tcf7l2/Selenot/Dynll1	35	GO_BP	up
GO:0006006	glucose metabolic process	22/1210	225/28891	0.000211262	0.00389519	0.00285651	Fbp2/Pdk4/Pgm1/Dusp12/Got1/Mdh2/Serp1/Kbtbd2/Ganc/Zfp692/Slc25a11/Gpd2/Kat2b/Gapdh/Adipor1/Zmpste24/Pdhb/Atf4/Nfe2l1/Tcf7l2/Dcxr/Arpp19	22	GO_BP	up
GO:0055074	calcium ion homeostasis	30/1210	353/28891	0.00021354	0.00392397	0.00287762	Stc1/Cav2/Atp1b1/Nppc/Edn2/Rmdn3/Stc2/Tmem38a/Atp13a2/Nucb2/Marcksl1/Cxcl10/Ubash3b/Maip1/Tmbim6/Cdk5/1600014C10Rik/Kcnh1/Stim2/Cx3cl1/Hexb/Bax/Calm3/Atf4/Ghitm/Calm1/Bcap31/Fis1/Fkbp1a/Selenok	30	GO_BP	up
GO:2000142	regulation of DNA-templated transcription initiation	12/1210	85/28891	0.000215544	0.00394755	0.00289491	Med31/Cebpa/Sub1/Nfkbia/Med30/Med7/Psmc6/Nfkb1/Med28/Taf10/Med19/Gtf2a2	12	GO_BP	up
GO:0042060	wound healing	31/1210	370/28891	0.000217396	0.0039682	0.00291006	Plat/Rab3a/Plet1/F3/Cdkn1a/Serpine2/Hras/Arhgap24/Fgf1/Tnfrsf12a/Cd9/Ubash3b/Bloc1s4/B4galt1/Prkcd/Map3k1/Chmp4c/Chmp1b/Chmp5/Pdia4/C1galt1c1/S100a10/Cx3cl1/Sdc4/Actg1/Prdx2/Nfe2l2/Cd151/Gas6/Anxa5/Fgfr1op2	31	GO_BP	up
GO:0046883	regulation of hormone secretion	29/1210	337/28891	0.000218919	0.00398273	0.00292071	Kcnj6/Gnao1/Edn2/Rapgef4/Pim3/Nucb2/Ildr1/Pick1/Lrp1/Capn10/Osbp/Serp1/Ucp2/Sox4/Hadh/Rac1/Prkar1a/Kdm5b/Glul/Hmgn3/Tmf1/Kif5b/Gna11/Ptpmt1/Anxa5/Tcf7l2/Selenot/Dynll1/Eny2	29	GO_BP	up
GO:0031400	negative regulation of protein modification process	37/1210	473/28891	0.000225147	0.00407615	0.00298922	Ocln/Cdkn1a/Fyn/Ppp1r16b/Grk2/Hspb1/Cdkn2c/Ubash3b/Trib1/Gadd45b/Cib1/Bag5/Gadd45a/Irf1/Akt1s1/Ppp5c/Cdk5/Prkcd/Socs1/Tsg101/Gclc/Dnajc3/Tiprl/Tmed2/Sox4/Zbed3/Kat2b/Prkar1a/Bex3/Bax/Ube2b/Gtpbp4/Hdac2/Cdkn1b/Pebp1/Hmg20b/Arpp19	37	GO_BP	up
GO:0007006	mitochondrial membrane organization	14/1210	111/28891	0.000225543	0.00407615	0.00298922	Dynlt1f/Maip1/Tomm40/Vdac2/Ier3/Dynlt1c/Gsk3a/Gclc/Slc25a46/Bax/Slc25a5/Ghitm/Sh3glb1/Micos13	14	GO_BP	up
GO:0097191	extrinsic apoptotic signaling pathway	23/1210	242/28891	0.000232806	0.00419357	0.00307533	Il33/Fyn/Tnfrsf12a/Dapk1/Ripk1/Hmgb2/Itm2c/Mllt11/Krt18/Casp8/Gsk3a/Gclc/Krt8/Ltbr/Cx3cl1/Il7/Prdx2/Bex3/Bax/Mcl1/Cttn/Gclm/Tcf7l2	23	GO_BP	up
GO:0046620	regulation of organ growth	15/1210	125/28891	0.000238423	0.00428067	0.0031392	Rgs4/Adrb1/Ccnd2/Notch1/Cited2/Serp1/Gsk3a/Ybx3/Il7/Pim1/Pin1/Hdac2/Vgll4/Tcf7l2/Ddx39b	15	GO_BP	up
GO:0072331	signal transduction by p53 class mediator	17/1210	153/28891	0.000241991	0.00432717	0.0031733	Cdkn1a/Nupr1/Aen/Eef1e1/Perp/Tmem109/Kmt5a/Pcbp4/Pttg1ip/Sox4/Rrs1/Bax/Mif/Zmpste24/Rps27l/Pak1ip1/Sh3glb1	17	GO_BP	up
GO:0021782	glial cell development	16/1210	139/28891	0.000243383	0.00432717	0.0031733	Clu/Nkx6-2/Hras/Pick1/Lrp1/Mdk/Eif2b3/Cdk5/Sox4/Slc25a46/Mapk3/Eif2b2/Ppp3r1/Tcf7l2/Nfix/Grb2	16	GO_BP	up
GO:0050684	regulation of mRNA processing	16/1210	139/28891	0.000243383	0.00432717	0.0031733	Celf4/Prpf19/Rbm20/Paf1/Malat1/Pcbp4/Rbm4/Leo1/Srsf10/Hnrnpl/Clns1a/Rbm7/Mbnl2/Srsf9/Puf60/Rbm47	16	GO_BP	up
GO:0008154	actin polymerization or depolymerization	20/1210	197/28891	0.000245097	0.00434354	0.00318531	Gm14137/Capg/Cdc42ep2/Fam107a/Fmn1/Gsn/Prkcd/Map3k1/Vasp/Arpc5/Rac1/Arf6/Bin1/Cttn/Twf1/Capzb/Grb2/Arpc5l/Arpc3/Mtpn	20	GO_BP	up
GO:1904029	regulation of cyclin-dependent protein kinase activity	11/1210	74/28891	0.000246697	0.00435778	0.00319575	Sfn/Cdkn1a/Rgcc/Ccnd2/Cdkn2c/Cdkn2d/Kat2b/Pim1/Gtpbp4/Cdkn1b/Hsp90ab1	11	GO_BP	up
GO:0061326	renal tubule development	14/1210	112/28891	0.000247987	0.00436649	0.00320214	Irx3/Cd24a/Pgf/Aqp11/Fgf1/Hey1/Jag1/Six1/Heyl/Fmn1/Notch1/Hes1/Lzts2/Sox9	14	GO_BP	up
GO:0032409	regulation of transporter activity	27/1210	307/28891	0.000251198	0.00440225	0.00322836	Atp1b1/Rgs9/Nherf1/Nedd4l/Stac/Adrb1/Dapk1/Ripk1/Pick1/Cox17/Fxyd3/Scn1b/Cdk5/Prkcd/Shisa6/Stk39/S100a1/Stim2/Ubqln1/1810037I17Rik/Atp1b3/Pim1/Kif5b/Calm3/Snx27/Calm1/Fkbp1a	27	GO_BP	up
GO:0019318	hexose metabolic process	24/1210	259/28891	0.000251853	0.00440225	0.00322836	Fbp2/Pdk4/Pgm1/Dusp12/Got1/Man2b1/Mdh2/Serp1/Kbtbd2/B4galt1/Ganc/Zfp692/Slc25a11/Gpd2/Kat2b/Gapdh/Adipor1/Zmpste24/Pdhb/Atf4/Nfe2l1/Tcf7l2/Dcxr/Arpp19	24	GO_BP	up
GO:0034101	erythrocyte homeostasis	18/1210	168/28891	0.000253914	0.00440225	0.00322836	Cd24a/Alas1/Dnase2a/Racgap1/Hmgb2/Zfp36/Cited2/Tcf3/Cebpg/Lyar/Sfxn1/Prmt1/Brd1/Slc25a5/Nfe2l1/Uba5/Prdx1/Smap1	18	GO_BP	up
GO:0071214	cellular response to abiotic stimulus	29/1210	340/28891	0.000254038	0.00440225	0.00322836	Aqp5/Efhd1/Rgs9/Cdkn1a/Hras/Got1/Ccnd2/Mmp2/Gadd45a/Rhob/Tmem109/H2ac25/Prkcd/Stk39/Net1/Ybx3/Sox9/Rac1/Atp1a1/Tmem87a/Rbx1/Trp53inp1/Bax/Gna11/Zmpste24/Xrcc5/Grb2/Gtf2h5/Eif2s1	29	GO_BP	up
GO:0104004	cellular response to environmental stimulus	29/1210	340/28891	0.000254038	0.00440225	0.00322836	Aqp5/Efhd1/Rgs9/Cdkn1a/Hras/Got1/Ccnd2/Mmp2/Gadd45a/Rhob/Tmem109/H2ac25/Prkcd/Stk39/Net1/Ybx3/Sox9/Rac1/Atp1a1/Tmem87a/Rbx1/Trp53inp1/Bax/Gna11/Zmpste24/Xrcc5/Grb2/Gtf2h5/Eif2s1	29	GO_BP	up
GO:0006906	vesicle fusion	15/1210	126/28891	0.000260341	0.00449725	0.00329803	Cav2/Rab3a/Atp13a2/Rab13/Chmp4c/Chmp1b/Chmp5/Rab20/Snapin/Uso1/Stx7/Kif5b/Stx11/Snap47/Stx6	15	GO_BP	up
GO:0035051	cardiocyte differentiation	20/1210	198/28891	0.000262122	0.00451377	0.00331014	Irx3/Rarb/Rgs4/Sorbs2/Nebl/Jag1/Adrb1/Ccnd2/Rara/Notch1/Hes1/Cited2/Gsk3a/Pdcd4/Pin1/Mapk3/Zmpste24/Hdac2/Ift20/Ddx39b	20	GO_BP	up
GO:0034111	negative regulation of homotypic cell-cell adhesion	5/1210	15/28891	0.00026995	0.00460512	0.00337714	Cd24a/Serpine2/Cd9/Ubash3b/Prkcd	5	GO_BP	up
GO:0048711	positive regulation of astrocyte differentiation	5/1210	15/28891	0.00026995	0.00460512	0.00337714	Serpine2/Prpf19/Notch1/Hes1/Bin1	5	GO_BP	up
GO:1904814	regulation of protein localization to chromosome, telomeric region	5/1210	15/28891	0.00026995	0.00460512	0.00337714	Cct7/Cct2/Tcp1/Cct6a/Cct8	5	GO_BP	up
GO:1903078	positive regulation of protein localization to plasma membrane	10/1210	63/28891	0.000270841	0.00460598	0.00337777	Dpp10/Pls1/Stac/Lrp1/Cib1/Ezr/Rer1/Arf6/Kif5b/Rab11a	10	GO_BP	up
GO:0009206	purine ribonucleoside triphosphate biosynthetic process	14/1210	113/28891	0.000272324	0.00461686	0.00338574	Ndufab1/Nudt2/Sdhb/Ndufa6/Ndufc2/Ndufc1/Ndufb9/Ndufs4/Atp5pb/Ndufa12/Ndufs5/Ndufa8/Ndufb8/Ndufb6	14	GO_BP	up
GO:0071322	cellular response to carbohydrate stimulus	18/1210	169/28891	0.000273271	0.00461862	0.00338704	Grk2/Pim3/Lrp1/Osbp/Ucp2/Rbm4/Sox4/Rac1/Nfkb1/Hmgn3/Ccdc186/Kif5b/Gas6/Ptpmt1/Tcf7l2/Selenot/Dynll1/Eny2	18	GO_BP	up
GO:0006913	nucleocytoplasmic transport	30/1210	359/28891	0.000284875	0.0047852	0.00350919	Il33/Sfn/Cdkn1a/Notch1/Cdk5/Ier3/Prkcd/Sec13/Nfkbia/Ing1/Pttg1ip/Rbm4/Chchd4/Mlx/Rab18/Eif4e/Ppp3r1/Thoc7/Gas6/Ranbp1/Cdkn1b/Sarnp/Ube2i/Anp32a/Akirin2/Jup/Hsp90ab1/Ddx39b/Eny2/Anp32b	30	GO_BP	up
GO:0051169	nuclear transport	30/1210	359/28891	0.000284875	0.0047852	0.00350919	Il33/Sfn/Cdkn1a/Notch1/Cdk5/Ier3/Prkcd/Sec13/Nfkbia/Ing1/Pttg1ip/Rbm4/Chchd4/Mlx/Rab18/Eif4e/Ppp3r1/Thoc7/Gas6/Ranbp1/Cdkn1b/Sarnp/Ube2i/Anp32a/Akirin2/Jup/Hsp90ab1/Ddx39b/Eny2/Anp32b	30	GO_BP	up
GO:0051900	regulation of mitochondrial depolarization	6/1210	23/28891	0.000291166	0.00486105	0.00356482	Dcn/Got1/Mllt11/Ppp2r3c/Gclc/Gclm	6	GO_BP	up
GO:0071218	cellular response to misfolded protein	6/1210	23/28891	0.000291166	0.00486105	0.00356482	Ufd1/Derl1/Rnf5/Rnf126/Stub1/Akirin2	6	GO_BP	up
GO:0060491	regulation of cell projection assembly	21/1210	215/28891	0.000295301	0.00489694	0.00359114	Gm14137/Cdc42ep2/Hras/Arhgap24/Rab3ip/Klf5/Prkcd/Rac1/Akirin1/Arf6/Rala/Mien1/Cttn/Ift20/Twf1/Atg3/Dynll1/Rab11a/Capzb/Septin7/Gdi2	21	GO_BP	up
GO:0006869	lipid transport	35/1210	445/28891	0.000296694	0.00489694	0.00359114	Ces1d/Crabp2/Ces1b/Selenom/Tmem30b/Atp8a2/Nucb2/Stard5/Slc25a21/Vldlr/Lrp1/Pla2g12a/Osbp/Prkcd/Slc25a17/Nfkbia/Stard10/Gltp/Slc25a11/Osbpl6/Kdm5b/Stard3nl/Prelid3b/Crot/Tmf1/Slc27a1/Mif/Hbp1/Nr1h2/Pltp/Vapa/Sar1b/Pitpnb/Fis1/Tmem30a	35	GO_BP	up
GO:0022898	regulation of transmembrane transporter activity	26/1210	294/28891	0.00029742	0.00489694	0.00359114	Atp1b1/Rgs9/Nherf1/Nedd4l/Stac/Adrb1/Dapk1/Ripk1/Pick1/Cox17/Fxyd3/Scn1b/Cdk5/Shisa6/Stk39/S100a1/Stim2/Ubqln1/1810037I17Rik/Atp1b3/Pim1/Kif5b/Calm3/Snx27/Calm1/Fkbp1a	26	GO_BP	up
GO:0006644	phospholipid metabolic process	30/1210	360/28891	0.00029863	0.00489694	0.00359114	Sgms2/Plppr1/Pla2g7/Pigf/Plcd4/Agpat3/Pla2g12a/Idh1/Serinc5/Chpt1/Gpcpd1/Osbp/Prkcd/Socs1/Becn1/Abhd12/Pip4k2c/Abhd5/Bpnt1/Cds1/Hexb/Abhd6/Impa1/Slc27a1/Ptpmt1/Nr1h2/Vapa/Arf1/Sh3glb1/Hadha	30	GO_BP	up
GO:0009145	purine nucleoside triphosphate biosynthetic process	14/1210	114/28891	0.000298681	0.00489694	0.00359114	Ndufab1/Nudt2/Sdhb/Ndufa6/Ndufc2/Ndufc1/Ndufb9/Ndufs4/Atp5pb/Ndufa12/Ndufs5/Ndufa8/Ndufb8/Ndufb6	14	GO_BP	up
GO:0048024	regulation of mRNA splicing, via spliceosome	14/1210	114/28891	0.000298681	0.00489694	0.00359114	Celf4/Prpf19/Rbm20/Malat1/Pcbp4/Rbm4/Srsf10/Hnrnpl/Clns1a/Rbm7/Mbnl2/Srsf9/Puf60/Rbm47	14	GO_BP	up
GO:0043620	regulation of DNA-templated transcription in response to stress	8/1210	42/28891	0.00030652	0.00499838	0.00366553	Ces1d/Tcim/Cebpb/Tmbim6/Cited2/Nfe2l2/Atf4/Nfe2l1	8	GO_BP	up
GO:0006584	catecholamine metabolic process	10/1210	64/28891	0.000309096	0.00499838	0.00366553	Sncb/Rtl4/Sncaip/Nr4a2/Aldh2/Pnkd/Ndufs4/Spr/Comt/Ly6e	10	GO_BP	up
GO:0009712	catechol-containing compound metabolic process	10/1210	64/28891	0.000309096	0.00499838	0.00366553	Sncb/Rtl4/Sncaip/Nr4a2/Aldh2/Pnkd/Ndufs4/Spr/Comt/Ly6e	10	GO_BP	up
GO:0048278	vesicle docking	10/1210	64/28891	0.000309096	0.00499838	0.00366553	Cav2/Gnao1/Rab3a/Rab13/Exoc7/Uso1/Stx7/Stx11/Stx6/Ralb	10	GO_BP	up
GO:0090174	organelle membrane fusion	15/1210	128/28891	0.000309432	0.00499838	0.00366553	Cav2/Rab3a/Atp13a2/Rab13/Chmp4c/Chmp1b/Chmp5/Rab20/Snapin/Uso1/Stx7/Kif5b/Stx11/Snap47/Stx6	15	GO_BP	up
GO:0032434	regulation of proteasomal ubiquitin-dependent protein catabolic process	16/1210	142/28891	0.00031082	0.00500105	0.00366749	Il33/Clu/Plk2/Trib2/Trib1/Gipc1/Bag5/Gsk3a/Gclc/Ubqln1/Dda1/Stub1/Rbx1/Csnk1e/Bcap31/Csnk1a1	16	GO_BP	up
GO:0000380	alternative mRNA splicing, via spliceosome	11/1210	76/28891	0.000313251	0.00500105	0.00366749	Celf4/Rbm20/Malat1/Rbm4/Scnm1/Hnrnpl/Rbm7/Mbnl2/Srsf9/Puf60/Rbm47	11	GO_BP	up
GO:0051926	negative regulation of calcium ion transport	11/1210	76/28891	0.000313251	0.00500105	0.00366749	Stc1/Gnao1/Tmbim6/Hes1/Vdac1/Ubqln1/1810037I17Rik/Ppp3r1/Bin1/Calm3/Calm1	11	GO_BP	up
GO:0060260	regulation of transcription initiation by RNA polymerase II	11/1210	76/28891	0.000313251	0.00500105	0.00366749	Med31/Sub1/Nfkbia/Med30/Med7/Psmc6/Nfkb1/Med28/Taf10/Med19/Gtf2a2	11	GO_BP	up
GO:0048284	organelle fusion	18/1210	171/28891	0.00031587	0.00502821	0.00368741	Cav2/Rab3a/Atp13a2/Rab13/Chmp4c/Chmp1b/Chmp5/Rab20/Snapin/Uso1/Stx7/Kif5b/Stx11/Bax/Snap47/Mcl1/Stx6/Fis1	18	GO_BP	up
GO:0034766	negative regulation of monoatomic ion transmembrane transport	14/1210	115/28891	0.000327195	0.00519339	0.00380854	Rgs4/Nherf1/Nedd4l/Tmbim6/Stk39/Vdac1/Ubqln1/1810037I17Rik/Ppp3r1/Bin1/Calm3/Snx27/Calm1/Iscu	14	GO_BP	up
GO:0048738	cardiac muscle tissue development	25/1210	280/28891	0.000333529	0.00526566	0.00386154	Irx3/Rarb/Rgs4/Sorbs2/Fgf1/Nebl/Hey1/Adrb1/Ccnd2/Rara/Notch1/Cited2/Casp8/Gsk3a/Prkar1a/Pim1/Prmt1/Pin1/Zmpste24/Hdac2/Vgll4/Ift20/Ly6e/Ddx39b/Fkbp1a	25	GO_BP	up
GO:0014855	striated muscle cell proliferation	12/1210	89/28891	0.000333672	0.00526566	0.00386154	Cav2/Fgf1/Six1/Ccnd2/Notch1/Cited2/Prkar1a/Akirin1/Pim1/Hdac2/Vgll4/Sugt1	12	GO_BP	up
GO:0009308	amine metabolic process	15/1210	129/28891	0.000336829	0.00528503	0.00387575	Sncb/Rtl4/Sncaip/Smox/Nr4a2/Aldh2/Dhps/Sms/Pnkd/Ndufs4/Spr/Comt/Oaz1/Pebp1/Ly6e	15	GO_BP	up
GO:0032414	positive regulation of ion transmembrane transporter activity	15/1210	129/28891	0.000336829	0.00528503	0.00387575	Atp1b1/Rgs9/Nedd4l/Stac/Adrb1/Cox17/Scn1b/Cdk5/Stk39/S100a1/Stim2/Atp1b3/Kif5b/Calm3/Calm1	15	GO_BP	up
GO:0006813	potassium ion transport	23/1210	249/28891	0.000350959	0.005491	0.00402679	Kcnj6/Cxcl1/Kcnk1/Rgs4/Atp1b1/Dpp10/Nedd4l/Tmem38a/Pick1/Fxyd3/Gnb2/Stk39/Kcnh1/Atp1a1/Atp1b3/Kif5b/Cpox/Bin1/Hbp1/Atf4/Ghitm/Cdkn1b/Snx27	23	GO_BP	up
GO:0032368	regulation of lipid transport	17/1210	158/28891	0.000354494	0.0055148	0.00404425	Ces1d/Ces1b/Atp8a2/Nucb2/Lrp1/Prkcd/Nfkbia/Osbpl6/Kdm5b/Tmf1/Mif/Hbp1/Nr1h2/Pltp/Sar1b/Fis1/Tmem30a	17	GO_BP	up
GO:0071333	cellular response to glucose stimulus	17/1210	158/28891	0.000354494	0.0055148	0.00404425	Grk2/Pim3/Lrp1/Osbp/Ucp2/Rbm4/Sox4/Rac1/Hmgn3/Ccdc186/Kif5b/Gas6/Ptpmt1/Tcf7l2/Selenot/Dynll1/Eny2	17	GO_BP	up
GO:0043266	regulation of potassium ion transport	14/1210	116/28891	0.000358006	0.00553797	0.00406124	Cxcl1/Rgs4/Atp1b1/Dpp10/Nedd4l/Pick1/Gnb2/Stk39/Atp1b3/Kif5b/Bin1/Hbp1/Atf4/Snx27	14	GO_BP	up
GO:0055017	cardiac muscle tissue growth	14/1210	116/28891	0.000358006	0.00553797	0.00406124	Rgs4/Sorbs2/Fgf1/Adrb1/Ccnd2/Notch1/Cited2/Gsk3a/Prkar1a/Pim1/Pin1/Hdac2/Vgll4/Ddx39b	14	GO_BP	up
GO:0032212	positive regulation of telomere maintenance via telomerase	7/1210	33/28891	0.000364408	0.00562112	0.00412221	Cct7/Mapk3/Cct2/Tcp1/Xrcc5/Cct6a/Cct8	7	GO_BP	up
GO:0006942	regulation of striated muscle contraction	12/1210	90/28891	0.000370556	0.00568133	0.00416637	Stc1/Arg2/Atp1b1/Grk2/Tmem38a/Adrb1/Atp1a1/Dsc2/Bin1/Calm3/Calm1/Jup	12	GO_BP	up
GO:0010632	regulation of epithelial cell migration	23/1210	250/28891	0.000371545	0.00568133	0.00416637	Stc1/Rab25/Plk2/Dcn/Hspb1/Rgcc/Fgf1/Notch1/Cib1/Gadd45a/Rhob/Sox9/Rac1/Gfus/Csnk2b/Bsg/Glul/Nfe2l2/Arf6/Adipor1/Col18a1/Jup/Rab11a	23	GO_BP	up
GO:0019058	viral life cycle	23/1210	250/28891	0.000371545	0.00568133	0.00416637	Cav2/Tmprss2/Grk2/Nectin2/Isg20/Gsn/Notch1/Zfp639/Tsg101/Chmp4c/Chmp1b/Slc3a2/Chmp5/Trim8/Snx3/Csnk2b/Bsg/Rnasek/Pcbp1/Gas6/P4hb/Vapa/Ly6e	23	GO_BP	up
GO:0071709	membrane assembly	9/1210	54/28891	0.000373884	0.00568133	0.00416637	Cav2/Dmkn/Chmp4c/Chmp1b/Chmp5/S100a10/Ubxn2a/Flot1/Nsfl1c	9	GO_BP	up
GO:0019076	viral release from host cell	6/1210	24/28891	0.000374536	0.00568133	0.00416637	Cav2/Tsg101/Chmp4c/Chmp1b/Chmp5/Vapa	6	GO_BP	up
GO:0035891	exit from host cell	6/1210	24/28891	0.000374536	0.00568133	0.00416637	Cav2/Tsg101/Chmp4c/Chmp1b/Chmp5/Vapa	6	GO_BP	up
GO:0007162	negative regulation of cell adhesion	27/1210	315/28891	0.00037757	0.00568822	0.00417142	Dapl1/Cd24a/Arg2/Plet1/Nrarp/Serpine2/Hspb1/Rgcc/Fam107a/Cd274/Cd9/Jag1/Cebpb/Lrp1/Ubash3b/Mdk/Notch1/Mmp2/Irf1/Prkcd/Socs1/Lamb1/Sdc4/Prkar1a/Prdx2/Epcam/Gtpbp4	27	GO_BP	up
GO:0019184	nonribosomal peptide biosynthetic process	5/1210	16/28891	0.000379145	0.00568822	0.00417142	Bdh2/Hagh/Gclc/Nfe2l2/Gclm	5	GO_BP	up
GO:0032511	late endosome to vacuole transport via multivesicular body sorting pathway	5/1210	16/28891	0.000379145	0.00568822	0.00417142	Vps36/Vta1/Chmp4c/Chmp5/Leprotl1	5	GO_BP	up
GO:0110096	cellular response to aldehyde	5/1210	16/28891	0.000379145	0.00568822	0.00417142	Aldh2/Sgk1/Akr1a1/Esd/Adh5	5	GO_BP	up
GO:0031331	positive regulation of cellular catabolic process	29/1210	349/28891	0.000391282	0.00585426	0.00429319	Plk2/Dcn/Dapk1/Noct/Pnpla2/Zfp36/Polr2g/Hspb8/Btg2/Prkcd/Becn1/Gsk3a/Vdac1/Pip4k2c/Trim8/Abhd5/Ttc5/Kat2b/Scoc/Mlx/Mapk3/Trp53inp1/Bax/Tmem59/Slc25a5/Cnot6/Sh3glb1/Lsm1/Ralb	29	GO_BP	up
GO:1903322	positive regulation of protein modification by small protein conjugation or removal	16/1210	145/28891	0.000393813	0.00587607	0.00430918	Fam107a/Trib2/Trib1/Arrdc3/Gsk3a/Aimp2/Derl1/Pttg1ip/Ubqln1/Skp1/Pin1/Stub1/Rbx1/Hspa5/Ube2n/Ube2l3	16	GO_BP	up
GO:0071331	cellular response to hexose stimulus	17/1210	160/28891	0.000410791	0.006067	0.0044492	Grk2/Pim3/Lrp1/Osbp/Ucp2/Rbm4/Sox4/Rac1/Hmgn3/Ccdc186/Kif5b/Gas6/Ptpmt1/Tcf7l2/Selenot/Dynll1/Eny2	17	GO_BP	up
GO:0000422	autophagy of mitochondrion	12/1210	91/28891	0.000410828	0.006067	0.0044492	Capn10/Becn1/Gsk3a/Map1lc3a/Vdac1/Gabarapl2/Slc25a46/Fundc1/Slc25a5/Cttn/Atg3/Fis1	12	GO_BP	up
GO:0061726	mitochondrion disassembly	12/1210	91/28891	0.000410828	0.006067	0.0044492	Capn10/Becn1/Gsk3a/Map1lc3a/Vdac1/Gabarapl2/Slc25a46/Fundc1/Slc25a5/Cttn/Atg3/Fis1	12	GO_BP	up
GO:0048872	homeostasis of number of cells	32/1210	401/28891	0.00041104	0.006067	0.0044492	Cd24a/Bmi1/Alas1/Dnase2a/Polb/Racgap1/Hmgb2/Notch1/Zfp36/Cited2/Tuba1a/Ppp2r3c/Sox4/Sox9/Tcf3/Rac1/Il7/Cebpg/Lyar/Prdx2/Sfxn1/Prmt1/Brd1/Prdx5/Bax/Mif/Slc25a5/Nfe2l1/Uba5/Prdx1/Nfix/Smap1	32	GO_BP	up
GO:1905952	regulation of lipid localization	19/1210	190/28891	0.0004189	0.00616638	0.00452208	Ces1d/Ces1b/Atp8a2/Nucb2/Lrp1/Pnpla2/Prkcd/Nfkbia/Abhd5/Osbpl6/Kdm5b/Tmf1/Mif/Hbp1/Nr1h2/Pltp/Sar1b/Fis1/Tmem30a	19	GO_BP	up
GO:0048732	gland development	37/1210	489/28891	0.00042637	0.00619183	0.00454074	Cdo1/Aldh1a3/Tfcp2l1/Irf6/Serpine2/Nherf1/Fgf1/Upb1/Elf3/Cebpb/Polb/Six1/Mdk/Notch1/Lmo4/Hes1/Mmp2/Cebpa/Lsr/Cited2/Fkbp4/Serpinb5/Adrm1/Sox9/Usf2/Kdm5b/Nfkb1/Prdx2/Arf6/Mapk3/Bax/Zmpste24/Taf10/Pax1/Cdkn1b/Tcf7l2/Ly6e	37	GO_BP	up
GO:0014706	striated muscle tissue development	26/1210	301/28891	0.000426879	0.00619183	0.00454074	Irx3/Rarb/Rgs4/Sorbs2/Fgf1/Nebl/Hey1/Adrb1/Ccnd2/Rara/Notch1/Cited2/Casp8/Gsk3a/Ifrd1/Prkar1a/Pim1/Prmt1/Pin1/Zmpste24/Hdac2/Vgll4/Ift20/Ly6e/Ddx39b/Fkbp1a	26	GO_BP	up
GO:0009201	ribonucleoside triphosphate biosynthetic process	14/1210	118/28891	0.000427124	0.00619183	0.00454074	Ndufab1/Nudt2/Sdhb/Ndufa6/Ndufc2/Ndufc1/Ndufb9/Ndufs4/Atp5pb/Ndufa12/Ndufs5/Ndufa8/Ndufb8/Ndufb6	14	GO_BP	up
GO:0010613	positive regulation of cardiac muscle hypertrophy	8/1210	44/28891	0.000427413	0.00619183	0.00454074	Ece1/Adrb1/Gsn/Becn1/Pin1/Twf1/Mtpn/Ddx39b	8	GO_BP	up
GO:0034314	Arp2/3 complex-mediated actin nucleation	8/1210	44/28891	0.000427413	0.00619183	0.00454074	Pick1/Arpc5/Arpc1b/Arpc1a/Rnh1/Arf1/Arpc5l/Arpc3	8	GO_BP	up
GO:0051438	regulation of ubiquitin-protein transferase activity	8/1210	44/28891	0.000427413	0.00619183	0.00454074	Trib2/Trib1/Arrdc3/Bag5/Skp1/Pin1/Stub1/Ube2l3	8	GO_BP	up
GO:0097352	autophagosome maturation	9/1210	55/28891	0.000430619	0.00622182	0.00456273	Becn1/Chmp4c/Chmp1b/Chmp5/Map1lc3a/Ubqln1/Snapin/Calm1/Lamp2	9	GO_BP	up
GO:1905897	regulation of response to endoplasmic reticulum stress	11/1210	79/28891	0.000441005	0.00634229	0.00465108	Clu/Nupr1/Aqp11/Selenos/Manf/Tmbim6/Ubqln1/Bax/Nr1h2/Nfe2l1/Bcap31	11	GO_BP	up
GO:0071326	cellular response to monosaccharide stimulus	17/1210	161/28891	0.000441722	0.00634229	0.00465108	Grk2/Pim3/Lrp1/Osbp/Ucp2/Rbm4/Sox4/Rac1/Hmgn3/Ccdc186/Kif5b/Gas6/Ptpmt1/Tcf7l2/Selenot/Dynll1/Eny2	17	GO_BP	up
GO:0097345	mitochondrial outer membrane permeabilization	7/1210	34/28891	0.000442432	0.00634229	0.00465108	Vdac2/Ier3/Gsk3a/Gclc/Bax/Slc25a5/Sh3glb1	7	GO_BP	up
GO:0065004	protein-DNA complex assembly	18/1210	176/28891	0.000448453	0.00639513	0.00468983	H3c15/H1f2/Med31/H3f3b/Nap1l4/Gtf2b/Med30/Med7/Sox9/Psmc6/Med28/Taf10/Med19/Gtf2a2/Set/Sugt1/Gtf2h5/Anp32b	18	GO_BP	up
GO:1904064	positive regulation of cation transmembrane transport	18/1210	176/28891	0.000448453	0.00639513	0.00468983	Atp1b1/Prss8/Nedd4l/Stac/Cxcl10/Adrb1/Scn1b/Cdk5/S100a1/Stim2/Cx3cl1/Atp1b3/Kif5b/Ppp3r1/Bax/Calm3/Arf1/Calm1	18	GO_BP	up
GO:1905517	macrophage migration	10/1210	67/28891	0.000451877	0.00642722	0.00471336	Edn2/Cd81/Cd9/Mdk/Mmp2/B4galt1/Cx3cl1/Akirin1/Mapk3/Mif	10	GO_BP	up
GO:0051881	regulation of mitochondrial membrane potential	12/1210	92/28891	0.000454732	0.00645107	0.00473085	Dcn/Got1/Mllt11/Ucp2/Ppp2r3c/Gclc/Arl6ip5/Ndufc2/Bax/Ndufs4/Gclm/Dynll1	12	GO_BP	up
GO:0016197	endosomal transport	22/1210	238/28891	0.000462074	0.00653614	0.00479324	Rab13/Arl4c/Vps36/Vps26c/Plekhj1/Vta1/Tbc1d10a/Rab6a/Chmp4c/Chmp1b/Chmp5/Rnf126/Snx3/Tmem87a/Leprotl1/Arf6/Snx5/Dpy30/Stx6/Snx27/Rab11a/Vps29	22	GO_BP	up
GO:0099003	vesicle-mediated transport in synapse	24/1210	270/28891	0.000463116	0.00653614	0.00479324	Sncb/Cd24a/Rab3a/Rapgef4/Necap1/Pick1/Atp6v1e1/Atp6v1g1/Napa/Cdk5/Kcnh1/Snapin/Actg1/Sh3glb2/Arf6/Atp6v1d/Ppp3r1/Stx11/Bin1/Snap47/Rala/Rab11a/Atp6v1f/Ap2s1	24	GO_BP	up
GO:1903052	positive regulation of proteolysis involved in protein catabolic process	15/1210	133/28891	0.000468278	0.00659201	0.00483421	Il33/Clu/Plk2/Nupr1/Trib2/Trib1/Gsk3a/Gclc/Ubqln1/Dda1/Stub1/Rbx1/Csnk1e/Bcap31/Csnk1a1	15	GO_BP	up
GO:1902307	positive regulation of sodium ion transmembrane transport	6/1210	25/28891	0.000475454	0.00667586	0.0048957	Atp1b1/Prss8/Scn1b/Atp1b3/Kif5b/Arf1	6	GO_BP	up
GO:0010594	regulation of endothelial cell migration	18/1210	177/28891	0.000480083	0.00672362	0.00493072	Stc1/Plk2/Dcn/Hspb1/Rgcc/Fgf1/Notch1/Cib1/Gadd45a/Rhob/Rac1/Gfus/Csnk2b/Bsg/Glul/Nfe2l2/Col18a1/Jup	18	GO_BP	up
GO:0065002	intracellular protein transmembrane transport	9/1210	56/28891	0.000494246	0.00690432	0.00506324	Timm17a/Tomm40/Sec61b/Pam16/Tomm20/Chchd4/Hspa5/Hspd1/Grpel1	9	GO_BP	up
GO:0014742	positive regulation of muscle hypertrophy	8/1210	45/28891	0.000500947	0.00698012	0.00511883	Ece1/Adrb1/Gsn/Becn1/Pin1/Twf1/Mtpn/Ddx39b	8	GO_BP	up
GO:0072009	nephron epithelium development	14/1210	120/28891	0.000507308	0.00705081	0.00517067	Irx3/Cd24a/Pgf/Aqp11/Fgf1/Hey1/Jag1/Six1/Heyl/Fmn1/Notch1/Hes1/Lzts2/Sox9	14	GO_BP	up
GO:0051650	establishment of vesicle localization	19/1210	193/28891	0.000509124	0.00705489	0.00517366	Rab3a/Atp13a2/Bloc1s4/Trappc6b/Exoc7/Cdk5/Tsg101/Trappc2/Sdc4/Trappc4/Snapin/Stard3nl/Trappc2l/Ccdc186/Kif5b/Sar1b/Arf1/Tmem230/Rab11a	19	GO_BP	up
GO:0043903	regulation of biological process involved in symbiotic interaction	10/1210	68/28891	0.000510179	0.00705489	0.00517366	Cxcl1/Tmprss2/Nectin2/Gsn/Exoc7/Trim8/Snx3/Bsg/P4hb/Ly6e	10	GO_BP	up
GO:1901875	positive regulation of post-translational protein modification	18/1210	178/28891	0.000513621	0.00708461	0.00519545	Fam107a/Trib2/Trib1/Arrdc3/Eed/Gsk3a/Aimp2/Kat8/Derl1/Pttg1ip/Ubqln1/Skp1/Pin1/Stub1/Rbx1/Hspa5/Ube2n/Ube2l3	18	GO_BP	up
GO:2000116	regulation of cysteine-type endopeptidase activity	22/1210	240/28891	0.000517809	0.0071183	0.00522016	Sfn/F3/Fyn/Grk2/Dapk1/Gsn/Perp/Cdkn2d/Casp8/Tbc1d10a/Cycs/Ctsd/Arl6ip5/Dnajb6/Gas6/Bax/Rps27l/Hspd1/Bcap31/Fis1/Anp32b/Rnf7	22	GO_BP	up
GO:0009226	nucleotide-sugar biosynthetic process	5/1210	17/28891	0.000518664	0.0071183	0.00522016	Uap1/Ugdh/Gfus/Gfpt1/Gnpda2	5	GO_BP	up
GO:0090331	negative regulation of platelet aggregation	4/1210	10/28891	0.000524867	0.00716751	0.00525625	Serpine2/Cd9/Ubash3b/Prkcd	4	GO_BP	up
GO:0110095	cellular detoxification of aldehyde	4/1210	10/28891	0.000524867	0.00716751	0.00525625	Aldh2/Akr1a1/Esd/Adh5	4	GO_BP	up
GO:0042254	ribosome biogenesis	27/1210	322/28891	0.00053109	0.00723445	0.00530534	Isg20/Pop7/Brix1/Tsr3/Mrto4/Gnl2/Kat2b/Lyar/Rrs1/Glul/Utp11/Mrpl20/Rrp1/Eif5/Gtpbp4/Pa2g4/Rps27l/Pak1ip1/Rps19bp1/Xrcc5/Fcf1/Rplp0/Rps11/Imp3/Ebna1bp2/Mrps7/Gtf2h5	27	GO_BP	up
GO:0051235	maintenance of location	30/1210	373/28891	0.000539224	0.00732702	0.00537322	Bdh2/Ces1d/Ces1b/Grk2/Smim22/Tmem38a/Cxcl10/Ubash3b/Gsn/Pnpla2/Kdelr2/Cdk5/Nfkbia/Get4/Rer1/Sqle/Tmed2/Abhd5/Cx3cl1/Skp1/Cds1/Hexb/Hspa5/Bax/Calm3/Nr1h2/Ghitm/Twf1/Calm1/Fkbp1a	30	GO_BP	up
GO:0016055	Wnt signaling pathway	35/1210	460/28891	0.00054411	0.00736854	0.00540367	Nrarp/Ndrg2/Nherf1/Shisa2/Tbl1xr1/Lrp1/Mdk/Notch1/Paf1/Map3k1/Shisa6/Gsk3a/Lzts2/Sox4/Leo1/Sox9/Rac1/Zbed3/Snx3/Nfkb1/Csnk2b/Calcoco1/Pin1/Ube2b/Csnk1e/Hbp1/Hdac2/Vgll4/Ift20/Tcf7l2/Ruvbl1/Jup/Csnk2a1/Atp6v0c/Csnk1a1	35	GO_BP	up
GO:0016054	organic acid catabolic process	22/1210	241/28891	0.000547808	0.00736854	0.00540367	Bdh2/Ces1d/Cdo1/Arg2/Cryl1/Got1/Auh/Slc25a17/Aasdhppt/Hadh/Etfa/Hexb/Eci1/Crot/Hadhb/Qdpr/Akr1a1/Dcxr/Hadha/Echs1/Gnpda2/Hibadh	22	GO_BP	up
GO:0046395	carboxylic acid catabolic process	22/1210	241/28891	0.000547808	0.00736854	0.00540367	Bdh2/Ces1d/Cdo1/Arg2/Cryl1/Got1/Auh/Slc25a17/Aasdhppt/Hadh/Etfa/Hexb/Eci1/Crot/Hadhb/Qdpr/Akr1a1/Dcxr/Hadha/Echs1/Gnpda2/Hibadh	22	GO_BP	up
GO:0006626	protein targeting to mitochondrion	11/1210	81/28891	0.000548379	0.00736854	0.00540367	Timm17a/Pmpcb/Tomm40/Gsk3a/Pam16/Tomm20/Chchd4/Hspd1/Grpel1/Bcap31/Fis1	11	GO_BP	up
GO:0043500	muscle adaptation	15/1210	135/28891	0.000549007	0.00736854	0.00540367	Rgs4/Trim63/Ece1/Fbxo32/Adrb1/Gsn/Notch1/Becn1/Gsk3a/Pin1/Glrx3/Ndufs4/Twf1/Mtpn/Ddx39b	15	GO_BP	up
GO:0006397	mRNA processing	37/1210	496/28891	0.000556267	0.00744772	0.00546174	Celf4/Prpf19/Lsm8/Snrpa1/Rbm20/Lsm3/Zcrb1/Snrnp27/Paf1/Malat1/Pcbp4/Rbm4/Dnajc17/Leo1/Sf3b6/U2af1l4/Pcbp1/Scnm1/Srsf10/Hnrnpl/Thoc7/Clns1a/Wbp4/Ramac/Cwc15/Rbm7/Mbnl2/Syf2/Srsf9/Lsm1/Puf60/Snrpc/Snrpa/Cript/Rbm47/Ddx39b/Snrpd3	37	GO_BP	up
GO:0000381	regulation of alternative mRNA splicing, via spliceosome	9/1210	57/28891	0.000565386	0.00755136	0.00553774	Celf4/Rbm20/Malat1/Rbm4/Hnrnpl/Rbm7/Mbnl2/Puf60/Rbm47	9	GO_BP	up
GO:0050678	regulation of epithelial cell proliferation	33/1210	426/28891	0.000567457	0.00756057	0.00554449	Cav2/Pgf/Sfn/F3/Nrarp/Ppp1r16b/Nupr1/Irf6/Aqp11/Hras/Rgcc/Fgf1/Hey1/Jag1/Six1/Hmgb2/Ccnd2/Mdk/Notch1/Hes1/Zfp36/B4galt1/Serpinb5/Pdcl3/Sox9/Ctsl/Kdm5b/Glul/Nras/Bax/Col18a1/Cdkn1b/Tcf7l2	33	GO_BP	up
GO:0007032	endosome organization	10/1210	69/28891	0.000574576	0.00761858	0.00558704	Aqp11/Plekhj1/Chmp4c/Chmp1b/Plekhf2/Chmp5/Snx3/Rnasek/Stx6/Rab11a	10	GO_BP	up
GO:0048144	fibroblast proliferation	16/1210	150/28891	0.000574594	0.00761858	0.00558704	Cdkn1a/Grk2/Nupr1/Hras/Cks1b/Med31/Socs1/Lzts2/Trp53inp1/Nras/Gas6/Bax/Mif/Zmpste24/Ndufs4/Prdx1	16	GO_BP	up
GO:0198738	cell-cell signaling by wnt	35/1210	462/28891	0.000588137	0.00777932	0.00570492	Nrarp/Ndrg2/Nherf1/Shisa2/Tbl1xr1/Lrp1/Mdk/Notch1/Paf1/Map3k1/Shisa6/Gsk3a/Lzts2/Sox4/Leo1/Sox9/Rac1/Zbed3/Snx3/Nfkb1/Csnk2b/Calcoco1/Pin1/Ube2b/Csnk1e/Hbp1/Hdac2/Vgll4/Ift20/Tcf7l2/Ruvbl1/Jup/Csnk2a1/Atp6v0c/Csnk1a1	35	GO_BP	up
GO:0003417	growth plate cartilage development	6/1210	26/28891	0.000596339	0.00783106	0.00574286	Stc1/Rarb/Nppc/Rara/Sox9/Zmpste24	6	GO_BP	up
GO:0030970	retrograde protein transport, ER to cytosol	6/1210	26/28891	0.000596339	0.00783106	0.00574286	Selenos/Ufd1/Derl1/Sec61b/Faf2/Bcap31	6	GO_BP	up
GO:1903513	endoplasmic reticulum to cytosol transport	6/1210	26/28891	0.000596339	0.00783106	0.00574286	Selenos/Ufd1/Derl1/Sec61b/Faf2/Bcap31	6	GO_BP	up
GO:0120032	regulation of plasma membrane bounded cell projection assembly	20/1210	212/28891	0.000634566	0.00831311	0.00609637	Gm14137/Cdc42ep2/Hras/Arhgap24/Rab3ip/Klf5/Prkcd/Rac1/Akirin1/Arf6/Rala/Mien1/Ift20/Twf1/Atg3/Dynll1/Rab11a/Capzb/Septin7/Gdi2	20	GO_BP	up
GO:0009069	serine family amino acid metabolic process	7/1210	36/28891	0.000638234	0.00831772	0.00609974	Cdo1/Psph/Sephs2/Txnrd1/Gclc/Psat1/Gclm	7	GO_BP	up
GO:0008286	insulin receptor signaling pathway	15/1210	137/28891	0.000641317	0.00831772	0.00609974	Cav2/Ptpre/Pdk4/Hras/Nucb2/Prkcd/Socs1/Gsk3a/Rbm4/Pip4k2c/Ctsd/Mapk3/Adipor1/Snx5/Grb2	15	GO_BP	up
GO:0043393	regulation of protein binding	21/1210	228/28891	0.000644609	0.00831772	0.00609974	Grem2/Cdkn1a/Plk2/Lrp1/Ubash3b/Tmbim6/Ppp1r2/Cdk5/Cycs/Derl1/Psme3ip1/Tmed2/Snapin/Pin1/Stub1/Mapk3/Flot1/Bax/Tcf7l2/Ralb/Hsp90ab1	21	GO_BP	up
GO:0045687	positive regulation of glial cell differentiation	9/1210	58/28891	0.000644694	0.00831772	0.00609974	Il33/Serpine2/Nkx6-2/Prpf19/Mdk/Notch1/Hes1/Bin1/Hdac2	9	GO_BP	up
GO:0048538	thymus development	9/1210	58/28891	0.000644694	0.00831772	0.00609974	Six1/Lmo4/Hes1/Cited2/Adrm1/Prdx2/Mapk3/Zmpste24/Pax1	9	GO_BP	up
GO:0052372	modulation by symbiont of entry into host	9/1210	58/28891	0.000644694	0.00831772	0.00609974	Tmprss2/Nectin2/Gsn/Exoc7/Trim8/Snx3/Bsg/P4hb/Ly6e	9	GO_BP	up
GO:0000079	regulation of cyclin-dependent protein serine/threonine kinase activity	10/1210	70/28891	0.00064555	0.00831772	0.00609974	Sfn/Cdkn1a/Rgcc/Ccnd2/Cdkn2c/Cdkn2d/Kat2b/Pim1/Gtpbp4/Cdkn1b	10	GO_BP	up
GO:0006413	translational initiation	14/1210	123/28891	0.000651403	0.00837344	0.00614061	Eif2b3/Polr2g/Eif2s2/Dnajc3/Rbm4/Tmed2/Eif4a1/Eif4e/Eif2b2/Eif5/Eif3l/Eif3k/Paip2/Eif2s1	14	GO_BP	up
GO:0051099	positive regulation of binding	19/1210	197/28891	0.000655253	0.0084032	0.00616243	Plk2/Hmgb2/Lrp1/Rara/Hes1/Cdk5/Derl1/Gtf2b/Tmed2/S100a10/Kat2b/Pin1/Flot1/Tcf7l2/Calm1/Ralb/Hsp90ab1/Edf1/Eif2s1	19	GO_BP	up
GO:0003382	epithelial cell morphogenesis	8/1210	47/28891	0.000678727	0.0086839	0.00636828	Stc1/Rab25/Cgn/Map3k1/St14/Rac1/Clic4/Col18a1	8	GO_BP	up
GO:0072329	monocarboxylic acid catabolic process	15/1210	138/28891	0.00069222	0.00881111	0.00646157	Bdh2/Ces1d/Cryl1/Auh/Slc25a17/Hadh/Etfa/Hexb/Eci1/Crot/Hadhb/Akr1a1/Dcxr/Hadha/Echs1	15	GO_BP	up
GO:0030011	maintenance of cell polarity	5/1210	18/28891	0.000693497	0.00881111	0.00646157	Nherf1/Arpc5/Pdlim1/Pdzd11/Lin7c	5	GO_BP	up
GO:1903729	regulation of plasma membrane organization	5/1210	18/28891	0.000693497	0.00881111	0.00646157	Rab3a/Gsn/Prkcd/S100a10/Sh3glb1	5	GO_BP	up
GO:0016042	lipid catabolic process	28/1210	345/28891	0.000706036	0.00893548	0.00655278	Bdh2/Ces1d/Ces1b/Pla2g7/Srd5a1/Hpgd/Plcd4/Tbl1xr1/Lrp1/Pla2g12a/Idh1/Pafah1b3/Auh/Gpcpd1/Pnpla2/Prkcd/Slc25a17/Abhd12/Abhd5/Hadh/Etfa/Hexb/Eci1/Crot/Abhd6/Hadhb/Hadha/Echs1	28	GO_BP	up
GO:0009142	nucleoside triphosphate biosynthetic process	14/1210	124/28891	0.000706549	0.00893548	0.00655278	Ndufab1/Nudt2/Sdhb/Ndufa6/Ndufc2/Ndufc1/Ndufb9/Ndufs4/Atp5pb/Ndufa12/Ndufs5/Ndufa8/Ndufb8/Ndufb6	14	GO_BP	up
GO:2001259	positive regulation of cation channel activity	10/1210	71/28891	0.000723604	0.00913008	0.00669548	Nedd4l/Stac/Adrb1/Scn1b/Cdk5/S100a1/Stim2/Kif5b/Calm3/Calm1	10	GO_BP	up
GO:0051123	RNA polymerase II preinitiation complex assembly	9/1210	59/28891	0.000732859	0.0092256	0.00676554	Med31/Gtf2b/Med30/Med7/Psmc6/Med28/Taf10/Med19/Gtf2a2	9	GO_BP	up
GO:0043516	regulation of DNA damage response, signal transduction by p53 class mediator	7/1210	37/28891	0.000758992	0.00944228	0.00692443	Eef1e1/Kmt5a/Pcbp4/Pttg1ip/Sox4/Mif/Zmpste24	7	GO_BP	up
GO:0043618	regulation of transcription from RNA polymerase II promoter in response to stress	7/1210	37/28891	0.000758992	0.00944228	0.00692443	Ces1d/Cebpb/Tmbim6/Cited2/Nfe2l2/Atf4/Nfe2l1	7	GO_BP	up
GO:1902110	positive regulation of mitochondrial membrane permeability involved in apoptotic process	7/1210	37/28891	0.000758992	0.00944228	0.00692443	Vdac2/Ier3/Gsk3a/Gclc/Bax/Slc25a5/Sh3glb1	7	GO_BP	up
GO:1904358	positive regulation of telomere maintenance via telomere lengthening	7/1210	37/28891	0.000758992	0.00944228	0.00692443	Cct7/Mapk3/Cct2/Tcp1/Xrcc5/Cct6a/Cct8	7	GO_BP	up
GO:0001890	placenta development	18/1210	184/28891	0.000760417	0.00944228	0.00692443	Krt19/Hey1/Cebpb/Hes1/Cebpa/Cited2/Ndrg3/St14/Krt8/Tmed2/Ctsl/Dnajb6/Junb/Mapk3/Taf10/Cdkn1b/Hsp90ab1/Grb2	18	GO_BP	up
GO:0009141	nucleoside triphosphate metabolic process	18/1210	184/28891	0.000760417	0.00944228	0.00692443	Atp1b1/Dut/Ndufab1/Nudt2/Sdhb/Ndufa6/Ak2/Ndufc2/Ndufc1/Ndufb9/Ndufs4/Atp5pb/Ndufa12/Ndufs5/Fis1/Ndufa8/Ndufb8/Ndufb6	18	GO_BP	up
GO:0043542	endothelial cell migration	21/1210	231/28891	0.000763543	0.00945316	0.00693241	Stc1/Edn2/Plk2/Dcn/Hspb1/Rgcc/Fgf1/Rab13/Notch1/Gipc1/Cib1/Gadd45a/Rhob/Rac1/Gfus/Csnk2b/Bsg/Glul/Nfe2l2/Col18a1/Jup	21	GO_BP	up
GO:0060419	heart growth	14/1210	125/28891	0.000765592	0.00945316	0.00693241	Rgs4/Sorbs2/Fgf1/Adrb1/Ccnd2/Notch1/Cited2/Gsk3a/Prkar1a/Pim1/Pin1/Hdac2/Vgll4/Ddx39b	14	GO_BP	up
GO:0007009	plasma membrane organization	17/1210	169/28891	0.000769925	0.00945316	0.00693241	Cav2/Dmkn/Clu/Rab3a/Nherf1/Cd9/Gsn/Tpst2/Prkcd/Chmp4c/Chmp1b/Chmp5/S100a10/Mtss2/Flot1/Bin1/Sh3glb1	17	GO_BP	up
GO:0007338	single fertilization	17/1210	169/28891	0.000769925	0.00945316	0.00693241	Plat/Rab3a/Cd9/Plcd4/Cct7/Tpst2/B4galt1/Vdac2/H3f3b/Pithd1/Kdm5b/Hexb/H3f3a/Cct2/Tcp1/Cct6a/Cct8	17	GO_BP	up
GO:0009144	purine nucleoside triphosphate metabolic process	17/1210	169/28891	0.000769925	0.00945316	0.00693241	Atp1b1/Ndufab1/Nudt2/Sdhb/Ndufa6/Ak2/Ndufc2/Ndufc1/Ndufb9/Ndufs4/Atp5pb/Ndufa12/Ndufs5/Fis1/Ndufa8/Ndufb8/Ndufb6	17	GO_BP	up
GO:0051146	striated muscle cell differentiation	28/1210	347/28891	0.000771845	0.00945554	0.00693416	Irx3/Gdf15/Cav2/Rarb/Rgs4/Sorbs2/Cd81/Krt19/Nebl/Cd9/Cxcl10/Adrb1/Six1/Klf5/Ccnd2/Rara/Notch1/Neurl2/Gsk3a/Krt8/Prkar1a/Actg1/Pin1/Flot1/Zmpste24/Hdac2/Ift20/Ddx39b	28	GO_BP	up
GO:0042417	dopamine metabolic process	8/1210	48/28891	0.000784944	0.00957317	0.00702042	Sncb/Sncaip/Nr4a2/Aldh2/Pnkd/Ndufs4/Spr/Comt	8	GO_BP	up
GO:0048873	homeostasis of number of cells within a tissue	8/1210	48/28891	0.000784944	0.00957317	0.00702042	Notch1/Tuba1a/Sox9/Rac1/Il7/Prdx5/Bax/Nfix	8	GO_BP	up
GO:0036293	response to decreased oxygen levels	23/1210	264/28891	0.000792633	0.00964547	0.00707344	Plat/Cd24a/Ece1/Aqp3/Atp1b1/Pgf/Nppc/Rgcc/Nr4a2/Vldlr/Pick1/Tmbim6/Notch1/Egln2/Mmp2/Cited2/Ucp2/Ubqln1/Nfe2l2/Pin1/Stub1/Fundc1/P4hb	23	GO_BP	up
GO:0045050	protein insertion into ER membrane by stop-transfer membrane-anchor sequence	4/1210	11/28891	0.000797481	0.00968294	0.00710092	Emc4/Emc8/Emc6/Emc7	4	GO_BP	up
GO:0055117	regulation of cardiac muscle contraction	10/1210	72/28891	0.000809266	0.0098043	0.00718992	Stc1/Atp1b1/Tmem38a/Adrb1/Atp1a1/Dsc2/Bin1/Calm3/Calm1/Jup	10	GO_BP	up
GO:0001667	ameboidal-type cell migration	35/1210	471/28891	0.000827635	0.00997455	0.00731477	Stc1/Edn2/Rab25/Plk2/Dcn/Nherf1/Hspb1/Rgcc/Fgf1/Cygb/Rab13/Sema3f/Notch1/Gipc1/Akap12/Cib1/Gadd45a/Rhob/Cap1/Sdc4/Sox9/Rac1/Gfus/Pdlim1/Csnk2b/Bsg/Glul/Nfe2l2/Zfand5/Arf6/Adipor1/Col18a1/Jup/Rab11a/Lamtor2	35	GO_BP	up
GO:0048145	regulation of fibroblast proliferation	14/1210	126/28891	0.000828748	0.00997455	0.00731477	Cdkn1a/Grk2/Nupr1/Hras/Med31/Socs1/Lzts2/Trp53inp1/Nras/Gas6/Bax/Mif/Zmpste24/Ndufs4	14	GO_BP	up
GO:0055021	regulation of cardiac muscle tissue growth	11/1210	85/28891	0.000829127	0.00997455	0.00731477	Rgs4/Adrb1/Ccnd2/Notch1/Cited2/Gsk3a/Pim1/Pin1/Hdac2/Vgll4/Ddx39b	11	GO_BP	up
GO:0046902	regulation of mitochondrial membrane permeability	9/1210	60/28891	0.000830606	0.00997455	0.00731477	Dynlt1f/Vdac2/Ier3/Dynlt1c/Gsk3a/Gclc/Bax/Slc25a5/Sh3glb1	9	GO_BP	up
GO:0001666	response to hypoxia	21/1210	233/28891	0.000852969	0.0102207	0.00749528	Plat/Cd24a/Ece1/Aqp3/Atp1b1/Pgf/Rgcc/Nr4a2/Vldlr/Tmbim6/Notch1/Egln2/Mmp2/Cited2/Ucp2/Ubqln1/Nfe2l2/Pin1/Stub1/Fundc1/P4hb	21	GO_BP	up
GO:0016485	protein processing	23/1210	266/28891	0.00087808	0.0104986	0.0076991	Plat/Phex/Ece1/F3/Tmprss2/Serpine2/Pcsk6/Timm17a/Gsn/Pmpcb/Perp/Pitrm1/Casp8/Tbc1d10a/Spcs2/S100a10/Sec11c/Hsp90b1/Plgrkt/Rnpep/Zmpste24/P4hb/Metap2	23	GO_BP	up
GO:0030218	erythrocyte differentiation	16/1210	156/28891	0.000881235	0.0105134	0.00770992	Alas1/Dnase2a/Racgap1/Hmgb2/Zfp36/Cited2/Tcf3/Cebpg/Lyar/Sfxn1/Prmt1/Brd1/Slc25a5/Nfe2l1/Uba5/Smap1	16	GO_BP	up
GO:0042391	regulation of membrane potential	36/1210	491/28891	0.000893536	0.0105225	0.0077166	Kcnj6/Kcnk1/Rgs4/Atp1b1/Celf4/Grk2/Plk2/Rapgef4/Dcn/Nedd4l/Adrb1/Got1/Scn1b/Mllt11/Ucp2/Cdk5/Ppp2r3c/Gclc/Kcnh1/Cx3cl1/Arl6ip5/Atp1a1/Atp1b3/Kif5b/Ndufc2/Dsc2/Bax/Gna11/Bin1/Zmpste24/Calm3/Ndufs4/Gclm/Calm1/Dynll1/Jup	36	GO_BP	up
GO:0048534	hematopoietic or lymphoid organ development	14/1210	127/28891	0.000896242	0.0105225	0.0077166	Polb/Six1/Lmo4/Hes1/Cited2/Adrm1/Ppp2r3c/Ltbr/Tcf3/Nfkb1/Prdx2/Mapk3/Zmpste24/Pax1	14	GO_BP	up
GO:0044743	protein transmembrane import into intracellular organelle	7/1210	38/28891	0.000897113	0.0105225	0.0077166	Timm17a/Tomm40/Pam16/Tomm20/Chchd4/Hspd1/Grpel1	7	GO_BP	up
GO:0051084	'de novo' post-translational protein folding	7/1210	38/28891	0.000897113	0.0105225	0.0077166	H2-DMb1/Dnajb1/Chchd4/Hspa5/Cct2/Sdf2/Sh3glb1	7	GO_BP	up
GO:0032412	regulation of monoatomic ion transmembrane transporter activity	24/1210	283/28891	0.000900294	0.0105225	0.0077166	Atp1b1/Rgs9/Nherf1/Nedd4l/Stac/Adrb1/Dapk1/Pick1/Cox17/Fxyd3/Scn1b/Cdk5/Shisa6/Stk39/S100a1/Stim2/Ubqln1/1810037I17Rik/Atp1b3/Kif5b/Calm3/Snx27/Calm1/Fkbp1a	24	GO_BP	up
GO:0044242	cellular lipid catabolic process	21/1210	234/28891	0.000900971	0.0105225	0.0077166	Bdh2/Ces1d/Pla2g7/Lrp1/Idh1/Auh/Gpcpd1/Pnpla2/Prkcd/Slc25a17/Abhd12/Abhd5/Hadh/Etfa/Hexb/Eci1/Crot/Abhd6/Hadhb/Hadha/Echs1	21	GO_BP	up
GO:0070050	neuron cellular homeostasis	10/1210	73/28891	0.00090309	0.0105225	0.0077166	Marcksl1/Atp6v1e1/Atp6v1g1/Cdk5/Kcnh1/Cx3cl1/Snapin/Hexb/Atp6v1d/Atp6v1f	10	GO_BP	up
GO:0008630	intrinsic apoptotic signaling pathway in response to DNA damage	13/1210	113/28891	0.000906003	0.0105225	0.0077166	Clu/Sfn/Cdkn1a/Nupr1/Aen/Polb/Cdkn2d/Tmem109/Ier3/Bax/Mif/Rps27l/Mcl1	13	GO_BP	up
GO:0016188	synaptic vesicle maturation	6/1210	28/28891	0.000908443	0.0105225	0.0077166	Rab3a/Atp6v1e1/Atp6v1g1/Snapin/Atp6v1d/Atp6v1f	6	GO_BP	up
GO:0051882	mitochondrial depolarization	6/1210	28/28891	0.000908443	0.0105225	0.0077166	Dcn/Got1/Mllt11/Ppp2r3c/Gclc/Gclm	6	GO_BP	up
GO:0071480	cellular response to gamma radiation	6/1210	28/28891	0.000908443	0.0105225	0.0077166	Cdkn1a/Hras/Tmem109/Zmpste24/Xrcc5/Gtf2h5	6	GO_BP	up
GO:2000647	negative regulation of stem cell proliferation	6/1210	28/28891	0.000908443	0.0105225	0.0077166	Rarb/Sfn/Irf6/Cdkn2c/Cebpa/Tsc22d1	6	GO_BP	up
GO:0070200	establishment of protein localization to telomere	5/1210	19/28891	0.000908901	0.0105225	0.0077166	Cct7/Cct2/Tcp1/Cct6a/Cct8	5	GO_BP	up
GO:1902774	late endosome to lysosome transport	5/1210	19/28891	0.000908901	0.0105225	0.0077166	Chmp4c/Chmp1b/Chmp5/Snapin/Arf1	5	GO_BP	up
GO:0007219	Notch signaling pathway	18/1210	187/28891	0.000917964	0.010605	0.00777711	Tcim/Sorbs2/Nrarp/Krt19/Hey1/Jag1/Enho/Got1/Six1/Heyl/Notch1/Hes1/Perp/Cebpa/Akt1s1/Nfkbia/Sox9/Cdkn1b	18	GO_BP	up
GO:0071806	protein transmembrane transport	9/1210	61/28891	0.000938691	0.0108216	0.00793597	Timm17a/Tomm40/Sec61b/Pam16/Tomm20/Chchd4/Hspa5/Hspd1/Grpel1	9	GO_BP	up
GO:0052547	regulation of peptidase activity	34/1210	457/28891	0.00095484	0.0109847	0.00805554	Sfn/F3/Fyn/Grk2/Serpine2/Atp13a2/Dapk1/Gsn/Perp/Cdkn2d/Serpinb5/Casp8/Tbc1d10a/Cycs/Psme2/Ctsd/Ctsl/Arl6ip5/Cstb/Gapdh/Dnajb6/Timp2/Gas6/Bax/Bin1/Rps27l/Hspd1/Akirin2/Bcap31/Pebp1/Fis1/Psma3/Anp32b/Rnf7	34	GO_BP	up
GO:1903522	regulation of blood circulation	23/1210	268/28891	0.000971383	0.0111516	0.00817792	Stc1/Irx3/Gnao1/Rgs4/Atp1b1/Edn2/Grk2/Tmem38a/Adrb1/Mmp2/Scn1b/Gsk3a/S100a1/Cx3cl1/Atp1a1/Dsc2/Glrx3/Bin1/Zmpste24/Calm3/Calm1/Pebp1/Jup	23	GO_BP	up
GO:0000910	cytokinesis	18/1210	188/28891	0.000976326	0.0111849	0.00820234	Racgap1/Gipc1/Dctn3/Rhob/Exoc7/Becn1/Rtkn/Chmp4c/Chmp1b/Chmp5/Rhoc/Pin1/Calm3/Arf1/Sh3glb1/Calm1/Rab11a/Septin7	18	GO_BP	up
GO:0008333	endosome to lysosome transport	10/1210	74/28891	0.00100565	0.0114968	0.00843108	Rhob/Tsg101/Chmp4c/Chmp1b/Plekhf2/Chmp5/Snapin/Stx7/Bin1/Snx27	10	GO_BP	up
GO:0001558	regulation of cell growth	34/1210	459/28891	0.0010285	0.0117335	0.00860466	Crabp2/Rgs4/Sfn/Cdkn1a/Serpine2/Nedd4l/Fam107a/Tnfrsf12a/Adrb1/Sema3f/Cdkn2c/Sgk1/Lrp1/Sertad1/Cib1/Kazald1/Cdkn2d/Gdi1/Cdk5/Zfp639/Tsg101/Gsk3a/Ifrd1/Pin1/Eif2b2/Adipor1/Crlf3/Cdkn1b/Cttn/Vgll4/Sh3glb1/Mtpn/Ddx39b/Lamtor2	34	GO_BP	up
GO:0048640	negative regulation of developmental growth	14/1210	129/28891	0.00104518	0.0118864	0.00871682	Gdf15/Rgs4/Cdkn1a/Stc2/Adrb1/Sema3f/Cited2/Cdk5/Gsk3a/Ifrd1/Hdac2/Cdkn1b/Vgll4/Tcf7l2	14	GO_BP	up
GO:0006066	alcohol metabolic process	28/1210	354/28891	0.00104625	0.0118864	0.00871682	Ces1d/Ces1b/Sptssb/Hsd17b7/Fgf1/Gk5/Got1/Vldlr/Lrp1/Idh1/Cebpa/Ephx1/Fdx1/Nudt3/Sqle/Aco2/Idh2/Sc5d/Nfkb1/Aldh3a2/Impa1/Cyb5r3/Qdpr/Pcbd2/Nfe2l1/Spr/Akr1a1/Adh5	28	GO_BP	up
GO:0006458	'de novo' protein folding	7/1210	39/28891	0.00105429	0.0119037	0.00872953	H2-DMb1/Dnajb1/Chchd4/Hspa5/Cct2/Sdf2/Sh3glb1	7	GO_BP	up
GO:0035909	aorta morphogenesis	7/1210	39/28891	0.00105429	0.0119037	0.00872953	Hey1/Jag1/Six1/Lrp1/Notch1/Hes1/Sox4	7	GO_BP	up
GO:1902686	mitochondrial outer membrane permeabilization involved in programmed cell death	7/1210	39/28891	0.00105429	0.0119037	0.00872953	Vdac2/Ier3/Gsk3a/Gclc/Bax/Slc25a5/Sh3glb1	7	GO_BP	up
GO:0048639	positive regulation of developmental growth	20/1210	221/28891	0.00106471	0.0119966	0.00879766	Crabp2/Foxs1/Pls1/Nedd4l/Atp8a2/Tnfrsf12a/Adrb1/Ccnd2/Lrp1/Notch1/Serp1/Gdi1/Ezr/Ybx3/Il7/Pim1/Pin1/Eif2b2/Sh3glb1/Ddx39b	20	GO_BP	up
GO:0032024	positive regulation of insulin secretion	13/1210	115/28891	0.00106791	0.0120079	0.00880592	Rapgef4/Lrp1/Capn10/Osbp/Serp1/Sox4/Rac1/Prkar1a/Glul/Kif5b/Gna11/Tcf7l2/Dynll1	13	GO_BP	up
GO:0006120	mitochondrial electron transport, NADH to ubiquinone	6/1210	29/28891	0.00110523	0.0123012	0.00902104	Ndufc2/Ndufb9/Iscu/Ndufa8/Ndufb8/Ndufb6	6	GO_BP	up
GO:0006515	protein quality control for misfolded or incompletely synthesized proteins	6/1210	29/28891	0.00110523	0.0123012	0.00902104	Ufd1/Derl1/Rnf5/Rnf126/Stub1/Akirin2	6	GO_BP	up
GO:0010888	negative regulation of lipid storage	6/1210	29/28891	0.00110523	0.0123012	0.00902104	Ces1d/Ces1b/Pnpla2/Nfkbia/Abhd5/Nr1h2	6	GO_BP	up
GO:0043162	ubiquitin-dependent protein catabolic process via the multivesicular body sorting pathway	6/1210	29/28891	0.00110523	0.0123012	0.00902104	Vps36/Tsg101/Chmp4c/Chmp1b/Chmp5/Rnf126	6	GO_BP	up
GO:0070199	establishment of protein localization to chromosome	6/1210	29/28891	0.00110523	0.0123012	0.00902104	Cct7/Wbp2/Cct2/Tcp1/Cct6a/Cct8	6	GO_BP	up
GO:1904377	positive regulation of protein localization to cell periphery	10/1210	75/28891	0.00111755	0.0124132	0.00910315	Dpp10/Pls1/Stac/Lrp1/Cib1/Ezr/Rer1/Arf6/Kif5b/Rab11a	10	GO_BP	up
GO:0034612	response to tumor necrosis factor	19/1210	206/28891	0.00112124	0.012429	0.00911471	Ripk1/Cib1/Cebpa/Zfp36/Irf1/Tuba1a/Krt18/Casp8/Nfkbia/Krt8/Nkiras1/Ybx3/Cx3cl1/Nfkb1/Nfe2l2/Mapk3/Gas6/Rraga/Zfand6	19	GO_BP	up
GO:0043280	positive regulation of cysteine-type endopeptidase activity involved in apoptotic process	14/1210	130/28891	0.00112712	0.0124689	0.00914398	F3/Dapk1/Gsn/Casp8/Cycs/Ctsd/Arl6ip5/Bax/Rps27l/Hspd1/Bcap31/Fis1/Anp32b/Rnf7	14	GO_BP	up
GO:2000058	regulation of ubiquitin-dependent protein catabolic process	17/1210	175/28891	0.00113624	0.0125444	0.00919937	Il33/Clu/Plk2/Trib2/Trib1/Gipc1/Bag5/Gsk3a/Gclc/Pdcl3/Ubqln1/Dda1/Stub1/Rbx1/Csnk1e/Bcap31/Csnk1a1	17	GO_BP	up
GO:0009205	purine ribonucleoside triphosphate metabolic process	16/1210	160/28891	0.00115508	0.0126426	0.00927136	Atp1b1/Ndufab1/Nudt2/Sdhb/Ndufa6/Ndufc2/Ndufc1/Ndufb9/Ndufs4/Atp5pb/Ndufa12/Ndufs5/Fis1/Ndufa8/Ndufb8/Ndufb6	16	GO_BP	up
GO:0010508	positive regulation of autophagy	16/1210	160/28891	0.00115508	0.0126426	0.00927136	Plk2/Dcn/Dapk1/Hspb8/Becn1/Gsk3a/Vdac1/Pip4k2c/Trim8/Scoc/Mapk3/Trp53inp1/Tmem59/Slc25a5/Sh3glb1/Ralb	16	GO_BP	up
GO:0003263	cardioblast proliferation	4/1210	12/28891	0.00115667	0.0126426	0.00927136	Six1/Notch1/Hes1/Pim1	4	GO_BP	up
GO:0003264	regulation of cardioblast proliferation	4/1210	12/28891	0.00115667	0.0126426	0.00927136	Six1/Notch1/Hes1/Pim1	4	GO_BP	up
GO:0061517	macrophage proliferation	4/1210	12/28891	0.00115667	0.0126426	0.00927136	Il33/Clu/Cx3cl1/Mapk3	4	GO_BP	up
GO:0006085	acetyl-CoA biosynthetic process	5/1210	20/28891	0.00117036	0.0126658	0.00928836	Pdk4/Vdac1/Ppcs/Pdhb/Mpc1	5	GO_BP	up
GO:0030150	protein import into mitochondrial matrix	5/1210	20/28891	0.00117036	0.0126658	0.00928836	Timm17a/Tomm40/Pam16/Tomm20/Grpel1	5	GO_BP	up
GO:0031468	nuclear membrane reassembly	5/1210	20/28891	0.00117036	0.0126658	0.00928836	Chmp4c/Chmp1b/Chmp5/Ubxn2a/Nsfl1c	5	GO_BP	up
GO:0035795	negative regulation of mitochondrial membrane permeability	5/1210	20/28891	0.00117036	0.0126658	0.00928836	Dynlt1f/Ier3/Dynlt1c/Gclc/Slc25a5	5	GO_BP	up
GO:2000136	regulation of cell proliferation involved in heart morphogenesis	5/1210	20/28891	0.00117036	0.0126658	0.00928836	Six1/Notch1/Hes1/Sox9/Pim1	5	GO_BP	up
GO:0006520	amino acid metabolic process	23/1210	272/28891	0.00118392	0.0127621	0.00935902	Cdo1/Arg2/Upb1/Got1/Psph/Pycr2/Sephs2/Auh/Ucp2/Txnrd1/Aasdhppt/Gclc/Psat1/Etfa/Glul/Pcmt1/Gfpt1/Qdpr/Atf4/Spr/Comt/Gclm/Hibadh	23	GO_BP	up
GO:0006898	receptor-mediated endocytosis	23/1210	272/28891	0.00118392	0.0127621	0.00935902	Cav2/Clu/Cd81/Grk2/Plk2/Cd9/Cltb/Vldlr/Pick1/Lrp1/Ezr/Cap1/Sh3glb2/Rnasek/Flot1/Ppp3r1/Rala/Arf1/Cttn/Ralb/Grb2/Ap2s1/Smap1	23	GO_BP	up
GO:0030111	regulation of Wnt signaling pathway	26/1210	323/28891	0.00120837	0.0129896	0.00952587	Nrarp/Nherf1/Shisa2/Tbl1xr1/Lrp1/Mdk/Notch1/Map3k1/Shisa6/Gsk3a/Lzts2/Sox4/Sox9/Zbed3/Snx3/Nfkb1/Pin1/Ube2b/Csnk1e/Hdac2/Vgll4/Ift20/Tcf7l2/Ruvbl1/Atp6v0c/Csnk1a1	26	GO_BP	up
GO:0001678	intracellular glucose homeostasis	17/1210	176/28891	0.00120977	0.0129896	0.00952587	Grk2/Pim3/Lrp1/Osbp/Ucp2/Rbm4/Sox4/Rac1/Hmgn3/Ccdc186/Kif5b/Gas6/Ptpmt1/Tcf7l2/Selenot/Dynll1/Eny2	17	GO_BP	up
GO:0033866	nucleoside bisphosphate biosynthetic process	7/1210	40/28891	0.00123231	0.0131542	0.00964656	Pdk4/Vdac1/Ppcs/Coasy/Papss1/Pdhb/Mpc1	7	GO_BP	up
GO:0034030	ribonucleoside bisphosphate biosynthetic process	7/1210	40/28891	0.00123231	0.0131542	0.00964656	Pdk4/Vdac1/Ppcs/Coasy/Papss1/Pdhb/Mpc1	7	GO_BP	up
GO:0034033	purine nucleoside bisphosphate biosynthetic process	7/1210	40/28891	0.00123231	0.0131542	0.00964656	Pdk4/Vdac1/Ppcs/Coasy/Papss1/Pdhb/Mpc1	7	GO_BP	up
GO:0042177	negative regulation of protein catabolic process	13/1210	117/28891	0.00125328	0.0133243	0.00977131	Fyn/Aqp11/Serpine2/Alad/Gipc1/Nqo1/Bag5/Psme3ip1/Gabarapl2/Snx3/Pin1/Timp2/Hsp90ab1	13	GO_BP	up
GO:1902600	proton transmembrane transport	13/1210	117/28891	0.00125328	0.0133243	0.00977131	Atp1b1/Nherf1/Atp6v0e/Atp6v1e1/Cox17/Atp6v1g1/Atp1a1/Atp6v0b/Rnasek/Atp6v1d/Atp5pb/Atp6v0c/Atp6v1f	13	GO_BP	up
GO:0030258	lipid modification	19/1210	208/28891	0.00125654	0.0133243	0.00977131	Bdh2/Plppr1/Pla2g7/Pdk4/Ggta1/Nucb2/Cygb/Auh/Slc25a17/Hadh/Sox9/Etfa/Eci1/Crot/Adipor1/Hadhb/Hadha/Adh5/Echs1	19	GO_BP	up
GO:0032370	positive regulation of lipid transport	12/1210	103/28891	0.00125967	0.0133243	0.00977131	Ces1d/Ces1b/Atp8a2/Nucb2/Lrp1/Prkcd/Nfkbia/Tmf1/Mif/Nr1h2/Pltp/Tmem30a	12	GO_BP	up
GO:0045927	positive regulation of growth	26/1210	324/28891	0.00126284	0.0133243	0.00977131	Crabp2/Sfn/Tfcp2l1/Foxs1/Pls1/Nedd4l/Atp8a2/Tnfrsf12a/Adrb1/Ccnd2/Sgk1/Lrp1/Notch1/Cib1/Serp1/Gdi1/Zfp639/Ezr/Ybx3/Il7/Pim1/Pin1/Eif2b2/Sh3glb1/Mtpn/Ddx39b	26	GO_BP	up
GO:0070482	response to oxygen levels	26/1210	324/28891	0.00126284	0.0133243	0.00977131	Plat/Cd24a/Ece1/Aqp3/Atp1b1/Pgf/Nppc/Rgcc/Nr4a2/Vldlr/Pick1/Tmbim6/Atp6v1g1/Notch1/Egln2/Mmp2/Tmem199/Cited2/Ucp2/Ubqln1/Nfe2l2/Pin1/Stub1/Fundc1/P4hb/Ndufs4	26	GO_BP	up
GO:2001235	positive regulation of apoptotic signaling pathway	17/1210	177/28891	0.0012873	0.0135563	0.00994142	Clu/Nupr1/Nherf1/Tnfrsf12a/Ripk1/Eef1e1/Itm2c/Casp8/Prkcd/Becn1/Ltbr/Ctsl/Bax/Mcl1/Sh3glb1/Bcap31/Fis1	17	GO_BP	up
GO:0018958	phenol-containing compound metabolic process	14/1210	132/28891	0.00130721	0.0137395	0.0100758	Sncb/Kcnj6/Rtl4/Duoxa1/Sncaip/Nr4a2/Aldh2/Gipc1/Ctsl/Pnkd/Ndufs4/Spr/Comt/Ly6e	14	GO_BP	up
GO:0010563	negative regulation of phosphorus metabolic process	32/1210	430/28891	0.00131981	0.0138189	0.010134	Ocln/Cdkn1a/Ppp1r16b/Grk2/Hspb1/Cdkn2c/Ubash3b/Trib1/Gadd45b/Cib1/Gadd45a/Cdkn2d/Irf1/Akt1s1/Ppp5c/Prkcd/Socs1/Tsg101/Dnajc3/Tiprl/Tmed2/Zbed3/Kat2b/Prkar1a/Slc27a1/Bax/Cdkn1b/Pik3ip1/Dynll1/Pebp1/Fis1/Arpp19	32	GO_BP	up
GO:0045936	negative regulation of phosphate metabolic process	32/1210	430/28891	0.00131981	0.0138189	0.010134	Ocln/Cdkn1a/Ppp1r16b/Grk2/Hspb1/Cdkn2c/Ubash3b/Trib1/Gadd45b/Cib1/Gadd45a/Cdkn2d/Irf1/Akt1s1/Ppp5c/Prkcd/Socs1/Tsg101/Dnajc3/Tiprl/Tmed2/Zbed3/Kat2b/Prkar1a/Slc27a1/Bax/Cdkn1b/Pik3ip1/Dynll1/Pebp1/Fis1/Arpp19	32	GO_BP	up
GO:0050866	negative regulation of cell activation	20/1210	225/28891	0.00132452	0.0138418	0.0101508	Dapl1/Cd24a/Arg2/Nrarp/Serpine2/Hspb1/Cd274/Cd9/Cebpb/Cygb/Ubash3b/Mdk/Irf1/Prkcd/Socs1/Gclc/Cx3cl1/Sdc4/Prkar1a/Prdx2	20	GO_BP	up
GO:0090148	membrane fission	6/1210	30/28891	0.00133308	0.013852	0.0101582	Exoc7/Chmp4c/Chmp1b/Chmp5/Slc25a46/Sh3glb1	6	GO_BP	up
GO:1990000	amyloid fibril formation	6/1210	30/28891	0.00133308	0.013852	0.0101582	Camp/Clu/Pfdn4/Ripk1/Gsn/Pfdn2	6	GO_BP	up
GO:0046622	positive regulation of organ growth	9/1210	64/28891	0.00133309	0.013852	0.0101582	Adrb1/Ccnd2/Notch1/Serp1/Ybx3/Il7/Pim1/Pin1/Ddx39b	9	GO_BP	up
GO:1900076	regulation of cellular response to insulin stimulus	11/1210	90/28891	0.00133793	0.0138759	0.0101758	Ptpre/Grk2/Nucb2/Prkcd/Socs1/Gsk3a/Pip4k2c/Ctsd/Uso1/Adipor1/Snx5	11	GO_BP	up
GO:0060562	epithelial tube morphogenesis	30/1210	395/28891	0.00134337	0.013906	0.0101979	Irx3/Pgf/Nrarp/Fgf1/Hey1/Cxcl10/Six1/Ccm2/Fmn1/Mdk/Rara/Notch1/Lmo4/Hes1/Rhob/Cited2/Casp8/Lzts2/Coq7/St14/Vasp/Tmed2/Sdc4/Sox9/Clic4/Kdm5b/Csnk2b/Bsg/Ppp3r1/Rala	30	GO_BP	up
GO:0034605	cellular response to heat	8/1210	52/28891	0.00135074	0.0139532	0.0102325	Tcim/Stac/Fgf1/Dnajb1/Pdcl3/Stub1/Hsp90ab1/Eif2s1	8	GO_BP	up
GO:0001892	embryonic placenta development	13/1210	118/28891	0.00135557	0.0139532	0.0102325	Krt19/Hey1/Cebpb/Hes1/Cebpa/Cited2/St14/Krt8/Tmed2/Dnajb6/Junb/Taf10/Grb2	13	GO_BP	up
GO:0016241	regulation of macroautophagy	13/1210	118/28891	0.00135557	0.0139532	0.0102325	Nupr1/Dcn/Atp13a2/Hspb8/Becn1/Vdac1/Pip4k2c/Ubqln1/Scoc/Mapk3/Slc25a5/Sh3glb1/Ralb	13	GO_BP	up
GO:0006941	striated muscle contraction	17/1210	178/28891	0.001369	0.014065	0.0103144	Stc1/Arg2/Atp1b1/Grk2/Nedd4l/Tmem38a/Stac/Atp8a2/Adrb1/Gsn/Scn1b/Atp1a1/Dsc2/Bin1/Calm3/Calm1/Jup	17	GO_BP	up
GO:0006635	fatty acid beta-oxidation	10/1210	77/28891	0.00137189	0.0140683	0.0103169	Bdh2/Auh/Slc25a17/Hadh/Etfa/Eci1/Crot/Hadhb/Hadha/Echs1	10	GO_BP	up
GO:0046887	positive regulation of hormone secretion	18/1210	194/28891	0.00139723	0.0143014	0.0104878	Edn2/Rapgef4/Nucb2/Ildr1/Lrp1/Capn10/Osbp/Serp1/Sox4/Rac1/Prkar1a/Glul/Tmf1/Kif5b/Gna11/Tcf7l2/Selenot/Dynll1	18	GO_BP	up
GO:0010821	regulation of mitochondrion organization	15/1210	148/28891	0.00141957	0.0145029	0.0106356	Dcn/Atp13a2/Mllt11/Ier3/Gsk3a/Gclc/Vdac1/Ralbp1/Bax/Slc25a5/Rala/Ghitm/Cttn/Sh3glb1/Fis1	15	GO_BP	up
GO:0035794	positive regulation of mitochondrial membrane permeability	7/1210	41/28891	0.001433	0.0146129	0.0107163	Vdac2/Ier3/Gsk3a/Gclc/Bax/Slc25a5/Sh3glb1	7	GO_BP	up
GO:0061178	regulation of insulin secretion involved in cellular response to glucose stimulus	11/1210	91/28891	0.0014654	0.0149155	0.0109382	Pim3/Lrp1/Osbp/Ucp2/Rac1/Hmgn3/Kif5b/Ptpmt1/Tcf7l2/Dynll1/Eny2	11	GO_BP	up
GO:0006816	calcium ion transport	34/1210	469/28891	0.00147631	0.0149611	0.0109716	Stc1/Gnao1/Rgs4/Atp1b1/Rgs9/Fyn/Stc2/Tmem38a/Stac/Bspry/Cxcl10/Adrb1/Ubash3b/Maip1/Tmbim6/Hes1/Trpm3/Cdk5/Vdac1/S100a1/Stim2/Cx3cl1/Ubqln1/1810037I17Rik/Ppp3r1/Gas6/Bax/Bin1/Zmpste24/Calm3/Ghitm/Calm1/Fkbp1a/Selenok	34	GO_BP	up
GO:0051495	positive regulation of cytoskeleton organization	18/1210	195/28891	0.00148052	0.0149611	0.0109716	Gm14137/Cdc42ep2/Rgcc/Fmn1/Gsn/Map3k1/Vasp/Rhoc/S100a10/Cx3cl1/Sdc4/Rac1/Arf6/Pfdn2/Bin1/Cdkn1b/Cttn/Grb2	18	GO_BP	up
GO:0044843	cell cycle G1/S phase transition	22/1210	260/28891	0.00148347	0.0149611	0.0109716	Tcim/Cdkn1a/Plk2/Rhou/Rgcc/Fam107a/Ccnd2/Cdkn2c/Paf1/Cdkn2d/Cdk5/Cdk2ap2/Psme2/Tcf3/Smarcd2/Bach1/Eif4e/Taf10/Rps27l/Crlf3/Cdkn1b/Anp32b	22	GO_BP	up
GO:0061323	cell proliferation involved in heart morphogenesis	5/1210	21/28891	0.00148354	0.0149611	0.0109716	Six1/Notch1/Hes1/Sox9/Pim1	5	GO_BP	up
GO:1901142	insulin metabolic process	5/1210	21/28891	0.00148354	0.0149611	0.0109716	Nucb2/Ctsd/Hsp90b1/P4hb/Tcf7l2	5	GO_BP	up
GO:0070897	transcription preinitiation complex assembly	9/1210	65/28891	0.0014908	0.0150067	0.011005	Med31/Gtf2b/Med30/Med7/Psmc6/Med28/Taf10/Med19/Gtf2a2	9	GO_BP	up
GO:0016570	histone modification	16/1210	164/28891	0.00149762	0.0150476	0.0110351	Prdm6/H1f2/Tbl1xr1/Paf1/Rnf2/Eed/Kat8/Leo1/Kat2b/Ube2b/Taf10/Hdac2/Ube2n/Ruvbl1/Morf4l2/Eny2	16	GO_BP	up
GO:0010631	epithelial cell migration	26/1210	328/28891	0.0015025	0.0150691	0.0110508	Stc1/Edn2/Rab25/Plk2/Dcn/Hspb1/Rgcc/Fgf1/Rab13/Notch1/Gipc1/Cib1/Gadd45a/Rhob/Sox9/Rac1/Gfus/Csnk2b/Bsg/Glul/Nfe2l2/Arf6/Adipor1/Col18a1/Jup/Rab11a	26	GO_BP	up
GO:0060048	cardiac muscle contraction	14/1210	134/28891	0.00151075	0.0151241	0.0110911	Stc1/Atp1b1/Grk2/Nedd4l/Tmem38a/Adrb1/Gsn/Scn1b/Atp1a1/Dsc2/Bin1/Calm3/Calm1/Jup	14	GO_BP	up
GO:0090277	positive regulation of peptide hormone secretion	15/1210	149/28891	0.00151874	0.0151763	0.0111294	Rapgef4/Ildr1/Lrp1/Capn10/Osbp/Serp1/Sox4/Rac1/Prkar1a/Glul/Kif5b/Gna11/Tcf7l2/Selenot/Dynll1	15	GO_BP	up
GO:1903828	negative regulation of protein localization	21/1210	244/28891	0.00152364	0.0151839	0.011135	Kcnj6/Gnao1/Plk2/Pim3/Nedd4l/Ucp2/Gdi1/Cdk5/Lzts2/Tmed2/Hadh/Frmd4a/Idh2/Snx3/Arf6/Nsfl1c/Ptpmt1/Tmem59/Anxa5/Eny2/Gdi2	21	GO_BP	up
GO:1903706	regulation of hemopoiesis	33/1210	452/28891	0.0015326	0.0151839	0.011135	Cd24a/Tcim/Nrarp/Hspb1/Jag1/Cebpb/Ripk1/Hmgb2/Ubash3b/Mdk/Trib1/Rara/Cib1/Cebpa/Zfp36/Paf1/Irf1/Casp8/Socs1/Adrm1/Nfkbia/Ppp2r3c/Pithd1/Tsc22d1/Sox4/Leo1/Il7/Prdx2/Smarcd2/Prmt1/Brd1/Gas6/Smap1	33	GO_BP	up
GO:0003254	regulation of membrane depolarization	8/1210	53/28891	0.00153337	0.0151839	0.011135	Dcn/Nedd4l/Got1/Scn1b/Mllt11/Ppp2r3c/Gclc/Gclm	8	GO_BP	up
GO:0046596	regulation of viral entry into host cell	8/1210	53/28891	0.00153337	0.0151839	0.011135	Tmprss2/Nectin2/Gsn/Trim8/Snx3/Bsg/P4hb/Ly6e	8	GO_BP	up
GO:0071385	cellular response to glucocorticoid stimulus	8/1210	53/28891	0.00153337	0.0151839	0.011135	Trim63/Fbxo32/Fam107a/Sgk1/Zfp36/Gsk3a/Eif4e/Ube2l3	8	GO_BP	up
GO:0032509	endosome transport via multivesicular body sorting pathway	6/1210	31/28891	0.00159511	0.0157137	0.0115235	Vps36/Vta1/Chmp4c/Chmp1b/Chmp5/Leprotl1	6	GO_BP	up
GO:0099022	vesicle tethering	6/1210	31/28891	0.00159511	0.0157137	0.0115235	Trappc6b/Exoc7/Trappc2/Trappc4/Stard3nl/Trappc2l	6	GO_BP	up
GO:0010977	negative regulation of neuron projection development	16/1210	165/28891	0.00159547	0.0157137	0.0115235	Sema3f/Cyth2/Lrp1/Hes1/Itm2c/Cib1/Bag5/Cers2/Gdi1/Cdk5/Gsk3a/Ifrd1/Snapin/Arf6/Mylip/Hdac2	16	GO_BP	up
GO:0060420	regulation of heart growth	11/1210	92/28891	0.00160266	0.0157561	0.0115546	Rgs4/Adrb1/Ccnd2/Notch1/Cited2/Gsk3a/Pim1/Pin1/Hdac2/Vgll4/Ddx39b	11	GO_BP	up
GO:0061458	reproductive system development	27/1210	347/28891	0.0016132	0.0158155	0.0115982	Nppc/Edn2/Grk2/Nupr1/Serpine2/Cebpb/Rab13/Hmgb2/Rara/Notch1/Mmp2/Cited2/Fkbp4/Serpinb5/H3f3b/Adrm1/Eif2s2/Ybx3/Sox9/Rac1/Kdm5b/Tmf1/Eif2b2/Bax/Cdkn1b/Tcf7l2/Ube2q1	27	GO_BP	up
GO:0006086	acetyl-CoA biosynthetic process from pyruvate	4/1210	13/28891	0.00161559	0.0158155	0.0115982	Pdk4/Vdac1/Pdhb/Mpc1	4	GO_BP	up
GO:0072091	regulation of stem cell proliferation	12/1210	106/28891	0.00161736	0.0158155	0.0115982	Cxcl1/Rarb/Sfn/Irf6/Hmgb2/Cdkn2c/Notch1/Cebpa/Tsc22d1/Sox9/Pim1/Epcam	12	GO_BP	up
GO:0090132	epithelium migration	26/1210	330/28891	0.00163635	0.0159727	0.0117134	Stc1/Edn2/Rab25/Plk2/Dcn/Hspb1/Rgcc/Fgf1/Rab13/Notch1/Gipc1/Cib1/Gadd45a/Rhob/Sox9/Rac1/Gfus/Csnk2b/Bsg/Glul/Nfe2l2/Arf6/Adipor1/Col18a1/Jup/Rab11a	26	GO_BP	up
GO:0006417	regulation of translation	31/1210	418/28891	0.00164162	0.0159955	0.0117302	Dapk1/Noct/Rara/Zfp36/Serp1/Polr2g/Btg2/Pelo/Cnot11/Dnajc3/Rbm4/Tmed2/Sox4/Gapdh/Prmt1/Eif4e/Mapk3/Tsfm/Eif5/Pa2g4/Rps27l/Cnot6/Sarnp/Lsm1/Srp9/Eif3k/Mrpl13/Paip2/Ddx39b/Eef2/Eif2s1	31	GO_BP	up
GO:0019827	stem cell population maintenance	19/1210	213/28891	0.00165693	0.0161008	0.0118074	Hes1/Paf1/Pelo/Ing1/Sinhcaf/Trim8/Med30/Med7/Ss18/Sox4/Leo1/Sox9/Suds3/Med28/Eif4e/Hdac2/Tcf7l2/Lsm1/Nfix	19	GO_BP	up
GO:0030866	cortical actin cytoskeleton organization	7/1210	42/28891	0.0016583	0.0161008	0.0118074	Pls1/Rab13/Racgap1/Cdk5/Rtkn/Ezr/Arf6	7	GO_BP	up
GO:0042255	ribosome assembly	9/1210	66/28891	0.00166316	0.0161194	0.011821	Brix1/Mrto4/Rrs1/Mrpl20/Eif5/Rps27l/Xrcc5/Rplp0/Mrps7	9	GO_BP	up
GO:0010822	positive regulation of mitochondrion organization	10/1210	79/28891	0.0016714	0.0161421	0.0118377	Dcn/Mllt11/Gsk3a/Vdac1/Ralbp1/Bax/Slc25a5/Rala/Sh3glb1/Fis1	10	GO_BP	up
GO:0016239	positive regulation of macroautophagy	10/1210	79/28891	0.0016714	0.0161421	0.0118377	Dcn/Hspb8/Becn1/Vdac1/Pip4k2c/Scoc/Mapk3/Slc25a5/Sh3glb1/Ralb	10	GO_BP	up
GO:0031334	positive regulation of protein-containing complex assembly	19/1210	214/28891	0.00174878	0.0168441	0.0123525	Gm14137/Cd24a/Clu/Cdc42ep2/Fmn1/Map3k1/Vasp/Rhoc/Rac1/Psmc6/Arf6/Stub1/Bax/Bin1/Nr1h2/Cdkn1b/Cttn/Sh3glb1/Grb2	19	GO_BP	up
GO:0032273	positive regulation of protein polymerization	11/1210	93/28891	0.00175024	0.0168441	0.0123525	Gm14137/Cdc42ep2/Fmn1/Map3k1/Vasp/Rac1/Arf6/Bin1/Cdkn1b/Cttn/Grb2	11	GO_BP	up
GO:0001657	ureteric bud development	12/1210	107/28891	0.00175369	0.0168478	0.0123552	Rarb/Arg2/Pgf/Fgf1/Hey1/Six1/Fmn1/Rara/Hes1/Lzts2/Sox9/Epcam	12	GO_BP	up
GO:0090130	tissue migration	26/1210	332/28891	0.00178032	0.0170736	0.0125208	Stc1/Edn2/Rab25/Plk2/Dcn/Hspb1/Rgcc/Fgf1/Rab13/Notch1/Gipc1/Cib1/Gadd45a/Rhob/Sox9/Rac1/Gfus/Csnk2b/Bsg/Glul/Nfe2l2/Arf6/Adipor1/Col18a1/Jup/Rab11a	26	GO_BP	up
GO:0009199	ribonucleoside triphosphate metabolic process	16/1210	167/28891	0.00180733	0.0173023	0.0126886	Atp1b1/Ndufab1/Nudt2/Sdhb/Ndufa6/Ndufc2/Ndufc1/Ndufb9/Ndufs4/Atp5pb/Ndufa12/Ndufs5/Fis1/Ndufa8/Ndufb8/Ndufb6	16	GO_BP	up
GO:0002262	myeloid cell homeostasis	19/1210	215/28891	0.0018449	0.0175674	0.0128829	Cd24a/Alas1/Dnase2a/Racgap1/Hmgb2/Zfp36/Cited2/Tcf3/Cebpg/Lyar/Sfxn1/Prmt1/Brd1/Bax/Slc25a5/Nfe2l1/Uba5/Prdx1/Smap1	19	GO_BP	up
GO:1902905	positive regulation of supramolecular fiber organization	17/1210	183/28891	0.00184623	0.0175674	0.0128829	Gm14137/Cdc42ep2/Rgcc/Fmn1/Gsn/Map3k1/Vasp/Rhoc/S100a10/Cx3cl1/Sdc4/Rac1/Arf6/Bin1/Cdkn1b/Cttn/Grb2	17	GO_BP	up
GO:0007039	protein catabolic process in the vacuole	5/1210	22/28891	0.00185426	0.0175674	0.0128829	Cd81/Atp13a2/Lrp1/Tmem199/Lamp2	5	GO_BP	up
GO:0034312	diol biosynthetic process	5/1210	22/28891	0.00185426	0.0175674	0.0128829	Sptssb/Ephx1/Qdpr/Pcbd2/Spr	5	GO_BP	up
GO:1903909	regulation of receptor clustering	5/1210	22/28891	0.00185426	0.0175674	0.0128829	Sorbs2/Cd81/Gsn/Shisa6/Snx27	5	GO_BP	up
GO:1905709	negative regulation of membrane permeability	5/1210	22/28891	0.00185426	0.0175674	0.0128829	Dynlt1f/Ier3/Dynlt1c/Gclc/Slc25a5	5	GO_BP	up
GO:0003158	endothelium development	14/1210	137/28891	0.0018651	0.0176395	0.0129358	Stc1/Ppp1r16b/Fgf1/Hey1/Jag1/Cxcl10/Ccm2/Notch1/Rhob/Ezr/Clic4/Csnk2b/Bsg/Col18a1	14	GO_BP	up
GO:1901099	negative regulation of signal transduction in absence of ligand	6/1210	32/28891	0.00189449	0.0178558	0.0130944	Fyn/Ripk1/Cx3cl1/Il7/Prdx2/Mcl1	6	GO_BP	up
GO:2001240	negative regulation of extrinsic apoptotic signaling pathway in absence of ligand	6/1210	32/28891	0.00189449	0.0178558	0.0130944	Fyn/Ripk1/Cx3cl1/Il7/Prdx2/Mcl1	6	GO_BP	up
GO:0006094	gluconeogenesis	11/1210	94/28891	0.00190871	0.0179112	0.0131351	Fbp2/Got1/Mdh2/Zfp692/Slc25a11/Gpd2/Kat2b/Gapdh/Atf4/Tcf7l2/Arpp19	11	GO_BP	up
GO:1902108	regulation of mitochondrial membrane permeability involved in apoptotic process	7/1210	43/28891	0.00191018	0.0179112	0.0131351	Vdac2/Ier3/Gsk3a/Gclc/Bax/Slc25a5/Sh3glb1	7	GO_BP	up
GO:1905710	positive regulation of membrane permeability	7/1210	43/28891	0.00191018	0.0179112	0.0131351	Vdac2/Ier3/Gsk3a/Gclc/Bax/Slc25a5/Sh3glb1	7	GO_BP	up
GO:0002793	positive regulation of peptide secretion	15/1210	153/28891	0.00197534	0.0184906	0.0135599	Rapgef4/Ildr1/Lrp1/Capn10/Osbp/Serp1/Sox4/Rac1/Prkar1a/Glul/Kif5b/Gna11/Tcf7l2/Selenot/Dynll1	15	GO_BP	up
GO:0000082	G1/S transition of mitotic cell cycle	20/1210	233/28891	0.00200897	0.0187732	0.0137672	Cdkn1a/Plk2/Rhou/Rgcc/Fam107a/Ccnd2/Cdkn2c/Cdkn2d/Cdk5/Cdk2ap2/Psme2/Tcf3/Smarcd2/Bach1/Eif4e/Taf10/Rps27l/Crlf3/Cdkn1b/Anp32b	20	GO_BP	up
GO:0000281	mitotic cytokinesis	10/1210	81/28891	0.00202175	0.0188605	0.0138312	Racgap1/Rhob/Exoc7/Rtkn/Chmp4c/Chmp1b/Chmp5/Rhoc/Arf1/Septin7	10	GO_BP	up
GO:0046364	monosaccharide biosynthetic process	12/1210	109/28891	0.00205471	0.0190793	0.0139917	Fbp2/Got1/Mdh2/Zfp692/Slc25a11/Gpd2/Kat2b/Gapdh/Atf4/Tcf7l2/Akr1a1/Arpp19	12	GO_BP	up
GO:1904427	positive regulation of calcium ion transmembrane transport	12/1210	109/28891	0.00205471	0.0190793	0.0139917	Atp1b1/Stac/Cxcl10/Adrb1/Cdk5/S100a1/Stim2/Cx3cl1/Ppp3r1/Bax/Calm3/Calm1	12	GO_BP	up
GO:0030330	DNA damage response, signal transduction by p53 class mediator	9/1210	68/28891	0.00205566	0.0190793	0.0139917	Cdkn1a/Eef1e1/Kmt5a/Pcbp4/Pttg1ip/Sox4/Mif/Zmpste24/Rps27l	9	GO_BP	up
GO:0060828	regulation of canonical Wnt signaling pathway	21/1210	251/28891	0.00215157	0.0199357	0.0146197	Nrarp/Nherf1/Tbl1xr1/Mdk/Notch1/Map3k1/Shisa6/Gsk3a/Lzts2/Sox4/Sox9/Zbed3/Nfkb1/Pin1/Ube2b/Csnk1e/Hdac2/Ift20/Tcf7l2/Ruvbl1/Csnk1a1	21	GO_BP	up
GO:0098727	maintenance of cell number	19/1210	218/28891	0.00216047	0.0199606	0.014638	Hes1/Paf1/Pelo/Ing1/Sinhcaf/Trim8/Med30/Med7/Ss18/Sox4/Leo1/Sox9/Suds3/Med28/Eif4e/Hdac2/Tcf7l2/Lsm1/Nfix	19	GO_BP	up
GO:0016482	cytosolic transport	16/1210	170/28891	0.00216894	0.0199606	0.014638	Plekhj1/Tbc1d10a/Becn1/Rab6a/Ezr/Rnf126/Snx3/Tmem87a/Mapk3/Kif5b/Srsf10/Snx5/Stx6/Sh3glb1/Rab11a/Vps29	16	GO_BP	up
GO:0006002	fructose 6-phosphate metabolic process	4/1210	14/28891	0.00218728	0.0199606	0.014638	Fbp2/Taldo1/Gfpt1/Nfe2l1	4	GO_BP	up
GO:0006750	glutathione biosynthetic process	4/1210	14/28891	0.00218728	0.0199606	0.014638	Hagh/Gclc/Nfe2l2/Gclm	4	GO_BP	up
GO:0036258	multivesicular body assembly	4/1210	14/28891	0.00218728	0.0199606	0.014638	Chmp4c/Chmp1b/Chmp5/Rab11a	4	GO_BP	up
GO:0039702	viral budding via host ESCRT complex	4/1210	14/28891	0.00218728	0.0199606	0.014638	Tsg101/Chmp4c/Chmp1b/Chmp5	4	GO_BP	up
GO:0048505	regulation of timing of cell differentiation	4/1210	14/28891	0.00218728	0.0199606	0.014638	Serpine2/Jag1/Notch1/Hes1	4	GO_BP	up
GO:1901533	negative regulation of hematopoietic progenitor cell differentiation	4/1210	14/28891	0.00218728	0.0199606	0.014638	Notch1/Hes1/Zfp36/Nfe2l2	4	GO_BP	up
GO:0072595	maintenance of protein localization in organelle	7/1210	44/28891	0.00219071	0.0199606	0.014638	Grk2/Kdelr2/Cdk5/Rer1/Tmed2/Skp1/Hspa5	7	GO_BP	up
GO:1901021	positive regulation of calcium ion transmembrane transporter activity	7/1210	44/28891	0.00219071	0.0199606	0.014638	Atp1b1/Stac/Cdk5/S100a1/Stim2/Calm3/Calm1	7	GO_BP	up
GO:0071356	cellular response to tumor necrosis factor	17/1210	186/28891	0.00219452	0.0199621	0.0146391	Ripk1/Cib1/Cebpa/Zfp36/Irf1/Krt18/Nfkbia/Krt8/Nkiras1/Ybx3/Cx3cl1/Nfkb1/Nfe2l2/Mapk3/Gas6/Rraga/Zfand6	17	GO_BP	up
GO:0046626	regulation of insulin receptor signaling pathway	10/1210	82/28891	0.00221786	0.0200969	0.014738	Ptpre/Nucb2/Prkcd/Socs1/Gsk3a/Rbm4/Pip4k2c/Ctsd/Adipor1/Snx5	10	GO_BP	up
GO:0072163	mesonephric epithelium development	12/1210	110/28891	0.00222035	0.0200969	0.014738	Rarb/Arg2/Pgf/Fgf1/Hey1/Six1/Fmn1/Rara/Hes1/Lzts2/Sox9/Epcam	12	GO_BP	up
GO:0072164	mesonephric tubule development	12/1210	110/28891	0.00222035	0.0200969	0.014738	Rarb/Arg2/Pgf/Fgf1/Hey1/Six1/Fmn1/Rara/Hes1/Lzts2/Sox9/Epcam	12	GO_BP	up
GO:0010875	positive regulation of cholesterol efflux	6/1210	33/28891	0.00223451	0.0201584	0.0147831	Ces1d/Ces1b/Lrp1/Nfkbia/Nr1h2/Pltp	6	GO_BP	up
GO:0048668	collateral sprouting	6/1210	33/28891	0.00223451	0.0201584	0.0147831	Crabp2/Lrp1/Nin/Ifrd1/Nfix/Septin7	6	GO_BP	up
GO:1903555	regulation of tumor necrosis factor superfamily cytokine production	19/1210	219/28891	0.00227527	0.0204817	0.0150201	Il33/Cd24a/Arg2/Clu/Spon2/Hspb1/Arid5a/Selenos/Cd274/Ripk1/Rara/Akap12/Zfp36/Cx3cl1/Gas6/Mif/Hdac2/Hspd1/Selenok	19	GO_BP	up
GO:0150116	regulation of cell-substrate junction organization	9/1210	69/28891	0.00227783	0.0204817	0.0150201	Fam107a/Fmn1/Lrp1/S100a10/Sdc4/Rac1/Actg1/Arf6/Lamtor2	9	GO_BP	up
GO:0000303	response to superoxide	5/1210	23/28891	0.00228846	0.02051	0.0150408	Nqo1/Ucp2/Prdx2/Nfe2l2/Prdx1	5	GO_BP	up
GO:0070861	regulation of protein exit from endoplasmic reticulum	5/1210	23/28891	0.00228846	0.02051	0.0150408	Cd81/Tmem30b/Sar1b/Bcap31/Tmem30a	5	GO_BP	up
GO:0042770	signal transduction in response to DNA damage	17/1210	187/28891	0.00232217	0.0207782	0.0152375	Cdkn1a/Prpf19/Eef1e1/Gadd45a/Ier3/Kmt5a/Pcbp4/Pttg1ip/Tiprl/Sox4/Mapk3/Mif/Zmpste24/Rps27l/Syf2/Grb2/Ddx39b	17	GO_BP	up
GO:1903311	regulation of mRNA metabolic process	24/1210	304/28891	0.0023544	0.0210321	0.0154238	Celf4/Prpf19/Carhsp1/Noct/Rbm20/Zfp36/Paf1/Polr2g/Btg2/Malat1/Pcbp4/Rbm4/Ttc5/Leo1/Srsf10/Hnrnpl/Clns1a/Cnot6/Rbm7/Mbnl2/Srsf9/Lsm1/Puf60/Rbm47	24	GO_BP	up
GO:0048545	response to steroid hormone	21/1210	253/28891	0.00236683	0.0211087	0.0154799	Trim63/Cdo1/Fibin/Fbxo32/Fam107a/Heyl/Hmgb2/Sgk1/Idh1/Zfp36/Fkbp4/Ppp5c/Gsk3a/Stk39/Wbp2/Atp1a1/Calcoco1/Tmf1/Eif4e/Ube2l3/Uba5	21	GO_BP	up
GO:0007422	peripheral nervous system development	10/1210	83/28891	0.00242898	0.0215926	0.0158348	Hras/Nab2/Heyl/Cited2/Cdk5/Slc25a46/Aldh3a2/Mapk3/Ppp3r1/Grb2	10	GO_BP	up
GO:0048844	artery morphogenesis	10/1210	83/28891	0.00242898	0.0215926	0.0158348	Hpgd/Hey1/Jag1/Six1/Lrp1/Mdk/Notch1/Hes1/Cited2/Sox4	10	GO_BP	up
GO:2000785	regulation of autophagosome assembly	7/1210	45/28891	0.00250198	0.0222056	0.0162843	Nupr1/Becn1/Rnf5/Pip4k2c/Ift20/Sh3glb1/Ralb	7	GO_BP	up
GO:0009612	response to mechanical stimulus	17/1210	189/28891	0.00259614	0.023004	0.0168698	Fyn/Krt5/Serpine2/Atp8a2/Got1/Mdk/Gsn/Mmp2/Tuba1a/Nfkbia/Abhd12/Sox9/Rac1/Atp1a1/Nfkb1/Tmem87a/Jup	17	GO_BP	up
GO:0003416	endochondral bone growth	6/1210	34/28891	0.00261852	0.0231648	0.0169878	Stc1/Rarb/Nppc/Rara/Sox9/Zmpste24	6	GO_BP	up
GO:0019319	hexose biosynthetic process	11/1210	98/28891	0.00266355	0.0235252	0.017252	Fbp2/Got1/Mdh2/Zfp692/Slc25a11/Gpd2/Kat2b/Gapdh/Atf4/Tcf7l2/Arpp19	11	GO_BP	up
GO:0010976	positive regulation of neuron projection development	20/1210	239/28891	0.0027004	0.0238122	0.0174625	Cd24a/Fyn/Serpine2/Hspb1/Atp8a2/Dynlt1f/Vldlr/Lrp1/Mdk/Scn1b/Tubb2b/Dynlt1c/Cx3cl1/Kat2b/Snx3/Nfe2l2/Hspa5/Ranbp1/Twf1/Tmem30a	20	GO_BP	up
GO:1903034	regulation of response to wounding	16/1210	174/28891	0.00274311	0.02415	0.0177102	Plat/Il33/Cd24a/Serpine2/Hras/Tnfrsf12a/Cd9/Lrp1/Ubash3b/Mdk/Cers2/Prkcd/Actg1/Prdx2/Nfe2l2/Anxa5	16	GO_BP	up
GO:1903170	negative regulation of calcium ion transmembrane transport	8/1210	58/28891	0.00275956	0.0242308	0.0177695	Tmbim6/Vdac1/Ubqln1/1810037I17Rik/Ppp3r1/Bin1/Calm3/Calm1	8	GO_BP	up
GO:0048608	reproductive structure development	26/1210	343/28891	0.00278163	0.0242308	0.0177695	Nppc/Edn2/Grk2/Nupr1/Serpine2/Cebpb/Rab13/Hmgb2/Rara/Notch1/Mmp2/Cited2/Fkbp4/Serpinb5/H3f3b/Adrm1/Eif2s2/Ybx3/Sox9/Rac1/Kdm5b/Tmf1/Eif2b2/Bax/Cdkn1b/Tcf7l2	26	GO_BP	up
GO:0001823	mesonephros development	12/1210	113/28891	0.00278378	0.0242308	0.0177695	Rarb/Arg2/Pgf/Fgf1/Hey1/Six1/Fmn1/Rara/Hes1/Lzts2/Sox9/Epcam	12	GO_BP	up
GO:0008654	phospholipid biosynthetic process	19/1210	223/28891	0.00278706	0.0242308	0.0177695	Sgms2/Pigf/Agpat3/Idh1/Serinc5/Chpt1/Osbp/Socs1/Becn1/Pip4k2c/Abhd5/Bpnt1/Cds1/Hexb/Impa1/Slc27a1/Ptpmt1/Vapa/Sh3glb1	19	GO_BP	up
GO:0000305	response to oxygen radical	5/1210	24/28891	0.00279212	0.0242308	0.0177695	Nqo1/Ucp2/Prdx2/Nfe2l2/Prdx1	5	GO_BP	up
GO:0042026	protein refolding	5/1210	24/28891	0.00279212	0.0242308	0.0177695	Hspb1/Bag5/Dnaja2/Hspa5/Hspd1	5	GO_BP	up
GO:0048025	negative regulation of mRNA splicing, via spliceosome	5/1210	24/28891	0.00279212	0.0242308	0.0177695	Celf4/Rbm20/Pcbp4/Srsf10/Srsf9	5	GO_BP	up
GO:0097284	hepatocyte apoptotic process	5/1210	24/28891	0.00279212	0.0242308	0.0177695	Gsn/Krt18/Casp8/Krt8/Arf6	5	GO_BP	up
GO:1901028	regulation of mitochondrial outer membrane permeabilization involved in apoptotic signaling pathway	5/1210	24/28891	0.00279212	0.0242308	0.0177695	Ier3/Gsk3a/Gclc/Slc25a5/Sh3glb1	5	GO_BP	up
GO:0048588	developmental cell growth	23/1210	291/28891	0.00282576	0.0244839	0.0179551	Crabp2/Rgs4/Sorbs2/Edn2/Nedd4l/Tnfrsf12a/Adrb1/Sema3f/Lrp1/Gdi1/Cdk5/Nin/Gsk3a/Ifrd1/Sox9/Pin1/Eif2b2/Cttn/Sh3glb1/Nfix/Hsp90ab1/Ddx39b/Septin7	23	GO_BP	up
GO:0008544	epidermis development	29/1210	397/28891	0.00283306	0.0245056	0.017971	Zfp750/Sfn/Cdkn1a/Irf6/Pls1/Krt5/Prss8/Nherf1/Grhl1/Foxq1/Cst6/Hey1/Jag1/Nab2/Notch1/Hes1/Zfp36/Lsr/Tsg101/St14/Sox9/Rac1/Ctsl/Clic4/Aldh3a2/Slc39a7/Mafg/Zmpste24/Hdac2	29	GO_BP	up
GO:0002347	response to tumor cell	7/1210	46/28891	0.00284616	0.0245056	0.017971	Cd24a/Nectin2/Cd274/Dapk1/Notch1/Prdx2/Hspd1	7	GO_BP	up
GO:0048489	synaptic vesicle transport	7/1210	46/28891	0.00284616	0.0245056	0.017971	Rab3a/Bloc1s4/Cdk5/Snapin/Kif5b/Arf1/Tmem230	7	GO_BP	up
GO:0051452	intracellular pH reduction	7/1210	46/28891	0.00284616	0.0245056	0.017971	Aqp11/Tmem199/Rab20/Snapin/Clic4/Rnasek/Atp6v0c	7	GO_BP	up
GO:0010544	negative regulation of platelet activation	4/1210	15/28891	0.00288449	0.0245653	0.0180148	Serpine2/Cd9/Ubash3b/Prkcd	4	GO_BP	up
GO:0034350	regulation of glial cell apoptotic process	4/1210	15/28891	0.00288449	0.0245653	0.0180148	Akap12/Cdk5/Prkcd/Gas6	4	GO_BP	up
GO:0035627	ceramide transport	4/1210	15/28891	0.00288449	0.0245653	0.0180148	Osbp/Gltp/Pltp/Vapa	4	GO_BP	up
GO:0036257	multivesicular body organization	4/1210	15/28891	0.00288449	0.0245653	0.0180148	Chmp4c/Chmp1b/Chmp5/Rab11a	4	GO_BP	up
GO:0036499	PERK-mediated unfolded protein response	4/1210	15/28891	0.00288449	0.0245653	0.0180148	Tmed2/Nfe2l2/Atf4/Eif2s1	4	GO_BP	up
GO:0097212	lysosomal membrane organization	4/1210	15/28891	0.00288449	0.0245653	0.0180148	Chmp4c/Chmp1b/Chmp5/Arf1	4	GO_BP	up
GO:2000811	negative regulation of anoikis	4/1210	15/28891	0.00288449	0.0245653	0.0180148	Pdk4/Notch1/Ptrh2/Mcl1	4	GO_BP	up
GO:0042552	myelination	17/1210	191/28891	0.0028965	0.0246163	0.0180522	Rarb/Clu/Fyn/Cmtm8/Nkx6-2/Hras/Cd9/Nab2/Rara/Serinc5/Slc25a46/Hexb/Mapk3/Eif2b2/Ppp3r1/Tcf7l2/Grb2	17	GO_BP	up
GO:1901796	regulation of signal transduction by p53 class mediator	10/1210	85/28891	0.00289947	0.0246163	0.0180522	Eef1e1/Kmt5a/Pcbp4/Pttg1ip/Sox4/Rrs1/Mif/Zmpste24/Pak1ip1/Sh3glb1	10	GO_BP	up
GO:0019216	regulation of lipid metabolic process	29/1210	398/28891	0.00293708	0.024897	0.018258	Ces1d/Ces1b/Pdk4/Hpgd/Fgf1/Nucb2/Tbl1xr1/Idh1/Pnpla2/Cers2/Lsr/Prkcd/Abhd5/Sox9/Kat2b/Atp1a1/Nfkb1/Mlx/Abhd6/Stub1/Adipor1/Slc27a1/Zmpste24/Nr1h2/Arf1/Nfe2l1/Pik3ip1/Tcf7l2/Sh3glb1	29	GO_BP	up
GO:0060560	developmental growth involved in morphogenesis	23/1210	292/28891	0.00294926	0.0249616	0.0183054	Crabp2/Edn2/Nedd4l/Fgf1/Tnfrsf12a/Sema3f/Six1/Fmn1/Lrp1/Notch1/Gdi1/Cdk5/Nin/Lzts2/Ifrd1/Sox9/Kdm5b/Eif2b2/Cttn/Sh3glb1/Nfix/Hsp90ab1/Septin7	23	GO_BP	up
GO:0071985	multivesicular body sorting pathway	6/1210	35/28891	0.00304997	0.0257452	0.0188801	Vps36/Vta1/Chmp4c/Chmp1b/Chmp5/Leprotl1	6	GO_BP	up
GO:0032507	maintenance of protein location in cell	9/1210	72/28891	0.00306065	0.0257452	0.0188801	Grk2/Gsn/Kdelr2/Cdk5/Rer1/Tmed2/Skp1/Hspa5/Twf1	9	GO_BP	up
GO:0086003	cardiac muscle cell contraction	9/1210	72/28891	0.00306065	0.0257452	0.0188801	Stc1/Nedd4l/Adrb1/Gsn/Scn1b/Atp1a1/Dsc2/Bin1/Jup	9	GO_BP	up
GO:0090278	negative regulation of peptide hormone secretion	9/1210	72/28891	0.00306065	0.0257452	0.0188801	Kcnj6/Gnao1/Pim3/Nucb2/Ucp2/Hadh/Ptpmt1/Anxa5/Eny2	9	GO_BP	up
GO:0006513	protein monoubiquitination	8/1210	59/28891	0.00307747	0.0258005	0.0189206	Trim63/Nedd4l/Rnf2/Tsg101/Rnf126/Skp1/Rbx1/Ube2d3	8	GO_BP	up
GO:2000649	regulation of sodium ion transmembrane transporter activity	8/1210	59/28891	0.00307747	0.0258005	0.0189206	Atp1b1/Nherf1/Nedd4l/Pick1/Fxyd3/Scn1b/Stk39/Kif5b	8	GO_BP	up
GO:0044772	mitotic cell cycle phase transition	32/1210	454/28891	0.00308136	0.0258005	0.0189206	Rad51b/Cdkn1a/Plk2/Rhou/Rgcc/Fam107a/Ccnd2/Cdkn2c/Cks1b/Cdkn2d/Cdk5/Ier3/Cdk2ap2/Chmp4c/Psme2/Zwint/Dync1li1/Tcf3/Smarcd2/Bach1/Eif4e/Taf10/Calm3/Rps27l/Crlf3/Cdkn1b/Syf2/Calm1/Nfix/Rab11a/Arpp19/Anp32b	32	GO_BP	up
GO:0034614	cellular response to reactive oxygen species	14/1210	145/28891	0.0031592	0.0263426	0.0193182	Fyn/Ripk1/Mmp2/Nqo1/Rhob/Prkcd/Net1/Prdx2/Nfe2l2/Stk25/Mapk3/Prdx5/Hdac2/Prdx1	14	GO_BP	up
GO:2001257	regulation of cation channel activity	14/1210	145/28891	0.0031592	0.0263426	0.0193182	Nedd4l/Stac/Adrb1/Pick1/Scn1b/Cdk5/S100a1/Stim2/Ubqln1/Kif5b/Calm3/Snx27/Calm1/Fkbp1a	14	GO_BP	up
GO:0072332	intrinsic apoptotic signaling pathway by p53 class mediator	10/1210	86/28891	0.00316054	0.0263426	0.0193182	Cdkn1a/Nupr1/Aen/Perp/Tmem109/Pttg1ip/Bax/Mif/Rps27l/Sh3glb1	10	GO_BP	up
GO:0009262	deoxyribonucleotide metabolic process	7/1210	47/28891	0.00322546	0.0267616	0.0196254	Dera/Urah/Upb1/Dut/Nudt18/Ak2/Cmpk1	7	GO_BP	up
GO:0048246	macrophage chemotaxis	7/1210	47/28891	0.00322546	0.0267616	0.0196254	Edn2/Mdk/Mmp2/Cx3cl1/Akirin1/Mapk3/Mif	7	GO_BP	up
GO:0060563	neuroepithelial cell differentiation	7/1210	47/28891	0.00322546	0.0267616	0.0196254	Jag1/Cebpb/Notch1/Hes1/Tubb5/Sox4/Nfe2l1	7	GO_BP	up
GO:0071706	tumor necrosis factor superfamily cytokine production	19/1210	226/28891	0.00323122	0.0267688	0.0196307	Il33/Cd24a/Arg2/Clu/Spon2/Hspb1/Arid5a/Selenos/Cd274/Ripk1/Rara/Akap12/Zfp36/Cx3cl1/Gas6/Mif/Hdac2/Hspd1/Selenok	19	GO_BP	up
GO:0061572	actin filament bundle organization	16/1210	177/28891	0.0032519	0.0268994	0.0197265	Kctd13/Pls1/Rgcc/Fam107a/Phactr1/Rflnb/Map3k1/Ezr/Rhoc/S100a10/Cx3cl1/Sdc4/Rac1/Actg1/Pdlim1/Hsp90b1	16	GO_BP	up
GO:0045787	positive regulation of cell cycle	27/1210	365/28891	0.00326957	0.0270047	0.0198038	Rad51b/Nupr1/Rgcc/Racgap1/Ccnd2/Rara/Gipc1/Hes1/Paf1/Cited2/Dynlt3/Becn1/Dync1li1/Tcf3/Kat2b/Smc4/Pim1/Eif4e/Ranbp1/Nsfl1c/Ube2b/Cdkn1b/Pebp1/Fnta/Rab11a/Ddx39b/Anp32b	27	GO_BP	up
GO:0090559	regulation of membrane permeability	9/1210	73/28891	0.00336405	0.0276365	0.020267	Dynlt1f/Vdac2/Ier3/Dynlt1c/Gsk3a/Gclc/Bax/Slc25a5/Sh3glb1	9	GO_BP	up
GO:2001244	positive regulation of intrinsic apoptotic signaling pathway	9/1210	73/28891	0.00336405	0.0276365	0.020267	Clu/Nupr1/Nherf1/Becn1/Bax/Mcl1/Sh3glb1/Bcap31/Fis1	9	GO_BP	up
GO:0046697	decidualization	5/1210	25/28891	0.00337129	0.0276365	0.020267	Cited2/Ndrg3/Ctsl/Junb/Mapk3	5	GO_BP	up
GO:0050686	negative regulation of mRNA processing	5/1210	25/28891	0.00337129	0.0276365	0.020267	Celf4/Rbm20/Pcbp4/Srsf10/Srsf9	5	GO_BP	up
GO:1904031	positive regulation of cyclin-dependent protein kinase activity	5/1210	25/28891	0.00337129	0.0276365	0.020267	Rgcc/Ccnd2/Pim1/Cdkn1b/Hsp90ab1	5	GO_BP	up
GO:0007272	ensheathment of neurons	17/1210	194/28891	0.00340073	0.0277946	0.020383	Rarb/Clu/Fyn/Cmtm8/Nkx6-2/Hras/Cd9/Nab2/Rara/Serinc5/Slc25a46/Hexb/Mapk3/Eif2b2/Ppp3r1/Tcf7l2/Grb2	17	GO_BP	up
GO:0008366	axon ensheathment	17/1210	194/28891	0.00340073	0.0277946	0.020383	Rarb/Clu/Fyn/Cmtm8/Nkx6-2/Hras/Cd9/Nab2/Rara/Serinc5/Slc25a46/Hexb/Mapk3/Eif2b2/Ppp3r1/Tcf7l2/Grb2	17	GO_BP	up
GO:0030225	macrophage differentiation	8/1210	60/28891	0.00342314	0.0278639	0.0204338	Il33/Ripk1/Trib1/Cebpa/Ucp2/Casp8/Socs1/Nfix	8	GO_BP	up
GO:0035036	sperm-egg recognition	8/1210	60/28891	0.00342314	0.0278639	0.0204338	Cd9/Cct7/B4galt1/Vdac2/Cct2/Tcp1/Cct6a/Cct8	8	GO_BP	up
GO:0071453	cellular response to oxygen levels	15/1210	162/28891	0.00342956	0.0278639	0.0204338	Aqp3/Rgcc/Vldlr/Pick1/Tmbim6/Atp6v1g1/Notch1/Egln2/Tmem199/Cited2/Ubqln1/Nfe2l2/Stub1/P4hb/Ndufs4	15	GO_BP	up
GO:1902652	secondary alcohol metabolic process	15/1210	162/28891	0.00342956	0.0278639	0.0204338	Ces1d/Ces1b/Hsd17b7/Fgf1/Vldlr/Lrp1/Idh1/Cebpa/Fdx1/Sqle/Aco2/Idh2/Sc5d/Cyb5r3/Nfe2l1	15	GO_BP	up
GO:0033865	nucleoside bisphosphate metabolic process	12/1210	116/28891	0.00345806	0.027971	0.0205123	Ces1d/Pdk4/Acot1/Vdac1/Ppcs/Coasy/Crot/Papss1/Pdhb/Mpc1/Mcee/Suclg1	12	GO_BP	up
GO:0033875	ribonucleoside bisphosphate metabolic process	12/1210	116/28891	0.00345806	0.027971	0.0205123	Ces1d/Pdk4/Acot1/Vdac1/Ppcs/Coasy/Crot/Papss1/Pdhb/Mpc1/Mcee/Suclg1	12	GO_BP	up
GO:0034032	purine nucleoside bisphosphate metabolic process	12/1210	116/28891	0.00345806	0.027971	0.0205123	Ces1d/Pdk4/Acot1/Vdac1/Ppcs/Coasy/Crot/Papss1/Pdhb/Mpc1/Mcee/Suclg1	12	GO_BP	up
GO:0001893	maternal placenta development	6/1210	36/28891	0.00353231	0.0284455	0.0208603	Cited2/Ndrg3/Tmed2/Ctsl/Junb/Mapk3	6	GO_BP	up
GO:0010614	negative regulation of cardiac muscle hypertrophy	6/1210	36/28891	0.00353231	0.0284455	0.0208603	Rgs4/Trim63/Fbxo32/Notch1/Gsk3a/Glrx3	6	GO_BP	up
GO:0090114	COPII-coated vesicle budding	6/1210	36/28891	0.00353231	0.0284455	0.0208603	Sec13/Trappc2/Trappc4/Trappc2l/Vapa/Sar1b	6	GO_BP	up
GO:1904037	positive regulation of epithelial cell apoptotic process	7/1210	48/28891	0.00364214	0.0292481	0.0214489	Rgcc/Gsn/Capn10/Pdcd4/Bax/Col18a1/Eif2s1	7	GO_BP	up
GO:2001237	negative regulation of extrinsic apoptotic signaling pathway	11/1210	102/28891	0.00364266	0.0292481	0.0214489	Fyn/Ripk1/Hmgb2/Gclc/Cx3cl1/Il7/Prdx2/Mcl1/Cttn/Gclm/Tcf7l2	11	GO_BP	up
GO:0010212	response to ionizing radiation	13/1210	132/28891	0.00367852	0.0294619	0.0216057	Cdkn1a/Hras/Aen/Ccnd2/Gadd45a/Rhob/Tmem109/Net1/Bax/Zmpste24/Xrcc5/Grb2/Gtf2h5	13	GO_BP	up
GO:0043281	regulation of cysteine-type endopeptidase activity involved in apoptotic process	18/1210	212/28891	0.00368005	0.0294619	0.0216057	Sfn/F3/Dapk1/Gsn/Cdkn2d/Casp8/Cycs/Ctsd/Arl6ip5/Dnajb6/Gas6/Bax/Rps27l/Hspd1/Bcap31/Fis1/Anp32b/Rnf7	18	GO_BP	up
GO:0002792	negative regulation of peptide secretion	9/1210	74/28891	0.0036906	0.0295033	0.021636	Kcnj6/Gnao1/Pim3/Nucb2/Ucp2/Hadh/Ptpmt1/Anxa5/Eny2	9	GO_BP	up
GO:0019682	glyceraldehyde-3-phosphate metabolic process	4/1210	16/28891	0.0037196	0.0296054	0.021711	Tkt/Mdh2/Gapdh/Taldo1	4	GO_BP	up
GO:0032782	bile acid secretion	4/1210	16/28891	0.0037196	0.0296054	0.021711	Ces1d/Ces1b/Nherf1/Stard10	4	GO_BP	up
GO:0040034	regulation of development, heterochronic	4/1210	16/28891	0.0037196	0.0296054	0.021711	Serpine2/Jag1/Notch1/Hes1	4	GO_BP	up
GO:0042445	hormone metabolic process	20/1210	246/28891	0.00374925	0.0297981	0.0218522	Kcnj6/Crabp2/Selenom/Ece1/Duoxa1/Aldh1a3/Hsd17b7/Srd5a1/Pcsk6/Stc2/Fdx1/Ctsl/Atp1a1/Hsp90b1/Nfkb1/Stub1/Zmpste24/P4hb/Comt/Tcf7l2	20	GO_BP	up
GO:1905953	negative regulation of lipid localization	8/1210	61/28891	0.00379815	0.030143	0.0221052	Ces1d/Ces1b/Pnpla2/Nfkbia/Abhd5/Hbp1/Nr1h2/Fis1	8	GO_BP	up
GO:0099504	synaptic vesicle cycle	19/1210	230/28891	0.00391377	0.0310156	0.0227451	Sncb/Cd24a/Rab3a/Rapgef4/Atp6v1e1/Atp6v1g1/Napa/Cdk5/Kcnh1/Snapin/Actg1/Arf6/Atp6v1d/Ppp3r1/Stx11/Bin1/Snap47/Atp6v1f/Ap2s1	19	GO_BP	up
GO:1902414	protein localization to cell junction	13/1210	133/28891	0.00392472	0.0310575	0.0227758	Gpc6/Rapgef4/Hspb1/Hras/Ildr1/Lsr/Cdk5/Actg1/Kif5b/Snap47/Rab11a/Lamtor3/Lamtor2	13	GO_BP	up
GO:0070661	leukocyte proliferation	30/1210	425/28891	0.00398723	0.0315066	0.0231052	Il33/Cd24a/Arg2/Clu/Cdkn1a/Fyn/Bmi1/Cd81/Cd274/Cebpb/H2-DMb1/Dhps/Hes1/Irf1/Prkcd/Cx3cl1/Sdc4/Tcf3/Il7/Prkar1a/Prdx2/Junb/Mapk3/Cd151/Bax/Mif/Hspd1/Nfix/Fkbp1a/Selenok	30	GO_BP	up
GO:0000027	ribosomal large subunit assembly	5/1210	26/28891	0.00403199	0.0317229	0.0232638	Brix1/Mrto4/Rrs1/Mrpl20/Rplp0	5	GO_BP	up
GO:0070168	negative regulation of biomineral tissue development	5/1210	26/28891	0.00403199	0.0317229	0.0232638	Hey1/Notch1/Rflnb/Sox9/Gas6	5	GO_BP	up
GO:1902176	negative regulation of oxidative stress-induced intrinsic apoptotic signaling pathway	5/1210	26/28891	0.00403199	0.0317229	0.0232638	Fyn/Hspb1/Bag5/Nfe2l2/Atf4	5	GO_BP	up
GO:0030641	regulation of cellular pH	10/1210	89/28891	0.00405752	0.0317865	0.0233104	Aqp11/Tmem199/Rab20/Snapin/Clic4/Rnasek/Mapk3/Mafg/Lacc1/Atp6v0c	10	GO_BP	up
GO:0040014	regulation of multicellular organism growth	10/1210	89/28891	0.00405752	0.0317865	0.0233104	Gdf15/Nppc/Foxs1/Pls1/Stc2/Atp8a2/Adrb1/Ezr/Zmpste24/Spr	10	GO_BP	up
GO:0031670	cellular response to nutrient	6/1210	37/28891	0.00406908	0.0317865	0.0233104	Kat2b/Usf2/Mlx/Pim1/Gas6/Csnk1a1	6	GO_BP	up
GO:0034389	lipid droplet organization	6/1210	37/28891	0.00406908	0.0317865	0.0233104	Smim22/Pnpla2/Sqle/Cds1/Rab18/Faf2	6	GO_BP	up
GO:0090313	regulation of protein targeting to membrane	6/1210	37/28891	0.00406908	0.0317865	0.0233104	Fyn/Hras/Cib1/Gdi1/Cdk5/Fis1	6	GO_BP	up
GO:0007339	binding of sperm to zona pellucida	7/1210	49/28891	0.00409847	0.0318344	0.0233455	Cct7/B4galt1/Vdac2/Cct2/Tcp1/Cct6a/Cct8	7	GO_BP	up
GO:0034198	cellular response to amino acid starvation	7/1210	49/28891	0.00409847	0.0318344	0.0233455	Dapl1/Cdkn1a/Mapk3/Atf4/Rraga/Sh3glb1/Eif2s1	7	GO_BP	up
GO:1900077	negative regulation of cellular response to insulin stimulus	7/1210	49/28891	0.00409847	0.0318344	0.0233455	Ptpre/Grk2/Nucb2/Prkcd/Socs1/Gsk3a/Pip4k2c	7	GO_BP	up
GO:1905521	regulation of macrophage migration	7/1210	49/28891	0.00409847	0.0318344	0.0233455	Cd81/Cd9/Mdk/Cx3cl1/Akirin1/Mapk3/Mif	7	GO_BP	up
GO:0070301	cellular response to hydrogen peroxide	8/1210	62/28891	0.00420411	0.0325787	0.0238914	Fyn/Ripk1/Nqo1/Rhob/Prkcd/Net1/Nfe2l2/Hdac2	8	GO_BP	up
GO:0042326	negative regulation of phosphorylation	27/1210	372/28891	0.00422205	0.0325787	0.0238914	Ocln/Cdkn1a/Grk2/Hspb1/Cdkn2c/Ubash3b/Trib1/Gadd45b/Cib1/Gadd45a/Cdkn2d/Irf1/Akt1s1/Ppp5c/Prkcd/Socs1/Tsg101/Dnajc3/Tmed2/Zbed3/Kat2b/Prkar1a/Bax/Cdkn1b/Pik3ip1/Dynll1/Pebp1	27	GO_BP	up
GO:0009100	glycoprotein metabolic process	26/1210	354/28891	0.00422525	0.0325787	0.0238914	Il33/Hs3st6/Aqp11/Galnt14/Pcsk6/B3gnt2/Phlda1/Galnt2/Itm2c/Itm2b/B4galt1/Ganc/Ugdh/B3galt5/Slc35b2/C1galt1c1/Ddost/Ctsl/Aga/Hexb/Fbxo6/Gfpt1/Mlec/Tmem59/Hgsnat/Tcf7l2	26	GO_BP	up
GO:0070588	calcium ion transmembrane transport	26/1210	354/28891	0.00422525	0.0325787	0.0238914	Atp1b1/Rgs9/Fyn/Tmem38a/Stac/Cxcl10/Adrb1/Ubash3b/Maip1/Tmbim6/Trpm3/Cdk5/Vdac1/S100a1/Stim2/Cx3cl1/Ubqln1/1810037I17Rik/Ppp3r1/Gas6/Bax/Bin1/Calm3/Ghitm/Calm1/Fkbp1a	26	GO_BP	up
GO:0042274	ribosomal small subunit biogenesis	11/1210	104/28891	0.00422999	0.0325787	0.0238914	Tsr3/Rrs1/Utp11/Rps27l/Rps19bp1/Xrcc5/Fcf1/Rps11/Imp3/Mrps7/Gtf2h5	11	GO_BP	up
GO:0045185	maintenance of protein location	11/1210	104/28891	0.00422999	0.0325787	0.0238914	Grk2/Gsn/Kdelr2/Cdk5/Nfkbia/Get4/Rer1/Tmed2/Skp1/Hspa5/Twf1	11	GO_BP	up
GO:0006354	DNA-templated transcription elongation	12/1210	119/28891	0.00425829	0.0326555	0.0239477	Tcea3/Med31/Paf1/Adrm1/Med30/Med7/Leo1/Med28/Med19/Polr2i/Ddx39b/Gtf2h5	12	GO_BP	up
GO:0010657	muscle cell apoptotic process	12/1210	119/28891	0.00425829	0.0326555	0.0239477	Fbxo32/Grk2/Nupr1/Dynlt1f/Acot1/Mdk/Dynlt1c/Gapdh/Nfe2l2/Pcmt1/Pdcd4/Atf4	12	GO_BP	up
GO:0035282	segmentation	12/1210	119/28891	0.00425829	0.0326555	0.0239477	Irx3/Meox1/Nrarp/Pcsk6/Sema3f/Six1/Notch1/Dmrt2/Tmed2/Taf10/Pax1/Abi1	12	GO_BP	up
GO:0007519	skeletal muscle tissue development	18/1210	215/28891	0.00426382	0.0326555	0.0239477	Cav2/Nupr1/Six1/Klf5/Heyl/Notch1/Gpcpd1/Cited2/Cdk5/Btg2/Ybx3/Akirin1/Psma6/Flot1/Nras/Tcf7l2/Hmg20b/Nfix	18	GO_BP	up
GO:0031623	receptor internalization	14/1210	150/28891	0.00428851	0.0327988	0.0240528	Cd81/Grk2/Plk2/Cd9/Pick1/Ezr/Sh3glb2/Flot1/Ppp3r1/Rala/Arf1/Ralb/Grb2/Ap2s1	14	GO_BP	up
GO:0032680	regulation of tumor necrosis factor production	18/1210	216/28891	0.00447458	0.0341741	0.0250613	Il33/Cd24a/Arg2/Clu/Spon2/Hspb1/Arid5a/Selenos/Ripk1/Rara/Akap12/Zfp36/Cx3cl1/Gas6/Mif/Hdac2/Hspd1/Selenok	18	GO_BP	up
GO:0051651	maintenance of location in cell	20/1210	250/28891	0.00448751	0.0342251	0.0250988	Bdh2/Grk2/Tmem38a/Cxcl10/Ubash3b/Gsn/Kdelr2/Cdk5/Rer1/Tmed2/Cx3cl1/Skp1/Hexb/Hspa5/Bax/Calm3/Ghitm/Twf1/Calm1/Fkbp1a	20	GO_BP	up
GO:0021987	cerebral cortex development	12/1210	120/28891	0.00455576	0.0346491	0.0254097	Mdk/Phactr1/Tubb2b/Tuba1a/Cdk5/Lamb1/Mdga1/Rac1/Bax/Akirin2/Nfix/Rnf7	12	GO_BP	up
GO:0055006	cardiac cell development	12/1210	120/28891	0.00455576	0.0346491	0.0254097	Rgs4/Sorbs2/Nebl/Jag1/Adrb1/Notch1/Gsk3a/Pdcd4/Pin1/Zmpste24/Hdac2/Ddx39b	12	GO_BP	up
GO:0010332	response to gamma radiation	7/1210	50/28891	0.0045968	0.0348643	0.0255675	Cdkn1a/Hras/Tmem109/Bax/Zmpste24/Xrcc5/Gtf2h5	7	GO_BP	up
GO:0032210	regulation of telomere maintenance via telomerase	7/1210	50/28891	0.0045968	0.0348643	0.0255675	Cct7/Mapk3/Cct2/Tcp1/Xrcc5/Cct6a/Cct8	7	GO_BP	up
GO:0071384	cellular response to corticosteroid stimulus	8/1210	63/28891	0.00464266	0.0351635	0.0257869	Trim63/Fbxo32/Fam107a/Sgk1/Zfp36/Gsk3a/Eif4e/Ube2l3	8	GO_BP	up
GO:0007212	dopamine receptor signaling pathway	6/1210	38/28891	0.00466383	0.0351779	0.0257975	Cav2/Gnao1/Rgs4/Rgs9/Nherf1/Gna11	6	GO_BP	up
GO:0014741	negative regulation of muscle hypertrophy	6/1210	38/28891	0.00466383	0.0351779	0.0257975	Rgs4/Trim63/Fbxo32/Notch1/Gsk3a/Glrx3	6	GO_BP	up
GO:0017004	cytochrome complex assembly	6/1210	38/28891	0.00466383	0.0351779	0.0257975	Cox17/Cox19/Uqcc6/Slc25a46/Uqcc4/Cox14	6	GO_BP	up
GO:0046394	carboxylic acid biosynthetic process	24/1210	321/28891	0.00468614	0.0352902	0.0258799	Olah/Ces1d/Ces1b/Pdk4/Aldh1a3/Edn2/Upb1/Got1/Hacd2/Psph/Pycr2/Sephs2/Elovl7/Ugdh/Prxl2b/Elovl6/Aasdhppt/Ndufab1/Psat1/Kat2b/Glul/Mif/Nr1h2/Akr1a1	24	GO_BP	up
GO:0010755	regulation of plasminogen activation	4/1210	17/28891	0.00470451	0.0352902	0.0258799	Plat/Serpine2/S100a10/Plgrkt	4	GO_BP	up
GO:0061308	cardiac neural crest cell development involved in heart development	4/1210	17/28891	0.00470451	0.0352902	0.0258799	Jag1/Hes1/Cited2/Mapk3	4	GO_BP	up
GO:2000047	regulation of cell-cell adhesion mediated by cadherin	4/1210	17/28891	0.00470451	0.0352902	0.0258799	Rgcc/Notch1/Flot1/Epcam	4	GO_BP	up
GO:0050851	antigen receptor-mediated signaling pathway	16/1210	184/28891	0.00474637	0.0355176	0.0260466	Skint3/Fyb/Fyn/Cd81/Nectin2/Hras/Eif2b3/Fyb2/Nfkbia/Ezr/Nfkb1/Eif2b2/Nras/Bax/Ube2n/Grb2	16	GO_BP	up
GO:0045665	negative regulation of neuron differentiation	10/1210	91/28891	0.00475945	0.0355176	0.0260466	Irx3/Cd24a/Isl2/Hey1/Jag1/Notch1/Hes1/Sox9/Eif4e/Lsm1	10	GO_BP	up
GO:0009264	deoxyribonucleotide catabolic process	5/1210	27/28891	0.00478022	0.0355176	0.0260466	Dera/Urah/Upb1/Dut/Nudt18	5	GO_BP	up
GO:0016226	iron-sulfur cluster assembly	5/1210	27/28891	0.00478022	0.0355176	0.0260466	Ciao2b/Ndufab1/Glrx3/Isca2/Iscu	5	GO_BP	up
GO:0031163	metallo-sulfur cluster assembly	5/1210	27/28891	0.00478022	0.0355176	0.0260466	Ciao2b/Ndufab1/Glrx3/Isca2/Iscu	5	GO_BP	up
GO:0051016	barbed-end actin filament capping	5/1210	27/28891	0.00478022	0.0355176	0.0260466	Capg/Gsn/Twf1/Capzb/Mtpn	5	GO_BP	up
GO:0098901	regulation of cardiac muscle cell action potential	5/1210	27/28891	0.00478022	0.0355176	0.0260466	Dsc2/Bin1/Calm3/Calm1/Jup	5	GO_BP	up
GO:0051100	negative regulation of binding	15/1210	168/28891	0.00481708	0.0356755	0.0261624	Cdkn1a/Plk2/Hey1/Tmbim6/Ppp1r2/Pex19/Psme3ip1/1810037I17Rik/Pin1/Stub1/Mapk3/Bax/Gtpbp4/Hdac2/Ralb	15	GO_BP	up
GO:0042246	tissue regeneration	9/1210	77/28891	0.00482101	0.0356755	0.0261624	Cdkn1a/Cd81/Cd9/Klf5/Mdk/Ifrd1/Akirin1/Cdkn1b/Nfix	9	GO_BP	up
GO:2000573	positive regulation of DNA biosynthetic process	9/1210	77/28891	0.00482101	0.0356755	0.0261624	Rgcc/Cct7/Mapk3/Cct2/Tcp1/Xrcc5/Cct6a/Ddx39b/Cct8	9	GO_BP	up
GO:0006479	protein methylation	11/1210	106/28891	0.00489029	0.036042	0.0264312	Prdm6/H1f2/Eef1akmt2/Eed/Btg2/Kmt5a/Rab6a/Kat8/Pcmt1/Prmt1/Snrpd3	11	GO_BP	up
GO:0006885	regulation of pH	11/1210	106/28891	0.00489029	0.036042	0.0264312	Pdk4/Aqp11/Tmem199/Rab20/Snapin/Clic4/Rnasek/Mapk3/Mafg/Lacc1/Atp6v0c	11	GO_BP	up
GO:0008213	protein alkylation	11/1210	106/28891	0.00489029	0.036042	0.0264312	Prdm6/H1f2/Eef1akmt2/Eed/Btg2/Kmt5a/Rab6a/Kat8/Pcmt1/Prmt1/Snrpd3	11	GO_BP	up
GO:0031032	actomyosin structure organization	18/1210	218/28891	0.00492184	0.0362051	0.0265508	Kctd13/Krt19/Rgcc/Nebl/Racgap1/Phactr1/Neurl2/Rtkn/Krt8/Rhoc/S100a10/Sdc4/Rac1/Prkar1a/Actg1/Pdlim1/Cnn3/Hdac2	18	GO_BP	up
GO:0050679	positive regulation of epithelial cell proliferation	19/1210	235/28891	0.00493079	0.0362051	0.0265508	Cav2/Pgf/F3/Nrarp/Ppp1r16b/Hras/Fgf1/Hmgb2/Ccnd2/Mdk/Notch1/B4galt1/Pdcl3/Sox9/Kdm5b/Glul/Nras/Col18a1/Tcf7l2	19	GO_BP	up
GO:0019221	cytokine-mediated signaling pathway	31/1210	450/28891	0.00493225	0.0362051	0.0265508	Il33/Cxcl1/Cd24a/Grem2/F3/Edn2/Cxcl10/Ripk1/Iigp1/Notch1/Cib1/Cebpa/Irf1/Krt18/Socs1/Nfkbia/Stk39/Klf6/Krt8/Nkiras1/Cx3cl1/Il7/Csnk2b/Mapk3/Adipor1/Gas6/Slc27a1/Rraga/Zc3h15/Rbm47/Fkbp1a	31	GO_BP	up
GO:0006887	exocytosis	28/1210	395/28891	0.00499191	0.036594	0.026836	Gnao1/Rab3a/Nppc/Rab25/Rapgef4/Atp13a2/Tnfaip2/Rab13/Rab3ip/Notch1/Napa/Exoc7/Syngr1/Cdk5/Tsg101/Kcnh1/Rab15/S100a10/Sdc4/Snapin/Tmem167/Stx11/Snap47/Rala/Arf1/Ralb/Rab11a/Lin7c	28	GO_BP	up
GO:0007030	Golgi organization	13/1210	137/28891	0.00504609	0.0369417	0.0270909	Blzf1/Bag5/Lman1/Tmed2/Uso1/Stk25/Mapk3/Ubxn2a/Nsfl1c/Tmed4/Gorasp2/Csnk1a1/Rab2a	13	GO_BP	up
GO:0010721	negative regulation of cell development	24/1210	323/28891	0.00505702	0.0369723	0.0271134	Cd24a/Nppc/Nrarp/Nkx6-2/Hspb1/Sema3f/Ubash3b/Mdk/Trib1/Rara/Notch1/Hes1/Cebpa/Cers2/Irf1/Rflnb/Gdi1/Cdk5/Btg2/Socs1/Ifrd1/Tsc22d1/Idh2/Prdx2	24	GO_BP	up
GO:0006446	regulation of translational initiation	8/1210	64/28891	0.00511546	0.0372138	0.0272905	Polr2g/Dnajc3/Rbm4/Tmed2/Eif5/Eif3k/Paip2/Eif2s1	8	GO_BP	up
GO:0060324	face development	8/1210	64/28891	0.00511546	0.0372138	0.0272905	Aldh1a3/Rara/Mmp2/Pax9/Zfand5/Mapk3/Cdk2ap1/Tcf7l2	8	GO_BP	up
GO:0043547	positive regulation of GTPase activity	20/1210	253/28891	0.00511687	0.0372138	0.0272905	Cav2/Gnao1/Rgs4/Rgs10/Rgs9/Rapgef4/Hras/Arhgap24/Adrb1/Tbc1d15/Tbc1d10a/Net1/S100a10/Cx3cl1/Mtss2/Pin1/Ralbp1/Eif5/Bin1/Zc3h15	20	GO_BP	up
GO:0016601	Rac protein signal transduction	7/1210	51/28891	0.00513945	0.0372138	0.0272905	Rhou/Arhgap24/Dynlt1f/Ssx2ip/Dynlt1c/Rac1/Arf6	7	GO_BP	up
GO:0042542	response to hydrogen peroxide	10/1210	92/28891	0.00514442	0.0372138	0.0272905	Fyn/Ripk1/Mmp2/Nqo1/Rhob/Prkcd/Net1/Nfe2l2/Stk25/Hdac2	10	GO_BP	up
GO:0050709	negative regulation of protein secretion	10/1210	92/28891	0.00514442	0.0372138	0.0272905	Kcnj6/Gnao1/Pim3/Ucp2/Hadh/Frmd4a/Idh2/Ptpmt1/Anxa5/Eny2	10	GO_BP	up
GO:1901019	regulation of calcium ion transmembrane transporter activity	10/1210	92/28891	0.00514442	0.0372138	0.0272905	Atp1b1/Stac/Cdk5/S100a1/Stim2/Ubqln1/1810037I17Rik/Calm3/Calm1/Fkbp1a	10	GO_BP	up
GO:1903432	regulation of TORC1 signaling	10/1210	92/28891	0.00514442	0.0372138	0.0272905	Akt1s1/Sec13/Pim1/Mapk3/Rbx1/Rraga/Ube2n/Lamtor3/Csnk1a1/Lamtor2	10	GO_BP	up
GO:0055001	muscle cell development	19/1210	236/28891	0.00515823	0.0372645	0.0273277	Cav2/Rgs4/Sorbs2/Krt19/Nebl/Adrb1/Six1/Notch1/Hes1/Neurl2/Gsk3a/Krt8/Prkar1a/Actg1/Pin1/Bin1/Zmpste24/Hdac2/Ddx39b	19	GO_BP	up
GO:0009314	response to radiation	30/1210	433/28891	0.00518496	0.0374083	0.0274331	Rgs9/Cdkn1a/Hras/Atp8a2/Aen/Pde6d/Ccnd2/Sgk1/Mmp2/Gadd45a/Rhob/Cdkn2d/Tmem109/Tuba1a/H2ac25/Cdk5/Prkcd/Rbm4/Net1/Dynlrb1/Rbx1/Trp53inp1/Bax/Ube2b/Zmpste24/Xrcc5/Ift20/Grb2/Gtf2h5/Eif2s1	30	GO_BP	up
GO:0071346	cellular response to type II interferon	12/1210	122/28891	0.00520049	0.0374709	0.027479	Capg/Cdc42ep2/Dapk1/Gsn/Irf1/Cx3cl1/Rab20/Actg1/Gapdh/Kif5b/Stx11/Calm1	12	GO_BP	up
GO:0060993	kidney morphogenesis	11/1210	107/28891	0.00524969	0.0377386	0.0276754	Irx3/Pgf/Fgf1/Hey1/Six1/Fmn1/Hes1/Lzts2/Sox4/Sox9/Zmpste24	11	GO_BP	up
GO:0016053	organic acid biosynthetic process	24/1210	324/28891	0.00525143	0.0377386	0.0276754	Olah/Ces1d/Ces1b/Pdk4/Aldh1a3/Edn2/Upb1/Got1/Hacd2/Psph/Pycr2/Sephs2/Elovl7/Ugdh/Prxl2b/Elovl6/Aasdhppt/Ndufab1/Psat1/Kat2b/Glul/Mif/Nr1h2/Akr1a1	24	GO_BP	up
GO:0071383	cellular response to steroid hormone stimulus	16/1210	186/28891	0.00526349	0.0377757	0.0277026	Trim63/Fbxo32/Fam107a/Heyl/Sgk1/Zfp36/Fkbp4/Ppp5c/Gsk3a/Wbp2/Atp1a1/Calcoco1/Tmf1/Eif4e/Ube2l3/Uba5	16	GO_BP	up
GO:0050868	negative regulation of T cell activation	13/1210	138/28891	0.00536314	0.0384405	0.0281901	Dapl1/Cd24a/Arg2/Nrarp/Hspb1/Cd274/Cebpb/Mdk/Irf1/Socs1/Sdc4/Prkar1a/Prdx2	13	GO_BP	up
GO:0045765	regulation of angiogenesis	23/1210	307/28891	0.00542008	0.0387978	0.0284521	Camp/Pgf/F3/Ppp1r16b/Plk2/Dcn/Hspb1/Rgcc/Fgf1/Pak4/Tnfrsf12a/Cxcl10/Ccm2/Mdk/Gadd45a/Rhob/S100a1/Pdcl3/Rnh1/Glul/Nfe2l2/Nras/Jup	23	GO_BP	up
GO:0071900	regulation of protein serine/threonine kinase activity	25/1210	343/28891	0.0054565	0.0390076	0.0286059	Cd24a/Tcim/Sfn/Cdkn1a/Hras/Rgcc/Fgf1/Ccnd2/Trib2/Cdkn2c/Trib1/Cib1/Gadd45a/Cdkn2d/Prkcd/Map3k1/Tsg101/Kat2b/Prkar1a/Pim1/Mif/Gtpbp4/Cdkn1b/Ralb/Hsp90ab1	25	GO_BP	up
GO:0050792	regulation of viral process	16/1210	187/28891	0.0055387	0.0395436	0.028999	Tmprss2/Nectin2/Dynlt1f/Isg20/Gsn/Notch1/Zfp36/Dynlt1c/Map3k1/Tsg101/Trim8/Snx3/Csnk2b/Bsg/P4hb/Ly6e	16	GO_BP	up
GO:0035020	regulation of Rac protein signal transduction	5/1210	28/28891	0.00562191	0.0399325	0.0292842	Arhgap24/Dynlt1f/Ssx2ip/Dynlt1c/Arf6	5	GO_BP	up
GO:0035384	thioester biosynthetic process	5/1210	28/28891	0.00562191	0.0399325	0.0292842	Pdk4/Vdac1/Ppcs/Pdhb/Mpc1	5	GO_BP	up
GO:0071616	acyl-CoA biosynthetic process	5/1210	28/28891	0.00562191	0.0399325	0.0292842	Pdk4/Vdac1/Ppcs/Pdhb/Mpc1	5	GO_BP	up
GO:0045682	regulation of epidermis development	8/1210	65/28891	0.00562418	0.0399325	0.0292842	Sfn/Grhl1/Hey1/Nab2/Notch1/Hes1/Zfp36/Mafg	8	GO_BP	up
GO:0061640	cytoskeleton-dependent cytokinesis	11/1210	108/28891	0.00562963	0.0399325	0.0292842	Racgap1/Dctn3/Rhob/Exoc7/Rtkn/Chmp4c/Chmp1b/Chmp5/Rhoc/Arf1/Septin7	11	GO_BP	up
GO:0034250	positive regulation of amide metabolic process	15/1210	171/28891	0.00566475	0.0400778	0.0293908	Clu/Serp1/Polr2g/Prkcd/Gsk3a/Dnajc3/Rbm4/Sox4/Nfe2l2/Prmt1/Mapk3/Csnk1e/Rps27l/Ddx39b/Eef2	15	GO_BP	up
GO:2001236	regulation of extrinsic apoptotic signaling pathway	15/1210	171/28891	0.00566475	0.0400778	0.0293908	Fyn/Tnfrsf12a/Ripk1/Hmgb2/Itm2c/Casp8/Gclc/Ltbr/Cx3cl1/Il7/Prdx2/Mcl1/Cttn/Gclm/Tcf7l2	15	GO_BP	up
GO:0051090	regulation of DNA-binding transcription factor activity	30/1210	436/28891	0.00570583	0.0403116	0.0295622	Clu/Foxs1/Nupr1/Rgcc/Ripk1/Heyl/Trib2/Trib1/Hes1/Cib1/Rnf2/Nfkbia/Trim8/Ifrd1/Cx3cl1/Rnf25/Tcf3/Cebpg/Prdx2/Pim1/Hmgn3/Psma6/Mapk3/Flot1/Hdac2/Ube2n/Tcf7l2/Jup/Nfix/Mtpn	30	GO_BP	up
GO:0014009	glial cell proliferation	9/1210	79/28891	0.00571253	0.0403116	0.0295622	Il33/Clu/Notch1/Hes1/Cers2/Cx3cl1/Sox4/Idh2/Nfix	9	GO_BP	up
GO:0014037	Schwann cell differentiation	7/1210	52/28891	0.00572881	0.0403744	0.0296083	Hras/Nab2/Cdk5/Slc25a46/Mapk3/Ppp3r1/Grb2	7	GO_BP	up
GO:0051302	regulation of cell division	16/1210	188/28891	0.00582547	0.0407082	0.0298531	Pgf/Sfn/Fgf1/Racgap1/Mdk/Garem1/Gipc1/Cib1/Cdk2ap2/Becn1/Chmp4c/Pin1/Calm3/Sh3glb1/Calm1/Rab11a	16	GO_BP	up
GO:0002862	negative regulation of inflammatory response to antigenic stimulus	4/1210	18/28891	0.00585051	0.0407082	0.0298531	Gpx2/Selenos/Psmb4/Psma1	4	GO_BP	up
GO:0019430	removal of superoxide radicals	4/1210	18/28891	0.00585051	0.0407082	0.0298531	Nqo1/Prdx2/Nfe2l2/Prdx1	4	GO_BP	up
GO:0031268	pseudopodium organization	4/1210	18/28891	0.00585051	0.0407082	0.0298531	Gm14137/Rab25/Cdc42ep2/Septin7	4	GO_BP	up
GO:0032966	negative regulation of collagen biosynthetic process	4/1210	18/28891	0.00585051	0.0407082	0.0298531	Nppc/Got1/Cygb/Notch1	4	GO_BP	up
GO:0046755	viral budding	4/1210	18/28891	0.00585051	0.0407082	0.0298531	Tsg101/Chmp4c/Chmp1b/Chmp5	4	GO_BP	up
GO:0061179	negative regulation of insulin secretion involved in cellular response to glucose stimulus	4/1210	18/28891	0.00585051	0.0407082	0.0298531	Pim3/Ucp2/Ptpmt1/Eny2	4	GO_BP	up
GO:0061307	cardiac neural crest cell differentiation involved in heart development	4/1210	18/28891	0.00585051	0.0407082	0.0298531	Jag1/Hes1/Cited2/Mapk3	4	GO_BP	up
GO:0062099	negative regulation of programmed necrotic cell death	4/1210	18/28891	0.00585051	0.0407082	0.0298531	Nupr1/Ripk1/Casp8/Ybx3	4	GO_BP	up
GO:0097401	synaptic vesicle lumen acidification	4/1210	18/28891	0.00585051	0.0407082	0.0298531	Atp6v1e1/Atp6v1g1/Atp6v1d/Atp6v1f	4	GO_BP	up
GO:0043087	regulation of GTPase activity	25/1210	345/28891	0.00586446	0.0407535	0.0298863	Cav2/Gnao1/Rgs4/Rgs10/Rgs9/Rapgef4/Hras/Arhgap24/Dynlt1f/Adrb1/Trappc6b/Tbc1d15/Tbc1d10a/Dynlt1c/Net1/Tmed2/S100a10/Cx3cl1/Mtss2/Pin1/Ralbp1/Eif5/Bin1/Zc3h15/Eif2s1	25	GO_BP	up
GO:0045786	negative regulation of cell cycle	28/1210	400/28891	0.00590194	0.040962	0.0300392	Nppc/Cdkn1a/Nupr1/Nherf1/Hpgd/Prpf19/Rgcc/Fam107a/Cdkn2c/Cebpa/Rhob/Cdkn2d/Cdk5/Ier3/Btg2/Cdk2ap2/Chmp4c/Zwint/Tiprl/Dync1li1/Kat2b/Timp2/Btg3/Rps27l/Crlf3/Cdkn1b/Syf2/Ddx39b	28	GO_BP	up
GO:1903035	negative regulation of response to wounding	10/1210	94/28891	0.00598725	0.0415015	0.0304348	Plat/Il33/Cd24a/Serpine2/Cd9/Ubash3b/Mdk/Cers2/Prkcd/Anxa5	10	GO_BP	up
GO:0009062	fatty acid catabolic process	11/1210	109/28891	0.0060309	0.041586	0.0304968	Bdh2/Ces1d/Auh/Slc25a17/Hadh/Etfa/Eci1/Crot/Hadhb/Hadha/Echs1	11	GO_BP	up
GO:0043267	negative regulation of potassium ion transport	6/1210	40/28891	0.00604148	0.041586	0.0304968	Rgs4/Nedd4l/Stk39/Bin1/Atf4/Snx27	6	GO_BP	up
GO:0086004	regulation of cardiac muscle cell contraction	6/1210	40/28891	0.00604148	0.041586	0.0304968	Stc1/Adrb1/Atp1a1/Dsc2/Bin1/Jup	6	GO_BP	up
GO:0090162	establishment of epithelial cell polarity	6/1210	40/28891	0.00604148	0.041586	0.0304968	Nherf1/Hey1/Hes1/Frmd4a/Arf6/Ift20	6	GO_BP	up
GO:0098868	bone growth	6/1210	40/28891	0.00604148	0.041586	0.0304968	Stc1/Rarb/Nppc/Rara/Sox9/Zmpste24	6	GO_BP	up
GO:0001889	liver development	13/1210	140/28891	0.006045	0.041586	0.0304968	Fgf1/Upb1/Cebpb/Mdk/Notch1/Hes1/Cebpa/Lsr/Cited2/Sox9/Arf6/Zmpste24/Taf10	13	GO_BP	up
GO:0043583	ear development	20/1210	257/28891	0.00606742	0.0416878	0.0305715	Ece1/Aldh1a3/Pls1/Nherf1/Atp8a2/Hey1/Jag1/Six1/Ccm2/Notch1/Hes1/Cebpa/Sdc4/Sox9/Rac1/Mapk3/Cdkn1b/Ift20/Nfix/Anp32b	20	GO_BP	up
GO:0030193	regulation of blood coagulation	8/1210	66/28891	0.00617053	0.0422901	0.0310132	Plat/Serpine2/Cd9/Ubash3b/Prkcd/Prdx2/Nfe2l2/Anxa5	8	GO_BP	up
GO:0060038	cardiac muscle cell proliferation	8/1210	66/28891	0.00617053	0.0422901	0.0310132	Fgf1/Ccnd2/Notch1/Cited2/Prkar1a/Pim1/Hdac2/Vgll4	8	GO_BP	up
GO:0032640	tumor necrosis factor production	18/1210	223/28891	0.00620217	0.0424095	0.0311007	Il33/Cd24a/Arg2/Clu/Spon2/Hspb1/Arid5a/Selenos/Ripk1/Rara/Akap12/Zfp36/Cx3cl1/Gas6/Mif/Hdac2/Hspd1/Selenok	18	GO_BP	up
GO:0009988	cell-cell recognition	9/1210	80/28891	0.00620343	0.0424095	0.0311007	Cd81/Cd9/Cct7/B4galt1/Vdac2/Cct2/Tcp1/Cct6a/Cct8	9	GO_BP	up
GO:1901342	regulation of vasculature development	23/1210	311/28891	0.00631168	0.0430957	0.0316039	Camp/Pgf/F3/Ppp1r16b/Plk2/Dcn/Hspb1/Rgcc/Fgf1/Pak4/Tnfrsf12a/Cxcl10/Ccm2/Mdk/Gadd45a/Rhob/S100a1/Pdcl3/Rnh1/Glul/Nfe2l2/Nras/Jup	23	GO_BP	up
GO:1904263	positive regulation of TORC1 signaling	7/1210	53/28891	0.00636724	0.0434209	0.0318425	Sec13/Pim1/Rbx1/Rraga/Lamtor3/Csnk1a1/Lamtor2	7	GO_BP	up
GO:0031333	negative regulation of protein-containing complex assembly	14/1210	157/28891	0.00639783	0.0435752	0.0319556	Clu/Capg/Sgk1/Gsn/Lmo4/Fkbp4/Vdac2/Prkcd/Sox9/Twf1/Capzb/Lamp2/Mtpn/Csnk1a1	14	GO_BP	up
GO:0061053	somite development	10/1210	95/28891	0.00644708	0.0437964	0.0321178	Meox1/Rad51b/Nrarp/Six1/Notch1/Dmrt2/Tmed2/Taf10/Pax1/Abi1	10	GO_BP	up
GO:1901379	regulation of potassium ion transmembrane transport	10/1210	95/28891	0.00644708	0.0437964	0.0321178	Rgs4/Atp1b1/Dpp10/Nedd4l/Pick1/Gnb2/Stk39/Atp1b3/Bin1/Snx27	10	GO_BP	up
GO:0031960	response to corticosteroid	11/1210	110/28891	0.00645429	0.0437964	0.0321178	Trim63/Cdo1/Fibin/Fbxo32/Fam107a/Sgk1/Zfp36/Gsk3a/Stk39/Eif4e/Ube2l3	11	GO_BP	up
GO:0002183	cytoplasmic translational initiation	5/1210	29/28891	0.00656289	0.0440962	0.0323376	Eif2b3/Eif2s2/Rbm4/Eif4a1/Eif5	5	GO_BP	up
GO:0006891	intra-Golgi vesicle-mediated transport	5/1210	29/28891	0.00656289	0.0440962	0.0323376	Copz2/Rab6a/Gabarapl2/Cope/Copg1	5	GO_BP	up
GO:0008535	respiratory chain complex IV assembly	5/1210	29/28891	0.00656289	0.0440962	0.0323376	Cox17/Cox19/Uqcc6/Slc25a46/Cox14	5	GO_BP	up
GO:0032469	endoplasmic reticulum calcium ion homeostasis	5/1210	29/28891	0.00656289	0.0440962	0.0323376	Tmbim6/Bax/Bcap31/Fis1/Selenok	5	GO_BP	up
GO:0090208	positive regulation of triglyceride metabolic process	5/1210	29/28891	0.00656289	0.0440962	0.0323376	Pnpla2/Abhd5/Slc27a1/Nr1h2/Tcf7l2	5	GO_BP	up
GO:1900745	positive regulation of p38MAPK cascade	5/1210	29/28891	0.00656289	0.0440962	0.0323376	Gsn/Gadd45b/Gadd45a/Rell1/Stk39	5	GO_BP	up
GO:1901380	negative regulation of potassium ion transmembrane transport	5/1210	29/28891	0.00656289	0.0440962	0.0323376	Rgs4/Nedd4l/Stk39/Bin1/Snx27	5	GO_BP	up
GO:1903319	positive regulation of protein maturation	5/1210	29/28891	0.00656289	0.0440962	0.0323376	Timm17a/Gsn/S100a10/Sox4/Plgrkt	5	GO_BP	up
GO:0051017	actin filament bundle assembly	15/1210	174/28891	0.00662887	0.0444849	0.0326227	Kctd13/Pls1/Rgcc/Fam107a/Phactr1/Map3k1/Ezr/Rhoc/S100a10/Cx3cl1/Sdc4/Rac1/Actg1/Pdlim1/Hsp90b1	15	GO_BP	up
GO:1905954	positive regulation of lipid localization	12/1210	126/28891	0.0067069	0.0449535	0.0329663	Ces1d/Ces1b/Atp8a2/Nucb2/Lrp1/Prkcd/Nfkbia/Tmf1/Mif/Nr1h2/Pltp/Tmem30a	12	GO_BP	up
GO:1990874	vascular associated smooth muscle cell proliferation	9/1210	81/28891	0.00672614	0.0450273	0.0330205	Cdkn1a/Grk2/Ndrg2/Spon2/Hpgd/Mmp2/Pdcd4/Cdkn1b/Ddx39b	9	GO_BP	up
GO:0008652	amino acid biosynthetic process	8/1210	67/28891	0.00675621	0.0451734	0.0331276	Upb1/Got1/Psph/Pycr2/Sephs2/Aasdhppt/Psat1/Glul	8	GO_BP	up
GO:0072089	stem cell proliferation	13/1210	142/28891	0.00679419	0.0453719	0.0332732	Cxcl1/Rarb/Sfn/Irf6/Hmgb2/Cdkn2c/Notch1/Cebpa/Tsc22d1/Sox9/Pim1/Epcam/Xrcc5	13	GO_BP	up
GO:0032506	cytokinetic process	6/1210	41/28891	0.00683151	0.0455656	0.0334152	Racgap1/Rtkn/Chmp4c/Chmp1b/Chmp5/Arf1	6	GO_BP	up
GO:0002690	positive regulation of leukocyte chemotaxis	11/1210	111/28891	0.00690062	0.0459706	0.0337122	Pla2g7/Pgf/Edn2/Cxcl10/Mdk/Stk39/Cx3cl1/Rac1/Akirin1/Mapk3/Gas6	11	GO_BP	up
GO:0043535	regulation of blood vessel endothelial cell migration	10/1210	96/28891	0.00693387	0.0460799	0.0337924	Plk2/Hspb1/Rgcc/Notch1/Cib1/Gadd45a/Csnk2b/Nfe2l2/Col18a1/Jup	10	GO_BP	up
GO:0051384	response to glucocorticoid	10/1210	96/28891	0.00693387	0.0460799	0.0337924	Trim63/Cdo1/Fibin/Fbxo32/Fam107a/Sgk1/Zfp36/Gsk3a/Eif4e/Ube2l3	10	GO_BP	up
GO:0001765	membrane raft assembly	3/1210	10/28891	0.00704796	0.0463321	0.0339773	Cav2/S100a10/Flot1	3	GO_BP	up
GO:0002934	desmosome organization	3/1210	10/28891	0.00704796	0.0463321	0.0339773	Grhl1/Perp/Jup	3	GO_BP	up
GO:0003330	regulation of extracellular matrix constituent secretion	3/1210	10/28891	0.00704796	0.0463321	0.0339773	Rgcc/Notch1/Ier3ip1	3	GO_BP	up
GO:0014908	myotube differentiation involved in skeletal muscle regeneration	3/1210	10/28891	0.00704796	0.0463321	0.0339773	Cd81/Cd9/Klf5	3	GO_BP	up
GO:0044571	[2Fe-2S] cluster assembly	3/1210	10/28891	0.00704796	0.0463321	0.0339773	Ndufab1/Glrx3/Iscu	3	GO_BP	up
GO:0045199	maintenance of epithelial cell apical/basal polarity	3/1210	10/28891	0.00704796	0.0463321	0.0339773	Nherf1/Pdzd11/Lin7c	3	GO_BP	up
GO:0045990	carbon catabolite regulation of transcription	3/1210	10/28891	0.00704796	0.0463321	0.0339773	Kat2b/Usf2/Mlx	3	GO_BP	up
GO:1902065	response to L-glutamate	3/1210	10/28891	0.00704796	0.0463321	0.0339773	Fyn/Tmbim6/Tuba1a	3	GO_BP	up
GO:1904350	regulation of protein catabolic process in the vacuole	3/1210	10/28891	0.00704796	0.0463321	0.0339773	Cd81/Atp13a2/Lrp1	3	GO_BP	up
GO:1990928	response to amino acid starvation	7/1210	54/28891	0.00705715	0.0463369	0.0339808	Dapl1/Cdkn1a/Mapk3/Atf4/Rraga/Sh3glb1/Eif2s1	7	GO_BP	up
GO:1902806	regulation of cell cycle G1/S phase transition	16/1210	192/28891	0.00709507	0.0465088	0.034107	Tcim/Cdkn1a/Rgcc/Fam107a/Ccnd2/Cdkn2c/Paf1/Cdkn2d/Cdk2ap2/Psme2/Tcf3/Smarcd2/Rps27l/Crlf3/Cdkn1b/Anp32b	16	GO_BP	up
GO:0032006	regulation of TOR signaling	14/1210	159/28891	0.0071325	0.0465088	0.034107	Akt1s1/Gsk3a/Sec13/Fbxo9/Pim1/Mapk3/Rbx1/Gas6/Zmpste24/Rraga/Ube2n/Lamtor3/Csnk1a1/Lamtor2	14	GO_BP	up
GO:0055007	cardiac muscle cell differentiation	14/1210	159/28891	0.0071325	0.0465088	0.034107	Irx3/Rarb/Rgs4/Sorbs2/Nebl/Adrb1/Ccnd2/Rara/Gsk3a/Pin1/Zmpste24/Hdac2/Ift20/Ddx39b	14	GO_BP	up
GO:0003184	pulmonary valve morphogenesis	4/1210	19/28891	0.00716827	0.0465088	0.034107	Hey1/Jag1/Heyl/Notch1	4	GO_BP	up
GO:0010713	negative regulation of collagen metabolic process	4/1210	19/28891	0.00716827	0.0465088	0.034107	Nppc/Got1/Cygb/Notch1	4	GO_BP	up
GO:0106070	regulation of adenylate cyclase-activating G protein-coupled receptor signaling pathway	4/1210	19/28891	0.00716827	0.0465088	0.034107	Grk2/Adrb1/Arrdc3/Gsk3a	4	GO_BP	up
GO:0110154	RNA decapping	4/1210	19/28891	0.00716827	0.0465088	0.034107	Noct/Zfp36/Nudt3/Lsm1	4	GO_BP	up
GO:1902033	regulation of hematopoietic stem cell proliferation	4/1210	19/28891	0.00716827	0.0465088	0.034107	Cxcl1/Cebpa/Tsc22d1/Pim1	4	GO_BP	up
GO:2000641	regulation of early endosome to late endosome transport	4/1210	19/28891	0.00716827	0.0465088	0.034107	Ezr/Snx3/Mapk3/Sh3glb1	4	GO_BP	up
GO:2000786	positive regulation of autophagosome assembly	4/1210	19/28891	0.00716827	0.0465088	0.034107	Becn1/Pip4k2c/Sh3glb1/Ralb	4	GO_BP	up
GO:0061008	hepaticobiliary system development	13/1210	143/28891	0.00719543	0.0466298	0.0341956	Fgf1/Upb1/Cebpb/Mdk/Notch1/Hes1/Cebpa/Lsr/Cited2/Sox9/Arf6/Zmpste24/Taf10	13	GO_BP	up
GO:1900046	regulation of hemostasis	8/1210	68/28891	0.00738295	0.0477885	0.0350454	Plat/Serpine2/Cd9/Ubash3b/Prkcd/Prdx2/Nfe2l2/Anxa5	8	GO_BP	up
GO:0060538	skeletal muscle organ development	18/1210	227/28891	0.00741101	0.0479134	0.035137	Cav2/Nupr1/Six1/Klf5/Heyl/Notch1/Gpcpd1/Cited2/Cdk5/Btg2/Ybx3/Akirin1/Psma6/Flot1/Nras/Tcf7l2/Hmg20b/Nfix	18	GO_BP	up
GO:0033674	positive regulation of kinase activity	29/1210	426/28891	0.00748328	0.0483236	0.0354378	Cd24a/Clu/Tcim/Cdkn1a/Hras/Rgcc/Fgf1/Dusp12/Nab2/Vldlr/Ccnd2/Lmo4/Cib1/Cdk5/Prkcd/Socs1/Map3k1/Ppp2r3c/Dstyk/Sdc4/Pim1/Gas6/Mif/Cdkn1b/Xrcc5/Abi1/Sh3glb1/Ralb/Hsp90ab1	29	GO_BP	up
GO:0001952	regulation of cell-matrix adhesion	12/1210	128/28891	0.00757911	0.0487382	0.0357418	Plet1/Fam107a/Jag1/Fmn1/Lrp1/Cib1/S100a10/Sdc4/Rac1/Actg1/Gfus/Jup	12	GO_BP	up
GO:0042593	glucose homeostasis	22/1210	298/28891	0.00759036	0.0487382	0.0357418	Pdk4/Grk2/Pim3/Lrp1/Dhps/Cebpa/Osbp/Ucp2/Rbm4/Sox4/Rac1/Hmgn3/Ccdc186/Kif5b/Adipor1/Gas6/Ptpmt1/Rraga/Tcf7l2/Selenot/Dynll1/Eny2	22	GO_BP	up
GO:0060485	mesenchyme development	23/1210	316/28891	0.00759264	0.0487382	0.0357418	Meox1/Zfp750/Rgcc/Hey1/Jag1/Sema3f/Six1/Heyl/Mdk/Notch1/Hes1/Cited2/Rflnb/Sox4/Sox9/Pdcd4/Mapk3/Ppp3r1/Adipor1/Taf10/Pax1/Hdac2/Tcf7l2	23	GO_BP	up
GO:0001778	plasma membrane repair	5/1210	30/28891	0.00760885	0.0487382	0.0357418	Rab3a/Chmp4c/Chmp1b/Chmp5/S100a10	5	GO_BP	up
GO:0034311	diol metabolic process	5/1210	30/28891	0.00760885	0.0487382	0.0357418	Sptssb/Ephx1/Qdpr/Pcbd2/Spr	5	GO_BP	up
GO:0090314	positive regulation of protein targeting to membrane	5/1210	30/28891	0.00760885	0.0487382	0.0357418	Fyn/Hras/Cib1/Cdk5/Fis1	5	GO_BP	up
GO:0046165	alcohol biosynthetic process	13/1210	144/28891	0.00761518	0.0487382	0.0357418	Ces1d/Ces1b/Sptssb/Hsd17b7/Fgf1/Got1/Ephx1/Sc5d/Nfkb1/Cyb5r3/Qdpr/Pcbd2/Spr	13	GO_BP	up
GO:0045664	regulation of neuron differentiation	19/1210	245/28891	0.00761868	0.0487382	0.0357418	Irx3/Cd24a/Duoxa1/Isl2/Hey1/Jag1/Six1/Heyl/Rara/Notch1/Hes1/Sox9/Tcf3/Rac1/Eif4e/Timp2/Bin1/Lsm1/Hmg20b	19	GO_BP	up
GO:0010737	protein kinase A signaling	6/1210	42/28891	0.00769371	0.0489893	0.035926	Tcim/Sfn/Rab13/Akap12/Ezr/Mif	6	GO_BP	up
GO:0018208	peptidyl-proline modification	6/1210	42/28891	0.00769371	0.0489893	0.035926	Ppic/Egln2/Fkbp4/Pin1/P4hb/Fkbp1a	6	GO_BP	up
GO:0060351	cartilage development involved in endochondral bone morphogenesis	6/1210	42/28891	0.00769371	0.0489893	0.035926	Stc1/Rarb/Nppc/Rara/Sox9/Zmpste24	6	GO_BP	up
GO:1900744	regulation of p38MAPK cascade	6/1210	42/28891	0.00769371	0.0489893	0.035926	Gsn/Gadd45b/Gadd45a/Rell1/Stk39/Ezr	6	GO_BP	up
GO:0045926	negative regulation of growth	20/1210	263/28891	0.00776024	0.0493555	0.0361945	Gdf15/Rgs4/Cdkn1a/Serpine2/Stc2/Adrb1/Sema3f/Cdkn2c/Sertad1/Cdkn2d/Cited2/Cdk5/Gsk3a/Ifrd1/Adipor1/Hdac2/Crlf3/Cdkn1b/Vgll4/Tcf7l2	20	GO_BP	up
GO:0032965	regulation of collagen biosynthetic process	7/1210	55/28891	0.00780091	0.0494992	0.0362999	Nppc/Rgcc/Got1/Cygb/Notch1/Prdx5/Suco	7	GO_BP	up
GO:1901799	negative regulation of proteasomal protein catabolic process	7/1210	55/28891	0.00780091	0.0494992	0.0362999	Aqp11/Alad/Gipc1/Bag5/Psme3ip1/Gabarapl2/Hsp90ab1	7	GO_BP	up
GO:0033500	carbohydrate homeostasis	22/1210	299/28891	0.00787968	0.0499411	0.036624	Pdk4/Grk2/Pim3/Lrp1/Dhps/Cebpa/Osbp/Ucp2/Rbm4/Sox4/Rac1/Hmgn3/Ccdc186/Kif5b/Adipor1/Gas6/Ptpmt1/Rraga/Tcf7l2/Selenot/Dynll1/Eny2	22	GO_BP	up
GO:0045685	regulation of glial cell differentiation	10/1210	98/28891	0.00799239	0.0505969	0.0371049	Il33/Serpine2/Nkx6-2/Prpf19/Mdk/Notch1/Hes1/Bin1/Hdac2/Tcf7l2	10	GO_BP	up
GO:0032102	negative regulation of response to external stimulus	32/1210	485/28891	0.00803044	0.0507791	0.0372385	Plat/Gpx2/Il33/Cd24a/Arg2/Serpine2/Selenos/Cd9/Nucb2/Sema3f/Ubash3b/Mdk/Trib1/Nlrp4e/Notch1/Zfp36/Cers2/Ufd1/Ier3/Prkcd/Psmb4/Cx3cl1/Ubqln1/Lyar/Nfkb1/Prdx2/Psma1/Mif/Anxa5/Lamp2/Csnk1a1/Trafd1	32	GO_BP	up
GO:0009064	glutamine family amino acid metabolic process	8/1210	69/28891	0.00805248	0.0508597	0.0372976	Arg2/Got1/Pycr2/Ucp2/Gclc/Glul/Gfpt1/Gclm	8	GO_BP	up
GO:0044706	multi-multicellular organism process	17/1210	212/28891	0.00816939	0.0515247	0.0377853	Serpine2/Hpgd/Mmp2/Cited2/Fkbp4/B4galt1/H3f3b/Ndrg3/Lamb1/Pithd1/Tmed2/Ctsl/Hexb/Junb/Mapk3/Comt/Ube2q1	17	GO_BP	up
GO:0000302	response to reactive oxygen species	16/1210	195/28891	0.008186	0.0515247	0.0377853	Fyn/Ripk1/Mmp2/Nqo1/Rhob/Ucp2/Prkcd/Net1/Prdx2/Aldh3a2/Nfe2l2/Stk25/Mapk3/Prdx5/Hdac2/Prdx1	16	GO_BP	up
GO:0001659	temperature homeostasis	16/1210	195/28891	0.008186	0.0515247	0.0377853	Gpx2/Ces1d/Edn2/Sfxn5/Cebpb/Adrb1/Arrdc3/Notch1/Ucp2/Elovl6/Hadh/Abhd6/Adipor1/Slc27a1/Nr1h2/Atf4	16	GO_BP	up
GO:0001824	blastocyst development	14/1210	162/28891	0.00835879	0.0524315	0.0384503	Hs3st6/Atp1b1/Rad51b/Elf3/Tbl1xr1/Cited2/Pelo/Mxi1/Sf3b6/Suds3/Junb/Psmc3/Psmc4/Smim14	14	GO_BP	up
GO:0010634	positive regulation of epithelial cell migration	14/1210	162/28891	0.00835879	0.0524315	0.0384503	Rab25/Plk2/Hspb1/Fgf1/Cib1/Rhob/Sox9/Rac1/Gfus/Bsg/Nfe2l2/Arf6/Col18a1/Rab11a	14	GO_BP	up
GO:0072006	nephron development	14/1210	162/28891	0.00835879	0.0524315	0.0384503	Irx3/Cd24a/Pgf/Aqp11/Fgf1/Hey1/Jag1/Six1/Heyl/Fmn1/Notch1/Hes1/Lzts2/Sox9	14	GO_BP	up
GO:0032272	negative regulation of protein polymerization	9/1210	84/28891	0.00849813	0.0532446	0.0390466	Capg/Sgk1/Gsn/Fkbp4/Vdac2/Prkcd/Twf1/Capzb/Mtpn	9	GO_BP	up
GO:0038202	TORC1 signaling	10/1210	99/28891	0.00856618	0.053331	0.03911	Akt1s1/Sec13/Pim1/Mapk3/Rbx1/Rraga/Ube2n/Lamtor3/Csnk1a1/Lamtor2	10	GO_BP	up
GO:0046888	negative regulation of hormone secretion	10/1210	99/28891	0.00856618	0.053331	0.03911	Kcnj6/Gnao1/Edn2/Pim3/Nucb2/Ucp2/Hadh/Ptpmt1/Anxa5/Eny2	10	GO_BP	up
GO:0007080	mitotic metaphase chromosome alignment	7/1210	56/28891	0.00860093	0.053331	0.03911	Becn1/Chmp4c/Chmp1b/Chmp5/Kat2b/Rrs1/Rab11a	7	GO_BP	up
GO:0019083	viral transcription	7/1210	56/28891	0.00860093	0.053331	0.03911	Notch1/Zfp36/Zfp639/Map3k1/Gtf2b/Trim8/Psmc3	7	GO_BP	up
GO:0038066	p38MAPK cascade	7/1210	56/28891	0.00860093	0.053331	0.03911	Gsn/Gadd45b/Zfp36/Gadd45a/Rell1/Stk39/Ezr	7	GO_BP	up
GO:0044088	regulation of vacuole organization	7/1210	56/28891	0.00860093	0.053331	0.03911	Nupr1/Becn1/Rnf5/Pip4k2c/Ift20/Sh3glb1/Ralb	7	GO_BP	up
GO:0006984	ER-nucleus signaling pathway	6/1210	43/28891	0.00863158	0.053331	0.03911	Selenos/Tmed2/Nfe2l2/Hspa5/Atf4/Eif2s1	6	GO_BP	up
GO:0072348	sulfur compound transport	6/1210	43/28891	0.00863158	0.053331	0.03911	Racgap1/Slc3a2/Slc25a11/Slc35b2/Slc27a1/Nfe2l1	6	GO_BP	up
GO:0006620	post-translational protein targeting to endoplasmic reticulum membrane	4/1210	20/28891	0.00866775	0.053331	0.03911	Ubl4a/Get4/Sec61b/Hspa5	4	GO_BP	up
GO:0034349	glial cell apoptotic process	4/1210	20/28891	0.00866775	0.053331	0.03911	Akap12/Cdk5/Prkcd/Gas6	4	GO_BP	up
GO:0036003	positive regulation of transcription from RNA polymerase II promoter in response to stress	4/1210	20/28891	0.00866775	0.053331	0.03911	Ces1d/Cebpb/Nfe2l2/Atf4	4	GO_BP	up
GO:0048207	vesicle targeting, rough ER to cis-Golgi	4/1210	20/28891	0.00866775	0.053331	0.03911	Trappc2/Trappc4/Trappc2l/Sar1b	4	GO_BP	up
GO:0048208	COPII vesicle coating	4/1210	20/28891	0.00866775	0.053331	0.03911	Trappc2/Trappc4/Trappc2l/Sar1b	4	GO_BP	up
GO:0071450	cellular response to oxygen radical	4/1210	20/28891	0.00866775	0.053331	0.03911	Nqo1/Prdx2/Nfe2l2/Prdx1	4	GO_BP	up
GO:0071451	cellular response to superoxide	4/1210	20/28891	0.00866775	0.053331	0.03911	Nqo1/Prdx2/Nfe2l2/Prdx1	4	GO_BP	up
GO:1905146	lysosomal protein catabolic process	4/1210	20/28891	0.00866775	0.053331	0.03911	Atp13a2/Lrp1/Tmem199/Lamp2	4	GO_BP	up
GO:0002026	regulation of the force of heart contraction	5/1210	31/28891	0.00876534	0.0534582	0.0392032	Grk2/Adrb1/Atp1a1/Glrx3/Pebp1	5	GO_BP	up
GO:0002834	regulation of response to tumor cell	5/1210	31/28891	0.00876534	0.0534582	0.0392032	Cd24a/Nectin2/Cd274/Dapk1/Hspd1	5	GO_BP	up
GO:2000737	negative regulation of stem cell differentiation	5/1210	31/28891	0.00876534	0.0534582	0.0392032	Jag1/Notch1/Hes1/Zfp36/Nfe2l2	5	GO_BP	up
GO:0032008	positive regulation of TOR signaling	8/1210	70/28891	0.00876652	0.0534582	0.0392032	Sec13/Pim1/Rbx1/Gas6/Rraga/Lamtor3/Csnk1a1/Lamtor2	8	GO_BP	up
GO:0032206	positive regulation of telomere maintenance	8/1210	70/28891	0.00876652	0.0534582	0.0392032	Cct7/Mapk3/Cct2/Tcp1/Xrcc5/Ruvbl1/Cct6a/Cct8	8	GO_BP	up
GO:0045600	positive regulation of fat cell differentiation	8/1210	70/28891	0.00876652	0.0534582	0.0392032	Cebpb/Six1/Klf5/Noct/Cebpa/Zfp36/Cds1/Pim1	8	GO_BP	up
GO:0060350	endochondral bone morphogenesis	8/1210	70/28891	0.00876652	0.0534582	0.0392032	Stc1/Rarb/Nppc/Nab2/Rara/Sox9/Zmpste24/Nfix	8	GO_BP	up
GO:0097006	regulation of plasma lipoprotein particle levels	8/1210	70/28891	0.00876652	0.0534582	0.0392032	Ces1d/Pla2g7/Vldlr/Mylip/Cnpy2/Nr1h2/Pltp/Arf1	8	GO_BP	up
GO:0043112	receptor metabolic process	9/1210	85/28891	0.00916113	0.0555538	0.04074	Ece1/Plekhj1/Cdk5/Becn1/Chmp5/Ctsd/Mylip/Sh3glb1/Fnta	9	GO_BP	up
GO:2000379	positive regulation of reactive oxygen species metabolic process	9/1210	85/28891	0.00916113	0.0555538	0.04074	Cxcl1/Duoxa1/Cdkn1a/Gadd45a/Prkcd/Cbr1/Nfe2l2/Dcxr/Grb2	9	GO_BP	up
GO:0006368	transcription elongation by RNA polymerase II	10/1210	100/28891	0.00917104	0.0555538	0.04074	Tcea3/Med31/Paf1/Adrm1/Med30/Med7/Leo1/Med28/Med19/Polr2i	10	GO_BP	up
GO:0007040	lysosome organization	10/1210	100/28891	0.00917104	0.0555538	0.04074	Tmem199/Becn1/Chmp4c/Chmp1b/Chmp5/Rab20/Snapin/Hexb/Arf1/Atp6v0c	10	GO_BP	up
GO:0032091	negative regulation of protein binding	10/1210	100/28891	0.00917104	0.0555538	0.04074	Cdkn1a/Plk2/Tmbim6/Ppp1r2/Psme3ip1/Pin1/Stub1/Mapk3/Bax/Ralb	10	GO_BP	up
GO:0080171	lytic vacuole organization	10/1210	100/28891	0.00917104	0.0555538	0.04074	Tmem199/Becn1/Chmp4c/Chmp1b/Chmp5/Rab20/Snapin/Hexb/Arf1/Atp6v0c	10	GO_BP	up
GO:0001837	epithelial to mesenchymal transition	14/1210	164/28891	0.00926491	0.055963	0.0410401	Zfp750/Rgcc/Hey1/Jag1/Heyl/Mdk/Notch1/Rflnb/Sox9/Pdcd4/Ppp3r1/Adipor1/Hdac2/Tcf7l2	14	GO_BP	up
GO:0003266	regulation of secondary heart field cardioblast proliferation	3/1210	11/28891	0.00939189	0.055963	0.0410401	Six1/Notch1/Hes1	3	GO_BP	up
GO:0006534	cysteine metabolic process	3/1210	11/28891	0.00939189	0.055963	0.0410401	Cdo1/Gclc/Gclm	3	GO_BP	up
GO:0015808	L-alanine transport	3/1210	11/28891	0.00939189	0.055963	0.0410401	Slc1a4/Slc3a2/Sfxn1	3	GO_BP	up
GO:0016574	histone ubiquitination	3/1210	11/28891	0.00939189	0.055963	0.0410401	Rnf2/Ube2b/Ube2n	3	GO_BP	up
GO:0035090	maintenance of apical/basal cell polarity	3/1210	11/28891	0.00939189	0.055963	0.0410401	Nherf1/Pdzd11/Lin7c	3	GO_BP	up
GO:0044341	sodium-dependent phosphate transport	3/1210	11/28891	0.00939189	0.055963	0.0410401	Stc2/Cebpb/Atf4	3	GO_BP	up
GO:0046761	viral budding from plasma membrane	3/1210	11/28891	0.00939189	0.055963	0.0410401	Chmp4c/Chmp1b/Chmp5	3	GO_BP	up
GO:0051469	vesicle fusion with vacuole	3/1210	11/28891	0.00939189	0.055963	0.0410401	Chmp4c/Chmp1b/Chmp5	3	GO_BP	up
GO:0060056	mammary gland involution	3/1210	11/28891	0.00939189	0.055963	0.0410401	Elf3/Nfkb1/Bax	3	GO_BP	up
GO:0060623	regulation of chromosome condensation	3/1210	11/28891	0.00939189	0.055963	0.0410401	H3f3b/Smc4/H3f3a	3	GO_BP	up
GO:0060837	blood vessel endothelial cell differentiation	3/1210	11/28891	0.00939189	0.055963	0.0410401	Hey1/Ccm2/Notch1	3	GO_BP	up
GO:0061763	multivesicular body-lysosome fusion	3/1210	11/28891	0.00939189	0.055963	0.0410401	Chmp4c/Chmp1b/Chmp5	3	GO_BP	up
GO:1903332	regulation of protein folding	3/1210	11/28891	0.00939189	0.055963	0.0410401	Bag5/Pdia4/Pdcl3	3	GO_BP	up
GO:2000171	negative regulation of dendrite development	3/1210	11/28891	0.00939189	0.055963	0.0410401	Cyth2/Gsk3a/Arf6	3	GO_BP	up
GO:0010596	negative regulation of endothelial cell migration	7/1210	57/28891	0.00945956	0.0562438	0.041246	Stc1/Dcn/Rgcc/Notch1/Gadd45a/Csnk2b/Jup	7	GO_BP	up
GO:0032350	regulation of hormone metabolic process	7/1210	57/28891	0.00945956	0.0562438	0.041246	Duoxa1/Stc2/Atp1a1/Nfkb1/Stub1/Zmpste24/Tcf7l2	7	GO_BP	up
GO:0008347	glial cell migration	8/1210	71/28891	0.00952681	0.0563378	0.041315	Cd9/Lrp1/Cers2/Cdk5/Lamb1/Cx3cl1/Idh2/Hexb	8	GO_BP	up
GO:0010659	cardiac muscle cell apoptotic process	8/1210	71/28891	0.00952681	0.0563378	0.041315	Fbxo32/Nupr1/Dynlt1f/Acot1/Mdk/Dynlt1c/Nfe2l2/Pcmt1	8	GO_BP	up
GO:0019933	cAMP-mediated signaling	8/1210	71/28891	0.00952681	0.0563378	0.041315	Ece1/Nucb2/Cap1/Sox9/Gapdh/Cdc34/Ube2b/Pebp1	8	GO_BP	up
GO:0042509	regulation of tyrosine phosphorylation of STAT protein	8/1210	71/28891	0.00952681	0.0563378	0.041315	Tnfrsf18/Fyn/Hes1/Osbp/Irf1/Socs1/Ctf1/Hdac2	8	GO_BP	up
GO:0050818	regulation of coagulation	8/1210	71/28891	0.00952681	0.0563378	0.041315	Plat/Serpine2/Cd9/Ubash3b/Prkcd/Prdx2/Nfe2l2/Anxa5	8	GO_BP	up
GO:0006890	retrograde vesicle-mediated transport, Golgi to endoplasmic reticulum	6/1210	44/28891	0.00964856	0.0568124	0.041663	Copz2/Kdelr2/Rab6a/Rer1/Cope/Pitpnb	6	GO_BP	up
GO:0010874	regulation of cholesterol efflux	6/1210	44/28891	0.00964856	0.0568124	0.041663	Ces1d/Ces1b/Lrp1/Nfkbia/Nr1h2/Pltp	6	GO_BP	up
GO:0046621	negative regulation of organ growth	6/1210	44/28891	0.00964856	0.0568124	0.041663	Rgs4/Cited2/Gsk3a/Hdac2/Vgll4/Tcf7l2	6	GO_BP	up
GO:0046627	negative regulation of insulin receptor signaling pathway	6/1210	44/28891	0.00964856	0.0568124	0.041663	Ptpre/Nucb2/Prkcd/Socs1/Gsk3a/Pip4k2c	6	GO_BP	up
GO:0090287	regulation of cellular response to growth factor stimulus	23/1210	323/28891	0.00973589	0.057265	0.0419949	Cav2/Grem2/Dcn/Fgf1/Shisa2/Got1/Lrp1/Notch1/Gipc1/Hes1/Cited2/Pelo/Ing1/Sinhcaf/Dstyk/Suds3/Prmt1/Pin1/Stub1/Hspa5/Hdac2/Tcf7l2/Sh3glb1	23	GO_BP	up
GO:0019915	lipid storage	10/1210	101/28891	0.00980803	0.0575154	0.0421785	Ces1d/Ces1b/Smim22/Pnpla2/Nfkbia/Sqle/Abhd5/Cds1/Hexb/Nr1h2	10	GO_BP	up
GO:0035914	skeletal muscle cell differentiation	10/1210	101/28891	0.00980803	0.0575154	0.0421785	Nupr1/Six1/Klf5/Heyl/Notch1/Cited2/Btg2/Akirin1/Hmg20b/Nfix	10	GO_BP	up
GO:0060070	canonical Wnt signaling pathway	22/1210	305/28891	0.00980997	0.0575154	0.0421785	Nrarp/Nherf1/Tbl1xr1/Mdk/Notch1/Map3k1/Shisa6/Gsk3a/Lzts2/Sox4/Sox9/Zbed3/Nfkb1/Pin1/Ube2b/Csnk1e/Hdac2/Ift20/Tcf7l2/Ruvbl1/Jup/Csnk1a1	22	GO_BP	up
GO:0034109	homotypic cell-cell adhesion	9/1210	86/28891	0.0098625	0.0576383	0.0422687	Cd24a/Serpine2/Cd9/Ubash3b/Bloc1s4/Prkcd/Pdia4/Dsc2/Jup	9	GO_BP	up
GO:0035304	regulation of protein dephosphorylation	9/1210	86/28891	0.0098625	0.0576383	0.0422687	Ppp1r16b/Ppp1r2/Prkcd/Tiprl/Hsp90b1/Pin1/Calm3/Calm1/Arpp19	9	GO_BP	up
GO:0072078	nephron tubule morphogenesis	9/1210	86/28891	0.0098625	0.0576383	0.0422687	Irx3/Pgf/Fgf1/Hey1/Six1/Fmn1/Hes1/Lzts2/Sox9	9	GO_BP	up
GO:0001933	negative regulation of protein phosphorylation	24/1210	342/28891	0.00995458	0.0581143	0.0426178	Ocln/Cdkn1a/Grk2/Hspb1/Cdkn2c/Ubash3b/Trib1/Gadd45b/Cib1/Gadd45a/Irf1/Akt1s1/Ppp5c/Prkcd/Socs1/Tsg101/Dnajc3/Tmed2/Zbed3/Kat2b/Prkar1a/Bax/Cdkn1b/Pebp1	24	GO_BP	up
GO:0045598	regulation of fat cell differentiation	13/1210	149/28891	0.010012	0.0582273	0.0427006	Nucb2/Jag1/Cebpb/Six1/Klf5/Noct/Trib2/Hes1/Cebpa/Zfp36/Cds1/Pim1/Tcf7l2	13	GO_BP	up
GO:0055022	negative regulation of cardiac muscle tissue growth	5/1210	32/28891	0.0100377	0.0582273	0.0427006	Rgs4/Cited2/Gsk3a/Hdac2/Vgll4	5	GO_BP	up
GO:0060317	cardiac epithelial to mesenchymal transition	5/1210	32/28891	0.0100377	0.0582273	0.0427006	Hey1/Jag1/Heyl/Notch1/Pdcd4	5	GO_BP	up
GO:0061117	negative regulation of heart growth	5/1210	32/28891	0.0100377	0.0582273	0.0427006	Rgs4/Cited2/Gsk3a/Hdac2/Vgll4	5	GO_BP	up
GO:0070198	protein localization to chromosome, telomeric region	5/1210	32/28891	0.0100377	0.0582273	0.0427006	Cct7/Cct2/Tcp1/Cct6a/Cct8	5	GO_BP	up
GO:1903649	regulation of cytoplasmic transport	5/1210	32/28891	0.0100377	0.0582273	0.0427006	Ezr/Snx3/Mapk3/Sh3glb1/Rab11a	5	GO_BP	up
GO:0015711	organic anion transport	29/1210	436/28891	0.0101165	0.0586209	0.0429893	Ces1d/Crabp2/Rgs4/Ces1b/Arg2/Mfsd10/Nherf1/Sfxn5/Slc25a21/Pla2g12a/Gipc1/Slc35b1/Slc1a4/Ucp2/Prkcd/Slc25a17/Stard10/Slc3a2/Slc25a11/Slc35b2/Arl6ip5/Sfxn1/Crot/Slc27a1/Mif/Mpc1/Slc25a5/Nfe2l1/Fis1	29	GO_BP	up
GO:0016072	rRNA metabolic process	19/1210	252/28891	0.010127	0.0586209	0.0429893	Isg20/Pop7/Brix1/Tsr3/Pelo/Mrto4/Kat2b/Trir/Lyar/Rrs1/Utp11/Rrp1/Top1/Gtpbp4/Pa2g4/Fcf1/Imp3/Ebna1bp2/Gtf2h5	19	GO_BP	up
GO:0015748	organophosphate ester transport	12/1210	133/28891	0.0101505	0.0586329	0.042998	Tmem30b/Atp8a2/Osbp/Prkcd/Slc25a17/Slc35b2/Prelid3b/Slc25a5/Pltp/Vapa/Pitpnb/Tmem30a	12	GO_BP	up
GO:0099072	regulation of postsynaptic membrane neurotransmitter receptor levels	12/1210	133/28891	0.0101505	0.0586329	0.042998	Gpc6/Rapgef4/Hras/Pick1/Shisa6/Sh3glb2/Ppp3r1/Snap47/Rala/Snx27/Rab11a/Ap2s1	12	GO_BP	up
GO:2000045	regulation of G1/S transition of mitotic cell cycle	14/1210	166/28891	0.0102466	0.05902	0.043282	Cdkn1a/Rgcc/Fam107a/Ccnd2/Cdkn2c/Cdkn2d/Cdk2ap2/Psme2/Tcf3/Smarcd2/Rps27l/Crlf3/Cdkn1b/Anp32b	14	GO_BP	up
GO:1902074	response to salt	24/1210	343/28891	0.010293	0.05902	0.043282	Rgs10/Sorbs2/Fyn/Six1/Tmbim6/Cebpa/Tuba1a/Gdi1/Ppp5c/Cdk5/Gsk3a/Stk39/Kcnh1/Krt8/Clic4/Hsp90b1/Junb/Cpne8/Gna11/Calm3/Cdkn1b/Anxa5/Calm1/Ly6e	24	GO_BP	up
GO:0031929	TOR signaling	15/1210	183/28891	0.0103313	0.05902	0.043282	Akt1s1/Gsk3a/Sec13/Fbxo9/Tiprl/Pim1/Mapk3/Rbx1/Gas6/Zmpste24/Rraga/Ube2n/Lamtor3/Csnk1a1/Lamtor2	15	GO_BP	up
GO:1903051	negative regulation of proteolysis involved in protein catabolic process	8/1210	72/28891	0.0103351	0.05902	0.043282	Aqp11/Alad/Gipc1/Bag5/Psme3ip1/Pdcl3/Gabarapl2/Hsp90ab1	8	GO_BP	up
GO:0002836	positive regulation of response to tumor cell	4/1210	21/28891	0.0103582	0.05902	0.043282	Cd24a/Nectin2/Cd274/Hspd1	4	GO_BP	up
GO:0002839	positive regulation of immune response to tumor cell	4/1210	21/28891	0.0103582	0.05902	0.043282	Cd24a/Nectin2/Cd274/Hspd1	4	GO_BP	up
GO:0010766	negative regulation of sodium ion transport	4/1210	21/28891	0.0103582	0.05902	0.043282	Serpine2/Nherf1/Nedd4l/Stk39	4	GO_BP	up
GO:0032495	response to muramyl dipeptide	4/1210	21/28891	0.0103582	0.05902	0.043282	Jag1/Notch1/Nfkbia/Chmp5	4	GO_BP	up
GO:0045292	mRNA cis splicing, via spliceosome	4/1210	21/28891	0.0103582	0.05902	0.043282	Clns1a/Wbp4/Cwc15/Snrpc	4	GO_BP	up
GO:0060416	response to growth hormone	4/1210	21/28891	0.0103582	0.05902	0.043282	Gdf15/Irf1/Adrm1/Leprotl1	4	GO_BP	up
GO:1903427	negative regulation of reactive oxygen species biosynthetic process	4/1210	21/28891	0.0103582	0.05902	0.043282	Fyn/Ndufc2/Hbp1/Hspd1	4	GO_BP	up
GO:1990182	exosomal secretion	4/1210	21/28891	0.0103582	0.05902	0.043282	Atp13a2/Tsg101/Sdc4/Rab11a	4	GO_BP	up
GO:0042743	hydrogen peroxide metabolic process	7/1210	58/28891	0.0103792	0.05902	0.043282	Duoxa1/Fyn/Txnrd1/Cycs/Prdx2/Prdx5/Prdx1	7	GO_BP	up
GO:0045604	regulation of epidermal cell differentiation	7/1210	58/28891	0.0103792	0.05902	0.043282	Sfn/Grhl1/Hey1/Notch1/Hes1/Zfp36/Mafg	7	GO_BP	up
GO:0051489	regulation of filopodium assembly	7/1210	58/28891	0.0103792	0.05902	0.043282	Rab3ip/Prkcd/Rac1/Arf6/Rala/Mien1/Capzb	7	GO_BP	up
GO:0046942	carboxylic acid transport	25/1210	362/28891	0.0104585	0.0594096	0.0435677	Ces1d/Crabp2/Rgs4/Ces1b/Arg2/Nherf1/Sfxn5/Slc25a21/Pla2g12a/Gipc1/Slc1a4/Ucp2/Prkcd/Slc25a17/Stard10/Slc3a2/Slc25a11/Arl6ip5/Sfxn1/Crot/Slc27a1/Mif/Mpc1/Nfe2l1/Fis1	25	GO_BP	up
GO:0002065	columnar/cuboidal epithelial cell differentiation	13/1210	150/28891	0.0105551	0.0598962	0.0439245	Rarb/Nkx6-2/Jag1/Cebpb/Klf5/Rara/Notch1/Hes1/Rbm4/Tubb5/Sox4/Sox9/Nfe2l1	13	GO_BP	up
GO:0000245	spliceosomal complex assembly	6/1210	45/28891	0.010748	0.0606141	0.0444509	Celf4/Prpf19/Srsf10/Puf60/Snrpc/Ddx39b	6	GO_BP	up
GO:0009394	2'-deoxyribonucleotide metabolic process	6/1210	45/28891	0.010748	0.0606141	0.0444509	Urah/Upb1/Dut/Nudt18/Ak2/Cmpk1	6	GO_BP	up
GO:0019692	deoxyribose phosphate metabolic process	6/1210	45/28891	0.010748	0.0606141	0.0444509	Urah/Upb1/Dut/Nudt18/Ak2/Cmpk1	6	GO_BP	up
GO:0042771	intrinsic apoptotic signaling pathway in response to DNA damage by p53 class mediator	6/1210	45/28891	0.010748	0.0606141	0.0444509	Cdkn1a/Nupr1/Aen/Tmem109/Mif/Rps27l	6	GO_BP	up
GO:0048147	negative regulation of fibroblast proliferation	6/1210	45/28891	0.010748	0.0606141	0.0444509	Nupr1/Med31/Socs1/Lzts2/Trp53inp1/Bax	6	GO_BP	up
GO:2001239	regulation of extrinsic apoptotic signaling pathway in absence of ligand	6/1210	45/28891	0.010748	0.0606141	0.0444509	Fyn/Ripk1/Cx3cl1/Il7/Prdx2/Mcl1	6	GO_BP	up
GO:0006937	regulation of muscle contraction	14/1210	167/28891	0.0107671	0.060659	0.0444839	Stc1/Arg2/Atp1b1/Edn2/Grk2/Tmem38a/Adrb1/Atp1a1/Dsc2/Bin1/Calm3/Cttn/Calm1/Jup	14	GO_BP	up
GO:0055088	lipid homeostasis	15/1210	184/28891	0.010827	0.0609338	0.0446854	Ces1d/Ces1b/Cd24a/Atp13a2/Adrb1/Got1/Cebpa/Pnpla2/Abhd5/Slc25a46/Usf2/Mylip/Nr1h2/Sar1b/Nfe2l1	15	GO_BP	up
GO:0000209	protein polyubiquitination	19/1210	254/28891	0.0109535	0.0615196	0.045115	Nedd4l/Prpf19/Nqo1/Map3k1/Rnf5/Rnf126/Irf2bp1/Dda1/Skp1/Stub1/Rbx1/Cdc34/Ube2b/Nfe2l1/Ube2n/Ube2v1/Ube2l3/Ube2q1/Ube2d3	19	GO_BP	up
GO:0048762	mesenchymal cell differentiation	19/1210	254/28891	0.0109535	0.0615196	0.045115	Zfp750/Rgcc/Hey1/Jag1/Sema3f/Six1/Heyl/Mdk/Notch1/Hes1/Cited2/Rflnb/Sox9/Pdcd4/Mapk3/Ppp3r1/Adipor1/Hdac2/Tcf7l2	19	GO_BP	up
GO:0006650	glycerophospholipid metabolic process	20/1210	272/28891	0.0109994	0.0617137	0.0452573	Pla2g7/Pigf/Plcd4/Serinc5/Chpt1/Gpcpd1/Socs1/Becn1/Abhd12/Pip4k2c/Abhd5/Bpnt1/Cds1/Abhd6/Impa1/Slc27a1/Ptpmt1/Nr1h2/Sh3glb1/Hadha	20	GO_BP	up
GO:0051224	negative regulation of protein transport	13/1210	151/28891	0.0111209	0.0622677	0.0456636	Kcnj6/Gnao1/Pim3/Ucp2/Gdi1/Cdk5/Hadh/Frmd4a/Idh2/Snx3/Ptpmt1/Anxa5/Eny2	13	GO_BP	up
GO:0051928	positive regulation of calcium ion transport	13/1210	151/28891	0.0111209	0.0622677	0.0456636	Stc1/Atp1b1/Stac/Cxcl10/Adrb1/Cdk5/S100a1/Stim2/Cx3cl1/Ppp3r1/Bax/Calm3/Calm1	13	GO_BP	up
GO:0015849	organic acid transport	25/1210	364/28891	0.0111519	0.0623775	0.0457441	Ces1d/Crabp2/Rgs4/Ces1b/Arg2/Nherf1/Sfxn5/Slc25a21/Pla2g12a/Gipc1/Slc1a4/Ucp2/Prkcd/Slc25a17/Stard10/Slc3a2/Slc25a11/Arl6ip5/Sfxn1/Crot/Slc27a1/Mif/Mpc1/Nfe2l1/Fis1	25	GO_BP	up
GO:0070936	protein K48-linked ubiquitination	8/1210	73/28891	0.0111931	0.0625441	0.0458663	Nedd4l/Rnf5/Rnf126/Skp1/Rbx1/Cdc34/Ube2b/Ube2d3	8	GO_BP	up
GO:1902075	cellular response to salt	16/1210	202/28891	0.0112551	0.0628264	0.0460733	Rgs10/Sorbs2/Fyn/Six1/Cebpa/Tuba1a/Gsk3a/Stk39/Kcnh1/Clic4/Hsp90b1/Junb/Cpne8/Gna11/Cdkn1b/Ly6e	16	GO_BP	up
GO:0007098	centrosome cycle	12/1210	135/28891	0.01135	0.062975	0.0461823	Plk2/Ssx2ip/Gadd45a/Tuba1a/Nin/Chmp4c/Chmp1b/Chmp5/Dync1li1/Kat2b/Ranbp1/Nsfl1c	12	GO_BP	up
GO:0048713	regulation of oligodendrocyte differentiation	7/1210	59/28891	0.0113621	0.062975	0.0461823	Il33/Nkx6-2/Mdk/Notch1/Hes1/Hdac2/Tcf7l2	7	GO_BP	up
GO:1901607	alpha-amino acid biosynthetic process	7/1210	59/28891	0.0113621	0.062975	0.0461823	Got1/Psph/Pycr2/Sephs2/Aasdhppt/Psat1/Glul	7	GO_BP	up
GO:1904356	regulation of telomere maintenance via telomere lengthening	7/1210	59/28891	0.0113621	0.062975	0.0461823	Cct7/Mapk3/Cct2/Tcp1/Xrcc5/Cct6a/Cct8	7	GO_BP	up
GO:0006637	acyl-CoA metabolic process	9/1210	88/28891	0.0113856	0.062975	0.0461823	Ces1d/Pdk4/Acot1/Vdac1/Ppcs/Pdhb/Mpc1/Mcee/Suclg1	9	GO_BP	up
GO:0032456	endocytic recycling	9/1210	88/28891	0.0113856	0.062975	0.0461823	Rab13/Arl4c/Vps26c/Snx3/Arf6/Stx6/Snx27/Rab11a/Vps29	9	GO_BP	up
GO:0035383	thioester metabolic process	9/1210	88/28891	0.0113856	0.062975	0.0461823	Ces1d/Pdk4/Acot1/Vdac1/Ppcs/Pdhb/Mpc1/Mcee/Suclg1	9	GO_BP	up
GO:0072088	nephron epithelium morphogenesis	9/1210	88/28891	0.0113856	0.062975	0.0461823	Irx3/Pgf/Fgf1/Hey1/Six1/Fmn1/Hes1/Lzts2/Sox9	9	GO_BP	up
GO:1902117	positive regulation of organelle assembly	9/1210	88/28891	0.0113856	0.062975	0.0461823	Becn1/Pip4k2c/Sdc4/Cnot6/Ift20/Sh3glb1/Dynll1/Ralb/Septin7	9	GO_BP	up
GO:0044272	sulfur compound biosynthetic process	11/1210	119/28891	0.0113967	0.062975	0.0461823	Hs3st6/Pdk4/Ugdh/Vdac1/Slc35b2/Ppcs/Papss1/Pdhb/Mpc1/Tcf7l2/Mat2b	11	GO_BP	up
GO:0006901	vesicle coating	5/1210	33/28891	0.0114311	0.0630382	0.0462287	Trappc6b/Trappc2/Trappc4/Trappc2l/Sar1b	5	GO_BP	up
GO:0071763	nuclear membrane organization	5/1210	33/28891	0.0114311	0.0630382	0.0462287	Chmp4c/Chmp1b/Chmp5/Ubxn2a/Nsfl1c	5	GO_BP	up
GO:0030178	negative regulation of Wnt signaling pathway	14/1210	169/28891	0.0118699	0.0646142	0.0473844	Nherf1/Shisa2/Lrp1/Mdk/Notch1/Shisa6/Gsk3a/Lzts2/Sox9/Csnk1e/Hdac2/Vgll4/Tcf7l2/Csnk1a1	14	GO_BP	up
GO:0001938	positive regulation of endothelial cell proliferation	10/1210	104/28891	0.0119222	0.0646142	0.0473844	Cav2/Pgf/F3/Nrarp/Ppp1r16b/Hmgb2/Mdk/Pdcl3/Nras/Col18a1	10	GO_BP	up
GO:0032092	positive regulation of protein binding	10/1210	104/28891	0.0119222	0.0646142	0.0473844	Plk2/Lrp1/Cdk5/Derl1/Tmed2/Pin1/Flot1/Tcf7l2/Ralb/Hsp90ab1	10	GO_BP	up
GO:0014044	Schwann cell development	6/1210	46/28891	0.0119333	0.0646142	0.0473844	Hras/Cdk5/Slc25a46/Mapk3/Ppp3r1/Grb2	6	GO_BP	up
GO:0030195	negative regulation of blood coagulation	6/1210	46/28891	0.0119333	0.0646142	0.0473844	Plat/Serpine2/Cd9/Ubash3b/Prkcd/Anxa5	6	GO_BP	up
GO:0032373	positive regulation of sterol transport	6/1210	46/28891	0.0119333	0.0646142	0.0473844	Ces1d/Ces1b/Lrp1/Nfkbia/Nr1h2/Pltp	6	GO_BP	up
GO:0032376	positive regulation of cholesterol transport	6/1210	46/28891	0.0119333	0.0646142	0.0473844	Ces1d/Ces1b/Lrp1/Nfkbia/Nr1h2/Pltp	6	GO_BP	up
GO:0071825	protein-lipid complex organization	6/1210	46/28891	0.0119333	0.0646142	0.0473844	Ces1d/Pla2g7/Bin1/Nr1h2/Pltp/Arf1	6	GO_BP	up
GO:0010658	striated muscle cell apoptotic process	8/1210	74/28891	0.0121024	0.0646142	0.0473844	Fbxo32/Nupr1/Dynlt1f/Acot1/Mdk/Dynlt1c/Nfe2l2/Pcmt1	8	GO_BP	up
GO:0010761	fibroblast migration	8/1210	74/28891	0.0121024	0.0646142	0.0473844	Nherf1/Cygb/Akap12/Sdc4/Rac1/Pdlim1/Zfand5/Lamtor2	8	GO_BP	up
GO:0043462	regulation of ATP-dependent activity	8/1210	74/28891	0.0121024	0.0646142	0.0473844	Atp1b1/Napa/Dnajb1/Pam16/1810037I17Rik/Atp1b3/Cnn3/Tor1aip2	8	GO_BP	up
GO:0060675	ureteric bud morphogenesis	8/1210	74/28891	0.0121024	0.0646142	0.0473844	Pgf/Fgf1/Hey1/Six1/Fmn1/Hes1/Lzts2/Sox9	8	GO_BP	up
GO:0006047	UDP-N-acetylglucosamine metabolic process	3/1210	12/28891	0.012137	0.0646142	0.0473844	Uap1/Gfpt1/Gnpda2	3	GO_BP	up
GO:0006686	sphingomyelin biosynthetic process	3/1210	12/28891	0.012137	0.0646142	0.0473844	Sgms2/Osbp/Vapa	3	GO_BP	up
GO:0010764	negative regulation of fibroblast migration	3/1210	12/28891	0.012137	0.0646142	0.0473844	Nherf1/Cygb/Rac1	3	GO_BP	up
GO:0014816	skeletal muscle satellite cell differentiation	3/1210	12/28891	0.012137	0.0646142	0.0473844	Klf5/Akirin1/Nfix	3	GO_BP	up
GO:0014874	response to stimulus involved in regulation of muscle adaptation	3/1210	12/28891	0.012137	0.0646142	0.0473844	Trim63/Fbxo32/Ndufs4	3	GO_BP	up
GO:0033762	response to glucagon	3/1210	12/28891	0.012137	0.0646142	0.0473844	Cdo1/Prkar1a/Cyc1	3	GO_BP	up
GO:0042559	pteridine-containing compound biosynthetic process	3/1210	12/28891	0.012137	0.0646142	0.0473844	Qdpr/Pcbd2/Spr	3	GO_BP	up
GO:0043653	mitochondrial fragmentation involved in apoptotic process	3/1210	12/28891	0.012137	0.0646142	0.0473844	Bax/Atg3/Fis1	3	GO_BP	up
GO:0045607	regulation of inner ear auditory receptor cell differentiation	3/1210	12/28891	0.012137	0.0646142	0.0473844	Hey1/Notch1/Hes1	3	GO_BP	up
GO:0045631	regulation of mechanoreceptor differentiation	3/1210	12/28891	0.012137	0.0646142	0.0473844	Hey1/Notch1/Hes1	3	GO_BP	up
GO:0046015	regulation of transcription by glucose	3/1210	12/28891	0.012137	0.0646142	0.0473844	Kat2b/Usf2/Mlx	3	GO_BP	up
GO:0046166	glyceraldehyde-3-phosphate biosynthetic process	3/1210	12/28891	0.012137	0.0646142	0.0473844	Tkt/Mdh2/Gapdh	3	GO_BP	up
GO:0046753	non-lytic viral release	3/1210	12/28891	0.012137	0.0646142	0.0473844	Chmp4c/Chmp1b/Chmp5	3	GO_BP	up
GO:0060767	epithelial cell proliferation involved in prostate gland development	3/1210	12/28891	0.012137	0.0646142	0.0473844	Notch1/Sox9/Cdkn1b	3	GO_BP	up
GO:0061684	chaperone-mediated autophagy	3/1210	12/28891	0.012137	0.0646142	0.0473844	Clu/Stub1/Lamp2	3	GO_BP	up
GO:0071712	ER-associated misfolded protein catabolic process	3/1210	12/28891	0.012137	0.0646142	0.0473844	Ufd1/Derl1/Rnf5	3	GO_BP	up
GO:0097576	vacuole fusion	3/1210	12/28891	0.012137	0.0646142	0.0473844	Chmp4c/Chmp1b/Chmp5	3	GO_BP	up
GO:0098911	regulation of ventricular cardiac muscle cell action potential	3/1210	12/28891	0.012137	0.0646142	0.0473844	Dsc2/Bin1/Jup	3	GO_BP	up
GO:0106015	negative regulation of inflammatory response to wounding	3/1210	12/28891	0.012137	0.0646142	0.0473844	Il33/Cd24a/Mdk	3	GO_BP	up
GO:1901029	negative regulation of mitochondrial outer membrane permeabilization involved in apoptotic signaling pathway	3/1210	12/28891	0.012137	0.0646142	0.0473844	Ier3/Gclc/Slc25a5	3	GO_BP	up
GO:1905907	negative regulation of amyloid fibril formation	3/1210	12/28891	0.012137	0.0646142	0.0473844	Clu/Pfdn4/Pfdn2	3	GO_BP	up
GO:2000009	negative regulation of protein localization to cell surface	3/1210	12/28891	0.012137	0.0646142	0.0473844	Plk2/Nedd4l/Arf6	3	GO_BP	up
GO:2000980	regulation of inner ear receptor cell differentiation	3/1210	12/28891	0.012137	0.0646142	0.0473844	Hey1/Notch1/Hes1	3	GO_BP	up
GO:0034728	nucleosome organization	9/1210	89/28891	0.0122101	0.0646142	0.0473844	H3c15/H1f2/H2ac25/Nap1l4/Sox9/Cebpg/Smarcd2/Set/Anp32b	9	GO_BP	up
GO:0042147	retrograde transport, endosome to Golgi	9/1210	89/28891	0.0122101	0.0646142	0.0473844	Plekhj1/Tbc1d10a/Rab6a/Rnf126/Snx3/Tmem87a/Snx5/Stx6/Vps29	9	GO_BP	up
GO:0060113	inner ear receptor cell differentiation	9/1210	89/28891	0.0122101	0.0646142	0.0473844	Pls1/Nherf1/Hey1/Jag1/Notch1/Hes1/Sdc4/Rac1/Ift20	9	GO_BP	up
GO:0007163	establishment or maintenance of cell polarity	18/1210	239/28891	0.0122157	0.0646142	0.0473844	Rhov/Nherf1/Rhou/Hey1/Gsn/Hes1/Ezr/Arpc5/Rac1/Frmd4a/Pdlim1/Arf6/Stk25/Nsfl1c/Pdzd11/Ift20/Hsp90ab1/Lin7c	18	GO_BP	up
GO:0006684	sphingomyelin metabolic process	4/1210	22/28891	0.0122479	0.0646142	0.0473844	Sgms2/Osbp/Prkcd/Vapa	4	GO_BP	up
GO:0045652	regulation of megakaryocyte differentiation	4/1210	22/28891	0.0122479	0.0646142	0.0473844	Hmgb2/Cib1/Pithd1/Prmt1	4	GO_BP	up
GO:0045737	positive regulation of cyclin-dependent protein serine/threonine kinase activity	4/1210	22/28891	0.0122479	0.0646142	0.0473844	Rgcc/Ccnd2/Pim1/Cdkn1b	4	GO_BP	up
GO:0097734	extracellular exosome biogenesis	4/1210	22/28891	0.0122479	0.0646142	0.0473844	Atp13a2/Tsg101/Sdc4/Rab11a	4	GO_BP	up
GO:0140467	integrated stress response signaling	4/1210	22/28891	0.0122479	0.0646142	0.0473844	Tmed2/Nfe2l2/Atf4/Eif2s1	4	GO_BP	up
GO:2000209	regulation of anoikis	4/1210	22/28891	0.0122479	0.0646142	0.0473844	Pdk4/Notch1/Ptrh2/Mcl1	4	GO_BP	up
GO:1903038	negative regulation of leukocyte cell-cell adhesion	13/1210	153/28891	0.0123227	0.0649462	0.0476279	Dapl1/Cd24a/Arg2/Nrarp/Hspb1/Cd274/Cebpb/Mdk/Irf1/Socs1/Sdc4/Prkar1a/Prdx2	13	GO_BP	up
GO:0007178	transmembrane receptor protein serine/threonine kinase signaling pathway	27/1210	405/28891	0.0123927	0.0652213	0.0478296	Gdf15/Cav2/Grem2/Hpgd/Got1/Lrp1/Notch1/Gipc1/Hes1/Cited2/Sub1/Pelo/Map3k1/Ing1/Sinhcaf/Csnk2b/Suds3/Prmt1/Pdcd4/Pin1/Stub1/Mapk3/Gas6/Hspa5/Hdac2/Tcf7l2/Rbpms	27	GO_BP	up
GO:0086001	cardiac muscle cell action potential	7/1210	60/28891	0.0124106	0.0652213	0.0478296	Nedd4l/Scn1b/Dsc2/Bin1/Calm3/Calm1/Jup	7	GO_BP	up
GO:1903533	regulation of protein targeting	7/1210	60/28891	0.0124106	0.0652213	0.0478296	Fyn/Hras/Cib1/Gdi1/Cdk5/Gsk3a/Fis1	7	GO_BP	up
GO:0071248	cellular response to metal ion	15/1210	187/28891	0.0124268	0.0652438	0.0478462	Cyp2a5/Atp13a2/Gsn/Cebpa/Tuba1a/Gsk3a/Stk39/Kcnh1/Clic4/Nfe2l2/Junb/Cpne8/Mapk3/Cdkn1b/Nfe2l1	15	GO_BP	up
GO:0009895	negative regulation of catabolic process	24/1210	349/28891	0.0125241	0.0656914	0.0481744	Dapl1/Fyn/Nupr1/Aqp11/Serpine2/Alad/Noct/Gipc1/Nqo1/Bag5/Zfp36/Ier3/Becn1/Rnf5/Psme3ip1/Pdcl3/Gabarapl2/Snx3/Pin1/Timp2/Mcl1/Rraga/Hsp90ab1/Rbm47	24	GO_BP	up
GO:0008361	regulation of cell size	17/1210	222/28891	0.0125509	0.065769	0.0482312	Crabp2/Aqp11/Nherf1/Tnfrsf12a/Sema3f/Lrp1/Akt1s1/Gdi1/Cdk5/Stk39/Ifrd1/Rac1/Eif2b2/Clns1a/Cttn/Hsp90ab1/Mtpn	17	GO_BP	up
GO:0002688	regulation of leukocyte chemotaxis	12/1210	137/28891	0.0126558	0.0662557	0.0485882	Pla2g7/Pgf/Edn2/Cxcl10/Mdk/Stk39/Cx3cl1/Rac1/Akirin1/Mapk3/Gas6/Mif	12	GO_BP	up
GO:0150115	cell-substrate junction organization	10/1210	105/28891	0.0126981	0.0664135	0.0487039	Fam107a/Fmn1/Lrp1/S100a10/Sdc4/Rac1/Actg1/Arf6/Cttn/Lamtor2	10	GO_BP	up
GO:0030301	cholesterol transport	11/1210	121/28891	0.0128088	0.0668645	0.0490347	Ces1d/Ces1b/Stard5/Lrp1/Osbp/Nfkbia/Osbpl6/Stard3nl/Nr1h2/Pltp/Vapa	11	GO_BP	up
GO:0071456	cellular response to hypoxia	11/1210	121/28891	0.0128088	0.0668645	0.0490347	Aqp3/Rgcc/Vldlr/Tmbim6/Notch1/Egln2/Cited2/Ubqln1/Nfe2l2/Stub1/P4hb	11	GO_BP	up
GO:0002828	regulation of type 2 immune response	5/1210	34/28891	0.0129506	0.0670784	0.0491915	Il33/Arg2/Cd81/Rara/Irf1	5	GO_BP	up
GO:0006972	hyperosmotic response	5/1210	34/28891	0.0129506	0.0670784	0.0491915	Efhd1/Stk39/Ybx3/Rac1/Xrcc5	5	GO_BP	up
GO:0009225	nucleotide-sugar metabolic process	5/1210	34/28891	0.0129506	0.0670784	0.0491915	Uap1/Ugdh/Gfus/Gfpt1/Gnpda2	5	GO_BP	up
GO:0010758	regulation of macrophage chemotaxis	5/1210	34/28891	0.0129506	0.0670784	0.0491915	Mdk/Cx3cl1/Akirin1/Mapk3/Mif	5	GO_BP	up
GO:0060914	heart formation	5/1210	34/28891	0.0129506	0.0670784	0.0491915	Six1/Rbm20/Notch1/Hes1/Pim1	5	GO_BP	up
GO:0060964	regulation of miRNA-mediated gene silencing	5/1210	34/28891	0.0129506	0.0670784	0.0491915	Bcdin3d/Ripk1/Zfp36/Nfkb1/Zmpste24	5	GO_BP	up
GO:0061050	regulation of cell growth involved in cardiac muscle cell development	5/1210	34/28891	0.0129506	0.0670784	0.0491915	Rgs4/Adrb1/Gsk3a/Pin1/Ddx39b	5	GO_BP	up
GO:0061842	microtubule organizing center localization	5/1210	34/28891	0.0129506	0.0670784	0.0491915	Nin/Ezr/Arpc5/Kif5b/Ift20	5	GO_BP	up
GO:0106106	cold-induced thermogenesis	13/1210	154/28891	0.01296	0.0670784	0.0491915	Ces1d/Sfxn5/Cebpb/Adrb1/Arrdc3/Notch1/Ucp2/Elovl6/Hadh/Abhd6/Adipor1/Nr1h2/Atf4	13	GO_BP	up
GO:0045860	positive regulation of protein kinase activity	25/1210	369/28891	0.0130486	0.0672449	0.0493136	Cd24a/Clu/Tcim/Cdkn1a/Hras/Rgcc/Fgf1/Nab2/Vldlr/Ccnd2/Cib1/Cdk5/Prkcd/Socs1/Map3k1/Ppp2r3c/Sdc4/Pim1/Gas6/Mif/Cdkn1b/Xrcc5/Abi1/Ralb/Hsp90ab1	25	GO_BP	up
GO:0001541	ovarian follicle development	8/1210	75/28891	0.0130649	0.0672449	0.0493136	Nppc/Grk2/Cebpb/Mmp2/Adrm1/Rac1/Eif2b2/Bax	8	GO_BP	up
GO:0007260	tyrosine phosphorylation of STAT protein	8/1210	75/28891	0.0130649	0.0672449	0.0493136	Tnfrsf18/Fyn/Hes1/Osbp/Irf1/Socs1/Ctf1/Hdac2	8	GO_BP	up
GO:0010633	negative regulation of epithelial cell migration	8/1210	75/28891	0.0130649	0.0672449	0.0493136	Stc1/Dcn/Rgcc/Notch1/Gadd45a/Csnk2b/Adipor1/Jup	8	GO_BP	up
GO:0043113	receptor clustering	8/1210	75/28891	0.0130649	0.0672449	0.0493136	Sorbs2/Cd81/Pick1/Gsn/Cdk5/Shisa6/Rer1/Snx27	8	GO_BP	up
GO:0045995	regulation of embryonic development	9/1210	90/28891	0.0130781	0.0672449	0.0493136	Jag1/Racgap1/Noct/Notch1/Hes1/Zbed3/Nfe2l2/Hspa5/Ruvbl1	9	GO_BP	up
GO:0072028	nephron morphogenesis	9/1210	90/28891	0.0130781	0.0672449	0.0493136	Irx3/Pgf/Fgf1/Hey1/Six1/Fmn1/Hes1/Lzts2/Sox9	9	GO_BP	up
GO:0009409	response to cold	6/1210	47/28891	0.0132076	0.0677835	0.0497086	Ces1d/Adrb1/Ucp2/Dnajc3/Slc27a1/Nfe2l1	6	GO_BP	up
GO:1900047	negative regulation of hemostasis	6/1210	47/28891	0.0132076	0.0677835	0.0497086	Plat/Serpine2/Cd9/Ubash3b/Prkcd/Anxa5	6	GO_BP	up
GO:0008406	gonad development	19/1210	259/28891	0.0132564	0.0679699	0.0498453	Nppc/Edn2/Grk2/Nupr1/Cebpb/Rab13/Hmgb2/Rara/Mmp2/Cited2/H3f3b/Adrm1/Eif2s2/Ybx3/Sox9/Rac1/Tmf1/Eif2b2/Bax	19	GO_BP	up
GO:0017015	regulation of transforming growth factor beta receptor signaling pathway	12/1210	138/28891	0.0133504	0.068388	0.0501519	Cav2/Got1/Lrp1/Gipc1/Cited2/Ing1/Sinhcaf/Suds3/Pin1/Stub1/Hspa5/Hdac2	12	GO_BP	up
GO:0006278	RNA-templated DNA biosynthetic process	7/1210	61/28891	0.0135271	0.0689704	0.050579	Cct7/Mapk3/Cct2/Tcp1/Xrcc5/Cct6a/Cct8	7	GO_BP	up
GO:0006903	vesicle targeting	7/1210	61/28891	0.0135271	0.0689704	0.050579	Trappc6b/Exoc7/Trappc2/Trappc4/Stard3nl/Trappc2l/Sar1b	7	GO_BP	up
GO:0007004	telomere maintenance via telomerase	7/1210	61/28891	0.0135271	0.0689704	0.050579	Cct7/Mapk3/Cct2/Tcp1/Xrcc5/Cct6a/Cct8	7	GO_BP	up
GO:0046676	negative regulation of insulin secretion	7/1210	61/28891	0.0135271	0.0689704	0.050579	Kcnj6/Gnao1/Pim3/Ucp2/Hadh/Ptpmt1/Eny2	7	GO_BP	up
GO:0097479	synaptic vesicle localization	7/1210	61/28891	0.0135271	0.0689704	0.050579	Rab3a/Bloc1s4/Cdk5/Snapin/Kif5b/Arf1/Tmem230	7	GO_BP	up
GO:0048839	inner ear development	17/1210	224/28891	0.0136157	0.0692628	0.0507934	Aldh1a3/Pls1/Nherf1/Atp8a2/Hey1/Jag1/Six1/Ccm2/Notch1/Hes1/Cebpa/Sdc4/Sox9/Rac1/Cdkn1b/Ift20/Anp32b	17	GO_BP	up
GO:0098876	vesicle-mediated transport to the plasma membrane	13/1210	155/28891	0.0136224	0.0692628	0.0507934	Rab13/Arl4c/Blzf1/Vps26c/Krt18/Chic2/Snx3/Arf6/Snap47/Stx6/Snx27/Rab11a/Vps29	13	GO_BP	up
GO:1904950	negative regulation of establishment of protein localization	13/1210	155/28891	0.0136224	0.0692628	0.0507934	Kcnj6/Gnao1/Pim3/Ucp2/Gdi1/Cdk5/Hadh/Frmd4a/Idh2/Snx3/Ptpmt1/Anxa5/Eny2	13	GO_BP	up
GO:0098739	import across plasma membrane	16/1210	207/28891	0.0139544	0.0708851	0.0519831	Kcnj6/Rgs4/Arg2/Atp1b1/Fyn/Nherf1/Adrb1/Slc1a4/Prkcd/Slc3a2/Arl6ip5/Atp1a1/Atp1b3/Ppp3r1/Slc27a1/Iscu	16	GO_BP	up
GO:0019080	viral gene expression	8/1210	76/28891	0.0140823	0.0712702	0.0522656	Notch1/Zfp36/Zfp639/Map3k1/Gtf2b/Trim8/Psmc3/Eif3l	8	GO_BP	up
GO:0042273	ribosomal large subunit biogenesis	8/1210	76/28891	0.0140823	0.0712702	0.0522656	Brix1/Mrto4/Rrs1/Mrpl20/Gtpbp4/Pak1ip1/Rplp0/Ebna1bp2	8	GO_BP	up
GO:0048645	animal organ formation	8/1210	76/28891	0.0140823	0.0712702	0.0522656	Fgf1/Six1/Rbm20/Notch1/Hes1/Cited2/Pim1/Mapk3	8	GO_BP	up
GO:1904705	regulation of vascular associated smooth muscle cell proliferation	8/1210	76/28891	0.0140823	0.0712702	0.0522656	Cdkn1a/Grk2/Ndrg2/Hpgd/Mmp2/Pdcd4/Cdkn1b/Ddx39b	8	GO_BP	up
GO:0019439	aromatic compound catabolic process	30/1210	467/28891	0.0141258	0.0714247	0.0523788	Cyp2f2/Dera/Urah/Carhsp1/Upb1/Isg20/Dnase2a/Noct/Rnaseh2a/Ephx1/Zfp36/Polr2g/Btg2/Pelo/Dut/Pcbp4/Eloc/Nudt3/Ttc5/Mrto4/Trir/Nudt18/Pnrc1/Bax/Qdpr/Cnot6/Rbm7/Comt/Lsm1/Rbm47	30	GO_BP	up
GO:2000241	regulation of reproductive process	17/1210	225/28891	0.014174	0.0716023	0.0525091	Plat/Nppc/Nupr1/Jag1/Notch1/Cib1/Cited2/Tpst2/B4galt1/Ybx3/Sox9/Rac1/Bax/Ube2b/Hdac2/Cdkn1b/Anxa5	17	GO_BP	up
GO:0034249	negative regulation of amide metabolic process	18/1210	243/28891	0.014275	0.0717363	0.0526073	Clu/Dapk1/Noct/Rara/Zfp36/Polr2g/Btg2/Rbm4/Gapdh/Pin1/Eif4e/Bin1/Cnot6/Lsm1/Srp9/Mrpl13/Paip2/Eif2s1	18	GO_BP	up
GO:0050920	regulation of chemotaxis	18/1210	243/28891	0.014275	0.0717363	0.0526073	Pla2g7/Pgf/Edn2/Hspb1/Fgf1/Cxcl10/Sema3f/Mdk/Notch1/Tubb2b/Stk39/Cx3cl1/Rac1/Akirin1/Mapk3/Gas6/Mif/Cttn	18	GO_BP	up
GO:0031098	stress-activated protein kinase signaling cascade	19/1210	261/28891	0.0142781	0.0717363	0.0526073	Hras/Ripk1/Trib1/Gsn/Gadd45b/Zfp36/Gadd45a/Rell1/Map3k1/Stk39/Ezr/Ltbr/Arl6ip5/Nfkb1/Prmt1/Stk25/Mapk3/Zmpste24/Prdx1	19	GO_BP	up
GO:0090092	regulation of transmembrane receptor protein serine/threonine kinase signaling pathway	19/1210	261/28891	0.0142781	0.0717363	0.0526073	Cav2/Grem2/Got1/Lrp1/Notch1/Gipc1/Hes1/Cited2/Pelo/Ing1/Sinhcaf/Csnk2b/Suds3/Prmt1/Pin1/Stub1/Hspa5/Hdac2/Tcf7l2	19	GO_BP	up
GO:1990845	adaptive thermogenesis	14/1210	173/28891	0.0143373	0.0717363	0.0526073	Ces1d/Sfxn5/Cebpb/Adrb1/Arrdc3/Notch1/Ucp2/Elovl6/Hadh/Abhd6/Adipor1/Nr1h2/Slc25a5/Atf4	14	GO_BP	up
GO:0003177	pulmonary valve development	4/1210	23/28891	0.0143446	0.0717363	0.0526073	Hey1/Jag1/Heyl/Notch1	4	GO_BP	up
GO:0006595	polyamine metabolic process	4/1210	23/28891	0.0143446	0.0717363	0.0526073	Smox/Dhps/Sms/Oaz1	4	GO_BP	up
GO:0031579	membrane raft organization	4/1210	23/28891	0.0143446	0.0717363	0.0526073	Cav2/Gsn/S100a10/Flot1	4	GO_BP	up
GO:0042053	regulation of dopamine metabolic process	4/1210	23/28891	0.0143446	0.0717363	0.0526073	Nr4a2/Aldh2/Pnkd/Comt	4	GO_BP	up
GO:0060253	negative regulation of glial cell proliferation	4/1210	23/28891	0.0143446	0.0717363	0.0526073	Notch1/Hes1/Cers2/Idh2	4	GO_BP	up
GO:0090141	positive regulation of mitochondrial fission	4/1210	23/28891	0.0143446	0.0717363	0.0526073	Dcn/Ralbp1/Rala/Fis1	4	GO_BP	up
GO:0007548	sex differentiation	23/1210	335/28891	0.0145301	0.0720949	0.0528703	Nppc/Edn2/Grk2/Nupr1/Srd5a1/Cebpb/Rab13/Hmgb2/Rara/Mmp2/Cited2/Fkbp4/H3f3b/Adrm1/Eif2s2/Dmrt2/Ybx3/Sox9/Rac1/Tmf1/Eif2b2/Bax/Tcf7l2	23	GO_BP	up
GO:0003298	physiological muscle hypertrophy	6/1210	48/28891	0.0145741	0.0720949	0.0528703	Rgs4/Sorbs2/Adrb1/Gsk3a/Pin1/Ddx39b	6	GO_BP	up
GO:0003301	physiological cardiac muscle hypertrophy	6/1210	48/28891	0.0145741	0.0720949	0.0528703	Rgs4/Sorbs2/Adrb1/Gsk3a/Pin1/Ddx39b	6	GO_BP	up
GO:0055023	positive regulation of cardiac muscle tissue growth	6/1210	48/28891	0.0145741	0.0720949	0.0528703	Adrb1/Ccnd2/Notch1/Pim1/Pin1/Ddx39b	6	GO_BP	up
GO:0060122	inner ear receptor cell stereocilium organization	6/1210	48/28891	0.0145741	0.0720949	0.0528703	Pls1/Nherf1/Hey1/Hes1/Sdc4/Ift20	6	GO_BP	up
GO:0061049	cell growth involved in cardiac muscle cell development	6/1210	48/28891	0.0145741	0.0720949	0.0528703	Rgs4/Sorbs2/Adrb1/Gsk3a/Pin1/Ddx39b	6	GO_BP	up
GO:0086009	membrane repolarization	6/1210	48/28891	0.0145741	0.0720949	0.0528703	Atp1b1/Nedd4l/Scn1b/Atp1a1/Atp1b3/Zmpste24	6	GO_BP	up
GO:0098927	vesicle-mediated transport between endosomal compartments	6/1210	48/28891	0.0145741	0.0720949	0.0528703	Becn1/Ezr/Snx3/Mapk3/Sh3glb1/Rab11a	6	GO_BP	up
GO:0007007	inner mitochondrial membrane organization	5/1210	35/28891	0.0146007	0.0720949	0.0528703	Maip1/Slc25a46/Bax/Ghitm/Micos13	5	GO_BP	up
GO:0034110	regulation of homotypic cell-cell adhesion	5/1210	35/28891	0.0146007	0.0720949	0.0528703	Cd24a/Serpine2/Cd9/Ubash3b/Prkcd	5	GO_BP	up
GO:0048499	synaptic vesicle membrane organization	5/1210	35/28891	0.0146007	0.0720949	0.0528703	Rab3a/Syngr1/Snapin/Stx11/Snap47	5	GO_BP	up
GO:0071404	cellular response to low-density lipoprotein particle stimulus	5/1210	35/28891	0.0146007	0.0720949	0.0528703	Ces1d/Ces1b/Cd81/Cd9/Mylip	5	GO_BP	up
GO:0150117	positive regulation of cell-substrate junction organization	5/1210	35/28891	0.0146007	0.0720949	0.0528703	Fmn1/S100a10/Sdc4/Rac1/Arf6	5	GO_BP	up
GO:1900368	regulation of post-transcriptional gene silencing by regulatory ncRNA	5/1210	35/28891	0.0146007	0.0720949	0.0528703	Bcdin3d/Ripk1/Zfp36/Nfkb1/Zmpste24	5	GO_BP	up
GO:0002011	morphogenesis of an epithelial sheet	7/1210	62/28891	0.0147136	0.0724566	0.0531356	Plet1/Arhgap24/Jag1/Notch1/Map3k1/Cd151/Lin7c	7	GO_BP	up
GO:0021575	hindbrain morphogenesis	7/1210	62/28891	0.0147136	0.0724566	0.0531356	Serpine2/Hes1/Tuba1a/Cdk5/Slc25a46/Hspa5/Nfix	7	GO_BP	up
GO:0060711	labyrinthine layer development	7/1210	62/28891	0.0147136	0.0724566	0.0531356	Hey1/Hes1/St14/Tmed2/Dnajb6/Junb/Grb2	7	GO_BP	up
GO:0006814	sodium ion transport	19/1210	262/28891	0.0148116	0.0728737	0.0534414	Cxcl1/Kcnk1/Atp1b1/Slc5a9/Serpine2/Prss8/Nherf1/Nedd4l/Sgk1/Pick1/Fxyd3/Scn1b/Stk39/Commd3/Atp1a1/Atp1b3/Kif5b/Cpox/Arf1	19	GO_BP	up
GO:0061333	renal tubule morphogenesis	9/1210	92/28891	0.0149504	0.0734906	0.0538939	Irx3/Pgf/Fgf1/Hey1/Six1/Fmn1/Hes1/Lzts2/Sox9	9	GO_BP	up
GO:0001838	embryonic epithelial tube formation	13/1210	157/28891	0.0150247	0.0737896	0.0541131	Irx3/Six1/Rara/Lmo4/Cited2/Casp8/Coq7/St14/Vasp/Tmed2/Sdc4/Sox9/Rala	13	GO_BP	up
GO:0001756	somitogenesis	8/1210	77/28891	0.015156	0.0742347	0.0544395	Meox1/Nrarp/Notch1/Dmrt2/Tmed2/Taf10/Pax1/Abi1	8	GO_BP	up
GO:0046847	filopodium assembly	8/1210	77/28891	0.015156	0.0742347	0.0544395	Rab3ip/Prkcd/Ezr/Rac1/Arf6/Rala/Mien1/Capzb	8	GO_BP	up
GO:1904036	negative regulation of epithelial cell apoptotic process	8/1210	77/28891	0.015156	0.0742347	0.0544395	Nupr1/Pak4/Mdk/Nfe2l2/Tmf1/Gas6/Cdkn1b/Tcf7l2	8	GO_BP	up
GO:0015918	sterol transport	11/1210	124/28891	0.0151708	0.0742408	0.054444	Ces1d/Ces1b/Stard5/Lrp1/Osbp/Nfkbia/Osbpl6/Stard3nl/Nr1h2/Pltp/Vapa	11	GO_BP	up
GO:0002328	pro-B cell differentiation	3/1210	13/28891	0.0152934	0.0742434	0.0544459	Notch1/Hes1/Sox4	3	GO_BP	up
GO:0007042	lysosomal lumen acidification	3/1210	13/28891	0.0152934	0.0742434	0.0544459	Tmem199/Snapin/Atp6v0c	3	GO_BP	up
GO:0007341	penetration of zona pellucida	3/1210	13/28891	0.0152934	0.0742434	0.0544459	B4galt1/Pithd1/Hexb	3	GO_BP	up
GO:0035437	maintenance of protein localization in endoplasmic reticulum	3/1210	13/28891	0.0152934	0.0742434	0.0544459	Kdelr2/Rer1/Hspa5	3	GO_BP	up
GO:0038133	ERBB2-ERBB3 signaling pathway	3/1210	13/28891	0.0152934	0.0742434	0.0544459	Hras/Mapk3/Grb2	3	GO_BP	up
GO:0042402	cellular biogenic amine catabolic process	3/1210	13/28891	0.0152934	0.0742434	0.0544459	Smox/Dhps/Comt	3	GO_BP	up
GO:0042761	very long-chain fatty acid biosynthetic process	3/1210	13/28891	0.0152934	0.0742434	0.0544459	Hacd2/Elovl7/Elovl6	3	GO_BP	up
GO:0045136	development of secondary sexual characteristics	3/1210	13/28891	0.0152934	0.0742434	0.0544459	Irf2bpl/B4galt1/Bax	3	GO_BP	up
GO:0060213	positive regulation of nuclear-transcribed mRNA poly(A) tail shortening	3/1210	13/28891	0.0152934	0.0742434	0.0544459	Zfp36/Polr2g/Btg2	3	GO_BP	up
GO:0045137	development of primary sexual characteristics	19/1210	263/28891	0.0153607	0.0745041	0.0546371	Nppc/Edn2/Grk2/Nupr1/Cebpb/Rab13/Hmgb2/Rara/Mmp2/Cited2/H3f3b/Adrm1/Eif2s2/Ybx3/Sox9/Rac1/Tmf1/Eif2b2/Bax	19	GO_BP	up
GO:1903844	regulation of cellular response to transforming growth factor beta stimulus	12/1210	141/28891	0.0156092	0.0756423	0.0554718	Cav2/Got1/Lrp1/Gipc1/Cited2/Ing1/Sinhcaf/Suds3/Pin1/Stub1/Hspa5/Hdac2	12	GO_BP	up
GO:0022612	gland morphogenesis	13/1210	158/28891	0.015766	0.0763346	0.0559795	Nherf1/Fgf1/Elf3/Cebpb/Polb/Mdk/Notch1/Mmp2/Serpinb5/Sox9/Kdm5b/Nfkb1/Bax	13	GO_BP	up
GO:0070302	regulation of stress-activated protein kinase signaling cascade	16/1210	210/28891	0.0158008	0.0764356	0.0560536	Hras/Ripk1/Gsn/Gadd45b/Gadd45a/Rell1/Map3k1/Stk39/Ezr/Ltbr/Arl6ip5/Prmt1/Stk25/Mapk3/Zmpste24/Prdx1	16	GO_BP	up
GO:1901361	organic cyclic compound catabolic process	31/1210	491/28891	0.0159477	0.0769264	0.0564135	Cyp2f2/Dera/Urah/Srd5a1/Carhsp1/Upb1/Isg20/Dnase2a/Noct/Rnaseh2a/Zfp36/Polr2g/Btg2/Pelo/Dut/Pcbp4/Eloc/Nudt3/Ttc5/Mrto4/Trir/Nudt18/Nfe2l2/Pnrc1/Bax/Qdpr/Cnot6/Rbm7/Comt/Lsm1/Rbm47	31	GO_BP	up
GO:0014015	positive regulation of gliogenesis	9/1210	93/28891	0.0159573	0.0769264	0.0564135	Il33/Serpine2/Nkx6-2/Prpf19/Mdk/Notch1/Hes1/Bin1/Hdac2	9	GO_BP	up
GO:0015914	phospholipid transport	9/1210	93/28891	0.0159573	0.0769264	0.0564135	Tmem30b/Atp8a2/Osbp/Prkcd/Prelid3b/Pltp/Vapa/Pitpnb/Tmem30a	9	GO_BP	up
GO:0010712	regulation of collagen metabolic process	7/1210	63/28891	0.0159725	0.0769264	0.0564135	Nppc/Rgcc/Got1/Cygb/Notch1/Prdx5/Suco	7	GO_BP	up
GO:0042491	inner ear auditory receptor cell differentiation	7/1210	63/28891	0.0159725	0.0769264	0.0564135	Pls1/Nherf1/Hey1/Jag1/Notch1/Hes1/Rac1	7	GO_BP	up
GO:0006998	nuclear envelope organization	6/1210	49/28891	0.0160359	0.0769609	0.0564388	Chmp4c/Chmp1b/Chmp5/Ubxn2a/Nsfl1c/Zmpste24	6	GO_BP	up
GO:0030890	positive regulation of B cell proliferation	6/1210	49/28891	0.0160359	0.0769609	0.0564388	Cdkn1a/Bmi1/Cd81/Tcf3/Il7/Mif	6	GO_BP	up
GO:0050819	negative regulation of coagulation	6/1210	49/28891	0.0160359	0.0769609	0.0564388	Plat/Serpine2/Cd9/Ubash3b/Prkcd/Anxa5	6	GO_BP	up
GO:1903115	regulation of actin filament-based movement	6/1210	49/28891	0.0160359	0.0769609	0.0564388	Stc1/Adrb1/Atp1a1/Dsc2/Bin1/Jup	6	GO_BP	up
GO:0010660	regulation of muscle cell apoptotic process	10/1210	109/28891	0.016186	0.0775456	0.0568675	Fbxo32/Grk2/Nupr1/Acot1/Mdk/Gapdh/Nfe2l2/Pcmt1/Pdcd4/Atf4	10	GO_BP	up
GO:0090263	positive regulation of canonical Wnt signaling pathway	10/1210	109/28891	0.016186	0.0775456	0.0568675	Nrarp/Tbl1xr1/Map3k1/Sox4/Zbed3/Nfkb1/Pin1/Ube2b/Csnk1e/Ruvbl1	10	GO_BP	up
GO:0006919	activation of cysteine-type endopeptidase activity involved in apoptotic process	8/1210	78/28891	0.0162879	0.0777548	0.057021	F3/Casp8/Cycs/Bax/Rps27l/Hspd1/Anp32b/Rnf7	8	GO_BP	up
GO:0038034	signal transduction in absence of ligand	8/1210	78/28891	0.0162879	0.0777548	0.057021	Fyn/Ripk1/Gsk3a/Cx3cl1/Il7/Prdx2/Bax/Mcl1	8	GO_BP	up
GO:0072171	mesonephric tubule morphogenesis	8/1210	78/28891	0.0162879	0.0777548	0.057021	Pgf/Fgf1/Hey1/Six1/Fmn1/Hes1/Lzts2/Sox9	8	GO_BP	up
GO:0097192	extrinsic apoptotic signaling pathway in absence of ligand	8/1210	78/28891	0.0162879	0.0777548	0.057021	Fyn/Ripk1/Gsk3a/Cx3cl1/Il7/Prdx2/Bax/Mcl1	8	GO_BP	up
GO:0010038	response to metal ion	22/1210	320/28891	0.0163336	0.0777548	0.057021	Cyp2a5/Fibin/Atp13a2/Alad/Gsn/Cebpa/Tuba1a/Gdi1/Ppp5c/Gsk3a/Stk39/Kcnh1/Clic4/Nfe2l2/Junb/Cpne8/Mapk3/Calm3/Cdkn1b/Nfe2l1/Anxa5/Calm1	22	GO_BP	up
GO:0006084	acetyl-CoA metabolic process	5/1210	36/28891	0.0163859	0.0777548	0.057021	Pdk4/Vdac1/Ppcs/Pdhb/Mpc1	5	GO_BP	up
GO:0042168	heme metabolic process	5/1210	36/28891	0.0163859	0.0777548	0.057021	Cyp2a5/Alas1/Alad/Snx3/Cpox	5	GO_BP	up
GO:0043537	negative regulation of blood vessel endothelial cell migration	5/1210	36/28891	0.0163859	0.0777548	0.057021	Rgcc/Notch1/Gadd45a/Csnk2b/Jup	5	GO_BP	up
GO:0048710	regulation of astrocyte differentiation	5/1210	36/28891	0.0163859	0.0777548	0.057021	Serpine2/Prpf19/Notch1/Hes1/Bin1	5	GO_BP	up
GO:0055094	response to lipoprotein particle	5/1210	36/28891	0.0163859	0.0777548	0.057021	Ces1d/Ces1b/Cd81/Cd9/Mylip	5	GO_BP	up
GO:0060147	regulation of post-transcriptional gene silencing	5/1210	36/28891	0.0163859	0.0777548	0.057021	Bcdin3d/Ripk1/Zfp36/Nfkb1/Zmpste24	5	GO_BP	up
GO:0006997	nucleus organization	12/1210	142/28891	0.0164229	0.0777955	0.0570508	Nectin2/Hmgb2/H3f3b/Chmp4c/Chmp1b/Chmp5/Tmf1/Ubxn2a/Nsfl1c/Bin1/Zmpste24/Nfe2l1	12	GO_BP	up
GO:0008360	regulation of cell shape	12/1210	142/28891	0.0164229	0.0777955	0.0570508	Gm14137/Fyn/Nherf1/Cdc42ep2/Rhou/Sh3kbp1/Ezr/Rac1/Hexb/Zmpste24/Myl12b/Myl12a	12	GO_BP	up
GO:0010640	regulation of platelet-derived growth factor receptor signaling pathway	4/1210	24/28891	0.0166551	0.0782191	0.0573615	F3/Nherf1/Lrp1/Ift20	4	GO_BP	up
GO:0014856	skeletal muscle cell proliferation	4/1210	24/28891	0.0166551	0.0782191	0.0573615	Cav2/Six1/Akirin1/Sugt1	4	GO_BP	up
GO:0018904	ether metabolic process	4/1210	24/28891	0.0166551	0.0782191	0.0573615	Pla2g7/Peds1/Chpt1/Ephx1	4	GO_BP	up
GO:0033617	mitochondrial cytochrome c oxidase assembly	4/1210	24/28891	0.0166551	0.0782191	0.0573615	Cox17/Cox19/Uqcc6/Cox14	4	GO_BP	up
GO:0043555	regulation of translation in response to stress	4/1210	24/28891	0.0166551	0.0782191	0.0573615	Dnajc3/Rbm4/Tmed2/Eif2s1	4	GO_BP	up
GO:0045116	protein neddylation	4/1210	24/28891	0.0166551	0.0782191	0.0573615	Rbx1/Ube2m/Ube2f/Rnf7	4	GO_BP	up
GO:0090330	regulation of platelet aggregation	4/1210	24/28891	0.0166551	0.0782191	0.0573615	Serpine2/Cd9/Ubash3b/Prkcd	4	GO_BP	up
GO:0097398	cellular response to interleukin-17	4/1210	24/28891	0.0166551	0.0782191	0.0573615	Cxcl1/Cxcl10/Notch1/Nfkb1	4	GO_BP	up
GO:0140112	extracellular vesicle biogenesis	4/1210	24/28891	0.0166551	0.0782191	0.0573615	Atp13a2/Tsg101/Sdc4/Rab11a	4	GO_BP	up
GO:2000269	regulation of fibroblast apoptotic process	4/1210	24/28891	0.0166551	0.0782191	0.0573615	Nupr1/Socs1/Ier3ip1/Gas6	4	GO_BP	up
GO:0030512	negative regulation of transforming growth factor beta receptor signaling pathway	9/1210	94/28891	0.0170129	0.0796262	0.0583934	Cav2/Lrp1/Ing1/Sinhcaf/Suds3/Pin1/Stub1/Hspa5/Hdac2	9	GO_BP	up
GO:0043648	dicarboxylic acid metabolic process	9/1210	94/28891	0.0170129	0.0796262	0.0583934	Got1/Idh1/Mdh2/Aasdhppt/Gclc/Sdhb/Glul/Gclm/Suclg1	9	GO_BP	up
GO:0048708	astrocyte differentiation	9/1210	94/28891	0.0170129	0.0796262	0.0583934	Serpine2/Prpf19/Lrp1/Notch1/Hes1/Sox9/Mapk3/Bin1/Nfix	9	GO_BP	up
GO:0050871	positive regulation of B cell activation	9/1210	94/28891	0.0170129	0.0796262	0.0583934	Cdkn1a/Bmi1/Cd81/Sh3kbp1/Ppp2r3c/Tcf3/Il7/Mif/Akirin2	9	GO_BP	up
GO:0071805	potassium ion transmembrane transport	16/1210	212/28891	0.017133	0.0801198	0.0587553	Kcnj6/Kcnk1/Rgs4/Atp1b1/Dpp10/Nedd4l/Tmem38a/Pick1/Gnb2/Stk39/Kcnh1/Atp1a1/Atp1b3/Bin1/Ghitm/Snx27	16	GO_BP	up
GO:0010595	positive regulation of endothelial cell migration	10/1210	110/28891	0.0171592	0.0801738	0.0587949	Plk2/Hspb1/Fgf1/Cib1/Rhob/Rac1/Gfus/Bsg/Nfe2l2/Col18a1	10	GO_BP	up
GO:0050767	regulation of neurogenesis	31/1210	494/28891	0.0172184	0.0802579	0.0588566	Il33/Crabp2/Cd24a/Serpine2/Nkx6-2/Prpf19/Tnfrsf12a/Hey1/Sema3f/Heyl/Hmgb2/Sgk1/Lrp1/Mdk/Notch1/Hes1/Cers2/Gdi1/Cdk5/Btg2/Nin/S100a10/Ifrd1/Cx3cl1/Idh2/Stk25/Eif2b2/Bin1/Hdac2/Xrcc5/Sh3glb1	31	GO_BP	up
GO:0051403	stress-activated MAPK cascade	18/1210	248/28891	0.0172212	0.0802579	0.0588566	Hras/Ripk1/Trib1/Gsn/Gadd45b/Zfp36/Gadd45a/Rell1/Map3k1/Stk39/Ezr/Ltbr/Arl6ip5/Nfkb1/Prmt1/Stk25/Mapk3/Prdx1	18	GO_BP	up
GO:1901617	organic hydroxy compound biosynthetic process	18/1210	248/28891	0.0172212	0.0802579	0.0588566	Ces1d/Ces1b/Sptssb/Hsd17b7/Nr4a2/Fgf1/Aldh2/Got1/Gipc1/Ephx1/Sqle/Sc5d/Nfkb1/Cyb5r3/Qdpr/Pcbd2/Pltp/Spr	18	GO_BP	up
GO:0046434	organophosphate catabolic process	12/1210	143/28891	0.0172681	0.08034	0.0589168	Pla2g7/Dera/Urah/Upb1/Idh1/Gpcpd1/Prkcd/Dut/Nudt3/Abhd12/Nudt18/Abhd6	12	GO_BP	up
GO:0050852	T cell receptor signaling pathway	12/1210	143/28891	0.0172681	0.08034	0.0589168	Skint3/Fyb/Fyn/Cd81/Nectin2/Hras/Eif2b3/Fyb2/Ezr/Eif2b2/Nras/Ube2n	12	GO_BP	up
GO:0051893	regulation of focal adhesion assembly	7/1210	64/28891	0.0173058	0.0803788	0.0589452	Fam107a/Fmn1/Lrp1/S100a10/Sdc4/Rac1/Actg1	7	GO_BP	up
GO:0090109	regulation of cell-substrate junction assembly	7/1210	64/28891	0.0173058	0.0803788	0.0589452	Fam107a/Fmn1/Lrp1/S100a10/Sdc4/Rac1/Actg1	7	GO_BP	up
GO:0007584	response to nutrient	8/1210	79/28891	0.0174795	0.0811166	0.0594864	Alad/Cdkn2d/Kat2b/Usf2/Mlx/Pim1/Gas6/Csnk1a1	8	GO_BP	up
GO:0045214	sarcomere organization	6/1210	50/28891	0.0175957	0.081518	0.0597807	Krt19/Neurl2/Krt8/Prkar1a/Actg1/Hdac2	6	GO_BP	up
GO:1903426	regulation of reactive oxygen species biosynthetic process	6/1210	50/28891	0.0175957	0.081518	0.0597807	Arg2/Duoxa1/Fyn/Ndufc2/Hbp1/Hspd1	6	GO_BP	up
GO:0140014	mitotic nuclear division	19/1210	267/28891	0.0177182	0.0820157	0.0601457	Rgcc/Racgap1/Becn1/Chmp4c/Chmp1b/Chmp5/Zwint/Dync1li1/Kat2b/Rrs1/Smc4/Ranbp1/Nsfl1c/Mzt1/Cdkn1b/Nfe2l1/Pebp1/Nfix/Rab11a	19	GO_BP	up
GO:1902904	negative regulation of supramolecular fiber organization	14/1210	178/28891	0.0179561	0.0830468	0.0609018	Clu/Capg/Pfdn4/Sgk1/Pick1/Gsn/Cib1/Fkbp4/Prkcd/Map3k1/Pfdn2/Twf1/Capzb/Mtpn	14	GO_BP	up
GO:0046486	glycerolipid metabolic process	25/1210	380/28891	0.018134	0.0837989	0.0614534	Ces1d/Pla2g7/Gk5/Pigf/Plcd4/Tbl1xr1/Serinc5/Chpt1/Gpcpd1/Pnpla2/Socs1/Becn1/Abhd12/Pip4k2c/Abhd5/Bpnt1/Cds1/Abhd6/Impa1/Slc27a1/Ptpmt1/Nr1h2/Tcf7l2/Sh3glb1/Hadha	25	GO_BP	up
GO:0010667	negative regulation of cardiac muscle cell apoptotic process	5/1210	37/28891	0.0183104	0.0844715	0.0619466	Nupr1/Acot1/Mdk/Nfe2l2/Pcmt1	5	GO_BP	up
GO:0060966	regulation of gene silencing by regulatory ncRNA	5/1210	37/28891	0.0183104	0.0844715	0.0619466	Bcdin3d/Ripk1/Zfp36/Nfkb1/Zmpste24	5	GO_BP	up
GO:0006936	muscle contraction	22/1210	324/28891	0.0185513	0.0852474	0.0625156	Stc1/Trim63/Arg2/Atp1b1/Edn2/Grk2/Nedd4l/Tmem38a/Stac/Atp8a2/Adrb1/Gsn/Scn1b/Atp1a1/Dsc2/Bin1/Calm3/Cttn/Calm1/Jup/Fkbp1a/Tpm3	22	GO_BP	up
GO:0016126	sterol biosynthetic process	7/1210	65/28891	0.0187157	0.0852474	0.0625156	Ces1d/Ces1b/Hsd17b7/Fgf1/Sqle/Sc5d/Cyb5r3	7	GO_BP	up
GO:0032964	collagen biosynthetic process	7/1210	65/28891	0.0187157	0.0852474	0.0625156	Nppc/Rgcc/Got1/Cygb/Notch1/Prdx5/Suco	7	GO_BP	up
GO:1903036	positive regulation of response to wounding	8/1210	80/28891	0.0187324	0.0852474	0.0625156	Plat/Cd24a/Hras/Lrp1/Mdk/Actg1/Prdx2/Nfe2l2	8	GO_BP	up
GO:0061041	regulation of wound healing	11/1210	128/28891	0.0188113	0.0852474	0.0625156	Plat/Serpine2/Hras/Tnfrsf12a/Cd9/Ubash3b/Prkcd/Actg1/Prdx2/Nfe2l2/Anxa5	11	GO_BP	up
GO:2000278	regulation of DNA biosynthetic process	11/1210	128/28891	0.0188113	0.0852474	0.0625156	Nppc/Cdkn1a/Rgcc/Cct7/Mapk3/Cct2/Tcp1/Xrcc5/Cct6a/Ddx39b/Cct8	11	GO_BP	up
GO:0000279	M phase	3/1210	14/28891	0.0188678	0.0852474	0.0625156	Ube2b/Nfe2l1/Xrcc5	3	GO_BP	up
GO:0009310	amine catabolic process	3/1210	14/28891	0.0188678	0.0852474	0.0625156	Smox/Dhps/Comt	3	GO_BP	up
GO:0010739	positive regulation of protein kinase A signaling	3/1210	14/28891	0.0188678	0.0852474	0.0625156	Tcim/Akap12/Mif	3	GO_BP	up
GO:0018342	protein prenylation	3/1210	14/28891	0.0188678	0.0852474	0.0625156	Rabggta/Rabggtb/Fnta	3	GO_BP	up
GO:0030497	fatty acid elongation	3/1210	14/28891	0.0188678	0.0852474	0.0625156	Hacd2/Elovl7/Elovl6	3	GO_BP	up
GO:0036490	regulation of translation in response to endoplasmic reticulum stress	3/1210	14/28891	0.0188678	0.0852474	0.0625156	Dnajc3/Tmed2/Eif2s1	3	GO_BP	up
GO:0038129	ERBB3 signaling pathway	3/1210	14/28891	0.0188678	0.0852474	0.0625156	Hras/Mapk3/Grb2	3	GO_BP	up
GO:0042762	regulation of sulfur metabolic process	3/1210	14/28891	0.0188678	0.0852474	0.0625156	Pdk4/Comt/Tcf7l2	3	GO_BP	up
GO:0046598	positive regulation of viral entry into host cell	3/1210	14/28891	0.0188678	0.0852474	0.0625156	Tmprss2/Bsg/P4hb	3	GO_BP	up
GO:0051036	regulation of endosome size	3/1210	14/28891	0.0188678	0.0852474	0.0625156	Snapin/Borcs8/Rab11a	3	GO_BP	up
GO:0060670	branching involved in labyrinthine layer morphogenesis	3/1210	14/28891	0.0188678	0.0852474	0.0625156	St14/Tmed2/Grb2	3	GO_BP	up
GO:0071895	odontoblast differentiation	3/1210	14/28891	0.0188678	0.0852474	0.0625156	Cebpb/Tubb5/Nfe2l1	3	GO_BP	up
GO:0075294	positive regulation by symbiont of entry into host	3/1210	14/28891	0.0188678	0.0852474	0.0625156	Tmprss2/Bsg/P4hb	3	GO_BP	up
GO:0097354	prenylation	3/1210	14/28891	0.0188678	0.0852474	0.0625156	Rabggta/Rabggtb/Fnta	3	GO_BP	up
GO:0098762	meiotic cell cycle phase	3/1210	14/28891	0.0188678	0.0852474	0.0625156	Ube2b/Nfe2l1/Xrcc5	3	GO_BP	up
GO:0106014	regulation of inflammatory response to wounding	3/1210	14/28891	0.0188678	0.0852474	0.0625156	Il33/Cd24a/Mdk	3	GO_BP	up
GO:0140042	lipid droplet formation	3/1210	14/28891	0.0188678	0.0852474	0.0625156	Smim22/Sqle/Cds1	3	GO_BP	up
GO:1903867	extraembryonic membrane development	3/1210	14/28891	0.0188678	0.0852474	0.0625156	Tmed2/Dnajb6/Taf10	3	GO_BP	up
GO:2000674	regulation of type B pancreatic cell apoptotic process	3/1210	14/28891	0.0188678	0.0852474	0.0625156	Capn10/Tcf7l2/Eif2s1	3	GO_BP	up
GO:0035270	endocrine system development	12/1210	145/28891	0.0190562	0.0859554	0.0630349	Clu/Nkx6-2/Six1/Mdk/Hes1/Cited2/Sox4/Sox9/Mapk3/Pax1/Tcf7l2/Ly6e	12	GO_BP	up
GO:1903313	positive regulation of mRNA metabolic process	12/1210	145/28891	0.0190562	0.0859554	0.0630349	Celf4/Prpf19/Noct/Zfp36/Paf1/Polr2g/Btg2/Ttc5/Leo1/Clns1a/Cnot6/Lsm1	12	GO_BP	up
GO:0032496	response to lipopolysaccharide	26/1210	401/28891	0.0191151	0.0859554	0.0630349	Cxcl1/Spon2/Arid5a/Selenos/Cd274/Cxcl10/Cebpb/Noct/Hmgb2/Trib1/Rara/Nqo1/Zfp36/Paf1/Nfkbia/Chmp5/Cx3cl1/Tcf3/Nfkb1/Prdx2/Pdcd4/Mapk3/Hadhb/Mif/Akirin2/Adh5	26	GO_BP	up
GO:0007035	vacuolar acidification	4/1210	25/28891	0.0191854	0.0859554	0.0630349	Tmem199/Snapin/Clic4/Atp6v0c	4	GO_BP	up
GO:0010759	positive regulation of macrophage chemotaxis	4/1210	25/28891	0.0191854	0.0859554	0.0630349	Mdk/Cx3cl1/Akirin1/Mapk3	4	GO_BP	up
GO:0042069	regulation of catecholamine metabolic process	4/1210	25/28891	0.0191854	0.0859554	0.0630349	Nr4a2/Aldh2/Pnkd/Comt	4	GO_BP	up
GO:0044090	positive regulation of vacuole organization	4/1210	25/28891	0.0191854	0.0859554	0.0630349	Becn1/Pip4k2c/Sh3glb1/Ralb	4	GO_BP	up
GO:1902410	mitotic cytokinetic process	4/1210	25/28891	0.0191854	0.0859554	0.0630349	Chmp4c/Chmp1b/Chmp5/Arf1	4	GO_BP	up
GO:1902455	negative regulation of stem cell population maintenance	4/1210	25/28891	0.0191854	0.0859554	0.0630349	Ing1/Sinhcaf/Suds3/Hdac2	4	GO_BP	up
GO:0060349	bone morphogenesis	10/1210	112/28891	0.0192341	0.0859554	0.0630349	Stc1/Rarb/Nppc/Nab2/Rara/Cited2/Sox9/Zmpste24/Pax1/Nfix	10	GO_BP	up
GO:0000266	mitochondrial fission	6/1210	51/28891	0.0192566	0.0859554	0.0630349	Dcn/Ucp2/Slc25a46/Ralbp1/Rala/Fis1	6	GO_BP	up
GO:0030219	megakaryocyte differentiation	6/1210	51/28891	0.0192566	0.0859554	0.0630349	Hmgb2/Cib1/Pithd1/Prmt1/Abi1/Uba5	6	GO_BP	up
GO:0060135	maternal process involved in female pregnancy	6/1210	51/28891	0.0192566	0.0859554	0.0630349	Cited2/Ndrg3/Tmed2/Ctsl/Junb/Mapk3	6	GO_BP	up
GO:0060421	positive regulation of heart growth	6/1210	51/28891	0.0192566	0.0859554	0.0630349	Adrb1/Ccnd2/Notch1/Pim1/Pin1/Ddx39b	6	GO_BP	up
GO:0032465	regulation of cytokinesis	9/1210	96/28891	0.0192757	0.0859554	0.0630349	Racgap1/Gipc1/Becn1/Chmp4c/Pin1/Calm3/Sh3glb1/Calm1/Rab11a	9	GO_BP	up
GO:0042490	mechanoreceptor differentiation	9/1210	96/28891	0.0192757	0.0859554	0.0630349	Pls1/Nherf1/Hey1/Jag1/Notch1/Hes1/Sdc4/Rac1/Ift20	9	GO_BP	up
GO:0006364	rRNA processing	16/1210	215/28891	0.0192913	0.0859554	0.0630349	Isg20/Pop7/Brix1/Tsr3/Mrto4/Kat2b/Lyar/Rrs1/Utp11/Rrp1/Gtpbp4/Pa2g4/Fcf1/Imp3/Ebna1bp2/Gtf2h5	16	GO_BP	up
GO:0002237	response to molecule of bacterial origin	27/1210	421/28891	0.0195011	0.0868195	0.0636685	Cxcl1/Cd24a/Spon2/Arid5a/Selenos/Cd274/Cxcl10/Cebpb/Noct/Hmgb2/Trib1/Rara/Nqo1/Zfp36/Paf1/Nfkbia/Chmp5/Cx3cl1/Tcf3/Nfkb1/Prdx2/Pdcd4/Mapk3/Hadhb/Mif/Akirin2/Adh5	27	GO_BP	up
GO:0045444	fat cell differentiation	19/1210	270/28891	0.0196637	0.0874721	0.0641471	Creb5/Nr4a2/Nucb2/Jag1/Cebpb/Adrb1/Six1/Klf5/Noct/Tbl1xr1/Trib2/Hes1/Cebpa/Zfp36/Socs1/Fbxo9/Cds1/Pim1/Tcf7l2	19	GO_BP	up
GO:1903707	negative regulation of hemopoiesis	11/1210	129/28891	0.0198147	0.0880726	0.0645875	Nrarp/Hspb1/Ubash3b/Mdk/Trib1/Rara/Cebpa/Irf1/Socs1/Tsc22d1/Prdx2	11	GO_BP	up
GO:0051147	regulation of muscle cell differentiation	13/1210	163/28891	0.0198968	0.0883122	0.0647632	Rgs4/Prdm6/Adrb1/Ccnd2/Notch1/Gsk3a/Lamb1/Rbm4/Med28/Pdcd4/Pin1/Akirin2/Ddx39b	13	GO_BP	up
GO:0009913	epidermal cell differentiation	18/1210	252/28891	0.0199009	0.0883122	0.0647632	Sfn/Cdkn1a/Irf6/Pls1/Krt5/Nherf1/Grhl1/Hey1/Jag1/Notch1/Hes1/Zfp36/Tsg101/St14/Rac1/Clic4/Mafg/Hdac2	18	GO_BP	up
GO:0036294	cellular response to decreased oxygen levels	12/1210	146/28891	0.0200004	0.0886371	0.0650015	Aqp3/Rgcc/Vldlr/Pick1/Tmbim6/Notch1/Egln2/Cited2/Ubqln1/Nfe2l2/Stub1/P4hb	12	GO_BP	up
GO:0032413	negative regulation of ion transmembrane transporter activity	8/1210	81/28891	0.0200481	0.0886371	0.0650015	Nherf1/Nedd4l/Stk39/Ubqln1/1810037I17Rik/Calm3/Snx27/Calm1	8	GO_BP	up
GO:0072665	protein localization to vacuole	8/1210	81/28891	0.0200481	0.0886371	0.0650015	Clu/Cd81/Atp13a2/Vps36/Becn1/Rraga/Sh3glb1/Lamp2	8	GO_BP	up
GO:0140238	presynaptic endocytosis	8/1210	81/28891	0.0200481	0.0886371	0.0650015	Sncb/Cd24a/Necap1/Cdk5/Actg1/Arf6/Bin1/Ap2s1	8	GO_BP	up
GO:0016051	carbohydrate biosynthetic process	16/1210	216/28891	0.020055	0.0886371	0.0650015	Fbp2/Pgm1/Got1/Mdh2/B4galt1/Zfp692/Slc25a11/Gpd2/Kat2b/Nfkb1/Gapdh/Gfpt1/Atf4/Tcf7l2/Akr1a1/Arpp19	16	GO_BP	up
GO:0001954	positive regulation of cell-matrix adhesion	7/1210	66/28891	0.0202041	0.08908	0.0653263	Fmn1/Cib1/S100a10/Sdc4/Rac1/Gfus/Jup	7	GO_BP	up
GO:0032786	positive regulation of DNA-templated transcription, elongation	7/1210	66/28891	0.0202041	0.08908	0.0653263	Med31/Med30/Med7/Leo1/Med28/Med19/Ddx39b	7	GO_BP	up
GO:0048008	platelet-derived growth factor receptor signaling pathway	7/1210	66/28891	0.0202041	0.08908	0.0653263	Plat/F3/Nherf1/Lrp1/Zfand5/Ift20/Pdap1	7	GO_BP	up
GO:0016358	dendrite development	22/1210	327/28891	0.0203639	0.0894152	0.065572	Fyn/Plk2/Rapgef4/Nedd4l/Pak4/Dynlt1f/Cyth2/Vldlr/Sgk1/Phactr1/Cdk5/Dynlt1c/Gsk3a/Trappc4/Rac1/Slc25a46/Arf6/Hdac2/Arf1/Abi1/Sh3glb1/Septin7	22	GO_BP	up
GO:0046825	regulation of protein export from nucleus	5/1210	38/28891	0.020378	0.0894152	0.065572	Sfn/Cdk5/Chchd4/Gas6/Anp32b	5	GO_BP	up
GO:0051125	regulation of actin nucleation	5/1210	38/28891	0.020378	0.0894152	0.065572	Fmn1/Pick1/Gsn/Rnh1/Arf1	5	GO_BP	up
GO:0098884	postsynaptic neurotransmitter receptor internalization	5/1210	38/28891	0.020378	0.0894152	0.065572	Pick1/Sh3glb2/Ppp3r1/Rala/Ap2s1	5	GO_BP	up
GO:0140239	postsynaptic endocytosis	5/1210	38/28891	0.020378	0.0894152	0.065572	Pick1/Sh3glb2/Ppp3r1/Rala/Ap2s1	5	GO_BP	up
GO:1903901	negative regulation of viral life cycle	5/1210	38/28891	0.020378	0.0894152	0.065572	Gsn/Trim8/Snx3/Csnk2b/Ly6e	5	GO_BP	up
GO:0009410	response to xenobiotic stimulus	23/1210	346/28891	0.0204186	0.0895213	0.0656499	Cyp2f2/Cyp2g1/Cyp2a5/Gsta2/Srd5a1/Gsta4/Alad/Mmp2/Nqo1/Srp68/Rnf149/Gclc/Ss18/Hadh/Tcf3/Atp1a1/Cbr1/Nfe2l2/Crot/Gas6/Ube2b/Gclm/Hadha	23	GO_BP	up
GO:0006470	protein dephosphorylation	17/1210	235/28891	0.0207916	0.091084	0.0667959	Ptpre/Ppp1r16b/Dusp12/Dusp14/Ubash3b/Ppp1r2/Ppp5c/Prkcd/Dusp28/Tiprl/Hsp90b1/Pin1/Ppp3r1/Ptpmt1/Calm3/Calm1/Arpp19	17	GO_BP	up
GO:0030522	intracellular receptor signaling pathway	22/1210	328/28891	0.0209977	0.0915762	0.0671568	Rarb/Aldh1a3/Heyl/Rara/Ufd1/Irf1/Cited2/Fkbp4/Ppp5c/Nfkbia/Stard10/Ubqln1/Wbp2/Calcoco1/Pim1/Tmf1/Flot1/Lacc1/Nr1h2/Uba5/Lamp2/Csnk1a1	22	GO_BP	up
GO:0003197	endocardial cushion development	6/1210	52/28891	0.0210211	0.0915762	0.0671568	Hey1/Jag1/Heyl/Notch1/Cited2/Sox9	6	GO_BP	up
GO:0033013	tetrapyrrole metabolic process	6/1210	52/28891	0.0210211	0.0915762	0.0671568	Cyp2a5/Alas1/Alad/Mmadhc/Snx3/Cpox	6	GO_BP	up
GO:0043268	positive regulation of potassium ion transport	6/1210	52/28891	0.0210211	0.0915762	0.0671568	Cxcl1/Atp1b1/Stk39/Atp1b3/Kif5b/Hbp1	6	GO_BP	up
GO:0043403	skeletal muscle tissue regeneration	6/1210	52/28891	0.0210211	0.0915762	0.0671568	Cd81/Cd9/Klf5/Ifrd1/Akirin1/Nfix	6	GO_BP	up
GO:0044848	biological phase	6/1210	52/28891	0.0210211	0.0915762	0.0671568	Notch1/Ctsl/Ube2b/Nfe2l1/Xrcc5/Nfix	6	GO_BP	up
GO:0060043	regulation of cardiac muscle cell proliferation	6/1210	52/28891	0.0210211	0.0915762	0.0671568	Ccnd2/Notch1/Cited2/Pim1/Hdac2/Vgll4	6	GO_BP	up
GO:0021543	pallium development	14/1210	182/28891	0.0213195	0.0927289	0.0680022	Mdk/Phactr1/Tubb2b/Tuba1a/Cdk5/Btg2/Lamb1/Mdga1/Rac1/Bax/Hdac2/Akirin2/Nfix/Rnf7	14	GO_BP	up
GO:0035148	tube formation	14/1210	182/28891	0.0213195	0.0927289	0.0680022	Irx3/Six1/Rara/Notch1/Lmo4/Cited2/Casp8/Coq7/St14/Vasp/Tmed2/Sdc4/Sox9/Rala	14	GO_BP	up
GO:0003208	cardiac ventricle morphogenesis	8/1210	82/28891	0.0214283	0.0929803	0.0681865	Hey1/Jag1/Heyl/Notch1/Gsk3a/Sox4/Ly6e/Fkbp1a	8	GO_BP	up
GO:0051145	smooth muscle cell differentiation	8/1210	82/28891	0.0214283	0.0929803	0.0681865	Prdm6/Hey1/Six1/Notch1/Hes1/Sox9/Med28/Pdcd4	8	GO_BP	up
GO:0051279	regulation of release of sequestered calcium ion into cytosol	8/1210	82/28891	0.0214283	0.0929803	0.0681865	Tmem38a/Cxcl10/Ubash3b/Cx3cl1/Bax/Calm3/Calm1/Fkbp1a	8	GO_BP	up
GO:0001101	response to acid chemical	16/1210	218/28891	0.0216514	0.0937912	0.0687812	Cdo1/Ces2c/Fyn/Cebpb/Six1/Tmbim6/Mmp2/Nqo1/Tuba1a/Socs1/Krt8/S100a10/Rbx1/Rraga/Lamtor3/Lamtor2	16	GO_BP	up
GO:1901874	negative regulation of post-translational protein modification	9/1210	98/28891	0.0217486	0.0937912	0.0687812	Fyn/Bag5/Cdk5/Gclc/Sox4/Bex3/Ube2b/Gtpbp4/Hmg20b	9	GO_BP	up
GO:0050921	positive regulation of chemotaxis	13/1210	165/28891	0.0217586	0.0937912	0.0687812	Pla2g7/Pgf/Edn2/Hspb1/Cxcl10/Mdk/Stk39/Cx3cl1/Rac1/Akirin1/Mapk3/Gas6/Cttn	13	GO_BP	up
GO:0046503	glycerolipid catabolic process	7/1210	67/28891	0.021773	0.0937912	0.0687812	Ces1d/Pla2g7/Gpcpd1/Pnpla2/Abhd12/Abhd5/Abhd6	7	GO_BP	up
GO:0060119	inner ear receptor cell development	7/1210	67/28891	0.021773	0.0937912	0.0687812	Pls1/Nherf1/Hey1/Hes1/Sdc4/Rac1/Ift20	7	GO_BP	up
GO:0070534	protein K63-linked ubiquitination	7/1210	67/28891	0.021773	0.0937912	0.0687812	Prpf19/Rnf5/Rnf126/Stub1/Ube2b/Ube2n/Ube2v1	7	GO_BP	up
GO:0014812	muscle cell migration	11/1210	131/28891	0.0219393	0.0937912	0.0687812	Plat/F3/Rapgef4/Six1/Lrp1/Mdk/Trib1/Arpc5/Net1/Akirin1/Nfe2l2	11	GO_BP	up
GO:0000413	protein peptidyl-prolyl isomerization	4/1210	26/28891	0.0219406	0.0937912	0.0687812	Ppic/Fkbp4/Pin1/Fkbp1a	4	GO_BP	up
GO:0003181	atrioventricular valve morphogenesis	4/1210	26/28891	0.0219406	0.0937912	0.0687812	Hey1/Heyl/Notch1/Sox4	4	GO_BP	up
GO:0006783	heme biosynthetic process	4/1210	26/28891	0.0219406	0.0937912	0.0687812	Alas1/Alad/Snx3/Cpox	4	GO_BP	up
GO:0019068	virion assembly	4/1210	26/28891	0.0219406	0.0937912	0.0687812	Tsg101/Chmp4c/Chmp1b/Chmp5	4	GO_BP	up
GO:0045736	negative regulation of cyclin-dependent protein serine/threonine kinase activity	4/1210	26/28891	0.0219406	0.0937912	0.0687812	Cdkn1a/Cdkn2c/Kat2b/Cdkn1b	4	GO_BP	up
GO:0046386	deoxyribose phosphate catabolic process	4/1210	26/28891	0.0219406	0.0937912	0.0687812	Urah/Upb1/Dut/Nudt18	4	GO_BP	up
GO:0046782	regulation of viral transcription	4/1210	26/28891	0.0219406	0.0937912	0.0687812	Notch1/Zfp36/Map3k1/Trim8	4	GO_BP	up
GO:0051204	protein insertion into mitochondrial membrane	4/1210	26/28891	0.0219406	0.0937912	0.0687812	Maip1/Tomm40/Bax/Sh3glb1	4	GO_BP	up
GO:0051791	medium-chain fatty acid metabolic process	4/1210	26/28891	0.0219406	0.0937912	0.0687812	Olah/Ces1d/Ces1b/Crot	4	GO_BP	up
GO:0065005	protein-lipid complex assembly	4/1210	26/28891	0.0219406	0.0937912	0.0687812	Ces1d/Bin1/Nr1h2/Arf1	4	GO_BP	up
GO:1903975	regulation of glial cell migration	4/1210	26/28891	0.0219406	0.0937912	0.0687812	Lrp1/Cers2/Cx3cl1/Idh2	4	GO_BP	up
GO:2000561	regulation of CD4-positive, alpha-beta T cell proliferation	4/1210	26/28891	0.0219406	0.0937912	0.0687812	Cd24a/Arg2/Cd81/Cd274	4	GO_BP	up
GO:0071216	cellular response to biotic stimulus	23/1210	349/28891	0.0223098	0.0952954	0.0698842	Cxcl1/Spon2/Arid5a/Selenos/Cd274/Cxcl10/Cebpb/Trib1/Rara/Notch1/Zfp36/Paf1/Nfkbia/Chmp5/Cx3cl1/Nfkb1/Prdx2/Pdcd4/Mapk3/Hadhb/Hspa5/Mif/Zmpste24	23	GO_BP	up
GO:0045637	regulation of myeloid cell differentiation	17/1210	237/28891	0.0223597	0.095434	0.0699859	Jag1/Cebpb/Ripk1/Hmgb2/Ubash3b/Trib1/Rara/Cib1/Zfp36/Paf1/Casp8/Nfkbia/Pithd1/Leo1/Prmt1/Brd1/Smap1	17	GO_BP	up
GO:0033238	regulation of amine metabolic process	5/1210	39/28891	0.0225924	0.0954724	0.0700141	Nr4a2/Aldh2/Pnkd/Comt/Pebp1	5	GO_BP	up
GO:0071402	cellular response to lipoprotein particle stimulus	5/1210	39/28891	0.0225924	0.0954724	0.0700141	Ces1d/Ces1b/Cd81/Cd9/Mylip	5	GO_BP	up
GO:0120033	negative regulation of plasma membrane bounded cell projection assembly	5/1210	39/28891	0.0225924	0.0954724	0.0700141	Arhgap24/Rab3ip/Prkcd/Capzb/Gdi2	5	GO_BP	up
GO:1902003	regulation of amyloid-beta formation	5/1210	39/28891	0.0225924	0.0954724	0.0700141	Clu/Gsk3a/Pin1/Csnk1e/Bin1	5	GO_BP	up
GO:0001886	endothelial cell morphogenesis	3/1210	15/28891	0.0228636	0.0954724	0.0700141	Stc1/Clic4/Col18a1	3	GO_BP	up
GO:0003188	heart valve formation	3/1210	15/28891	0.0228636	0.0954724	0.0700141	Hey1/Notch1/Sox9	3	GO_BP	up
GO:0003198	epithelial to mesenchymal transition involved in endocardial cushion formation	3/1210	15/28891	0.0228636	0.0954724	0.0700141	Hey1/Heyl/Notch1	3	GO_BP	up
GO:0030007	intracellular potassium ion homeostasis	3/1210	15/28891	0.0228636	0.0954724	0.0700141	Atp1b1/Atp1a1/Atp1b3	3	GO_BP	up
GO:0032530	regulation of microvillus organization	3/1210	15/28891	0.0228636	0.0954724	0.0700141	Pls1/Klf5/Ezr	3	GO_BP	up
GO:0036376	sodium ion export across plasma membrane	3/1210	15/28891	0.0228636	0.0954724	0.0700141	Atp1b1/Atp1a1/Atp1b3	3	GO_BP	up
GO:0042541	hemoglobin biosynthetic process	3/1210	15/28891	0.0228636	0.0954724	0.0700141	Alas1/Slc25a37/Snx3	3	GO_BP	up
GO:0043518	negative regulation of DNA damage response, signal transduction by p53 class mediator	3/1210	15/28891	0.0228636	0.0954724	0.0700141	Pcbp4/Pttg1ip/Mif	3	GO_BP	up
GO:0043558	regulation of translational initiation in response to stress	3/1210	15/28891	0.0228636	0.0954724	0.0700141	Dnajc3/Tmed2/Eif2s1	3	GO_BP	up
GO:0045651	positive regulation of macrophage differentiation	3/1210	15/28891	0.0228636	0.0954724	0.0700141	Ripk1/Trib1/Casp8	3	GO_BP	up
GO:0051451	myoblast migration	3/1210	15/28891	0.0228636	0.0954724	0.0700141	Six1/Net1/Akirin1	3	GO_BP	up
GO:0051645	Golgi localization	3/1210	15/28891	0.0228636	0.0954724	0.0700141	Nherf1/Stk25/Copg1	3	GO_BP	up
GO:0052646	alditol phosphate metabolic process	3/1210	15/28891	0.0228636	0.0954724	0.0700141	Gk5/Gpd2/Abhd6	3	GO_BP	up
GO:0060211	regulation of nuclear-transcribed mRNA poly(A) tail shortening	3/1210	15/28891	0.0228636	0.0954724	0.0700141	Zfp36/Polr2g/Btg2	3	GO_BP	up
GO:0070071	proton-transporting two-sector ATPase complex assembly	3/1210	15/28891	0.0228636	0.0954724	0.0700141	Tmem199/Tmem70/Vma21	3	GO_BP	up
GO:0071285	cellular response to lithium ion	3/1210	15/28891	0.0228636	0.0954724	0.0700141	Cebpa/Gsk3a/Cdkn1b	3	GO_BP	up
GO:0097202	activation of cysteine-type endopeptidase activity	3/1210	15/28891	0.0228636	0.0954724	0.0700141	Perp/Casp8/Tbc1d10a	3	GO_BP	up
GO:1901387	positive regulation of voltage-gated calcium channel activity	3/1210	15/28891	0.0228636	0.0954724	0.0700141	Stac/Cdk5/S100a1	3	GO_BP	up
GO:1903543	positive regulation of exosomal secretion	3/1210	15/28891	0.0228636	0.0954724	0.0700141	Atp13a2/Tsg101/Sdc4	3	GO_BP	up
GO:2000650	negative regulation of sodium ion transmembrane transporter activity	3/1210	15/28891	0.0228636	0.0954724	0.0700141	Nherf1/Nedd4l/Stk39	3	GO_BP	up
GO:2001138	regulation of phospholipid transport	3/1210	15/28891	0.0228636	0.0954724	0.0700141	Atp8a2/Prkcd/Tmem30a	3	GO_BP	up
GO:0045471	response to ethanol	8/1210	83/28891	0.0228742	0.0954724	0.0700141	Cdo1/Fyn/Hpgd/Alad/Aldh2/Rara/Casp8/Trp53inp1	8	GO_BP	up
GO:0030850	prostate gland development	6/1210	53/28891	0.0228918	0.0954724	0.0700141	Notch1/Mmp2/Fkbp4/Serpinb5/Sox9/Cdkn1b	6	GO_BP	up
GO:0032968	positive regulation of transcription elongation by RNA polymerase II	6/1210	53/28891	0.0228918	0.0954724	0.0700141	Med31/Med30/Med7/Leo1/Med28/Med19	6	GO_BP	up
GO:0060412	ventricular septum morphogenesis	6/1210	53/28891	0.0228918	0.0954724	0.0700141	Hey1/Heyl/Notch1/Hes1/Cited2/Sox4	6	GO_BP	up
GO:0090207	regulation of triglyceride metabolic process	6/1210	53/28891	0.0228918	0.0954724	0.0700141	Tbl1xr1/Pnpla2/Abhd5/Slc27a1/Nr1h2/Tcf7l2	6	GO_BP	up
GO:0090101	negative regulation of transmembrane receptor protein serine/threonine kinase signaling pathway	12/1210	149/28891	0.023042	0.0960259	0.07042	Cav2/Grem2/Lrp1/Notch1/Ing1/Sinhcaf/Suds3/Pin1/Stub1/Hspa5/Hdac2/Tcf7l2	12	GO_BP	up
GO:0030148	sphingolipid biosynthetic process	9/1210	99/28891	0.0230668	0.0960562	0.0704422	Sgms2/Sptssb/Hacd2/Elovl7/Cers2/Osbp/Prkcd/Elovl6/Vapa	9	GO_BP	up
GO:0071897	DNA biosynthetic process	14/1210	184/28891	0.0231689	0.0964078	0.0707	Nppc/Cdkn1a/Rgcc/Polb/Cct7/Cdkn2d/Pam16/Mapk3/Cct2/Tcp1/Xrcc5/Cct6a/Ddx39b/Cct8	14	GO_BP	up
GO:0031099	regeneration	13/1210	167/28891	0.0237471	0.098739	0.0724096	Cdkn1a/Cd81/Cd9/Cebpb/Klf5/Lrp1/Mdk/Mmp2/Cers2/Ifrd1/Akirin1/Cdkn1b/Nfix	13	GO_BP	up
GO:0006473	protein acetylation	10/1210	116/28891	0.0239261	0.0994075	0.0728999	Nupr1/Arid5a/Kat8/Gtf2b/Sox4/Kat2b/Taf10/Hdac2/Ruvbl1/Morf4l2	10	GO_BP	up
GO:0008203	cholesterol metabolic process	12/1210	150/28891	0.0241278	0.0999057	0.0732652	Ces1d/Ces1b/Hsd17b7/Fgf1/Vldlr/Lrp1/Cebpa/Fdx1/Sqle/Sc5d/Cyb5r3/Nfe2l1	12	GO_BP	up
GO:0031023	microtubule organizing center organization	12/1210	150/28891	0.0241278	0.0999057	0.0732652	Plk2/Ssx2ip/Gadd45a/Tuba1a/Nin/Chmp4c/Chmp1b/Chmp5/Dync1li1/Kat2b/Ranbp1/Nsfl1c	12	GO_BP	up
GO:0034341	response to type II interferon	12/1210	150/28891	0.0241278	0.0999057	0.0732652	Capg/Cdc42ep2/Dapk1/Gsn/Irf1/Cx3cl1/Rab20/Actg1/Gapdh/Kif5b/Stx11/Calm1	12	GO_BP	up
GO:0120161	regulation of cold-induced thermogenesis	12/1210	150/28891	0.0241278	0.0999057	0.0732652	Sfxn5/Cebpb/Adrb1/Arrdc3/Notch1/Ucp2/Elovl6/Hadh/Abhd6/Adipor1/Nr1h2/Atf4	12	GO_BP	up
GO:0045834	positive regulation of lipid metabolic process	14/1210	185/28891	0.0241372	0.0999057	0.0732652	Ces1d/Ces1b/Fgf1/Nucb2/Pnpla2/Prkcd/Abhd5/Kat2b/Mlx/Abhd6/Slc27a1/Nr1h2/Tcf7l2/Sh3glb1	14	GO_BP	up
GO:0045638	negative regulation of myeloid cell differentiation	9/1210	100/28891	0.0244411	0.101087	0.0741318	Ubash3b/Trib1/Rara/Cib1/Zfp36/Paf1/Nfkbia/Leo1/Prmt1	9	GO_BP	up
GO:0009755	hormone-mediated signaling pathway	13/1210	168/28891	0.0247904	0.101533	0.0744588	Rarb/Heyl/Sgk1/Rara/Fkbp4/Ppp5c/Wbp2/Csnk2b/Calcoco1/Tmf1/Adipor1/Slc27a1/Uba5	13	GO_BP	up
GO:0072175	epithelial tube formation	13/1210	168/28891	0.0247904	0.101533	0.0744588	Irx3/Six1/Rara/Lmo4/Cited2/Casp8/Coq7/St14/Vasp/Tmed2/Sdc4/Sox9/Rala	13	GO_BP	up
GO:0003179	heart valve morphogenesis	6/1210	54/28891	0.0248711	0.101533	0.0744588	Hey1/Jag1/Heyl/Notch1/Sox4/Sox9	6	GO_BP	up
GO:0010718	positive regulation of epithelial to mesenchymal transition	6/1210	54/28891	0.0248711	0.101533	0.0744588	Rgcc/Jag1/Mdk/Notch1/Hdac2/Tcf7l2	6	GO_BP	up
GO:0045581	negative regulation of T cell differentiation	6/1210	54/28891	0.0248711	0.101533	0.0744588	Nrarp/Hspb1/Mdk/Irf1/Socs1/Prdx2	6	GO_BP	up
GO:0000289	nuclear-transcribed mRNA poly(A) tail shortening	4/1210	27/28891	0.024925	0.101533	0.0744588	Zfp36/Polr2g/Btg2/Cnot6	4	GO_BP	up
GO:0006376	mRNA splice site recognition	4/1210	27/28891	0.024925	0.101533	0.0744588	Celf4/Srsf10/Puf60/Snrpc	4	GO_BP	up
GO:0006883	intracellular sodium ion homeostasis	4/1210	27/28891	0.024925	0.101533	0.0744588	Atp1b1/Sgk1/Atp1a1/Atp1b3	4	GO_BP	up
GO:0010954	positive regulation of protein processing	4/1210	27/28891	0.024925	0.101533	0.0744588	Timm17a/Gsn/S100a10/Plgrkt	4	GO_BP	up
GO:0016486	peptide hormone processing	4/1210	27/28891	0.024925	0.101533	0.0744588	Ece1/Pcsk6/Hsp90b1/P4hb	4	GO_BP	up
GO:0022403	cell cycle phase	4/1210	27/28891	0.024925	0.101533	0.0744588	Ube2b/Nfe2l1/Xrcc5/Nfix	4	GO_BP	up
GO:0031639	plasminogen activation	4/1210	27/28891	0.024925	0.101533	0.0744588	Plat/Serpine2/S100a10/Plgrkt	4	GO_BP	up
GO:0032528	microvillus organization	4/1210	27/28891	0.024925	0.101533	0.0744588	Pls1/Nherf1/Klf5/Ezr	4	GO_BP	up
GO:0035739	CD4-positive, alpha-beta T cell proliferation	4/1210	27/28891	0.024925	0.101533	0.0744588	Cd24a/Arg2/Cd81/Cd274	4	GO_BP	up
GO:0060716	labyrinthine layer blood vessel development	4/1210	27/28891	0.024925	0.101533	0.0744588	Hey1/Hes1/Tmed2/Junb	4	GO_BP	up
GO:0097396	response to interleukin-17	4/1210	27/28891	0.024925	0.101533	0.0744588	Cxcl1/Cxcl10/Notch1/Nfkb1	4	GO_BP	up
GO:1904030	negative regulation of cyclin-dependent protein kinase activity	4/1210	27/28891	0.024925	0.101533	0.0744588	Cdkn1a/Cdkn2c/Kat2b/Cdkn1b	4	GO_BP	up
GO:0010664	negative regulation of striated muscle cell apoptotic process	5/1210	40/28891	0.0249569	0.101533	0.0744588	Nupr1/Acot1/Mdk/Nfe2l2/Pcmt1	5	GO_BP	up
GO:0021799	cerebral cortex radially oriented cell migration	5/1210	40/28891	0.0249569	0.101533	0.0744588	Cdk5/Lamb1/Mdga1/Rac1/Rnf7	5	GO_BP	up
GO:0048665	neuron fate specification	5/1210	40/28891	0.0249569	0.101533	0.0744588	Isl2/Six1/Lmo4/Sox9/Nfix	5	GO_BP	up
GO:0051693	actin filament capping	5/1210	40/28891	0.0249569	0.101533	0.0744588	Capg/Gsn/Twf1/Capzb/Mtpn	5	GO_BP	up
GO:1905314	semi-lunar valve development	5/1210	40/28891	0.0249569	0.101533	0.0744588	Hey1/Jag1/Heyl/Notch1/Sox9	5	GO_BP	up
GO:0051148	negative regulation of muscle cell differentiation	7/1210	69/28891	0.0251598	0.102207	0.0749529	Rgs4/Prdm6/Ccnd2/Notch1/Gsk3a/Med28/Pdcd4	7	GO_BP	up
GO:1903556	negative regulation of tumor necrosis factor superfamily cytokine production	7/1210	69/28891	0.0251598	0.102207	0.0749529	Cd24a/Arg2/Selenos/Cd274/Rara/Cx3cl1/Gas6	7	GO_BP	up
GO:0035725	sodium ion transmembrane transport	13/1210	169/28891	0.0258671	0.104869	0.0769053	Kcnk1/Atp1b1/Prss8/Nherf1/Nedd4l/Pick1/Fxyd3/Scn1b/Stk39/Atp1a1/Atp1b3/Kif5b/Arf1	13	GO_BP	up
GO:0043433	negative regulation of DNA-binding transcription factor activity	13/1210	169/28891	0.0258671	0.104869	0.0769053	Foxs1/Nupr1/Heyl/Trib2/Trib1/Hes1/Rnf2/Nfkbia/Cebpg/Prdx2/Pim1/Hdac2/Tcf7l2	13	GO_BP	up
GO:0070252	actin-mediated cell contraction	9/1210	101/28891	0.0258726	0.104869	0.0769053	Stc1/Nedd4l/Adrb1/Gsn/Scn1b/Atp1a1/Dsc2/Bin1/Jup	9	GO_BP	up
GO:2000736	regulation of stem cell differentiation	8/1210	85/28891	0.0259695	0.105184	0.077136	Jag1/Notch1/Hes1/Zfp36/Sox9/Ociad1/Nfe2l2/Hdac2	8	GO_BP	up
GO:0002696	positive regulation of leukocyte activation	27/1210	432/28891	0.0260194	0.105308	0.0772273	Il33/Cd24a/Nppc/Cdkn1a/Bmi1/Cd81/Nectin2/Cd274/Sh3kbp1/H2-DMb1/Mdk/Dhps/Rara/Hes1/Cebpa/Irf1/Socs1/Ppp2r3c/Sox4/Tcf3/Il7/Smarcd2/Gas6/Mif/Hspd1/Akirin2/Selenok	27	GO_BP	up
GO:0016331	morphogenesis of embryonic epithelium	14/1210	187/28891	0.0261638	0.105815	0.0775984	Irx3/Aldh1a3/Six1/Rara/Lmo4/Cited2/Casp8/Coq7/St14/Vasp/Tmed2/Sdc4/Sox9/Rala	14	GO_BP	up
GO:0051348	negative regulation of transferase activity	18/1210	260/28891	0.0262094	0.105921	0.0776764	Cdkn1a/Hspb1/Cdkn2c/Ubash3b/Trib1/Gadd45b/Bag5/Zfp36/Gadd45a/Akt1s1/Prkcd/Tsg101/Gsk3a/Dnajc3/Kat2b/Prkar1a/Cdkn1b/Pik3ip1	18	GO_BP	up
GO:0120034	positive regulation of plasma membrane bounded cell projection assembly	10/1210	118/28891	0.0265584	0.107252	0.0786526	Gm14137/Cdc42ep2/Hras/Rac1/Akirin1/Rala/Mien1/Ift20/Dynll1/Septin7	10	GO_BP	up
GO:0001822	kidney development	22/1210	336/28891	0.026634	0.107478	0.0788184	Irx3/Rarb/Cd24a/Arg2/Pgf/Aqp11/Fgf1/Hey1/Jag1/Six1/Heyl/Fmn1/Rara/Notch1/Hes1/Lzts2/Sox4/Sox9/Bax/Epcam/Zmpste24/Ift20	22	GO_BP	up
GO:0061462	protein localization to lysosome	6/1210	55/28891	0.0269613	0.108177	0.0793312	Clu/Cd81/Atp13a2/Becn1/Rraga/Lamp2	6	GO_BP	up
GO:0089718	amino acid import across plasma membrane	6/1210	55/28891	0.0269613	0.108177	0.0793312	Rgs4/Arg2/Slc1a4/Prkcd/Slc3a2/Arl6ip5	6	GO_BP	up
GO:1903350	response to dopamine	6/1210	55/28891	0.0269613	0.108177	0.0793312	Cav2/Gnao1/Rgs4/Rgs9/Nherf1/Gna11	6	GO_BP	up
GO:1903351	cellular response to dopamine	6/1210	55/28891	0.0269613	0.108177	0.0793312	Cav2/Gnao1/Rgs4/Rgs9/Nherf1/Gna11	6	GO_BP	up
GO:2000378	negative regulation of reactive oxygen species metabolic process	6/1210	55/28891	0.0269613	0.108177	0.0793312	Fyn/Becn1/Vdac1/Ndufc2/Hbp1/Hspd1	6	GO_BP	up
GO:0035315	hair cell differentiation	7/1210	70/28891	0.0269813	0.108177	0.0793312	Pls1/Nherf1/Hey1/Jag1/Notch1/Hes1/Rac1	7	GO_BP	up
GO:0034655	nucleobase-containing compound catabolic process	26/1210	414/28891	0.0270857	0.108177	0.0793312	Dera/Urah/Carhsp1/Upb1/Isg20/Dnase2a/Noct/Rnaseh2a/Zfp36/Polr2g/Btg2/Pelo/Dut/Pcbp4/Eloc/Nudt3/Ttc5/Mrto4/Trir/Nudt18/Pnrc1/Bax/Cnot6/Rbm7/Lsm1/Rbm47	26	GO_BP	up
GO:0032872	regulation of stress-activated MAPK cascade	15/1210	206/28891	0.0272184	0.108177	0.0793312	Hras/Ripk1/Gsn/Gadd45b/Gadd45a/Rell1/Map3k1/Stk39/Ezr/Ltbr/Arl6ip5/Prmt1/Stk25/Mapk3/Prdx1	15	GO_BP	up
GO:1903531	negative regulation of secretion by cell	14/1210	188/28891	0.027223	0.108177	0.0793312	Kcnj6/Gnao1/Edn2/Pim3/Nucb2/Notch1/Ucp2/Hadh/Frmd4a/Idh2/Pnkd/Ptpmt1/Anxa5/Eny2	14	GO_BP	up
GO:0009070	serine family amino acid biosynthetic process	3/1210	16/28891	0.0272814	0.108177	0.0793312	Psph/Sephs2/Psat1	3	GO_BP	up
GO:0010226	response to lithium ion	3/1210	16/28891	0.0272814	0.108177	0.0793312	Cebpa/Gsk3a/Cdkn1b	3	GO_BP	up
GO:0010887	negative regulation of cholesterol storage	3/1210	16/28891	0.0272814	0.108177	0.0793312	Ces1d/Ces1b/Nr1h2	3	GO_BP	up
GO:0014857	regulation of skeletal muscle cell proliferation	3/1210	16/28891	0.0272814	0.108177	0.0793312	Cav2/Six1/Akirin1	3	GO_BP	up
GO:0021681	cerebellar granular layer development	3/1210	16/28891	0.0272814	0.108177	0.0793312	Serpine2/Mdk/Nfix	3	GO_BP	up
GO:0032048	cardiolipin metabolic process	3/1210	16/28891	0.0272814	0.108177	0.0793312	Slc27a1/Ptpmt1/Hadha	3	GO_BP	up
GO:0043951	negative regulation of cAMP-mediated signaling	3/1210	16/28891	0.0272814	0.108177	0.0793312	Nucb2/Cdc34/Ube2b	3	GO_BP	up
GO:0051151	negative regulation of smooth muscle cell differentiation	3/1210	16/28891	0.0272814	0.108177	0.0793312	Prdm6/Med28/Pdcd4	3	GO_BP	up
GO:0060546	negative regulation of necroptotic process	3/1210	16/28891	0.0272814	0.108177	0.0793312	Ripk1/Casp8/Ybx3	3	GO_BP	up
GO:0061101	neuroendocrine cell differentiation	3/1210	16/28891	0.0272814	0.108177	0.0793312	Jag1/Notch1/Hes1	3	GO_BP	up
GO:0061952	midbody abscission	3/1210	16/28891	0.0272814	0.108177	0.0793312	Chmp4c/Chmp1b/Chmp5	3	GO_BP	up
GO:0070278	extracellular matrix constituent secretion	3/1210	16/28891	0.0272814	0.108177	0.0793312	Rgcc/Notch1/Ier3ip1	3	GO_BP	up
GO:0110156	methylguanosine-cap decapping	3/1210	16/28891	0.0272814	0.108177	0.0793312	Noct/Zfp36/Lsm1	3	GO_BP	up
GO:1902306	negative regulation of sodium ion transmembrane transport	3/1210	16/28891	0.0272814	0.108177	0.0793312	Nherf1/Nedd4l/Stk39	3	GO_BP	up
GO:1905906	regulation of amyloid fibril formation	3/1210	16/28891	0.0272814	0.108177	0.0793312	Clu/Pfdn4/Pfdn2	3	GO_BP	up
GO:0019935	cyclic-nucleotide-mediated signaling	9/1210	102/28891	0.0273624	0.108393	0.0794891	Ece1/Nppc/Nucb2/Cap1/Sox9/Gapdh/Cdc34/Ube2b/Pebp1	9	GO_BP	up
GO:0045823	positive regulation of heart contraction	5/1210	41/28891	0.0274743	0.108393	0.0794891	Rgs4/Edn2/Adrb1/Gsk3a/Atp1a1	5	GO_BP	up
GO:0046461	neutral lipid catabolic process	5/1210	41/28891	0.0274743	0.108393	0.0794891	Ces1d/Pnpla2/Abhd12/Abhd5/Abhd6	5	GO_BP	up
GO:0046464	acylglycerol catabolic process	5/1210	41/28891	0.0274743	0.108393	0.0794891	Ces1d/Pnpla2/Abhd12/Abhd5/Abhd6	5	GO_BP	up
GO:0070849	response to epidermal growth factor	5/1210	41/28891	0.0274743	0.108393	0.0794891	Grk2/Garem1/Zfp36/Sox9/Mapk3	5	GO_BP	up
GO:1900026	positive regulation of substrate adhesion-dependent cell spreading	5/1210	41/28891	0.0274743	0.108393	0.0794891	Mdk/Cib1/S100a10/Rac1/P4hb	5	GO_BP	up
GO:1903573	negative regulation of response to endoplasmic reticulum stress	5/1210	41/28891	0.0274743	0.108393	0.0794891	Clu/Aqp11/Selenos/Tmbim6/Nr1h2	5	GO_BP	up
GO:0003231	cardiac ventricle development	12/1210	153/28891	0.0276104	0.108851	0.0798255	Hey1/Jag1/Heyl/Notch1/Lmo4/Hes1/Cited2/Gsk3a/Sox4/Zmpste24/Ly6e/Fkbp1a	12	GO_BP	up
GO:0006817	phosphate ion transport	4/1210	28/28891	0.0281421	0.110471	0.0810128	Stc2/Cebpb/Slc25a11/Atf4	4	GO_BP	up
GO:0015740	C4-dicarboxylate transport	4/1210	28/28891	0.0281421	0.110471	0.0810128	Slc1a4/Ucp2/Prkcd/Slc25a11	4	GO_BP	up
GO:0045648	positive regulation of erythrocyte differentiation	4/1210	28/28891	0.0281421	0.110471	0.0810128	Hmgb2/Prmt1/Brd1/Smap1	4	GO_BP	up
GO:0060713	labyrinthine layer morphogenesis	4/1210	28/28891	0.0281421	0.110471	0.0810128	St14/Tmed2/Dnajb6/Grb2	4	GO_BP	up
GO:0062098	regulation of programmed necrotic cell death	4/1210	28/28891	0.0281421	0.110471	0.0810128	Nupr1/Ripk1/Casp8/Ybx3	4	GO_BP	up
GO:1903902	positive regulation of viral life cycle	4/1210	28/28891	0.0281421	0.110471	0.0810128	Tmprss2/Tsg101/Bsg/P4hb	4	GO_BP	up
GO:0033044	regulation of chromosome organization	17/1210	244/28891	0.0285613	0.112036	0.0821605	Cct7/Sub1/H3f3b/Becn1/Zwint/Dync1li1/Kat2b/Smc4/Smarcd2/H3f3a/Mapk3/Cct2/Tcp1/Xrcc5/Ruvbl1/Cct6a/Cct8	17	GO_BP	up
GO:0021695	cerebellar cortex development	7/1210	71/28891	0.0288904	0.113083	0.082929	Serpine2/Mdk/Tuba1a/Cdk5/Slc25a46/Hspa5/Nfix	7	GO_BP	up
GO:0032371	regulation of sterol transport	7/1210	71/28891	0.0288904	0.113083	0.082929	Ces1d/Ces1b/Lrp1/Nfkbia/Osbpl6/Nr1h2/Pltp	7	GO_BP	up
GO:0032374	regulation of cholesterol transport	7/1210	71/28891	0.0288904	0.113083	0.082929	Ces1d/Ces1b/Lrp1/Nfkbia/Osbpl6/Nr1h2/Pltp	7	GO_BP	up
GO:0045921	positive regulation of exocytosis	9/1210	103/28891	0.0289116	0.113085	0.0829305	Rab3a/Nppc/Atp13a2/Cdk5/Tsg101/Rab15/S100a10/Sdc4/Arf1	9	GO_BP	up
GO:0042531	positive regulation of tyrosine phosphorylation of STAT protein	6/1210	56/28891	0.0291646	0.113912	0.0835369	Tnfrsf18/Fyn/Hes1/Osbp/Ctf1/Hdac2	6	GO_BP	up
GO:0046605	regulation of centrosome cycle	6/1210	56/28891	0.0291646	0.113912	0.0835369	Plk2/Chmp4c/Chmp1b/Chmp5/Dync1li1/Kat2b	6	GO_BP	up
GO:0007259	receptor signaling pathway via JAK-STAT	15/1210	208/28891	0.0293197	0.114372	0.0838737	Tnfrsf18/Fyn/Notch1/Hes1/Gadd45a/Osbp/Irf1/Cdk5/Socs1/Rac1/Ctf1/Adipor1/Hdac2/Crlf3/Calm1	15	GO_BP	up
GO:0048041	focal adhesion assembly	8/1210	87/28891	0.0293448	0.114372	0.0838737	Fam107a/Fmn1/Lrp1/S100a10/Sdc4/Rac1/Actg1/Cttn	8	GO_BP	up
GO:0097120	receptor localization to synapse	8/1210	87/28891	0.0293448	0.114372	0.0838737	Gpc6/Rapgef4/Hras/Shisa6/Stx7/Kif5b/Snap47/Rab11a	8	GO_BP	up
GO:0043588	skin development	22/1210	340/28891	0.0298525	0.116267	0.085264	Sfn/Cdkn1a/Irf6/Krt5/Prss8/Grhl1/Foxq1/Atp8a2/Arrdc3/Notch1/Zfp36/Lsr/Tsg101/St14/Sox9/Ctsl/Clic4/Slc39a7/Zmpste24/Hdac2/Tcf7l2/Jup	22	GO_BP	up
GO:0071425	hematopoietic stem cell proliferation	5/1210	42/28891	0.0301473	0.117166	0.0859228	Cxcl1/Cebpa/Tsc22d1/Pim1/Xrcc5	5	GO_BP	up
GO:0071827	plasma lipoprotein particle organization	5/1210	42/28891	0.0301473	0.117166	0.0859228	Ces1d/Pla2g7/Nr1h2/Pltp/Arf1	5	GO_BP	up
GO:1901532	regulation of hematopoietic progenitor cell differentiation	5/1210	42/28891	0.0301473	0.117166	0.0859228	Rara/Notch1/Hes1/Zfp36/Nfe2l2	5	GO_BP	up
GO:0030856	regulation of epithelial cell differentiation	13/1210	173/28891	0.0305194	0.11845	0.0868648	Cd24a/Sfn/Grhl1/Hey1/Jag1/Cebpb/Notch1/Hes1/Zfp36/Sox9/Mafg/Cdkn1b/Nfe2l1	13	GO_BP	up
GO:0140029	exocytic process	9/1210	104/28891	0.0305211	0.11845	0.0868648	Gnao1/Rab3a/Rab13/Napa/Exoc7/Snapin/Stx11/Snap47/Ralb	9	GO_BP	up
GO:0007266	Rho protein signal transduction	11/1210	138/28891	0.0306947	0.11904	0.087297	Gm14137/Rhov/Kctd13/Cdc42ep2/Rhou/Adrb1/Racgap1/Rtkn/Net1/Flot1/Nfix	11	GO_BP	up
GO:0060840	artery development	10/1210	121/28891	0.0308854	0.119622	0.0877244	Hpgd/Hey1/Jag1/Six1/Lrp1/Mdk/Notch1/Hes1/Cited2/Sox4	10	GO_BP	up
GO:0031638	zymogen activation	7/1210	72/28891	0.0308886	0.119622	0.0877244	Plat/Serpine2/Perp/Casp8/Tbc1d10a/S100a10/Plgrkt	7	GO_BP	up
GO:0046323	glucose import	8/1210	88/28891	0.0311407	0.120513	0.0883778	Ocln/Grk2/Capn10/Rab4b/Prkcd/Gsk3a/Nfe2l2/Slc27a1	8	GO_BP	up
GO:0008584	male gonad development	12/1210	156/28891	0.0314442	0.120904	0.088664	Nupr1/Rab13/Hmgb2/Rara/Cited2/H3f3b/Adrm1/Eif2s2/Ybx3/Sox9/Tmf1/Bax	12	GO_BP	up
GO:1903900	regulation of viral life cycle	12/1210	156/28891	0.0314442	0.120904	0.088664	Tmprss2/Nectin2/Isg20/Gsn/Notch1/Tsg101/Trim8/Snx3/Csnk2b/Bsg/P4hb/Ly6e	12	GO_BP	up
GO:0009395	phospholipid catabolic process	6/1210	57/28891	0.0314828	0.120904	0.088664	Pla2g7/Idh1/Gpcpd1/Prkcd/Abhd12/Abhd6	6	GO_BP	up
GO:0010883	regulation of lipid storage	6/1210	57/28891	0.0314828	0.120904	0.088664	Ces1d/Ces1b/Pnpla2/Nfkbia/Abhd5/Nr1h2	6	GO_BP	up
GO:0050435	amyloid-beta metabolic process	6/1210	57/28891	0.0314828	0.120904	0.088664	Clu/Becn1/Gsk3a/Pin1/Csnk1e/Bin1	6	GO_BP	up
GO:0070527	platelet aggregation	6/1210	57/28891	0.0314828	0.120904	0.088664	Serpine2/Cd9/Ubash3b/Bloc1s4/Prkcd/Pdia4	6	GO_BP	up
GO:0030307	positive regulation of cell growth	15/1210	210/28891	0.0315382	0.120904	0.088664	Crabp2/Sfn/Nedd4l/Tnfrsf12a/Adrb1/Sgk1/Lrp1/Cib1/Gdi1/Zfp639/Pin1/Eif2b2/Sh3glb1/Mtpn/Ddx39b	15	GO_BP	up
GO:0051048	negative regulation of secretion	15/1210	210/28891	0.0315382	0.120904	0.088664	Kcnj6/Gnao1/Edn2/Pim3/Nucb2/Notch1/Ucp2/Stk39/Hadh/Frmd4a/Idh2/Pnkd/Ptpmt1/Anxa5/Eny2	15	GO_BP	up
GO:0051560	mitochondrial calcium ion homeostasis	4/1210	29/28891	0.0315948	0.120904	0.088664	Maip1/1600014C10Rik/Bcap31/Fis1	4	GO_BP	up
GO:0051767	nitric-oxide synthase biosynthetic process	4/1210	29/28891	0.0315948	0.120904	0.088664	Il33/Selenos/Akap12/Fnta	4	GO_BP	up
GO:0051769	regulation of nitric-oxide synthase biosynthetic process	4/1210	29/28891	0.0315948	0.120904	0.088664	Il33/Selenos/Akap12/Fnta	4	GO_BP	up
GO:0060008	Sertoli cell differentiation	4/1210	29/28891	0.0315948	0.120904	0.088664	Rab13/Rara/Adrm1/Sox9	4	GO_BP	up
GO:0071474	cellular hyperosmotic response	4/1210	29/28891	0.0315948	0.120904	0.088664	Efhd1/Stk39/Ybx3/Xrcc5	4	GO_BP	up
GO:0086005	ventricular cardiac muscle cell action potential	4/1210	29/28891	0.0315948	0.120904	0.088664	Nedd4l/Dsc2/Bin1/Jup	4	GO_BP	up
GO:0090151	establishment of protein localization to mitochondrial membrane	4/1210	29/28891	0.0315948	0.120904	0.088664	Maip1/Tomm40/Bax/Sh3glb1	4	GO_BP	up
GO:1904385	cellular response to angiotensin	4/1210	29/28891	0.0315948	0.120904	0.088664	Prkcd/Rac1/Nfkb1/Nfe2l2	4	GO_BP	up
GO:0051250	negative regulation of lymphocyte activation	13/1210	174/28891	0.0317716	0.121064	0.0887814	Dapl1/Cd24a/Arg2/Nrarp/Hspb1/Cd274/Cebpb/Mdk/Irf1/Socs1/Sdc4/Prkar1a/Prdx2	13	GO_BP	up
GO:0045861	negative regulation of proteolysis	23/1210	362/28891	0.032112	0.121064	0.0887814	Plat/Sfn/Grk2/Aqp11/Serpine2/Alad/Gipc1/Bag5/Cdkn2d/Serpinb5/Cdk5/Psme3ip1/Pdcl3/Gabarapl2/Cstb/Gapdh/Dnajb6/Timp2/Gas6/Bin1/Nr1h2/Pebp1/Hsp90ab1	23	GO_BP	up
GO:0006337	nucleosome disassembly	3/1210	17/28891	0.0321193	0.121064	0.0887814	H2ac25/Cebpg/Smarcd2	3	GO_BP	up
GO:0006878	intracellular copper ion homeostasis	3/1210	17/28891	0.0321193	0.121064	0.0887814	Cox19/Atox1/Arf1	3	GO_BP	up
GO:0032328	alanine transport	3/1210	17/28891	0.0321193	0.121064	0.0887814	Slc1a4/Slc3a2/Sfxn1	3	GO_BP	up
GO:0032510	endosome to lysosome transport via multivesicular body sorting pathway	3/1210	17/28891	0.0321193	0.121064	0.0887814	Chmp4c/Chmp1b/Chmp5	3	GO_BP	up
GO:0040015	negative regulation of multicellular organism growth	3/1210	17/28891	0.0321193	0.121064	0.0887814	Gdf15/Stc2/Adrb1	3	GO_BP	up
GO:0055070	copper ion homeostasis	3/1210	17/28891	0.0321193	0.121064	0.0887814	Cox19/Atox1/Arf1	3	GO_BP	up
GO:0060044	negative regulation of cardiac muscle cell proliferation	3/1210	17/28891	0.0321193	0.121064	0.0887814	Cited2/Hdac2/Vgll4	3	GO_BP	up
GO:0060148	positive regulation of post-transcriptional gene silencing	3/1210	17/28891	0.0321193	0.121064	0.0887814	Ripk1/Zfp36/Nfkb1	3	GO_BP	up
GO:0072350	tricarboxylic acid metabolic process	3/1210	17/28891	0.0321193	0.121064	0.0887814	Idh1/Aco2/Idh2	3	GO_BP	up
GO:0097050	type B pancreatic cell apoptotic process	3/1210	17/28891	0.0321193	0.121064	0.0887814	Capn10/Tcf7l2/Eif2s1	3	GO_BP	up
GO:0097428	protein maturation by iron-sulfur cluster transfer	3/1210	17/28891	0.0321193	0.121064	0.0887814	Ciao2b/Glrx3/Isca2	3	GO_BP	up
GO:0098761	cellular response to interleukin-7	3/1210	17/28891	0.0321193	0.121064	0.0887814	Gipc1/P4hb/Hspd1	3	GO_BP	up
GO:1900370	positive regulation of post-transcriptional gene silencing by RNA	3/1210	17/28891	0.0321193	0.121064	0.0887814	Ripk1/Zfp36/Nfkb1	3	GO_BP	up
GO:1901201	regulation of extracellular matrix assembly	3/1210	17/28891	0.0321193	0.121064	0.0887814	Rgcc/Notch1/Sox9	3	GO_BP	up
GO:1903541	regulation of exosomal secretion	3/1210	17/28891	0.0321193	0.121064	0.0887814	Atp13a2/Tsg101/Sdc4	3	GO_BP	up
GO:1903798	regulation of miRNA processing	3/1210	17/28891	0.0321193	0.121064	0.0887814	Bcdin3d/Ripk1/Zmpste24	3	GO_BP	up
GO:1905288	vascular associated smooth muscle cell apoptotic process	3/1210	17/28891	0.0321193	0.121064	0.0887814	Gapdh/Pdcd4/Atf4	3	GO_BP	up
GO:1905459	regulation of vascular associated smooth muscle cell apoptotic process	3/1210	17/28891	0.0321193	0.121064	0.0887814	Gapdh/Pdcd4/Atf4	3	GO_BP	up
GO:2000637	positive regulation of miRNA-mediated gene silencing	3/1210	17/28891	0.0321193	0.121064	0.0887814	Ripk1/Zfp36/Nfkb1	3	GO_BP	up
GO:0032874	positive regulation of stress-activated MAPK cascade	11/1210	139/28891	0.032123	0.121064	0.0887814	Hras/Ripk1/Gsn/Gadd45b/Gadd45a/Rell1/Map3k1/Stk39/Ltbr/Arl6ip5/Stk25	11	GO_BP	up
GO:0008585	female gonad development	10/1210	122/28891	0.032432	0.122144	0.0895737	Nppc/Edn2/Grk2/Nupr1/Cebpb/Mmp2/Adrm1/Rac1/Eif2b2/Bax	10	GO_BP	up
GO:0007517	muscle organ development	24/1210	382/28891	0.032546	0.122489	0.0898267	Cav2/Nupr1/Hey1/Six1/Klf5/Heyl/Notch1/Gpcpd1/Unc45a/Cited2/Serp1/Cdk5/Btg2/Ybx3/Akirin1/Cd164/Psma6/Flot1/Nras/Tcf7l2/Hmg20b/Nfix/Ly6e/Fkbp1a	24	GO_BP	up
GO:0046546	development of primary male sexual characteristics	12/1210	157/28891	0.032803	0.123185	0.090337	Nupr1/Rab13/Hmgb2/Rara/Cited2/H3f3b/Adrm1/Eif2s2/Ybx3/Sox9/Tmf1/Bax	12	GO_BP	up
GO:0030239	myofibril assembly	7/1210	73/28891	0.0329776	0.123185	0.090337	Krt19/Nebl/Neurl2/Krt8/Prkar1a/Actg1/Hdac2	7	GO_BP	up
GO:0030888	regulation of B cell proliferation	7/1210	73/28891	0.0329776	0.123185	0.090337	Cd24a/Cdkn1a/Bmi1/Cd81/Tcf3/Il7/Mif	7	GO_BP	up
GO:1903317	regulation of protein maturation	7/1210	73/28891	0.0329776	0.123185	0.090337	Plat/Serpine2/Timm17a/Gsn/S100a10/Sox4/Plgrkt	7	GO_BP	up
GO:0006778	porphyrin-containing compound metabolic process	5/1210	43/28891	0.0329783	0.123185	0.090337	Cyp2a5/Alas1/Alad/Snx3/Cpox	5	GO_BP	up
GO:0035307	positive regulation of protein dephosphorylation	5/1210	43/28891	0.0329783	0.123185	0.090337	Ppp1r16b/Prkcd/Pin1/Calm3/Calm1	5	GO_BP	up
GO:0043277	apoptotic cell clearance	5/1210	43/28891	0.0329783	0.123185	0.090337	Lrp1/Rara/Becn1/Rac1/Gas6	5	GO_BP	up
GO:0050685	positive regulation of mRNA processing	5/1210	43/28891	0.0329783	0.123185	0.090337	Celf4/Prpf19/Paf1/Leo1/Clns1a	5	GO_BP	up
GO:0051281	positive regulation of release of sequestered calcium ion into cytosol	5/1210	43/28891	0.0329783	0.123185	0.090337	Cxcl10/Cx3cl1/Bax/Calm3/Calm1	5	GO_BP	up
GO:0086002	cardiac muscle cell action potential involved in contraction	5/1210	43/28891	0.0329783	0.123185	0.090337	Nedd4l/Scn1b/Dsc2/Bin1/Jup	5	GO_BP	up
GO:1901385	regulation of voltage-gated calcium channel activity	5/1210	43/28891	0.0329783	0.123185	0.090337	Stac/Cdk5/S100a1/Calm3/Calm1	5	GO_BP	up
GO:0032410	negative regulation of transporter activity	8/1210	89/28891	0.0330104	0.123221	0.0903632	Nherf1/Nedd4l/Stk39/Ubqln1/1810037I17Rik/Calm3/Snx27/Calm1	8	GO_BP	up
GO:0007596	blood coagulation	13/1210	175/28891	0.0330605	0.123324	0.0904386	Plat/F3/Serpine2/Cd9/Ubash3b/Bloc1s4/Prkcd/Pdia4/C1galt1c1/Prdx2/Nfe2l2/Gas6/Anxa5	13	GO_BP	up
GO:0046651	lymphocyte proliferation	24/1210	383/28891	0.0334006	0.124424	0.0912453	Cd24a/Arg2/Cdkn1a/Fyn/Bmi1/Cd81/Cd274/Cebpb/H2-DMb1/Dhps/Hes1/Irf1/Prkcd/Sdc4/Tcf3/Il7/Prkar1a/Prdx2/Cd151/Bax/Mif/Hspd1/Fkbp1a/Selenok	24	GO_BP	up
GO:0006935	chemotaxis	28/1210	462/28891	0.0334008	0.124424	0.0912453	Cxcl1/Pla2g7/Pgf/Edn2/Cmtm8/Hspb1/Fgf1/Cxcl10/Rab13/Sema3f/Hmgb2/Lrp1/Mdk/Notch1/Mmp2/Tubb2b/Prkcd/Stk39/Cx3cl1/Rac1/Akirin1/Plgrkt/Bsg/Mapk3/Gas6/Mif/Cmtm7/Cttn	28	GO_BP	up
GO:0002685	regulation of leukocyte migration	17/1210	249/28891	0.0337189	0.125523	0.0920516	Il33/Tnfrsf18/Pla2g7/Pgf/Edn2/Cd81/Cd9/Cxcl10/Mdk/Stk39/Cx3cl1/Rac1/Akirin1/Mapk3/Gas6/Mif/Selenok	17	GO_BP	up
GO:0021587	cerebellum morphogenesis	6/1210	58/28891	0.0339178	0.126178	0.0925318	Serpine2/Tuba1a/Cdk5/Slc25a46/Hspa5/Nfix	6	GO_BP	up
GO:0032963	collagen metabolic process	10/1210	123/28891	0.0340322	0.126346	0.092655	Nppc/Rgcc/Got1/Cygb/Notch1/Mmp2/Prkcd/Ctsl/Prdx5/Suco	10	GO_BP	up
GO:0038127	ERBB signaling pathway	10/1210	123/28891	0.0340322	0.126346	0.092655	Hras/Garem1/Tsg101/Rnf126/Sox9/Mapk3/Snx5/Rala/Ralb/Grb2	10	GO_BP	up
GO:0042100	B cell proliferation	10/1210	123/28891	0.0340322	0.126346	0.092655	Cd24a/Cdkn1a/Bmi1/Cd81/Prkcd/Tcf3/Il7/Bax/Mif/Hspd1	10	GO_BP	up
GO:0043543	protein acylation	12/1210	158/28891	0.0342033	0.126895	0.0930579	Nupr1/Arid5a/Kat8/Gtf2b/Sox4/Kat2b/Glul/Taf10/Hdac2/Ruvbl1/Morf4l2/Selenok	12	GO_BP	up
GO:0002687	positive regulation of leukocyte migration	13/1210	176/28891	0.0343865	0.127489	0.0934929	Tnfrsf18/Pla2g7/Pgf/Edn2/Cxcl10/Mdk/Stk39/Cx3cl1/Rac1/Akirin1/Mapk3/Gas6/Selenok	13	GO_BP	up
GO:0045216	cell-cell junction organization	16/1210	231/28891	0.0344705	0.127714	0.0936579	Irx3/Ocln/Cdh24/Grhl1/Nedd4l/Cd9/Rab13/Ccm2/Ildr1/Cgn/Perp/Lsr/Rhoc/Rac1/Actg1/Jup	16	GO_BP	up
GO:0036465	synaptic vesicle recycling	8/1210	90/28891	0.034955	0.129331	0.0948441	Sncb/Cd24a/Rab3a/Cdk5/Actg1/Arf6/Bin1/Ap2s1	8	GO_BP	up
GO:0042330	taxis	28/1210	464/28891	0.0349917	0.129331	0.0948441	Cxcl1/Pla2g7/Pgf/Edn2/Cmtm8/Hspb1/Fgf1/Cxcl10/Rab13/Sema3f/Hmgb2/Lrp1/Mdk/Notch1/Mmp2/Tubb2b/Prkcd/Stk39/Cx3cl1/Rac1/Akirin1/Plgrkt/Bsg/Mapk3/Gas6/Mif/Cmtm7/Cttn	28	GO_BP	up
GO:0070304	positive regulation of stress-activated protein kinase signaling cascade	11/1210	141/28891	0.0351201	0.129331	0.0948441	Hras/Ripk1/Gsn/Gadd45b/Gadd45a/Rell1/Map3k1/Stk39/Ltbr/Arl6ip5/Stk25	11	GO_BP	up
GO:0032922	circadian regulation of gene expression	7/1210	74/28891	0.0351585	0.129331	0.0948441	Noct/Rbm4/Gfpt1/Top1/Csnk1e/Hdac2/Atf4	7	GO_BP	up
GO:0035904	aorta development	7/1210	74/28891	0.0351585	0.129331	0.0948441	Hey1/Jag1/Six1/Lrp1/Notch1/Hes1/Sox4	7	GO_BP	up
GO:1901264	carbohydrate derivative transport	7/1210	74/28891	0.0351585	0.129331	0.0948441	Vldlr/Slc35b1/Slc25a17/Slc35b2/Ralbp1/Slc25a5/Pltp	7	GO_BP	up
GO:0002837	regulation of immune response to tumor cell	4/1210	30/28891	0.035285	0.129331	0.0948441	Cd24a/Nectin2/Cd274/Hspd1	4	GO_BP	up
GO:0003171	atrioventricular valve development	4/1210	30/28891	0.035285	0.129331	0.0948441	Hey1/Heyl/Notch1/Sox4	4	GO_BP	up
GO:0031664	regulation of lipopolysaccharide-mediated signaling pathway	4/1210	30/28891	0.035285	0.129331	0.0948441	Trib1/Cx3cl1/Prdx2/Mif	4	GO_BP	up
GO:0042744	hydrogen peroxide catabolic process	4/1210	30/28891	0.035285	0.129331	0.0948441	Txnrd1/Prdx2/Prdx5/Prdx1	4	GO_BP	up
GO:0044346	fibroblast apoptotic process	4/1210	30/28891	0.035285	0.129331	0.0948441	Nupr1/Socs1/Ier3ip1/Gas6	4	GO_BP	up
GO:0045730	respiratory burst	4/1210	30/28891	0.035285	0.129331	0.0948441	Cd24a/Rac1/Prdx2/Selenok	4	GO_BP	up
GO:0045932	negative regulation of muscle contraction	4/1210	30/28891	0.035285	0.129331	0.0948441	Arg2/Grk2/Adrb1/Bin1	4	GO_BP	up
GO:0048199	vesicle targeting, to, from or within Golgi	4/1210	30/28891	0.035285	0.129331	0.0948441	Trappc2/Trappc4/Trappc2l/Sar1b	4	GO_BP	up
GO:0051156	glucose 6-phosphate metabolic process	4/1210	30/28891	0.035285	0.129331	0.0948441	Tkt/Taldo1/Nfe2l1/Pgls	4	GO_BP	up
GO:0051894	positive regulation of focal adhesion assembly	4/1210	30/28891	0.035285	0.129331	0.0948441	Fmn1/S100a10/Sdc4/Rac1	4	GO_BP	up
GO:0043534	blood vessel endothelial cell migration	10/1210	124/28891	0.0356867	0.130669	0.0958256	Plk2/Hspb1/Rgcc/Notch1/Cib1/Gadd45a/Csnk2b/Nfe2l2/Col18a1/Jup	10	GO_BP	up
GO:0070167	regulation of biomineral tissue development	9/1210	107/28891	0.0357217	0.130669	0.0958256	Sgms2/Hey1/Cebpb/Notch1/Rflnb/Sox9/Gas6/Zmpste24/Atf4	9	GO_BP	up
GO:2001252	positive regulation of chromosome organization	9/1210	107/28891	0.0357217	0.130669	0.0958256	Cct7/Smc4/Mapk3/Cct2/Tcp1/Xrcc5/Ruvbl1/Cct6a/Cct8	9	GO_BP	up
GO:0044331	cell-cell adhesion mediated by cadherin	5/1210	44/28891	0.0359693	0.1314	0.0963611	Cdh24/Rgcc/Notch1/Flot1/Epcam	5	GO_BP	up
GO:0045022	early endosome to late endosome transport	5/1210	44/28891	0.0359693	0.1314	0.0963611	Becn1/Ezr/Snx3/Mapk3/Sh3glb1	5	GO_BP	up
GO:0009101	glycoprotein biosynthetic process	19/1210	289/28891	0.0360441	0.131585	0.0964971	Il33/Hs3st6/Aqp11/Galnt14/B3gnt2/Phlda1/Galnt2/Itm2c/Itm2b/B4galt1/Ugdh/B3galt5/Slc35b2/C1galt1c1/Ddost/Gfpt1/Mlec/Tmem59/Tcf7l2	19	GO_BP	up
GO:0042098	T cell proliferation	18/1210	270/28891	0.0360838	0.131642	0.0965391	Cd24a/Arg2/Fyn/Bmi1/Cd81/Cd274/Cebpb/H2-DMb1/Dhps/Hes1/Irf1/Sdc4/Prkar1a/Prdx2/Cd151/Bax/Fkbp1a/Selenok	18	GO_BP	up
GO:0006695	cholesterol biosynthetic process	6/1210	59/28891	0.0364713	0.132702	0.0973163	Ces1d/Ces1b/Hsd17b7/Fgf1/Sc5d/Cyb5r3	6	GO_BP	up
GO:0031663	lipopolysaccharide-mediated signaling pathway	6/1210	59/28891	0.0364713	0.132702	0.0973163	Trib1/Nfkbia/Cx3cl1/Prdx2/Mapk3/Mif	6	GO_BP	up
GO:1902653	secondary alcohol biosynthetic process	6/1210	59/28891	0.0364713	0.132702	0.0973163	Ces1d/Ces1b/Hsd17b7/Fgf1/Sc5d/Cyb5r3	6	GO_BP	up
GO:2000351	regulation of endothelial cell apoptotic process	6/1210	59/28891	0.0364713	0.132702	0.0973163	Rgcc/Pak4/Nfe2l2/Pdcd4/Gas6/Col18a1	6	GO_BP	up
GO:0046700	heterocycle catabolic process	27/1210	446/28891	0.0366096	0.133117	0.0976206	Dera/Urah/Carhsp1/Upb1/Isg20/Dnase2a/Noct/Rnaseh2a/Zfp36/Polr2g/Btg2/Pelo/Dut/Pcbp4/Eloc/Nudt3/Ttc5/Mrto4/Trir/Nudt18/Nfe2l2/Pnrc1/Bax/Cnot6/Rbm7/Lsm1/Rbm47	27	GO_BP	up
GO:0051251	positive regulation of lymphocyte activation	23/1210	367/28891	0.0366411	0.133143	0.0976396	Cd24a/Cdkn1a/Bmi1/Cd81/Cd274/Sh3kbp1/H2-DMb1/Mdk/Dhps/Rara/Hes1/Irf1/Socs1/Ppp2r3c/Sox4/Tcf3/Il7/Smarcd2/Gas6/Mif/Hspd1/Akirin2/Selenok	23	GO_BP	up
GO:0030177	positive regulation of Wnt signaling pathway	11/1210	142/28891	0.0366901	0.133233	0.0977053	Nrarp/Tbl1xr1/Map3k1/Sox4/Zbed3/Nfkb1/Pin1/Ube2b/Csnk1e/Ruvbl1/Atp6v0c	11	GO_BP	up
GO:0090398	cellular senescence	8/1210	91/28891	0.0369756	0.134139	0.0983702	Arg2/Cdkn1a/Plk2/Hras/Eef1e1/Prkcd/Mif/Zmpste24	8	GO_BP	up
GO:0010639	negative regulation of organelle organization	24/1210	387/28891	0.0369887	0.134139	0.0983702	Capg/Nupr1/Sgk1/Pick1/Gsn/Cib1/Fkbp4/Sub1/Ier3/Prkcd/H3f3b/Map3k1/Becn1/Gclc/Zwint/Dync1li1/Kat2b/H3f3a/Slc25a5/Ghitm/Twf1/Capzb/Mtpn/Gdi2	24	GO_BP	up
GO:0008643	carbohydrate transport	12/1210	160/28891	0.0371306	0.134548	0.0986699	Ocln/Aqp3/Slc5a9/Grk2/Pls1/Capn10/Rab4b/Prkcd/Gsk3a/Ezr/Nfe2l2/Slc27a1	12	GO_BP	up
GO:0050817	coagulation	13/1210	178/28891	0.0371523	0.134548	0.0986699	Plat/F3/Serpine2/Cd9/Ubash3b/Bloc1s4/Prkcd/Pdia4/C1galt1c1/Prdx2/Nfe2l2/Gas6/Anxa5	13	GO_BP	up
GO:0002830	positive regulation of type 2 immune response	3/1210	18/28891	0.0373731	0.134548	0.0986699	Il33/Cd81/Rara	3	GO_BP	up
GO:0010310	regulation of hydrogen peroxide metabolic process	3/1210	18/28891	0.0373731	0.134548	0.0986699	Duoxa1/Fyn/Prdx2	3	GO_BP	up
GO:0021781	glial cell fate commitment	3/1210	18/28891	0.0373731	0.134548	0.0986699	Sox9/Nfe2l1/Nfix	3	GO_BP	up
GO:0033194	response to hydroperoxide	3/1210	18/28891	0.0373731	0.134548	0.0986699	Dapk1/Prkcd/Trp53inp1	3	GO_BP	up
GO:0048715	negative regulation of oligodendrocyte differentiation	3/1210	18/28891	0.0373731	0.134548	0.0986699	Nkx6-2/Notch1/Hes1	3	GO_BP	up
GO:0061051	positive regulation of cell growth involved in cardiac muscle cell development	3/1210	18/28891	0.0373731	0.134548	0.0986699	Adrb1/Pin1/Ddx39b	3	GO_BP	up
GO:0070920	regulation of regulatory ncRNA processing	3/1210	18/28891	0.0373731	0.134548	0.0986699	Bcdin3d/Ripk1/Zmpste24	3	GO_BP	up
GO:0098760	response to interleukin-7	3/1210	18/28891	0.0373731	0.134548	0.0986699	Gipc1/P4hb/Hspd1	3	GO_BP	up
GO:1905939	regulation of gonad development	3/1210	18/28891	0.0373731	0.134548	0.0986699	Nupr1/Cited2/Sox9	3	GO_BP	up
GO:0046545	development of primary female sexual characteristics	10/1210	125/28891	0.0373963	0.134548	0.0986699	Nppc/Edn2/Grk2/Nupr1/Cebpb/Mmp2/Adrm1/Rac1/Eif2b2/Bax	10	GO_BP	up
GO:0010833	telomere maintenance via telomere lengthening	7/1210	75/28891	0.0374329	0.134591	0.0987016	Cct7/Mapk3/Cct2/Tcp1/Xrcc5/Cct6a/Cct8	7	GO_BP	up
GO:0019751	polyol metabolic process	9/1210	108/28891	0.0375824	0.13504	0.0990309	Sptssb/Gk5/Got1/Ephx1/Nudt3/Impa1/Qdpr/Pcbd2/Spr	9	GO_BP	up
GO:0048771	tissue remodeling	15/1210	215/28891	0.0376184	0.135081	0.0990607	Cd24a/Pdk4/Nppc/Elf3/Jag1/Lrp1/Ubash3b/Mdk/Mmp2/Klf6/Rac1/Il7/Nfkb1/Bax/Suco	15	GO_BP	up
GO:0044703	multi-organism reproductive process	14/1210	197/28891	0.0382193	0.137149	0.100577	Serpine2/Hpgd/Mmp2/Cited2/Fkbp4/H3f3b/Ndrg3/Lamb1/Tmed2/Ctsl/Junb/Mapk3/Comt/Ube2q1	14	GO_BP	up
GO:0014013	regulation of gliogenesis	11/1210	143/28891	0.0383086	0.137217	0.100627	Il33/Serpine2/Nkx6-2/Prpf19/Mdk/Notch1/Hes1/Cers2/Idh2/Bin1/Hdac2	11	GO_BP	up
GO:0032760	positive regulation of tumor necrosis factor production	11/1210	143/28891	0.0383086	0.137217	0.100627	Il33/Clu/Spon2/Hspb1/Arid5a/Ripk1/Akap12/Mif/Hdac2/Hspd1/Selenok	11	GO_BP	up
GO:0097529	myeloid leukocyte migration	17/1210	253/28891	0.0383136	0.137217	0.100627	Cxcl1/Pla2g7/Pgf/Edn2/Cd81/Cd9/Cxcl10/Mdk/Mmp2/B4galt1/Cx3cl1/Rac1/Akirin1/Bsg/Mapk3/Mif/Selenok	17	GO_BP	up
GO:0007565	female pregnancy	13/1210	179/28891	0.0385929	0.138037	0.101229	Hpgd/Mmp2/Cited2/Fkbp4/H3f3b/Ndrg3/Lamb1/Tmed2/Ctsl/Junb/Mapk3/Comt/Ube2q1	13	GO_BP	up
GO:0007599	hemostasis	13/1210	179/28891	0.0385929	0.138037	0.101229	Plat/F3/Serpine2/Cd9/Ubash3b/Bloc1s4/Prkcd/Pdia4/C1galt1c1/Prdx2/Nfe2l2/Gas6/Anxa5	13	GO_BP	up
GO:0032943	mononuclear cell proliferation	24/1210	389/28891	0.038887	0.138449	0.101531	Cd24a/Arg2/Cdkn1a/Fyn/Bmi1/Cd81/Cd274/Cebpb/H2-DMb1/Dhps/Hes1/Irf1/Prkcd/Sdc4/Tcf3/Il7/Prkar1a/Prdx2/Cd151/Bax/Mif/Hspd1/Fkbp1a/Selenok	24	GO_BP	up
GO:0097696	receptor signaling pathway via STAT	15/1210	216/28891	0.0389291	0.138449	0.101531	Tnfrsf18/Fyn/Notch1/Hes1/Gadd45a/Osbp/Irf1/Cdk5/Socs1/Rac1/Ctf1/Adipor1/Hdac2/Crlf3/Calm1	15	GO_BP	up
GO:0097581	lamellipodium organization	8/1210	92/28891	0.0390733	0.138449	0.101531	Arpc5/Rac1/Akirin1/Mtss2/Cttn/Abi1/Twf1/Capzb	8	GO_BP	up
GO:1903321	negative regulation of protein modification by small protein conjugation or removal	8/1210	92/28891	0.0390733	0.138449	0.101531	Fyn/Bag5/Cdk5/Gclc/Sox4/Bex3/Gtpbp4/Hmg20b	8	GO_BP	up
GO:0006904	vesicle docking involved in exocytosis	5/1210	45/28891	0.039122	0.138449	0.101531	Gnao1/Rab3a/Rab13/Exoc7/Ralb	5	GO_BP	up
GO:0032781	positive regulation of ATP-dependent activity	5/1210	45/28891	0.039122	0.138449	0.101531	Atp1b1/Napa/Dnajb1/Atp1b3/Tor1aip2	5	GO_BP	up
GO:0099590	neurotransmitter receptor internalization	5/1210	45/28891	0.039122	0.138449	0.101531	Pick1/Sh3glb2/Ppp3r1/Rala/Ap2s1	5	GO_BP	up
GO:1903524	positive regulation of blood circulation	5/1210	45/28891	0.039122	0.138449	0.101531	Rgs4/Edn2/Adrb1/Gsk3a/Atp1a1	5	GO_BP	up
GO:2000516	positive regulation of CD4-positive, alpha-beta T cell activation	5/1210	45/28891	0.039122	0.138449	0.101531	Cd24a/Cd81/Rara/Irf1/Socs1	5	GO_BP	up
GO:0006338	chromatin remodeling	29/1210	489/28891	0.0391274	0.138449	0.101531	H3c15/H1f2/Rnf2/Eed/H2ac25/H3f3b/Nap1l4/Gsk3a/Kat8/Ss18/Wbp2/Sox9/Tcf3/Kat2b/Cebpg/Kdm5b/Skp1/Suds3/Smarcd2/H3f3a/Hpf1/Top1/Zmpste24/Hdac2/Dpy30/Ruvbl1/Hmg20b/Set/Anp32b	29	GO_BP	up
GO:0042149	cellular response to glucose starvation	6/1210	60/28891	0.0391447	0.138449	0.101531	Pick1/Becn1/Nfe2l2/Hspa5/Atf4/Sh3glb1	6	GO_BP	up
GO:0035303	regulation of dephosphorylation	10/1210	126/28891	0.0391616	0.138449	0.101531	Ppp1r16b/Ppp1r2/Prkcd/Ppp2r3c/Tiprl/Hsp90b1/Pin1/Calm3/Calm1/Arpp19	10	GO_BP	up
GO:0006536	glutamate metabolic process	4/1210	31/28891	0.0392138	0.138449	0.101531	Got1/Gclc/Glul/Gclm	4	GO_BP	up
GO:0006779	porphyrin-containing compound biosynthetic process	4/1210	31/28891	0.0392138	0.138449	0.101531	Alas1/Alad/Snx3/Cpox	4	GO_BP	up
GO:0031629	synaptic vesicle fusion to presynaptic active zone membrane	4/1210	31/28891	0.0392138	0.138449	0.101531	Rab3a/Snapin/Stx11/Snap47	4	GO_BP	up
GO:0032801	receptor catabolic process	4/1210	31/28891	0.0392138	0.138449	0.101531	Cdk5/Becn1/Mylip/Sh3glb1	4	GO_BP	up
GO:0033014	tetrapyrrole biosynthetic process	4/1210	31/28891	0.0392138	0.138449	0.101531	Alas1/Alad/Snx3/Cpox	4	GO_BP	up
GO:0035767	endothelial cell chemotaxis	4/1210	31/28891	0.0392138	0.138449	0.101531	Hspb1/Fgf1/Rab13/Notch1	4	GO_BP	up
GO:0043276	anoikis	4/1210	31/28891	0.0392138	0.138449	0.101531	Pdk4/Notch1/Ptrh2/Mcl1	4	GO_BP	up
GO:1905523	positive regulation of macrophage migration	4/1210	31/28891	0.0392138	0.138449	0.101531	Mdk/Cx3cl1/Akirin1/Mapk3	4	GO_BP	up
GO:0051303	establishment of chromosome localization	9/1210	109/28891	0.0395081	0.139398	0.102227	Racgap1/Becn1/Chmp4c/Chmp1b/Chmp5/Kat2b/Rrs1/Ube2b/Rab11a	9	GO_BP	up
GO:0021915	neural tube development	14/1210	198/28891	0.039612	0.139675	0.10243	Bmi1/Rara/Notch1/Lmo4/Hes1/Cited2/Casp8/Coq7/St14/Vasp/Tmed2/Sdc4/Rala/Tcf7l2	14	GO_BP	up
GO:0016311	dephosphorylation	21/1210	331/28891	0.0397077	0.139832	0.102545	Plppr1/Ptpre/Ppp1r16b/Dusp12/Dusp14/Psph/Ubash3b/Ppp1r2/Ppp5c/Prkcd/Ppp2r3c/Dusp28/Tiprl/Hdhd2/Hsp90b1/Pin1/Ppp3r1/Ptpmt1/Calm3/Calm1/Arpp19	21	GO_BP	up
GO:0060326	cell chemotaxis	21/1210	331/28891	0.0397077	0.139832	0.102545	Cxcl1/Pla2g7/Pgf/Edn2/Hspb1/Fgf1/Cxcl10/Rab13/Hmgb2/Mdk/Notch1/Mmp2/Prkcd/Stk39/Cx3cl1/Rac1/Akirin1/Bsg/Mapk3/Gas6/Mif	21	GO_BP	up
GO:0055002	striated muscle cell development	7/1210	76/28891	0.0398018	0.140074	0.102722	Krt19/Nebl/Neurl2/Krt8/Prkar1a/Actg1/Hdac2	7	GO_BP	up
GO:0006665	sphingolipid metabolic process	11/1210	144/28891	0.0399762	0.140507	0.10304	Sgms2/Sptssb/Hacd2/Elovl7/Cers2/Osbp/Prkcd/Elovl6/Hexb/Bax/Vapa	11	GO_BP	up
GO:1905039	carboxylic acid transmembrane transport	11/1210	144/28891	0.0399762	0.140507	0.10304	Rgs4/Arg2/Slc25a21/Slc1a4/Prkcd/Slc3a2/Slc25a11/Arl6ip5/Sfxn1/Slc27a1/Mpc1	11	GO_BP	up
GO:0010970	transport along microtubule	13/1210	180/28891	0.0400727	0.140756	0.103222	Hspb1/Bloc1s4/Ssx2ip/Tuba1a/Arl8a/Snapin/Kif5b/Ift43/Borcs8/Copg1/Actr10/Ift20/Dynll1	13	GO_BP	up
GO:0071222	cellular response to lipopolysaccharide	20/1210	312/28891	0.0401545	0.140953	0.103367	Cxcl1/Spon2/Arid5a/Selenos/Cd274/Cxcl10/Cebpb/Trib1/Rara/Zfp36/Paf1/Nfkbia/Chmp5/Cx3cl1/Nfkb1/Prdx2/Pdcd4/Mapk3/Hadhb/Mif	20	GO_BP	up
GO:0050863	regulation of T cell activation	25/1210	411/28891	0.0410185	0.143893	0.105523	Dapl1/Cd24a/Arg2/Nrarp/Bmi1/Cd81/Hspb1/Cd274/Cebpb/H2-DMb1/Mdk/Dhps/Rara/Hes1/Irf1/Socs1/Adrm1/Sox4/Sdc4/Il7/Prkar1a/Prdx2/Smarcd2/Hspd1/Selenok	25	GO_BP	up
GO:0008593	regulation of Notch signaling pathway	8/1210	93/28891	0.0412489	0.144607	0.106047	Tcim/Nrarp/Hey1/Jag1/Enho/Notch1/Hes1/Nfkbia	8	GO_BP	up
GO:0072001	renal system development	22/1210	352/28891	0.0412749	0.144607	0.106047	Irx3/Rarb/Cd24a/Arg2/Pgf/Aqp11/Fgf1/Hey1/Jag1/Six1/Heyl/Fmn1/Rara/Notch1/Hes1/Lzts2/Sox4/Sox9/Bax/Epcam/Zmpste24/Ift20	22	GO_BP	up
GO:1903557	positive regulation of tumor necrosis factor superfamily cytokine production	11/1210	145/28891	0.0416935	0.145887	0.106985	Il33/Clu/Spon2/Hspb1/Arid5a/Ripk1/Akap12/Mif/Hdac2/Hspd1/Selenok	11	GO_BP	up
GO:1903825	organic acid transmembrane transport	11/1210	145/28891	0.0416935	0.145887	0.106985	Rgs4/Arg2/Slc25a21/Slc1a4/Prkcd/Slc3a2/Slc25a11/Arl6ip5/Sfxn1/Slc27a1/Mpc1	11	GO_BP	up
GO:0016125	sterol metabolic process	12/1210	163/28891	0.0418463	0.146329	0.107309	Ces1d/Ces1b/Hsd17b7/Fgf1/Vldlr/Lrp1/Cebpa/Fdx1/Sqle/Sc5d/Cyb5r3/Nfe2l1	12	GO_BP	up
GO:0000288	nuclear-transcribed mRNA catabolic process, deadenylation-dependent decay	6/1210	61/28891	0.0419394	0.14656	0.107479	Noct/Zfp36/Polr2g/Btg2/Cnot6/Lsm1	6	GO_BP	up
GO:0042982	amyloid precursor protein metabolic process	7/1210	77/28891	0.0422664	0.147609	0.108248	Clu/Itm2c/Itm2b/Gsk3a/Pin1/Csnk1e/Bin1	7	GO_BP	up
GO:0030835	negative regulation of actin filament depolymerization	5/1210	46/28891	0.0424377	0.147924	0.108479	Capg/Gsn/Twf1/Capzb/Mtpn	5	GO_BP	up
GO:0070542	response to fatty acid	5/1210	46/28891	0.0424377	0.147924	0.108479	Pdk4/Ildr1/Ppp5c/Sox9/Ranbp1	5	GO_BP	up
GO:1902991	regulation of amyloid precursor protein catabolic process	5/1210	46/28891	0.0424377	0.147924	0.108479	Clu/Gsk3a/Pin1/Csnk1e/Bin1	5	GO_BP	up
GO:0006851	mitochondrial calcium ion transmembrane transport	3/1210	19/28891	0.0430365	0.14857	0.108953	Maip1/Vdac1/Ghitm	3	GO_BP	up
GO:0006978	DNA damage response, signal transduction by p53 class mediator resulting in transcription of p21 class mediator	3/1210	19/28891	0.0430365	0.14857	0.108953	Cdkn1a/Pcbp4/Rps27l	3	GO_BP	up
GO:0010867	positive regulation of triglyceride biosynthetic process	3/1210	19/28891	0.0430365	0.14857	0.108953	Slc27a1/Nr1h2/Tcf7l2	3	GO_BP	up
GO:0014841	skeletal muscle satellite cell proliferation	3/1210	19/28891	0.0430365	0.14857	0.108953	Six1/Akirin1/Sugt1	3	GO_BP	up
GO:0021783	preganglionic parasympathetic fiber development	3/1210	19/28891	0.0430365	0.14857	0.108953	Sema3f/Six1/Hes1	3	GO_BP	up
GO:0042415	norepinephrine metabolic process	3/1210	19/28891	0.0430365	0.14857	0.108953	Rtl4/Spr/Ly6e	3	GO_BP	up
GO:0051131	chaperone-mediated protein complex assembly	3/1210	19/28891	0.0430365	0.14857	0.108953	Clu/Stub1/Cct2	3	GO_BP	up
GO:0060396	growth hormone receptor signaling pathway	3/1210	19/28891	0.0430365	0.14857	0.108953	Gdf15/Adrm1/Leprotl1	3	GO_BP	up
GO:0070417	cellular response to cold	3/1210	19/28891	0.0430365	0.14857	0.108953	Ces1d/Dnajc3/Nfe2l1	3	GO_BP	up
GO:0071378	cellular response to growth hormone stimulus	3/1210	19/28891	0.0430365	0.14857	0.108953	Gdf15/Adrm1/Leprotl1	3	GO_BP	up
GO:0072087	renal vesicle development	3/1210	19/28891	0.0430365	0.14857	0.108953	Hey1/Fmn1/Sox9	3	GO_BP	up
GO:0098696	regulation of neurotransmitter receptor localization to postsynaptic specialization membrane	3/1210	19/28891	0.0430365	0.14857	0.108953	Gpc6/Rapgef4/Hras	3	GO_BP	up
GO:1902430	negative regulation of amyloid-beta formation	3/1210	19/28891	0.0430365	0.14857	0.108953	Clu/Pin1/Bin1	3	GO_BP	up
GO:1905664	regulation of calcium ion import across plasma membrane	3/1210	19/28891	0.0430365	0.14857	0.108953	Fyn/Adrb1/Ppp3r1	3	GO_BP	up
GO:2000651	positive regulation of sodium ion transmembrane transporter activity	3/1210	19/28891	0.0430365	0.14857	0.108953	Atp1b1/Scn1b/Kif5b	3	GO_BP	up
GO:0045017	glycerolipid biosynthetic process	15/1210	219/28891	0.0430572	0.14857	0.108953	Pigf/Chpt1/Pnpla2/Socs1/Becn1/Pip4k2c/Abhd5/Bpnt1/Cds1/Impa1/Slc27a1/Ptpmt1/Nr1h2/Tcf7l2/Sh3glb1	15	GO_BP	up
GO:0045766	positive regulation of angiogenesis	13/1210	182/28891	0.0431515	0.148708	0.109054	Camp/Pgf/F3/Hspb1/Fgf1/Pak4/Mdk/Rhob/S100a1/Pdcl3/Nfe2l2/Nras/Jup	13	GO_BP	up
GO:1904018	positive regulation of vasculature development	13/1210	182/28891	0.0431515	0.148708	0.109054	Camp/Pgf/F3/Hspb1/Fgf1/Pak4/Mdk/Rhob/S100a1/Pdcl3/Nfe2l2/Nras/Jup	13	GO_BP	up
GO:0000096	sulfur amino acid metabolic process	4/1210	32/28891	0.0433818	0.148753	0.109087	Cdo1/Gclc/Comt/Gclm	4	GO_BP	up
GO:0048641	regulation of skeletal muscle tissue development	4/1210	32/28891	0.0433818	0.148753	0.109087	Ybx3/Flot1/Nras/Tcf7l2	4	GO_BP	up
GO:0051654	establishment of mitochondrion localization	4/1210	32/28891	0.0433818	0.148753	0.109087	Nectin2/Kif5b/Actr10/Dynll1	4	GO_BP	up
GO:0071548	response to dexamethasone	4/1210	32/28891	0.0433818	0.148753	0.109087	Trim63/Fibin/Fbxo32/Eif4e	4	GO_BP	up
GO:0099500	vesicle fusion to plasma membrane	4/1210	32/28891	0.0433818	0.148753	0.109087	Rab3a/Snapin/Stx11/Snap47	4	GO_BP	up
GO:1902683	regulation of receptor localization to synapse	4/1210	32/28891	0.0433818	0.148753	0.109087	Gpc6/Rapgef4/Hras/Stx7	4	GO_BP	up
GO:1903146	regulation of autophagy of mitochondrion	4/1210	32/28891	0.0433818	0.148753	0.109087	Gsk3a/Vdac1/Slc25a5/Cttn	4	GO_BP	up
GO:1990776	response to angiotensin	4/1210	32/28891	0.0433818	0.148753	0.109087	Prkcd/Rac1/Nfkb1/Nfe2l2	4	GO_BP	up
GO:0051310	metaphase chromosome alignment	8/1210	94/28891	0.0435034	0.149077	0.109324	Racgap1/Becn1/Chmp4c/Chmp1b/Chmp5/Kat2b/Rrs1/Rab11a	8	GO_BP	up
GO:0055013	cardiac muscle cell development	9/1210	111/28891	0.0435576	0.149169	0.109392	Rgs4/Sorbs2/Nebl/Adrb1/Gsk3a/Pin1/Zmpste24/Hdac2/Ddx39b	9	GO_BP	up
GO:0050867	positive regulation of cell activation	27/1210	454/28891	0.043961	0.150457	0.110336	Il33/Cd24a/Nppc/Cdkn1a/Bmi1/Cd81/Nectin2/Cd274/Sh3kbp1/H2-DMb1/Mdk/Dhps/Rara/Hes1/Cebpa/Irf1/Socs1/Ppp2r3c/Sox4/Tcf3/Il7/Smarcd2/Gas6/Mif/Hspd1/Akirin2/Selenok	27	GO_BP	up
GO:0017148	negative regulation of translation	15/1210	220/28891	0.0444998	0.15211	0.111549	Dapk1/Noct/Rara/Zfp36/Polr2g/Btg2/Rbm4/Gapdh/Eif4e/Cnot6/Lsm1/Srp9/Mrpl13/Paip2/Eif2s1	15	GO_BP	up
GO:0043414	macromolecule methylation	15/1210	220/28891	0.0444998	0.15211	0.111549	Bmi1/Prdm6/Bcdin3d/H1f2/Eef1akmt2/Eed/Btg2/Kmt5a/Rab6a/Kat8/Pcmt1/Prmt1/Zmpste24/Ramac/Snrpd3	15	GO_BP	up
GO:0048488	synaptic vesicle endocytosis	7/1210	78/28891	0.0448276	0.152948	0.112163	Sncb/Cd24a/Cdk5/Actg1/Arf6/Bin1/Ap2s1	7	GO_BP	up
GO:0042446	hormone biosynthetic process	6/1210	62/28891	0.0448564	0.152948	0.112163	Hsd17b7/Srd5a1/Stc2/Fdx1/Atp1a1/Nfkb1	6	GO_BP	up
GO:0072577	endothelial cell apoptotic process	6/1210	62/28891	0.0448564	0.152948	0.112163	Rgcc/Pak4/Nfe2l2/Pdcd4/Gas6/Col18a1	6	GO_BP	up
GO:1903409	reactive oxygen species biosynthetic process	6/1210	62/28891	0.0448564	0.152948	0.112163	Arg2/Duoxa1/Fyn/Ndufc2/Hbp1/Hspd1	6	GO_BP	up
GO:0015931	nucleobase-containing compound transport	14/1210	202/28891	0.045544	0.155002	0.11367	Ripk1/Zfp36/Slc35b1/Slc25a17/Sec13/Slc35b2/Mrpl18/Tomm20/Flot1/Thoc7/Slc25a5/Sarnp/Ddx39b/Eny2	14	GO_BP	up
GO:0048659	smooth muscle cell proliferation	14/1210	202/28891	0.045544	0.155002	0.11367	Cdkn1a/Grk2/Ndrg2/Spon2/Hpgd/Trib1/Mmp2/Cx3cl1/Pdcd4/Cdkn1b/Comt/Xrcc5/Tcf7l2/Ddx39b	14	GO_BP	up
GO:0071902	positive regulation of protein serine/threonine kinase activity	14/1210	202/28891	0.045544	0.155002	0.11367	Cd24a/Tcim/Hras/Rgcc/Fgf1/Ccnd2/Cib1/Prkcd/Map3k1/Pim1/Mif/Cdkn1b/Ralb/Hsp90ab1	14	GO_BP	up
GO:0002027	regulation of heart rate	9/1210	112/28891	0.045683	0.155379	0.113946	Rgs4/Edn2/Adrb1/Scn1b/Dsc2/Bin1/Calm3/Calm1/Jup	9	GO_BP	up
GO:0006383	transcription by RNA polymerase III	5/1210	47/28891	0.0459175	0.155597	0.114106	Nab2/Snapc1/Polr3h/Gtf3c6/Prdx5	5	GO_BP	up
GO:0010824	regulation of centrosome duplication	5/1210	47/28891	0.0459175	0.155597	0.114106	Plk2/Chmp4c/Chmp1b/Chmp5/Kat2b	5	GO_BP	up
GO:0021696	cerebellar cortex morphogenesis	5/1210	47/28891	0.0459175	0.155597	0.114106	Serpine2/Tuba1a/Cdk5/Slc25a46/Nfix	5	GO_BP	up
GO:0046636	negative regulation of alpha-beta T cell activation	5/1210	47/28891	0.0459175	0.155597	0.114106	Dapl1/Arg2/Cd274/Irf1/Socs1	5	GO_BP	up
GO:0120163	negative regulation of cold-induced thermogenesis	5/1210	47/28891	0.0459175	0.155597	0.114106	Arrdc3/Notch1/Abhd6/Nr1h2/Atf4	5	GO_BP	up
GO:2000772	regulation of cellular senescence	5/1210	47/28891	0.0459175	0.155597	0.114106	Arg2/Plk2/Eef1e1/Mif/Zmpste24	5	GO_BP	up
GO:1901136	carbohydrate derivative catabolic process	12/1210	166/28891	0.0469641	0.159045	0.116634	Dera/Urah/Upb1/Prkcd/Dut/Nudt3/Ctsl/Nudt18/Hexb/Fbxo6/Hgsnat/Gnpda2	12	GO_BP	up
GO:0015850	organic hydroxy compound transport	20/1210	318/28891	0.047262	0.159955	0.117302	Ces1d/Ces1b/Selenom/Aqp3/Rab3a/Grk2/Nucb2/Stard5/Lrp1/Osbp/Nfkbia/Osbpl6/Kdm5b/Stard3nl/Tmf1/Ralbp1/Nr1h2/Pltp/Vapa/Ly6e	20	GO_BP	up
GO:0048146	positive regulation of fibroblast proliferation	7/1210	79/28891	0.0474865	0.160449	0.117664	Cdkn1a/Grk2/Hras/Nras/Gas6/Mif/Ndufs4	7	GO_BP	up
GO:0002418	immune response to tumor cell	4/1210	33/28891	0.0477888	0.160449	0.117664	Cd24a/Nectin2/Cd274/Hspd1	4	GO_BP	up
GO:0008045	motor neuron axon guidance	4/1210	33/28891	0.0477888	0.160449	0.117664	Sema3f/Lmo4/Cdk5/Rac1	4	GO_BP	up
GO:0045662	negative regulation of myoblast differentiation	4/1210	33/28891	0.0477888	0.160449	0.117664	Cxcl10/Notch1/Sox4/Sox9	4	GO_BP	up
GO:0046597	negative regulation of viral entry into host cell	4/1210	33/28891	0.0477888	0.160449	0.117664	Gsn/Trim8/Snx3/Ly6e	4	GO_BP	up
GO:0051085	chaperone cofactor-dependent protein refolding	4/1210	33/28891	0.0477888	0.160449	0.117664	H2-DMb1/Dnajb1/Hspa5/Sdf2	4	GO_BP	up
GO:0051642	centrosome localization	4/1210	33/28891	0.0477888	0.160449	0.117664	Nin/Ezr/Kif5b/Ift20	4	GO_BP	up
GO:0060669	embryonic placenta morphogenesis	4/1210	33/28891	0.0477888	0.160449	0.117664	St14/Tmed2/Dnajb6/Grb2	4	GO_BP	up
GO:0060706	cell differentiation involved in embryonic placenta development	4/1210	33/28891	0.0477888	0.160449	0.117664	Krt19/St14/Krt8/Dnajb6	4	GO_BP	up
GO:0061037	negative regulation of cartilage development	4/1210	33/28891	0.0477888	0.160449	0.117664	Rarb/Rara/Rflnb/Sox9	4	GO_BP	up
GO:0070296	sarcoplasmic reticulum calcium ion transport	4/1210	33/28891	0.0477888	0.160449	0.117664	Tmem38a/Zmpste24/Calm3/Calm1	4	GO_BP	up
GO:0140448	signaling receptor ligand precursor processing	4/1210	33/28891	0.0477888	0.160449	0.117664	Ece1/Pcsk6/Hsp90b1/P4hb	4	GO_BP	up
GO:1901797	negative regulation of signal transduction by p53 class mediator	4/1210	33/28891	0.0477888	0.160449	0.117664	Pcbp4/Pttg1ip/Mif/Sh3glb1	4	GO_BP	up
GO:0010665	regulation of cardiac muscle cell apoptotic process	6/1210	63/28891	0.0478968	0.160614	0.117785	Fbxo32/Nupr1/Acot1/Mdk/Nfe2l2/Pcmt1	6	GO_BP	up
GO:0045620	negative regulation of lymphocyte differentiation	6/1210	63/28891	0.0478968	0.160614	0.117785	Nrarp/Hspb1/Mdk/Irf1/Socs1/Prdx2	6	GO_BP	up
GO:0032204	regulation of telomere maintenance	8/1210	96/28891	0.0482524	0.161609	0.118515	Cct7/Mapk3/Cct2/Tcp1/Xrcc5/Ruvbl1/Cct6a/Cct8	8	GO_BP	up
GO:0034644	cellular response to UV	8/1210	96/28891	0.0482524	0.161609	0.118515	Cdkn1a/Mmp2/H2ac25/Prkcd/Rbx1/Trp53inp1/Bax/Eif2s1	8	GO_BP	up
GO:0006469	negative regulation of protein kinase activity	14/1210	204/28891	0.048732	0.162269	0.118999	Cdkn1a/Hspb1/Cdkn2c/Ubash3b/Trib1/Gadd45b/Gadd45a/Akt1s1/Prkcd/Tsg101/Dnajc3/Kat2b/Prkar1a/Cdkn1b	14	GO_BP	up
GO:0035710	CD4-positive, alpha-beta T cell activation	10/1210	131/28891	0.0488486	0.162269	0.118999	Cd24a/Arg2/Cd81/Cd274/Cebpb/Rara/Irf1/Socs1/Ctsl/Pax1	10	GO_BP	up
GO:0003215	cardiac right ventricle morphogenesis	3/1210	20/28891	0.0491016	0.162269	0.118999	Jag1/Notch1/Sox4	3	GO_BP	up
GO:0006098	pentose-phosphate shunt	3/1210	20/28891	0.0491016	0.162269	0.118999	Tkt/Taldo1/Pgls	3	GO_BP	up
GO:0006662	glycerol ether metabolic process	3/1210	20/28891	0.0491016	0.162269	0.118999	Pla2g7/Peds1/Chpt1	3	GO_BP	up
GO:0007379	segment specification	3/1210	20/28891	0.0491016	0.162269	0.118999	Irx3/Meox1/Six1	3	GO_BP	up
GO:0010958	regulation of amino acid import across plasma membrane	3/1210	20/28891	0.0491016	0.162269	0.118999	Rgs4/Arg2/Arl6ip5	3	GO_BP	up
GO:0015936	coenzyme A metabolic process	3/1210	20/28891	0.0491016	0.162269	0.118999	Ppcs/Coasy/Crot	3	GO_BP	up
GO:0032252	secretory granule localization	3/1210	20/28891	0.0491016	0.162269	0.118999	Uso1/Kif5b/Tcf7l2	3	GO_BP	up
GO:0032986	protein-DNA complex disassembly	3/1210	20/28891	0.0491016	0.162269	0.118999	H2ac25/Cebpg/Smarcd2	3	GO_BP	up
GO:0033962	P-body assembly	3/1210	20/28891	0.0491016	0.162269	0.118999	Noct/Lsm3/Cnot6	3	GO_BP	up
GO:0042772	DNA damage response, signal transduction resulting in transcription	3/1210	20/28891	0.0491016	0.162269	0.118999	Cdkn1a/Pcbp4/Rps27l	3	GO_BP	up
GO:0045947	negative regulation of translational initiation	3/1210	20/28891	0.0491016	0.162269	0.118999	Rbm4/Paip2/Eif2s1	3	GO_BP	up
GO:0046485	ether lipid metabolic process	3/1210	20/28891	0.0491016	0.162269	0.118999	Pla2g7/Peds1/Chpt1	3	GO_BP	up
GO:0046827	positive regulation of protein export from nucleus	3/1210	20/28891	0.0491016	0.162269	0.118999	Sfn/Gas6/Anp32b	3	GO_BP	up
GO:0060314	regulation of ryanodine-sensitive calcium-release channel activity	3/1210	20/28891	0.0491016	0.162269	0.118999	Calm3/Calm1/Fkbp1a	3	GO_BP	up
GO:0072189	ureter development	3/1210	20/28891	0.0491016	0.162269	0.118999	Six1/Lzts2/Sox9	3	GO_BP	up
GO:0097494	regulation of vesicle size	3/1210	20/28891	0.0491016	0.162269	0.118999	Snapin/Borcs8/Rab11a	3	GO_BP	up
GO:1901673	regulation of mitotic spindle assembly	3/1210	20/28891	0.0491016	0.162269	0.118999	Chmp4c/Chmp1b/Chmp5	3	GO_BP	up
GO:1902004	positive regulation of amyloid-beta formation	3/1210	20/28891	0.0491016	0.162269	0.118999	Clu/Gsk3a/Csnk1e	3	GO_BP	up
GO:1903789	regulation of amino acid transmembrane transport	3/1210	20/28891	0.0491016	0.162269	0.118999	Rgs4/Arg2/Arl6ip5	3	GO_BP	up
GO:1905564	positive regulation of vascular endothelial cell proliferation	3/1210	20/28891	0.0491016	0.162269	0.118999	Nrarp/Mdk/Col18a1	3	GO_BP	up
GO:0001941	postsynaptic membrane organization	5/1210	48/28891	0.049562	0.163594	0.11997	Sorbs2/Shisa6/Rer1/Snx27/Cript	5	GO_BP	up
GO:0043949	regulation of cAMP-mediated signaling	5/1210	48/28891	0.049562	0.163594	0.11997	Ece1/Nucb2/Cdc34/Ube2b/Pebp1	5	GO_BP	up
GO:0046661	male sex differentiation	13/1210	186/28891	0.049798	0.164273	0.120469	Nupr1/Rab13/Hmgb2/Rara/Cited2/Fkbp4/H3f3b/Adrm1/Eif2s2/Ybx3/Sox9/Tmf1/Bax	13	GO_BP	up
GO:0021537	telencephalon development	18/1210	281/28891	0.0498284	0.164275	0.12047	Rarb/Aldh1a3/Mdk/Phactr1/Hes1/Tubb2b/Tuba1a/Cdk5/Btg2/Nin/Lamb1/Mdga1/Rac1/Bax/Hdac2/Akirin2/Nfix/Rnf7	18	GO_BP	up
GO:2000514	regulation of CD4-positive, alpha-beta T cell activation	7/1210	80/28891	0.0502437	0.165544	0.121401	Cd24a/Arg2/Cd81/Cd274/Rara/Irf1/Socs1	7	GO_BP	up
GO:0007179	transforming growth factor beta receptor signaling pathway	14/1210	205/28891	0.0503828	0.165803	0.121591	Cav2/Hpgd/Got1/Lrp1/Gipc1/Cited2/Map3k1/Ing1/Sinhcaf/Suds3/Pin1/Stub1/Hspa5/Hdac2	14	GO_BP	up
GO:0030308	negative regulation of cell growth	14/1210	205/28891	0.0503828	0.165803	0.121591	Rgs4/Cdkn1a/Serpine2/Sema3f/Cdkn2c/Sertad1/Cdkn2d/Cdk5/Gsk3a/Ifrd1/Adipor1/Crlf3/Cdkn1b/Vgll4	14	GO_BP	up
GO:0045930	negative regulation of mitotic cell cycle	16/1210	243/28891	0.0505585	0.166236	0.121908	Cdkn1a/Nherf1/Rgcc/Fam107a/Ier3/Btg2/Cdk2ap2/Chmp4c/Zwint/Dync1li1/Timp2/Btg3/Rps27l/Crlf3/Cdkn1b/Syf2	16	GO_BP	up
GO:0007043	cell-cell junction assembly	12/1210	168/28891	0.0506054	0.166236	0.121908	Irx3/Ocln/Cdh24/Nedd4l/Cd9/Rab13/Ildr1/Cgn/Lsr/Rhoc/Actg1/Jup	12	GO_BP	up
GO:0046474	glycerophospholipid biosynthetic process	12/1210	168/28891	0.0506054	0.166236	0.121908	Pigf/Chpt1/Socs1/Becn1/Pip4k2c/Abhd5/Bpnt1/Cds1/Impa1/Slc27a1/Ptpmt1/Sh3glb1	12	GO_BP	up
GO:0051899	membrane depolarization	8/1210	97/28891	0.0507483	0.166406	0.122033	Dcn/Nedd4l/Got1/Scn1b/Mllt11/Ppp2r3c/Gclc/Gclm	8	GO_BP	up
GO:0061912	selective autophagy	8/1210	97/28891	0.0507483	0.166406	0.122033	Hspb8/Becn1/Vdac1/Ubqln1/Mapk3/Slc25a5/Uba5/Ufc1	8	GO_BP	up
GO:1903312	negative regulation of mRNA metabolic process	8/1210	97/28891	0.0507483	0.166406	0.122033	Celf4/Noct/Rbm20/Zfp36/Pcbp4/Srsf10/Srsf9/Rbm47	8	GO_BP	up
GO:0001841	neural tube formation	10/1210	132/28891	0.0509622	0.167007	0.122474	Rara/Lmo4/Cited2/Casp8/Coq7/St14/Vasp/Tmed2/Sdc4/Rala	10	GO_BP	up
GO:0043616	keratinocyte proliferation	6/1210	64/28891	0.0510614	0.167132	0.122565	Sfn/Cdkn1a/Irf6/Mdk/Zfp36/Ctsl	6	GO_BP	up
GO:0046173	polyol biosynthetic process	6/1210	64/28891	0.0510614	0.167132	0.122565	Sptssb/Got1/Ephx1/Qdpr/Pcbd2/Spr	6	GO_BP	up
GO:0051170	import into nucleus	13/1210	187/28891	0.0515638	0.168676	0.123697	Il33/Cdkn1a/Notch1/Prkcd/Sec13/Nfkbia/Ing1/Pttg1ip/Rab18/Ppp3r1/Akirin2/Jup/Hsp90ab1	13	GO_BP	up
GO:0002695	negative regulation of leukocyte activation	14/1210	206/28891	0.0520719	0.170236	0.124842	Dapl1/Cd24a/Arg2/Nrarp/Hspb1/Cd274/Cebpb/Mdk/Irf1/Socs1/Cx3cl1/Sdc4/Prkar1a/Prdx2	14	GO_BP	up
GO:0033673	negative regulation of kinase activity	15/1210	225/28891	0.0522264	0.170639	0.125137	Cdkn1a/Hspb1/Cdkn2c/Ubash3b/Trib1/Gadd45b/Gadd45a/Akt1s1/Prkcd/Tsg101/Dnajc3/Kat2b/Prkar1a/Cdkn1b/Pik3ip1	15	GO_BP	up
GO:0060512	prostate gland morphogenesis	4/1210	34/28891	0.0524339	0.170742	0.125213	Notch1/Mmp2/Serpinb5/Sox9	4	GO_BP	up
GO:0070293	renal absorption	4/1210	34/28891	0.0524339	0.170742	0.125213	Aqp3/Nherf1/Gsn/Stk39	4	GO_BP	up
GO:0071353	cellular response to interleukin-4	4/1210	34/28891	0.0524339	0.170742	0.125213	Alad/Hspa5/Rplp0/Hsp90ab1	4	GO_BP	up
GO:1904706	negative regulation of vascular associated smooth muscle cell proliferation	4/1210	34/28891	0.0524339	0.170742	0.125213	Cdkn1a/Ndrg2/Pdcd4/Cdkn1b	4	GO_BP	up
GO:0050000	chromosome localization	9/1210	115/28891	0.0524694	0.170742	0.125213	Racgap1/Becn1/Chmp4c/Chmp1b/Chmp5/Kat2b/Rrs1/Ube2b/Rab11a	9	GO_BP	up
GO:0051702	biological process involved in interaction with symbiont	9/1210	115/28891	0.0524694	0.170742	0.125213	Gpx2/Cav2/Cxcl1/Camp/Zfp639/Gapdh/Psmc3/Vapa/Hspd1	9	GO_BP	up
GO:0071219	cellular response to molecule of bacterial origin	20/1210	322/28891	0.0524761	0.170742	0.125213	Cxcl1/Spon2/Arid5a/Selenos/Cd274/Cxcl10/Cebpb/Trib1/Rara/Zfp36/Paf1/Nfkbia/Chmp5/Cx3cl1/Nfkb1/Prdx2/Pdcd4/Mapk3/Hadhb/Mif	20	GO_BP	up
GO:0031397	negative regulation of protein ubiquitination	7/1210	81/28891	0.0531	0.172529	0.126523	Fyn/Bag5/Cdk5/Gclc/Sox4/Bex3/Gtpbp4	7	GO_BP	up
GO:0051453	regulation of intracellular pH	7/1210	81/28891	0.0531	0.172529	0.126523	Aqp11/Tmem199/Rab20/Snapin/Clic4/Rnasek/Atp6v0c	7	GO_BP	up
GO:0006766	vitamin metabolic process	8/1210	98/28891	0.053326	0.172529	0.126523	Nqo1/Mmadhc/Gclc/Nfkb1/Cbr1/Pltp/Pdzd11/Akr1a1	8	GO_BP	up
GO:0006970	response to osmotic stress	8/1210	98/28891	0.053326	0.172529	0.126523	Aqp5/Efhd1/Nedd4l/Stk39/Ybx3/Rac1/Bax/Xrcc5	8	GO_BP	up
GO:0007044	cell-substrate junction assembly	8/1210	98/28891	0.053326	0.172529	0.126523	Fam107a/Fmn1/Lrp1/S100a10/Sdc4/Rac1/Actg1/Cttn	8	GO_BP	up
GO:0002931	response to ischemia	5/1210	49/28891	0.0533718	0.172529	0.126523	Aqp3/Nppc/Cib1/Cx3cl1/Stub1	5	GO_BP	up
GO:0014003	oligodendrocyte development	5/1210	49/28891	0.0533718	0.172529	0.126523	Clu/Nkx6-2/Eif2b3/Eif2b2/Tcf7l2	5	GO_BP	up
GO:0034205	amyloid-beta formation	5/1210	49/28891	0.0533718	0.172529	0.126523	Clu/Gsk3a/Pin1/Csnk1e/Bin1	5	GO_BP	up
GO:0035774	positive regulation of insulin secretion involved in cellular response to glucose stimulus	5/1210	49/28891	0.0533718	0.172529	0.126523	Lrp1/Osbp/Rac1/Kif5b/Dynll1	5	GO_BP	up
GO:1990089	response to nerve growth factor	5/1210	49/28891	0.0533718	0.172529	0.126523	Hes1/Cib1/Dync1li1/Nfkb1/Arf6	5	GO_BP	up
GO:1990090	cellular response to nerve growth factor stimulus	5/1210	49/28891	0.0533718	0.172529	0.126523	Hes1/Cib1/Dync1li1/Nfkb1/Arf6	5	GO_BP	up
GO:0017157	regulation of exocytosis	15/1210	226/28891	0.0538766	0.174058	0.127644	Rab3a/Nppc/Rapgef4/Atp13a2/Rab13/Notch1/Cdk5/Tsg101/Kcnh1/Rab15/S100a10/Sdc4/Snapin/Rala/Arf1	15	GO_BP	up
GO:1901990	regulation of mitotic cell cycle phase transition	21/1210	343/28891	0.0541463	0.174826	0.128208	Rad51b/Cdkn1a/Rgcc/Fam107a/Ccnd2/Cdkn2c/Cdkn2d/Ier3/Cdk2ap2/Chmp4c/Psme2/Zwint/Dync1li1/Tcf3/Smarcd2/Rps27l/Crlf3/Cdkn1b/Syf2/Rab11a/Anp32b	21	GO_BP	up
GO:0003170	heart valve development	6/1210	65/28891	0.0543508	0.175383	0.128616	Hey1/Jag1/Heyl/Notch1/Sox4/Sox9	6	GO_BP	up
GO:0045639	positive regulation of myeloid cell differentiation	9/1210	116/28891	0.0548702	0.176955	0.129769	Jag1/Ripk1/Hmgb2/Trib1/Casp8/Pithd1/Prmt1/Brd1/Smap1	9	GO_BP	up
GO:0030100	regulation of endocytosis	21/1210	344/28891	0.055498	0.177526	0.130188	Clu/Mctp1/Plk2/Nedd4l/Pick1/Lrp1/Rab4b/Tsg101/Actg1/Lyar/Snx3/Cd151/Flot1/Ppp3r1/Gas6/Bin1/Nr1h2/Rala/Arf1/Atg3/Smap1	21	GO_BP	up
GO:0000028	ribosomal small subunit assembly	3/1210	21/28891	0.0555588	0.177526	0.130188	Rps27l/Xrcc5/Mrps7	3	GO_BP	up
GO:0006658	phosphatidylserine metabolic process	3/1210	21/28891	0.0555588	0.177526	0.130188	Serinc5/Abhd12/Slc27a1	3	GO_BP	up
GO:0006833	water transport	3/1210	21/28891	0.0555588	0.177526	0.130188	Aqp5/Aqp3/Aqp11	3	GO_BP	up
GO:0009219	pyrimidine deoxyribonucleotide metabolic process	3/1210	21/28891	0.0555588	0.177526	0.130188	Upb1/Dut/Cmpk1	3	GO_BP	up
GO:0034377	plasma lipoprotein particle assembly	3/1210	21/28891	0.0555588	0.177526	0.130188	Ces1d/Nr1h2/Arf1	3	GO_BP	up
GO:0035234	ectopic germ cell programmed cell death	3/1210	21/28891	0.0555588	0.177526	0.130188	Ybx3/Bax/Ube2b	3	GO_BP	up
GO:0035994	response to muscle stretch	3/1210	21/28891	0.0555588	0.177526	0.130188	Gsn/Nfkbia/Nfkb1	3	GO_BP	up
GO:0045649	regulation of macrophage differentiation	3/1210	21/28891	0.0555588	0.177526	0.130188	Ripk1/Trib1/Casp8	3	GO_BP	up
GO:0048172	regulation of short-term neuronal synaptic plasticity	3/1210	21/28891	0.0555588	0.177526	0.130188	Rab3a/Syngr1/Shisa6	3	GO_BP	up
GO:0051770	positive regulation of nitric-oxide synthase biosynthetic process	3/1210	21/28891	0.0555588	0.177526	0.130188	Il33/Akap12/Fnta	3	GO_BP	up
GO:0051988	regulation of attachment of spindle microtubules to kinetochore	3/1210	21/28891	0.0555588	0.177526	0.130188	Racgap1/Becn1/Kat2b	3	GO_BP	up
GO:0070230	positive regulation of lymphocyte apoptotic process	3/1210	21/28891	0.0555588	0.177526	0.130188	Cd24a/Cd274/Bax	3	GO_BP	up
GO:0099509	regulation of presynaptic cytosolic calcium ion concentration	3/1210	21/28891	0.0555588	0.177526	0.130188	Marcksl1/Cdk5/Kcnh1	3	GO_BP	up
GO:0018205	peptidyl-lysine modification	15/1210	227/28891	0.0555625	0.177526	0.130188	H1f2/Dhps/Eef1akmt2/Eed/Kmt5a/Kat8/Ndufab1/Sox4/Kat2b/Taf10/Hdac2/Ube2i/Ruvbl1/Morf4l2/Hmg20b	15	GO_BP	up
GO:0006109	regulation of carbohydrate metabolic process	14/1210	208/28891	0.0555661	0.177526	0.130188	Pdk4/Nupr1/Dusp12/Zfp692/Ier3/Kat2b/Nfkb1/Mlx/Gfpt1/Adipor1/Zmpste24/Nfe2l1/Tcf7l2/Arpp19	14	GO_BP	up
GO:0010810	regulation of cell-substrate adhesion	15/1210	228/28891	0.0572842	0.181626	0.133194	Plet1/Fam107a/Jag1/Fmn1/Lrp1/Mdk/Notch1/Cib1/S100a10/Sdc4/Rac1/Actg1/Gfus/P4hb/Jup	15	GO_BP	up
GO:0001936	regulation of endothelial cell proliferation	11/1210	153/28891	0.0572847	0.181626	0.133194	Cav2/Pgf/F3/Nrarp/Ppp1r16b/Rgcc/Hmgb2/Mdk/Pdcl3/Nras/Col18a1	11	GO_BP	up
GO:0000038	very long-chain fatty acid metabolic process	4/1210	35/28891	0.0573156	0.181626	0.133194	Acot1/Hacd2/Elovl7/Elovl6	4	GO_BP	up
GO:0009651	response to salt stress	4/1210	35/28891	0.0573156	0.181626	0.133194	Efhd1/Nedd4l/Bax/Xrcc5	4	GO_BP	up
GO:0048714	positive regulation of oligodendrocyte differentiation	4/1210	35/28891	0.0573156	0.181626	0.133194	Il33/Nkx6-2/Mdk/Hdac2	4	GO_BP	up
GO:1901020	negative regulation of calcium ion transmembrane transporter activity	4/1210	35/28891	0.0573156	0.181626	0.133194	Ubqln1/1810037I17Rik/Calm3/Calm1	4	GO_BP	up
GO:0010906	regulation of glucose metabolic process	9/1210	117/28891	0.0573413	0.181626	0.133194	Pdk4/Dusp12/Zfp692/Kat2b/Adipor1/Zmpste24/Nfe2l1/Tcf7l2/Arpp19	9	GO_BP	up
GO:0030038	contractile actin filament bundle assembly	9/1210	117/28891	0.0573413	0.181626	0.133194	Kctd13/Rgcc/Phactr1/Rhoc/S100a10/Sdc4/Rac1/Actg1/Pdlim1	9	GO_BP	up
GO:0043149	stress fiber assembly	9/1210	117/28891	0.0573413	0.181626	0.133194	Kctd13/Rgcc/Phactr1/Rhoc/S100a10/Sdc4/Rac1/Actg1/Pdlim1	9	GO_BP	up
GO:0071482	cellular response to light stimulus	9/1210	117/28891	0.0573413	0.181626	0.133194	Rgs9/Cdkn1a/Mmp2/H2ac25/Prkcd/Rbx1/Trp53inp1/Bax/Eif2s1	9	GO_BP	up
GO:0009116	nucleoside metabolic process	5/1210	50/28891	0.0573469	0.181626	0.133194	Dera/Urah/Upb1/Pcmt1/Oard1	5	GO_BP	up
GO:0010837	regulation of keratinocyte proliferation	5/1210	50/28891	0.0573469	0.181626	0.133194	Sfn/Irf6/Mdk/Zfp36/Ctsl	5	GO_BP	up
GO:0042092	type 2 immune response	5/1210	50/28891	0.0573469	0.181626	0.133194	Il33/Arg2/Cd81/Rara/Irf1	5	GO_BP	up
GO:0090102	cochlea development	5/1210	50/28891	0.0573469	0.181626	0.133194	Six1/Hes1/Sox9/Rac1/Ift20	5	GO_BP	up
GO:1902459	positive regulation of stem cell population maintenance	5/1210	50/28891	0.0573469	0.181626	0.133194	Ing1/Sinhcaf/Ss18/Suds3/Hdac2	5	GO_BP	up
GO:0044270	cellular nitrogen compound catabolic process	26/1210	446/28891	0.057383	0.181635	0.133201	Dera/Urah/Carhsp1/Upb1/Isg20/Dnase2a/Noct/Rnaseh2a/Zfp36/Polr2g/Btg2/Pelo/Dut/Pcbp4/Eloc/Nudt3/Ttc5/Mrto4/Trir/Nudt18/Pnrc1/Bax/Cnot6/Rbm7/Lsm1/Rbm47	26	GO_BP	up
GO:0010927	cellular component assembly involved in morphogenesis	10/1210	135/28891	0.0576651	0.182212	0.133624	Krt19/Nectin2/Nebl/Cd9/Neurl2/Krt8/Prkar1a/Actg1/Tmf1/Hdac2	10	GO_BP	up
GO:0046822	regulation of nucleocytoplasmic transport	10/1210	135/28891	0.0576651	0.182212	0.133624	Sfn/Cdk5/Ier3/Prkcd/Rbm4/Chchd4/Gas6/Jup/Hsp90ab1/Anp32b	10	GO_BP	up
GO:0090090	negative regulation of canonical Wnt signaling pathway	10/1210	135/28891	0.0576651	0.182212	0.133624	Nherf1/Mdk/Notch1/Shisa6/Gsk3a/Lzts2/Sox9/Hdac2/Tcf7l2/Csnk1a1	10	GO_BP	up
GO:0009123	nucleoside monophosphate metabolic process	6/1210	66/28891	0.0577655	0.182214	0.133626	Urah/Upb1/Dut/Nudt2/Ak2/Gmpr	6	GO_BP	up
GO:0010662	regulation of striated muscle cell apoptotic process	6/1210	66/28891	0.0577655	0.182214	0.133626	Fbxo32/Nupr1/Acot1/Mdk/Nfe2l2/Pcmt1	6	GO_BP	up
GO:0033344	cholesterol efflux	6/1210	66/28891	0.0577655	0.182214	0.133626	Ces1d/Ces1b/Lrp1/Nfkbia/Nr1h2/Pltp	6	GO_BP	up
GO:0071560	cellular response to transforming growth factor beta stimulus	16/1210	248/28891	0.0586049	0.184756	0.135489	Cav2/Fyn/Hpgd/Got1/Lrp1/Gipc1/Cited2/Map3k1/Ing1/Sinhcaf/Sox9/Suds3/Pin1/Stub1/Hspa5/Hdac2	16	GO_BP	up
GO:0035418	protein localization to synapse	8/1210	100/28891	0.0587292	0.184935	0.135621	Gpc6/Rapgef4/Hspb1/Hras/Cdk5/Kif5b/Snap47/Rab11a	8	GO_BP	up
GO:0071774	response to fibroblast growth factor	8/1210	100/28891	0.0587292	0.184935	0.135621	Fgf1/Shisa2/Zfp36/Ier2/Churc1/Dstyk/Tcf7l2/Grb2	8	GO_BP	up
GO:0018394	peptidyl-lysine acetylation	7/1210	83/28891	0.0591123	0.185927	0.136348	Kat8/Sox4/Kat2b/Taf10/Hdac2/Ruvbl1/Morf4l2	7	GO_BP	up
GO:0033209	tumor necrosis factor-mediated signaling pathway	7/1210	83/28891	0.0591123	0.185927	0.136348	Ripk1/Krt18/Nfkbia/Krt8/Nkiras1/Gas6/Rraga	7	GO_BP	up
GO:1903037	regulation of leukocyte cell-cell adhesion	24/1210	407/28891	0.0593366	0.186525	0.136787	Dapl1/Cd24a/Arg2/Nrarp/Bmi1/Cd81/Hspb1/Cd274/Cebpb/H2-DMb1/Mdk/Dhps/Rara/Hes1/Irf1/Socs1/Sox4/Sdc4/Il7/Prkar1a/Prdx2/Smarcd2/Hspd1/Selenok	24	GO_BP	up
GO:0045446	endothelial cell differentiation	9/1210	118/28891	0.059883	0.188135	0.137968	Stc1/Ppp1r16b/Hey1/Jag1/Ccm2/Notch1/Ezr/Clic4/Col18a1	9	GO_BP	up
GO:0046467	membrane lipid biosynthetic process	10/1210	136/28891	0.0600215	0.188462	0.138207	Sgms2/Sptssb/Pigf/Hacd2/Elovl7/Cers2/Osbp/Prkcd/Elovl6/Vapa	10	GO_BP	up
GO:0032675	regulation of interleukin-6 production	12/1210	173/28891	0.0605359	0.189192	0.138742	Il33/Cd24a/Grk2/Spon2/Arid5a/Selenos/Cebpb/Bsg/Gas6/Hspd1/Akirin2/Selenok	12	GO_BP	up
GO:0019932	second-messenger-mediated signaling	20/1210	328/28891	0.061042	0.189192	0.138742	Cd24a/Ece1/Atp1b1/Nppc/Edn2/Tmem38a/Nucb2/Cib1/Cap1/Sox9/Tmbim4/Gapdh/Ppp3r1/Cdc34/Ube2b/Zmpste24/Bcap31/Pebp1/Fis1/Selenok	20	GO_BP	up
GO:0031589	cell-substrate adhesion	22/1210	368/28891	0.0610992	0.189192	0.138742	Plet1/Nid2/Fam107a/Tnfrsf12a/Jag1/Fmn1/Lrp1/Akip1/Mdk/Notch1/Cib1/Cdk5/Lamb1/S100a10/Sdc4/Rac1/Actg1/Gfus/Gas6/P4hb/Cttn/Jup	22	GO_BP	up
GO:1901987	regulation of cell cycle phase transition	26/1210	449/28891	0.0611275	0.189192	0.138742	Tcim/Rad51b/Cdkn1a/Prpf19/Rgcc/Fam107a/Ccnd2/Cdkn2c/Paf1/Cdkn2d/Ier3/Cdk2ap2/Chmp4c/Psme2/Zwint/Tiprl/Dync1li1/Tcf3/Smarcd2/Rps27l/Crlf3/Cdkn1b/Syf2/Rab11a/Ddx39b/Anp32b	26	GO_BP	up
GO:0001836	release of cytochrome c from mitochondria	6/1210	67/28891	0.0613057	0.189192	0.138742	Sfn/Mllt11/Bax/Ghitm/Mcl1/Fis1	6	GO_BP	up
GO:0002861	regulation of inflammatory response to antigenic stimulus	6/1210	67/28891	0.0613057	0.189192	0.138742	Gpx2/Cd24a/Cd81/Selenos/Psmb4/Psma1	6	GO_BP	up
GO:0043331	response to dsRNA	6/1210	67/28891	0.0613057	0.189192	0.138742	Nfkbia/Slc3a2/Nfkb1/Mapk3/Flot1/Ralb	6	GO_BP	up
GO:0061337	cardiac conduction	6/1210	67/28891	0.0613057	0.189192	0.138742	Irx3/Scn1b/Dsc2/Bin1/Zmpste24/Jup	6	GO_BP	up
GO:0070059	intrinsic apoptotic signaling pathway in response to endoplasmic reticulum stress	6/1210	67/28891	0.0613057	0.189192	0.138742	Selenos/Cebpb/Tmbim6/Bax/Atf4/Selenok	6	GO_BP	up
GO:0098930	axonal transport	6/1210	67/28891	0.0613057	0.189192	0.138742	Hspb1/Bloc1s4/Arl8a/Snapin/Kif5b/Actr10	6	GO_BP	up
GO:1901016	regulation of potassium ion transmembrane transporter activity	6/1210	67/28891	0.0613057	0.189192	0.138742	Atp1b1/Nedd4l/Pick1/Stk39/Atp1b3/Snx27	6	GO_BP	up
GO:0007520	myoblast fusion	5/1210	51/28891	0.0614872	0.189192	0.138742	Gdf15/Cd81/Cd9/Cxcl10/Flot1	5	GO_BP	up
GO:0045646	regulation of erythrocyte differentiation	5/1210	51/28891	0.0614872	0.189192	0.138742	Hmgb2/Zfp36/Prmt1/Brd1/Smap1	5	GO_BP	up
GO:0097300	programmed necrotic cell death	5/1210	51/28891	0.0614872	0.189192	0.138742	Nupr1/Ripk1/Casp8/Ybx3/Bax	5	GO_BP	up
GO:0010717	regulation of epithelial to mesenchymal transition	8/1210	101/28891	0.0615556	0.189192	0.138742	Zfp750/Rgcc/Jag1/Mdk/Notch1/Adipor1/Hdac2/Tcf7l2	8	GO_BP	up
GO:0002067	glandular epithelial cell differentiation	7/1210	84/28891	0.0622691	0.189192	0.138742	Rarb/Nkx6-2/Rara/Notch1/Hes1/Rbm4/Sox9	7	GO_BP	up
GO:0062012	regulation of small molecule metabolic process	23/1210	389/28891	0.0623177	0.189192	0.138742	Ces1d/Ces1b/Pdk4/Nupr1/Fgf1/Nucb2/Dusp12/Zfp692/Ier3/Sox9/Kat2b/Nfkb1/Mlx/Ndufc2/Adipor1/Zmpste24/Lacc1/Nr1h2/Nfe2l1/Comt/Tcf7l2/Fis1/Arpp19	23	GO_BP	up
GO:0006541	glutamine metabolic process	3/1210	22/28891	0.0623974	0.189192	0.138742	Ucp2/Glul/Gfpt1	3	GO_BP	up
GO:0006654	phosphatidic acid biosynthetic process	3/1210	22/28891	0.0623974	0.189192	0.138742	Abhd5/Slc27a1/Sh3glb1	3	GO_BP	up
GO:0009151	purine deoxyribonucleotide metabolic process	3/1210	22/28891	0.0623974	0.189192	0.138742	Urah/Nudt18/Ak2	3	GO_BP	up
GO:0009164	nucleoside catabolic process	3/1210	22/28891	0.0623974	0.189192	0.138742	Dera/Urah/Upb1	3	GO_BP	up
GO:0020027	hemoglobin metabolic process	3/1210	22/28891	0.0623974	0.189192	0.138742	Alas1/Slc25a37/Snx3	3	GO_BP	up
GO:0035751	regulation of lysosomal lumen pH	3/1210	22/28891	0.0623974	0.189192	0.138742	Tmem199/Snapin/Atp6v0c	3	GO_BP	up
GO:0043374	CD8-positive, alpha-beta T cell differentiation	3/1210	22/28891	0.0623974	0.189192	0.138742	Irf1/Socs1/Pax1	3	GO_BP	up
GO:0045056	transcytosis	3/1210	22/28891	0.0623974	0.189192	0.138742	Lrp1/Uso1/Rab11a	3	GO_BP	up
GO:0048486	parasympathetic nervous system development	3/1210	22/28891	0.0623974	0.189192	0.138742	Sema3f/Six1/Hes1	3	GO_BP	up
GO:0048532	anatomical structure arrangement	3/1210	22/28891	0.0623974	0.189192	0.138742	Sema3f/Rac1/Hspa5	3	GO_BP	up
GO:0060009	Sertoli cell development	3/1210	22/28891	0.0623974	0.189192	0.138742	Rab13/Adrm1/Sox9	3	GO_BP	up
GO:0060438	trachea development	3/1210	22/28891	0.0623974	0.189192	0.138742	Rara/Sox9/Mapk3	3	GO_BP	up
GO:0060602	branch elongation of an epithelium	3/1210	22/28891	0.0623974	0.189192	0.138742	Fgf1/Six1/Sox9	3	GO_BP	up
GO:0071397	cellular response to cholesterol	3/1210	22/28891	0.0623974	0.189192	0.138742	Ces1d/Ces1b/Nfe2l1	3	GO_BP	up
GO:0072273	metanephric nephron morphogenesis	3/1210	22/28891	0.0623974	0.189192	0.138742	Fmn1/Hes1/Sox9	3	GO_BP	up
GO:0072537	fibroblast activation	3/1210	22/28891	0.0623974	0.189192	0.138742	Rgcc/Cygb/Gclc	3	GO_BP	up
GO:0090205	positive regulation of cholesterol metabolic process	3/1210	22/28891	0.0623974	0.189192	0.138742	Ces1d/Ces1b/Fgf1	3	GO_BP	up
GO:1902254	negative regulation of intrinsic apoptotic signaling pathway by p53 class mediator	3/1210	22/28891	0.0623974	0.189192	0.138742	Pttg1ip/Mif/Sh3glb1	3	GO_BP	up
GO:1902992	negative regulation of amyloid precursor protein catabolic process	3/1210	22/28891	0.0623974	0.189192	0.138742	Clu/Pin1/Bin1	3	GO_BP	up
GO:0000387	spliceosomal snRNP assembly	4/1210	36/28891	0.0624318	0.189192	0.138742	Prpf19/Clns1a/Snrpc/Snrpd3	4	GO_BP	up
GO:0048384	retinoic acid receptor signaling pathway	4/1210	36/28891	0.0624318	0.189192	0.138742	Rarb/Aldh1a3/Rara/Nr1h2	4	GO_BP	up
GO:0070670	response to interleukin-4	4/1210	36/28891	0.0624318	0.189192	0.138742	Alad/Hspa5/Rplp0/Hsp90ab1	4	GO_BP	up
GO:0086091	regulation of heart rate by cardiac conduction	4/1210	36/28891	0.0624318	0.189192	0.138742	Scn1b/Dsc2/Bin1/Jup	4	GO_BP	up
GO:0090075	relaxation of muscle	4/1210	36/28891	0.0624318	0.189192	0.138742	Atp1b1/Nppc/Grk2/Gsn	4	GO_BP	up
GO:0006090	pyruvate metabolic process	10/1210	137/28891	0.0624395	0.189192	0.138742	Pdk4/Nupr1/Ucp2/Ier3/Vdac1/Kat2b/Gapdh/Mlx/Pdhb/Mpc1	10	GO_BP	up
GO:0050769	positive regulation of neurogenesis	20/1210	329/28891	0.0625588	0.189192	0.138742	Il33/Crabp2/Serpine2/Nkx6-2/Prpf19/Tnfrsf12a/Sgk1/Lrp1/Mdk/Notch1/Hes1/Gdi1/Nin/Cx3cl1/Stk25/Eif2b2/Bin1/Hdac2/Xrcc5/Sh3glb1	20	GO_BP	up
GO:0048660	regulation of smooth muscle cell proliferation	13/1210	193/28891	0.0630601	0.189192	0.138742	Cdkn1a/Grk2/Ndrg2/Hpgd/Trib1/Mmp2/Cx3cl1/Pdcd4/Cdkn1b/Comt/Xrcc5/Tcf7l2/Ddx39b	13	GO_BP	up
GO:0000050	urea cycle	2/1210	10/28891	0.0630869	0.189192	0.138742	Arg2/Cebpa	2	GO_BP	up
GO:0001731	formation of translation preinitiation complex	2/1210	10/28891	0.0630869	0.189192	0.138742	Eif2s2/Eif5	2	GO_BP	up
GO:0002424	T cell mediated immune response to tumor cell	2/1210	10/28891	0.0630869	0.189192	0.138742	Cd24a/Hspd1	2	GO_BP	up
GO:0002840	regulation of T cell mediated immune response to tumor cell	2/1210	10/28891	0.0630869	0.189192	0.138742	Cd24a/Hspd1	2	GO_BP	up
GO:0006563	L-serine metabolic process	2/1210	10/28891	0.0630869	0.189192	0.138742	Psph/Psat1	2	GO_BP	up
GO:0006971	hypotonic response	2/1210	10/28891	0.0630869	0.189192	0.138742	Aqp5/Stk39	2	GO_BP	up
GO:0007128	meiotic prophase I	2/1210	10/28891	0.0630869	0.189192	0.138742	Ube2b/Xrcc5	2	GO_BP	up
GO:0009221	pyrimidine deoxyribonucleotide biosynthetic process	2/1210	10/28891	0.0630869	0.189192	0.138742	Dut/Cmpk1	2	GO_BP	up
GO:0010728	regulation of hydrogen peroxide biosynthetic process	2/1210	10/28891	0.0630869	0.189192	0.138742	Duoxa1/Fyn	2	GO_BP	up
GO:0010745	negative regulation of macrophage derived foam cell differentiation	2/1210	10/28891	0.0630869	0.189192	0.138742	Nfkbia/Hbp1	2	GO_BP	up
GO:0019852	L-ascorbic acid metabolic process	2/1210	10/28891	0.0630869	0.189192	0.138742	Gclc/Akr1a1	2	GO_BP	up
GO:0021957	corticospinal tract morphogenesis	2/1210	10/28891	0.0630869	0.189192	0.138742	Scn1b/Nin	2	GO_BP	up
GO:0030070	insulin processing	2/1210	10/28891	0.0630869	0.189192	0.138742	Hsp90b1/P4hb	2	GO_BP	up
GO:0030853	negative regulation of granulocyte differentiation	2/1210	10/28891	0.0630869	0.189192	0.138742	Trib1/Rara	2	GO_BP	up
GO:0033152	immunoglobulin V(D)J recombination	2/1210	10/28891	0.0630869	0.189192	0.138742	Polb/Tcf3	2	GO_BP	up
GO:0034351	negative regulation of glial cell apoptotic process	2/1210	10/28891	0.0630869	0.189192	0.138742	Prkcd/Gas6	2	GO_BP	up
GO:0034379	very-low-density lipoprotein particle assembly	2/1210	10/28891	0.0630869	0.189192	0.138742	Ces1d/Arf1	2	GO_BP	up
GO:0035360	positive regulation of peroxisome proliferator activated receptor signaling pathway	2/1210	10/28891	0.0630869	0.189192	0.138742	Cited2/Stard10	2	GO_BP	up
GO:0044857	plasma membrane raft organization	2/1210	10/28891	0.0630869	0.189192	0.138742	Cav2/Flot1	2	GO_BP	up
GO:0046719	regulation by virus of viral protein levels in host cell	2/1210	10/28891	0.0630869	0.189192	0.138742	Dynlt1f/Dynlt1c	2	GO_BP	up
GO:0051324	prophase	2/1210	10/28891	0.0630869	0.189192	0.138742	Ube2b/Xrcc5	2	GO_BP	up
GO:0051775	response to redox state	2/1210	10/28891	0.0630869	0.189192	0.138742	Selenos/Adh5	2	GO_BP	up
GO:0060136	embryonic process involved in female pregnancy	2/1210	10/28891	0.0630869	0.189192	0.138742	Cited2/Junb	2	GO_BP	up
GO:0062042	regulation of cardiac epithelial to mesenchymal transition	2/1210	10/28891	0.0630869	0.189192	0.138742	Jag1/Notch1	2	GO_BP	up
GO:0070086	ubiquitin-dependent endocytosis	2/1210	10/28891	0.0630869	0.189192	0.138742	Sh3kbp1/Tsg101	2	GO_BP	up
GO:0071481	cellular response to X-ray	2/1210	10/28891	0.0630869	0.189192	0.138742	Ccnd2/Xrcc5	2	GO_BP	up
GO:0072017	distal tubule development	2/1210	10/28891	0.0630869	0.189192	0.138742	Jag1/Notch1	2	GO_BP	up
GO:0072070	loop of Henle development	2/1210	10/28891	0.0630869	0.189192	0.138742	Irx3/Jag1	2	GO_BP	up
GO:0072173	metanephric tubule morphogenesis	2/1210	10/28891	0.0630869	0.189192	0.138742	Hes1/Sox9	2	GO_BP	up
GO:0075509	endocytosis involved in viral entry into host cell	2/1210	10/28891	0.0630869	0.189192	0.138742	Cav2/Rnasek	2	GO_BP	up
GO:0090084	negative regulation of inclusion body assembly	2/1210	10/28891	0.0630869	0.189192	0.138742	Dnajb1/Dnajb6	2	GO_BP	up
GO:0106104	regulation of glutamate receptor clustering	2/1210	10/28891	0.0630869	0.189192	0.138742	Shisa6/Snx27	2	GO_BP	up
GO:0120188	regulation of bile acid secretion	2/1210	10/28891	0.0630869	0.189192	0.138742	Ces1d/Ces1b	2	GO_BP	up
GO:1901334	lactone metabolic process	2/1210	10/28891	0.0630869	0.189192	0.138742	Gclc/Akr1a1	2	GO_BP	up
GO:1902047	polyamine transmembrane transport	2/1210	10/28891	0.0630869	0.189192	0.138742	Atp13a2/Oaz1	2	GO_BP	up
GO:1903799	negative regulation of miRNA processing	2/1210	10/28891	0.0630869	0.189192	0.138742	Bcdin3d/Zmpste24	2	GO_BP	up
GO:1904717	regulation of AMPA glutamate receptor clustering	2/1210	10/28891	0.0630869	0.189192	0.138742	Shisa6/Snx27	2	GO_BP	up
GO:2001269	positive regulation of cysteine-type endopeptidase activity involved in apoptotic signaling pathway	2/1210	10/28891	0.0630869	0.189192	0.138742	Gsn/Bax	2	GO_BP	up
GO:0009798	axis specification	8/1210	102/28891	0.0644657	0.193221	0.141697	Stc1/Nrarp/Pcsk6/Hey1/Notch1/Rnf2/Cited2/Tmed2	8	GO_BP	up
GO:0050727	regulation of inflammatory response	24/1210	411/28891	0.0647562	0.193572	0.141955	Gpx2/Il33/Cd24a/Duoxa1/Cd81/Nupr1/Selenos/Cebpb/Ripk1/Mdk/Nlrp4e/Cebpa/Zfp36/Ier3/Nfkbia/Stk39/Psmb4/Abhd12/Cx3cl1/Nfkb1/Pdcd4/Psma1/Lacc1/Nfe2l1	24	GO_BP	up
GO:0051168	nuclear export	12/1210	175/28891	0.0648462	0.193572	0.141955	Sfn/Cdk5/Chchd4/Eif4e/Thoc7/Gas6/Cdkn1b/Sarnp/Ube2i/Ddx39b/Eny2/Anp32b	12	GO_BP	up
GO:0000086	G2/M transition of mitotic cell cycle	10/1210	138/28891	0.0649196	0.193572	0.141955	Rad51b/Cdkn1a/Ier3/Chmp4c/Bach1/Calm3/Syf2/Calm1/Rab11a/Arpp19	10	GO_BP	up
GO:0046425	regulation of receptor signaling pathway via JAK-STAT	10/1210	138/28891	0.0649196	0.193572	0.141955	Notch1/Hes1/Gadd45a/Irf1/Cdk5/Socs1/Rac1/Adipor1/Crlf3/Calm1	10	GO_BP	up
GO:0001655	urogenital system development	6/1210	68/28891	0.0649717	0.193572	0.141955	Notch1/Mmp2/Fkbp4/Serpinb5/Sox9/Cdkn1b	6	GO_BP	up
GO:0003229	ventricular cardiac muscle tissue development	6/1210	68/28891	0.0649717	0.193572	0.141955	Irx3/Hey1/Notch1/Zmpste24/Ly6e/Fkbp1a	6	GO_BP	up
GO:0010656	negative regulation of muscle cell apoptotic process	6/1210	68/28891	0.0649717	0.193572	0.141955	Nupr1/Acot1/Mdk/Gapdh/Nfe2l2/Pcmt1	6	GO_BP	up
GO:0030837	negative regulation of actin filament polymerization	6/1210	68/28891	0.0649717	0.193572	0.141955	Capg/Gsn/Prkcd/Twf1/Capzb/Mtpn	6	GO_BP	up
GO:0032233	positive regulation of actin filament bundle assembly	6/1210	68/28891	0.0649717	0.193572	0.141955	Rgcc/Rhoc/S100a10/Cx3cl1/Sdc4/Rac1	6	GO_BP	up
GO:0032720	negative regulation of tumor necrosis factor production	6/1210	68/28891	0.0649717	0.193572	0.141955	Cd24a/Arg2/Selenos/Rara/Cx3cl1/Gas6	6	GO_BP	up
GO:0061045	negative regulation of wound healing	6/1210	68/28891	0.0649717	0.193572	0.141955	Plat/Serpine2/Cd9/Ubash3b/Prkcd/Anxa5	6	GO_BP	up
GO:0007051	spindle organization	13/1210	194/28891	0.0651292	0.193936	0.142221	Plk2/Racgap1/Chmp4c/Chmp1b/Ezr/Dctn6/Chmp5/Gtf2b/Tubb5/Ranbp1/Mzt1/Rab11a/Sugt1	13	GO_BP	up
GO:0050890	cognition	22/1210	371/28891	0.0654519	0.19479	0.142848	Rtl4/Plk2/Nr4a2/Fam107a/Adrb1/Ccnd2/Sgk1/Mdk/Man2b1/Tuba1a/Slc1a4/Cdk5/Btg2/Lamb1/Vdac1/Arl6ip5/Vdac3/Ndufs4/Comt/Ift20/Nfix/Paip2	22	GO_BP	up
GO:0060411	cardiac septum morphogenesis	7/1210	85/28891	0.0655268	0.194832	0.142879	Hey1/Jag1/Heyl/Notch1/Hes1/Cited2/Sox4	7	GO_BP	up
GO:0007411	axon guidance	16/1210	252/28891	0.0656438	0.194832	0.142879	Ece1/Isl2/Efna4/B3gnt2/Sema3f/Lrp1/Notch1/Lmo4/Scn1b/Tubb2b/Cdk5/Vasp/Rac1/Bsg/Kif5b/Flot1	16	GO_BP	up
GO:0071559	response to transforming growth factor beta	16/1210	252/28891	0.0656438	0.194832	0.142879	Cav2/Fyn/Hpgd/Got1/Lrp1/Gipc1/Cited2/Map3k1/Ing1/Sinhcaf/Sox9/Suds3/Pin1/Stub1/Hspa5/Hdac2	16	GO_BP	up
GO:0097485	neuron projection guidance	16/1210	252/28891	0.0656438	0.194832	0.142879	Ece1/Isl2/Efna4/B3gnt2/Sema3f/Lrp1/Notch1/Lmo4/Scn1b/Tubb2b/Cdk5/Vasp/Rac1/Bsg/Kif5b/Flot1	16	GO_BP	up
GO:0099173	postsynapse organization	16/1210	252/28891	0.0656438	0.194832	0.142879	Sorbs2/Fyn/Rapgef4/Sema3f/Pick1/Cdk5/Shisa6/Ezr/Rer1/Rac1/Arf6/Arf1/Cttn/Snx27/Cript/Septin7	16	GO_BP	up
GO:0010762	regulation of fibroblast migration	5/1210	52/28891	0.0657921	0.194955	0.142969	Nherf1/Cygb/Akap12/Sdc4/Rac1	5	GO_BP	up
GO:0031146	SCF-dependent proteasomal ubiquitin-dependent protein catabolic process	5/1210	52/28891	0.0657921	0.194955	0.142969	Fbxo9/Amn1/Skp1/Fbxo6/Rbx1	5	GO_BP	up
GO:0043666	regulation of phosphoprotein phosphatase activity	5/1210	52/28891	0.0657921	0.194955	0.142969	Ppp1r2/Tiprl/Hsp90b1/Calm3/Calm1	5	GO_BP	up
GO:0030705	cytoskeleton-dependent intracellular transport	14/1210	214/28891	0.0669981	0.198422	0.145511	Hspb1/Bloc1s4/Ssx2ip/Tuba1a/Arl8a/Snapin/Ccdc186/Kif5b/Ift43/Borcs8/Copg1/Actr10/Ift20/Dynll1	14	GO_BP	up
GO:0051494	negative regulation of cytoskeleton organization	12/1210	176/28891	0.067075	0.198542	0.145599	Capg/Sgk1/Pick1/Gsn/Cib1/Fkbp4/Prkcd/Map3k1/Kat2b/Twf1/Capzb/Mtpn	12	GO_BP	up
GO:0006661	phosphatidylinositol biosynthetic process	8/1210	103/28891	0.0674597	0.199573	0.146355	Pigf/Socs1/Becn1/Pip4k2c/Bpnt1/Cds1/Impa1/Slc27a1	8	GO_BP	up
GO:0001953	negative regulation of cell-matrix adhesion	4/1210	37/28891	0.0677799	0.200196	0.146812	Plet1/Fam107a/Jag1/Lrp1	4	GO_BP	up
GO:0006775	fat-soluble vitamin metabolic process	4/1210	37/28891	0.0677799	0.200196	0.146812	Nqo1/Nfkb1/Cbr1/Pltp	4	GO_BP	up
GO:0039532	negative regulation of viral-induced cytoplasmic pattern recognition receptor signaling pathway	4/1210	37/28891	0.0677799	0.200196	0.146812	Ufd1/Ubqln1/Lamp2/Csnk1a1	4	GO_BP	up
GO:0042440	pigment metabolic process	6/1210	69/28891	0.0687633	0.202554	0.148542	Cyp2a5/Alas1/Alad/Gipc1/Snx3/Cpox	6	GO_BP	up
GO:0048524	positive regulation of viral process	6/1210	69/28891	0.0687633	0.202554	0.148542	Tmprss2/Notch1/Map3k1/Tsg101/Bsg/P4hb	6	GO_BP	up
GO:0070613	regulation of protein processing	6/1210	69/28891	0.0687633	0.202554	0.148542	Plat/Serpine2/Timm17a/Gsn/S100a10/Plgrkt	6	GO_BP	up
GO:0071868	cellular response to monoamine stimulus	6/1210	69/28891	0.0687633	0.202554	0.148542	Cav2/Gnao1/Rgs4/Rgs9/Nherf1/Gna11	6	GO_BP	up
GO:0071870	cellular response to catecholamine stimulus	6/1210	69/28891	0.0687633	0.202554	0.148542	Cav2/Gnao1/Rgs4/Rgs9/Nherf1/Gna11	6	GO_BP	up
GO:0070663	regulation of leukocyte proliferation	19/1210	313/28891	0.0688647	0.202744	0.148681	Il33/Cd24a/Arg2/Cdkn1a/Bmi1/Cd81/Cd274/Cebpb/H2-DMb1/Dhps/Hes1/Irf1/Sdc4/Tcf3/Il7/Prkar1a/Mapk3/Mif/Selenok	19	GO_BP	up
GO:0000070	mitotic sister chromatid segregation	12/1210	177/28891	0.0693531	0.203176	0.148998	Racgap1/Becn1/Chmp4c/Chmp1b/Chmp5/Zwint/Dync1li1/Kat2b/Rrs1/Smc4/Mzt1/Rab11a	12	GO_BP	up
GO:0006740	NADPH regeneration	3/1210	23/28891	0.0696053	0.203176	0.148998	Tkt/Taldo1/Pgls	3	GO_BP	up
GO:0010880	regulation of release of sequestered calcium ion into cytosol by sarcoplasmic reticulum	3/1210	23/28891	0.0696053	0.203176	0.148998	Tmem38a/Calm3/Calm1	3	GO_BP	up
GO:0010885	regulation of cholesterol storage	3/1210	23/28891	0.0696053	0.203176	0.148998	Ces1d/Ces1b/Nr1h2	3	GO_BP	up
GO:0031649	heat generation	3/1210	23/28891	0.0696053	0.203176	0.148998	Adrb1/Arrdc3/Slc27a1	3	GO_BP	up
GO:0038128	ERBB2 signaling pathway	3/1210	23/28891	0.0696053	0.203176	0.148998	Hras/Mapk3/Grb2	3	GO_BP	up
GO:0048670	regulation of collateral sprouting	3/1210	23/28891	0.0696053	0.203176	0.148998	Crabp2/Lrp1/Ifrd1	3	GO_BP	up
GO:0051602	response to electrical stimulus	3/1210	23/28891	0.0696053	0.203176	0.148998	Trim63/Rab3a/Fbxo32	3	GO_BP	up
GO:0060544	regulation of necroptotic process	3/1210	23/28891	0.0696053	0.203176	0.148998	Ripk1/Casp8/Ybx3	3	GO_BP	up
GO:0061311	cell surface receptor signaling pathway involved in heart development	3/1210	23/28891	0.0696053	0.203176	0.148998	Hey1/Jag1/Notch1	3	GO_BP	up
GO:0071359	cellular response to dsRNA	3/1210	23/28891	0.0696053	0.203176	0.148998	Nfkb1/Flot1/Ralb	3	GO_BP	up
GO:0072079	nephron tubule formation	3/1210	23/28891	0.0696053	0.203176	0.148998	Irx3/Six1/Sox9	3	GO_BP	up
GO:0098801	regulation of renal system process	3/1210	23/28891	0.0696053	0.203176	0.148998	Stc1/Nherf1/Gas6	3	GO_BP	up
GO:0098974	postsynaptic actin cytoskeleton organization	3/1210	23/28891	0.0696053	0.203176	0.148998	Ezr/Rac1/Arf1	3	GO_BP	up
GO:0099188	postsynaptic cytoskeleton organization	3/1210	23/28891	0.0696053	0.203176	0.148998	Ezr/Rac1/Arf1	3	GO_BP	up
GO:2001026	regulation of endothelial cell chemotaxis	3/1210	23/28891	0.0696053	0.203176	0.148998	Hspb1/Fgf1/Notch1	3	GO_BP	up
GO:0033559	unsaturated fatty acid metabolic process	10/1210	140/28891	0.0700669	0.204415	0.149906	Cyp2f2/Cyp2g1/Cyp2a5/Ces2c/Edn2/Hpgd/Ephx1/Prxl2b/Mif/Gpx4	10	GO_BP	up
GO:0008089	anterograde axonal transport	5/1210	53/28891	0.0702609	0.204654	0.150081	Hspb1/Bloc1s4/Arl8a/Snapin/Kif5b	5	GO_BP	up
GO:0009161	ribonucleoside monophosphate metabolic process	5/1210	53/28891	0.0702609	0.204654	0.150081	Urah/Upb1/Nudt2/Ak2/Gmpr	5	GO_BP	up
GO:0046148	pigment biosynthetic process	5/1210	53/28891	0.0702609	0.204654	0.150081	Alas1/Alad/Gipc1/Snx3/Cpox	5	GO_BP	up
GO:0007160	cell-matrix adhesion	15/1210	235/28891	0.070362	0.204839	0.150217	Plet1/Nid2/Fam107a/Jag1/Fmn1/Lrp1/Cib1/Cdk5/S100a10/Sdc4/Rac1/Actg1/Gfus/Cttn/Jup	15	GO_BP	up
GO:0003007	heart morphogenesis	18/1210	294/28891	0.0704103	0.204871	0.150241	Hey1/Jag1/Six1/Heyl/Rbm20/Notch1/Hes1/Cited2/Gsk3a/Tmed2/Sox4/Sox9/Rac1/Pim1/Pdcd4/Zmpste24/Ly6e/Fkbp1a	18	GO_BP	up
GO:0007173	epidermal growth factor receptor signaling pathway	8/1210	104/28891	0.0705379	0.205001	0.150336	Garem1/Tsg101/Rnf126/Sox9/Snx5/Rala/Ralb/Grb2	8	GO_BP	up
GO:0010586	miRNA metabolic process	8/1210	104/28891	0.0705379	0.205001	0.150336	Hras/Klf5/Rara/Eloc/Sox9/Nfkb1/Nr1h2/Hdac2	8	GO_BP	up
GO:0001818	negative regulation of cytokine production	19/1210	314/28891	0.0705673	0.205001	0.150336	Il33/Cd24a/Arg2/Ndrg2/Selenos/Rgcc/Cd274/Trib2/Chid1/Rara/Zfp36/Ufd1/Ezr/Cx3cl1/Rac1/Nfkb1/Pdcd4/Rbx1/Gas6	19	GO_BP	up
GO:0042180	cellular ketone metabolic process	16/1210	255/28891	0.0712828	0.206969	0.15178	Ces1d/Ces1b/Pdk4/Srd5a1/Nucb2/Nqo1/Hagh/Coq7/Sox9/Kat2b/Cbr1/Pnkd/Nr1h2/Nfe2l1/Comt/Akr1a1	16	GO_BP	up
GO:0043200	response to amino acid	13/1210	197/28891	0.071604	0.207792	0.152383	Cdo1/Fyn/Cebpb/Six1/Tmbim6/Mmp2/Nqo1/Tuba1a/Socs1/Rbx1/Rraga/Lamtor3/Lamtor2	13	GO_BP	up
GO:0034103	regulation of tissue remodeling	7/1210	87/28891	0.0723453	0.209832	0.153879	Cd24a/Pdk4/Lrp1/Ubash3b/Mdk/Klf6/Suco	7	GO_BP	up
GO:0006334	nucleosome assembly	6/1210	70/28891	0.0726804	0.210358	0.154265	H3c15/H1f2/Nap1l4/Sox9/Set/Anp32b	6	GO_BP	up
GO:0006801	superoxide metabolic process	6/1210	70/28891	0.0726804	0.210358	0.154265	Cxcl1/Nqo1/Prkcd/Prdx2/Nfe2l2/Prdx1	6	GO_BP	up
GO:0046427	positive regulation of receptor signaling pathway via JAK-STAT	6/1210	70/28891	0.0726804	0.210358	0.154265	Notch1/Hes1/Socs1/Adipor1/Crlf3/Calm1	6	GO_BP	up
GO:0090307	mitotic spindle assembly	6/1210	70/28891	0.0726804	0.210358	0.154265	Racgap1/Chmp4c/Chmp1b/Chmp5/Mzt1/Rab11a	6	GO_BP	up
GO:0045727	positive regulation of translation	10/1210	141/28891	0.0727346	0.210404	0.154298	Serp1/Polr2g/Dnajc3/Rbm4/Sox4/Prmt1/Mapk3/Rps27l/Ddx39b/Eef2	10	GO_BP	up
GO:0009167	purine ribonucleoside monophosphate metabolic process	4/1210	38/28891	0.0733566	0.211211	0.15489	Urah/Nudt2/Ak2/Gmpr	4	GO_BP	up
GO:0045746	negative regulation of Notch signaling pathway	4/1210	38/28891	0.0733566	0.211211	0.15489	Tcim/Nrarp/Hey1/Nfkbia	4	GO_BP	up
GO:0071364	cellular response to epidermal growth factor stimulus	4/1210	38/28891	0.0733566	0.211211	0.15489	Grk2/Garem1/Zfp36/Sox9	4	GO_BP	up
GO:0090140	regulation of mitochondrial fission	4/1210	38/28891	0.0733566	0.211211	0.15489	Dcn/Ralbp1/Rala/Fis1	4	GO_BP	up
GO:0051101	regulation of DNA binding	9/1210	123/28891	0.0736632	0.211211	0.15489	Hey1/Hmgb2/Hes1/Gtf2b/Zmpste24/Taf10/Hdac2/Calm1/Edf1	9	GO_BP	up
GO:1902106	negative regulation of leukocyte differentiation	9/1210	123/28891	0.0736632	0.211211	0.15489	Nrarp/Hspb1/Ubash3b/Mdk/Trib1/Rara/Irf1/Socs1/Prdx2	9	GO_BP	up
GO:0090068	positive regulation of cell cycle process	17/1210	276/28891	0.07376	0.211211	0.15489	Rad51b/Rgcc/Racgap1/Ccnd2/Gipc1/Paf1/Becn1/Dync1li1/Kat2b/Smc4/Ranbp1/Nsfl1c/Ube2b/Pebp1/Rab11a/Ddx39b/Anp32b	17	GO_BP	up
GO:0015804	neutral amino acid transport	5/1210	54/28891	0.0748925	0.211211	0.15489	Rgs4/Slc1a4/Slc3a2/Sfxn1/Nfe2l1	5	GO_BP	up
GO:0021795	cerebral cortex cell migration	5/1210	54/28891	0.0748925	0.211211	0.15489	Cdk5/Lamb1/Mdga1/Rac1/Rnf7	5	GO_BP	up
GO:0031018	endocrine pancreas development	5/1210	54/28891	0.0748925	0.211211	0.15489	Clu/Nkx6-2/Hes1/Sox4/Sox9	5	GO_BP	up
GO:0035088	establishment or maintenance of apical/basal cell polarity	5/1210	54/28891	0.0748925	0.211211	0.15489	Nherf1/Ezr/Pdzd11/Ift20/Lin7c	5	GO_BP	up
GO:0061245	establishment or maintenance of bipolar cell polarity	5/1210	54/28891	0.0748925	0.211211	0.15489	Nherf1/Ezr/Pdzd11/Ift20/Lin7c	5	GO_BP	up
GO:0000101	sulfur amino acid transport	2/1210	11/28891	0.0750191	0.211211	0.15489	Slc3a2/Nfe2l1	2	GO_BP	up
GO:0000338	protein deneddylation	2/1210	11/28891	0.0750191	0.211211	0.15489	Cops7a/Cops4	2	GO_BP	up
GO:0002357	defense response to tumor cell	2/1210	11/28891	0.0750191	0.211211	0.15489	Dapk1/Prdx2	2	GO_BP	up
GO:0003418	growth plate cartilage chondrocyte differentiation	2/1210	11/28891	0.0750191	0.211211	0.15489	Nppc/Sox9	2	GO_BP	up
GO:0005513	detection of calcium ion	2/1210	11/28891	0.0750191	0.211211	0.15489	Calm3/Calm1	2	GO_BP	up
GO:0006558	L-phenylalanine metabolic process	2/1210	11/28891	0.0750191	0.211211	0.15489	Qdpr/Spr	2	GO_BP	up
GO:0008611	ether lipid biosynthetic process	2/1210	11/28891	0.0750191	0.211211	0.15489	Peds1/Chpt1	2	GO_BP	up
GO:0010807	regulation of synaptic vesicle priming	2/1210	11/28891	0.0750191	0.211211	0.15489	Rab3a/Napa	2	GO_BP	up
GO:0010898	positive regulation of triglyceride catabolic process	2/1210	11/28891	0.0750191	0.211211	0.15489	Pnpla2/Abhd5	2	GO_BP	up
GO:0017062	respiratory chain complex III assembly	2/1210	11/28891	0.0750191	0.211211	0.15489	Uqcc6/Uqcc4	2	GO_BP	up
GO:0018401	peptidyl-proline hydroxylation to 4-hydroxy-L-proline	2/1210	11/28891	0.0750191	0.211211	0.15489	Egln2/P4hb	2	GO_BP	up
GO:0019627	urea metabolic process	2/1210	11/28891	0.0750191	0.211211	0.15489	Arg2/Cebpa	2	GO_BP	up
GO:0021520	spinal cord motor neuron cell fate specification	2/1210	11/28891	0.0750191	0.211211	0.15489	Isl2/Lmo4	2	GO_BP	up
GO:0031943	regulation of glucocorticoid metabolic process	2/1210	11/28891	0.0750191	0.211211	0.15489	Atp1a1/Stub1	2	GO_BP	up
GO:0032225	regulation of synaptic transmission, dopaminergic	2/1210	11/28891	0.0750191	0.211211	0.15489	Flot1/Pnkd	2	GO_BP	up
GO:0032353	negative regulation of hormone biosynthetic process	2/1210	11/28891	0.0750191	0.211211	0.15489	Atp1a1/Nfkb1	2	GO_BP	up
GO:0034551	mitochondrial respiratory chain complex III assembly	2/1210	11/28891	0.0750191	0.211211	0.15489	Uqcc6/Uqcc4	2	GO_BP	up
GO:0042118	endothelial cell activation	2/1210	11/28891	0.0750191	0.211211	0.15489	Tcim/Cxcl10	2	GO_BP	up
GO:0042182	ketone catabolic process	2/1210	11/28891	0.0750191	0.211211	0.15489	Hagh/Pnkd	2	GO_BP	up
GO:0043353	enucleate erythrocyte differentiation	2/1210	11/28891	0.0750191	0.211211	0.15489	Dnase2a/Cebpg	2	GO_BP	up
GO:0044417	translocation of molecules into host	2/1210	11/28891	0.0750191	0.211211	0.15489	Thoc7/Ddx39b	2	GO_BP	up
GO:0046504	glycerol ether biosynthetic process	2/1210	11/28891	0.0750191	0.211211	0.15489	Peds1/Chpt1	2	GO_BP	up
GO:0046784	viral mRNA export from host cell nucleus	2/1210	11/28891	0.0750191	0.211211	0.15489	Thoc7/Ddx39b	2	GO_BP	up
GO:0051561	positive regulation of mitochondrial calcium ion concentration	2/1210	11/28891	0.0750191	0.211211	0.15489	Bcap31/Fis1	2	GO_BP	up
GO:0051639	actin filament network formation	2/1210	11/28891	0.0750191	0.211211	0.15489	Pls1/Arpc5	2	GO_BP	up
GO:0051643	endoplasmic reticulum localization	2/1210	11/28891	0.0750191	0.211211	0.15489	Zbed3/Vapa	2	GO_BP	up
GO:0060159	regulation of dopamine receptor signaling pathway	2/1210	11/28891	0.0750191	0.211211	0.15489	Cav2/Rgs4	2	GO_BP	up
GO:0060717	chorion development	2/1210	11/28891	0.0750191	0.211211	0.15489	Tmed2/Dnajb6	2	GO_BP	up
GO:0060768	regulation of epithelial cell proliferation involved in prostate gland development	2/1210	11/28891	0.0750191	0.211211	0.15489	Notch1/Cdkn1b	2	GO_BP	up
GO:0071941	nitrogen cycle metabolic process	2/1210	11/28891	0.0750191	0.211211	0.15489	Arg2/Cebpa	2	GO_BP	up
GO:0086100	endothelin receptor signaling pathway	2/1210	11/28891	0.0750191	0.211211	0.15489	Six1/Gna11	2	GO_BP	up
GO:0099640	axo-dendritic protein transport	2/1210	11/28891	0.0750191	0.211211	0.15489	Hspb1/Kif5b	2	GO_BP	up
GO:1900147	regulation of Schwann cell migration	2/1210	11/28891	0.0750191	0.211211	0.15489	Lrp1/Cers2	2	GO_BP	up
GO:1901339	regulation of store-operated calcium channel activity	2/1210	11/28891	0.0750191	0.211211	0.15489	Stim2/Ubqln1	2	GO_BP	up
GO:1901526	positive regulation of mitophagy	2/1210	11/28891	0.0750191	0.211211	0.15489	Vdac1/Slc25a5	2	GO_BP	up
GO:1902221	erythrose 4-phosphate/phosphoenolpyruvate family amino acid metabolic process	2/1210	11/28891	0.0750191	0.211211	0.15489	Qdpr/Spr	2	GO_BP	up
GO:1903911	positive regulation of receptor clustering	2/1210	11/28891	0.0750191	0.211211	0.15489	Cd81/Snx27	2	GO_BP	up
GO:1904587	response to glycoprotein	2/1210	11/28891	0.0750191	0.211211	0.15489	Nppc/Fbxo6	2	GO_BP	up
GO:1905150	regulation of voltage-gated sodium channel activity	2/1210	11/28891	0.0750191	0.211211	0.15489	Scn1b/Kif5b	2	GO_BP	up
GO:1990440	positive regulation of transcription from RNA polymerase II promoter in response to endoplasmic reticulum stress	2/1210	11/28891	0.0750191	0.211211	0.15489	Cebpb/Atf4	2	GO_BP	up
GO:0006401	RNA catabolic process	18/1210	297/28891	0.0758702	0.212942	0.156159	Carhsp1/Isg20/Noct/Rnaseh2a/Zfp36/Polr2g/Btg2/Pelo/Pcbp4/Eloc/Ttc5/Mrto4/Trir/Pnrc1/Cnot6/Rbm7/Lsm1/Rbm47	18	GO_BP	up
GO:0003151	outflow tract morphogenesis	7/1210	88/28891	0.0759061	0.212942	0.156159	Hey1/Jag1/Six1/Heyl/Notch1/Hes1/Cited2	7	GO_BP	up
GO:0003281	ventricular septum development	7/1210	88/28891	0.0759061	0.212942	0.156159	Hey1/Heyl/Notch1/Lmo4/Hes1/Cited2/Sox4	7	GO_BP	up
GO:0032784	regulation of DNA-templated transcription elongation	7/1210	88/28891	0.0759061	0.212942	0.156159	Med31/Med30/Med7/Leo1/Med28/Med19/Ddx39b	7	GO_BP	up
GO:0046785	microtubule polymerization	7/1210	88/28891	0.0759061	0.212942	0.156159	Sgk1/Fkbp4/Tuba1a/Nin/Rac1/Mzt1/Cdkn1b	7	GO_BP	up
GO:0072384	organelle transport along microtubule	7/1210	88/28891	0.0759061	0.212942	0.156159	Bloc1s4/Tuba1a/Snapin/Kif5b/Borcs8/Copg1/Actr10	7	GO_BP	up
GO:2000628	regulation of miRNA metabolic process	7/1210	88/28891	0.0759061	0.212942	0.156159	Hras/Klf5/Rara/Sox9/Nfkb1/Nr1h2/Hdac2	7	GO_BP	up
GO:0006633	fatty acid biosynthetic process	11/1210	161/28891	0.07632	0.213993	0.15693	Olah/Pdk4/Edn2/Hacd2/Elovl7/Prxl2b/Elovl6/Ndufab1/Kat2b/Mif/Nr1h2	11	GO_BP	up
GO:0015718	monocarboxylic acid transport	12/1210	180/28891	0.076486	0.214349	0.157191	Ces1d/Crabp2/Ces1b/Nherf1/Pla2g12a/Slc25a17/Stard10/Crot/Slc27a1/Mif/Mpc1/Fis1	12	GO_BP	up
GO:0046777	protein autophosphorylation	15/1210	238/28891	0.0765272	0.214353	0.157195	Fyn/Pim3/Atp13a2/Dapk1/Ripk1/Cdk5/Prkcd/Map3k1/Stk39/Pim1/Stk25/Mapk3/Mob1b/Csnk2a1/Eif2s1	15	GO_BP	up
GO:0001885	endothelial cell development	6/1210	71/28891	0.0767225	0.214353	0.157195	Stc1/Ppp1r16b/Ccm2/Ezr/Clic4/Col18a1	6	GO_BP	up
GO:0046324	regulation of glucose import	6/1210	71/28891	0.0767225	0.214353	0.157195	Ocln/Grk2/Capn10/Prkcd/Gsk3a/Nfe2l2	6	GO_BP	up
GO:0060612	adipose tissue development	6/1210	71/28891	0.0767225	0.214353	0.157195	Selenom/Creb5/Hras/Tbl1xr1/Arrdc3/Adrm1	6	GO_BP	up
GO:0098900	regulation of action potential	6/1210	71/28891	0.0767225	0.214353	0.157195	Rapgef4/Dsc2/Bin1/Calm3/Calm1/Jup	6	GO_BP	up
GO:0140115	export across plasma membrane	6/1210	71/28891	0.0767225	0.214353	0.157195	Atp1b1/Rgs9/Atp1a1/Atp1b3/Ralbp1/Slc27a1	6	GO_BP	up
GO:0006063	uronic acid metabolic process	3/1210	24/28891	0.0771696	0.214364	0.157202	Cryl1/Akr1a1/Dcxr	3	GO_BP	up
GO:0008090	retrograde axonal transport	3/1210	24/28891	0.0771696	0.214364	0.157202	Snapin/Kif5b/Actr10	3	GO_BP	up
GO:0010738	regulation of protein kinase A signaling	3/1210	24/28891	0.0771696	0.214364	0.157202	Tcim/Akap12/Mif	3	GO_BP	up
GO:0019585	glucuronate metabolic process	3/1210	24/28891	0.0771696	0.214364	0.157202	Cryl1/Akr1a1/Dcxr	3	GO_BP	up
GO:0033033	negative regulation of myeloid cell apoptotic process	3/1210	24/28891	0.0771696	0.214364	0.157202	Selenos/Gas6/Mif	3	GO_BP	up
GO:0035634	response to stilbenoid	3/1210	24/28891	0.0771696	0.214364	0.157202	Cyp2a5/Ly6d/Gsta2	3	GO_BP	up
GO:0050872	white fat cell differentiation	3/1210	24/28891	0.0771696	0.214364	0.157202	Creb5/Tbl1xr1/Cebpa	3	GO_BP	up
GO:0051481	negative regulation of cytosolic calcium ion concentration	3/1210	24/28891	0.0771696	0.214364	0.157202	Got1/Lrp1/Tmbim6	3	GO_BP	up
GO:0150105	protein localization to cell-cell junction	3/1210	24/28891	0.0771696	0.214364	0.157202	Ildr1/Lsr/Actg1	3	GO_BP	up
GO:1901017	negative regulation of potassium ion transmembrane transporter activity	3/1210	24/28891	0.0771696	0.214364	0.157202	Nedd4l/Stk39/Snx27	3	GO_BP	up
GO:1904292	regulation of ERAD pathway	3/1210	24/28891	0.0771696	0.214364	0.157202	Aqp11/Ubqln1/Bcap31	3	GO_BP	up
GO:0002520	immune system development	16/1210	258/28891	0.0772352	0.214364	0.157202	Cd274/Polb/Six1/Lmo4/Hes1/Cited2/Adrm1/Ppp2r3c/Ltbr/Tcf3/Nfkb1/Prdx2/Mapk3/Zmpste24/Pax1/Hspd1	16	GO_BP	up
GO:0007249	canonical NF-kappaB signal transduction	16/1210	258/28891	0.0772352	0.214364	0.157202	Fyn/Hspb1/Ripk1/Irf1/Casp8/Nfkbia/Ltbr/Nkiras1/Trim8/Cx3cl1/Nfkb1/Gapdh/Rbx1/Ube2i/Ube2n/Zfand6	16	GO_BP	up
GO:0002757	immune response-activating signaling pathway	25/1210	440/28891	0.077287	0.214399	0.157228	Skint3/Fyb/Fyn/Cd81/Nectin2/Hras/Eif2b3/Ufd1/Irf1/Fyb2/Nfkbia/Ezr/Ubqln1/Nfkb1/Arf6/Eif2b2/Flot1/Nras/Bax/Lacc1/Hspd1/Ube2n/Grb2/Lamp2/Csnk1a1	25	GO_BP	up
GO:0048675	axon extension	10/1210	143/28891	0.0782589	0.216985	0.159125	Edn2/Tnfrsf12a/Sema3f/Lrp1/Gdi1/Cdk5/Ifrd1/Eif2b2/Cttn/Hsp90ab1	10	GO_BP	up
GO:0003205	cardiac chamber development	13/1210	200/28891	0.078484	0.217499	0.159502	Hey1/Jag1/Heyl/Lrp1/Notch1/Lmo4/Hes1/Cited2/Gsk3a/Sox4/Zmpste24/Ly6e/Fkbp1a	13	GO_BP	up
GO:0098773	skin epidermis development	11/1210	162/28891	0.0789491	0.218677	0.160366	Sfn/Prss8/Grhl1/Foxq1/Notch1/Lsr/Sox9/Ctsl/Slc39a7/Zmpste24/Hdac2	11	GO_BP	up
GO:0003203	endocardial cushion morphogenesis	4/1210	39/28891	0.0791582	0.218814	0.160466	Hey1/Heyl/Notch1/Sox9	4	GO_BP	up
GO:0060292	long-term synaptic depression	4/1210	39/28891	0.0791582	0.218814	0.160466	Plk2/Pick1/Abhd6/Arf1	4	GO_BP	up
GO:0060674	placenta blood vessel development	4/1210	39/28891	0.0791582	0.218814	0.160466	Hey1/Hes1/Tmed2/Junb	4	GO_BP	up
GO:1901661	quinone metabolic process	4/1210	39/28891	0.0791582	0.218814	0.160466	Nqo1/Coq7/Cbr1/Akr1a1	4	GO_BP	up
GO:0035019	somatic stem cell population maintenance	7/1210	89/28891	0.079568	0.219717	0.161128	Hes1/Med30/Med7/Sox4/Sox9/Med28/Tcf7l2	7	GO_BP	up
GO:0000956	nuclear-transcribed mRNA catabolic process	9/1210	125/28891	0.0796797	0.219717	0.161128	Noct/Zfp36/Polr2g/Btg2/Pelo/Mrto4/Pnrc1/Cnot6/Lsm1	9	GO_BP	up
GO:0030834	regulation of actin filament depolymerization	5/1210	55/28891	0.0796856	0.219717	0.161128	Capg/Gsn/Twf1/Capzb/Mtpn	5	GO_BP	up
GO:0046854	phosphatidylinositol phosphate biosynthetic process	5/1210	55/28891	0.0796856	0.219717	0.161128	Socs1/Becn1/Pip4k2c/Bpnt1/Impa1	5	GO_BP	up
GO:0050853	B cell receptor signaling pathway	5/1210	55/28891	0.0796856	0.219717	0.161128	Cd81/Nfkbia/Nfkb1/Bax/Grb2	5	GO_BP	up
GO:0001505	regulation of neurotransmitter levels	14/1210	220/28891	0.0798924	0.220176	0.161465	Rab3a/Sncaip/Mctp1/Napa/Kcnh1/Snapin/Arl6ip5/Flot1/Pnkd/Stx11/Snap47/Pdzd11/Pebp1/Lin7c	14	GO_BP	up
GO:0002437	inflammatory response to antigenic stimulus	8/1210	107/28891	0.0802788	0.22113	0.162164	Gpx2/Cd24a/Cd81/Selenos/Hmgb2/Notch1/Psmb4/Psma1	8	GO_BP	up
GO:0009952	anterior/posterior pattern specification	15/1210	240/28891	0.0808274	0.222141	0.162906	Meox1/Nrarp/Bmi1/Pcsk6/Hey1/Heyl/Notch1/Hes1/Rnf2/Btg2/Dmrt2/Tmed2/Taf10/Pax1/Abi1	15	GO_BP	up
GO:0030595	leukocyte chemotaxis	15/1210	240/28891	0.0808274	0.222141	0.162906	Cxcl1/Pla2g7/Pgf/Edn2/Cxcl10/Mdk/Mmp2/Stk39/Cx3cl1/Rac1/Akirin1/Bsg/Mapk3/Gas6/Mif	15	GO_BP	up
GO:0097553	calcium ion transmembrane import into cytosol	13/1210	201/28891	0.0808682	0.222141	0.162906	Fyn/Tmem38a/Cxcl10/Adrb1/Ubash3b/Tmbim6/Cx3cl1/Ppp3r1/Bax/Calm3/Ghitm/Calm1/Fkbp1a	13	GO_BP	up
GO:0009166	nucleotide catabolic process	6/1210	72/28891	0.0808892	0.222141	0.162906	Dera/Urah/Upb1/Dut/Nudt3/Nudt18	6	GO_BP	up
GO:0071867	response to monoamine	6/1210	72/28891	0.0808892	0.222141	0.162906	Cav2/Gnao1/Rgs4/Rgs9/Nherf1/Gna11	6	GO_BP	up
GO:0071869	response to catecholamine	6/1210	72/28891	0.0808892	0.222141	0.162906	Cav2/Gnao1/Rgs4/Rgs9/Nherf1/Gna11	6	GO_BP	up
GO:0006606	protein import into nucleus	12/1210	182/28891	0.0814916	0.223571	0.163955	Il33/Cdkn1a/Notch1/Prkcd/Sec13/Nfkbia/Ing1/Pttg1ip/Ppp3r1/Akirin2/Jup/Hsp90ab1	12	GO_BP	up
GO:0032635	interleukin-6 production	12/1210	182/28891	0.0814916	0.223571	0.163955	Il33/Cd24a/Grk2/Spon2/Arid5a/Selenos/Cebpb/Bsg/Gas6/Hspd1/Akirin2/Selenok	12	GO_BP	up
GO:0008217	regulation of blood pressure	14/1210	221/28891	0.0821862	0.225364	0.165269	Ece1/Edn2/Nedd4l/Manf/Adrb1/Ier3/Gsk3a/Stk39/Atp1a1/Rnpep/Gas6/Snx5/Gna11/Adh5	14	GO_BP	up
GO:0051054	positive regulation of DNA metabolic process	19/1210	321/28891	0.0832829	0.228045	0.167235	Hras/Rgcc/Cct7/Prkcd/Rac1/Cebpg/Smarcd2/Mapk3/Bax/Ube2b/Cct2/Tcp1/Ube2n/Xrcc5/Ruvbl1/Morf4l2/Cct6a/Ddx39b/Cct8	19	GO_BP	up
GO:0070665	positive regulation of leukocyte proliferation	13/1210	202/28891	0.0832979	0.228045	0.167235	Cd24a/Cdkn1a/Bmi1/Cd81/Cd274/H2-DMb1/Dhps/Hes1/Tcf3/Il7/Mapk3/Mif/Selenok	13	GO_BP	up
[truncated: 3,477 more rows]

## Sheet: TEC Progenitors
ID	Description	GeneRatio	BgRatio	pvalue	p.adjust	qvalue	geneID	Count	Cluster	Direction
GO:0048193	Golgi vesicle transport	69/1852	281/28891	1.29686e-22	7.7578e-19	4.80793e-19	Cnst/Trappc6b/Copz2/Lman1/Sec13/Rab6a/Ier3ip1/Tmed7/Vamp2/Trappc4/Yipf4/Trappc2l/Ergic2/Gabarapl2/Yif1a/Rab8b/Copb1/Arf1/Sar1b/Creb3l2/Bicd2/Kdelr2/Rer1/Sec23a/Gas1/Gosr1/Trip11/Cog4/Yipf6/Golt1b/Rab13/Tmed4/Tmed2/Trappc2/Kif16b/Acsl3/Atp2c1/Golga5/Copg1/Chic2/Ap1ar/Lman2/Uso1/Pitpnb/Sar1a/Tmed1/Sorl1/Trappc1/Dnm2/Gga2/Ap3s1/Tfg/Rab14/Rab12/Erp29/Stx6/Yif1b/Vapa/Golga4/Arl1/Cope/Cul3/Copg2/Vti1b/…	69	GO_BP	up
GO:0006888	endoplasmic reticulum to Golgi vesicle-mediated transport	43/1852	124/28891	8.03584e-21	2.40352e-17	1.48959e-17	Trappc6b/Lman1/Sec13/Ier3ip1/Tmed7/Trappc4/Yipf4/Trappc2l/Ergic2/Yif1a/Copb1/Arf1/Sar1b/Creb3l2/Kdelr2/Sec23a/Gas1/Gosr1/Trip11/Yipf6/Golt1b/Tmed4/Tmed2/Trappc2/Copg1/Lman2/Uso1/Sar1a/Tmed1/Sorl1/Trappc1/Tfg/Erp29/Yif1b/Vapa/Cope/Cul3/Copg2/Rab1a/Mia2/Bcap31/Vcp/Tmed10	43	GO_BP	up
GO:0007015	actin filament organization	88/1852	471/28891	7.8864e-20	1.40275e-16	8.69361e-17	Rgs4/Arhgap28/Fam107a/Tac1/Kctd13/Rflnb/Nebl/Fam171a1/Rgcc/Pls1/Gas7/Tpm2/F2rl1/Sh3kbp1/Tpm1/Iqgap2/Sema5a/Actg1/Limch1/Cald1/Hsp90b1/Gsn/Tagln2/Capg/Sdc4/Rhoc/Map3k1/Rnh1/Cdc42ep2/Ptk2b/Vasp/Twf1/Sirpa/Cobl/Capza2/Arf1/Mtpn/Actr2/Arpc1a/Evl/Tpm4/Inpp5k/Arpc1b/Fhod3/Gmfb/Cnn3/Svil/Limd2/Marcksl1/Cttn/Pfn1/Rock2/Arpc5/Ap1ar/Grb2/Naa80/Nck2/Cdc42/Pak2/Wdr1/Arpc5l/Flna/Actn4/Fat1/Myo1d/Arpc3/Wnt4/Db…	88	GO_BP	up
GO:1904951	positive regulation of establishment of protein localization	75/1852	362/28891	9.37982e-20	1.40275e-16	8.69361e-17	Chrm3/Camk2n1/Unc13b/Tgfb2/Rapgef4/F2rl1/Cnst/Hras/Tmem30b/Acsl4/Tmem30a/Kif5b/Glul/Tsg101/Osbp/Sfn/Cep290/Prkar1a/Ier3ip1/Cct7/Vamp2/Cct2/C1qtnf12/Tgfb1/App/Vsnl1/Bsg/Sh3glb1/Arf1/Abat/Serp1/Sar1b/Gna11/Edem1/Frmd4a/Wls/Cdk5/Acsl3/Tcp1/Atp2c1/Itpr1/Atp13a2/Chp1/Dynll1/Hyal2/Cdc42/Sar1a/Ywhae/Flna/Sorl1/Psmd9/Cct6a/Oaz1/Tcf7l2/Gsk3a/Anp32b/Arpc2/Cd2ap/Mff/Prkcd/Ppia/Fis1/Cd81/Pdcd10/Rac1/Hsp90ab1…	75	GO_BP	up
GO:0031346	positive regulation of cell projection organization	86/1852	463/28891	3.06754e-19	3.14531e-16	1.94932e-16	Bdnf/Ngfr/Dnm3/Ddr2/Tnfrsf12a/Crabp2/Atp8a2/F2rl1/Hras/Gdi1/Cd24a/Prom2/Tmem30a/Bmp4/Sema5a/Epha4/Ilk/Itga6/Mdk/Mien1/Sgk1/Gprc5b/Skil/Map1b/Cdc42ep2/Dynlt1f/Obsl1/Adamts1/Ptk2b/Rab21/Twf1/Cobl/Akirin1/Vldlr/Fxn/Rab8b/Epha3/Sh3glb1/Actr2/Creb3l2/Dynlt1c/Nptn/Wls/Atf1/Tapt1/Plce1/Pfn1/Kat2b/Kalrn/Ube2v2/Itpr1/Dynll1/Rala/Cdc42/Fam98a/Ift20/Trak1/Flna/Ddr1/Dnm2/Picalm/Stk25/Nme2/Tox/Hnrnpk/Ptprd/Nm…	86	GO_BP	up
GO:0034976	response to endoplasmic reticulum stress	62/1852	266/28891	3.15478e-19	3.14531e-16	1.94932e-16	Thbs1/Selenos/Clu/Manf/Rnf5/Jkamp/Nfe2l1/Hsp90b1/Derl1/Uba5/Dnajc3/Faf2/Amfr/Bax/Get4/Ube2g2/App/Atf6b/Serp1/Ccdc47/Ufd1/Sec61b/Parp8/Edem1/Tmed2/Creb3/Niban1/Flot1/Ppp2cb/Derl2/Ddit3/Gorasp2/Tmem33/Nrbf2/Tmx1/Itpr1/Bag6/Ubxn6/Tmbim6/Nck2/Erlec1/Erp29/Pdia4/Lpcat3/Psmc6/Hspa5/H13/Canx/Pdia3/Eif2s1/Tmem258/Fis1/Ufc1/Nfe2l2/Cert1/Serinc3/Stub1/Bcap31/Vcp/Selenok/Park7/Spop	62	GO_BP	up
GO:2001233	regulation of apoptotic signaling pathway	81/1852	437/28891	3.86688e-18	3.30453e-15	2.04799e-15	Bdnf/Traf1/Thbs1/Tgfb2/Ngfr/Tnfrsf12a/Selenos/Dapk2/Deptor/Clu/Eef1e1/Bmi1/Gclc/G0s2/Pea15a/Casp8/Bmp4/Itga6/Vdac2/Tmem14a/Hdac2/Cth/Pam16/Ctsl/Skil/Tmem161a/Bmpr1b/Bax/Nherf1/App/Fxn/Mapk8ip1/Slc25a4/Sh3glb1/Bag5/Ltbr/Becn1/Gas1/Timp3/Pdcd7/Creb3/Il7/Cttn/Ddit3/Hdac1/Prdx2/Tmbim6/Mif/Hyal2/Nck2/Itgav/Pak2/Rrm2b/Tcf7l2/Ghitm/Sod2/Hmgb2/Erp29/Hnrnpk/Cxcl12/Eya2/Wnt4/Slc25a5/Prkcd/Ppia/Pdia3/Cx3cl1…	81	GO_BP	up
GO:0051222	positive regulation of protein transport	70/1852	346/28891	6.09075e-18	4.55436e-15	2.82258e-15	Chrm3/Camk2n1/Unc13b/Tgfb2/Rapgef4/F2rl1/Cnst/Hras/Tmem30b/Acsl4/Tmem30a/Kif5b/Glul/Tsg101/Osbp/Sfn/Cep290/Prkar1a/Ier3ip1/Vamp2/C1qtnf12/Tgfb1/App/Vsnl1/Bsg/Sh3glb1/Arf1/Abat/Serp1/Sar1b/Gna11/Edem1/Frmd4a/Wls/Cdk5/Acsl3/Atp2c1/Itpr1/Atp13a2/Chp1/Dynll1/Hyal2/Cdc42/Sar1a/Ywhae/Flna/Sorl1/Psmd9/Oaz1/Tcf7l2/Gsk3a/Anp32b/Arpc2/Cd2ap/Mff/Prkcd/Ppia/Fis1/Cd81/Pdcd10/Rac1/Hsp90ab1/Bcap31/Gnaq/Tnfrsf1a…	70	GO_BP	up
GO:0072594	establishment of protein localization to organelle	82/1852	452/28891	9.1221e-18	6.06315e-15	3.75766e-15	Fgf9/Cdkn1a/Clu/Timm17a/Sh3kbp1/Bmp4/Srpr/Il33/Sec62/Nup88/Tomm20/Srp14/Tsg101/Fam53b/Sec13/Wbp2/Cct7/Pmpcb/Pam16/Cct2/Ncoa4/Tnpo2/Bax/Get4/Tgfb1/Tomm22/Rab8b/Vps36/Sh3glb1/Becn1/Ppp3r1/Spcs1/Tomm34/Spcs2/Spcs3/Sec61b/Edem1/Srprb/Traf3ip2/Tcp1/Ddit3/Srp68/Cbl/Notch1/Sec61a1/Bag6/Srp19/Vps4a/Srp9/Chp1/Ppp3ca/Hspd1/Hyal2/Rala/Hspa4/Ywhaz/Flna/Ssr3/Sorl1/Cct6a/Tomm40/Rab11a/Gsk3a/Hspa5/Akirin2/Pex2/…	82	GO_BP	up
GO:0090150	establishment of protein localization to membrane	60/1852	270/28891	1.37007e-17	8.19574e-15	5.07934e-15	Cnst/Hras/Gdi1/Cd24a/Zdhhc4/Srpr/Zdhhc21/Emc4/Sec62/Srp14/Vamp2/Bax/Get4/Tomm22/Emc7/Rab8b/Sh3glb1/Snx27/Atp6ap1/Ccdc47/Sec61b/Inpp5k/Srprb/Cdk5/Acsl3/Gorasp2/Srp68/Atp2c1/Sec61a1/Bag6/Srp19/Sacm1l/Srp9/Emc6/Snap47/Micall1/Tmem147/Hspa4/Ssr3/Sorl1/Gga2/Tomm40/Rab11a/Hspa5/Yif1b/Arpc2/Mff/Golga4/Mtch1/Fis1/Srp72/Rab5if/Pard3/Sec61g/Chmp4b/Naca/Wdr83os/Ndufa13/Arl6ip1/Rab11b	60	GO_BP	up
GO:0009060	aerobic respiration	50/1852	196/28891	1.64275e-17	8.93359e-15	5.53663e-15	Bdnf/Mdh2/Cycs/Cox7a2/Pdhb/Idh1/Ndufs5/Fxn/Uqcrfs1/Cox6a1/Ndufa6/Coq7/Uqcrc2/Cyc1/Ndufab1/Idh2/Ndufc1/Uqcrc1/Ndufs1/Aco2/Atp5pb/Sdhb/Idh3a/Ndufa11/Ndufa8/Cox8a/Ndufs4/Uqcrb/Ndufb1/Antkmt/Ndufb7/Ndufv2/Cox5a/Rhoa/Cox5b/Sdhd/Cox7c/Ndufb6/Vcp/Chchd2/Ndufc2/Ndufb9/Ndufa7/Ndufa13/Park7/Ndufb11/Ndufb10/Mdh1/Hif1a/Cox4i1	50	GO_BP	up
GO:0006119	oxidative phosphorylation	42/1852	147/28891	7.43328e-17	3.70549e-14	2.29649e-14	Bdnf/Cycs/Cox7a2/Ndufs5/Fxn/Uqcrfs1/Cox6a1/Ndufa6/Coq7/Uqcrc2/Cyc1/Ndufab1/Ndufc1/Uqcrc1/Ndufs1/Atp5pb/Sdhb/Ndufa11/Ndufa8/Cox8a/Ndufs4/Uqcrb/Ndufb1/Antkmt/Ndufb7/Ndufv2/Cox5a/Rhoa/Cox5b/Sdhd/Cox7c/Ndufb6/Vcp/Chchd2/Ndufc2/Ndufb9/Ndufa7/Ndufa13/Park7/Ndufb11/Ndufb10/Cox4i1	42	GO_BP	up
GO:0043161	proteasome-mediated ubiquitin-dependent protein catabolic process	80/1852	451/28891	8.83652e-17	4.06616e-14	2.52002e-14	Kctd13/Selenos/Nedd4l/Clu/Gclc/Rnf5/Fbxo9/Jkamp/Dda1/Il33/Csnk1e/Hsp90b1/Derl1/Trib1/Faf2/Fbxl7/Amfr/Fbxl5/Ube2g2/Fbxo3/Rnf126/Ubxn2a/Amn1/Gipc1/Bag5/Ccdc47/Ufd1/Sec61b/Tbl1xr1/Edem1/Rad23a/Ppp2cb/Derl2/Ddit3/Rybp/Ube2b/Psmb3/Psmd7/Araf/Ube2v2/Bag6/Rnf14/Psmc2/Psmd8/Erlec1/Psmc5/Rbx1/Ubr2/Nsfl1c/Skp1/Fbxl3/Ube2d3/Ube2n/Psmc3/Dcaf12/Gsk3a/Psmc6/Psmb5/Hspa5/Akirin2/Psmd6/Cd2ap/Canx/Klhdc2/Cul5/Sumo…	80	GO_BP	up
GO:1902903	regulation of supramolecular fiber organization	73/1852	393/28891	1.57081e-16	6.46119e-14	4.00435e-14	Rgs4/Arhgap28/Tac1/Cryab/Rgcc/F2rl1/Clu/Tpm1/Sema5a/Actg1/Limch1/Gsn/Capg/Sdc4/Pfdn4/Rhoc/Map3k1/Gda/Rnh1/Hdac2/Sgk1/Map1b/Mapre3/Cdc42ep2/Eml2/Ptk2b/Vasp/Twf1/App/Capza2/Arf1/Mtpn/Evl/Inpp5k/Fhod3/Gmfb/Svil/Cttn/Pfn1/Rock2/Arpc5/Ap1ar/Cdkn1b/Grb2/Naa80/Akap9/Nck2/Cdc42/Pak2/Wdr1/Arpc5l/Flna/Vbp1/Pfdn2/Arpc3/Wnt4/Dbnl/Arpc2/Cdk5rap2/Prkcd/Cx3cl1/Capzb/Dstn/Rb1/Rhoa/Pycard/Rac1/Tmsb4x/Dctn1/Fkbp4/…	73	GO_BP	up
GO:0032970	regulation of actin filament-based process	74/1852	402/28891	1.62016e-16	6.46119e-14	4.00435e-14	Rgs4/Arhgap28/Fam107a/Acta2/Tac1/Tgfb2/Rgcc/F2rl1/Hras/Tpm1/Iqgap2/Adrb1/Sema5a/Actg1/Ilk/Limch1/Gsn/Capg/Sdc4/Rhoc/Map3k1/Rnh1/Atp2a2/Hdac2/Cdc42ep2/Tgfb1/Ptk2b/Vasp/Twf1/Atp1a1/Dsc2/Capza2/Epha3/Arf1/Mtpn/Abracl/Evl/Inpp5k/Fhod3/Gmfb/Svil/Cttn/Pfn1/Rock2/Arpc5/Ap1ar/Grb2/Naa80/Akap9/Nck2/Rala/Cdc42/Pak2/Wdr1/Arpc5l/Flna/Arpc3/Wnt4/Dbnl/Arpc2/Cd2ap/Prkcd/Cx3cl1/Capzb/Dstn/Pard3/Cnn2/Rhoa/Pycard/…	74	GO_BP	up
GO:0045333	cellular respiration	56/1852	254/28891	2.3861e-16	8.92103e-14	5.52885e-14	Bdnf/Cisd1/Mdh2/Cycs/Cox7a2/Pdhb/Bax/Idh1/Ndufs5/Fxn/Uqcrfs1/Cox6a1/Ndufa6/Coq7/Uqcrc2/Cyc1/Ndufab1/Idh2/Ndufc1/Uqcrc1/Ndufs1/Aco2/Atp5pb/Sdhb/Idh3a/Ndufa11/Ndufa8/Cox8a/Slc1a3/Ndufs4/Sod2/Uqcrb/Ndufb1/Il10rb/Antkmt/Ndufb7/Ndufv2/Cox5a/Rhoa/Cox5b/Sdhd/Cox7c/Ndufb6/Vcp/Chchd2/Ndufc2/Ndufb9/Ndufa7/Ndufa13/Park7/Ndufb11/Ndufb10/Mdh1/Hif1a/Etfa/Cox4i1	56	GO_BP	up
GO:0006605	protein targeting	62/1852	303/28891	2.70365e-16	9.51368e-14	5.89614e-14	Hras/Gdi1/Clu/Timm17a/Zdhhc4/Srpr/Zdhhc21/Sec62/Tomm20/Srp14/Pmpcb/Pam16/Ncoa4/Get4/Tomm22/Ywhaq/Rab8b/Gipc1/Becn1/Spcs1/Tomm34/Spcs2/Spcs3/Sec61b/Inpp5k/Edem1/Srprb/Cdk5/Srp68/Sec61a1/Bag6/Srp19/Vps4a/Srp9/Hspd1/Micall1/Hspa4/Ywhae/Trak1/Ywhaz/Ssr3/Sorl1/Tomm40/Gsk3a/Hspa5/Yif1b/Arpc2/Pex2/Mff/Mtch1/Fis1/Srp72/Pard3/Sec61g/Zfand6/Bcap31/Chmp4b/Naca/Hspa8/Ndufa13/Arl6ip1/Ywhab	62	GO_BP	up
GO:0043254	regulation of protein-containing complex assembly	75/1852	437/28891	5.03781e-15	1.67423e-12	1.03761e-12	Arhgap28/Rab3a/Unc13b/Cck/Cryab/Gnl3l/Cd24a/Clu/Ica1/Tpm1/Gsn/Vdac2/Capg/Rhoc/Map3k1/Gda/H3f3b/Sgk1/Map1b/Sox9/Mapre3/Cdc42ep2/Bax/Eml2/Tgfb1/Ptk2b/Vasp/Twf1/Ctnnbip1/Atat1/Capza2/Sh3glb1/Mtpn/Sar1b/Thra/Evl/Fhod3/Svil/Cttn/Pfn1/Med25/Arpc5/Cdkn1b/Grb2/Dut/Akap9/Nck2/Cdc42/Sar1a/Lcmt1/Arpc5l/Sorl1/Psmc6/Arpc3/Lmo4/Dbnl/Arpc2/Cdk5rap2/Prkcd/Riok3/Capzb/Rhoa/Pycard/Rac1/Stub1/Tmsb4x/Dctn1/Vcp/Fkbp4…	75	GO_BP	up
GO:0015980	energy derivation by oxidation of organic compounds	65/1852	350/28891	7.27248e-15	2.28968e-12	1.41904e-12	Bdnf/Cisd1/Mdh2/Cycs/Adrb1/Nr1d1/Cox7a2/Ppp1r2/Pdhb/Bax/Pth/Idh1/Ndufs5/Fxn/Uqcrfs1/Cox6a1/Ndufa6/Coq7/Uqcrc2/Ppp1cb/Cyc1/Ndufab1/Inpp5k/Idh2/Ndufc1/Uqcrc1/Ndufs1/Aco2/Atp5pb/Sdhb/Idh3a/Ndufa11/Ndufa8/Cox8a/Slc1a3/Ndufs4/Tcf7l2/Sod2/Gsk3a/Uqcrb/Ndufb1/Il10rb/Ugp2/Antkmt/Ndufb7/Ndufv2/Cox5a/Rhoa/Cox5b/Sdhd/Cox7c/Ndufb6/Vcp/Chchd2/Ndufc2/Ndufb9/Ndufa7/Ndufa13/Park7/Ndufb11/Ndufb10/Mdh1/Hif1a/Etfa/C…	65	GO_BP	up
GO:0006091	generation of precursor metabolites and energy	79/1852	484/28891	1.60183e-14	4.79107e-12	2.96928e-12	Bdnf/Hsd11b1/Cox17/Pgam2/Cisd1/Mdh2/Cycs/Adrb1/Nr1d1/Cox7a2/Ppp1r2/Pdhb/Ucp2/Galt/Bax/Pth/Idh1/Ndufs5/App/Fxn/Uqcrfs1/Cox6a1/Ndufa6/Coq7/Uqcrc2/Ppp1cb/Cyc1/Ndufab1/Inpp5k/Gapdh/Idh2/Ndufc1/Uqcrc1/Kat2b/Ndufs1/Fdx1/Aco2/Aldoa/Atp5pb/Ddit4/Sdhb/Idh3a/Slc4a4/Coa8/Ndufa11/Ndufa4/Ndufa8/Cox8a/Slc1a3/Ndufs4/Tcf7l2/Sod2/Gsk3a/Uqcrb/Ndufb1/Il10rb/Ugp2/Antkmt/Ndufb7/Ndufv2/Cox5a/Rhoa/Cox5b/Sdhd/Cox7c/Nduf…	79	GO_BP	up
GO:0070972	protein localization to endoplasmic reticulum	28/1852	78/28891	1.70065e-14	4.84441e-12	3.00234e-12	Srpr/Sec62/Srp14/Insig2/Gabarapl2/Get4/Spcs1/Kdelr2/Rer1/Spcs2/Spcs3/Sec61b/Edem1/Srprb/Srp68/Sec61a1/Bag6/Srp19/Srp9/Ssr3/Hspa5/Vapa/Srp72/Sec61g/Bcap31/Chmp4b/Naca/Btf3	28	GO_BP	up
GO:0031647	regulation of protein stability	60/1852	316/28891	2.84343e-14	7.44207e-12	4.61225e-12	Fam107a/Atp1b1/Cryab/Nedd4l/Gnl3l/Clu/Rnf5/Nr1d1/Epha4/Atp1b3/Derl1/Gsn/Pin1/Trim24/Rnf149/Mylip/Cct7/Cct2/Stx12/Ddi2/Pdcl3/Ccdc88c/Get4/Rab21/Gtpbp4/Gipc1/Bag5/Apbb2/Aptx/Gapdh/Rad23a/Flot1/Tcp1/Pfn1/Ube2b/Bag6/Hypk/Chp1/Hspd1/Dsc3/Fbxl3/Coa8/Flna/Cct6a/Ddost/Morc3/Pex2/Glmp/Cmtm6/Cul3/Aak1/Cd81/Pdcd10/Pycard/Stub1/Hsp90ab1/Gnaq/Hspa8/Park7/Cct5	60	GO_BP	up
GO:0032956	regulation of actin cytoskeleton organization	64/1852	351/28891	2.86138e-14	7.44207e-12	4.61225e-12	Rgs4/Arhgap28/Fam107a/Tac1/Tgfb2/Rgcc/F2rl1/Hras/Tpm1/Iqgap2/Sema5a/Actg1/Ilk/Limch1/Gsn/Capg/Sdc4/Rhoc/Map3k1/Rnh1/Hdac2/Cdc42ep2/Tgfb1/Ptk2b/Vasp/Twf1/Capza2/Epha3/Arf1/Mtpn/Evl/Inpp5k/Fhod3/Gmfb/Svil/Cttn/Pfn1/Rock2/Arpc5/Ap1ar/Grb2/Naa80/Nck2/Rala/Cdc42/Pak2/Wdr1/Arpc5l/Flna/Arpc3/Wnt4/Dbnl/Arpc2/Cd2ap/Prkcd/Cx3cl1/Capzb/Dstn/Rhoa/Pycard/Rac1/Tmsb4x/Snx9/Brk1	64	GO_BP	up
GO:0051656	establishment of organelle localization	79/1852	491/28891	3.54296e-14	8.83083e-12	5.47294e-12	Nppc/Rab3a/Dnm3/Trappc6b/Kif5c/Chmp5/Kif5b/Smpd3/Nup88/Spry2/Tsg101/Spry1/Sdc4/Ltv1/Fgfr2/Trappc4/Map1b/Trappc2l/Slc2a4/Chmp1b/Nherf1/Tmem230/Tuba1a/Bloc1s4/Kif1b/Arf1/Sar1b/Becn1/Bicd2/Exoc7/Trip11/Trappc2/Cdk5/Abraxas2/Ube2b/Kat2b/Stard3nl/Copg1/Atp13a2/Ap1ar/Vps4a/Chp1/Limk2/Dynll1/Actr10/Cdc42/Sar1a/Nsfl1c/Pdpk1/Borcs8/Trak1/Ywhaz/Actn4/Trappc1/Ap3s1/Rab11a/Picalm/Stk25/Ccdc186/Bccip/Snapin/M…	79	GO_BP	up
GO:0051648	vesicle localization	47/1852	214/28891	6.9473e-14	1.66235e-11	1.03025e-11	Rab3a/Dnm3/Trappc6b/Kif5c/Kif5b/Smpd3/Tsg101/Syn3/Sdc4/Fgfr2/Trappc4/Trappc2l/Slc2a4/Tmem230/Bloc1s4/Kif1b/Arf1/Sar1b/Exoc7/Trip11/Trappc2/Cdk5/Stard3nl/Atp13a2/Ap1ar/Vps4a/Chp1/Limk2/Uso1/Sar1a/Trak1/Actn4/Trappc1/Ap3s1/Rab11a/Picalm/Tcf7l2/Ccdc186/Snapin/Myo1d/Map2k1/Cul3/Rab1a/Chmp2a/Dctn1/Tmed10/Rab11b	47	GO_BP	up
GO:0016050	vesicle organization	64/1852	359/28891	8.44222e-14	1.94236e-11	1.20378e-11	Rab3a/Unc13b/Dnm3/Plekha3/Atp6v1e1/Tmf1/Trappc6b/Chmp5/Kif5b/Rnasek/Tsg101/Osbp/Sec13/Sdc4/Stx7/Atp6v1d/Atp6v1g1/Vamp2/Atp6v1a/Trappc4/Yipf4/Stx12/Atp6v1h/Trappc2l/Slc2a4/Chmp1b/Cav2/Bloc1s4/Rab8b/Arf1/Atp6ap1/Sar1b/Sec23a/Gosr1/Rab13/Trappc2/Plekhj1/Atp6v1f/Atp13a2/Vps4a/Clcn3/Chp1/Snap47/Uso1/Atp6ap2/Sar1a/Trappc1/Ap3s1/Rab11a/Picalm/Rab14/Snapin/Rab12/Stx6/Cd2ap/Vapa/Cul3/Vti1b/Rab1a/Lamtor1/C…	64	GO_BP	up
GO:0051650	establishment of vesicle localization	44/1852	193/28891	1.07771e-13	2.38772e-11	1.4798e-11	Rab3a/Dnm3/Trappc6b/Kif5c/Kif5b/Smpd3/Tsg101/Sdc4/Fgfr2/Trappc4/Trappc2l/Slc2a4/Tmem230/Bloc1s4/Kif1b/Arf1/Sar1b/Exoc7/Trip11/Trappc2/Cdk5/Stard3nl/Atp13a2/Ap1ar/Vps4a/Chp1/Limk2/Sar1a/Trak1/Actn4/Trappc1/Ap3s1/Rab11a/Picalm/Ccdc186/Snapin/Myo1d/Map2k1/Cul3/Rab1a/Chmp2a/Dctn1/Tmed10/Rab11b	44	GO_BP	up
GO:0035966	response to topologically incorrect protein	36/1852	135/28891	1.21226e-13	2.5899e-11	1.6051e-11	Thbs1/Selenos/Clu/Manf/Rnf5/Jkamp/Derl1/Dnajc3/Faf2/Amfr/Bax/Rnf126/Atf6b/Dnajb14/Serp1/Creb3l2/Ufd1/Parp8/Edem1/Tmed2/Creb3/Derl2/Ddit3/Tmem33/Bag6/Tmbim6/Hspd1/Nck2/Erlec1/Hspa5/Akirin2/Eif2s1/Cul3/Nfe2l2/Stub1/Vcp	36	GO_BP	up
GO:1990778	protein localization to cell periphery	68/1852	400/28891	1.5151e-13	3.12529e-11	1.93691e-11	Rab3a/Dpp10/Atp1b1/Rapgef4/Pls1/Lin7c/Cnst/Hras/Kcnip3/Kif5b/Atp1b3/Myl12a/Stx7/Vamp2/Tgfb1/Nherf1/Tmem59/Bsg/Rab8b/Epha3/Kif1b/Snx27/Atp6ap1/Mex3b/Rer1/Sec23a/Actb/Inpp5k/Rab13/Tmed2/Flot1/Ttc7/Cdk5/Acsl3/Gorasp2/Atp2c1/Rock2/Kalrn/Sacm1l/Vps4a/Gpc4/Arl6ip5/Snap47/Ift20/Pacs1/Flna/Sorl1/Errfi1/Gga2/Rab11a/Picalm/Rab12/Pdzd11/Itgb1/Emp2/Golga4/Map2k1/Cd81/Hectd1/Vti1b/Pgrmc1/Csnk2a1/Rac1/Tnfrsf1a…	68	GO_BP	up
GO:0032527	protein exit from endoplasmic reticulum	20/1852	42/28891	1.62808e-13	3.2464e-11	2.01197e-11	Selenos/Tmem30b/Tmem30a/Derl1/Sec13/Faf2/Tecpr2/Ube2g2/Sar1b/Ufd1/Sec61b/Edem1/Derl2/Erlec1/Sar1a/Sorl1/H13/Cd81/Bcap31/Vcp	20	GO_BP	up
GO:0032535	regulation of cellular component size	69/1852	411/28891	1.86946e-13	3.49751e-11	2.16759e-11	Arhgap28/Bdnf/Tnfrsf12a/Crabp2/Sema3f/Pls1/Deptor/F2rl1/Gdi1/Tpm1/Stk39/Sema5a/Ilk/Gsn/Olfm1/Capg/Map3k1/Map1b/Cdc42ep2/Ptk2b/Vasp/Nherf1/Rab21/Twf1/Sema4c/Fxn/Capza2/Mtpn/Evl/Fhod3/Svil/Cdk5/Cttn/Pfn1/Arpc5/Atp13a2/Grb2/Clcn3/Naa80/Nck2/Wdr1/Arpc5l/Borcs8/Dnm2/Rab11a/Picalm/Snapin/Cxcl12/Arpc3/Dbnl/Arpc2/Golga4/Prkcd/Rab5a/Capzb/Rgma/Dstn/Clns1a/Rhoa/Hp1bp3/Pycard/Rac1/Tmsb4x/Hsp90ab1/Lamtor5/Sn…	69	GO_BP	up
GO:0006457	protein folding	41/1852	173/28891	1.87095e-13	3.49751e-11	2.16759e-11	Nppc/Cryab/Clu/H2-DMb1/Pofut2/Hspb2/Hsp90b1/Dnajc3/Pfdn4/Cct7/Txndc5/Hspa14/Cct2/Pdcl3/Dnajb11/Tbca/Sh3glb1/Bag5/Dnajb14/Tcp1/Sdf2/Hspd1/Selenof/Hspa4/Tbcb/Vbp1/Cct6a/Pfdn2/Pdia4/Hspa5/Canx/Ppia/Dnaja2/Pdia3/Dnajb6/Stub1/Dnajc7/Hsp90ab1/Fkbp4/Hspa8/Cct5	41	GO_BP	up
GO:0051098	regulation of binding	68/1852	405/28891	2.7823e-13	5.01948e-11	3.11084e-11	Arhgap28/Bdnf/Nes/Tgfb2/Cdkn1a/Cthrc1/Gnl3l/Bmp4/Cycs/Id2/Epha4/Cald1/Derl1/Pin1/Ppp1r2/Atp2a2/Hdac2/1810037I17Rik/Amfr/Mapre3/Bax/Tgfb1/Hey1/Ctnnbip1/App/Smarca4/Gtpbp4/H1f0/Actb/Tmed2/Flot1/Ppp2cb/Cdk5/Ddit3/Kat2b/Med25/Ubash3b/Nvl/Tmbim6/Gtf2b/Ppp3ca/Cdc42/Nfib/Hspa4/Pacs1/Taf10/Sorl1/Calm1/Zfp462/Hipk1/Tcf7l2/Snapin/Hmgb2/Hnrnpk/Nme1/Ptprf/Edf1/Eif4a3/Eif2s1/Rgma/Rb1/Stub1/Nucks1/Hsp90ab1/Lam…	68	GO_BP	up
GO:0110053	regulation of actin filament organization	54/1852	280/28891	2.85293e-13	5.01948e-11	3.11084e-11	Rgs4/Arhgap28/Tac1/Rgcc/F2rl1/Tpm1/Sema5a/Actg1/Limch1/Gsn/Capg/Sdc4/Rhoc/Map3k1/Rnh1/Cdc42ep2/Ptk2b/Vasp/Twf1/Capza2/Arf1/Mtpn/Evl/Inpp5k/Fhod3/Gmfb/Svil/Cttn/Pfn1/Rock2/Arpc5/Ap1ar/Grb2/Naa80/Nck2/Cdc42/Pak2/Wdr1/Arpc5l/Flna/Arpc3/Wnt4/Dbnl/Arpc2/Prkcd/Cx3cl1/Capzb/Dstn/Rhoa/Pycard/Rac1/Tmsb4x/Snx9/Brk1	54	GO_BP	up
GO:0019646	aerobic electron transport chain	24/1852	64/28891	4.12539e-13	7.05088e-11	4.36981e-11	Bdnf/Cycs/Cox7a2/Uqcrfs1/Cox6a1/Uqcrc2/Cyc1/Uqcrc1/Ndufs1/Sdhb/Ndufa8/Cox8a/Uqcrb/Ndufv2/Cox5a/Cox5b/Sdhd/Cox7c/Ndufb6/Ndufc2/Ndufb9/Ndufa7/Park7/Cox4i1	24	GO_BP	up
GO:0045047	protein targeting to ER	20/1852	45/28891	8.33585e-13	1.38514e-10	8.58447e-11	Srpr/Sec62/Srp14/Get4/Spcs1/Spcs2/Spcs3/Sec61b/Edem1/Srprb/Srp68/Sec61a1/Bag6/Srp19/Srp9/Ssr3/Hspa5/Srp72/Sec61g/Chmp4b	20	GO_BP	up
GO:0072659	protein localization to plasma membrane	57/1852	315/28891	1.01294e-12	1.63768e-10	1.01496e-10	Rab3a/Dpp10/Atp1b1/Pls1/Cnst/Kcnip3/Kif5b/Atp1b3/Myl12a/Stx7/Vamp2/Tgfb1/Nherf1/Tmem59/Bsg/Rab8b/Epha3/Snx27/Atp6ap1/Rer1/Sec23a/Actb/Inpp5k/Rab13/Tmed2/Flot1/Ttc7/Cdk5/Acsl3/Gorasp2/Atp2c1/Rock2/Vps4a/Arl6ip5/Ift20/Pacs1/Flna/Sorl1/Errfi1/Gga2/Rab11a/Picalm/Rab12/Itgb1/Emp2/Golga4/Cd81/Hectd1/Vti1b/Pgrmc1/Csnk2a1/Rac1/Tnfrsf1a/Vamp8/Lrp6/Gas6/Ezr	57	GO_BP	up
GO:0097193	intrinsic apoptotic signaling pathway	58/1852	327/28891	1.52581e-12	2.40195e-10	1.48862e-10	Mllt11/Selenos/Dapk2/Cdkn1a/Hras/Clu/Cycs/Vdac2/Sfn/Hdac2/Skil/Tmem161a/Bax/Nherf1/App/Polb/Mapk8ip1/Sh3glb1/Bag5/Becn1/Creb3/Ddit3/Hdac1/Itpr1/Bag6/Perp/Arl6ip5/Tmbim6/Mif/Ddit4/Nck2/Coa8/Rrm2b/Aldh2/Rnf7/Hipk1/Stk25/Sod2/Erp29/Hnrnpk/Cxcl12/Ppia/Rps27l/Map2k1/Fis1/Nfe2l2/Serinc3/Pdcd10/Pycard/Bcap31/Tnfrsf1a/Ddx5/Ybx3/Selenok/Ndufa13/Park7/Spop/Hif1a	58	GO_BP	up
GO:0042775	mitochondrial ATP synthesis coupled electron transport	26/1852	80/28891	2.0966e-12	3.21586e-10	1.99304e-10	Bdnf/Cycs/Cox7a2/Uqcrfs1/Cox6a1/Coq7/Uqcrc2/Cyc1/Uqcrc1/Ndufs1/Sdhb/Ndufa8/Cox8a/Uqcrb/Ndufv2/Cox5a/Cox5b/Sdhd/Cox7c/Ndufb6/Chchd2/Ndufc2/Ndufb9/Ndufa7/Park7/Cox4i1	26	GO_BP	up
GO:0022904	respiratory electron transport chain	30/1852	106/28891	2.47281e-12	3.69809e-10	2.29191e-10	Bdnf/Cycs/Cox7a2/Uqcrfs1/Cox6a1/Coq7/Uqcrc2/Cyc1/Uqcrc1/Ndufs1/Sdhb/Ndufa8/Cox8a/Slc1a3/Ndufs4/Sod2/Uqcrb/Ndufv2/Cox5a/Cox5b/Sdhd/Cox7c/Ndufb6/Chchd2/Ndufc2/Ndufb9/Ndufa7/Park7/Etfa/Cox4i1	30	GO_BP	up
GO:0042773	ATP synthesis coupled electron transport	26/1852	82/28891	3.98914e-12	5.82025e-10	3.60712e-10	Bdnf/Cycs/Cox7a2/Uqcrfs1/Cox6a1/Coq7/Uqcrc2/Cyc1/Uqcrc1/Ndufs1/Sdhb/Ndufa8/Cox8a/Uqcrb/Ndufv2/Cox5a/Cox5b/Sdhd/Cox7c/Ndufb6/Chchd2/Ndufc2/Ndufb9/Ndufa7/Park7/Cox4i1	26	GO_BP	up
GO:0008154	actin polymerization or depolymerization	42/1852	197/28891	4.13497e-12	5.88938e-10	3.64997e-10	Arhgap28/Fam107a/Gas7/F2rl1/Tpm1/Sema5a/Gsn/Capg/Map3k1/Cdc42ep2/Ptk2b/Vasp/Twf1/Cobl/Capza2/Mtpn/Evl/Fhod3/Svil/Cttn/Pfn1/Arpc5/Grb2/Naa80/Nck2/Wdr1/Arpc5l/Arpc3/Dbnl/Arpc2/Prkcd/Mical3/Arpc4/Capzb/Dstn/Rhoa/Pycard/Enah/Rac1/Tmsb4x/Snx9/Brk1	42	GO_BP	up
GO:0009100	glycoprotein metabolic process	60/1852	354/28891	4.6334e-12	6.44581e-10	3.99482e-10	Hs3st6/Tmtc1/Galnt2/Pcsk6/Large2/St3gal1/Ganc/B3gnt2/B3galt6/Mgat5b/Aga/Chsy1/Pofut2/Galnt14/Il33/St6gal1/Hbegf/Slc35d1/Itm2b/St3gal6/C1galt1c1/B4galt1/Slc35b2/Mgat4a/Gal3st4/Ctsl/Mgat2/Il15/Man2a2/Hs6st1/B3galt2/Tmem59/Mlec/Bpnt2/Nus1/St3gal2/Trip11/Plod3/Edem1/Hs2st1/Ago2/Hexb/Pomgnt1/Alg5/C1galt1/Chp1/Stt3a/Tcf7l2/Ddost/Magt1/Tmem258/Rab1a/Itm2c/Tm9sf2/Sulf1/Rpn2/Ost4/Ostc/Cst3/Hif1a	60	GO_BP	up
GO:0022900	electron transport chain	31/1852	116/28891	5.64658e-12	7.67679e-10	4.75772e-10	Bdnf/Cycs/Cox7a2/Uqcrfs1/Cox6a1/Coq7/Uqcrc2/Cyc1/Uqcrc1/Ndufs1/Fdx1/Sdhb/Ndufa8/Cox8a/Slc1a3/Ndufs4/Sod2/Uqcrb/Ndufv2/Cox5a/Cox5b/Sdhd/Cox7c/Ndufb6/Chchd2/Ndufc2/Ndufb9/Ndufa7/Park7/Etfa/Cox4i1	31	GO_BP	up
GO:0072599	establishment of protein localization to endoplasmic reticulum	20/1852	49/28891	5.80001e-12	7.71014e-10	4.77839e-10	Srpr/Sec62/Srp14/Get4/Spcs1/Spcs2/Spcs3/Sec61b/Edem1/Srprb/Srp68/Sec61a1/Bag6/Srp19/Srp9/Ssr3/Hspa5/Srp72/Sec61g/Chmp4b	20	GO_BP	up
GO:0022411	cellular component disassembly	71/1852	462/28891	6.54269e-12	8.50834e-10	5.27308e-10	Nes/Tgfb2/Ddr2/Cidea/Dnase2a/Pnpla2/F2rl1/Cd24a/Map1lc3a/H2ac25/Tpm1/Chmp5/Kif5b/Sema5a/Ets1/Epha4/Gsn/Uba5/Capg/Atp2a2/Sgk1/Map1b/Gabarapl2/Bax/Chmp1b/Twf1/Vdac1/Smarca4/Capza2/Dnajc6/Slc25a4/Mtpn/Becn1/Evl/Flot1/Svil/Cdk5/Cttn/Vps4a/Atg12/Ddit4/Cisd2/Wdr1/Ddr1/Smarcd2/Calm1/Snapin/Gsk3a/Fundc1/Itgb1/Arpc2/Slc25a5/Lrba/Fis1/Mical3/Ufc1/Capzb/Dstn/Rhoa/Vmp1/Septin7/Chmp2a/Atg3/Dctn1/Vcp/Chmp4b/Va…	71	GO_BP	up
GO:0009141	nucleoside triphosphate metabolic process	40/1852	184/28891	6.97818e-12	8.88159e-10	5.5044e-10	Atp1b1/Nt5e/Ada/Nme7/Atp6v1a/Tgfb1/Nudt5/Ndufs5/Ndufa6/Ndufab1/Ndufc1/Ndufs1/Aldoa/Dut/Atp5pb/Sdhb/Ndufa11/Rrm2b/Ndufa8/Ndufs4/Ak2/Nme2/Nme1/Ndufb1/Map2k1/Fis1/Antkmt/Ndufb7/Ndufv2/Rhoa/Sdhd/Ndufb6/Vcp/Hspa8/Ndufc2/Ndufb9/Ndufa7/Ndufa13/Ndufb11/Ndufb10	40	GO_BP	up
GO:0040013	negative regulation of locomotion	60/1852	358/28891	7.51901e-12	9.37057e-10	5.80745e-10	Hoxa7/Dcn/Thbs1/Ngfr/Rgcc/Sema3f/Cygb/Jag1/Cd200/Mctp1/Ptprm/Tpm1/Stk26/Cers2/Srgap1/Ada/Sema5a/Epha4/Il33/Ilk/St6gal1/Limch1/Pin1/Gadd45a/Trib1/Hdac2/Tgfb1/Arhgdib/Adipor1/Nherf1/Sema4c/Gtpbp4/Sinhcaf/Evl/Eppk1/Idh2/Rbbp4/Hdac1/Notch1/Ap1ar/Mif/Hyal2/Csnk2b/Ptprj/Gna13/Spint2/Srgap3/Cxcl12/Wnt4/Cx3cl1/Nfe2l2/Cnn2/Rhoa/Pdcd10/Sin3b/Rac1/Sulf1/Arhgdia/Park7/Rbbp7	60	GO_BP	up
GO:0009144	purine nucleoside triphosphate metabolic process	38/1852	169/28891	7.89355e-12	9.63658e-10	5.97231e-10	Atp1b1/Nt5e/Ada/Nme7/Atp6v1a/Tgfb1/Nudt5/Ndufs5/Ndufa6/Ndufab1/Ndufc1/Ndufs1/Aldoa/Atp5pb/Sdhb/Ndufa11/Ndufa8/Ndufs4/Ak2/Nme2/Nme1/Ndufb1/Map2k1/Fis1/Antkmt/Ndufb7/Ndufv2/Rhoa/Sdhd/Ndufb6/Vcp/Hspa8/Ndufc2/Ndufb9/Ndufa7/Ndufa13/Ndufb11/Ndufb10	38	GO_BP	up
GO:0035967	cellular response to topologically incorrect protein	29/1852	104/28891	8.573e-12	1.02567e-09	6.35666e-10	Selenos/Rnf5/Derl1/Dnajc3/Amfr/Bax/Rnf126/Atf6b/Dnajb14/Serp1/Ufd1/Parp8/Tmed2/Creb3/Derl2/Ddit3/Tmem33/Bag6/Tmbim6/Hspd1/Nck2/Erlec1/Hspa5/Akirin2/Eif2s1/Cul3/Nfe2l2/Stub1/Vcp	29	GO_BP	up
GO:2001234	negative regulation of apoptotic signaling pathway	48/1852	253/28891	1.08734e-11	1.27538e-09	7.90425e-10	Bdnf/Selenos/Clu/Bmi1/Gclc/Pea15a/Bmp4/Itga6/Vdac2/Tmem14a/Hdac2/Cth/Pam16/Tmem161a/Bax/Fxn/Mapk8ip1/Slc25a4/Sh3glb1/Bag5/Gas1/Creb3/Il7/Cttn/Hdac1/Prdx2/Tmbim6/Mif/Itgav/Rrm2b/Tcf7l2/Ghitm/Sod2/Hmgb2/Cxcl12/Eya2/Wnt4/Slc25a5/Ppia/Cx3cl1/Map2k1/Nfe2l2/Rb1/Ybx3/Ndufa13/Gnai2/Park7/Hif1a	48	GO_BP	up
GO:0072521	purine-containing compound metabolic process	72/1852	479/28891	1.34757e-11	1.55023e-09	9.6076e-10	Nppc/Glyat/Hsd11b1/Atp1b1/Fmo2/Acsl4/Mdh2/Nt5e/Txnrd1/Ada/Noct/Nme7/Pdhb/Pank3/Gda/Nudt18/Atp6v1a/Gpd2/Tgfb1/Nudt5/Idh1/Ndufs5/Vdac1/Ppat/Ndufa6/Macrod2/Ndufab1/Nt5c3/Idh2/Acsl3/Acot1/Ndufc1/Lacc1/Ndufs1/Fdx1/Aldoa/Atp5pb/Sdhb/Idh3a/Nudt3/Ndufa11/Ndufa8/Nt5c2/Dcxr/Ndufs4/Ak2/Nme2/Mpc1/Prdx5/Nme1/Gmpr/Ndufb1/Oard1/Map2k1/Fis1/Antkmt/Ndufb7/Ndufv2/Rhoa/Sdhd/Ndufb6/Papss1/Pcmt1/Vcp/Hspa8/Ndufc2/Nduf…	72	GO_BP	up
GO:2000146	negative regulation of cell motility	56/1852	326/28891	1.37878e-11	1.55619e-09	9.64458e-10	Hoxa7/Dcn/Thbs1/Ngfr/Rgcc/Cygb/Jag1/Cd200/Mctp1/Ptprm/Tpm1/Stk26/Cers2/Srgap1/Ada/Epha4/Il33/Ilk/Limch1/Pin1/Gadd45a/Trib1/Hdac2/Tgfb1/Arhgdib/Adipor1/Nherf1/Gtpbp4/Sinhcaf/Evl/Eppk1/Idh2/Rbbp4/Hdac1/Notch1/Ap1ar/Mif/Hyal2/Csnk2b/Ptprj/Gna13/Spint2/Srgap3/Cxcl12/Wnt4/Cx3cl1/Nfe2l2/Cnn2/Rhoa/Pdcd10/Sin3b/Rac1/Sulf1/Arhgdia/Park7/Rbbp7	56	GO_BP	up
GO:0016032	viral process	56/1852	329/28891	1.99995e-11	2.2155e-09	1.37306e-09	Chmp5/Rnasek/Tsg101/Gsn/Map3k1/Dynlt1f/Igf2r/Chmp1b/Tpcn2/Cav2/Hacd3/Smarca4/Trim8/Bsg/Trim59/Spcs1/Spcs3/Eif3l/Inpp5k/Dynlt1c/Spint1/Creb3/Rad23a/Slc3a2/Pfn1/Hdac1/Notch1/Smpd1/Paip1/Vps4a/Mphosph8/Gtf2b/Atg12/Hyal2/Itgav/Eif3a/Cdk9/Csnk2b/Psmc3/Banf1/Pcbp1/Vapa/Ppia/Larp1/Eef1a1/Ddx6/Rab1a/Chmp2a/Nucks1/Vcp/Chmp4b/Ddx5/Vamp8/Hspa8/Gas6/Csde1	56	GO_BP	up
GO:0009306	protein secretion	67/1852	434/28891	2.08812e-11	2.27111e-09	1.40753e-09	Chrm3/Camk2n1/Rab3a/Unc13b/Tgfb2/Gnao1/Rapgef4/Pde1c/Cd200/F2rl1/Acsl4/Kif5b/Nr1d1/Glul/Jagn1/Osbp/Tvp23b/Ucp2/Prkar1a/Ier3ip1/C1qtnf12/F2r/Tgfb1/Vsnl1/Bsg/Rab8b/Arf1/Abat/Serp1/Gna11/Ube2q1/Frmd4a/Rab13/Wls/Tmed2/Idh2/Copg1/Itpr1/Atp13a2/Zbed6/Dynll1/Ppp3ca/Pim3/Tmem167/Psmd9/Selenot/Tcf7l2/Ccdc186/Anxa5/Rab12/Erp29/Cd2ap/Ppia/Ensa/Tmem258/Stxbp3/Copg2/Mia2/Rac1/Gnaq/Psap/Vamp8/Hadh/Tmed10/Park7…	67	GO_BP	up
GO:0006163	purine nucleotide metabolic process	68/1852	444/28891	2.13104e-11	2.27641e-09	1.41081e-09	Nppc/Glyat/Hsd11b1/Atp1b1/Fmo2/Acsl4/Mdh2/Nt5e/Txnrd1/Ada/Noct/Nme7/Pdhb/Pank3/Gda/Nudt18/Atp6v1a/Gpd2/Tgfb1/Nudt5/Idh1/Ndufs5/Vdac1/Ppat/Ndufa6/Ndufab1/Idh2/Acsl3/Acot1/Ndufc1/Lacc1/Ndufs1/Fdx1/Aldoa/Atp5pb/Sdhb/Idh3a/Nudt3/Ndufa11/Ndufa8/Nt5c2/Dcxr/Ndufs4/Ak2/Nme2/Mpc1/Prdx5/Nme1/Gmpr/Ndufb1/Map2k1/Fis1/Antkmt/Ndufb7/Ndufv2/Rhoa/Sdhd/Ndufb6/Papss1/Vcp/Hspa8/Ndufc2/Ndufb9/Ndufa7/Ndufa13/Ndufb11/…	68	GO_BP	up
GO:0035592	establishment of protein localization to extracellular region	67/1852	435/28891	2.31698e-11	2.43161e-09	1.507e-09	Chrm3/Camk2n1/Rab3a/Unc13b/Tgfb2/Gnao1/Rapgef4/Pde1c/Cd200/F2rl1/Acsl4/Kif5b/Nr1d1/Glul/Jagn1/Osbp/Tvp23b/Ucp2/Prkar1a/Ier3ip1/C1qtnf12/F2r/Tgfb1/Vsnl1/Bsg/Rab8b/Arf1/Abat/Serp1/Gna11/Ube2q1/Frmd4a/Rab13/Wls/Tmed2/Idh2/Copg1/Itpr1/Atp13a2/Zbed6/Dynll1/Ppp3ca/Pim3/Tmem167/Psmd9/Selenot/Tcf7l2/Ccdc186/Anxa5/Rab12/Erp29/Cd2ap/Ppia/Ensa/Tmem258/Stxbp3/Copg2/Mia2/Rac1/Gnaq/Psap/Vamp8/Hadh/Tmed10/Park7…	67	GO_BP	up
GO:1902905	positive regulation of supramolecular fiber organization	39/1852	183/28891	2.42068e-11	2.49664e-09	1.5473e-09	Tac1/Rgcc/F2rl1/Tpm1/Sema5a/Limch1/Gsn/Sdc4/Rhoc/Map3k1/Gda/Map1b/Cdc42ep2/Ptk2b/Vasp/App/Evl/Cttn/Pfn1/Rock2/Cdkn1b/Grb2/Akap9/Nck2/Cdc42/Wdr1/Flna/Wnt4/Arpc2/Cdk5rap2/Cx3cl1/Dstn/Rb1/Rhoa/Pycard/Rac1/Dctn1/Snx9/Brk1	39	GO_BP	up
GO:0003012	muscle system process	68/1852	446/28891	2.61521e-11	2.65155e-09	1.64331e-09	Nppc/Ccn4/Rgs4/Myh4/Chrm3/Myh13/Acta2/Ece1/Atp1b1/Col14a1/Smtn/Atp8a2/Pgam2/Tpm2/Nedd4l/Myh1/Fbxo32/Tpm1/Bmp4/Adrb1/Ada/Cmya5/Smpd3/Zdhhc21/Cald1/Gsn/Pin1/Edn2/Atp2a2/Setd3/F2r/Arhgap42/Calm2/Tpcn2/Twf1/Ormdl3/Atp1a1/Dsc2/Slc25a4/Mtpn/Abat/Apbb2/Becn1/Tpm4/Cttn/Ppp1r13l/Ddx39b/Mef2a/Rock2/Notch1/Aldoa/Fkbp1a/Ppp3ca/Akap9/Myl6/Cdk9/Flna/Calm1/Errfi1/Ndufs4/Gsk3a/Map2k1/Cert1/Rhoa/Tnfrsf1a/Sulf1/Ds…	68	GO_BP	up
GO:0009205	purine ribonucleoside triphosphate metabolic process	36/1852	160/28891	2.72421e-11	2.71604e-09	1.68328e-09	Atp1b1/Nt5e/Nme7/Atp6v1a/Tgfb1/Nudt5/Ndufs5/Ndufa6/Ndufab1/Ndufc1/Ndufs1/Aldoa/Atp5pb/Sdhb/Ndufa11/Ndufa8/Ndufs4/Nme2/Nme1/Ndufb1/Map2k1/Fis1/Antkmt/Ndufb7/Ndufv2/Rhoa/Sdhd/Ndufb6/Vcp/Hspa8/Ndufc2/Ndufb9/Ndufa7/Ndufa13/Ndufb11/Ndufb10	36	GO_BP	up
GO:0030111	regulation of Wnt signaling pathway	55/1852	323/28891	2.97157e-11	2.91409e-09	1.80602e-09	Ccn4/Sostdc1/Fgf9/Apcdd1/Dcdc2a/Cthrc1/Wnt5b/Shisa2/Tmem64/Dkk3/Sema5a/Ilk/Csnk1e/Pin1/Fam53b/Map3k1/Mdk/Atp6v0c/Hdac2/Fgfr2/Gprc5b/Amfr/Sox9/Ccdc88c/Nxn/Tgfb1/Nherf1/Ctnnbip1/App/Smarca4/Thra/Znrf3/Tbl1xr1/Wls/Ddit3/Vgll4/Ube2b/Hdac1/Notch1/Fzd6/Rnf14/Lgr4/Atp6ap2/Ift20/Nfkb1/Tnks2/Tcf7l2/Gsk3a/Spin1/G3bp1/Gnaq/Sulf1/Vcp/Lrp6/Csnk1a1	55	GO_BP	up
GO:0042060	wound healing	60/1852	370/28891	3.04752e-11	2.94036e-09	1.8223e-09	Ccn4/Rab3a/Abi3bp/Thbs1/Ddr2/Tnfrsf12a/F3/Plet1/Cdkn1a/F2rl1/Arhgap24/Hras/Tpm1/Chmp5/Cd9/Fgf1/Actg1/Hbegf/Sdc4/C1galt1c1/Map3k1/B4galt1/F2r/Cd151/Chmp1b/Dst/Bloc1s4/Evl/Eppk1/Fzd6/Smpd1/Ubash3b/Prdx2/Vps4a/Ptprj/Flna/Ddr1/Pdgfa/Gna13/Anxa5/Pdia4/Itgb1/Wnt4/Prkcd/Ppia/Pdia3/Cx3cl1/Stxbp3/Nfe2l2/Srsf6/Pard3/Cnn2/Pdcd10/Chmp2a/Gnaq/Chmp4b/Naca/Dsp/Gas6/Hif1a	60	GO_BP	up
GO:0042692	muscle cell differentiation	70/1852	468/28891	3.25419e-11	3.08993e-09	1.915e-09	Irx3/Ccn4/Rgs4/Bdnf/Rarb/Fgf9/Col14a1/Lamb1/Nebl/Krt19/Tpm1/Bmp4/Id2/Adrb1/Cd9/Actg1/Bhlhe41/Pin1/H3f3b/Atp2a2/Hdac2/Prkar1a/Fgfr2/Six1/Cth/Setd3/Sox9/Csrp1/Klf5/Tnpo2/Ccnd2/Tgfb1/Tanc1/Cav2/Hey1/Sema4c/Smarca4/Slc25a4/Atp11a/Ptgfrn/Fhod3/Flot1/Svil/Bnip2/Ddx39b/Mef2a/Notch1/Kras/Efnb2/Zbed6/Pdcd4/Ppp3ca/Lncpint/Med28/Ift20/Cdk9/Wdr1/Actn4/Sod2/Gsk3a/Itgb1/Akirin2/Cxcl12/Wnt4/Cd81/Rb1/H3f3a/Tmsb4…	70	GO_BP	up
GO:0042776	proton motive force-driven mitochondrial ATP synthesis	22/1852	65/28891	4.16127e-11	3.88949e-09	2.41053e-09	Ndufs5/Ndufa6/Ndufab1/Ndufc1/Ndufs1/Atp5pb/Sdhb/Ndufa11/Ndufa8/Ndufs4/Ndufb1/Antkmt/Ndufb7/Ndufv2/Sdhd/Ndufb6/Ndufc2/Ndufb9/Ndufa7/Ndufa13/Ndufb11/Ndufb10	22	GO_BP	up
GO:0071692	protein localization to extracellular region	67/1852	441/28891	4.287e-11	3.94536e-09	2.44515e-09	Chrm3/Camk2n1/Rab3a/Unc13b/Tgfb2/Gnao1/Rapgef4/Pde1c/Cd200/F2rl1/Acsl4/Kif5b/Nr1d1/Glul/Jagn1/Osbp/Tvp23b/Ucp2/Prkar1a/Ier3ip1/C1qtnf12/F2r/Tgfb1/Vsnl1/Bsg/Rab8b/Arf1/Abat/Serp1/Gna11/Ube2q1/Frmd4a/Rab13/Wls/Tmed2/Idh2/Copg1/Itpr1/Atp13a2/Zbed6/Dynll1/Ppp3ca/Pim3/Tmem167/Psmd9/Selenot/Tcf7l2/Ccdc186/Anxa5/Rab12/Erp29/Cd2ap/Ppia/Ensa/Tmem258/Stxbp3/Copg2/Mia2/Rac1/Gnaq/Psap/Vamp8/Hadh/Tmed10/Park7…	67	GO_BP	up
GO:0001667	ameboidal-type cell migration	70/1852	471/28891	4.36652e-11	3.95766e-09	2.45277e-09	Acta2/Tac1/Dcn/Thbs1/Tgfb2/Akap12/Ddr2/Anxa3/Rgcc/Sema3f/Rab25/Cygb/Tmigd1/Ptprm/Bmp4/Sema5a/Ets1/Fgf1/Glul/Ilk/Hbegf/Ltb4r2/Sdc4/Gadd45a/Edn2/Sox9/Nrtn/Tgfb1/Arhgdib/Ptk2b/Adipor1/Nherf1/Sema4c/Bsg/Nus1/Gipc1/Evl/Rab13/Zfand5/Eppk1/Plcg1/Fndc3b/Arid5b/Pfn1/Ago2/Rock2/Notch1/Efnb2/Sparc/Hyal2/Cdc42/Itgav/Pdpk1/Csnk2b/Actn4/Rab11a/Gna13/Pik3c2a/Fstl1/Itgb1/Cxcl12/C1qbp/Emp2/Nfe2l2/Rhoa/Pdcd10/Rac1…	70	GO_BP	up
GO:0034248	regulation of amide metabolic process	71/1852	482/28891	4.79597e-11	4.28202e-09	2.6538e-09	Hsd11b1/Thbs1/Krt13/Clu/Prkch/Smpd3/Noct/Epha4/Dcp1a/Usp16/Csnk1e/Pin1/Dnajc3/Polr2g/Fto/Secisbp2l/Fxr2/Ptk2b/Ormdl3/App/Eif2ak1/Prmt1/Eif4g3/Serp1/Bzw1/Eif4e/Rbm3/Krt17/Msi2/Gapdh/Tmed2/Niban1/Ncbp2/Mknk1/Ago2/Ddx39b/Zfp706/Rock2/Paip1/Tob1/Srp9/Mrpl13/Samd4b/Nck2/Eef2/Eif5/Fxr1/Sorl1/Picalm/Gsk3a/C1qbp/Sarnp/Eif4a3/Prkcd/Rps27l/Larp1/Eif2s1/Pum3/Ddx6/Nfe2l2/Larp4b/Paip2/Dhx36/Serbp1/Tpr/Hnrnpr/…	71	GO_BP	up
GO:0034250	positive regulation of amide metabolic process	37/1852	171/28891	4.89293e-11	4.30434e-09	2.66763e-09	Thbs1/Clu/Prkch/Smpd3/Epha4/Usp16/Csnk1e/Dnajc3/Polr2g/Fxr2/Ptk2b/Prmt1/Eif4g3/Serp1/Rbm3/Krt17/Niban1/Ago2/Ddx39b/Rock2/Paip1/Tob1/Nck2/Eef2/Fxr1/Picalm/Gsk3a/C1qbp/Eif4a3/Prkcd/Rps27l/Larp1/Nfe2l2/Larp4b/Dhx36/Eif5a/Csde1	37	GO_BP	up
GO:0051258	protein polymerization	50/1852	282/28891	5.28492e-11	4.57743e-09	2.83688e-09	Arhgap28/Fam107a/Gas7/Tpm1/Gsn/Vdac2/Capg/Map3k1/Gda/Sgk1/Map1b/Mapre3/Cdc42ep2/Eml2/Ptk2b/Vasp/Twf1/Cobl/Tuba1a/Capza2/Mtpn/Mzt1/Evl/Fhod3/Svil/Cttn/Pfn1/Gpx4/Arpc5/Cdkn1b/Grb2/Akap9/Nck2/Arpc5l/Arpc3/Dbnl/Arpc2/Cdk5rap2/Prkcd/Arpc4/Capzb/Rhoa/Pycard/Rac1/Chmp2a/Tmsb4x/Dctn1/Fkbp4/Chmp4b/Snx9	50	GO_BP	up
GO:0016197	endosomal transport	45/1852	238/28891	5.35641e-11	4.57743e-09	2.83688e-09	Plekha3/Tmem87a/Chmp5/Leprotl1/Rab6a/Stx12/Vta1/Vps26c/Chmp1b/Dennd5a/Rab8b/Rnf126/Vps36/Snx27/Atp6ap1/Dpy30/Gosr1/Golt1b/Rab13/Plekhj1/Tbc1d10a/Ubxn6/Vps4a/Cdc42/Micall1/Sorl1/Tmem87b/Rab11a/Picalm/Rab14/Rab12/Stx6/Snx17/Tmem50a/Lrba/Cmtm6/Arl1/Vti1b/Lamtor1/Chmp2a/Dctn1/Vcp/Chmp4b/Snx9/Rab11b	45	GO_BP	up
GO:0006612	protein targeting to membrane	31/1852	126/28891	5.7438e-11	4.83935e-09	2.99921e-09	Hras/Gdi1/Zdhhc4/Srpr/Zdhhc21/Sec62/Srp14/Get4/Rab8b/Sec61b/Inpp5k/Srprb/Cdk5/Srp68/Sec61a1/Bag6/Srp19/Srp9/Micall1/Ssr3/Hspa5/Yif1b/Arpc2/Mff/Fis1/Srp72/Pard3/Sec61g/Chmp4b/Naca/Arl6ip1	31	GO_BP	up
GO:0032271	regulation of protein polymerization	41/1852	206/28891	7.29006e-11	6.05682e-09	3.75374e-09	Arhgap28/Tpm1/Gsn/Vdac2/Capg/Map3k1/Gda/Sgk1/Map1b/Mapre3/Cdc42ep2/Eml2/Ptk2b/Vasp/Twf1/Capza2/Mtpn/Evl/Fhod3/Svil/Cttn/Pfn1/Arpc5/Cdkn1b/Grb2/Akap9/Nck2/Arpc5l/Arpc3/Dbnl/Arpc2/Cdk5rap2/Prkcd/Capzb/Rhoa/Pycard/Rac1/Tmsb4x/Dctn1/Fkbp4/Snx9	41	GO_BP	up
GO:0009117	nucleotide metabolic process	72/1852	497/28891	7.61547e-11	6.21274e-09	3.85037e-09	Nppc/Glyat/Hsd11b1/Atp1b1/Fmo2/Acsl4/Mdh2/Nt5e/Txnrd1/Ada/Noct/Nme7/Pdhb/Pank3/Gda/Nudt18/Atp6v1a/Gpd2/Tgfb1/Nudt5/Idh1/Ndufs5/Vdac1/Ppat/Ndufa6/Ndufab1/Nt5c3/Idh2/Acsl3/Acot1/Ndufc1/Lacc1/Ndufs1/Fdx1/Aldoa/Dut/Atp5pb/Sdhb/Idh3a/Nudt3/Ndufa11/Rrm2b/Ndufa8/Nt5c2/Dcxr/Ndufs4/Ak2/Nme2/Mpc1/Prdx5/Nme1/Gmpr/Ndufb1/Map2k1/Fis1/Antkmt/Ndufb7/Ndufv2/Rhoa/Sdhd/Ndufb6/Papss1/Vcp/Hspa8/Ndufc2/Ndufb9/Ndufa7/…	72	GO_BP	up
GO:0009152	purine ribonucleotide biosynthetic process	40/1852	198/28891	7.68544e-11	6.21274e-09	3.85037e-09	Nppc/Acsl4/Ada/Nme7/Pdhb/Pank3/Tgfb1/Ndufs5/Vdac1/Ppat/Ndufa6/Ndufab1/Ndufc1/Ndufs1/Aldoa/Atp5pb/Sdhb/Ndufa11/Ndufa8/Ndufs4/Ak2/Nme2/Mpc1/Nme1/Gmpr/Ndufb1/Map2k1/Antkmt/Ndufb7/Ndufv2/Sdhd/Ndufb6/Papss1/Vcp/Ndufc2/Ndufb9/Ndufa7/Ndufa13/Ndufb11/Ndufb10	40	GO_BP	up
GO:0009206	purine ribonucleoside triphosphate biosynthetic process	29/1852	113/28891	7.90505e-11	6.30507e-09	3.90759e-09	Nme7/Tgfb1/Ndufs5/Ndufa6/Ndufab1/Ndufc1/Ndufs1/Aldoa/Atp5pb/Sdhb/Ndufa11/Ndufa8/Ndufs4/Nme2/Nme1/Ndufb1/Map2k1/Antkmt/Ndufb7/Ndufv2/Sdhd/Ndufb6/Vcp/Ndufc2/Ndufb9/Ndufa7/Ndufa13/Ndufb11/Ndufb10	29	GO_BP	up
GO:0046034	ATP metabolic process	32/1852	135/28891	8.07049e-11	6.35233e-09	3.93688e-09	Atp1b1/Nt5e/Atp6v1a/Tgfb1/Nudt5/Ndufs5/Ndufa6/Ndufab1/Ndufc1/Ndufs1/Aldoa/Atp5pb/Sdhb/Ndufa11/Ndufa8/Ndufs4/Ndufb1/Map2k1/Fis1/Antkmt/Ndufb7/Ndufv2/Sdhd/Ndufb6/Vcp/Hspa8/Ndufc2/Ndufb9/Ndufa7/Ndufa13/Ndufb11/Ndufb10	32	GO_BP	up
GO:0008064	regulation of actin polymerization or depolymerization	36/1852	166/28891	8.30413e-11	6.42802e-09	3.98379e-09	Arhgap28/F2rl1/Tpm1/Sema5a/Gsn/Capg/Map3k1/Cdc42ep2/Ptk2b/Vasp/Twf1/Capza2/Mtpn/Evl/Fhod3/Svil/Cttn/Pfn1/Arpc5/Grb2/Naa80/Nck2/Wdr1/Arpc5l/Arpc3/Dbnl/Arpc2/Prkcd/Capzb/Dstn/Rhoa/Pycard/Rac1/Tmsb4x/Snx9/Brk1	36	GO_BP	up
GO:0030336	negative regulation of cell migration	53/1852	313/28891	8.38157e-11	6.42802e-09	3.98379e-09	Hoxa7/Dcn/Thbs1/Ngfr/Rgcc/Cygb/Jag1/Cd200/Mctp1/Ptprm/Tpm1/Stk26/Cers2/Srgap1/Ada/Epha4/Il33/Ilk/Limch1/Gadd45a/Trib1/Hdac2/Tgfb1/Arhgdib/Adipor1/Nherf1/Gtpbp4/Sinhcaf/Evl/Eppk1/Idh2/Rbbp4/Hdac1/Notch1/Mif/Hyal2/Csnk2b/Ptprj/Gna13/Srgap3/Cxcl12/Wnt4/Cx3cl1/Nfe2l2/Cnn2/Rhoa/Pdcd10/Sin3b/Rac1/Sulf1/Arhgdia/Park7/Rbbp7	53	GO_BP	up
GO:0006979	response to oxidative stress	61/1852	389/28891	8.59638e-11	6.50931e-09	4.03417e-09	Gpx2/Ngfr/Ddr2/Selenos/Cryab/Cygb/Mctp1/Gclc/Tmigd1/Stk26/Bmp4/Txnrd1/Nfe2l1/Pycr2/Smpd3/Aldh3a2/Net1/Gsr/Ucp2/Atp2a2/Hdac2/Tmem161a/Ptk2b/Vkorc1l1/Lig1/Sirpa/Idh1/App/Fxn/Ndufa6/Coq7/Prdx3/Ppp2cb/Prdx1/Gpx4/Prdx2/Atox1/Atp13a2/Arl6ip5/Hyal2/Nfkb1/Coa8/Rrm2b/Banf1/Stk25/Sod2/Prdx5/Psmb5/Pex2/Prkcd/Ppia/Eif2s1/Map2k1/Nfe2l2/Pdcd10/Psap/Chchd2/Selenok/Park7/Cst3/Hif1a	61	GO_BP	up
GO:0001558	regulation of cell growth	68/1852	459/28891	9.52149e-11	7.1197e-09	4.41246e-09	Ccn4/Rgs4/Bdnf/Fam107a/Tgfb2/Col14a1/Tnfrsf12a/Crabp2/Cryab/Sema3f/Cdkn1a/Nedd4l/Gdi1/Acsl4/Adrb1/Sema5a/Ilk/Hbegf/Tsg101/Pin1/Olfm1/Sfn/Cth/Sgk1/Map1b/Tgfb1/Ptk2b/Adipor1/Rab21/Sema4c/Smarca4/Fxn/Slc25a4/Sh3glb1/Mtpn/Gas1/Krt17/Kazald1/Creb3/Cdk5/Derl2/Cttn/Vgll4/Ddx39b/Cdkn2c/Cdkn1b/Crlf3/Hyal2/Cdc42/Ptprj/Ddr1/Dnm2/Picalm/Pttg1/Gsk3a/Hnrnpk/Cxcl12/Dbnl/Golga4/Exosc4/Rgma/Rb1/Rhoa/Lamtor1/Lamto…	68	GO_BP	up
GO:0009199	ribonucleoside triphosphate metabolic process	36/1852	167/28891	9.94022e-11	7.26422e-09	4.50203e-09	Atp1b1/Nt5e/Nme7/Atp6v1a/Tgfb1/Nudt5/Ndufs5/Ndufa6/Ndufab1/Ndufc1/Ndufs1/Aldoa/Atp5pb/Sdhb/Ndufa11/Ndufa8/Ndufs4/Nme2/Nme1/Ndufb1/Map2k1/Fis1/Antkmt/Ndufb7/Ndufv2/Rhoa/Sdhd/Ndufb6/Vcp/Hspa8/Ndufc2/Ndufb9/Ndufa7/Ndufa13/Ndufb11/Ndufb10	36	GO_BP	up
GO:0009145	purine nucleoside triphosphate biosynthetic process	29/1852	114/28891	9.95764e-11	7.26422e-09	4.50203e-09	Nme7/Tgfb1/Ndufs5/Ndufa6/Ndufab1/Ndufc1/Ndufs1/Aldoa/Atp5pb/Sdhb/Ndufa11/Ndufa8/Ndufs4/Nme2/Nme1/Ndufb1/Map2k1/Antkmt/Ndufb7/Ndufv2/Sdhd/Ndufb6/Vcp/Ndufc2/Ndufb9/Ndufa7/Ndufa13/Ndufb11/Ndufb10	29	GO_BP	up
GO:0016055	Wnt signaling pathway	68/1852	460/28891	1.04882e-10	7.55912e-09	4.68479e-09	Ccn4/Sostdc1/Fgf9/Wnt6/Apcdd1/Dcdc2a/Ndrg2/Cthrc1/Wnt5b/Shisa2/Wnt9a/Tmem64/Dkk3/Sema5a/Wnt10a/Ilk/Csnk1e/Pin1/Fam53b/Map3k1/Mdk/Atp6v0c/Hdac2/Fgfr2/Gprc5b/Amfr/Sox9/Ccdc88c/Nxn/Tgfb1/Nherf1/Ctnnbip1/App/Smarca4/Thra/Znrf3/Tbl1xr1/Wls/Ddit3/Vgll4/Ube2b/Hdac1/Notch1/Fzd6/Rnf14/Gpc4/Leo1/Lgr4/Atp6ap2/Ift20/Nfkb1/Csnk2b/Tnks2/Tcf7l2/Gsk3a/Lrrfip2/Spin1/Wnt4/Cul3/Rab5a/Csnk2a1/G3bp1/Rac1/Gnaq/Sulf1/V…	68	GO_BP	up
GO:0007030	Golgi organization	32/1852	137/28891	1.2144e-10	8.64825e-09	5.35979e-09	Lman1/Atp8b1/Tmed7/Yipf4/Surf4/Obsl1/Ubxn2a/Bag5/Trip11/Cog4/Tmed4/Tmed2/Gorasp2/Golga5/Uso1/Akap9/Cdc42/Nsfl1c/Tmed1/Ywhaz/Dnm2/Stk25/Map2k2/Arl1/Map2k1/Vti1b/Rab1a/Pdcd10/Vmp1/Tmed10/Csnk1a1/Rab2a	32	GO_BP	up
GO:0198738	cell-cell signaling by wnt	68/1852	462/28891	1.27118e-10	8.94614e-09	5.54441e-09	Ccn4/Sostdc1/Fgf9/Wnt6/Apcdd1/Dcdc2a/Ndrg2/Cthrc1/Wnt5b/Shisa2/Wnt9a/Tmem64/Dkk3/Sema5a/Wnt10a/Ilk/Csnk1e/Pin1/Fam53b/Map3k1/Mdk/Atp6v0c/Hdac2/Fgfr2/Gprc5b/Amfr/Sox9/Ccdc88c/Nxn/Tgfb1/Nherf1/Ctnnbip1/App/Smarca4/Thra/Znrf3/Tbl1xr1/Wls/Ddit3/Vgll4/Ube2b/Hdac1/Notch1/Fzd6/Rnf14/Gpc4/Leo1/Lgr4/Atp6ap2/Ift20/Nfkb1/Csnk2b/Tnks2/Tcf7l2/Gsk3a/Lrrfip2/Spin1/Wnt4/Cul3/Rab5a/Csnk2a1/G3bp1/Rac1/Gnaq/Sulf1/V…	68	GO_BP	up
GO:0045454	cell redox homeostasis	15/1852	31/28891	1.35336e-10	9.41369e-09	5.83417e-09	Selenos/Gclc/Txnrd1/Nfe2l1/Gsr/Egln2/Prdx3/Prdx1/Ddit3/Prdx2/Selenot/Prdx5/Txn2/Nfe2l2/Chd6	15	GO_BP	up
GO:0030832	regulation of actin filament length	36/1852	169/28891	1.41737e-10	9.74566e-09	6.03991e-09	Arhgap28/F2rl1/Tpm1/Sema5a/Gsn/Capg/Map3k1/Cdc42ep2/Ptk2b/Vasp/Twf1/Capza2/Mtpn/Evl/Fhod3/Svil/Cttn/Pfn1/Arpc5/Grb2/Naa80/Nck2/Wdr1/Arpc5l/Arpc3/Dbnl/Arpc2/Prkcd/Capzb/Dstn/Rhoa/Pycard/Rac1/Tmsb4x/Snx9/Brk1	36	GO_BP	up
GO:0051495	positive regulation of cytoskeleton organization	39/1852	195/28891	1.80636e-10	1.22792e-08	7.61006e-09	Tac1/Nes/Rgcc/F2rl1/Tpm1/Sema5a/Limch1/Gsn/Sdc4/Rhoc/Map3k1/Gda/Map1b/Cdc42ep2/Ptk2b/Vasp/Evl/Cttn/Pfn1/Rock2/Cdkn1b/Grb2/Akap9/Nck2/Cdc42/Wdr1/Flna/Pfdn2/Wnt4/Arpc2/Cdk5rap2/Cx3cl1/Dstn/Rhoa/Pycard/Rac1/Dctn1/Snx9/Brk1	39	GO_BP	up
GO:0015986	proton motive force-driven ATP synthesis	22/1852	70/28891	2.15462e-10	1.4482e-08	8.97527e-09	Ndufs5/Ndufa6/Ndufab1/Ndufc1/Ndufs1/Atp5pb/Sdhb/Ndufa11/Ndufa8/Ndufs4/Ndufb1/Antkmt/Ndufb7/Ndufv2/Sdhd/Ndufb6/Ndufc2/Ndufb9/Ndufa7/Ndufa13/Ndufb11/Ndufb10	22	GO_BP	up
GO:0009201	ribonucleoside triphosphate biosynthetic process	29/1852	118/28891	2.43541e-10	1.61874e-08	1.00322e-08	Nme7/Tgfb1/Ndufs5/Ndufa6/Ndufab1/Ndufc1/Ndufs1/Aldoa/Atp5pb/Sdhb/Ndufa11/Ndufa8/Ndufs4/Nme2/Nme1/Ndufb1/Map2k1/Antkmt/Ndufb7/Ndufv2/Sdhd/Ndufb6/Vcp/Ndufc2/Ndufb9/Ndufa7/Ndufa13/Ndufb11/Ndufb10	29	GO_BP	up
GO:0010563	negative regulation of phosphorus metabolic process	64/1852	430/28891	2.78124e-10	1.80841e-08	1.12077e-08	Camk2n1/Tgfb2/Ddr2/Cdkn1a/Deptor/Prkch/Prkrip1/Cmya5/Ilk/Spry2/Tsg101/Spry1/Ppp4r4/Dnajc3/Gadd45a/Trib1/Prkar1a/Bax/Tgfb1/Tiprl/Sirpa/Mapk8ip1/Actb/Inpp5k/Tmed2/Prdx3/Niban1/Socs1/Cbl/Rock2/Kat2b/Cdkn2c/Smpd1/Ubash3b/Cdkn1b/Ppp1r11/Chp1/Dynll1/Hyal2/Nck2/Pik3ip1/Hspa4/Ywhae/Ptprj/Sorl1/Errfi1/Pdgfa/Shb/Cdk5rap2/Prkcd/Ppia/Ensa/Fis1/Rb1/Pard3/Atxn1/Pycard/Gnaq/Lrp6/Gnai2/Park7/Arpp19/Rtraf/Ywhab	64	GO_BP	up
GO:0045936	negative regulation of phosphate metabolic process	64/1852	430/28891	2.78124e-10	1.80841e-08	1.12077e-08	Camk2n1/Tgfb2/Ddr2/Cdkn1a/Deptor/Prkch/Prkrip1/Cmya5/Ilk/Spry2/Tsg101/Spry1/Ppp4r4/Dnajc3/Gadd45a/Trib1/Prkar1a/Bax/Tgfb1/Tiprl/Sirpa/Mapk8ip1/Actb/Inpp5k/Tmed2/Prdx3/Niban1/Socs1/Cbl/Rock2/Kat2b/Cdkn2c/Smpd1/Ubash3b/Cdkn1b/Ppp1r11/Chp1/Dynll1/Hyal2/Nck2/Pik3ip1/Hspa4/Ywhae/Ptprj/Sorl1/Errfi1/Pdgfa/Shb/Cdk5rap2/Prkcd/Ppia/Ensa/Fis1/Rb1/Pard3/Atxn1/Pycard/Gnaq/Lrp6/Gnai2/Park7/Arpp19/Rtraf/Ywhab	64	GO_BP	up
[truncated: 5,890 more rows]

## Sheet: TAC TEC_Proliferating TEC
ID	Description	GeneRatio	BgRatio	pvalue	p.adjust	qvalue	geneID	Count	Cluster	Direction
[truncated: 5,190 more rows]

## Sheet: mTEC I_Intertypical
ID	Description	GeneRatio	BgRatio	pvalue	p.adjust	qvalue	geneID	Count	Cluster	Direction
[truncated: 5,577 more rows]

## Sheet: mTEC II_Aire
ID	Description	GeneRatio	BgRatio	pvalue	p.adjust	qvalue	geneID	Count	Cluster	Direction
[truncated: 4,644 more rows]

## Sheet: mTEC III_Post-Aire
ID	Description	GeneRatio	BgRatio	pvalue	p.adjust	qvalue	geneID	Count	Cluster	Direction
[truncated: 1,407 more rows]

## Sheet: Tuft like mTEC
ID	Description	GeneRatio	BgRatio	pvalue	p.adjust	qvalue	geneID	Count	Cluster	Direction
[truncated: 5,214 more rows]

[truncated: 4 more sheets: Globet like mTEC, Ionocyte like mTEC, Neuroendocrine mTEC, aaTECs]
